# Supplementary material for: Single-cell transcriptomic evidence for dense intracortical neuropeptide networks
Source: eLife. 2019 Nov 11;8:e47889. doi: 10.7554/eLife.47889 (PMC6881117; doi:10.7554/eLife.47889)
Supplement: Figure 1—source data 2. [file elife-47889-fig1-data2.csv]

sample_name	brain_region_label	brain_subregion_label	class_label	subclass_label	cluster_id	cluster_label	core_intermediate_call_label	Vip	Npy	Sst	Cck	Tac2	Crh	Penk	Tac1	Pdyn	Cort	Pthlh	Cartpt	Pnoc	Nmb	Trh	Adcyap1	Grp	Nts	Rln1
F1S4_180124_315_E01	ALM	L1-L2/3	GABAergic	Lamp5	1	Lamp5 Krt73	Core	0	804.0846363	0	5664.582108	0	14.20644234	0	0	0	0	0	0	935.731002	0	0	0	0	0	0
F2S4_160420_032_D01	ALM	L2/3	GABAergic	Lamp5	1	Lamp5 Krt73	Core	0	121.5939178	0	1205.979267	0	4.564959372	0	0	0	0	0	0	231.1529427	0	0	0	0	0	0
F2S4_160503_003_D01	ALM	L1	GABAergic	Lamp5	1	Lamp5 Krt73	Core	5.084544679	0.564949409	0.564949409	617.4897038	7.344342314	2.259797635	0	1.129898818	0	0	0	0	177.9590638	0	0	0	0	0	0
F2S4_160503_009_F01	ALM	L2/3	GABAergic	Lamp5	1	Lamp5 Krt73	Core	6.774615827	131.3233222	0	3506.645377	1.042248589	221.4778251	0.521124294	0	0	17.19710172	0	0	881.2211818	0	0	0	0	0.521124294	0
F2S4_160505_002_C01	ALM	L1	GABAergic	Lamp5	1	Lamp5 Krt73	Core	2.027325304	178.4046268	1.520493978	2214.852895	0	0	0	0	0	0	0	0	610.2249165	36.9986868	0	0	0	0	0
F2S4_160505_005_H01	ALM	L1	GABAergic	Lamp5	1	Lamp5 Krt73	Core	0	679.7658009	0	2053.95806	0	0	0	0	0	27.36655992	0	0	509.7021785	0	0	0	0	0	0
F2S4_160518_001_C01	ALM	L2/3	GABAergic	Lamp5	1	Lamp5 Krt73	Core	0.793729222	40.87705492	0	1705.327233	0	9.127886049	0.793729222	0	0	0	0	0	222.6410467	0	0	0	0	0	0
F2S4_160524_007_D01	ALM	L2/3	GABAergic	Lamp5	1	Lamp5 Krt73	Core	0.385271532	0.385271532	0.385271532	2134.019014	0	0.770543063	43.53568308	0	0	0	0	0	342.5063917	0	0	0	0	0	0
F2S4_160525_010_G01	ALM	L5	GABAergic	Lamp5	1	Lamp5 Krt73	Core	2.893348289	443.1645129	0	3070.324759	0.482224715	11.57339315	4.822247148	0	0	0	0	0	479.8135912	0	0	0	0	0	0
F2S4_160526_021_C01	ALM	L2/3	GABAergic	Lamp5	1	Lamp5 Krt73	Core	1.217868073	4.871472293	0.608934037	1227.002084	0	1.217868073	57.23979944	0	0	4.262538256	0	0	158.3228495	0	0	0	0	0	0
F2S4_160601_015_E01	ALM	L1	GABAergic	Lamp5	1	Lamp5 Krt73	Core	2.683311786	904.8127344	0	4629.249494	0	778.6970804	0	0	0	9.659922431	0	0	665.461323	0	0	0	0	0	0
F2S4_160602_001_F01	ALM	L1	GABAergic	Lamp5	1	Lamp5 Krt73	Core	0	463.36506	0	1725.866963	0	0	0	0	0	0	0	0	595.9949142	0	0	0	0	0	0
F2S4_160613_004_A01	ALM	L1	GABAergic	Lamp5	1	Lamp5 Krt73	Core	3.291127909	0	0.658225582	1398.729361	0	11.18983489	0	0	0	0.658225582	0	0	317.922956	0	0	0	0	0	0
F2S4_160620_013_F01	ALM	L2/3	GABAergic	Lamp5	1	Lamp5 Krt73	Core	2.079128512	24.94954215	3.638474897	1188.221945	0.519782128	0	0	0	0	0	0	0	352.932065	0	0	0	0	0	0
F2S4_160629_013_C01	ALM	L1	GABAergic	Lamp5	1	Lamp5 Krt73	Core	0	999.8914145	0	4947.175169	0	213.6520116	0	0	0	0	0	5.027106156	439.8717887	0	0	0	0	0	0
F2S4_160629_014_C01	ALM	L1	GABAergic	Lamp5	1	Lamp5 Krt73	Core	0	370.027954	0	1594.722244	0	1000.385309	66.58320117	0	0	13.6440986	0	0	474.8146313	0	0	0	0	0	0
F2S4_160629_014_G01	ALM	L1	GABAergic	Lamp5	1	Lamp5 Krt73	Core	0.601503759	1853.834586	0	3224.661654	0	61.35338346	0	0	0	0	0	0	473.3834586	0	0	0	0	0	0
F2S4_160707_002_H01	ALM	L1	GABAergic	Lamp5	1	Lamp5 Krt73	Core	0.727493356	145.4986712	3.637466781	4332.222936	0	270.6275285	0	0	0	10.18490699	0	0	598.7270321	0	0	0	0	0	0
F2S4_160707_005_A01	ALM	L1	GABAergic	Lamp5	1	Lamp5 Krt73	Core	0.653896076	10.46233722	0	2066.965497	0	2.615584305	20.27077837	0	0	0	0	0	428.9558261	25.50194698	0	0	0	0	0
F2S4_160707_006_E01	ALM	L1	GABAergic	Lamp5	1	Lamp5 Krt73	Core	0	381.1930052	0	3487.823922	0	0	0	0	0	3.069186837	0	0	591.7392222	0	0	0	0	0	0
F2S4_160819_009_D01	ALM	L1	GABAergic	Lamp5	1	Lamp5 Krt73	Core	1.730447101	0.5768157	0	5389.189089	0.5768157	0.5768157	0	0.5768157	0	0	0	0	546.821284	0	0	0	0	0	0
F2S4_160819_014_F01	ALM	L1	GABAergic	Lamp5	1	Lamp5 Krt73	Core	0.542132652	1030.594172	0	2509.532047	0	0.542132652	0	0	0	0	0	0	453.76503	0	0	0	0	0	0
F2S4_160819_014_H01	ALM	L1	GABAergic	Lamp5	1	Lamp5 Krt73	Core	0.497201007	410.6880317	0	1247.974527	0	0	0	0	0	0	0	0	353.5099159	0	0	0	0	0	0
F2S4_160819_016_C01	ALM	L1	GABAergic	Lamp5	1	Lamp5 Krt73	Core	0	0	0	1268.589499	0.512354402	29.7165553	25.10536568	0.512354402	0	0	0	0	351.4751196	0	0	0	0	0	0
F2S4_180122_002_D01	ALM	L1-L2/3	GABAergic	Lamp5	1	Lamp5 Krt73	Core	0	276.3397079	0	2678.120372	0	19.43013571	0	0	0	0	0	0	470.6410649	3.238355951	0	0	0	0	0
F2S4_180122_003_G01	ALM	L1-L2/3	GABAergic	Lamp5	1	Lamp5 Krt73	Core	0	315.8574031	0	5193.494427	0	212.3868745	0	0	0	0	0	0	638.0682597	0	0	0	0	0	0
F2S4_180122_011_D01	ALM	L1-L2/3	GABAergic	Lamp5	1	Lamp5 Krt73	Core	0	2683.275143	0	4589.938435	0	581.7424572	205.3770579	0	0	47.7621065	0	0	1215.067989	0	0	0	0	0	0
F1S4_160108_001_H01	VISp	L2/3	GABAergic	Lamp5	1	Lamp5 Krt73	Core	1.680044488	1.120029658	0	1180.51126	0	0	0.560014829	0	0	0	0	0	170.2445081	0	0	0	0	0	0
F1S4_160108_004_A01	VISp	L2/3	GABAergic	Lamp5	1	Lamp5 Krt73	Core	2.620869248	3.145043098	0	1805.254738	0.52417385	2.096695398	0	0	0	0	0	0	590.2197546	0	0	0	0	0	0
F1S4_160108_005_G01	VISp	L1	GABAergic	Lamp5	1	Lamp5 Krt73	Core	1.370867691	0.685433845	0	3344.231731	0	0	1.370867691	0	0	0	0	0.685433845	603.1817839	0	0	0	0	0	0
F1S4_160108_006_B01	VISp	L1	GABAergic	Lamp5	1	Lamp5 Krt73	Core	0	2.3516533	0.587913325	1225.799283	0	0	38.21436613	0	0	0	0	0	827.1940484	0	0	0	0	0	0
F1S4_180124_303_D01	VISp	L1-L4	GABAergic	Lamp5	1	Lamp5 Krt73	Core	0	0	0	3105.906366	0	0	0	0	0	0	0	0	376.5358496	0	0	0	0	0	0
F1S4_180124_307_D01	VISp	L1-L4	GABAergic	Lamp5	1	Lamp5 Krt73	Core	0	0	0	1096.170391	0	0	0	0	0	0	0	0	308.3252176	0	0	0	0	0	0
F1S4_180124_313_D01	VISp	L1-L4	GABAergic	Lamp5	1	Lamp5 Krt73	Core	0	0	0	3750.688751	0	0	0	0	0	36.9799236	0	0	321.7253353	0	0	0	0	0	0
F2S4_151223_018_C01	VISp	L1	GABAergic	Lamp5	1	Lamp5 Krt73	Core	0.72952018	0	0	1531.262858	0	0	0.72952018	0	0	0.72952018	0	0	682.8308885	0	0	0	0	0	0
F2S4_160114_010_F01	VISp	L1	GABAergic	Lamp5	1	Lamp5 Krt73	Core	1.924686998	46.83405028	22.45468164	2059.415088	0	0	0.641562333	0	0.641562333	0	0.641562333	0	368.2567789	17.32218298	0	0	0	0	0
F2S4_160114_011_E01	VISp	L1	GABAergic	Lamp5	1	Lamp5 Krt73	Core	0	89.91580611	4.541202329	2593.02653	0.908240466	0	0	0	0.908240466	0	0	0	128.0619057	0	0	0	0	0	0
F2S4_160119_006_B01	VISp	L1	GABAergic	Lamp5	1	Lamp5 Krt73	Core	0	1.053917913	0	1605.643941	0	0	59.01940316	0	0	0	0	0	439.4837699	0	0	0	0	0	0
F2S4_160303_018_E01	VISp	L1	GABAergic	Lamp5	1	Lamp5 Krt73	Core	0.658373357	0.658373357	0	3653.972131	0	0	0	0	0	0	0	0	228.4555549	0	0	0	0	0	0
F2S4_160304_017_C01	VISp	L2/3	GABAergic	Lamp5	1	Lamp5 Krt73	Core	0	0.618767465	0	1637.877479	0	0	0	0	0	0	0	0	194.9117514	0	0	0	0	0	0
F2S4_160404_004_C01	VISp	L1	GABAergic	Lamp5	1	Lamp5 Krt73	Core	0.968066862	226.0436124	0	1685.404408	0	0	0.968066862	0	0	2.420167156	0	0	322.8502986	2.420167156	0	0	0	0	0
F2S4_160404_004_E01	VISp	L1	GABAergic	Lamp5	1	Lamp5 Krt73	Core	0.467716128	0.935432256	0.935432256	2461.589982	0.467716128	0	0	0	0	0	0	0	352.6579606	0	0	0	0	0	0
F2S4_160404_004_F01	VISp	L1	GABAergic	Lamp5	1	Lamp5 Krt73	Core	3.382768263	13.10822702	0	1475.732655	0	0	0	0	0.422846033	0	0	0	386.058428	0	0	0	0	0	0
F2S4_160404_013_E01	VISp	L2/3	GABAergic	Lamp5	1	Lamp5 Krt73	Core	16.85956392	129.2566567	0	2500.835315	0	0	35.76271134	0	0	0.510895876	0	0	215.0871639	0	0	0	0	0	11.75060516
F2S4_160404_031_D01	VISp	L1	GABAergic	Lamp5	1	Lamp5 Krt73	Core	6.820308991	0.524639153	0	2008.843318	0	0	0.524639153	0	0	0	0	0	341.0154496	0	0	0	0	0	14.16525714
F2S4_160404_045_A01	VISp	L2/3	GABAergic	Lamp5	1	Lamp5 Krt73	Core	3.317597966	0.663519593	0.99527939	2371.419026	11.27983309	0.663519593	0	0	0	0	0	0	310.5271696	0	0	0	0	0	0
F2S4_160404_046_E01	VISp	L2/3	GABAergic	Lamp5	1	Lamp5 Krt73	Core	76.08869015	36.58110103	5.852976165	1605.178713	1.463244041	2.926488083	8.779464248	0	0	1.463244041	0	0	286.7958321	0	0	0	0	0	0
F2S4_160405_034_D01	VISp	L2/3	GABAergic	Lamp5	1	Lamp5 Krt73	Core	3.796684301	1.084766943	0	2370.758154	0.542383472	4.339067773	0	0	0	0	0	0	395.3975508	0	0	0	0	0	0
F2S4_160405_044_G01	VISp	L1	GABAergic	Lamp5	1	Lamp5 Krt73	Core	0.487529483	12.67576657	0	1790.695792	0	0	0	0	0	0	0	0	306.656045	0	0	0	0	0	0
F2S4_160406_001_H01	VISp	L2/3	GABAergic	Lamp5	1	Lamp5 Krt73	Core	0.518291277	0	0	1317.496425	0	21.24994234	0.518291277	0	0	0	0	0	462.83411	0	0	0	0	0	0
F2S4_160413_007_C01	VISp	L1	GABAergic	Lamp5	1	Lamp5 Krt73	Core	0	0.430279639	0.430279639	816.2404747	0	1.721118555	0	0	0	0	0	0	198.3589135	0	0	0	0	0	0
F2S4_160413_010_A01	VISp	L1	GABAergic	Lamp5	1	Lamp5 Krt73	Core	0	0	1.246870874	906.8907488	0	31.58739547	0	0	0	0	0	0	309.6396003	0	0	0	0	0	0
F2S4_160414_009_E01	VISp	L1	GABAergic	Lamp5	1	Lamp5 Krt73	Core	1.016658457	0	0.508329229	1569.720658	0.508329229	0	117.932381	0	0	0	0	0	314.6557925	0	0	0	0	0	18.29985223
F2S4_160415_021_H01	VISp	L1	GABAergic	Lamp5	1	Lamp5 Krt73	Core	5.970698796	0.995116466	0.497558233	1592.683904	0.497558233	123.892	0	0	0	6.468257029	0	0	281.1204016	0	0	0	0	0	0
F2S4_160419_002_D01	VISp	L1	GABAergic	Lamp5	1	Lamp5 Krt73	Core	3.29795507	620.6751442	0.659591014	1154.943866	0	0	0	0	0	5.936319126	0	0	415.5423388	0	0	0	0	0	0
F2S4_160429_007_F01	VISp	L1	GABAergic	Lamp5	1	Lamp5 Krt73	Intermediate	0.854154415	4.270772074	0.427077207	2226.353482	0.854154415	178.5182727	27.76001848	0	0	7.260312527	0	0.427077207	302.3706629	0	0	0	0	0	0
F2S4_160429_008_G01	VISp	L1	GABAergic	Lamp5	1	Lamp5 Krt73	Core	3.615964665	1.807982332	0	1372.710586	0	9.491907245	10.84789399	0	0.451995583	0	0	0	583.0743022	0	0	0	0	0	0
F2S4_160429_009_A01	VISp	L1	GABAergic	Lamp5	1	Lamp5 Krt73	Core	4.152847634	71.11751573	0.519105954	2640.172883	0.519105954	6.22927145	0	0	0	0	0	0	180.1297661	0	0	0	0	0	0
F2S4_160502_008_D01	VISp	L2/3	GABAergic	Lamp5	1	Lamp5 Krt73	Core	0	0.436267626	0	1248.597945	0.436267626	0	0.436267626	0	0	0	0	0	169.2718388	0	0	0	0	0	0
F2S4_160502_010_B01	VISp	L2/3	GABAergic	Lamp5	1	Lamp5 Krt73	Core	7.038807013	39.74855725	0.414047471	2097.56449	0.828094943	30.22546541	0.828094943	0	0	0	0	0	369.3303445	2.8983323	0	0	0	0	0
F2S4_160504_004_C01	VISp	L1	GABAergic	Lamp5	1	Lamp5 Krt73	Core	6.148552379	0	1.117918614	1103.385672	0.558959307	1.676877922	0	0	0	0	0	0	524.3038302	0	0	0	0	0	0
F2S4_170526_002_A01	VISp	L1-L4	GABAergic	Lamp5	1	Lamp5 Krt73	Core	0	119.8915616	0	2165.805798	0	0	0	0	5.64195584	0	0	0	226.0308559	0	0	0	0	0	0
F2S4_170526_002_H01	VISp	L1-L4	GABAergic	Lamp5	1	Lamp5 Krt73	Core	0	0	1.684882114	1562.447347	0	0	12.35580217	0	0	0	0	0	261.1567277	0	0	0	0	0	0
F2S4_170526_007_C01	VISp	L1-L4	GABAergic	Lamp5	1	Lamp5 Krt73	Core	0	85.49622526	0.57380017	2811.620831	0	0	0	0	0	0	0	0.57380017	207.1418612	0	0	0	0	0	0
F2S4_170526_008_D01	VISp	L1-L4	GABAergic	Lamp5	1	Lamp5 Krt73	Core	0	0.438793563	0	1580.973209	0	0	0	0	0	13.60260047	0	0	235.19335	0	0	0	0	0	0
F2S4_170526_012_D01	VISp	L1-L4	GABAergic	Lamp5	1	Lamp5 Krt73	Core	0	16.35961091	2.42364606	1528.108841	0.605911515	52.1083903	0.605911515	0.605911515	0	0	0	0	387.7833697	0	0	0	0	0	0
F2S4_170526_014_A01	VISp	L1-L4	GABAergic	Lamp5	1	Lamp5 Krt73	Core	0	23.5049666	0.522332591	1958.224884	0	0	0	0	0.522332591	0	0	0	392.2717759	0	0	0	0	0	0
F2S4_170526_014_E01	VISp	L1-L4	GABAergic	Lamp5	1	Lamp5 Krt73	Core	0	54.96846997	4.137411718	3413.955726	0	0	0	0.591058817	0	0	0	0	198.0047036	0	0	0	0	0	0
F1S4_180124_315_A01	ALM	L1-L2/3	GABAergic	Lamp5	2	Lamp5 Fam19a1 Pax6	Core	0	3576.056619	0	4715.742956	0	0.830675173	0	0	0	21.59755449	0	0	558.2137161	0	0	0	0	0	31.56565657
F2S4_160505_002_H01	ALM	L1	GABAergic	Lamp5	2	Lamp5 Fam19a1 Pax6	Core	3.255511418	12.37094339	0	1670.72846	0.651102284	0	0	0	0	1.953306851	0	0	192.0751737	0	0	0	0	0	16.92865937
F2S4_160505_012_C01	ALM	L2/3	GABAergic	Lamp5	2	Lamp5 Fam19a1 Pax6	Core	129.0474557	227.8814197	0	1232.095946	0	0	0	0	0	0	0	0	0	0	0	0	0	0	0
F2S4_160506_003_G01	ALM	L2/3	GABAergic	Lamp5	2	Lamp5 Fam19a1 Pax6	Core	2.705793157	0.541158631	0	893.4529005	0	132.0427061	0	0	0	0	0	0	131.5015474	0	0	0	0	0	6.493903577
F2S4_160523_001_C01	ALM	L1	GABAergic	Lamp5	2	Lamp5 Fam19a1 Pax6	Core	1.219469563	0.812979709	0.406489854	1038.581578	0	0	0	0	0	0	0	0	31.29971879	0	0	0	0	0	24.79588112
F2S4_160523_002_H01	ALM	L2/3	GABAergic	Lamp5	2	Lamp5 Fam19a1 Pax6	Core	2.3826486	51.52477597	0	865.794935	0.893493225	0.59566215	0	0	0	0	0	0	182.570449	0	0	0	0	0	0
F2S4_160524_008_F01	ALM	L1	GABAergic	Lamp5	2	Lamp5 Fam19a1 Pax6	Core	1.393315569	1.393315569	0	925.1615375	0	0.696657784	0.696657784	0	0	0	0	0	94.74545866	0	0	0	0	0	0
F2S4_160525_021_B01	ALM	L1	GABAergic	Lamp5	2	Lamp5 Fam19a1 Pax6	Core	2.961243248	1.480621624	0	2849.456316	12.58528381	1.480621624	0	0	0	0	0	0	0	0	0	0	0	0	0
F2S4_160526_008_G01	ALM	L1	GABAergic	Lamp5	2	Lamp5 Fam19a1 Pax6	Core	2.061107722	181.3774795	0	2628.324567	34.62660973	0	0.412221544	0	0	6.59554471	0	0	163.2397316	0	0	0	0	0	17.72552641
F2S4_160526_020_A01	ALM	L2/3	GABAergic	Lamp5	2	Lamp5 Fam19a1 Pax6	Core	3.926199233	4651.564541	0	4211.830227	1.472324712	0.490774904	0.490774904	0	0	0	0	0	379.8597758	0	0	0	0	0	0
F2S4_160531_008_B01	ALM	L1	GABAergic	Lamp5	2	Lamp5 Fam19a1 Pax6	Core	1.044192307	7.309346148	0.522096153	316.9123651	1.044192307	0	0	0	0	0	0	0	18.27336537	1.044192307	0	0	0	0	0
F2S4_160531_019_A01	ALM	L1	GABAergic	Lamp5	2	Lamp5 Fam19a1 Pax6	Intermediate	1.666541676	1.111027784	1.111027784	873.8233521	0	0	0	0	0	0	0	0	0	0	0	0	0	0	0
F2S4_160531_020_H01	ALM	L1	GABAergic	Lamp5	2	Lamp5 Fam19a1 Pax6	Core	1.257088407	284.7305242	0	2069.796063	0.628544204	0	23.88467974	0	0	20.11341452	0	0	186.6776285	0	0	0	0	0	0
F2S4_160602_002_G01	ALM	L1	GABAergic	Lamp5	2	Lamp5 Fam19a1 Pax6	Core	0.576473538	132.0124403	0	1032.464107	0	0	0	0	0	0	0	0	76.09450707	0.576473538	0	0	0	0	0
F2S4_160613_004_G01	ALM	L1	GABAergic	Lamp5	2	Lamp5 Fam19a1 Pax6	Core	0.51119622	1.022392439	1.533588659	1970.661427	0	0	0	0	0	0	0	0	206.5232727	0	0	0	0	0	0
F2S4_160613_006_F01	ALM	L1	GABAergic	Lamp5	2	Lamp5 Fam19a1 Pax6	Core	1.866445845	39.19536275	0	871.0080612	0	0	0	0	0	0	0	0	16.79801261	0	0	0	0	0	20.5309043
F2S4_160620_001_D01	ALM	L2/3	GABAergic	Lamp5	2	Lamp5 Fam19a1 Pax6	Core	1.552925245	42.86073677	0.621170098	4994.828759	77.33567722	0	0	0	0	0	0	0	695.7105099	39.75488628	0	0	0	0	25.46797402
F2S4_160620_015_C01	ALM	L2/3	GABAergic	Lamp5	2	Lamp5 Fam19a1 Pax6	Core	0.487171555	31.17897952	0.487171555	1556.513118	0	0	0	0	0	0	0	0	345.4046325	0	0	0	0	0	0
F2S4_160623_027_G01	ALM	L2/3	GABAergic	Lamp5	2	Lamp5 Fam19a1 Pax6	Intermediate	0	101.535187	0	1434.654586	0	0	0	0	0	0	0	0	72.70420794	107.8027911	0	0	0	0	0
F2S4_160630_002_F01	ALM	L1	GABAergic	Lamp5	2	Lamp5 Fam19a1 Pax6	Core	0	43.89647018	0	1588.808351	0	0	0	0.609673197	0	0	0	0	22.55790828	0	0	0	0	0	0
F2S4_160707_001_A01	ALM	L1	GABAergic	Lamp5	2	Lamp5 Fam19a1 Pax6	Intermediate	0	0.671952243	0	1532.051114	0	0	0	0	0	0	0	0	16.12685383	0	0	0	0	0	16.12685383
F2S4_160707_001_B01	ALM	L1	GABAergic	Lamp5	2	Lamp5 Fam19a1 Pax6	Core	2.692027359	7013.404277	0	1695.977236	0.67300684	0	0	0	0	0	0	0	265.1646949	0	0	127.1982927	0	0	0
F2S4_160721_002_D01	ALM	L1	GABAergic	Lamp5	2	Lamp5 Fam19a1 Pax6	Core	0.578408809	74.61473635	0.578408809	1508.490174	0.578408809	0	0	0	0	10.98976737	0	0	491.6474876	13.30340261	0	0	0	0	0
F2S4_160721_003_C01	ALM	L1	GABAergic	Lamp5	2	Lamp5 Fam19a1 Pax6	Core	0	39.60189194	0	1934.7533	0	0	0	0	0	33.28854685	0	0	215.801614	0	0	0	0	0	0
F2S4_160721_006_B01	ALM	L1	GABAergic	Lamp5	2	Lamp5 Fam19a1 Pax6	Core	0	129.7540693	0	1482.235674	0	0	0	0	0	11.105078	0	0	479.8562652	0	0	0	0	0	29.80836727
F2S4_160721_006_H01	ALM	L1	GABAergic	Lamp5	2	Lamp5 Fam19a1 Pax6	Intermediate	0.610897806	1975.643504	0	1832.693418	0	0	0	0	0	0	0	0	257.7988741	0	0	0	0	0	0
F2S4_160819_005_B01	ALM	L1	GABAergic	Lamp5	2	Lamp5 Fam19a1 Pax6	Core	1.111770144	3.891195503	0	1197.93233	0	0	0	0	0	0	0	0	56.70027733	0	0	1.111770144	0	0	0
F2S4_160819_006_D01	ALM	L1	GABAergic	Lamp5	2	Lamp5 Fam19a1 Pax6	Core	1.003064362	1.003064362	4.012257446	1506.602671	0.501532181	0	0	0	0	0	0	0.501532181	216.1603699	0	0	0	0	0	0
F2S4_160819_007_D01	ALM	L1	GABAergic	Lamp5	2	Lamp5 Fam19a1 Pax6	Core	0.781174934	176.5455351	0	1559.225168	1214.727022	0.781174934	0	0.781174934	0	0	0	0	0	0	0	0	0	0	0
F2S4_160819_008_C01	ALM	L1	GABAergic	Lamp5	2	Lamp5 Fam19a1 Pax6	Core	0	26.56873819	0	804.8383616	0	0	0	0	0	0	0	0	48.60135034	0	0	0	0	0	0
F2S4_160819_015_E01	ALM	L1	GABAergic	Lamp5	2	Lamp5 Fam19a1 Pax6	Core	16.51270365	430.7661823	0	2039.677873	1034.556781	0.717943637	0.717943637	0	0	0	0	0	80.40968736	0	0	0	0	0	0
F2S4_160919_008_E01	ALM	L1-L6	GABAergic	Lamp5	2	Lamp5 Fam19a1 Pax6	Core	5.01241484	0	0	808.8214856	0.455674076	105.7163857	16.40426675	0	0	0	0	0	184.5480009	0	0	0	0	0	0
F2S4_161020_007_H01	ALM	L1	GABAergic	Lamp5	2	Lamp5 Fam19a1 Pax6	Core	2.607910104	0.521582021	0	1639.853874	1.043164042	0.521582021	0.521582021	0	0	0	0	0	199.244332	0	0	0	0	0	0
F1S4_160108_006_C01	VISp	L1	GABAergic	Lamp5	2	Lamp5 Fam19a1 Pax6	Core	1.022689387	0.511344693	0.511344693	1659.824875	0	0	0	0	0	0	0	0	259.2517595	0	0	0	0	0	25.56723467
F1S4_180124_303_H01	VISp	L1-L4	GABAergic	Lamp5	2	Lamp5 Fam19a1 Pax6	Core	0	0	0	2357.664106	0	0	48.18263848	0	0	0	0	0	278.1452312	0	0	0	0	0	0
F1S4_180124_307_A01	VISp	L1-L4	GABAergic	Lamp5	2	Lamp5 Fam19a1 Pax6	Core	0	0	0	3632.274032	0	12.48534173	0	0	0	26.89150526	0	0	557.9987342	0	0	0	0	0	0
F1S4_180124_310_F01	VISp	L1-L4	GABAergic	Lamp5	2	Lamp5 Fam19a1 Pax6	Core	0	0	0	2737.951458	0	0	0	0	0	0	0	0	209.3062065	0	0	0	0	0	0
F2S4_151223_001_G01	VISp	L2/3	GABAergic	Lamp5	2	Lamp5 Fam19a1 Pax6	Intermediate	8665.367811	121.9346128	0.89003367	2161.001751	487.7384511	0	0	0	0	0	0	0	48.95185185	0	0	0	0	0	0
F2S4_151223_003_B01	VISp	L2/3	GABAergic	Lamp5	2	Lamp5 Fam19a1 Pax6	Core	4.28079672	2.14039836	1.60529877	903.248108	0	0	0	0	0	0	0	0	0	0	0	0	0	0	0
F2S4_160114_014_B01	VISp	L1	GABAergic	Lamp5	2	Lamp5 Fam19a1 Pax6	Core	2.035349958	1.356899972	0.678449986	1879.306461	0	37.31474923	0	0	0	10.17674979	0	0	82.09244831	0	0	0	0	0	0
F2S4_160115_024_B01	VISp	L1	GABAergic	Lamp5	2	Lamp5 Fam19a1 Pax6	Core	0.852554167	1.705108334	0	1310.375755	0.852554167	0	0	0	0	0	0	0	0	0	0	0	0	0	0
F2S4_160115_026_A01	VISp	L1	GABAergic	Lamp5	2	Lamp5 Fam19a1 Pax6	Core	1.586522177	0	0	1548.445645	0	6.346088707	0	0	0	0	0	0	406.9429384	0	0	0	0	0	0
F2S4_160303_021_F01	VISp	L2/3	GABAergic	Lamp5	2	Lamp5 Fam19a1 Pax6	Core	8174.170679	459.5372883	0	8970.802754	2313.558617	0	0	0	0	0	0	0	439.8860227	0	0	0	0	0	0
F2S4_160304_001_D01	VISp	L1	GABAergic	Lamp5	2	Lamp5 Fam19a1 Pax6	Core	4.421465108	0	2.210732554	2070.90372	0.552683138	0	0	0	0	0	0	0	202.2820287	0	0	0	0	0	0
F2S4_160304_018_E01	VISp	L2/3	GABAergic	Lamp5	2	Lamp5 Fam19a1 Pax6	Core	21.27875596	21.27875596	0	1048.130722	0.607964456	0	0	0	0	0	0	0	0	0	0	0	0	0	0
F2S4_160321_001_A01	VISp	L2/3	GABAergic	Lamp5	2	Lamp5 Fam19a1 Pax6	Core	1.002526869	0	0	789.4899093	0.501263434	0	0	0	0	0	0	0	0.501263434	0	0	0	0	0	0
F2S4_160330_002_H01	VISp	L2/3	GABAergic	Lamp5	2	Lamp5 Fam19a1 Pax6	Core	1.308283484	0.872188989	0	3618.712117	0	0.436094495	0.872188989	0	0	0	0	0	199.2951841	0	0	0	0	0	0
F2S4_160404_001_A01	VISp	L1	GABAergic	Lamp5	2	Lamp5 Fam19a1 Pax6	Core	7.129557775	28.5182311	0	1374.907796	1.096855042	1.096855042	0	0	0	14.80754307	0	0	108.5886492	0	0	0	0	0	14.25911555
F2S4_160404_028_C01	VISp	L1	GABAergic	Lamp5	2	Lamp5 Fam19a1 Pax6	Core	0	0	0	1914.989868	0	0	0	0	0	0	0	0	0	0	0	0	0	0	0
F2S4_160404_029_H01	VISp	L1	GABAergic	Lamp5	2	Lamp5 Fam19a1 Pax6	Core	0	0.735227082	0	1142.542886	0	0	0	0	0	0	0	0	35.29089995	0	0	0	0	0	0
F2S4_160404_032_A01	VISp	L1	GABAergic	Lamp5	2	Lamp5 Fam19a1 Pax6	Core	1.514653515	0	0	1943.30046	34.83703086	0	0	0	0	0	0.504884505	0	0	0	0	0	0	0	0
F2S4_160404_037_A01	VISp	L1	GABAergic	Lamp5	2	Lamp5 Fam19a1 Pax6	Core	8.863918397	1.363679753	6.136558891	1864.150223	0	3.409199384	0.681839877	0	0	0	0	0	2.727359507	0	0	0	0	0	0
F2S4_160404_037_D01	VISp	L1	GABAergic	Lamp5	2	Lamp5 Fam19a1 Pax6	Core	4.170811411	3.649459984	0	1041.138798	0	2.606757132	6.777568542	0	0	0	1.564054279	0	1.042702853	0	0	0	0	0	0
F2S4_160405_032_F01	VISp	L1	GABAergic	Lamp5	2	Lamp5 Fam19a1 Pax6	Intermediate	0.991746192	17.35555837	0	1484.64405	0	0	0	0	0	0	0	0	0	0	0	0	0	0	0
F2S4_160405_042_B01	VISp	L1	GABAergic	Lamp5	2	Lamp5 Fam19a1 Pax6	Intermediate	0	0	0.450365855	1425.40793	0	0	0	0	0	0	0	0	0	2.251829274	0	0	0	0	0
F2S4_160405_042_F01	VISp	L1	GABAergic	Lamp5	2	Lamp5 Fam19a1 Pax6	Core	5.504893851	1.000889791	0.500444896	1463.300874	178.1583828	0.500444896	0	0	0	0	0	0	74.06584454	0	0	0	0	0	0
F2S4_160405_043_G01	VISp	L1	GABAergic	Lamp5	2	Lamp5 Fam19a1 Pax6	Core	0	0	0	582.141668	0	0	0	0	0	0	0	0	43.81122619	0	0	0	0	0	0
F2S4_160413_006_A01	VISp	L1	GABAergic	Lamp5	2	Lamp5 Fam19a1 Pax6	Core	0	1.862079496	0.931039748	1652.595553	0	0	0	0	0	18.15527509	0	0	249.9841723	0	0	0	0	0	0
F2S4_160413_008_E01	VISp	L1	GABAergic	Lamp5	2	Lamp5 Fam19a1 Pax6	Core	35.97357142	0.444118166	2.220590828	3130.58895	0	0	0.888236331	0	0	8.882363313	0	0	23.98238094	0	0	0	0	0	0
F2S4_160414_009_C01	VISp	L1	GABAergic	Lamp5	2	Lamp5 Fam19a1 Pax6	Core	0	0.579424631	1.158849263	1428.861141	0	0	0	0	0	1.158849263	0	0	259.0028102	0	0	0	0	0	0
F2S4_160414_010_B01	VISp	L2/3	GABAergic	Lamp5	2	Lamp5 Fam19a1 Pax6	Core	0	1833.065097	1.415494284	1710.388926	1342.360412	0	0	0	0	51.42962563	0	0	115.5986998	0	0	0	0	0	0
F2S4_160415_016_C01	VISp	L1	GABAergic	Lamp5	2	Lamp5 Fam19a1 Pax6	Core	0.467795989	0.467795989	0	2807.711523	0	0	0	0	0	11.22710373	0	0	373.3011989	0	0	0	0	0	0
F2S4_160415_018_H01	VISp	L1	GABAergic	Lamp5	2	Lamp5 Fam19a1 Pax6	Core	891.3507281	1.267924222	0.422641407	918.8224196	0.422641407	0	0	0	0	5.071696888	0	0.422641407	0	0	0	0	0	0	0
F2S4_160415_019_H01	VISp	L1	GABAergic	Lamp5	2	Lamp5 Fam19a1 Pax6	Core	0.525992443	0	1.577977328	2090.293967	128.8681484	0	0	0	0	11.04584129	0	0	0	0	0	0	0	0	29.45557678
F2S4_160419_001_D01	VISp	L1	GABAergic	Lamp5	2	Lamp5 Fam19a1 Pax6	Core	0	0	0	2648.936878	0	0	0	0	0	67.62299625	0	0	85.3601756	0	0	0	0	0	0
F2S4_160419_001_F01	VISp	L1	GABAergic	Lamp5	2	Lamp5 Fam19a1 Pax6	Core	1.723032813	24.69680366	0	1806.887077	0	772.4930447	0	0	0	16.65598386	0	0	202.1691834	0	0	0	0	0	0
F2S4_160419_001_G01	VISp	L1	GABAergic	Lamp5	2	Lamp5 Fam19a1 Pax6	Core	1.127590851	8.456931386	2.255181703	4769.145506	0	0	0	0	0	6.765545108	0	0	249.7613736	0	0	0	0	0	0
F2S4_160429_002_F01	VISp	L1	GABAergic	Lamp5	2	Lamp5 Fam19a1 Pax6	Core	0.888600982	0	2.221502455	2395.223947	79.5297879	0	0.888600982	0	0	19.9935221	0	0	20.43782259	0	0	0	0	0	0
F2S4_160502_018_G01	VISp	L1	GABAergic	Lamp5	2	Lamp5 Fam19a1 Pax6	Core	0.978427149	33.75573664	0	4148.041898	0.489213575	0	0	0	0	9.295057916	0	15.16562081	36.69101809	0.489213575	0	0	0	0	0
F2S4_160502_019_A01	VISp	L1	GABAergic	Lamp5	2	Lamp5 Fam19a1 Pax6	Core	1.458637419	0.972424946	0.486212473	1342.91885	0	0	52.99715955	0	0	0	0	0	1.944849892	0	0	0	0	0	0
F2S4_160504_003_G01	VISp	L1	GABAergic	Lamp5	2	Lamp5 Fam19a1 Pax6	Core	1.303630829	2.172718049	0	1294.07087	0	0	0	0	0	0	0	0	0	0	0	0	0	0	0
F2S4_160504_004_F01	VISp	L1	GABAergic	Lamp5	2	Lamp5 Fam19a1 Pax6	Core	1.573960399	24.65871292	0	2291.161688	0	0	0.524653466	0	0	0	0	0	171.5616835	0	0	0	0	0	0
F2S4_160504_005_B01	VISp	L1	GABAergic	Lamp5	2	Lamp5 Fam19a1 Pax6	Core	3.320031075	5.21719169	0	1674.244242	0	0	12.80583415	0	0	17.07444553	0	0	207.2647971	0	0	0	0	0	0
F2S4_160504_008_H01	VISp	L1	GABAergic	Lamp5	2	Lamp5 Fam19a1 Pax6	Intermediate	1.089223765	3887.439616	0.544611882	1268.401074	0	0.544611882	0	0	0	1.633835647	0	0	347.4623809	0	0	0	0	0	0
F2S4_160504_009_B01	VISp	L1	GABAergic	Lamp5	2	Lamp5 Fam19a1 Pax6	Core	0	0.437438622	0.437438622	3251.481277	918.1836674	0.437438622	0	0	0	0	0	0	51.61775738	0	0	0	0	0	0
F2S4_170707_021_C01	VISp	L1	GABAergic	Lamp5	2	Lamp5 Fam19a1 Pax6	Core	2.323063842	2.323063842	0	3530.476275	0	0	0	0	0	25.55370227	0	0	52.84970242	0	0	0	0	0	0
F2S4_160308_001_B01	ALM	L1	GABAergic	Lamp5	3	Lamp5 Fam19a1 Tmem182	Core	0	0	0	1754.413087	0	0	0	0	0	0	0	0	0	12.46740397	0	0	0	0	0
F2S4_160308_001_D01	ALM	L1	GABAergic	Lamp5	3	Lamp5 Fam19a1 Tmem182	Intermediate	0.499390993	7.990255883	0	693.1546978	0	0	0	0	0	0	0	0	71.41291195	0	0	0	0	0	23.47137666
F2S4_160308_004_A01	ALM	L1	GABAergic	Lamp5	3	Lamp5 Fam19a1 Tmem182	Core	0.414150015	0.82830003	0	404.2104147	0	0	0	0	0	0	0	0	72.47625264	16.15185059	0	0	0	0	0
F2S4_160503_003_E01	ALM	L1	GABAergic	Lamp5	3	Lamp5 Fam19a1 Tmem182	Core	5.770839946	0	0	491.2427504	0	0	2.885419973	0	0	0.721354993	0	0	0	0	0	0	0	0	0
F2S4_160505_001_B01	ALM	L1	GABAergic	Lamp5	3	Lamp5 Fam19a1 Tmem182	Core	1.835042859	133.9581287	0	698.0503037	329.5736975	0.367008572	0	0	0	0	0	0	0	0	0	0	0	0	0
F2S4_160505_005_A01	ALM	L1	GABAergic	Lamp5	3	Lamp5 Fam19a1 Tmem182	Core	0	140.7320309	0	117.7865911	96.37084726	0	82.60358336	0	0.509898663	0.509898663	0	0	0	0	0	0	0	0	0
F2S4_160505_005_B01	ALM	L1	GABAergic	Lamp5	3	Lamp5 Fam19a1 Tmem182	Core	6.730655975	1565.839036	0	977.3873997	0	0.480761141	0	0	0	0.961522282	0	0	60.09514263	0	0	0	0	0	0
F2S4_160505_005_D01	ALM	L1	GABAergic	Lamp5	3	Lamp5 Fam19a1 Tmem182	Core	0.549635674	5443.04208	2.198542696	318.2390552	0.549635674	0	0	0	0	0.549635674	0	0	0	4.397085392	0	0	0	0	0
F2S4_160505_005_G01	ALM	L1	GABAergic	Lamp5	3	Lamp5 Fam19a1 Tmem182	Core	2.990117661	63.78917677	1.993411774	835.2395333	195.3543539	0	0	0	0	0	0	0	0	0	0	0	0	0	0
F2S4_160518_010_B01	ALM	L2/3	GABAergic	Lamp5	3	Lamp5 Fam19a1 Tmem182	Core	0	2900.514628	0	16.75253114	0	0	0	0	0	20.94066393	0	0	77.71313059	0	0	0	0	0	35.36645464
F2S4_160518_010_F01	ALM	L2/3	GABAergic	Lamp5	3	Lamp5 Fam19a1 Tmem182	Core	0	2059.927022	0	621.7234286	46.81652324	0	0	0	0	0	0	0	0	0	0	0	0	0	15.9176179
F2S4_160518_011_C01	ALM	L2/3	GABAergic	Lamp5	3	Lamp5 Fam19a1 Tmem182	Core	0	0	0.418244144	2097.912627	0	0.418244144	0	0	0	13.80205676	0	0.418244144	120.4543135	0	0	0	0	0	0
F2S4_160524_001_C01	ALM	L1	GABAergic	Lamp5	3	Lamp5 Fam19a1 Tmem182	Core	0.752105897	187.6504212	0.752105897	941.2605295	1571.525271	0.376052948	0.752105897	0	0	0	0	0	0	0	0	0	0	0	0
F2S4_160524_001_F01	ALM	L1	GABAergic	Lamp5	3	Lamp5 Fam19a1 Tmem182	Core	2.008115464	10.04057732	0.669371821	338.0327698	0	0	32.12984742	0	0	0	0	0	0	0	0	0	0	0	0
F2S4_160524_008_E01	ALM	L1	GABAergic	Lamp5	3	Lamp5 Fam19a1 Tmem182	Core	10.17240126	3178.277017	0	0.299188272	0.598376545	0.299188272	0.299188272	0	0	0	0	0	137.9257935	0	0	0	0	0	0
F2S4_160524_008_H01	ALM	L1	GABAergic	Lamp5	3	Lamp5 Fam19a1 Tmem182	Core	2.665058748	518.3539265	0	878.8031221	0	0	0	0	0	0	0	0	115.9300555	0	0	0	0	0	0
F2S4_160525_002_H01	ALM	L1	GABAergic	Lamp5	3	Lamp5 Fam19a1 Tmem182	Core	0	1861.790596	0.827462487	22.34148715	0	0	0	0	0	0	0	0	0.827462487	0	0	0	0	0	0
F2S4_160526_009_B01	ALM	L1	GABAergic	Lamp5	3	Lamp5 Fam19a1 Tmem182	Core	1.639053174	331.6350921	0	1276.276071	0.546351058	0	0	0	0	14.2051275	0	0	107.6311584	0	0	0	0	0	0
F2S4_160531_008_A01	ALM	L1	GABAergic	Lamp5	3	Lamp5 Fam19a1 Tmem182	Core	1.166282765	62.39612794	0.583141383	792.489139	0	0	107.2980144	0	0	0	0	0	216.345453	0	0	0	0	0	0
F2S4_160531_012_F01	ALM	L1	GABAergic	Lamp5	3	Lamp5 Fam19a1 Tmem182	Core	2.2605524	6156.049323	2.2605524	2136.787156	0	0.5651381	0	0	0	0	0	0	166.1506014	0	0	0	0	0	0
F2S4_160531_019_G01	ALM	L1	GABAergic	Lamp5	3	Lamp5 Fam19a1 Tmem182	Core	1.240640146	1867.783739	1.240640146	526.0314217	0.620320073	0.620320073	0.620320073	0	0	0	0	0	96.76993135	0	0	4.342240509	0	0	0
F2S4_160531_020_B01	ALM	L1	GABAergic	Lamp5	3	Lamp5 Fam19a1 Tmem182	Core	0	589.9740677	3.626889761	12.08963254	12.69411416	317.3528541	0	0	0	0	0	0	108.2022112	0	0	0	0	0	0
F2S4_160531_020_D01	ALM	L1	GABAergic	Lamp5	3	Lamp5 Fam19a1 Tmem182	Core	2.422493824	2638.701398	0	107.8009752	2821.599682	0	0	0	0	0	0	0	0	0	0	0	0	0	0
F2S4_160601_001_A01	ALM	L1	GABAergic	Lamp5	3	Lamp5 Fam19a1 Tmem182	Core	5.779862381	1.155972476	2.311944953	1622.985357	8.669793572	0.577986238	1.733958714	0	0	1.733958714	0	0	0	48.550844	0	0	0	0	0
F2S4_160601_015_F01	ALM	L1	GABAergic	Lamp5	3	Lamp5 Fam19a1 Tmem182	Core	1.985127425	5860.09616	0.992563713	851.1233836	1488.845569	0.496281856	0	0	0	0	0	0	220.3491442	0	0	0	0	0	2.977691138
F2S4_160601_016_B01	ALM	L1	GABAergic	Lamp5	3	Lamp5 Fam19a1 Tmem182	Core	3.598751542	1.542322089	0.514107363	668.8536794	0	0	0	0	0	0.514107363	0	0	0	0	0	0	0	0	0
F2S4_160602_001_E01	ALM	L1	GABAergic	Lamp5	3	Lamp5 Fam19a1 Tmem182	Core	8.833026967	4.184065405	0	0	0	0	0	0	0	0	0	0	0	0	0	0	0	0	0
F2S4_160602_001_G01	ALM	L1	GABAergic	Lamp5	3	Lamp5 Fam19a1 Tmem182	Core	0	0	0	809.9620752	835.4984704	0	0	0	0	0	0	0	0	0	0	0	0	0	0
F2S4_160602_002_B01	ALM	L1	GABAergic	Lamp5	3	Lamp5 Fam19a1 Tmem182	Core	1.24644141	3935.638751	0	0	229.3452194	0	127.7602445	0	0	0	0	0	0	0	0	0	0	0	0
F2S4_160613_004_H01	ALM	L1	GABAergic	Lamp5	3	Lamp5 Fam19a1 Tmem182	Core	0	49.71293885	2.485646942	466.0588017	16.77811686	0	0	0	0	0.621411736	0	0	0	0	0	0	0	0	22.37082248
F2S4_160613_006_G01	ALM	L1	GABAergic	Lamp5	3	Lamp5 Fam19a1 Tmem182	Core	0	18.94357971	0	544.9436429	2714.614972	0	0	0	0	0	0	0	0	0	0	0	0	0	0
F2S4_160620_007_F01	ALM	L2/3	GABAergic	Lamp5	3	Lamp5 Fam19a1 Tmem182	Core	0	26.33540403	0.612451257	848.8574416	790.0621209	0	0	0	0	0	0	0	0	0	0	0	0	0	11.63657387
F2S4_160629_013_D01	ALM	L1	GABAergic	Lamp5	3	Lamp5 Fam19a1 Tmem182	Core	0	18.26755247	0	925.7524169	0	0	0	0	0	0	0	0	46.55279499	0	0	232.1746991	0.589275886	0	0
F2S4_160629_013_F01	ALM	L1	GABAergic	Lamp5	3	Lamp5 Fam19a1 Tmem182	Core	0	1150.168569	0.504017778	909.7520888	62.49820444	0	0	0	0	0	0	0	0	0	0	0	0	0	0
F2S4_160629_013_H01	ALM	L1	GABAergic	Lamp5	3	Lamp5 Fam19a1 Tmem182	Core	0	341.1736267	0	1297.517684	0	0	0	0	0	0	0	0	246.4913334	0	0	84.10326612	0	0	0
F2S4_160629_016_C01	ALM	L1	GABAergic	Lamp5	3	Lamp5 Fam19a1 Tmem182	Core	0	16.83666082	0	455.1510641	0.561222027	0	0	0	0	0	0	0	0	0	0	0	0	0	0
F2S4_160629_016_H01	ALM	L1	GABAergic	Lamp5	3	Lamp5 Fam19a1 Tmem182	Core	0	182.6107353	0	480.6650389	622.8705253	0	87.63216321	0	0	0	0	0	0	18.36602223	0	0	0	0	0
F2S4_160629_017_D01	ALM	L1	GABAergic	Lamp5	3	Lamp5 Fam19a1 Tmem182	Core	0	60.81494297	0	524.5999286	2989.026029	0	0	0	0	0	0	0	0	0	0	0	0	0	0
F2S4_160629_018_H01	ALM	L1	GABAergic	Lamp5	3	Lamp5 Fam19a1 Tmem182	Core	1.211439869	2130.31701	0	26.65167712	0	0	0	0	0	0	0	0	0	0	0	0	0	0	0
F2S4_160630_002_A01	ALM	L1	GABAergic	Lamp5	3	Lamp5 Fam19a1 Tmem182	Core	1.606098033	1131.228381	0	213.6110384	1029.508839	0	0	0	0	1.070732022	0	0	64.24392132	2.676830055	0	26.23293454	0	0	0
F2S4_160630_003_E01	ALM	L1	GABAergic	Lamp5	3	Lamp5 Fam19a1 Tmem182	Core	0.374169717	0	0	509.9933248	71.46641602	0.374169717	0.748339435	0	0	0	0	0	0	0	0	0	0	0	0
F2S4_160630_003_G01	ALM	L1	GABAergic	Lamp5	3	Lamp5 Fam19a1 Tmem182	Core	1.136316505	0.568158253	0	943.1426992	13.63579806	0	0	0	0	0	0	0	0	0	0	0	0	0	0
F2S4_160630_004_A01	ALM	L1	GABAergic	Lamp5	3	Lamp5 Fam19a1 Tmem182	Core	0	1838.464008	0	128.9651822	0	0	0	0	0	1.136257112	0	0	0	0	0	0	0	0	0
F2S4_160707_004_D01	ALM	L1	GABAergic	Lamp5	3	Lamp5 Fam19a1 Tmem182	Core	0	11377.92342	1.277055213	1367.726133	5298.502078	0	0	0	0	0	0	0	0	0	0	0	0	0	0
F2S4_160708_005_A01	ALM	L1	GABAergic	Lamp5	3	Lamp5 Fam19a1 Tmem182	Core	0	494.1328749	0	1331.847395	1.2493878	0	0	0	0	0	0	0	0	0	0	0	0	0	24.987756
F2S4_160721_004_F01	ALM	L1	GABAergic	Lamp5	3	Lamp5 Fam19a1 Tmem182	Core	2.717690398	2.038267798	0	678.0637543	1294.979475	0	0	0	0	0	0	0	0	0	0	0	0	0	0
F2S4_160721_005_F01	ALM	L1	GABAergic	Lamp5	3	Lamp5 Fam19a1 Tmem182	Core	6.4576076	1465.159413	0	863.8843945	0	0.717511956	0	0	0	0.717511956	0.717511956	0	0	0	0	0	0	0	0
F2S4_160721_006_A01	ALM	L1	GABAergic	Lamp5	3	Lamp5 Fam19a1 Tmem182	Core	0	0	0	854.9383829	0	0	0.707145064	0	0	0	0	0	0	0	0	0.707145064	0	0	0
F2S4_160819_001_C01	ALM	L1	GABAergic	Lamp5	3	Lamp5 Fam19a1 Tmem182	Core	4.626483728	3528.850463	0	138.2162014	3778.680585	0.578310466	0	0	0	0	0	0	0	0	0	0	0	0	0
F2S4_160819_005_G01	ALM	L1	GABAergic	Lamp5	3	Lamp5 Fam19a1 Tmem182	Core	0	70.29202488	3.591563315	580.8070961	1458.174706	0	0	0	0	0	0	0	0	0	0	0	0	0	0
F2S4_160819_005_H01	ALM	L1	GABAergic	Lamp5	3	Lamp5 Fam19a1 Tmem182	Core	0	7.968214791	0	421.3193571	0.498013424	0	0.498013424	0	0	0	0	0	0	5.976161093	0	0	0	0	0
F2S4_160819_010_F01	ALM	L1	GABAergic	Lamp5	3	Lamp5 Fam19a1 Tmem182	Core	0	42.81678927	0	332.1194195	576.2908394	0	0	0.57860526	0	0	0	0	0	0	0	0	0	0	0
F2S4_160819_011_H01	ALM	L1	GABAergic	Lamp5	3	Lamp5 Fam19a1 Tmem182	Intermediate	1.82401646	255.3623044	0	1704.847385	0.608005487	0	0.608005487	1.82401646	0	15.80814265	0.608005487	0	309.4747927	0	0	0	0	0	0
F2S4_160819_012_C01	ALM	L1	GABAergic	Lamp5	3	Lamp5 Fam19a1 Tmem182	Core	1.243351953	53.46413396	0.621675976	426.4697197	3109.623233	0	0	0.621675976	0	0	0	0	0	0	0	45.38234627	0	0	0
F2S4_160819_012_D01	ALM	L1	GABAergic	Lamp5	3	Lamp5 Fam19a1 Tmem182	Core	40.01382547	1357.020598	0	450.5004833	82.09733156	6.209041883	0	0	0	0	0	0	0	0	0	13.10797731	0	0	0
F2S4_160819_012_F01	ALM	L1	GABAergic	Lamp5	3	Lamp5 Fam19a1 Tmem182	Core	0	2.657058742	0	255.9633255	0	0	57.56960608	0.885686247	0	0	0	0	0	0.885686247	0	0	0	0	0
F2S4_160819_015_B01	ALM	L1	GABAergic	Lamp5	3	Lamp5 Fam19a1 Tmem182	Core	0	1099.672254	1.576967859	1375.115973	0	0	0	0	0	0	0	0	0	0.525655953	0	0	0	0	18.92361431
F2S4_160819_018_G01	ALM	L1	GABAergic	Lamp5	3	Lamp5 Fam19a1 Tmem182	Core	0	12.34092209	0	841.0109866	0	0	0	0	0	0	0	0	0	0	0	0	0	0	0
F2S4_160906_006_C01	ALM	L1-L6	GABAergic	Lamp5	3	Lamp5 Fam19a1 Tmem182	Core	0	138.3695032	0	829.7026342	0	0	0	0	0	0	0	0	0	9.258925862	0	0	0	0	0
F2S4_160919_008_G01	ALM	L1-L6	GABAergic	Lamp5	3	Lamp5 Fam19a1 Tmem182	Core	0	21.57063603	0.917899406	670.0665661	0	0	0	0	0	0.458949703	0	0	0	0	0	0	0	0	0
F2S4_160919_009_C01	ALM	L1-L6	GABAergic	Lamp5	3	Lamp5 Fam19a1 Tmem182	Core	0	10.80967141	0.540483571	590.2080592	58.37222563	0	0	0	0	0	0	0	0	0	0	0	0	0	0
F2S4_161019_007_A01	ALM	L1	GABAergic	Lamp5	3	Lamp5 Fam19a1 Tmem182	Intermediate	0	51.82619469	0	1215.447661	0	0	0	0	0	0	0	0	165.3502402	0	0	39.48662452	0	0	0
F2S4_161019_009_H01	ALM	L1	GABAergic	Lamp5	3	Lamp5 Fam19a1 Tmem182	Core	1.103787481	2.759468703	0	857.6428729	25.93900581	0	0.551893741	20.97196214	0	0	0.551893741	0	0	0	0	0	0	0	0
F2S4_161019_011_D01	ALM	L1	GABAergic	Lamp5	3	Lamp5 Fam19a1 Tmem182	Core	4.209418574	14.73296501	0	416.7324388	1769.358941	0.701569762	0.701569762	0	0	0	0	0	0	0	0	0	0	0	18.94238358
F2S4_161019_011_F01	ALM	L1	GABAergic	Lamp5	3	Lamp5 Fam19a1 Tmem182	Core	2.533177019	32.42466585	0	854.1872909	0.506635404	0	0	0	0	0.506635404	0	0	0	0.506635404	0	0	0	0	0
F2S4_161019_013_F01	ALM	L1	GABAergic	Lamp5	3	Lamp5 Fam19a1 Tmem182	Core	1.078326976	135.8691989	0	49.60304088	425.9391554	0.539163488	0.539163488	0	0	0	0.539163488	0	0	0	0	0	0	0	0
F2S4_161020_003_H01	ALM	L1	GABAergic	Lamp5	3	Lamp5 Fam19a1 Tmem182	Core	0.678833628	0	0	841.7536988	0	0	0	0	0	0	0	0	35.29934866	2.036500884	0	0	0	0	0
F2S4_161020_008_A01	ALM	L1	GABAergic	Lamp5	3	Lamp5 Fam19a1 Tmem182	Core	0.475393174	2.37696587	0	918.459612	1.901572696	0	0	0	0	6.180111261	0	0	78.91526687	0	0	0	0	0	0
F2S4_161020_008_E01	ALM	L1	GABAergic	Lamp5	3	Lamp5 Fam19a1 Tmem182	Core	2.933853343	11.24643781	0	774.0483069	0.488975557	0	0	0	0	0	0	0	158.4280805	0	0	0	0	0	0
F1S4_160108_005_C01	VISp	L1	GABAergic	Lamp5	3	Lamp5 Fam19a1 Tmem182	Core	2.53048443	1.897863322	0	477.6289361	2192.664758	0	0	0.632621107	0	0	0	0	0	0	0	0	0	0	0
F1S4_160108_005_D01	VISp	L1	GABAergic	Lamp5	3	Lamp5 Fam19a1 Tmem182	Core	0.586021855	0	0.586021855	447.7206973	0	0	0.586021855	0	0	0	0	0	0	0	0	0	0	0	0
F1S4_160108_006_A01	VISp	L1	GABAergic	Lamp5	3	Lamp5 Fam19a1 Tmem182	Core	0.64003277	1.280065539	0	379.5394324	0	0	0	0	0	0	0	0	0	0	0	0	0	0	0
F1S4_170426_010_A01	VISp	L2/3	GABAergic	Lamp5	3	Lamp5 Fam19a1 Tmem182	Intermediate	0.515565702	287.170096	0	649.0972187	1973.585507	0	0	0	0	9.795748336	0	0	413.4836929	0	0	129.9225569	0	0	0
F1S4_180130_330_E01	VISp	L1-L4	GABAergic	Lamp5	3	Lamp5 Fam19a1 Tmem182	Core	0	179.1550061	0	273.8806416	2353.726115	0	0	0	0	0	0	0	0	8.237011777	0	218.2808121	0	0	0
F2S4_151223_001_E01	VISp	L2/3	GABAergic	Lamp5	3	Lamp5 Fam19a1 Tmem182	Core	6.230989917	3.560565667	0.890141417	1043.24574	0	0	0	0	0	0	0	0	61.41975776	0	0	0	0	0	0
F2S4_160113_003_G01	VISp	L2/3	GABAergic	Lamp5	3	Lamp5 Fam19a1 Tmem182	Core	4.125427129	11.78693465	0	1202.267335	0	0	0	0	0	0	0	0	0	0	0	0	0	0	0
F2S4_160114_014_F01	VISp	L1	GABAergic	Lamp5	3	Lamp5 Fam19a1 Tmem182	Core	2.605905634	532.2562257	0.651476408	0	1428.036287	0	0	0	0	0	0	0	9.772146126	7.817716901	0	0	0	0	0
F2S4_160115_010_E01	VISp	L2/3	GABAergic	Lamp5	3	Lamp5 Fam19a1 Tmem182	Core	27.12514407	9.370504316	2.465922188	1280.799985	256.949092	0	0	0	0	0.493184438	0	0	0	0	0	0	0	0	0
F2S4_160115_025_F01	VISp	L1	GABAergic	Lamp5	3	Lamp5 Fam19a1 Tmem182	Core	0	45.93234039	0	424.8741486	561.3952714	0	0	0	0	15.9487293	0	0	17.86257682	0.637949172	0	0	0	0	0
F2S4_160115_028_C01	VISp	L1	GABAergic	Lamp5	3	Lamp5 Fam19a1 Tmem182	Core	1.457303202	33.51797365	0.728651601	847.421812	2296.709847	0	0	0	0	0	0	0	0	0	0	0	0	0	32.78932205
F2S4_160115_028_H01	VISp	L1	GABAergic	Lamp5	3	Lamp5 Fam19a1 Tmem182	Core	0.564559017	0.564559017	0	560.0425452	309.9429005	0	0	0	0	0	0.564559017	0	0	0	0	0	0	0	0
F2S4_160119_006_A01	VISp	L1	GABAergic	Lamp5	3	Lamp5 Fam19a1 Tmem182	Core	0.496075054	172.1380438	0	904.8408988	1623.157577	0	0	0	0	0	0	0	0	0	0	0	0	0	0
F2S4_160119_006_C01	VISp	L1	GABAergic	Lamp5	3	Lamp5 Fam19a1 Tmem182	Core	0	0	0	424.5481413	0	1.693676096	0	0	0	0	0	0	0	7.339263082	0	0	0	0	0
F2S4_160121_002_F01	VISp	L2/3	GABAergic	Lamp5	3	Lamp5 Fam19a1 Tmem182	Core	3.446214075	1.723107038	3.446214075	62.03185336	1244.083281	0	384.2528694	0	0	0	0	0	0	0	0	0	0	0	0
F2S4_160121_002_G01	VISp	L2/3	GABAergic	Lamp5	3	Lamp5 Fam19a1 Tmem182	Core	2.316168594	0.579042148	0	1385.068819	39.3748661	0	0	0	0	0	0	0	0	0	0	4.053295039	0	0	0
F2S4_160127_001_E01	VISp	L2/3	GABAergic	Lamp5	3	Lamp5 Fam19a1 Tmem182	Core	0	91.69668205	0	283.0370919	970.1508961	0	0	0	0	0	0	0	0	0	0	0	0	0	0
F2S4_160304_003_A01	VISp	L1	GABAergic	Lamp5	3	Lamp5 Fam19a1 Tmem182	Core	1.097337694	0.548668847	0	1453.423776	0	0	0	0	0.548668847	0	0	0	93.82237285	0	0	0	0	0	0
F2S4_160304_004_G01	VISp	L1	GABAergic	Lamp5	3	Lamp5 Fam19a1 Tmem182	Core	2.384980348	0	0	1163.075416	1167.050384	0	0	0	0	50.0845873	0	0	81.88432527	0	0	262.3478383	0	0	0
F2S4_160330_004_G01	VISp	L2/3	GABAergic	Lamp5	3	Lamp5 Fam19a1 Tmem182	Core	5.849197783	2.249691455	0	808.0891706	53.54265662	0	53.54265662	0	0	28.34611233	0	0	0	6.749074364	0	0	0	0	0
F2S4_160330_019_B01	VISp	L2/3	GABAergic	Lamp5	3	Lamp5 Fam19a1 Tmem182	Core	0.825729057	85.87582191	0	0	4065.889876	0	0	0.825729057	0	0	0	0	0	0	0	28.07478793	0	0	0
F2S4_160404_002_F01	VISp	L1	GABAergic	Lamp5	3	Lamp5 Fam19a1 Tmem182	Core	2.534414176	12.03846734	0	429.5832029	977.016665	0	0.633603544	1.267207088	0	7.603242529	0	0.633603544	0	0	0	0	0	0	0
F2S4_160404_003_F01	VISp	L1	GABAergic	Lamp5	3	Lamp5 Fam19a1 Tmem182	Core	0.860146612	0.860146612	0	0	711.3412481	0	11.61197926	0	0	0	0	0	0.860146612	0	0	0	0	0	0
F2S4_160404_004_D01	VISp	L1	GABAergic	Lamp5	3	Lamp5 Fam19a1 Tmem182	Core	0	83.98222473	1.447969392	752.9440838	922.3565026	0	0	0	0	1.930625856	0	0	0	0	0	0	0	0	0
F2S4_160404_004_G01	VISp	L1	GABAergic	Lamp5	3	Lamp5 Fam19a1 Tmem182	Core	5.587214219	1560.429114	0	238.6538645	0	0.39908673	0.39908673	0	0	0.39908673	0	0	7.183561139	0	0	765.0492613	0	0	11.17442844
F2S4_160404_019_B01	VISp	L2/3	GABAergic	Lamp5	3	Lamp5 Fam19a1 Tmem182	Core	7.331857593	645.8144563	1.221976266	114.865769	1825.632541	0.610988133	1.221976266	0	0	0	0.610988133	0	136.8613417	0	0	0	0	0	0
F2S4_160404_032_F01	VISp	L1	GABAergic	Lamp5	3	Lamp5 Fam19a1 Tmem182	Core	8.826364232	1.176848564	0.588424282	444.260333	795.5496295	0.588424282	1.765272846	0	0	4.707394257	0	0	28.83278983	0	0	0	0	0	0
F2S4_160404_034_E01	VISp	L1	GABAergic	Lamp5	3	Lamp5 Fam19a1 Tmem182	Core	33.61933263	0	1.084494601	313.961187	0.542247301	0.542247301	3.795731104	0	0.542247301	4.337978404	0	0	0.542247301	0	0	0	0	0	0
F2S4_160404_036_E01	VISp	L1	GABAergic	Lamp5	3	Lamp5 Fam19a1 Tmem182	Core	37.3015248	0	4.144613867	243.1506802	4.144613867	1.381537956	0	0	1.381537956	0	0	0	19.34153138	0	0	0	0	0	0
F2S4_160404_044_B01	VISp	L2/3	GABAergic	Lamp5	3	Lamp5 Fam19a1 Tmem182	Core	11.29443351	1.613490502	0.537830167	703.4818587	3038.202615	2.151320669	0	0	0	0.537830167	0	0	1.075660334	0	0	0	0	0	0
F2S4_160405_009_F01	VISp	L1	GABAergic	Lamp5	3	Lamp5 Fam19a1 Tmem182	Core	2.658321663	11.69661532	0	745.3933944	1.063328665	0	0.531664333	0	0	0	0	0	0	0	0	0	0	0	0
F2S4_160405_043_F01	VISp	L1	GABAergic	Lamp5	3	Lamp5 Fam19a1 Tmem182	Core	1.03668894	231.6999781	0	110.9257166	100.0404827	0.51834447	0	0	0	0	0	0	0	0	0	0	0	0	0
F2S4_160413_006_F01	VISp	L1	GABAergic	Lamp5	3	Lamp5 Fam19a1 Tmem182	Core	0	22.86154534	1.143077267	185.1785172	2411.321494	0	0	0	0	0	0	0	0	0	0	0	0	0	0
F2S4_160414_002_H01	VISp	L1	GABAergic	Lamp5	3	Lamp5 Fam19a1 Tmem182	Core	0.5382986	3158.197884	1.076597199	44.14048517	1472.24667	0	0	0	0	0	26.91492998	0	0	0	0	0	0	0	0
F2S4_160415_018_A01	VISp	L1	GABAergic	Lamp5	3	Lamp5 Fam19a1 Tmem182	Intermediate	1.545694198	0	1.545694198	1328.910587	1443.678381	0	0	0	0	12.75197714	0	0	165.7757028	0	0	0	0	0	0
F2S4_160415_018_G01	VISp	L1	GABAergic	Lamp5	3	Lamp5 Fam19a1 Tmem182	Core	1.432598394	742.0859683	0	0.955065596	2522.805773	0	0	0	0	0	0	0	0	0	0	0	0	0	0
F2S4_160415_019_C01	VISp	L1	GABAergic	Lamp5	3	Lamp5 Fam19a1 Tmem182	Core	0	1054.796394	1.67427999	1296.450805	1099.44386	0	0	0	0	0	0.55809333	0.55809333	105.4796394	0	0	8.929493279	0	0	0
F2S4_160415_020_C01	VISp	L1	GABAergic	Lamp5	3	Lamp5 Fam19a1 Tmem182	Core	0	479.1985457	0.523142517	132.3550568	2642.392854	0	0	0	0	0	0	0	53.88367926	0	0	0	0	0	0
F2S4_160415_022_G01	VISp	L1	GABAergic	Lamp5	3	Lamp5 Fam19a1 Tmem182	Core	0	21.89242623	1.122688525	848.1911804	1894.536885	0	0.561344262	0	0	0	0	0	0	0	0	0	0	0	0
F2S4_160429_021_C01	VISp	L2/3	GABAergic	Lamp5	3	Lamp5 Fam19a1 Tmem182	Core	8.519091284	60.134762	0.501123017	936.5989182	1785.501308	1.002246033	1.50336905	0	0	0	0	0	0.501123017	0	0	0	0	0	0
F2S4_160504_009_F01	VISp	L1	GABAergic	Lamp5	3	Lamp5 Fam19a1 Tmem182	Core	1.499371014	103.9563903	0	0	2472.962592	0	0	0	0	0	0	0	0.499790338	0	0	0	0	0	0
F2S4_160504_010_B01	VISp	L1	GABAergic	Lamp5	3	Lamp5 Fam19a1 Tmem182	Core	2.374300946	0.474860189	0	664.804265	0.474860189	0	0	0	0	0	0	0	0	0	0	0	0	0	0
F2S4_160504_010_D01	VISp	L1	GABAergic	Lamp5	3	Lamp5 Fam19a1 Tmem182	Core	0.999142236	199.3288762	0.999142236	756.3506729	2661.714918	0	0.499571118	0	0	0.499571118	0	0	0	0	0	0	0	0	0
F2S4_170707_022_F01	VISp	L1	GABAergic	Lamp5	3	Lamp5 Fam19a1 Tmem182	Intermediate	0.587834875	0.587834875	0	1489.573573	0.587834875	0	0	0	0	5.290513873	0	0	5.290513873	0	0	0	0	0	0
F2S4_170707_022_G01	VISp	L1	GABAergic	Lamp5	3	Lamp5 Fam19a1 Tmem182	Core	1.731031216	0	0.577010405	834.9340564	1629.477384	0	0.577010405	0	0	0	0	0	1.731031216	0	0	0	0	0	0
F2S4_171122_007_A01	VISp	L1-L4	GABAergic	Lamp5	3	Lamp5 Fam19a1 Tmem182	Core	0	137.5035808	0	40.62605797	3396.963463	0	0	0	0	0	0	0	0	0	0	0	0	0	0
F2S4_160307_007_F01	ALM	L5	GABAergic	Lamp5	4	Lamp5 Ntn1 Npy2r	Intermediate	3.596362741	4178.973506	0.513766106	31.33973246	841.5488815	0.513766106	0	0	0	4.110128847	0	0	330.3516061	0	0	0	0	0	0
F2S4_160307_009_H01	ALM	L2/3	GABAergic	Lamp5	4	Lamp5 Ntn1 Npy2r	Core	8.921139188	4663.697071	0	0	2665.361893	0	0	0	0	0	0	0	0	0	0	0	0	0	0
F2S4_160307_011_A01	ALM	L1	GABAergic	Lamp5	4	Lamp5 Ntn1 Npy2r	Intermediate	0.926714491	2269.523789	0	56.52958397	0	0	0.463357246	0	0	0	0	0	0	0	0	1.853428983	0	0	0
F2S4_160420_032_G01	ALM	L2/3	GABAergic	Lamp5	4	Lamp5 Ntn1 Npy2r	Core	1.330008902	3131.284292	0.886672601	1.773345203	0	0	0	0	0	0	0	0	466.3897884	0	0	0	0	0	0
F2S4_160503_003_C01	ALM	L1	GABAergic	Lamp5	4	Lamp5 Ntn1 Npy2r	Core	0.522216391	1330.085147	0	0	0	0	864.7903432	1.044432782	0	0.522216391	0	0.522216391	28.72190149	0	0	0	0	0	0
F2S4_160503_004_C01	ALM	L5	GABAergic	Lamp5	4	Lamp5 Ntn1 Npy2r	Intermediate	0.600899426	883.923056	0	0	1284.722973	0	37.85666385	1.201798853	0	0.600899426	0	0	0	0	0	0	0	0	0
F2S4_160505_001_E01	ALM	L1	GABAergic	Lamp5	4	Lamp5 Ntn1 Npy2r	Intermediate	3.996174329	2678.768859	0	228.2259561	0	0	0	0	0	0	0	0	0	5.328232439	0	0	0	0	0
F2S4_160505_001_H01	ALM	L1	GABAergic	Lamp5	4	Lamp5 Ntn1 Npy2r	Core	0	12559.20152	0.469713573	32.41023656	0	0	0	0	0	0	0	0	187.4157158	0	0	51.66849307	0	0	0
F2S4_160505_003_B01	ALM	L1	GABAergic	Lamp5	4	Lamp5 Ntn1 Npy2r	Core	1.870788388	1459.214942	0	0	0	27.12643162	399.8810179	0	0	0	0	0	0	0	0	0	0	0	0
F2S4_160505_004_A01	ALM	L1	GABAergic	Lamp5	4	Lamp5 Ntn1 Npy2r	Core	0.747229739	5130.479389	0	31.38364904	0.37361487	0	0	0	0.37361487	0	0	0	0	0	0	54.54777096	0	0	0
F2S4_160505_004_H01	ALM	L1	GABAergic	Lamp5	4	Lamp5 Ntn1 Npy2r	Core	1.525963894	965.935145	0	0	0.762981947	0.762981947	0	0	0	0	0	0	107.5804545	0	0	148.0184977	0	0	0
F2S4_160505_020_F01	ALM	L2/3	GABAergic	Lamp5	4	Lamp5 Ntn1 Npy2r	Core	3.645228833	2342.424048	0	0	0	0	0	0.729045767	0	0	0	0	60.51079863	0	0	0	0	0	0
F2S4_160505_023_B01	ALM	L2/3	GABAergic	Lamp5	4	Lamp5 Ntn1 Npy2r	Core	1.661947428	2915.055789	0.830973714	0	3937.984432	0	130.0473863	0	0	0	0	0	0	0	0	0	0	0	0
F2S4_160506_013_A01	ALM	L1	GABAergic	Lamp5	4	Lamp5 Ntn1 Npy2r	Core	2.161611438	4864.706541	0.360268573	0	0.720537146	1.080805719	0	0	0	0	0	0	368.1944816	0	0	0	0	0	0
F2S4_160523_001_D01	ALM	L1	GABAergic	Lamp5	4	Lamp5 Ntn1 Npy2r	Core	0.76260287	3054.605797	2.669110046	0.76260287	0	0	0	0	0	0.381301435	0	0	129.2611865	1.143904306	0	0	0	0	0
F2S4_160524_001_D01	ALM	L1	GABAergic	Lamp5	4	Lamp5 Ntn1 Npy2r	Core	0.349044038	2050.982768	4.886616535	0	2229.693316	444.3330606	1149.402018	0	0	0	0	0.349044038	0	0	0	0	0	0	0
F2S4_160524_002_F01	ALM	L2/3	GABAergic	Lamp5	4	Lamp5 Ntn1 Npy2r	Core	0.394507353	3511.115442	2.367044118	0	3911.145898	0	306.9267207	0	0	0	0	0	0	0	0	0	0	0	0
F2S4_160524_008_G01	ALM	L1	GABAergic	Lamp5	4	Lamp5 Ntn1 Npy2r	Intermediate	2.121604725	9641.986275	0	0.707201575	439.1721781	0	0	0	0	0	0.707201575	0	482.3114742	0	0	29.70246615	0	0	0
F2S4_160524_013_B01	ALM	L2/3	GABAergic	Lamp5	4	Lamp5 Ntn1 Npy2r	Core	1.550894944	3331.32234	0	0	0	1065.464826	0	0	0	8.917645928	23.65114789	0	466.4316544	0	0	0	0	0	0
F2S4_160525_001_E01	ALM	L1	GABAergic	Lamp5	4	Lamp5 Ntn1 Npy2r	Intermediate	2.086216659	289.5668722	0.834486663	8.762109966	0.417243332	0.834486663	111.4039696	0	0	0	0	0	0	0	0	0	0	0	0
F2S4_160525_022_A01	ALM	L1	GABAergic	Lamp5	4	Lamp5 Ntn1 Npy2r	Intermediate	6.22433327	1332.698912	0	113.421184	0	0	0.691592586	0	0	0	0	0	0	0	0	0	0	0	0
F2S4_160525_022_E01	ALM	L1	GABAergic	Lamp5	4	Lamp5 Ntn1 Npy2r	Core	3.992911783	4773.126745	0.798582357	1.597164713	3556.885816	0	0	0	0	0	0	0	78.26107095	0	0	0	0	0	0
F2S4_160526_007_H01	ALM	L1	GABAergic	Lamp5	4	Lamp5 Ntn1 Npy2r	Core	5.520303677	2750.114923	0	0	1813.168835	1.003691578	205.2549276	0	0	0.501845789	0	0	0	0	0	2.007383155	0	0	0
F2S4_160526_009_A01	ALM	L1	GABAergic	Lamp5	4	Lamp5 Ntn1 Npy2r	Core	1.619968378	2352.194085	0.539989459	0	16.73967324	0	0	0	0	0	0	0	64.25874567	9.17982081	0	0	0	0	0
F2S4_160526_022_E01	ALM	L2/3	GABAergic	Lamp5	4	Lamp5 Ntn1 Npy2r	Core	47.92705401	560.9987796	0.504495305	0.504495305	1168.915623	2.017981222	193.7261973	0	0.504495305	0	0	0	204.825094	0	0	96.86309864	0	0	0
F2S4_160531_002_D01	ALM	L2/3	GABAergic	Lamp5	4	Lamp5 Ntn1 Npy2r	Core	1.207154321	9956.005261	1.810731481	0	1638.108413	0	0	0	0	0	0	0	92.9508827	0	0	0	0	0	0
F2S4_160531_010_D01	ALM	L1	GABAergic	Lamp5	4	Lamp5 Ntn1 Npy2r	Core	2.128704678	4224.414433	0.532176169	0	0.532176169	0	0	0	0	0	0	0	226.7070482	0	0	26.60880847	0	0	0
F2S4_160531_010_G01	ALM	L1	GABAergic	Lamp5	4	Lamp5 Ntn1 Npy2r	Intermediate	0	549.9838421	0.560065012	787.4514074	0	0	0	0	0	0	0	0	0	0	0	81.7694918	0	0	0
F2S4_160531_010_H01	ALM	L1	GABAergic	Lamp5	4	Lamp5 Ntn1 Npy2r	Intermediate	2.918382189	1343.62316	0	0	33.85323339	0	0.583676438	0	0	0	0	0	0	0	0	48.44514434	0	0	0
F2S4_160531_011_A01	ALM	L1	GABAergic	Lamp5	4	Lamp5 Ntn1 Npy2r	Core	0	4039.132989	0	0	0	0	7.629864699	0	0	0	0	0	252.3724477	0	0	0	0	0	0
F2S4_160531_011_E01	ALM	L1	GABAergic	Lamp5	4	Lamp5 Ntn1 Npy2r	Core	3.381342765	6554.73295	1.690671383	207.95258	581.5909556	0	0	0	0	0	0	0	0	28.7414135	0	0	0	0	0
F2S4_160531_012_C01	ALM	L1	GABAergic	Lamp5	4	Lamp5 Ntn1 Npy2r	Core	0	5158.952405	0	174.6032609	0	0.604163533	0	0	0	12.68743418	0	0	215.6863811	0	0	139.561776	0	0	0
F2S4_160531_018_D01	ALM	L1	GABAergic	Lamp5	4	Lamp5 Ntn1 Npy2r	Intermediate	3.478660159	3561.452271	1.391464064	1513.217169	0	0	0	0	0	17.3933008	0	0	287.3373292	0	0	43.13538597	0	0	0
F2S4_160531_020_C01	ALM	L1	GABAergic	Lamp5	4	Lamp5 Ntn1 Npy2r	Core	0.57092909	1862.370692	3.99650363	0	0	0	0	0	0	0	0	0	145.0159889	7.993007261	0	0	0	0	0
F2S4_160531_023_E01	ALM	L2/3	GABAergic	Lamp5	4	Lamp5 Ntn1 Npy2r	Core	5.21845574	8861.68334	0	1.490987354	0.745493677	0	1.490987354	0	0	0	0	0	259.4317996	0	0	46.22060798	0	0	0
F2S4_160601_015_B01	ALM	L1	GABAergic	Lamp5	4	Lamp5 Ntn1 Npy2r	Intermediate	0.680242956	3939.967199	0	187.0668128	0	0	0	0	0	0	0	0	0	0	0	0	0	0	0
F2S4_160601_015_H01	ALM	L1	GABAergic	Lamp5	4	Lamp5 Ntn1 Npy2r	Core	3.266427818	4081.401559	0	0	0	0	0	0	0	0	0	0	316.2990937	0	0	59.34010536	0	0	0
F2S4_160601_017_F01	ALM	L1	GABAergic	Lamp5	4	Lamp5 Ntn1 Npy2r	Core	2.039992003	4774.601284	1.529994002	0	0	0	0	0	0	0	0	0	145.3494302	0	0	74.96970612	0	0	0
F2S4_160602_002_H01	ALM	L1	GABAergic	Lamp5	4	Lamp5 Ntn1 Npy2r	Core	1.165344292	3646.36229	0	1.165344292	2262.515943	0	61.76324749	0	0	0	0	0	127.6052	0	0	351.3513041	0	0	0
F2S4_160613_003_A01	ALM	L1	GABAergic	Lamp5	4	Lamp5 Ntn1 Npy2r	Core	1.140688531	4548.495517	1.140688531	0	0	0	0	0	0	0	0	0	28.51721328	0	0	118.6316072	0	0	0
F2S4_160613_003_F01	ALM	L1	GABAergic	Lamp5	4	Lamp5 Ntn1 Npy2r	Intermediate	1.713474017	1811.713194	1.142316011	0	1465.020285	0	119.9431812	0	0	0	0	0	0	0	0	15.42126615	0	0	0
F2S4_160613_004_D01	ALM	L1	GABAergic	Lamp5	4	Lamp5 Ntn1 Npy2r	Intermediate	0.578928843	2248.559625	0	51.524667	0.578928843	0	0	0	0	6.36821727	0	0	0	0	0	0	0	0	0
F2S4_160613_005_D01	ALM	L1	GABAergic	Lamp5	4	Lamp5 Ntn1 Npy2r	Core	0.62611958	5904.93376	0	0	0	0	0	0	0	0	0	0	77.63882793	30.67985942	0	0	0	0	0
F2S4_160613_005_F01	ALM	L1	GABAergic	Lamp5	4	Lamp5 Ntn1 Npy2r	Intermediate	5.098980777	2814.000017	0	0.637372597	1500.375094	0	0	0	0	0	0	0	0	5.736353375	0	0	0	0	0
F2S4_160613_006_A01	ALM	L1	GABAergic	Lamp5	4	Lamp5 Ntn1 Npy2r	Core	2.169898731	2503.339836	0	0	0	0.723299577	0	0	0	0	0	0	35.44167927	1.446599154	0	8.679594923	0	0	0
F2S4_160613_007_G01	ALM	L1	GABAergic	Lamp5	4	Lamp5 Ntn1 Npy2r	Intermediate	2.133910343	585.7583891	0	19.20519308	1894.378907	163.7776188	259.2701066	0	0	0	0	0	99.76030852	9.602596542	0	0	0	0	0
F2S4_160613_018_F01	ALM	L2/3	GABAergic	Lamp5	4	Lamp5 Ntn1 Npy2r	Core	3.762829906	897.7037062	0	0	36.01565767	128.4737639	0	0	0	0	0	0	269.848659	0	0	0	0	0	0
F2S4_160620_002_C01	ALM	L2/3	GABAergic	Lamp5	4	Lamp5 Ntn1 Npy2r	Core	7.620350739	6496.349005	0	0.846705638	2807.252542	0	0	0	0	0	0	0	286.6098584	0	0	0	0	0	0
F2S4_160620_002_H01	ALM	L2/3	GABAergic	Lamp5	4	Lamp5 Ntn1 Npy2r	Core	1.015930467	12056.3855	0	82.29036783	64.6809064	20.31860934	28.10740959	0	0	33.18706192	0	0	552.6661741	0	0	0	0	0	0
F2S4_160620_006_D01	ALM	L2/3	GABAergic	Lamp5	4	Lamp5 Ntn1 Npy2r	Core	0	5545.875342	0	0	114.928432	0	25.45394802	0.771331758	0	0	0	0.771331758	35.48126088	0	0	155.0376834	0	0	0
F2S4_160620_016_H01	ALM	L2/3	GABAergic	Lamp5	4	Lamp5 Ntn1 Npy2r	Core	4.976169126	2204.94054	0.995233825	0	0	0	0.497616913	0	0	0	0	0	0.497616913	0	0	0	0	0	0
F2S4_160620_028_A01	ALM	L2/3	GABAergic	Lamp5	4	Lamp5 Ntn1 Npy2r	Core	0.450732666	2934.269655	0	0.450732666	16.67710864	62.65184057	0.450732666	0	0	0	23.8888313	0	151.8969084	1.802930664	0	0	0	0	0
F2S4_160623_026_A01	ALM	L2/3	GABAergic	Lamp5	4	Lamp5 Ntn1 Npy2r	Core	0.679122221	5500.88999	0	1.358244442	0	0	146.6903997	0	0	0	0	0	143.2947886	31.23962216	0	0	0	0	0
F2S4_160623_026_F01	ALM	L2/3	GABAergic	Lamp5	4	Lamp5 Ntn1 Npy2r	Core	0.980998067	4417.434298	0	0	784.3079549	0	0	0	0	0	0	0	85.34683187	0	0	89.76132317	0	0	0
F2S4_160623_027_A01	ALM	L2/3	GABAergic	Lamp5	4	Lamp5 Ntn1 Npy2r	Core	0	3761.263491	0	0	27.80765556	0	10.56690911	0	0	0	0	0	0	0	0	0	0	0	0
F2S4_160623_027_E01	ALM	L2/3	GABAergic	Lamp5	4	Lamp5 Ntn1 Npy2r	Core	0.921939392	7511.962164	0	0.921939392	0.921939392	0	0	0	0	0	0	0	85.74036343	0	0	2.765818175	0	0	0
F2S4_160623_030_B01	ALM	L2/3	GABAergic	Lamp5	4	Lamp5 Ntn1 Npy2r	Core	0	291.4302534	0	0.969817815	0	114.4385022	1563.831226	0	0	0	0	0	42.67198385	0	0	0	0	0	0
F2S4_160629_013_E01	ALM	L1	GABAergic	Lamp5	4	Lamp5 Ntn1 Npy2r	Core	0	2264.526158	0	1.126069696	878.8973976	0	748.2733129	0	0	0	0	0	0.563034848	69.81632114	0	0	0	0	0
F2S4_160629_015_C01	ALM	L1	GABAergic	Lamp5	4	Lamp5 Ntn1 Npy2r	Core	0	7864.370096	0	0.580567702	1975.671891	45.86484848	0	0	0	0	0	0	0	0	0	84.18231684	0	0	0
F2S4_160629_016_F01	ALM	L1	GABAergic	Lamp5	4	Lamp5 Ntn1 Npy2r	Core	0	3938.254492	0	0.513194487	1437.457758	0	0	0	0	0	0	0	11.8034732	0	0	41.56875344	0	0	0
F2S4_160629_019_H01	ALM	L1	GABAergic	Lamp5	4	Lamp5 Ntn1 Npy2r	Intermediate	0	1567.982966	0	0	0	0	0	0	0	0	0	0	0	0	0	0	0	0	0
F2S4_160630_004_B01	ALM	L1	GABAergic	Lamp5	4	Lamp5 Ntn1 Npy2r	Core	0	8326.742834	0	0	0	0	1.032454164	0	0	0	0	0	115.6348664	0	0	0	0	0	0
F2S4_160707_007_C01	ALM	L1	GABAergic	Lamp5	4	Lamp5 Ntn1 Npy2r	Core	0	3693.16365	0	0	0	0	134.6658074	0	0	0	0	0	348.0403973	0	0	0	0	0	0
F2S4_160708_004_B01	ALM	L1	GABAergic	Lamp5	4	Lamp5 Ntn1 Npy2r	Intermediate	10.18499775	1730.813056	0	0.63656236	28.64530618	5.729061236	14.00437191	0	0	0	0	0	14.64093427	0	0	0	0	0	0
F2S4_160708_004_D01	ALM	L1	GABAergic	Lamp5	4	Lamp5 Ntn1 Npy2r	Core	0	4367.117709	1.271914288	0.635957144	120.1959002	10.81127145	281.7290148	0	0	0	0	0	115.1082431	0	0	50.87657153	0	0	0
F2S4_160708_005_C01	ALM	L1	GABAergic	Lamp5	4	Lamp5 Ntn1 Npy2r	Core	0	1968.581637	0	0	0	0	83.94685886	0	0	0	0.555939463	0	21.12569958	0	0	112.2997715	0	0	0
F2S4_160708_005_F01	ALM	L1	GABAergic	Lamp5	4	Lamp5 Ntn1 Npy2r	Core	1.016651222	4069.146516	0	0.508325611	0	0	0	0	0	0	0	0	146.9061016	0	0	0	0	0	0
F2S4_160721_003_B01	ALM	L1	GABAergic	Lamp5	4	Lamp5 Ntn1 Npy2r	Intermediate	1.617245443	526.6829326	0	64.1507359	0	0.539081814	0	0	0	5.390818143	0	0	3.7735727	0	0	51.75185417	0	0	0
F2S4_160721_004_A01	ALM	L1	GABAergic	Lamp5	4	Lamp5 Ntn1 Npy2r	Core	0	188.966477	0	0	164.8305718	236.0609261	216.0457852	0	0	0	0	0	0	0	0	0	0	0	0
F2S4_160721_004_C01	ALM	L1	GABAergic	Lamp5	4	Lamp5 Ntn1 Npy2r	Intermediate	2.096606014	13548.96693	0.698868671	369.0026585	0	0	0	0	0	0	0	0	54.51175637	0	0	110.4212501	0	0	0
F2S4_160721_004_H01	ALM	L1	GABAergic	Lamp5	4	Lamp5 Ntn1 Npy2r	Core	0	1566.063851	0.649819025	0.649819025	263.8265243	0	333.35716	0	0	0	0	0	0.649819025	0	0	0	0	0	0
F2S4_160725_002_C01	ALM	L1	GABAergic	Lamp5	4	Lamp5 Ntn1 Npy2r	Core	0.536865479	2001.97137	0	0	0	0	417.6813424	0	0	0	0	0	98.2463826	0	0	0	0	0	0
F2S4_160725_002_F01	ALM	L1	GABAergic	Lamp5	4	Lamp5 Ntn1 Npy2r	Core	1.940866959	5162.059156	0	1.293911306	0	0	0	0	0	0	0	0	110.6294167	0	0	0	0	0	0
F2S4_160819_001_A01	ALM	L1	GABAergic	Lamp5	4	Lamp5 Ntn1 Npy2r	Core	1.147352141	2055.48136	0	0	0	0	1029.17487	0	0	0	0	0	100.9669884	6.884112844	0	0	0	0	0
F2S4_160819_001_D01	ALM	L1	GABAergic	Lamp5	4	Lamp5 Ntn1 Npy2r	Intermediate	0.61491085	4954.33672	0	996.7704882	0	0	0.61491085	0	0	0	0	0	286.5484562	1.2298217	0	297.0019407	0	0	0
F2S4_160819_002_D01	ALM	L1	GABAergic	Lamp5	4	Lamp5 Ntn1 Npy2r	Core	1.195154366	2344.892866	0	1.195154366	0	0	0	0	0	0	0	0	162.5409938	0	0	0	0	0	0
F2S4_160819_002_H01	ALM	L1	GABAergic	Lamp5	4	Lamp5 Ntn1 Npy2r	Core	0	1128.043319	0	0	0	0	0	0	0	0	0	0	0	0	0	0	0	0	0
F2S4_160819_004_C01	ALM	L1	GABAergic	Lamp5	4	Lamp5 Ntn1 Npy2r	Core	7.045401851	6037.268895	0.640491077	183.8209392	0.640491077	0.640491077	1.280982155	0	0	0	0	0	108.8834831	0	0	78.13991143	0	0	0
F2S4_160819_004_D01	ALM	L1	GABAergic	Lamp5	4	Lamp5 Ntn1 Npy2r	Core	3.382496034	16315.46962	2.818746695	0	0	0	0	0	0	0	0	0	199.0035167	0	0	0	0	0	0
F2S4_160819_007_F01	ALM	L1	GABAergic	Lamp5	4	Lamp5 Ntn1 Npy2r	Core	0	3429.321269	0	0.762919081	0	0	0.762919081	0	0	0	0	0	93.83904696	0	0	0	0	0	0
F2S4_160819_008_A01	ALM	L1	GABAergic	Lamp5	4	Lamp5 Ntn1 Npy2r	Intermediate	0.534787385	7681.151205	0	339.0552018	0	0	0	0.534787385	0	0	0	0	82.89204461	0	0	111.7705634	0	0	0
F2S4_160819_008_F01	ALM	L1	GABAergic	Lamp5	4	Lamp5 Ntn1 Npy2r	Intermediate	0	10.29791879	0	0.572106599	1907.975509	315.2307363	56.06644675	0	0	0	0	0	129.2960915	0	0	0	0	0	0
F2S4_160819_010_A01	ALM	L1	GABAergic	Lamp5	4	Lamp5 Ntn1 Npy2r	Core	0.685867293	4684.473611	0	0	0.685867293	0	0	0	0	0	0	0	34.97923194	0	0	0	0	0	0
F2S4_160819_012_G01	ALM	L1	GABAergic	Lamp5	4	Lamp5 Ntn1 Npy2r	Intermediate	5.115351169	1393.933194	0	0	1608.138524	0	18.54314799	0.639418896	0	0	0	0	0.639418896	0	0	0	0	0	0
F2S4_160819_012_H01	ALM	L1	GABAergic	Lamp5	4	Lamp5 Ntn1 Npy2r	Core	1.052874294	1546.672338	0.526437147	6.843682912	0	0	0	0	0.526437147	0	0	0	0.526437147	0	0	12.10805438	0	0	0
F2S4_160819_016_F01	ALM	L1	GABAergic	Lamp5	4	Lamp5 Ntn1 Npy2r	Intermediate	0	1315.186366	0	0	1622.497239	0	0	0	0	0	0	0	0	4.1669271	0	0	0	0	0
F2S4_160819_016_G01	ALM	L1	GABAergic	Lamp5	4	Lamp5 Ntn1 Npy2r	Core	0	1712.165152	0.485032621	0.970065242	1555.984648	115.9227964	218.2646794	0	0	0	0	0	59.17397975	0	0	0	0	0	0
F2S4_160919_006_G01	ALM	L1-L6	GABAergic	Lamp5	4	Lamp5 Ntn1 Npy2r	Intermediate	0	18.64569008	0	1.130041823	75.14778122	115.8292868	373.4788225	0	0	0	0	0	148.0354788	0	0	0	0	0	0
F2S4_161004_028_D01	ALM	L1-L2/3	GABAergic	Lamp5	4	Lamp5 Ntn1 Npy2r	Core	0	19118.77538	1.648833615	1.09922241	0.549611205	0	146.7461917	0.549611205	0	0	0	0	707.3496209	23.08367061	0	0.549611205	0	0	0
F2S4_161004_028_E01	ALM	L1-L2/3	GABAergic	Lamp5	4	Lamp5 Ntn1 Npy2r	Core	0.494917935	1031.903895	0	1.484753806	843.8350795	0	515.7044885	0	0	0	0	0	9.898358704	0	0	0	0	0	0
F2S4_161004_028_F01	ALM	L1-L2/3	GABAergic	Lamp5	4	Lamp5 Ntn1 Npy2r	Core	0	46319.03747	0	127.8146797	0	0	0.501234038	1.002468076	0	47.61723363	0	0	763.3794402	0	0	0	0	0	0
F2S4_161004_028_H01	ALM	L1-L2/3	GABAergic	Lamp5	4	Lamp5 Ntn1 Npy2r	Core	3.430198883	546.3816792	0	0.980056824	0.490028412	0	0	0	0	0	0	0	454.2563378	0	0	83.30483001	0	0	0
F2S4_161019_002_D01	ALM	L1	GABAergic	Lamp5	4	Lamp5 Ntn1 Npy2r	Core	2.831611831	6279.807139	0	0	1.415805916	0	0.707902958	0	0	0	0	0	0	0	0	0	0	0	0
F2S4_161019_007_E01	ALM	L1	GABAergic	Lamp5	4	Lamp5 Ntn1 Npy2r	Core	0.729805551	4573.691386	0	0	0	0	0	0	0	0	0	0	154.7187767	0	0	0	0	0	0
F2S4_161019_009_C01	ALM	L1	GABAergic	Lamp5	4	Lamp5 Ntn1 Npy2r	Core	1.587494354	6167.415567	0	174.624379	0	0	0	0	0	0	0	0	0	0	0	0	0	0	0
F2S4_161019_011_E01	ALM	L1	GABAergic	Lamp5	4	Lamp5 Ntn1 Npy2r	Core	5.708798743	3907.67274	0	0.570879874	1.141759749	0.570879874	0	0	0	0	0	0	73.07262391	0	0	0	0	0	0
F2S4_161019_012_E01	ALM	L1	GABAergic	Lamp5	4	Lamp5 Ntn1 Npy2r	Core	4.360887683	2313.693187	0	0	0	0	36.34073069	0	0	0	0	0	7.752689214	0	0	0	0	0	0
F2S4_161019_012_H01	ALM	L1	GABAergic	Lamp5	4	Lamp5 Ntn1 Npy2r	Intermediate	1.937996702	5681.721833	0	0	0.484499176	0	0	0	0	0	0	0	85.27185491	0	0	0	0	0	0
F2S4_161020_001_F01	ALM	L1	GABAergic	Lamp5	4	Lamp5 Ntn1 Npy2r	Core	1.085769257	15337.57652	0	21.1725005	58.08865523	0	0.542884628	0	0	0	0	0	213.8965436	0	0	78.17538648	0	0	0
F2S4_161020_002_G01	ALM	L1	GABAergic	Lamp5	4	Lamp5 Ntn1 Npy2r	Core	2.124019367	3259.838723	0	0	0	0	31.32928566	0	0	1.062009683	0	0	0.531004842	4.779043575	0	0	0	0	0
F2S4_161020_002_H01	ALM	L1	GABAergic	Lamp5	4	Lamp5 Ntn1 Npy2r	Intermediate	1.606963509	1579.645129	0	13.39136257	777.2346836	0	1114.69702	0	0	0	0	0	0	0	0	0	0	0	0
F2S4_161020_006_F01	ALM	L1	GABAergic	Lamp5	4	Lamp5 Ntn1 Npy2r	Core	0	4201.478435	0	0	0	0	0.697572378	0.697572378	0	0	0	0.697572378	229.5013125	0	0	0	0	0	0
F2S4_161020_007_D01	ALM	L1	GABAergic	Lamp5	4	Lamp5 Ntn1 Npy2r	Core	3.550563576	543.2362271	0	0	19.27448798	0.507223368	0	0	0	0	0	0	190.7159864	0	0	0	0	0	0
F1S4_160108_005_H01	VISp	L1	GABAergic	Lamp5	4	Lamp5 Ntn1 Npy2r	Core	0.739837591	1047.610029	0	0	0	0.739837591	0	0	0.739837591	0.739837591	0	0	201.2358247	0	0	170.1626459	0	0	0
F1S4_160108_006_G01	VISp	L1	GABAergic	Lamp5	4	Lamp5 Ntn1 Npy2r	Core	0.749876458	1696.220548	0.749876458	0.749876458	2788.790547	0	0	0	0	0	0	0	49.49184622	0	0	0.749876458	0	0	0
F1S4_170426_015_G01	VISp	L2/3	GABAergic	Lamp5	4	Lamp5 Ntn1 Npy2r	Core	5.750470964	8909.779711	0	1.725141289	0.575047096	1.150094193	1.150094193	0	0	0	0	0	0	0	0	0.575047096	0	0	0
F1S4_170426_016_C01	VISp	L2/3	GABAergic	Lamp5	4	Lamp5 Ntn1 Npy2r	Core	0	5159.837413	0	18.62126956	129.1850576	0	0	0	0	0	0	0	712.2635608	0	0	29.09573369	0	0	0
F1S4_180108_301_E01	VISp	L1-L4	GABAergic	Lamp5	4	Lamp5 Ntn1 Npy2r	Intermediate	0	813.7478022	0	270.8045965	1979.674981	0	0	0	0	0	0	0	218.7780976	0	0	0	0	0	0
F1S4_180130_309_G01	VISp	L1-L4	GABAergic	Lamp5	4	Lamp5 Ntn1 Npy2r	Intermediate	203.2933523	25248.30831	0	680.6697064	4608.587692	0	0	0	0	41.74774199	215.9991868	0	294.0493132	19.96631139	0	0	0	0	0
F1S4_180130_310_B01	VISp	L1-L4	GABAergic	Lamp5	4	Lamp5 Ntn1 Npy2r	Core	0	1347.875904	0	0	51.47475163	0	30.50355652	0	0	0	0	0	0	0	0	0	0	0	0
F1S4_180130_311_F01	VISp	L1-L4	GABAergic	Lamp5	4	Lamp5 Ntn1 Npy2r	Core	0	386.0168196	0	0	0	0	0	0	0	0	0	0	0	0	0	0	0	0	0
F1S4_180130_311_G01	VISp	L1-L4	GABAergic	Lamp5	4	Lamp5 Ntn1 Npy2r	Intermediate	0	338.8968906	0	208.1268948	0	0	0	0	0	0	0	0	221.0197113	0	0	9.209154636	0	0	0
F1S4_180130_311_H01	VISp	L1-L4	GABAergic	Lamp5	4	Lamp5 Ntn1 Npy2r	Core	0	1448.946213	0	0	0	0	0	0	0	0	0	0	100.3522894	0	0	86.26775751	0	0	0
F1S4_180130_330_A01	VISp	L1-L4	GABAergic	Lamp5	4	Lamp5 Ntn1 Npy2r	Intermediate	0	18.58466616	0	0	661.6141154	0	0	0	0	0	0	0	0	0	0	0	0	0	0
F1S4_180130_330_B01	VISp	L1-L4	GABAergic	Lamp5	4	Lamp5 Ntn1 Npy2r	Core	0	3597.557163	0	829.5641662	0	0	47.93963774	0	0	0	47.93963774	0	404.3604227	6.252996227	0	0	0	0	0
F1S4_180130_331_G01	VISp	L1-L4	GABAergic	Lamp5	4	Lamp5 Ntn1 Npy2r	Core	0	1046.004125	0	0	0	0	0	0	0	0	0	0	242.2162945	0	0	27.77002103	0	0	0
F2S4_151223_001_D01	VISp	L2/3	GABAergic	Lamp5	4	Lamp5 Ntn1 Npy2r	Core	0	611.9270649	1.837618814	0	1666.720264	0	0	0	0	0	0	0	259.1042527	0.918809407	0	0	0	0	0
F2S4_151223_002_H01	VISp	L2/3	GABAergic	Lamp5	4	Lamp5 Ntn1 Npy2r	Core	0.749716232	3510.1714	0.749716232	0	0	0	0	0	0	0	0	0	0	0	0	0	0	0	0
F2S4_151223_004_C01	VISp	L2/3	GABAergic	Lamp5	4	Lamp5 Ntn1 Npy2r	Core	0.991773241	504.8125797	0	0	701.1836814	0	10903.55501	0	0	0	0	0	780.5255406	0	0	2.975319723	0	0	0
F2S4_151223_004_F01	VISp	L2/3	GABAergic	Lamp5	4	Lamp5 Ntn1 Npy2r	Core	4.144067684	2295.813497	0.828813537	0	2808.849076	0	0	0	0	2.486440611	0	0	43.09830392	0	0	0	0	0	0
F2S4_151223_007_B01	VISp	L4	GABAergic	Lamp5	4	Lamp5 Ntn1 Npy2r	Core	1.824679335	1922.29968	0.912339668	0.912339668	0	0	0	0	0	5.474038006	0	0	141.4126485	0	0	0	0	0	0
F2S4_151223_015_E01	VISp	L1	GABAergic	Lamp5	4	Lamp5 Ntn1 Npy2r	Core	6.042498909	3143.44221	0	0	836.5504045	1.342777535	0	0	0	0	0	0	197.3882977	0	0	79.89526335	0	0	0
F2S4_151223_015_F01	VISp	L1	GABAergic	Lamp5	4	Lamp5 Ntn1 Npy2r	Core	3.989509187	1839.163735	1.595803675	0	0	0	1.595803675	0	0	0	0	0	327.1397533	0	0	424.4837775	0	0	0
F2S4_151223_015_H01	VISp	L1	GABAergic	Lamp5	4	Lamp5 Ntn1 Npy2r	Core	13.60196715	3819.130109	0	2.266994524	2.266994524	3.022659366	0	0	0	0	0.755664841	0	28.71526398	0	0	0	0	0	0
F2S4_151223_016_F01	VISp	L1	GABAergic	Lamp5	4	Lamp5 Ntn1 Npy2r	Intermediate	0	1.448278359	1.448278359	55.03457765	1958.796481	0	0.72413918	0	0	0	0	0	0	233.1728158	0	0	0	0	0
F2S4_151223_018_A01	VISp	L1	GABAergic	Lamp5	4	Lamp5 Ntn1 Npy2r	Core	0.760539557	4900.916906	0	0	0	1.521079114	0	0	0	0	0	0.760539557	23.57672627	0	0	0	0	0	0
F2S4_151223_018_D01	VISp	L1	GABAergic	Lamp5	4	Lamp5 Ntn1 Npy2r	Core	0	8430.511195	0	0	0	0	0	0	21.23082591	0	0	0	14.36202929	0	0	0	0	0	0
F2S4_151223_018_F01	VISp	L1	GABAergic	Lamp5	4	Lamp5 Ntn1 Npy2r	Core	2.75341768	2979.197929	0	0	0	0	1.37670884	0	0	0	0	0	0	128.0339221	20.6506326	0	0	0	0
F2S4_160114_012_C01	VISp	L1	GABAergic	Lamp5	4	Lamp5 Ntn1 Npy2r	Core	0	713.5546231	1.681589842	0	0	0	1.121059895	0	0	0	0	0	605.3723432	0	0	144.6167264	0	0	0
F2S4_160114_012_F01	VISp	L1	GABAergic	Lamp5	4	Lamp5 Ntn1 Npy2r	Core	5.624711734	973.0751299	0.62496797	0.62496797	0	0.62496797	26.24865476	0	0	0	0	0	224.9884693	0	0	0	0	0	0
F2S4_160114_012_G01	VISp	L1	GABAergic	Lamp5	4	Lamp5 Ntn1 Npy2r	Core	4.271307775	1324.10541	0.711884629	0.711884629	0	1.423769258	0	0	1.423769258	0	0	0	0.711884629	0	0	0	0	0	0
F2S4_160114_014_G01	VISp	L1	GABAergic	Lamp5	4	Lamp5 Ntn1 Npy2r	Core	2.190045586	331.2443949	0	0.547511396	0	1.095022793	0	0	0.547511396	0	0	0	234.3348777	0	0	63.51132199	0	0	0
F2S4_160114_017_A01	VISp	L2/3	GABAergic	Lamp5	4	Lamp5 Ntn1 Npy2r	Intermediate	9.104849167	4531.179935	0.758737431	49.31793299	1619.904414	1.517474861	0	0	0	0	0	0	122.9154638	15.17474861	0	88.01354195	0	0	0
F2S4_160114_018_D01	VISp	L2/3	GABAergic	Lamp5	4	Lamp5 Ntn1 Npy2r	Core	2.267362164	197.5844171	3.239088805	0	748.2295141	0.647817761	252.6489268	0	0	0	0	0	24.61707492	0	0	373.4669393	0	0	0
F2S4_160114_020_F01	VISp	L2/3	GABAergic	Lamp5	4	Lamp5 Ntn1 Npy2r	Core	3.408406904	6465.747897	0	259.0389247	854.1467701	0	0	0	0	10.22522071	0	0	132.2461879	0	0	0	0	0	0
F2S4_160115_008_F01	VISp	L2/3	GABAergic	Lamp5	4	Lamp5 Ntn1 Npy2r	Core	2.861795319	7557.285988	0.71544883	0	0	0	0	0	0	72.97578063	0	0	2.146346489	0.71544883	0	0	0	0	0
F2S4_160115_026_G01	VISp	L1	GABAergic	Lamp5	4	Lamp5 Ntn1 Npy2r	Core	0	40.7843857	0	0	0	381.5039412	0	0	0	0	0	0	51.83015682	0	0	79.86942199	0	0	0
F2S4_160115_028_B01	VISp	L1	GABAergic	Lamp5	4	Lamp5 Ntn1 Npy2r	Intermediate	5.20671011	839.0241435	0	0	3033.280547	0	246.9468224	0	0	0	0	0	0	0	0	0	0	0	0
F2S4_160115_029_D01	VISp	L1	GABAergic	Lamp5	4	Lamp5 Ntn1 Npy2r	Core	2.796223141	1991.609932	4.194334712	655.7143267	1753.23191	0.699055785	0.699055785	0	1.398111571	0	0	0	169.8705558	0	0	0	0	0	0
F2S4_160119_006_F01	VISp	L1	GABAergic	Lamp5	4	Lamp5 Ntn1 Npy2r	Intermediate	0	2550.640236	0	490.6256765	0	0	0	0	0	0	0	0	556.8601429	0	0	0	0	4.29297467	0
F2S4_160119_006_H01	VISp	L1	GABAergic	Lamp5	4	Lamp5 Ntn1 Npy2r	Core	6.524035436	804.235641	0	1.779282392	0	0.593094131	0.593094131	0	0	0	0	0	74.13676632	0	0	0	0	0	0
F2S4_160121_003_A01	VISp	L2/3	GABAergic	Lamp5	4	Lamp5 Ntn1 Npy2r	Core	1.643516819	1611.742161	0	0	0	0	0	0	0	0	0	0	48.2098267	0	0	0	0	0	0
F2S4_160121_007_C01	VISp	L1	GABAergic	Lamp5	4	Lamp5 Ntn1 Npy2r	Core	0	1436.874395	0	0	0	0	0	0	0	14.03883141	0	0	141.7921972	0	0	0	0	0	0
F2S4_160121_007_F01	VISp	L1	GABAergic	Lamp5	4	Lamp5 Ntn1 Npy2r	Core	1.499149233	589.9152231	0	0	0	0	755.5712133	0	0	0	0	0	83.20278242	0	0	0	0	0	0
F2S4_160127_002_G01	VISp	L2/3	GABAergic	Lamp5	4	Lamp5 Ntn1 Npy2r	Core	0	1121.730559	0	1.381441576	0	0	176.1338009	0	0	0	0	0	58.02054618	0	0	0	0	0	0
F2S4_160127_005_H01	VISp	L2/3	GABAergic	Lamp5	4	Lamp5 Ntn1 Npy2r	Core	0.691036292	4301.700917	0.691036292	0.691036292	0	0	0	0	0	0	111.9478793	0	133.3700043	88.45264536	0	0	0	0	0
F2S4_160129_029_E01	VISp	L2/3	GABAergic	Lamp5	4	Lamp5 Ntn1 Npy2r	Intermediate	0	1930.587656	0	2.11455384	2912.445489	0	0	0	0	0	0	0	26.78434864	22.55524096	0	0	0	0	0
F2S4_160129_030_G01	VISp	L2/3	GABAergic	Lamp5	4	Lamp5 Ntn1 Npy2r	Core	0	393.4788851	0.886213705	3.54485482	1568.598258	0	663.7740651	0	0	0	0	0	2.658641115	0	0	0	0	0	0
F2S4_160303_016_A01	VISp	L1	GABAergic	Lamp5	4	Lamp5 Ntn1 Npy2r	Core	2.109139534	2437.638017	17.92768604	0	0.527284884	0	0	0	0	0	0	0	132.8757907	0	0	61.69233138	0	0	0
F2S4_160303_017_C01	VISp	L1	GABAergic	Lamp5	4	Lamp5 Ntn1 Npy2r	Core	0.538316566	1389.933373	0	0.538316566	0	0	327.2964719	0	0	18.8410798	45.75690808	0	15.07286384	0	0	311.6852915	0	0	0
F2S4_160303_017_H01	VISp	L1	GABAergic	Lamp5	4	Lamp5 Ntn1 Npy2r	Core	0.508113815	894.2803152	0	0	0	0.508113815	0	0	0	0	0	0	94.00105586	0	0	0	0	0	0
F2S4_160303_019_E01	VISp	L1	GABAergic	Lamp5	4	Lamp5 Ntn1 Npy2r	Core	12.94598095	101.6259505	0	255.6831238	0.647299048	0	0	0.647299048	0	14.24057905	0	0	345.6576914	0	0	0	0	0	33.01225143
F2S4_160304_001_C01	VISp	L1	GABAergic	Lamp5	4	Lamp5 Ntn1 Npy2r	Core	2.205874243	675.7328098	0.735291414	0.735291414	0	0	0	0	0	0	0	0	265.4402006	0	0	0	0	0	0
F2S4_160304_002_C01	VISp	L1	GABAergic	Lamp5	4	Lamp5 Ntn1 Npy2r	Core	2.350804249	1796.798048	1.567202833	0	37.61286799	0	25.07524533	0	0	0	0	0	65.82251898	1.567202833	0	0	0	0	0
F2S4_160304_003_F01	VISp	L1	GABAergic	Lamp5	4	Lamp5 Ntn1 Npy2r	Core	1.976176533	170.6099074	0.658725511	1.317451022	175.2209859	0	1.317451022	0	0	0.658725511	0	0	38.20607964	0	0	0	0	0	0
F2S4_160304_003_G01	VISp	L1	GABAergic	Lamp5	4	Lamp5 Ntn1 Npy2r	Core	1.703058182	1444.193338	0	710.1752617	0.851529091	0	1.703058182	0	0	0	0	0	103.03502	0	0	0	0	0	0
F2S4_160304_013_C01	VISp	L4	GABAergic	Lamp5	4	Lamp5 Ntn1 Npy2r	Core	0	169.2514805	0	0.486354829	0.486354829	59.82164396	0.486354829	0	0	0	0	0	713.9688889	0	0	0	0	0	0
F2S4_160304_015_H01	VISp	L2/3	GABAergic	Lamp5	4	Lamp5 Ntn1 Npy2r	Intermediate	2.290828724	4094.283638	0	1.145414362	463.8928167	0.572707181	0.572707181	0	0	0	0	0	29.20806624	0	0	0	0	0	0
F2S4_160304_016_F01	VISp	L2/3	GABAergic	Lamp5	4	Lamp5 Ntn1 Npy2r	Core	0.79008288	6595.61188	0	0	1287.045011	0	0	0	0	0	0.79008288	0	0	0	0	243.3455269	0	0	0
F2S4_160304_019_F01	VISp	L2/3	GABAergic	Lamp5	4	Lamp5 Ntn1 Npy2r	Core	0	1103.213631	0	0	2252.201357	1.158837848	0	0	0	0	0	0	378.9399763	0	0	0	0	0	0
F2S4_160304_021_C01	VISp	L1	GABAergic	Lamp5	4	Lamp5 Ntn1 Npy2r	Core	4.353207661	1563.527085	2.902138441	0	1556.997273	0.72553461	1.45106922	0	0	0	0	0	0	0	0	0	0	0	0
F2S4_160304_021_G01	VISp	L1	GABAergic	Lamp5	4	Lamp5 Ntn1 Npy2r	Core	1.210527717	1450.212206	1.210527717	0	0.605263859	0	0	0	0	0	0	0	59.31585816	0	0	0	0	0	0
F2S4_160304_021_H01	VISp	L1	GABAergic	Lamp5	4	Lamp5 Ntn1 Npy2r	Intermediate	1.077074944	326.8922457	3.769762306	133.5572931	0.538537472	0	0	0	0	0	0	0	306.4278217	0	0	0	0	0	0
F2S4_160330_002_F01	VISp	L2/3	GABAergic	Lamp5	4	Lamp5 Ntn1 Npy2r	Core	0.426555285	911.9751984	0	0	0.426555285	0	0.426555285	0	0	0	0	0	2.559331707	0.426555285	0	0	0	0	29.00575935
F2S4_160330_003_F01	VISp	L2/3	GABAergic	Lamp5	4	Lamp5 Ntn1 Npy2r	Core	180.6125649	942.4798988	0	402.9954623	0	0.588314544	0	0	0	0	0	0	110.0148196	0	0	0	0	0	0
F2S4_160330_020_B01	VISp	L2/3	GABAergic	Lamp5	4	Lamp5 Ntn1 Npy2r	Core	0	443.0710418	0	0	0	0	664.6065627	0	0	42.34125997	0	0	462.729484	10.58531499	0	0	0	0	0
F2S4_160330_020_C01	VISp	L2/3	GABAergic	Lamp5	4	Lamp5 Ntn1 Npy2r	Intermediate	0	37.216808	0	0	33.4951272	0	0	0	0	0.74433616	0	0	0	0	0	0	0	0	0
F2S4_160404_006_H01	VISp	L1	GABAergic	Lamp5	4	Lamp5 Ntn1 Npy2r	Intermediate	1.878822523	80.78936849	0	0	1696.576738	0.469705631	286.9901404	0	0	0	0.469705631	0	0	0	0	0	0	0	0
F2S4_160404_016_G01	VISp	L2/3	GABAergic	Lamp5	4	Lamp5 Ntn1 Npy2r	Core	1.538526235	511.3035523	0	0	1411.854242	58.46399695	50.77136577	0	0	0.512842078	0	0	0	0	0	139.4930453	0	0	0
F2S4_160404_019_A01	VISp	L2/3	GABAergic	Lamp5	4	Lamp5 Ntn1 Npy2r	Intermediate	1.673825992	3732.074021	0	61.37361972	382.7482103	0.557941997	0.557941997	0	0	11.15883995	158.4555273	0	76.99599565	0	0	0	0	0	0
F2S4_160404_029_C01	VISp	L1	GABAergic	Lamp5	4	Lamp5 Ntn1 Npy2r	Core	0	1377.053468	0.583744581	0.583744581	0	0	0	0	0	0.583744581	123.7538513	0.583744581	148.8548683	0	0	141.2661887	0	0	0
F2S4_160404_029_G01	VISp	L1	GABAergic	Lamp5	4	Lamp5 Ntn1 Npy2r	Core	0	47.64291634	0.496280379	0.496280379	0	0	202.9786748	0	0	0	0	0	51.11687899	0	0	0	0	0	0
F2S4_160404_031_A01	VISp	L1	GABAergic	Lamp5	4	Lamp5 Ntn1 Npy2r	Core	4.124536247	102.5978392	0.515567031	0	42.27649654	0	34.54299107	0	0	0	0.515567031	0	0	0	0	0	0	0	0
F2S4_160404_031_B01	VISp	L1	GABAergic	Lamp5	4	Lamp5 Ntn1 Npy2r	Core	1.64178451	1672.978416	0.547261503	1.094523007	1.64178451	0	0	1.094523007	0	16.96510661	21.34319863	0	206.3175868	0	0	266.5163522	0	0	0
F2S4_160404_033_G01	VISp	L1	GABAergic	Lamp5	4	Lamp5 Ntn1 Npy2r	Core	1.598978359	1549.943023	0	2.664963932	0	0.532992786	1.065985573	0	0	0	0	0	96.47169435	17.05576917	0	0	0	0	0
F2S4_160404_046_F01	VISp	L2/3	GABAergic	Lamp5	4	Lamp5 Ntn1 Npy2r	Core	7.807226056	1697.290945	2.081926948	0	54.13010066	1.040963474	0.520481737	0	0	0	46.3228746	0	186.8529436	0	0	0	0	0	0
F2S4_160404_050_B01	VISp	L1	GABAergic	Lamp5	4	Lamp5 Ntn1 Npy2r	Core	1.962928139	33.36977837	1.962928139	0	0.490732035	0	0	0	0	0	0	0	0	0	0	0	0	0	0
F2S4_160405_001_C01	VISp	L1	GABAergic	Lamp5	4	Lamp5 Ntn1 Npy2r	Core	0	1007.536502	0	0	0	0	0	0	0	18.41089999	51.09024747	0	9.665722494	0	0	92.51477245	0	0	0
F2S4_160405_003_A01	VISp	L1	GABAergic	Lamp5	4	Lamp5 Ntn1 Npy2r	Core	0	1570.757031	0	288.0295751	0	0	0	0	0	9.575451301	0	0	221.001416	0	0	0	0	0	0
F2S4_160405_009_C01	VISp	L1	GABAergic	Lamp5	4	Lamp5 Ntn1 Npy2r	Intermediate	0.423876272	1166.931377	0	8.053649172	1084.699381	0	0	0	0	0	0	0	12.29241189	0.847752544	0	61.88593574	0	0	0
F2S4_160405_010_D01	VISp	L1	GABAergic	Lamp5	4	Lamp5 Ntn1 Npy2r	Core	2.628987319	482.6820718	0	0	0	0	0	0	0	6.309569566	0	0	46.79597428	0	0	0	0	0	0
F2S4_160405_011_E01	VISp	L1	GABAergic	Lamp5	4	Lamp5 Ntn1 Npy2r	Core	0	337.8629147	0	78.83468009	0	0	0	0	0	0	0	0	164.3242358	0	0	0	0	0	0
F2S4_160405_011_G01	VISp	L1	GABAergic	Lamp5	4	Lamp5 Ntn1 Npy2r	Intermediate	0	132.1688741	0	0	0	0	0	0	0	5.72159628	0	0	49.77788763	0	0	0	0	0	0
F2S4_160405_012_B01	VISp	L1	GABAergic	Lamp5	4	Lamp5 Ntn1 Npy2r	Core	0	1071.265883	0	0	0	0	0	0	0	0	0	0	122.8270952	0	0	49.66486894	0	0	0
F2S4_160405_014_E01	VISp	L1	GABAergic	Lamp5	4	Lamp5 Ntn1 Npy2r	Core	0	107.2337854	0	27.6208235	0	0	66.07334249	0	0	0	0	0	49.28421448	0	0	0	0	0	0
F2S4_160405_014_G01	VISp	L1	GABAergic	Lamp5	4	Lamp5 Ntn1 Npy2r	Core	0	1341.530956	0	0	0	0	0	0	0	0	0	0	253.4251557	0	0	435.8017578	0	0	0
F2S4_160405_015_A01	VISp	L1	GABAergic	Lamp5	4	Lamp5 Ntn1 Npy2r	Core	0	1125.113437	0	16.00120695	0	0	0	0	0	14.17249758	0	0	441.6333118	6.857660121	0	0	0	0	0
F2S4_160405_015_F01	VISp	L1	GABAergic	Lamp5	4	Lamp5 Ntn1 Npy2r	Core	0	532.7269624	0	0	0	0	0	0	0	0	0	0	17.29632995	0	0	0	0	0	0
F2S4_160405_015_H01	VISp	L1	GABAergic	Lamp5	4	Lamp5 Ntn1 Npy2r	Core	0	248.7443142	0	0	0	0	0	0	0	0	0	0	118.5291699	0	0	0	0	0	0
F2S4_160405_017_C01	VISp	L1	GABAergic	Lamp5	4	Lamp5 Ntn1 Npy2r	Core	0	931.6274583	0	0	0	0	0	0	0	0	0	0	51.75708102	0	0	0	0	0	0
F2S4_160405_017_D01	VISp	L1	GABAergic	Lamp5	4	Lamp5 Ntn1 Npy2r	Core	0	387.2490505	0	0	0	0	0	0	0	0	0	0	193.1404639	0	0	0	0	0	0
F2S4_160405_021_D01	VISp	L1	GABAergic	Lamp5	4	Lamp5 Ntn1 Npy2r	Core	0	0	0	0	0	0	1641.209363	0	0	0	0	0	0	0	0	0	0	0	48.41325555
F2S4_160405_021_G01	VISp	L1	GABAergic	Lamp5	4	Lamp5 Ntn1 Npy2r	Core	0	1362.201626	0	14.23320691	952.3689917	0	0	0	0	0	0	0	0	0	0	100.4696958	0	0	0
F2S4_160405_023_F01	VISp	L1	GABAergic	Lamp5	4	Lamp5 Ntn1 Npy2r	Core	2.397270947	763.7705236	0	0	0	0	0.479454189	0	0	0	0	0	354.3166459	0	0	0	0	0	0
F2S4_160405_031_B01	VISp	L1	GABAergic	Lamp5	4	Lamp5 Ntn1 Npy2r	Core	2.733968963	224.185455	0	0.546793793	58.50693581	0	57.96014201	0	0	0	0	0	558.2764622	0	0	23.51213308	0	0	0
F2S4_160405_033_B01	VISp	L1	GABAergic	Lamp5	4	Lamp5 Ntn1 Npy2r	Core	6.316603727	1308.022864	0	0.485892594	0.485892594	1.943570378	166.6611599	0	0	0	0.485892594	0	71.42621138	0	0	0	0	0	0
F2S4_160405_033_D01	VISp	L1	GABAergic	Lamp5	4	Lamp5 Ntn1 Npy2r	Core	3.389935572	914.3140514	0	0.48427651	0.48427651	0.48427651	0.48427651	0	0	65.37732889	0	0	133.6603168	0	0	84.7483893	0	0	0
F2S4_160405_043_A01	VISp	L1	GABAergic	Lamp5	4	Lamp5 Ntn1 Npy2r	Intermediate	0	191.2586706	0	0	1159.000606	0	0	0.673446023	0	0	0	0	0	0	0	0	0	0	0
F2S4_160405_044_D01	VISp	L1	GABAergic	Lamp5	4	Lamp5 Ntn1 Npy2r	Core	0	1125.366633	0.564376446	0.564376446	19.75317561	0.564376446	0	0	0	0	0	0	0	0	0	0	0	0	0
F2S4_160405_044_E01	VISp	L1	GABAergic	Lamp5	4	Lamp5 Ntn1 Npy2r	Core	3.932103066	1.966051533	0	0.655350511	0	0	136.9682568	0	0	0	0.655350511	0	0	0	0	0	0	0	0
F2S4_160405_044_H01	VISp	L1	GABAergic	Lamp5	4	Lamp5 Ntn1 Npy2r	Core	1.737459452	227.0280351	0	0	2309.083612	1.158306301	0	0.579153151	0	0	0	0	0	0	0	0	0	0	0
F2S4_160413_006_B01	VISp	L1	GABAergic	Lamp5	4	Lamp5 Ntn1 Npy2r	Core	0	1704.772011	0.587244923	0	0	0	0	0.587244923	0	0	0	0	0	0	0	33.4729606	0	0	0
F2S4_160413_006_G01	VISp	L1	GABAergic	Lamp5	4	Lamp5 Ntn1 Npy2r	Core	7.384765003	1302.558935	0	42.03635463	0	0	0.568058846	0	0	0	0	0	247.1055982	0	0	90.32135657	0	0	0
F2S4_160413_008_A01	VISp	L1	GABAergic	Lamp5	4	Lamp5 Ntn1 Npy2r	Core	0.440488855	2716.494766	0.880977709	26.42933127	0	0	0	0	0	0.440488855	0	0.440488855	102.6339031	0	0	44.48937431	0	0	0
F2S4_160413_008_G01	VISp	L1	GABAergic	Lamp5	4	Lamp5 Ntn1 Npy2r	Core	1.855855689	2079.300714	1.113513413	60.87206659	38.23062719	0	0.371171138	0	0	0	0	0	166.6558408	0	0	0	0	0	0
F2S4_160413_009_C01	VISp	L1	GABAergic	Lamp5	4	Lamp5 Ntn1 Npy2r	Core	0.8711731	10244.56007	0.8711731	0.43558655	17.85904855	0	0	0	0	16.11670235	0	0	259.1739972	0	0	179.8972451	0	0	0
F2S4_160413_010_B01	VISp	L1	GABAergic	Lamp5	4	Lamp5 Ntn1 Npy2r	Intermediate	0.784468466	314.964089	0.784468466	0	0.784468466	0	0	0	0	0	0	0	242.4007559	0	0	0	0	0	0
F2S4_160414_009_G01	VISp	L1	GABAergic	Lamp5	4	Lamp5 Ntn1 Npy2r	Core	0.395339423	871.3280874	0.790678845	0	0	0	0	0	0	0	0	0	468.4772158	0	0	235.6222959	0	0	0
F2S4_160414_011_D01	VISp	L2/3	GABAergic	Lamp5	4	Lamp5 Ntn1 Npy2r	Core	0	2510.380737	0.492328052	0.492328052	600.1478953	0	0	0	0	0.492328052	0	0	149.6677278	0	0	132.928574	0	0	0
F2S4_160415_016_B01	VISp	L1	GABAergic	Lamp5	4	Lamp5 Ntn1 Npy2r	Core	3.482528156	3028.306984	0	210.4442014	30.34774536	0.995008045	0	0	0	0	0	0	146.2661826	0	0	0	0	0	0
F2S4_160415_017_A01	VISp	L1	GABAergic	Lamp5	4	Lamp5 Ntn1 Npy2r	Core	1.426307675	3516.79929	0.475435892	38.51030721	0	0	60.85579411	0	0	0	0	0	46.59271737	0	0	0	0	0	0
F2S4_160415_019_B01	VISp	L1	GABAergic	Lamp5	4	Lamp5 Ntn1 Npy2r	Core	0.659806439	4978.239584	0	0	0.659806439	0.659806439	0	0.659806439	0	0	0	0	52.78451513	0	0	167.5908356	0	0	0
F2S4_160415_019_D01	VISp	L1	GABAergic	Lamp5	4	Lamp5 Ntn1 Npy2r	Core	1.440000922	2243.521436	0.480000307	0	420.4802691	0	0.960000614	0	0.480000307	0	0	0	0	0	0	34.08002181	0	0	0
F2S4_160415_019_G01	VISp	L1	GABAergic	Lamp5	4	Lamp5 Ntn1 Npy2r	Core	0.520833605	709.8962031	1.041667209	0	0	0	0	0	0	0	0	0	243.750127	11.4583393	0	240.1042917	0	0	0
F2S4_160415_021_C01	VISp	L1	GABAergic	Lamp5	4	Lamp5 Ntn1 Npy2r	Core	0	1282.33611	1.055420667	0	0	0	1541.969594	0	0.527710333	0	0	0	0	0	0	0	0	0	0
F2S4_160415_021_F01	VISp	L1	GABAergic	Lamp5	4	Lamp5 Ntn1 Npy2r	Core	2.377405518	2299.902098	1.426443311	0	304.3079063	0	0	0	0	0	0	0	118.8702759	0	0	0	0	0	0
F2S4_160415_022_A01	VISp	L1	GABAergic	Lamp5	4	Lamp5 Ntn1 Npy2r	Intermediate	1.056213811	515.43234	1.056213811	0	0	0	26.93345219	0	0	0	0	0	39.60801793	0	0	0	0	0	0
F2S4_160415_022_C01	VISp	L1	GABAergic	Lamp5	4	Lamp5 Ntn1 Npy2r	Core	0	1785.742836	0.614925219	0	0.614925219	0	0	0	0	0	0	0	71.94625062	0	0	0	0	0	0
F2S4_160415_023_F01	VISp	L1	GABAergic	Lamp5	4	Lamp5 Ntn1 Npy2r	Core	1.211415654	1219.289856	2.422831309	0	881.9105963	0	994.5722522	0	0	1.211415654	0	0	141.1299237	0	0	0	0	0	0
F2S4_160415_023_G01	VISp	L1	GABAergic	Lamp5	4	Lamp5 Ntn1 Npy2r	Core	1.10875808	658.6022996	0.55437904	4.98941136	0	0	0	0	0	0	0	0	195.6958011	0	0	0	0	0	0
F2S4_160419_001_E01	VISp	L1	GABAergic	Lamp5	4	Lamp5 Ntn1 Npy2r	Core	0	455.4887349	0.637939405	0	1676.504756	0	692.8021935	0	0	0	0	0	0	0	0	103.3461836	0	0	0
F2S4_160419_002_B01	VISp	L1	GABAergic	Lamp5	4	Lamp5 Ntn1 Npy2r	Core	0	161.1424156	0	0.647158296	0	0	212.2679209	0	0	0	0	0	0	1.941474887	0	239.4485694	0	0	0
F2S4_160419_002_G01	VISp	L1	GABAergic	Lamp5	4	Lamp5 Ntn1 Npy2r	Core	0.61695034	276.3937525	0	133.2612735	0	0	0	0.61695034	0	0	0	0	473.8178615	0	0	0	0	0	0
F2S4_160429_001_B01	VISp	L1	GABAergic	Lamp5	4	Lamp5 Ntn1 Npy2r	Core	1.025946705	497.584152	0	0	0	0	0.512973353	0	0	0	0	0	128.2433381	0	0	0	0	0	0
F2S4_160429_001_E01	VISp	L1	GABAergic	Lamp5	4	Lamp5 Ntn1 Npy2r	Core	1.170191478	1458.058582	0	0	0	1.170191478	1.170191478	0	0	14.04229774	0	0	427.7049854	0	0	139.2527859	0	0	0
F2S4_160429_001_G01	VISp	L1	GABAergic	Lamp5	4	Lamp5 Ntn1 Npy2r	Intermediate	2.496793181	2466.207465	0.624198295	0	0.624198295	0.624198295	0.624198295	0	0	0	148.5591943	0	56.17784658	0	0	0	0	0	0
F2S4_160429_001_H01	VISp	L1	GABAergic	Lamp5	4	Lamp5 Ntn1 Npy2r	Core	0.605295	897.6524844	0	0	0	0.605295	0	0	0	0	0	0	239.0915248	0	0	0	0	0	0
F2S4_160429_002_B01	VISp	L1	GABAergic	Lamp5	4	Lamp5 Ntn1 Npy2r	Intermediate	1.552672071	346.2458718	0	0	133.0122407	0.517557357	1.035114714	104.5465861	0	0	1.035114714	0	174.9343867	0	0	0	0	0	0
F2S4_160429_002_G01	VISp	L1	GABAergic	Lamp5	4	Lamp5 Ntn1 Npy2r	Core	4.233901911	232.3353674	0	103.2013591	0.529237739	1.058475478	0.529237739	0	0	14.81865669	0	0	48.68987198	0	0	0	0	0	0
F2S4_160429_009_F01	VISp	L1	GABAergic	Lamp5	4	Lamp5 Ntn1 Npy2r	Core	1.04551711	1842.201148	0.522758555	0	0	1.04551711	2.09103422	0	0	38.16137452	0	0	169.8965304	0	0	254.5834163	0	0	0
F2S4_160429_021_G01	VISp	L2/3	GABAergic	Lamp5	4	Lamp5 Ntn1 Npy2r	Core	2.521863506	14.29055987	0.420310584	0	2087.262362	78.59807926	752.7762565	0	0	0	0	0	0	0	0	0	0	0	0
F2S4_160502_007_B01	VISp	L1	GABAergic	Lamp5	4	Lamp5 Ntn1 Npy2r	Core	3.040948985	1477.032364	0.434421284	0.868842567	0	0	0	0	0	0	0	0	208.9566374	0	0	13.46705979	0	0	0
F2S4_160502_008_G01	VISp	L1	GABAergic	Lamp5	4	Lamp5 Ntn1 Npy2r	Intermediate	0.889180935	624.6496071	0.444590468	92.47481728	0	0.889180935	0.444590468	0	0	0	0	0	453.0376866	0	0	41.3469135	0	0	17.33902824
F2S4_160502_017_E01	VISp	L1	GABAergic	Lamp5	4	Lamp5 Ntn1 Npy2r	Core	10.84948356	1349.985741	0.516642075	0	0	0.516642075	921.6894609	0	0	0.516642075	0.516642075	0	231.4556494	0	0	209.2400402	0	0	0
F2S4_160502_017_G01	VISp	L1	GABAergic	Lamp5	4	Lamp5 Ntn1 Npy2r	Intermediate	4.165169809	1701.992513	31.23877357	0	0.520646226	0.520646226	0.520646226	0	1.561938678	10.93357075	1.041292452	0	182.2261791	18.74326414	0	0	0	0	0
F2S4_160502_018_A01	VISp	L1	GABAergic	Lamp5	4	Lamp5 Ntn1 Npy2r	Core	0.927721238	326.0940153	0.927721238	0.927721238	0	0	0	0	0	0	0	0	199.9239269	0	0	51.48852873	0	0	0
F2S4_160502_018_C01	VISp	L1	GABAergic	Lamp5	4	Lamp5 Ntn1 Npy2r	Core	6.35728582	1045.243744	0	0.529773818	1.059547637	0	0	0	0	0	0	0	470.9689245	0	0	0	0	0	0
F2S4_160502_018_E01	VISp	L1	GABAergic	Lamp5	4	Lamp5 Ntn1 Npy2r	Core	4.117990729	55.07812601	0	0.514748841	175.014606	0.514748841	0	0	0	0	0	0.514748841	53.01913064	0	0	57.13712137	0	0	0
F2S4_160502_019_G01	VISp	L1	GABAergic	Lamp5	4	Lamp5 Ntn1 Npy2r	Core	1.777044846	1545.140493	0	0	26.65567268	0	0	0	0	0	0	0	5.331134537	0	0	243.4551438	0	0	0
F2S4_160502_019_H01	VISp	L1	GABAergic	Lamp5	4	Lamp5 Ntn1 Npy2r	Core	2.077360921	633.0757406	1.558020691	0	0.51934023	0	111.1388093	0	0	0	0	0	0	0	0	160.9954714	0	0	0
F2S4_160502_020_C01	VISp	L1	GABAergic	Lamp5	4	Lamp5 Ntn1 Npy2r	Intermediate	2.862619457	2971.398996	0	0	0.572523891	0	0.572523891	0	0	50.38210245	77.29072534	0	388.7437223	0	0	11.45047783	0	0	0
F2S4_160504_001_H01	VISp	L1	GABAergic	Lamp5	4	Lamp5 Ntn1 Npy2r	Core	20.48978556	5363.77053	1.70748213	1.70748213	3.41496426	0	0.56916071	0	0	0	0	0	75.12921371	0	0	0	0	0	0
F2S4_160504_002_E01	VISp	L1	GABAergic	Lamp5	4	Lamp5 Ntn1 Npy2r	Core	9.953521793	992.5083159	0	0	2127.683778	0.947954456	0.947954456	0	0	0	0	0	0	0	0	28.43863369	0	0	0
F2S4_160504_002_H01	VISp	L1	GABAergic	Lamp5	4	Lamp5 Ntn1 Npy2r	Intermediate	7.619932983	2364.560454	0	0	1793.06548	0.476245811	0	0.476245811	0	0	0.476245811	0	80.96178794	0	0	0	0	0	0
F2S4_160504_003_A01	VISp	L1	GABAergic	Lamp5	4	Lamp5 Ntn1 Npy2r	Core	4.372353087	776.9671435	0	0	0.437235309	0.874470617	0	0	0	0	0.437235309	0	341.4807761	0	0	77.82788494	0	0	0
F2S4_160504_003_H01	VISp	L1	GABAergic	Lamp5	4	Lamp5 Ntn1 Npy2r	Intermediate	7.081078944	2054.102984	0	0.590089912	0.590089912	0	23.60359648	0	0	23.01350657	0	0	75.53150874	0	0	518.6890326	0	0	0
F2S4_160504_004_E01	VISp	L1	GABAergic	Lamp5	4	Lamp5 Ntn1 Npy2r	Intermediate	24.6702647	2051.64806	1.147454172	119.3352339	0	1.147454172	0	0	0	0.573727086	0	0	22.94908344	0	0	29.83380847	0	0	0
F2S4_160504_004_G01	VISp	L1	GABAergic	Lamp5	4	Lamp5 Ntn1 Npy2r	Core	4.637977512	328.2657417	0	0.515330835	0	0	0	0.515330835	0	0	0.515330835	0	114.9187761	0	0	0	0	0	0
F2S4_160504_005_D01	VISp	L1	GABAergic	Lamp5	4	Lamp5 Ntn1 Npy2r	Core	5.56852713	1620.998248	0	0	0.556852713	1.670558139	1.670558139	0	0	0.556852713	0	0	124.7350077	0	0	0	0	0	0
F2S4_160504_006_A01	VISp	L1	GABAergic	Lamp5	4	Lamp5 Ntn1 Npy2r	Intermediate	3.411788216	2360.957445	0.974796633	77.00893401	22.42032256	0.487398317	0	0.487398317	0	0	0	0	180.8247754	0	0	69.21056095	0	0	0
F2S4_160504_009_C01	VISp	L1	GABAergic	Lamp5	4	Lamp5 Ntn1 Npy2r	Core	3.810383868	1451.756254	0	0	0	0	0.476297983	0	0	0	0	0	199.0925571	0	0	0	0	0	0
F2S4_160504_009_E01	VISp	L1	GABAergic	Lamp5	4	Lamp5 Ntn1 Npy2r	Intermediate	6.399013699	2821.965041	1.066502283	172.7733699	0	0	1.599753425	0	0	11.73152511	52.79186301	0	25.06280365	1.066502283	0	0	0	0	0
F2S4_160504_009_H01	VISp	L1	GABAergic	Lamp5	4	Lamp5 Ntn1 Npy2r	Core	1.834753534	1240.293389	1.834753534	0	0	0	0	0	0.611584511	0	0	0	0	0	0	0	0	0	0
F2S4_160504_010_F01	VISp	L1	GABAergic	Lamp5	4	Lamp5 Ntn1 Npy2r	Intermediate	1.719424337	986.0898571	0.429856084	0	2118.330783	0.429856084	75.65467082	0	0	0	0	0	0	0	0	0	0	0	0
F2S4_160516_012_H01	VISp	L2/3	GABAergic	Lamp5	4	Lamp5 Ntn1 Npy2r	Core	0.47999616	175.1985984	2.3999808	0	0.47999616	269.7578419	857.2731418	0	0	0	0	0	0	0	0	0	0	0	0
F2S4_160516_013_D01	VISp	L2/3	GABAergic	Lamp5	4	Lamp5 Ntn1 Npy2r	Core	0.592959437	0	2.371837747	0	3787.824882	418.036403	1708.909097	0	0	0	0	0	0	0	0	0	0	0	0
F2S4_161109_001_H01	VISp	L1-L6	GABAergic	Lamp5	4	Lamp5 Ntn1 Npy2r	Core	0	562.6415035	0	0	0	0	170.8721449	0.562079424	0	0	0	0	15.73822387	0	0	0	0	0	0
F2S4_161110_001_B01	VISp	L1-L6	GABAergic	Lamp5	4	Lamp5 Ntn1 Npy2r	Core	0	1305.322538	5.21897061	26.67473867	0	0	0	0	0.579885623	0	0	0	0	0	0	0	0	0	0
F2S4_170519_004_H01	VISp	L1-L4	GABAergic	Lamp5	4	Lamp5 Ntn1 Npy2r	Core	6.847400696	1484.018478	0	1.244981945	35.48198542	0	0.622490972	0	0	0	0.622490972	0	12.44981945	0	0	36.72696737	0	0	0
F2S4_170707_003_A01	VISp	L1	GABAergic	Lamp5	4	Lamp5 Ntn1 Npy2r	Core	1.102626401	588.2511849	0	0	1481.37857	0	1492.404834	0	0	0	0	0	0	0	0	0	0	0	0
F2S4_170707_003_B01	VISp	L1	GABAergic	Lamp5	4	Lamp5 Ntn1 Npy2r	Core	0.562979694	665.4419982	0	0.562979694	3017.00818	0	680.0794702	0	0	0	0	0	541.0234858	0	0	0	0	0	0
F2S4_170707_003_E01	VISp	L1	GABAergic	Lamp5	4	Lamp5 Ntn1 Npy2r	Intermediate	1.121448373	72.33342006	0	0	1673.761697	0.560724187	89.71586984	0	0	0	0	0	0	0	0	0	0	0	0
F2S4_170707_003_F01	VISp	L1	GABAergic	Lamp5	4	Lamp5 Ntn1 Npy2r	Intermediate	2.122065449	2052.567805	1.061032724	0.530516362	0	0	0	0	0	0	0	0	405.3145007	0	0	0	0	0	0
F2S4_170707_003_H01	VISp	L1	GABAergic	Lamp5	4	Lamp5 Ntn1 Npy2r	Core	2.668455125	1072.71896	0	262.8428298	44.47425208	0.889485042	0.444742521	0	0	0	0	0	190.7945414	0	0	0	0	0	0
F2S4_170707_004_A01	VISp	L1	GABAergic	Lamp5	4	Lamp5 Ntn1 Npy2r	Core	0	735.5140659	0	1.230985884	0	0	1.230985884	0	0	0	0.615492942	0	261.5845004	0	0	0	0	0	0
F2S4_170707_004_D01	VISp	L1	GABAergic	Lamp5	4	Lamp5 Ntn1 Npy2r	Core	3.739401135	727.9367543	0	0	0.623233522	0	285.4409533	0	0	8.102035792	0	0	297.9056237	0	0	0	0	0	0
F2S4_170707_004_G01	VISp	L1	GABAergic	Lamp5	4	Lamp5 Ntn1 Npy2r	Core	0.517402042	2819.841127	0	0	0	0	0	0	0	0	0	0	320.7892658	0	0	0	0	0	0
F2S4_170707_021_G01	VISp	L1	GABAergic	Lamp5	4	Lamp5 Ntn1 Npy2r	Core	1.111713289	629.7855783	0	0	1742.054724	0.555856645	386.8762246	0	0	0	0	0	105.6127625	0	0	0	0	0	0
F2S4_170707_021_H01	VISp	L1	GABAergic	Lamp5	4	Lamp5 Ntn1 Npy2r	Core	1.206742068	4659.231124	0.603371034	0	0	0	51.28653789	52.49327996	0	53.09665099	0	0	473.0428906	0	0	0	0	0	0
F2S4_170707_022_H01	VISp	L1	GABAergic	Lamp5	4	Lamp5 Ntn1 Npy2r	Core	1.213629054	266.3915774	1.213629054	0	648.077915	0	1475.77293	0	0	0	0	0	166.2671804	0	0	0	0	0	0
F2S4_170707_036_B01	VISp	L2/3	GABAergic	Lamp5	4	Lamp5 Ntn1 Npy2r	Core	2.306715946	4.036752905	0	0.576678986	38.63749209	226.6348417	686.8246729	0	0	0	0	0	437.1226717	0	0	0	0	0	0
F2S4_170807_005_C01	VISp	L1-L4	GABAergic	Lamp5	4	Lamp5 Ntn1 Npy2r	Intermediate	30.83465558	1467.215695	0	0	5.139109264	2.569554632	3.854331948	0	0	0	0	0	453.5263925	0	0	30.83465558	0	0	0
F2S4_170807_005_F01	VISp	L1-L4	GABAergic	Lamp5	4	Lamp5 Ntn1 Npy2r	Core	0	12764.76013	3.003944179	447.5876826	0	0	0	1.001314726	0	0	0	0	262.3444583	0	0	1.001314726	0	0	0
F2S4_170807_011_F01	VISp	L1-L4	GABAergic	Lamp5	4	Lamp5 Ntn1 Npy2r	Core	1.153462406	1042.730015	4.613849623	4.613849623	0	0	0	0	0	0	0	0	779.7405863	0	0	24.22271052	0	0	0
F2S4_170807_012_A01	VISp	L1-L4	GABAergic	Lamp5	4	Lamp5 Ntn1 Npy2r	Core	2.427476117	7775.206002	2.427476117	4.854952233	0	1.213738058	0	0	0	0	0	0	15.77859476	0	0	0	0	0	0
F2S4_171122_007_E01	VISp	L1-L4	GABAergic	Lamp5	4	Lamp5 Ntn1 Npy2r	Core	0	1478.383891	0	1.136344267	0	0	12.49978694	0	0	0	0	0	221.587132	0	0	0	0	0	0
F2S4_171122_008_C01	VISp	L1-L4	GABAergic	Lamp5	4	Lamp5 Ntn1 Npy2r	Core	0	698.2591214	0	0	0	0	250.6884762	0	0	0	0	0	0	0	0	0	0	0	0
F2S4_171122_008_F01	VISp	L1-L4	GABAergic	Lamp5	4	Lamp5 Ntn1 Npy2r	Core	0	1512.620638	0	1.159985152	0	0	0	0	0	0	0	0	170.5178174	0	0	110.1985895	0	0	0
F2S4_171122_008_G01	VISp	L1-L4	GABAergic	Lamp5	4	Lamp5 Ntn1 Npy2r	Core	0	522.5008894	0	85.23064153	1975.127475	0	0	0	0	0	0	0	0	0	0	0	0	0	0
F2S4_171122_009_D01	VISp	L1-L4	GABAergic	Lamp5	4	Lamp5 Ntn1 Npy2r	Core	0	971.3295883	0	93.3970758	0	0	0	0	0	0	0	0	378.5694806	0	0	0	0	0	0
F2S4_171122_009_F01	VISp	L1-L4	GABAergic	Lamp5	4	Lamp5 Ntn1 Npy2r	Intermediate	0	1489.486396	0	0	0	0	0	0	0	0	0	0	308.2395264	0	0	0	0	0	0
F2S4_171122_010_G01	VISp	L1-L4	GABAergic	Lamp5	4	Lamp5 Ntn1 Npy2r	Core	0.955583522	1277.615169	0.955583522	0.955583522	0	0	0	0	0	0	0	0	122.3146909	0	0	0	0	0	0
F2S4_171122_012_D01	VISp	L1-L4	GABAergic	Lamp5	4	Lamp5 Ntn1 Npy2r	Core	0	1232.496109	0	0	0	0	0	0	0	0	0	0	0	0	0	0	0	0	0
F2S4_171122_012_H01	VISp	L1-L4	GABAergic	Lamp5	4	Lamp5 Ntn1 Npy2r	Core	0	1986.997971	0	0	0	0	0	0	0	0	0	0	115.9659095	0	0	0	0	0	0
F2S4_171122_013_C01	VISp	L1-L4	GABAergic	Lamp5	4	Lamp5 Ntn1 Npy2r	Core	0	1061.32936	0	0	0	0	0	0	0	0	0	0	58.77227653	0	0	455.4851431	0	0	0
F2S4_171122_013_F01	VISp	L1-L4	GABAergic	Lamp5	4	Lamp5 Ntn1 Npy2r	Core	0	469.74685	0	0.968550206	0	0	46.4904099	0	0	0	0	0	0	0	0	0	0	0	0
F2S4_171122_013_H01	VISp	L1-L4	GABAergic	Lamp5	4	Lamp5 Ntn1 Npy2r	Intermediate	0	16207.6155	0	0.605914819	128.4539417	0	0	0	0	54.53233374	0	0	580.4663969	0	0	0	0	0	0
F2S4_160209_007_D01	ALM	L2/3	GABAergic	Lamp5	5	Lamp5 Plch2 Dock5	Core	17.05866606	22102.7824	0	33.46122959	0	1.312205082	0	0	0	92.51045827	0	0	296.5583485	0	0	0	0	0	0
F2S4_160209_007_H01	ALM	L2/3	GABAergic	Lamp5	5	Lamp5 Plch2 Dock5	Core	9.278661398	19124.09436	0	0	0	0	0	0	0	20.10376636	0	0	487.9029452	23.1966535	0	0	0	0	2.31966535
F2S4_160209_008_C01	ALM	L2/3	GABAergic	Lamp5	5	Lamp5 Plch2 Dock5	Core	1.797053372	13048.40453	0	286.6300128	0	0	0.898526686	0	0	21.56464046	0.898526686	0	636.1568935	0	0	0	0	0	0
F2S4_160308_001_A01	ALM	L1	GABAergic	Lamp5	5	Lamp5 Plch2 Dock5	Core	0	2813.011058	0	0.51900573	0	0	0	0	0	4.152045843	0	0	98.09208303	0	0	0.51900573	0	0	0
F2S4_160308_002_C01	ALM	L5	GABAergic	Lamp5	5	Lamp5 Plch2 Dock5	Core	2.487548266	24618.02142	0	282.9586153	0.621887067	0	0	0	0	41.66643346	62.81059372	0	502.4847498	17.41283786	0	0	0	0	0
F2S4_160308_004_E01	ALM	L2/3	GABAergic	Lamp5	5	Lamp5 Plch2 Dock5	Core	25.12647849	12679.12872	0	185.6282696	1.025570551	1.025570551	41.02282202	0	0	39.4844662	0.512785275	0	105.1209814	0	0	60.50866248	0	0	0
F2S4_160421_001_D01	ALM	L2/3	GABAergic	Lamp5	5	Lamp5 Plch2 Dock5	Intermediate	2.839315203	20179.01314	0	0	0	0	0	0	0	55.65057797	0	0	344.6928656	0	0	0	0	0	0
F2S4_160503_002_B01	ALM	L1	GABAergic	Lamp5	5	Lamp5 Plch2 Dock5	Core	3.348833649	3276.116118	0.478404807	0.478404807	0.478404807	0.956809614	0.956809614	0.478404807	0	0	0.478404807	0	146.8702758	0	0	0	0	0	0
F2S4_160503_003_F01	ALM	L1	GABAergic	Lamp5	5	Lamp5 Plch2 Dock5	Core	1.547428689	8790.942384	0.515809563	0	0.515809563	0	0.515809563	0.515809563	0	10.31619126	0	0	482.7977511	0	0	0	0	0	0
F2S4_160503_008_C01	ALM	L2/3	GABAergic	Lamp5	5	Lamp5 Plch2 Dock5	Core	3.14134481	3205.069233	0	129.6926643	0.448763544	0	0.448763544	0.448763544	0	0	0	0	382.7953032	18.84806886	0	0	0	0	0
F2S4_160505_001_F01	ALM	L1	GABAergic	Lamp5	5	Lamp5 Plch2 Dock5	Core	0.405842509	1491.065377	0.405842509	0	0	0	0	0	0	0	0	0	156.2493659	0	0	40.99009338	0	0	0
F2S4_160505_002_G01	ALM	L1	GABAergic	Lamp5	5	Lamp5 Plch2 Dock5	Core	0	6600.199302	0	0	0	0	0	0	0	17.55594494	0	0	224.0472974	0	0	0	0	0	0
F2S4_160505_003_F01	ALM	L1	GABAergic	Lamp5	5	Lamp5 Plch2 Dock5	Core	0.850408834	9369.379329	0	219.8306836	0	0	0	0	0	40.81962403	0	0	239.8152912	0	0	0	0	0	0
F2S4_160505_004_C01	ALM	L1	GABAergic	Lamp5	5	Lamp5 Plch2 Dock5	Core	0.464047244	5150.460358	0	0.464047244	0.464047244	0	0	0	0	14.38546456	0	0	395.3682517	13.45737007	0	0	0	0	0
F2S4_160505_004_G01	ALM	L1	GABAergic	Lamp5	5	Lamp5 Plch2 Dock5	Core	0	2421.621483	0	0	0	0	0	0	0	0	0	0	90.3776715	0	0	0	0	0	0
F2S4_160505_005_C01	ALM	L1	GABAergic	Lamp5	5	Lamp5 Plch2 Dock5	Core	0.47708171	5109.545117	2.862490262	27.19365748	0	0	0	0	0	27.6707392	173.6577425	0	66.31435773	0	0	0	0	0	0
F2S4_160505_005_E01	ALM	L1	GABAergic	Lamp5	5	Lamp5 Plch2 Dock5	Intermediate	5.353516487	387.2376926	1.784505496	1678.030001	0	1.18967033	0.594835165	0	0	0	0	0	662.6463741	0	0	0	0	0	0
F2S4_160505_006_A01	ALM	L1	GABAergic	Lamp5	5	Lamp5 Plch2 Dock5	Core	1.020725317	2736.564575	1.531087976	0	0	0	0	0	0	13.26942912	39.80828737	0	147.4948083	0	0	0	0	0	0
F2S4_160505_006_G01	ALM	L1	GABAergic	Lamp5	5	Lamp5 Plch2 Dock5	Core	0.631285234	2714.526505	0.631285234	80.17322467	0	0	0	0	0	0	0	0.631285234	77.64808373	0	0	0	0	0	0
F2S4_160505_011_A01	ALM	L2/3	GABAergic	Lamp5	5	Lamp5 Plch2 Dock5	Core	0.448169831	8201.956082	0	0.448169831	0	0	0	0	0	23.30483123	0	0	307.4445043	0	0	0.448169831	0.448169831	0	0
F2S4_160505_013_D01	ALM	L2/3	GABAergic	Lamp5	5	Lamp5 Plch2 Dock5	Core	1.37409636	2453.678067	0.45803212	0.45803212	0	0	0	0	0	0	0	0	24.27570236	0	0	0	0	0	0
F2S4_160505_013_F01	ALM	L2/3	GABAergic	Lamp5	5	Lamp5 Plch2 Dock5	Core	1.513929667	9773.425286	0	0.504643222	1.009286445	0	0	0	0	19.68108567	116.5725843	0	176.1204846	0	0	0	0	0	0
F2S4_160506_002_B01	ALM	L2/3	GABAergic	Lamp5	5	Lamp5 Plch2 Dock5	Core	336.5497337	5576.862682	0.86516641	0.86516641	56.66839988	80.89305938	147.0782898	0	0	3.460665642	0	0	162.6512852	0	0	19.46624423	0	0	15.14041218
F2S4_160506_014_B01	ALM	L1	GABAergic	Lamp5	5	Lamp5 Plch2 Dock5	Core	0.347672869	27416.09176	1.043018607	196.7828439	0	0	0	0.347672869	0	11.12553181	0	0	139.4168205	0	0	0	0	0	0
F2S4_160506_014_D01	ALM	L1	GABAergic	Lamp5	5	Lamp5 Plch2 Dock5	Core	0.346947796	15481.15761	2.428634573	38.85815317	0	0	0	0	0	0.346947796	0	0.346947796	155.7795605	0	0	0	0	0	0
F2S4_160517_004_H01	ALM	L2/3	GABAergic	Lamp5	5	Lamp5 Plch2 Dock5	Core	0.444049339	7463.137244	0	8.436937445	0	1.776197357	0	0	0	10.2131348	0	0	162.5220582	0	0	0	0	0	0
F2S4_160518_008_C01	ALM	L2/3	GABAergic	Lamp5	5	Lamp5 Plch2 Dock5	Core	0	6565.234875	0	174.8335183	0	0	0	0	0	0	0	0	283.9863365	0	0	0	0	0	0
F2S4_160518_009_E01	ALM	L2/3	GABAergic	Lamp5	5	Lamp5 Plch2 Dock5	Core	0.726839003	2404.74684	1.090258504	53.42266669	0.363419501	0	0	0	0	0	0	0	214.7809253	0	0	0	0	0	0
F2S4_160523_001_B01	ALM	L1	GABAergic	Lamp5	5	Lamp5 Plch2 Dock5	Core	3.299570478	8813.97764	0	0	0	0	0.41244631	0	0	0	0	0	100.6368996	25.57167121	0	0	0	0	0
F2S4_160523_004_A01	ALM	L2/3	GABAergic	Lamp5	5	Lamp5 Plch2 Dock5	Core	2.152107913	10366.08893	0	0	0	0.614887975	0	0	0	59.95157757	0	0	324.6608509	31.66673072	0	0	0	0	0
F2S4_160524_001_A01	ALM	L1	GABAergic	Lamp5	5	Lamp5 Plch2 Dock5	Core	0	3800.398702	1.252465792	100.614752	0	0	0	0.834977195	0	0	0	0	361.9626139	0	0	0	0	0	29.64169041
F2S4_160524_001_B01	ALM	L1	GABAergic	Lamp5	5	Lamp5 Plch2 Dock5	Core	0.849406583	3925.957228	0.424703292	0	0	0	0	0	0	13.16580204	0	0	163.5107673	0	0	0	0	0	0
F2S4_160524_001_G01	ALM	L1	GABAergic	Lamp5	5	Lamp5 Plch2 Dock5	Intermediate	1.078787055	3590.203319	1.797978425	20.85654973	0.359595685	0	0	0	0	0	0	0	115.0706192	0	0	131.252425	0	0	0
F2S4_160524_001_H01	ALM	L1	GABAergic	Lamp5	5	Lamp5 Plch2 Dock5	Core	0	3241.192828	2.478449878	788.7666738	0	0	22.92566137	0	0	0	0	0	530.388274	0	0	0	0	0	0
F2S4_160524_002_G01	ALM	L1	GABAergic	Lamp5	5	Lamp5 Plch2 Dock5	Core	1.044112718	15435.64037	1.566169077	0.522056359	0	1.044112718	0	0	0	10.44112718	0	0	306.9691392	0	0	0	0	0	0
F2S4_160524_002_H01	ALM	L1	GABAergic	Lamp5	5	Lamp5 Plch2 Dock5	Core	2.651640703	6052.701359	3.646005966	134.5707657	0	0	0.331455088	0	0	76.2346702	0	0	360.6231356	0	0	0	0	0	0
F2S4_160524_005_D01	ALM	L2/3	GABAergic	Lamp5	5	Lamp5 Plch2 Dock5	Core	0	13053.08139	0.655406778	0.655406778	0	0	0	0	0	16.38516946	8.520288117	0	401.1089483	0	0	0	0	0	0
F2S4_160524_005_G01	ALM	L2/3	GABAergic	Lamp5	5	Lamp5 Plch2 Dock5	Core	0.687469966	13441.41278	0	0	0	0	0	0	0	77.68410618	55.68506726	0	83.87133587	2.749879865	0	0	0	0	0
F2S4_160524_009_A01	ALM	L1	GABAergic	Lamp5	5	Lamp5 Plch2 Dock5	Core	0.363937837	12745.83091	0	129.197932	0	0	0	0	0	21.10839452	55.68248899	0	238.7432207	0	0	0	0	0	0
F2S4_160524_009_B01	ALM	L1	GABAergic	Lamp5	5	Lamp5 Plch2 Dock5	Core	0.70770006	7081.246798	0	208.0638176	0	0	0	0	0	51.66210436	0	0	421.0815355	0	0	0	0	0	0
F2S4_160524_009_C01	ALM	L1	GABAergic	Lamp5	5	Lamp5 Plch2 Dock5	Core	0	13459.31457	0.343560204	0	0	0	0.687120409	0	0	37.79162249	0	0	989.796949	0	0	0	0	0	0
F2S4_160524_013_G01	ALM	L2/3	GABAergic	Lamp5	5	Lamp5 Plch2 Dock5	Core	2.423228095	15289.76154	0	0	0	0	0	0	0	17.77033937	0	0	268.9783186	0	0	0	0	0	0
F2S4_160524_015_A01	ALM	L2/3	GABAergic	Lamp5	5	Lamp5 Plch2 Dock5	Core	1.770199749	5150.396171	2.655299624	0.885099875	0	0	16.81689762	0.885099875	0	7.080798997	0	0	412.4565416	0	0	0	0	0	0
F2S4_160524_016_D01	ALM	L2/3	GABAergic	Lamp5	5	Lamp5 Plch2 Dock5	Core	6.925383609	12204.25726	2.308461203	0	2.308461203	1.731345902	0	0	0	31.16422624	0	0	233.1545815	19.04480492	0	0	0	0	0
F2S4_160525_001_H01	ALM	L1	GABAergic	Lamp5	5	Lamp5 Plch2 Dock5	Core	0	5096.869286	2.364587931	0	0	0	0	0	0	37.04521092	0	0	61.47928621	2.364587931	0	0	0	0	0
F2S4_160525_002_C01	ALM	L1	GABAergic	Lamp5	5	Lamp5 Plch2 Dock5	Core	0.903716262	2160.785582	237.6773769	0	0.903716262	0.903716262	0	0	3.614865048	0.903716262	0	0	237.6773769	0	0	0	0	0	0
F2S4_160525_008_A01	ALM	L2/3	GABAergic	Lamp5	5	Lamp5 Plch2 Dock5	Core	3.808152874	15270.05833	1.269384291	0	0	0	0	0.634692146	0	9.520382186	0	0	187.234183	0	0	0	0	0	0
F2S4_160525_019_C01	ALM	L2/3	GABAergic	Lamp5	5	Lamp5 Plch2 Dock5	Core	2.304739582	33043.05138	1.728554686	177.4649478	142.3176692	0	0.576184895	0	0	20.16647134	0	0	83.54680984	0	0	0	0	0	0
F2S4_160525_022_B01	ALM	L1	GABAergic	Lamp5	5	Lamp5 Plch2 Dock5	Core	1.238912507	4977.330998	0.619456254	78.67094422	0	0	0	0	0	19.20314386	0	0	302.9141081	0	0	3.097281268	0	0	0
F2S4_160525_022_C01	ALM	L1	GABAergic	Lamp5	5	Lamp5 Plch2 Dock5	Core	1.188122576	2927.534028	0	1.188122576	0	0.594061288	0	0	0	0	0	0	22.57432895	0	0	0	0	0	0
F2S4_160525_022_D01	ALM	L1	GABAergic	Lamp5	5	Lamp5 Plch2 Dock5	Core	3.596848441	8610.855169	3.596848441	0	0	0	0	0	0	0	0	0	207.4182601	0	0	0	0	0	0
F2S4_160526_007_D01	ALM	L1	GABAergic	Lamp5	5	Lamp5 Plch2 Dock5	Core	5.109666211	4465.848268	0	0	0	0	0	0	0	0	0	0	295.8496736	0	0	0	0	0	0
F2S4_160526_007_G01	ALM	L1	GABAergic	Lamp5	5	Lamp5 Plch2 Dock5	Core	0.436362811	5210.608329	0	84.21802257	0	0.436362811	0	0.436362811	0	0	0	0	273.5994826	0	0	0	0	0	0
F2S4_160526_008_A01	ALM	L1	GABAergic	Lamp5	5	Lamp5 Plch2 Dock5	Core	1.010430165	6281.844338	0	0	0	0	0	0	0	238.461519	0.505215083	0	667.3891242	0	0	0	0	0	0
F2S4_160526_008_C01	ALM	L1	GABAergic	Lamp5	5	Lamp5 Plch2 Dock5	Core	0.430923409	6965.445976	0	0	0	0.430923409	0	0	0	51.27988562	126.6914821	0	945.8768817	0.430923409	0	0	0	0	0
F2S4_160526_008_D01	ALM	L1	GABAergic	Lamp5	5	Lamp5 Plch2 Dock5	Core	0.659994126	4949.295951	0.659994126	0	0	0.659994126	0	0	0	34.97968868	0	0	222.4180205	0	0	0	0	0	0
F2S4_160526_008_F01	ALM	L1	GABAergic	Lamp5	5	Lamp5 Plch2 Dock5	Core	0.402364293	4378.930596	1.60945717	0	0	0	0	0	0	0	33.79860058	0	304.9921338	0	0	0	0	0	0
F2S4_160526_008_H01	ALM	L1	GABAergic	Lamp5	5	Lamp5 Plch2 Dock5	Core	0	4224.829238	0.871458176	0	0	0	0	0	0	0	0	0	328.5397324	0	0	0	0	0	0
F2S4_160526_009_C01	ALM	L1	GABAergic	Lamp5	5	Lamp5 Plch2 Dock5	Core	0	3347.877238	0	99.30615383	0	0	0.37054535	0	0	0	0	0	936.3680998	0	0	0	0	0	0
F2S4_160526_009_D01	ALM	L1	GABAergic	Lamp5	5	Lamp5 Plch2 Dock5	Core	0.84864177	6914.733142	0.84864177	34.36999169	0	0.424320885	0	0	0	0	0	0	224.4657482	0	0	0	0	0	0
F2S4_160526_018_G01	ALM	L2/3	GABAergic	Lamp5	5	Lamp5 Plch2 Dock5	Core	1.242257115	5151.640256	1.242257115	0.414085705	0	0	0	0	0	39.33814197	13.66482826	0	349.488335	0	0	0	0	0	0
F2S4_160526_018_H01	ALM	L2/3	GABAergic	Lamp5	5	Lamp5 Plch2 Dock5	Core	3.244155552	1708.858937	0	0.811038888	0	0	0	0.405519444	0	0	0	0	248.1778998	2.02759722	0	27.5753222	0	0	20.68149165
F2S4_160526_022_B01	ALM	L2/3	GABAergic	Lamp5	5	Lamp5 Plch2 Dock5	Core	2.330503636	4828.803533	0	0.466100727	0	0.466100727	0	0	0	9.78811527	0	0	110.4658723	0	0	17.24572691	0	0	0
F2S4_160531_006_G01	ALM	L2/3	GABAergic	Lamp5	5	Lamp5 Plch2 Dock5	Core	5.683915202	8506.926419	0	0	0	0.75785536	0	0.37892768	0	27.66172065	0	0	400.5265579	28.79850369	0	0	0	0	0
F2S4_160531_007_B01	ALM	L2/3	GABAergic	Lamp5	5	Lamp5 Plch2 Dock5	Core	8.69358439	8892.514057	0	0	0	0	1.534161951	0	0	11.76190829	0.511387317	0	275.6377639	0.511387317	0	65.9689639	0	0	0
F2S4_160531_008_D01	ALM	L1	GABAergic	Lamp5	5	Lamp5 Plch2 Dock5	Intermediate	6.409927696	6308.437174	0.534160641	1.068321283	2.136642565	1.068321283	0	0	0	0	0	0	214.7325778	0	0	0	0	0	0
F2S4_160531_009_G01	ALM	L1	GABAergic	Lamp5	5	Lamp5 Plch2 Dock5	Core	0	4862.461886	2.622333497	0	0.655583374	1.311166748	0.655583374	0	0	20.97866797	0	0	64.24717067	0	0	0	0	0	0
F2S4_160531_009_H01	ALM	L1	GABAergic	Lamp5	5	Lamp5 Plch2 Dock5	Core	2.66964813	15081.91014	0	166.0521137	0	0	0	0	0	24.02683317	0	0	138.8217027	0	0	85.42874015	0	0	0
F2S4_160531_011_C01	ALM	L1	GABAergic	Lamp5	5	Lamp5 Plch2 Dock5	Core	1.020147401	8204.0254	0	0	0	0	0	0	0	7.141031808	0	0	163.2235842	0	0	0	0	0	0
F2S4_160531_012_H01	ALM	L1	GABAergic	Lamp5	5	Lamp5 Plch2 Dock5	Core	5.056732932	6464.671858	0	3.611952094	1.444780838	0	0	0	0	0	0	0	250.6694753	0	0	0	0	0	0
F2S4_160531_018_B01	ALM	L1	GABAergic	Lamp5	5	Lamp5 Plch2 Dock5	Core	3.124207232	6451.487935	2.499365786	0	0	0	0.624841446	0	0	0	0	0	129.3421794	0	0	0	0	0	0
F2S4_160531_018_C01	ALM	L1	GABAergic	Lamp5	5	Lamp5 Plch2 Dock5	Core	1.005782242	2062.356487	1.005782242	113.1505022	0	5.028911211	0	0	0	0.502891121	0	0	275.0814432	0	0	0	0	0	0
F2S4_160531_019_C01	ALM	L1	GABAergic	Lamp5	5	Lamp5 Plch2 Dock5	Core	0	2790.856987	0	0	0	0	0	0.582520765	0	11.65041531	10.48537378	0	209.7074755	9.320332247	0	0	0	0	0
F2S4_160531_019_E01	ALM	L1	GABAergic	Lamp5	5	Lamp5 Plch2 Dock5	Core	1.160083387	5378.726623	2.900208467	0	0	0	0.580041693	0	0	23.20166774	0	0	215.7755099	3.48025016	0	0	0	0	0
F2S4_160531_019_F01	ALM	L1	GABAergic	Lamp5	5	Lamp5 Plch2 Dock5	Core	1.198483918	5325.463289	2.396967836	0	0.599241959	0	1.198483918	0	0	11.98483918	0	0	12.58408114	67.71434136	0	0	0	0	0
F2S4_160531_020_A01	ALM	L1	GABAergic	Lamp5	5	Lamp5 Plch2 Dock5	Core	1.101493239	2345.079106	0	0	1.101493239	0	0	0	0	0	0	0	23.13135803	0	0	0	0	0	0
F2S4_160601_001_B01	ALM	L1	GABAergic	Lamp5	5	Lamp5 Plch2 Dock5	Core	4.907529868	3786.159294	0.981505974	131.5218005	0.981505974	0.490752987	0	0.490752987	0	45.64002778	0.490752987	0	229.1816449	0	0	0	0	0	0
F2S4_160601_001_D01	ALM	L1	GABAergic	Lamp5	5	Lamp5 Plch2 Dock5	Core	4.608687837	4248.6341	0	42.6303625	0.57608598	0	0	1.152171959	0	9.217375675	0	0	434.9449147	12.67389155	0	0	0	0	0
F2S4_160601_001_E01	ALM	L1	GABAergic	Lamp5	5	Lamp5 Plch2 Dock5	Core	30.68272908	5568.915327	0	341.345361	0	0	3.835341134	1.917670567	0	93.96585779	0	0	839.9397084	0	0	0	0	0	0
F2S4_160601_001_H01	ALM	L1	GABAergic	Lamp5	5	Lamp5 Plch2 Dock5	Intermediate	14.12509869	5589.642503	0.487072369	41.88822371	1.461217106	1.461217106	0.487072369	0	0	15.5863158	0.487072369	0	104.2334869	0	0	0	0	0	0
F2S4_160601_002_F01	ALM	L1	GABAergic	Lamp5	5	Lamp5 Plch2 Dock5	Core	6.837473261	2309.600789	4.395518525	0.488390947	0.488390947	0.488390947	0.488390947	0.488390947	0	0	0	0	281.8015765	0	0	0	0	0	0
F2S4_160601_002_G01	ALM	L1	GABAergic	Lamp5	5	Lamp5 Plch2 Dock5	Core	5.77313874	1569.812642	0.481094895	16.35722643	0	0.481094895	0.481094895	0.96218979	0	0	0	0	195.3245274	0	0	0	0	0	0
F2S4_160601_005_F01	ALM	L2/3	GABAergic	Lamp5	5	Lamp5 Plch2 Dock5	Core	8.741537099	21579.73312	3.746373043	0	0.624395507	0.624395507	0.624395507	0	0	143.6109666	34.34175289	0	464.5502573	0	0	0	0	0	0
F2S4_160601_009_E01	ALM	L2/3	GABAergic	Lamp5	5	Lamp5 Plch2 Dock5	Core	24.44616699	21305.34383	2.546475729	1.527885437	0.509295146	0.509295146	0	0	0.509295146	67.73625438	70.28273011	0	434.9380544	0	0	0	0	0	0
F2S4_160601_009_G01	ALM	L2/3	GABAergic	Lamp5	5	Lamp5 Plch2 Dock5	Core	0.54738762	8664.051249	6.568651439	30.1063191	0	0	45.43317246	0	0	77.72904203	0	0	681.4975868	26.27460576	0	0	0	0	0
F2S4_160601_010_G01	ALM	L2/3	GABAergic	Lamp5	5	Lamp5 Plch2 Dock5	Core	0.487050781	3296.846736	2.435253904	18.02087889	0	0	0	0.487050781	0	0	0	0	463.6723434	0	0	0	0	0	0
F2S4_160601_014_B01	ALM	L1	GABAergic	Lamp5	5	Lamp5 Plch2 Dock5	Core	1.734164191	15554.87474	0.57805473	167.057817	1.15610946	0	0	0	0	70.52267709	0	0	136.4209163	0	0	0	0	0	0
F2S4_160601_015_A01	ALM	L1	GABAergic	Lamp5	5	Lamp5 Plch2 Dock5	Core	0	1915.395695	0	0	0	1.135049301	0	0	0	0	0	0	379.6739911	0	0	0	0	0	0
F2S4_160601_016_E01	ALM	L1	GABAergic	Lamp5	5	Lamp5 Plch2 Dock5	Core	25.79334373	4136.855514	0.496025841	0	0	0.496025841	0	0	0	0	0	0	239.0844553	0	0	0	0	0	0
F2S4_160601_017_H01	ALM	L1	GABAergic	Lamp5	5	Lamp5 Plch2 Dock5	Core	2.297148045	4562.136017	0	0.459429609	0	1.378288827	0.459429609	0	0	8.72916257	0	0	96.93964749	0	0	0	0	0	0
F2S4_160601_018_F01	ALM	L1	GABAergic	Lamp5	5	Lamp5 Plch2 Dock5	Core	2.766201226	9786.819936	1.659720735	0	1.659720735	0	0.553240245	0	0	17.1504476	0	0	333.6038678	1.10648049	0	0	0	0	0
F2S4_160602_001_B01	ALM	L1	GABAergic	Lamp5	5	Lamp5 Plch2 Dock5	Core	0	1855.980678	0	25.52109182	0	0	0	0	0	0	0	0	230.7758303	9.774035167	0	0	0	0	0
F2S4_160602_001_H01	ALM	L1	GABAergic	Lamp5	5	Lamp5 Plch2 Dock5	Core	0	6635.469968	0	0	0	0	0	0	0	0	0	0	145.2477853	0	0	0	0	0	0
F2S4_160602_002_F01	ALM	L1	GABAergic	Lamp5	5	Lamp5 Plch2 Dock5	Core	1.996116555	6756.854539	0	30.44077747	0	0	0	0	0	0	0	0	198.1145681	0	0	53.39611785	0	0	0
F2S4_160602_006_A01	ALM	L2/3	GABAergic	Lamp5	5	Lamp5 Plch2 Dock5	Core	1.253030768	13191.49025	0	1.253030768	0	1.253030768	0.417676923	0	0	0	58.8924461	0	231.3930152	0	0	0	0	0	0
F2S4_160602_010_B01	ALM	L5	GABAergic	Lamp5	5	Lamp5 Plch2 Dock5	Core	0.560628307	59861.08752	0	0.560628307	0	0.560628307	0	0	0	203.5080756	68.3966535	0	1390.358202	18.50073414	0	0	0	0	0
F2S4_160602_014_A01	ALM	L1	GABAergic	Lamp5	5	Lamp5 Plch2 Dock5	Core	3.047994328	8948.301749	2.438395463	1.828796597	0	0	0	0	0	0	92.65902758	0	288.9498623	105.4606038	0	0	0	0	0
F2S4_160602_014_C01	ALM	L1	GABAergic	Lamp5	5	Lamp5 Plch2 Dock5	Core	0	3798.507095	1.027039907	1.54055986	0	0	0	0	0	0	0	0	281.4089344	0	0	0	0	0	0
F2S4_160602_014_D01	ALM	L1	GABAergic	Lamp5	5	Lamp5 Plch2 Dock5	Core	0.457985131	2120.471157	0.457985131	11.44962828	0	0	0	0	0	0.457985131	0	0	44.88254284	0	0	0	0	0	0
F2S4_160602_014_E01	ALM	L1	GABAergic	Lamp5	5	Lamp5 Plch2 Dock5	Core	6.455232692	10012.06591	1.075872115	209.2571264	0	0	1.075872115	0	0	0	0	0	98.98023462	16.13808173	0	0	0	0	0
F2S4_160602_014_F01	ALM	L1	GABAergic	Lamp5	5	Lamp5 Plch2 Dock5	Core	6.261521852	6748.87697	0.521793488	0	0	0	0	0	0	0	0	0	163.3213617	0	0	0	0	0	0
F2S4_160613_003_B01	ALM	L1	GABAergic	Lamp5	5	Lamp5 Plch2 Dock5	Core	0	1957.44882	0	0	0	0	0	0	0	0	0	0	232.7121817	0	0	0	0	0	10.30236221
F2S4_160613_003_D01	ALM	L1	GABAergic	Lamp5	5	Lamp5 Plch2 Dock5	Core	0	5568.046613	0	16.48101229	0	0	0	0	0	0	0	0	322.6475098	0	0	0	0	0	0
F2S4_160613_003_G01	ALM	L1	GABAergic	Lamp5	5	Lamp5 Plch2 Dock5	Core	0	4049.864746	0	76.00152584	0	0	0.484086152	0	0	0	0	0	164.1052055	0	0	0	0	0	0
F2S4_160613_004_F01	ALM	L1	GABAergic	Lamp5	5	Lamp5 Plch2 Dock5	Core	0.558352592	8104.487871	1.116705184	0	0	0	0	0	0	18.42563553	80.40277323	0	169.7391879	0	0	0	0	0	0
F2S4_160613_005_C01	ALM	L1	GABAergic	Lamp5	5	Lamp5 Plch2 Dock5	Core	0	4107.180668	0	0	0	0	0	0	0	35.93221644	0	0	0	0	0	0	0	0	0
F2S4_160613_005_E01	ALM	L1	GABAergic	Lamp5	5	Lamp5 Plch2 Dock5	Core	2.68634504	2732.684491	0.67158626	24.84869162	0	0.67158626	0	0	0	0	0	0	177.2987726	0	6.044276339	0	0	0	0
F2S4_160613_005_G01	ALM	L1	GABAergic	Lamp5	5	Lamp5 Plch2 Dock5	Core	0.515747047	4438.519084	0	117.0745796	0	0	0	0	0	0	0	0	0	30.9448228	0	0	0	0	0
F2S4_160613_006_C01	ALM	L1	GABAergic	Lamp5	5	Lamp5 Plch2 Dock5	Core	2.566573714	3769.013499	0	20.53258971	0	0	0	0	0	14.11615543	0	0	137.3116937	0	0	79.56378513	0	0	0
F2S4_160613_007_E01	ALM	L5	GABAergic	Lamp5	5	Lamp5 Plch2 Dock5	Core	1.511047647	17275.05223	0	299.942958	0	0	0	0	0	40.79828647	0	0	319.5865774	0	0	0	0	0	0
F2S4_160613_012_F01	ALM	L2/3	GABAergic	Lamp5	5	Lamp5 Plch2 Dock5	Core	0	17161.895	1.228701987	0	0	0	0.614350993	0.614350993	0	70.03601326	0	0	232.2246755	11.05831788	0	0	0	0	0
F2S4_160620_003_B01	ALM	L2/3	GABAergic	Lamp5	5	Lamp5 Plch2 Dock5	Core	0.357262157	27774.63189	0.714524314	644.8581937	0	0	0	0	0	1.786310786	195.4224	0	150.4073682	20.0066808	0	0	0	0	0
F2S4_160620_013_H01	ALM	L2/3	GABAergic	Lamp5	5	Lamp5 Plch2 Dock5	Core	0.51426917	5574.677798	0.51426917	0	0	0	1.542807509	0	0	0	0	0	114.6820248	0	0	0	0	0	0
F2S4_160620_014_G01	ALM	L2/3	GABAergic	Lamp5	5	Lamp5 Plch2 Dock5	Core	1.678027847	14338.74796	1.678027847	89.49481853	0.559342616	0	0	0	0	40.27266834	45.8660945	0	262.3316868	4.474740926	0	0	0	0	0
F2S4_160620_016_D01	ALM	L2/3	GABAergic	Lamp5	5	Lamp5 Plch2 Dock5	Core	1.949517251	4319.642848	0.487379313	0.487379313	0	0.487379313	2.924275876	0	0	0	0	0	649.6766238	0	0	0	0	0	0
F2S4_160623_028_B01	ALM	L2/3	GABAergic	Lamp5	5	Lamp5 Plch2 Dock5	Core	2.063004147	34159.91033	0	1.375336098	0	0	0.687668049	0	0	275.0672196	35.75873854	0	224.1797839	0	0	0	0	0	0
F2S4_160629_013_A01	ALM	L1	GABAergic	Lamp5	5	Lamp5 Plch2 Dock5	Core	0	4089.544526	0	128.1549731	0	0	0	0	0	0	0	0	92.35459599	0	0	0	0	0	0
F2S4_160629_015_A01	ALM	L1	GABAergic	Lamp5	5	Lamp5 Plch2 Dock5	Core	0	10954.12537	0	0	0	0	0	0	0	73.21052877	219.6315863	0	409.9789611	7.321052877	0	0	0	0	0
F2S4_160629_015_D01	ALM	L1	GABAergic	Lamp5	5	Lamp5 Plch2 Dock5	Core	0	14837.90749	0	0	0	0	0	0	0	124.2332314	0	0	470.3873635	0	0	0	0	0	0
F2S4_160629_015_E01	ALM	L1	GABAergic	Lamp5	5	Lamp5 Plch2 Dock5	Core	0	7380.671531	0	0	0.470886279	0	0	0	0	0	0	0	455.3470314	0	0	0	0	0	0
F2S4_160629_015_G01	ALM	L1	GABAergic	Lamp5	5	Lamp5 Plch2 Dock5	Core	0	5494.142299	0	0	0	0	0	0	0	0	0	0	28.64401439	0	0	0	0	0	0
F2S4_160629_016_B01	ALM	L1	GABAergic	Lamp5	5	Lamp5 Plch2 Dock5	Core	0	4619.122607	0	0	0	0	0	0	0	0	0	0	225.0354382	0	0	4.422093763	0	0	0
F2S4_160629_016_D01	ALM	L1	GABAergic	Lamp5	5	Lamp5 Plch2 Dock5	Core	0.571913554	4849.826939	0	0.571913554	0	0	0	0	0	51.47221987	86.35894667	0	420.9283758	0	0	0	0	0	0
F2S4_160629_016_G01	ALM	L1	GABAergic	Lamp5	5	Lamp5 Plch2 Dock5	Core	0.636436769	3093.719133	0	0.636436769	0	0	0	0	0	7.637241225	0	0	178.838732	0.636436769	31.82183844	0	0	0	0
F2S4_160629_017_C01	ALM	L1	GABAergic	Lamp5	5	Lamp5 Plch2 Dock5	Core	0.514232146	3693.215272	0	0	0	0	0	0	0	0	0	0	313.1673769	0	0	67.36441112	0	0	0
F2S4_160629_018_B01	ALM	L1	GABAergic	Lamp5	5	Lamp5 Plch2 Dock5	Core	0.554727163	9596.225193	0	0	0	0.554727163	0	0	0	28.84581248	0	0	0	0	0	0	0	0	0
F2S4_160629_018_D01	ALM	L1	GABAergic	Lamp5	5	Lamp5 Plch2 Dock5	Core	0	3125.448541	0	0	0	0	0	0	0	0	0	0	74.93698088	0	0	52.45588662	0	0	0
F2S4_160629_018_E01	ALM	L1	GABAergic	Lamp5	5	Lamp5 Plch2 Dock5	Core	3.140011216	8817.779497	0	386.2213796	0	0.628002243	0	0	0	0	0	0	109.2723903	0	0	0	0	0	0
F2S4_160629_018_F01	ALM	L1	GABAergic	Lamp5	5	Lamp5 Plch2 Dock5	Core	1.87494258	9309.089909	0	661.2297498	0.62498086	0	0	0	0	31.249043	0	0	426.8619274	0	0	0	0	0	0
F2S4_160629_019_A01	ALM	L1	GABAergic	Lamp5	5	Lamp5 Plch2 Dock5	Core	0	4076.293389	0	99.52508535	0	0	0	0	0	0	57.70337395	0	167.2868456	1.058777504	0	0	0	0	0
F2S4_160629_019_E01	ALM	L1	GABAergic	Lamp5	5	Lamp5 Plch2 Dock5	Core	4.288488785	3273.189065	0	0	0	0	0	0	0	10.72122196	0	0	265.3502436	12.32940526	0	0	0	0	0
F2S4_160629_019_F01	ALM	L1	GABAergic	Lamp5	5	Lamp5 Plch2 Dock5	Core	0	6354.269465	0	1.232044492	0	0	0	0	0	68.99449153	25.87293432	0	288.9144333	0	0	0	0	0	0
F2S4_160630_001_A01	ALM	L1	GABAergic	Lamp5	5	Lamp5 Plch2 Dock5	Core	0	7147.188528	0	0.469345188	0	0	0	0	0	19.24315272	154.8839122	0	226.2243808	0	0	0	0	0	0
F2S4_160630_001_E01	ALM	L1	GABAergic	Lamp5	5	Lamp5 Plch2 Dock5	Core	19.45743188	5588.554095	0	48.88086547	0	0	0	0.474571509	0	17.55914585	0	0	438.0295032	0	0	0	0	0	0
F2S4_160630_001_F01	ALM	L1	GABAergic	Lamp5	5	Lamp5 Plch2 Dock5	Core	0.504495305	9839.676437	0	68.61136154	0	0	0	0	0	13.11687794	0	0	587.7370308	0	0	0	0	0	0
F2S4_160630_001_G01	ALM	L1	GABAergic	Lamp5	5	Lamp5 Plch2 Dock5	Core	0.544358406	11629.12862	0	1511.683292	0	0	0	0	0	66.95608389	0	0	392.4824104	0	0	0	0	0	0
F2S4_160630_002_D01	ALM	L1	GABAergic	Lamp5	5	Lamp5 Plch2 Dock5	Core	0.491904482	2659.727534	0.491904482	8.362376194	0	0	0.491904482	0	0	0.491904482	0	0	257.7579486	0	0	0	0	0	0
F2S4_160630_003_B01	ALM	L1	GABAergic	Lamp5	5	Lamp5 Plch2 Dock5	Core	1.921900375	6576.743084	0	135.1736597	0	0	0	0	0	0	0	0	101.2200864	0	0	0	0	0	0
F2S4_160630_004_C01	ALM	L1	GABAergic	Lamp5	5	Lamp5 Plch2 Dock5	Core	0.535459178	11328.17436	0	570.7994834	0	0.535459178	0	0	0	0	0	0	450.3211684	0	0	0	0	0	0
F2S4_160706_048_A01	ALM	L5	GABAergic	Lamp5	5	Lamp5 Plch2 Dock5	Core	0	9289.891916	0	0	0	6.873255339	0	0	0	33.90805967	0	0	223.609907	0	0	0	0	0	0
F2S4_160707_001_C01	ALM	L1	GABAergic	Lamp5	5	Lamp5 Plch2 Dock5	Core	0	6235.876619	0	0	0	0	0.630332217	0	0	0	0	0	294.9954774	0	0	0	0	0	0
F2S4_160707_003_D01	ALM	L1	GABAergic	Lamp5	5	Lamp5 Plch2 Dock5	Core	2.868051697	2242.099414	0	44.4548013	0.717012924	0	0	0	0	0	0	0	195.0275154	0	0	0	0	0	0
F2S4_160707_004_B01	ALM	L1	GABAergic	Lamp5	5	Lamp5 Plch2 Dock5	Core	0	4965.978853	2.078685162	0	0	0	0	0	0	20.09395657	92.1550422	0	175.9953437	0	0	0	0	0	0
F2S4_160707_004_E01	ALM	L1	GABAergic	Lamp5	5	Lamp5 Plch2 Dock5	Core	3.516388716	6078.66396	0	117.799022	0	0	0	0	0	0	0	0	168.2005936	13.47949008	0	0	0	0	0
F2S4_160707_004_G01	ALM	L1	GABAergic	Lamp5	5	Lamp5 Plch2 Dock5	Core	0	2903.686462	0	21.48727982	0	0	0	0.580737292	0	0	0	0	239.2637645	0	0	0	0	0	0
F2S4_160707_004_H01	ALM	L1	GABAergic	Lamp5	5	Lamp5 Plch2 Dock5	Core	0	4959.57077	0.755686541	0	0	0	0	0	0	0	0	0	13.60235774	0	0	0	0	0	0
F2S4_160707_007_D01	ALM	L1	GABAergic	Lamp5	5	Lamp5 Plch2 Dock5	Core	0	16519.7956	0	938.3491791	0	0	0	0	0	40.41705007	0	0	57.9311051	0	0	0	0	0	0
F2S4_160707_007_E01	ALM	L1	GABAergic	Lamp5	5	Lamp5 Plch2 Dock5	Core	0	1762.076234	0	1.358578438	0	0	0.679289219	0	0	0	0	0	218.7311285	0	0	0	0	0	0
F2S4_160708_004_C01	ALM	L1	GABAergic	Lamp5	5	Lamp5 Plch2 Dock5	Core	0	26810.75833	1.251085317	0	0	0	0	0	0	0	0	0	128.8617876	0	0	0	0	0	0
F2S4_160721_002_C01	ALM	L1	GABAergic	Lamp5	5	Lamp5 Plch2 Dock5	Core	0.600603847	5612.042347	0	149.5503579	0	0	0	0	0	11.4114731	0	0	366.3683467	0	0	0	0	0	0
F2S4_160721_004_B01	ALM	L1	GABAergic	Lamp5	5	Lamp5 Plch2 Dock5	Core	0.644250611	8395.229711	0	92.77208797	0	0	0	0	0	0	34.78953299	0	5.154004887	0	0	0	0	0	0
F2S4_160721_004_D01	ALM	L1	GABAergic	Lamp5	5	Lamp5 Plch2 Dock5	Core	0	1609.609707	0	23.27707458	0	0	0	0	0	0	0	0	295.6188472	0	0	89.03481028	0	0	0
F2S4_160721_004_E01	ALM	L1	GABAergic	Lamp5	5	Lamp5 Plch2 Dock5	Core	1.99280597	15491.40935	0.664268657	227.8441493	0.664268657	0.664268657	0	0	0	140.8249552	0	0	187.3237612	0	0	0	0	0	0
F2S4_160721_005_A01	ALM	L1	GABAergic	Lamp5	5	Lamp5 Plch2 Dock5	Core	0	20079.67214	0	450.3748403	0	0	0	0	0	38.68250163	0	0	47.66236807	0	0	0	0	0	0
F2S4_160721_005_G01	ALM	L1	GABAergic	Lamp5	5	Lamp5 Plch2 Dock5	Core	0.590204146	18195.99381	0	109.187767	0	0	0	0	0	103.2857255	0	0	216.0147173	0	0	0	0	0	0
F2S4_160721_006_D01	ALM	L1	GABAergic	Lamp5	5	Lamp5 Plch2 Dock5	Core	0	24953.26952	0	0	0	0.645671579	0	0	0	99.43342319	0	0	282.1584801	0	0	0	0	0	0
F2S4_160725_001_B01	ALM	L1	GABAergic	Lamp5	5	Lamp5 Plch2 Dock5	Core	4.587310276	14690.60631	0	23.95595367	1.019402284	0	0	0	0	56.57682674	0	0	129.46409	0	0	0	0	0	0
F2S4_160725_001_E01	ALM	L1	GABAergic	Lamp5	5	Lamp5 Plch2 Dock5	Core	16.84851657	4307.428564	0.526516143	0	1.053032285	0	0.526516143	0	0	49.49251742	0	0	462.2811733	0	0	0	0	0	0
F2S4_160725_001_H01	ALM	L1	GABAergic	Lamp5	5	Lamp5 Plch2 Dock5	Core	0.537576605	6097.731427	0.537576605	1.075153209	0	0.537576605	0	0	0	9.138802279	0	0	548.3281368	0	0	0	0	0	0
F2S4_160725_002_A01	ALM	L1	GABAergic	Lamp5	5	Lamp5 Plch2 Dock5	Core	3.159373989	18411.56786	1.263749596	136.4849563	0	0.631874798	0.631874798	0	0	79.61622452	0	0	428.4111129	0	0	0	0	0	0
F2S4_160808_019_G01	ALM	L5	GABAergic	Lamp5	5	Lamp5 Plch2 Dock5	Core	0.712688274	12241.1338	0	0	0	0	0	0	0	0	17.81720686	0	16.39183031	0	0	0	0	0	0
F2S4_160808_019_H01	ALM	L5	GABAergic	Lamp5	5	Lamp5 Plch2 Dock5	Core	0.711184948	25247.06565	0	0.711184948	0	0	0	0	0	29.86976781	70.40730984	0	108.811297	0	0.711184948	0	0	0	0
F2S4_160808_020_D01	ALM	L5	GABAergic	Lamp5	5	Lamp5 Plch2 Dock5	Core	0	15708.36013	0	0	0	0	0	0	0	16.95909325	0	0	132.8462305	0	0	0	0	0	0
F2S4_160819_001_B01	ALM	L1	GABAergic	Lamp5	5	Lamp5 Plch2 Dock5	Core	0	5487.426183	0	70.00073685	0	0	0	0	0	28.94767313	0	0	360.5301108	0	0	0	0	0	0
F2S4_160819_002_F01	ALM	L1	GABAergic	Lamp5	5	Lamp5 Plch2 Dock5	Core	2.484455075	6057.722587	0.621113769	79.5025624	0.621113769	0	1.242227538	0	0	15.52784422	0	0	283.8489923	0	0	0	0	0	0
F2S4_160819_002_G01	ALM	L1	GABAergic	Lamp5	5	Lamp5 Plch2 Dock5	Core	0	4967.502938	2.212942616	1.106471308	0	0	0	0	0	15.49059831	0	0	440.9288163	0	0	0	0	0	0
F2S4_160819_004_H01	ALM	L1	GABAergic	Lamp5	5	Lamp5 Plch2 Dock5	Core	0	5347.246831	0.568795536	77.35619285	0	0	0	0	0	43.79725624	0	0.568795536	146.7492482	0	0	0	0	0	0
F2S4_160819_005_D01	ALM	L1	GABAergic	Lamp5	5	Lamp5 Plch2 Dock5	Core	1.727131626	15263.23789	0	0	0	0	0	0	0	46.05684336	132.4134246	0	48.35968552	0	0	0	0	0	0
F2S4_160819_007_A01	ALM	L1	GABAergic	Lamp5	5	Lamp5 Plch2 Dock5	Core	1.308588792	7757.314357	0	270.2235855	0	0	0	0	0	0.654294396	0	0	253.8662256	0	0	0	0	0	0
F2S4_160819_007_H01	ALM	L1	GABAergic	Lamp5	5	Lamp5 Plch2 Dock5	Core	3.683035057	11054.99803	0	114.9106938	0	0	0	0.736607011	0	0	0	0	68.50445205	0	0	0	0	0	0
F2S4_160819_009_A01	ALM	L1	GABAergic	Lamp5	5	Lamp5 Plch2 Dock5	Core	0.611206969	10496.25727	0	0	0.611206969	0	30.56034844	0	0	26.89310662	0	0	121.6301868	0	0	0	0	0	0
F2S4_160819_011_A01	ALM	L1	GABAergic	Lamp5	5	Lamp5 Plch2 Dock5	Core	0.647148663	5607.543165	0	0	0.647148663	0	0	0	0	16.17871657	0	0	33.00458181	0	0	0	0	0	0
F2S4_160819_011_D01	ALM	L1	GABAergic	Lamp5	5	Lamp5 Plch2 Dock5	Core	0.624231805	6879.65872	0	0.624231805	0.624231805	0	0	0	0	19.97541775	0	0	156.0579512	0	0	0	0	0	0
F2S4_160819_011_E01	ALM	L1	GABAergic	Lamp5	5	Lamp5 Plch2 Dock5	Core	9.234913779	7350.331731	0	1.978910095	0.659636698	0	1.978910095	1.319273397	0	23.74692115	0	0	170.8459049	36.28001842	0	0	0	0	0
F2S4_160819_011_F01	ALM	L1	GABAergic	Lamp5	5	Lamp5 Plch2 Dock5	Core	0	7264.863848	0	0.691760031	0.691760031	0	0	2.075280094	0	74.01832334	0	0	303.6826537	0	0	0	0	0	0
F2S4_160819_013_G01	ALM	L1	GABAergic	Lamp5	5	Lamp5 Plch2 Dock5	Intermediate	6.635008828	19950.80804	0	593.1697892	0.663500883	1.327001766	0	0.663500883	0	5.971507945	0	0	263.4098505	0	0	0	0	0	0
F2S4_160819_014_A01	ALM	L1	GABAergic	Lamp5	5	Lamp5 Plch2 Dock5	Core	0	9227.775172	0	0.520079759	0	0	0	0	0	43.16662003	0	0	41.60638075	0	0	0	0	0	0
F2S4_160819_014_B01	ALM	L1	GABAergic	Lamp5	5	Lamp5 Plch2 Dock5	Core	0	5170.307632	0	46.98360008	0	0	0	0	0	0	0	0	366.3664995	0	0	0	0	0	0
F2S4_160819_014_D01	ALM	L1	GABAergic	Lamp5	5	Lamp5 Plch2 Dock5	Core	1.149486065	9779.252696	2.873715162	93.10837125	0.574743032	0	0	0	0	16.09280491	0	0	79.8892815	24.71395039	0	0	0	0	0
F2S4_160819_015_H01	ALM	L1	GABAergic	Lamp5	5	Lamp5 Plch2 Dock5	Core	3.959114227	6207.891109	0	37.61158516	0	0	0	0	0	0	0	0	224.1848431	0	0	0	0	0	0
F2S4_160819_016_E01	ALM	L1	GABAergic	Lamp5	5	Lamp5 Plch2 Dock5	Core	0.575706896	6876.818874	0	1.151413792	0.575706896	0.575706896	0	0	0	0	0	0	79.44755166	0	0	0	0	0	0
F2S4_160819_016_H01	ALM	L1	GABAergic	Lamp5	5	Lamp5 Plch2 Dock5	Intermediate	0	12481.99377	0	594.7608158	0	0	0	0	0	46.40331869	0	0	213.555058	0	0	0	0	0	0
F2S4_160819_017_H01	ALM	L1	GABAergic	Lamp5	5	Lamp5 Plch2 Dock5	Core	0.588189623	3419.734468	0	14.70474057	0	0	0	0	0	18.23387831	0	0	49.99611795	4.705516983	0	0	0	0	0
F2S4_161004_026_A01	ALM	L1-L2/3	GABAergic	Lamp5	5	Lamp5 Plch2 Dock5	Core	0	15060.30267	0	0.910538251	0	0	0	0	0	7.284306008	0	0	240.8373674	0	0	0	0	0	0
F2S4_161004_026_D01	ALM	L1-L2/3	GABAergic	Lamp5	5	Lamp5 Plch2 Dock5	Intermediate	0	18025.68835	0	1.92299649	0	0	0	0	0	29.32569647	0	0	297.1029577	0	0	0	0	0	0
F2S4_161004_026_F01	ALM	L1-L2/3	GABAergic	Lamp5	5	Lamp5 Plch2 Dock5	Core	0	3194.472766	0	54.21679521	0	0	0	0	0	0	0	0	236.0589668	0	0	0	0	0	26.86850028
F2S4_161004_027_H01	ALM	L1-L2/3	GABAergic	Lamp5	5	Lamp5 Plch2 Dock5	Core	0	6099.963845	0	0.956481983	0	0	27.7379775	0	0	9.086578836	0	0	97.56116224	0	0	0	0	0	0
F2S4_161019_002_E01	ALM	L1	GABAergic	Lamp5	5	Lamp5 Plch2 Dock5	Core	1.132271376	3951.627102	0	0	1.132271376	0.566135688	0	0	0	0	0	0	408.7499667	0	0	30.00519146	0	0	0
F2S4_161019_002_F01	ALM	L1	GABAergic	Lamp5	5	Lamp5 Plch2 Dock5	Core	0.665304566	11711.35628	0	44.57540595	0	1.330609133	0	0	0	0	216.2239841	0	145.7017001	0	0	0	0	0	0
F2S4_161019_006_D01	ALM	L1	GABAergic	Lamp5	5	Lamp5 Plch2 Dock5	Core	0.923033753	4065.963684	0	0	0.923033753	0.923033753	0	0	0	30.46011387	0	0	102.4567466	0	0	37.84438389	0	0	0
F2S4_161019_006_G01	ALM	L1	GABAergic	Lamp5	5	Lamp5 Plch2 Dock5	Core	1.088228685	6885.767003	0	660.5548116	0.544114342	0	0	0	0	0.544114342	0	0	334.6303206	0	0	0	0	0	0
F2S4_161019_007_G01	ALM	L1	GABAergic	Lamp5	5	Lamp5 Plch2 Dock5	Core	1.915484972	3634.951982	0	70.87294397	0	0	1.276989981	0	0	0	0	0	171.1166575	0	0	0	0	0	0
F2S4_161019_008_A01	ALM	L1	GABAergic	Lamp5	5	Lamp5 Plch2 Dock5	Core	0	14623.13907	0	243.9448594	0	5.27041363	0	0	0	112.9374349	0	0	355.3764619	0	0	0	0	0	0
F2S4_161019_008_B01	ALM	L1	GABAergic	Lamp5	5	Lamp5 Plch2 Dock5	Core	0.818587838	5030.222263	0	47.47809459	1.637175675	0	0	0	0	6.548702702	0	0	36.8364527	0	0	0	0	0	0
F2S4_161019_008_C01	ALM	L1	GABAergic	Lamp5	5	Lamp5 Plch2 Dock5	Core	0	7849.428643	0	123.0368387	0	0	0	0	0	70.7662863	0	0	155.2033324	0	0	0	0	0	0
F2S4_161019_008_D01	ALM	L1	GABAergic	Lamp5	5	Lamp5 Plch2 Dock5	Core	0	19220.04115	0	25.7473962	0	0	0	0	0	30.42874096	0	0	30.42874096	0	0	0	0	0	0
F2S4_161019_008_F01	ALM	L1	GABAergic	Lamp5	5	Lamp5 Plch2 Dock5	Core	0.894686457	11636.29206	0	0.894686457	0	2.684059371	0	0	0	25.0512208	0	0	224.5663007	0	0	0	0	0	0
F2S4_161019_008_G01	ALM	L1	GABAergic	Lamp5	5	Lamp5 Plch2 Dock5	Core	0.756195129	4594.641601	0	0	0	0.756195129	1.512390257	0	0	0	0	0	77.88809824	0	0	0	0	0	0
F2S4_161019_008_H01	ALM	L1	GABAergic	Lamp5	5	Lamp5 Plch2 Dock5	Core	1.424912457	7985.209409	0	44.88474239	0	0	0	0	0	0	0	0	26.36088045	0	0	0	0	0	0
F2S4_161019_009_A01	ALM	L1	GABAergic	Lamp5	5	Lamp5 Plch2 Dock5	Core	0.623373774	10654.70454	0	21.1947083	0	0.623373774	0	0	0	31.79206246	0	0	264.31048	0	0	0	0	0	0
F2S4_161019_011_H01	ALM	L1	GABAergic	Lamp5	5	Lamp5 Plch2 Dock5	Core	2.323170701	3688.730438	0	0.46463414	0	0.92926828	0	0	0	4.646341401	0	0	154.2585345	0	0	0	0	0	0
F2S4_161019_012_A01	ALM	L1	GABAergic	Lamp5	5	Lamp5 Plch2 Dock5	Core	2.578068518	4591.540031	0	86.91773862	0.368295503	0	0	0	0	19.51966164	0	0	103.8593317	0	0	0	0	0	0
F2S4_161019_012_D01	ALM	L1	GABAergic	Lamp5	5	Lamp5 Plch2 Dock5	Core	2.418756977	12738.38362	0	0	0	0	0	0	0	0.604689244	66.51581686	0	1321.245998	35.07197616	0	0	0	0	0
F2S4_161019_012_F01	ALM	L1	GABAergic	Lamp5	5	Lamp5 Plch2 Dock5	Intermediate	0.477137253	9636.263958	0	414.6322727	0	0	0	0	0	16.69980385	0	0	162.226666	0	0	16.2226666	0	0	0
F2S4_161019_012_G01	ALM	L1	GABAergic	Lamp5	5	Lamp5 Plch2 Dock5	Core	3.371581517	4911.430962	0	0	0.481654502	0	0	0	0	33.23416067	0	0	771.610513	5.77985403	0	0	0	0	0
F2S4_161019_013_D01	ALM	L1	GABAergic	Lamp5	5	Lamp5 Plch2 Dock5	Core	2.594057947	2113.119604	0	0	0	0	0.518811589	0	0	0	0	0	423.350257	0	0	0	0	0	0
F2S4_161019_013_G01	ALM	L1	GABAergic	Lamp5	5	Lamp5 Plch2 Dock5	Core	3.953138368	4419.043962	0	66.07388416	0	0.564734053	0	0	0	37.27244747	0.564734053	0	218.5520784	14.11835132	0	0	0	0	0
F2S4_161019_013_H01	ALM	L1	GABAergic	Lamp5	5	Lamp5 Plch2 Dock5	Core	2.411965665	6306.807821	0	226.7247725	0.482393133	0	0.482393133	0	0	52.5808515	0.482393133	0	93.58426781	0	0	0	0	0	0
F2S4_161020_001_G01	ALM	L1	GABAergic	Lamp5	5	Lamp5 Plch2 Dock5	Core	3.132498418	3731.327699	0	0	0	0.52208307	0	0	0	4.698747627	0.52208307	0	159.2353363	0	0	0	0	0	0
F2S4_161020_002_C01	ALM	L1	GABAergic	Lamp5	5	Lamp5 Plch2 Dock5	Core	1.796769767	4344.589297	0	173.6877442	0	0	46.71601395	0	0	0	0	0	35.33647209	0	0	0	0	0	0
F2S4_161020_002_E01	ALM	L1	GABAergic	Lamp5	5	Lamp5 Plch2 Dock5	Core	12.69863845	10915.74961	0	35.55618767	0	0	5.079455381	0	0	33.01645998	0	0	302.2275952	0	0	0	0	0	0
F2S4_161020_005_B01	ALM	L1	GABAergic	Lamp5	5	Lamp5 Plch2 Dock5	Core	0.579890667	3736.815461	0	121.1971495	0	0	0	0.579890667	0	0	0	0	250.5127683	0	0	0	0	0	0
F2S4_161020_005_D01	ALM	L1	GABAergic	Lamp5	5	Lamp5 Plch2 Dock5	Core	0	1302.385929	0	0	0	0	0	0	0	0.70209484	0	0	495.6789573	28.08379362	0	0	0	0	0
F2S4_161020_006_C01	ALM	L1	GABAergic	Lamp5	5	Lamp5 Plch2 Dock5	Core	1.394317043	5176.402021	0	119.9112657	0	0	0	0	0	0	0	0	494.2853916	0	0	0	0	0	0
F2S4_161020_006_H01	ALM	L1	GABAergic	Lamp5	5	Lamp5 Plch2 Dock5	Core	0	3468.247945	0	0	0	0	0	0.584273576	0	8.179830058	26.2923109	0	123.2817244	0	0	0	0	0	0
F2S4_161020_007_A01	ALM	L1	GABAergic	Lamp5	5	Lamp5 Plch2 Dock5	Core	1.702028435	4218.051969	0	0.425507109	0	0	0	0	0	0	0	0	204.6689193	0	0	0	0	0	0
F2S4_161020_007_B01	ALM	L1	GABAergic	Lamp5	5	Lamp5 Plch2 Dock5	Core	1.152571676	4123.901455	0	0	0.576285838	0	26.50914854	0	0	0	0	0	212.6494741	0	0	0	0	0	0
F2S4_161020_007_C01	ALM	L1	GABAergic	Lamp5	5	Lamp5 Plch2 Dock5	Core	1.670758168	21602.90311	0	4.455355114	0.556919389	0	1.670758168	0	0	82.42406961	0	0	251.7275639	0	0	0	0	0	0
F2S4_161020_007_F01	ALM	L1	GABAergic	Lamp5	5	Lamp5 Plch2 Dock5	Core	4.384964833	4343.307667	0	0	0	0	0	0	0	0	0	0	0	0	0	0	0	0	0
F2S4_161020_008_G01	ALM	L1	GABAergic	Lamp5	5	Lamp5 Plch2 Dock5	Core	1.11953687	9776.915486	0	0	0	0.559768435	0	0	0	49.25962228	0	0	333.0622188	0	0	0	0	0	0
F2S4_170209_001_G01	ALM	L1-L6	GABAergic	Lamp5	5	Lamp5 Plch2 Dock5	Core	0.495682359	2043.698365	0	52.04664768	0	0.495682359	0	1.487047076	0	14.87047076	0	0.495682359	238.4232146	0	0	0	0	0	0
F2S4_171121_001_F01	ALM	L2/3	GABAergic	Lamp5	5	Lamp5 Plch2 Dock5	Intermediate	0	39247.63879	0	218.3970997	0	0	0	0	0	50.3993307	0	0	71.6790481	0	0	0	0	0	0
F1S4_160108_001_E01	VISp	L2/3	GABAergic	Lamp5	5	Lamp5 Plch2 Dock5	Core	24.46708693	4274.912189	0	111.5243962	0	0	0.569002022	0	0	63.1592244	0	0	740.2716302	6.259022238	0	0	0	0	0
F1S4_160108_002_B01	VISp	L2/3	GABAergic	Lamp5	5	Lamp5 Plch2 Dock5	Core	1.182369919	4418.516386	0	94.58959349	0	0	0	0	0	73.30693495	76.26285975	0	337.5666118	0	0	0	0	0	0
F1S4_160108_003_A01	VISp	L2/3	GABAergic	Lamp5	5	Lamp5 Plch2 Dock5	Core	0.591440554	37135.96095	6.505846094	0	0	0	0.591440554	0	0	195.7668234	94.63048864	0	350.7242485	0	0	0	0	0	0
F1S4_160108_003_D01	VISp	L2/3	GABAergic	Lamp5	5	Lamp5 Plch2 Dock5	Core	1.07880684	6549.975727	0	81.98931981	0	0	1.07880684	0	0	5.933437618	37.75823939	0	518.3666864	37.21883597	0	65.2678138	0	0	0
F1S4_160108_005_A01	VISp	L1	GABAergic	Lamp5	5	Lamp5 Plch2 Dock5	Core	0	5394.176817	0	60.66553121	0	0.505546093	0	0	0	32.35494998	0	0.505546093	513.1292848	0	0	0	0	0	0
F1S4_160108_005_B01	VISp	L1	GABAergic	Lamp5	5	Lamp5 Plch2 Dock5	Core	0	1390.222336	0	0.998005984	0	0	0	0	0	0	0	0	527.9451656	0	0	0	0	0	0
F1S4_160108_005_E01	VISp	L1	GABAergic	Lamp5	5	Lamp5 Plch2 Dock5	Core	3.766941821	2513.805842	0.627823637	0	1.88347091	0	0	0	0	26.36859275	0	0	447.638253	43.31983094	0	0	0	0	0
F1S4_160108_005_F01	VISp	L1	GABAergic	Lamp5	5	Lamp5 Plch2 Dock5	Core	6.047984711	4341.109026	0	0	1.343996602	0	0.671998301	0	0	0	0	0	490.5587599	0	0	0	0	0	0
F1S4_160108_006_F01	VISp	L1	GABAergic	Lamp5	5	Lamp5 Plch2 Dock5	Core	1.713791163	2862.031242	1.142527442	77.69186606	0	0	1.142527442	0	0.571263721	0	0.571263721	0	502.1408108	0	0	0	0	0	0
F1S4_170426_011_H01	VISp	L2/3	GABAergic	Lamp5	5	Lamp5 Plch2 Dock5	Core	6.612999631	3451.985807	1.526076838	708.6083451	0	0.508692279	0	0.508692279	0	21.36507573	0	0	647.5652716	0	0	0	0	0	0
F1S4_180124_301_F01	VISp	L1-L4	GABAergic	Lamp5	5	Lamp5 Plch2 Dock5	Core	0	599.4054363	0	213.0358578	0	0	0	0	0	0	0	0	434.7868189	0	0	206.2574442	0	0	0
F1S4_180124_303_B01	VISp	L1-L4	GABAergic	Lamp5	5	Lamp5 Plch2 Dock5	Core	0	3859.337124	0	0	0	0	0	0	0	0	0	0	425.2281104	6.456825972	0	69.18027827	0	0	28.59451502
F1S4_180130_310_C01	VISp	L1-L4	GABAergic	Lamp5	5	Lamp5 Plch2 Dock5	Core	0	2090.182763	0	1492.790594	0	0	38.63044051	0	0	34.49146474	0	0	717.4224666	2.759317179	0	0	0	0	0
F1S4_180130_310_D01	VISp	L1-L4	GABAergic	Lamp5	5	Lamp5 Plch2 Dock5	Core	0	2436.439176	0	0	0	0	0	0	0	12.59955618	0	0	576.4296953	0	0	0	0	0	0
F1S4_180130_310_E01	VISp	L1-L4	GABAergic	Lamp5	5	Lamp5 Plch2 Dock5	Core	0	10359.09074	0	275.4974849	0	0	0	0	0	227.3335889	0	0	296.6895991	0	0	0	0	0	0
F1S4_180130_311_E01	VISp	L1-L4	GABAergic	Lamp5	5	Lamp5 Plch2 Dock5	Core	0	1361.186113	0	0	0	0	0	0	0	0	0	0	199.2368432	0	0	0	0	0	0
F1S4_180130_330_D01	VISp	L1-L4	GABAergic	Lamp5	5	Lamp5 Plch2 Dock5	Core	0	6288.579027	0	0	0	0	0	0	0	45.67124433	0	0	606.0222805	0	0	82.55955706	0	0	35.13172641
F1S4_180130_330_H01	VISp	L1-L4	GABAergic	Lamp5	5	Lamp5 Plch2 Dock5	Core	0	2770.950758	0	411.0022655	0	0	0	0	0	384.4859903	26.51627519	0	813.718195	19.88720639	0	0	0	0	0
F1S4_180130_331_H01	VISp	L1-L4	GABAergic	Lamp5	5	Lamp5 Plch2 Dock5	Intermediate	0	4597.269286	0	24.81178489	0	0	0	0	0	187.860657	0	0	393.4440175	0	0	0	0	0	0
F1S4_180130_332_A01	VISp	L1-L4	GABAergic	Lamp5	5	Lamp5 Plch2 Dock5	Core	0	1155.880835	0	0	0	0	0	0	0	98.56348205	51.96983599	0	17.9206331	0	0	0	0	0	0
F1S4_180130_332_D01	VISp	L1-L4	GABAergic	Lamp5	5	Lamp5 Plch2 Dock5	Core	0	2658.252434	0	0	0	0	0	0	0	55.96320913	0	0	97.1126276	0	0	0	0	0	0
F1S4_180130_332_G01	VISp	L1-L4	GABAergic	Lamp5	5	Lamp5 Plch2 Dock5	Core	0	2121.212583	0	0	0	0	0	0	0	96.07217308	0	0	606.932141	0	0	154.0204679	0	0	0
F2S4_151223_003_D01	VISp	L2/3	GABAergic	Lamp5	5	Lamp5 Plch2 Dock5	Core	1.115161626	8320.778472	0	0	0	0.557580813	0	0	0	0	0	0	499.0348276	0	0	0	0	0	0
F2S4_151223_003_E01	VISp	L2/3	GABAergic	Lamp5	5	Lamp5 Plch2 Dock5	Core	9.946779755	4122.442869	0	0	2.486694939	0	0	0	0	9.449440767	0	0	288.9539519	0	0	0	0	0	0
F2S4_151223_014_F01	VISp	L1	GABAergic	Lamp5	5	Lamp5 Plch2 Dock5	Core	2.588791224	10892.77054	0	97.51113612	0	0	0	0	0	67.30857183	0	0	309.7920165	0	0	0	0	0	0
F2S4_151223_015_C01	VISp	L1	GABAergic	Lamp5	5	Lamp5 Plch2 Dock5	Core	0	10664.17511	0	0	0	0	0	0	0	27.39086073	0	0	515.8612105	0	0	0	0	0	0
F2S4_151223_016_B01	VISp	L1	GABAergic	Lamp5	5	Lamp5 Plch2 Dock5	Core	2.491568118	3507.297388	0.830522706	0.830522706	0	0	0	0	0	0	0	0	455.9569656	0	0	0	0	0	0
F2S4_151223_017_F01	VISp	L1	GABAergic	Lamp5	5	Lamp5 Plch2 Dock5	Core	0.718457386	3542.713369	0	47.41818746	0	0	0	0	0	0	0	0	135.7884459	0	0	0	0	0	0
F2S4_151223_017_G01	VISp	L1	GABAergic	Lamp5	5	Lamp5 Plch2 Dock5	Core	0.841130614	2441.802173	0	0.841130614	0	0.841130614	0.841130614	0	0.841130614	0	0	0	196.8245637	0	0	44.57992255	0	0	0
F2S4_151223_018_G01	VISp	L1	GABAergic	Lamp5	5	Lamp5 Plch2 Dock5	Core	0	25479.77455	0.836609356	0	0	0	0	0	0	194.0933706	0	0	431.6904278	0	0	0	0	0	0
F2S4_160114_010_G01	VISp	L1	GABAergic	Lamp5	5	Lamp5 Plch2 Dock5	Core	1.89099069	2538.970166	1.26066046	0	0	0.63033023	0	0	0.63033023	0	0	0	80.68226944	0	0	0	0	0	0
F2S4_160114_011_B01	VISp	L1	GABAergic	Lamp5	5	Lamp5 Plch2 Dock5	Core	2.408827389	39077.20232	0	54.8008231	2207.088095	0	0	0	0	230.0430156	72.26482167	0	175.2421925	0	0	0	0	0	0
F2S4_160114_011_C01	VISp	L1	GABAergic	Lamp5	5	Lamp5 Plch2 Dock5	Core	2.837781082	2729.945401	0	0	0	0	0	0.709445271	0	0	0	0	196.5163399	0	0	0	0	0	0
F2S4_160114_012_E01	VISp	L1	GABAergic	Lamp5	5	Lamp5 Plch2 Dock5	Core	0	2618.031704	0	0	0	0	0	0	0	311.878152	0	0	568.7959584	15.70295591	0	0	0	0	0
F2S4_160114_013_D01	VISp	L1	GABAergic	Lamp5	5	Lamp5 Plch2 Dock5	Core	2.191623505	697.4841806	0	0	0.547905876	0	0.547905876	0	0	0	0	0	151.2220219	0	0	0	0	0	0
F2S4_160114_021_D01	VISp	L2/3	GABAergic	Lamp5	5	Lamp5 Plch2 Dock5	Core	23.54835599	19310.21259	0	0	3.924725998	1.682025428	0.560675143	0	0	47.65738712	14.57755371	0	185.5834722	0	0	0	0	0	0
F2S4_160115_024_A01	VISp	L1	GABAergic	Lamp5	5	Lamp5 Plch2 Dock5	Core	0	12932.27361	0	190.2426651	0	0	0	0	0	177.5598207	63.4142217	0	249.429272	0	0	0	0	0	0
F2S4_160115_024_F01	VISp	L1	GABAergic	Lamp5	5	Lamp5 Plch2 Dock5	Core	0.870384135	5185.748678	0	0.870384135	0	0	0	0	0	23.50037165	0	0	260.2448565	2.611152406	0	56.5749688	0	0	0
F2S4_160115_026_B01	VISp	L1	GABAergic	Lamp5	5	Lamp5 Plch2 Dock5	Intermediate	0	1426.010735	0	0	0	0	0	0	0	14.12714598	0	0	162.0466744	0	0	0	0	0	22.43723184
F2S4_160115_027_A01	VISp	L1	GABAergic	Lamp5	5	Lamp5 Plch2 Dock5	Core	0	6236.647904	0	267.6088919	0	0	0	0	0	22.67871965	0	0	312.9663312	0	0	0	0	0	54.42892716
F2S4_160115_028_F01	VISp	L1	GABAergic	Lamp5	5	Lamp5 Plch2 Dock5	Core	1.738450172	2844.683964	0	0.579483391	0.579483391	0	0	0	0	8.692250858	0.579483391	0	95.03527605	7.533284077	0	0	0	0	0
F2S4_160115_029_C01	VISp	L1	GABAergic	Lamp5	5	Lamp5 Plch2 Dock5	Core	1.640118613	3343.381793	0.820059307	175.4926916	0	0.820059307	0	0	0	12.3008896	0	0	212.3953604	0	0	0	0	0	0
F2S4_160119_004_H01	VISp	L2/3	GABAergic	Lamp5	5	Lamp5 Plch2 Dock5	Core	4.331056023	9378.592456	0	0	0	1.237444578	1.856166867	0	0	2.474889156	48.26033854	0	181.2856307	11.75572349	0	0	0	0	0
F2S4_160119_006_D01	VISp	L1	GABAergic	Lamp5	5	Lamp5 Plch2 Dock5	Core	0	5326.689395	0	188.5939906	0	0	0	0	0	0	7.272261848	0	847.9457315	0	0	0	0	0	0
F2S4_160119_006_G01	VISp	L1	GABAergic	Lamp5	5	Lamp5 Plch2 Dock5	Intermediate	0	2155.355642	0	0	0	0	0	0	0	0	0	0	167.1045588	0	0	0	0	0	0
F2S4_160119_007_D01	VISp	L1	GABAergic	Lamp5	5	Lamp5 Plch2 Dock5	Core	1.373723553	3957.697557	1.373723553	1.373723553	0	0	0	0	0	8.242341319	72.80734832	0	208.8059801	0	0	0	0	0	0
F2S4_160119_007_E01	VISp	L1	GABAergic	Lamp5	5	Lamp5 Plch2 Dock5	Core	9.872253046	4369.459198	0	0	0	0	130.3137402	0	0	0	0	0	108.5947835	0	0	0	0	0	0
F2S4_160119_007_H01	VISp	L1	GABAergic	Lamp5	5	Lamp5 Plch2 Dock5	Core	0.948050618	4474.798918	1.896101237	0	0	0	0	0	0	24.64931608	91.96090998	0	309.0645016	0	0	0	0	0	0
F2S4_160121_004_A01	VISp	L2/3	GABAergic	Lamp5	5	Lamp5 Plch2 Dock5	Core	0.658033703	5049.092604	0	307.9597731	0	0	0	0	0	9.870505548	0	0	144.7674147	0	0	0	0	0	0
F2S4_160121_006_G01	VISp	L2/3	GABAergic	Lamp5	5	Lamp5 Plch2 Dock5	Intermediate	0	22462.02117	0	310.4918222	0	0	0	0	0	287.1465724	0	0	156.4131736	0	0	0	0	0	0
F2S4_160121_007_A01	VISp	L1	GABAergic	Lamp5	5	Lamp5 Plch2 Dock5	Core	0	3838.780752	0	0	0	0	0	0	0.596454436	7.157453235	0	0	59.04898919	0	0	0	0	0	0
F2S4_160121_007_D01	VISp	L1	GABAergic	Lamp5	5	Lamp5 Plch2 Dock5	Core	0	6672.866683	0	0.440133677	0	0	0	0	0	10.56320826	0	0	1412.829104	0	0	0	0	0	0
F2S4_160121_007_E01	VISp	L1	GABAergic	Lamp5	5	Lamp5 Plch2 Dock5	Core	0	1075.379665	0	26.69908133	1.483282296	0	0	0	0	0	0	0	110.5045311	0	0	0	0	0	0
F2S4_160121_008_F01	VISp	L4	GABAergic	Lamp5	5	Lamp5 Plch2 Dock5	Core	0	4449.484536	0.687285223	0	0	0	0	0	0	9.621993127	0	0	292.7835052	10.99656357	0	0	0	0	0
F2S4_160128_005_E01	VISp	L2/3	GABAergic	Lamp5	5	Lamp5 Plch2 Dock5	Core	3.625517219	27244.72604	0.517931031	0	0	0.517931031	1.035862063	0	0	40.39862044	0.517931031	0	161.5944818	0	0	0	0	0	0
F2S4_160129_027_B01	VISp	L2/3	GABAergic	Lamp5	5	Lamp5 Plch2 Dock5	Core	2.986474258	24692.91578	0	55.24977377	0.746618565	87.35437205	0	0	0	73.16861932	61.96934086	0	373.3092823	0	0	0	0	0	0
F2S4_160129_029_D01	VISp	L2/3	GABAergic	Lamp5	5	Lamp5 Plch2 Dock5	Core	0	24300.34514	1.374803833	0	0	0	0	0.687401916	0	0	0	0	22.68426324	0	0	0	0	0	0
F2S4_160303_016_B01	VISp	L1	GABAergic	Lamp5	5	Lamp5 Plch2 Dock5	Core	0.58624104	3037.901069	0	867.6367393	0	0.58624104	0	0	0	76.21133521	0	0	570.412532	0	0	0	0	0	0
F2S4_160303_018_C01	VISp	L1	GABAergic	Lamp5	5	Lamp5 Plch2 Dock5	Core	1.518507186	1080.417863	0.759253593	290.0348725	0	0	0.759253593	0	0	30.37014372	0	0	180.7023551	0	0	9.111043116	0	0	0
F2S4_160303_019_F01	VISp	L1	GABAergic	Lamp5	5	Lamp5 Plch2 Dock5	Core	1.702978907	2916.635209	0	145.3208668	1.135319272	1.135319272	0	0	0	0	0	0	261.1234325	0	0	0	0	0	0
F2S4_160304_001_A01	VISp	L1	GABAergic	Lamp5	5	Lamp5 Plch2 Dock5	Core	3.26366674	9055.043371	1.087888913	0.543944457	0	1.63183337	0	0	0	116.4041137	0	0	255.1099502	11.96677805	0	0	0	0	0
F2S4_160304_001_F01	VISp	L1	GABAergic	Lamp5	5	Lamp5 Plch2 Dock5	Core	6.816431235	1226.957622	2.272143745	437.3876709	5.680359362	0	1.136071872	0	0	0	0	0	241.9833088	0	0	0	0	0	0
F2S4_160304_002_F01	VISp	L1	GABAergic	Lamp5	5	Lamp5 Plch2 Dock5	Core	8.333734587	2747.354502	0	0.92597051	0	0	0	0	0	15.74149866	0	0	1100.978936	0	0	0	0	0	0
F2S4_160304_002_G01	VISp	L1	GABAergic	Lamp5	5	Lamp5 Plch2 Dock5	Intermediate	1.370613096	11.65021131	0.685306548	1579.631593	0.685306548	0	2.741226192	0	0	47.97145835	0	0	572.2309675	0	0	0	0	0	0
F2S4_160304_003_E01	VISp	L1	GABAergic	Lamp5	5	Lamp5 Plch2 Dock5	Core	19.60484795	17382.14832	0	0.816868665	0	0.816868665	0	0	0	342.2679705	0	0	338.1836272	82.50373513	0	0	0	0	0
F2S4_160304_003_H01	VISp	L1	GABAergic	Lamp5	5	Lamp5 Plch2 Dock5	Core	0.814715721	1221.258866	0	0	0.814715721	0	0.814715721	0	0	0	0.814715721	0	197.1612045	0	0	0	0	0	0
F2S4_160304_004_B01	VISp	L1	GABAergic	Lamp5	5	Lamp5 Plch2 Dock5	Intermediate	0.672065594	11717.46362	0	0	0.672065594	0	0.672065594	0	0	102.8260358	0	0	46.37252596	0	0	0	0	0	0
F2S4_160304_004_D01	VISp	L1	GABAergic	Lamp5	5	Lamp5 Plch2 Dock5	Core	0.625218827	3276.146651	0	0	0	0	0	0	0	35.63747312	23.13309658	0	168.8090832	20.63222128	0	63.77232031	0	0	0
F2S4_160304_004_E01	VISp	L1	GABAergic	Lamp5	5	Lamp5 Plch2 Dock5	Intermediate	11.33454437	3234.878962	0	0	1.511272582	1.511272582	0	0.755636291	0	0	0	0	615.8435772	0	0	0	0	0	49.11635892
F2S4_160304_014_D01	VISp	L4	GABAergic	Lamp5	5	Lamp5 Plch2 Dock5	Core	0.491150692	18653.9033	0	8.349561771	0.491150692	0.491150692	0.491150692	0	0	74.65490524	19.154877	0	64.3407407	0	0	0	0	0	0
F2S4_160304_018_C01	VISp	L2/3	GABAergic	Lamp5	5	Lamp5 Plch2 Dock5	Core	2.586505683	24974.00562	0	1319.117898	0.646626421	0	0	0	0	93.76083099	0	0	272.8763495	0	0	0	0	0	0
F2S4_160304_019_H01	VISp	L2/3	GABAergic	Lamp5	5	Lamp5 Plch2 Dock5	Core	3.169135159	3741.692244	0	0	1.056378386	0	0.528189193	0	0	16.37386499	0	0	172.189677	10.03559467	0	0	0	0	0
F2S4_160304_020_E01	VISp	L2/3	GABAergic	Lamp5	5	Lamp5 Plch2 Dock5	Core	17.81189401	3601.10031	0	0	0	0	0.774430174	0	0	0	0	0	164.1791969	0	0	0	0	0	0
F2S4_160304_020_F01	VISp	L2/3	GABAergic	Lamp5	5	Lamp5 Plch2 Dock5	Core	1.507097677	6205.474683	0.753548838	0	0.753548838	0	0	0	0	0	0	0	59.53035822	0	0	0.753548838	0	0	0
F2S4_160321_002_H01	VISp	L2/3	GABAergic	Lamp5	5	Lamp5 Plch2 Dock5	Core	0	2796.420582	0.611239471	1.833718414	0	0	0	0	0	0	0	0	60.51270767	0	0	6.723634185	0	0	0
F2S4_160321_003_H01	VISp	L2/3	GABAergic	Lamp5	5	Lamp5 Plch2 Dock5	Core	0.523018023	3048.672057	0	0.523018023	0	0	0	0	0	20.92072093	0	0	461.3018965	0	0	0	0	0	0
F2S4_160330_001_A01	VISp	L2/3	GABAergic	Lamp5	5	Lamp5 Plch2 Dock5	Core	1.761995519	7294.074115	0	481.0247766	0	1.174663679	0	0	0	171.5008971	13.50863231	0	412.3069514	0	0	0	0	0	0
F2S4_160330_002_D01	VISp	L2/3	GABAergic	Lamp5	5	Lamp5 Plch2 Dock5	Core	3.630671498	5803.369056	6.224008282	0	0.518667357	1.037334714	0	0	0	18.15335749	0	0	294.6030587	0	0	11.41068185	0	0	0
F2S4_160330_019_C01	VISp	L2/3	GABAergic	Lamp5	5	Lamp5 Plch2 Dock5	Core	0	574.3820923	0	0	0	0	0	0	0	13.21311985	0	0	479.5585263	0	0	77.72423442	0	0	0
F2S4_160404_001_B01	VISp	L1	GABAergic	Lamp5	5	Lamp5 Plch2 Dock5	Intermediate	6.869746956	22679.67691	0	196.0520093	0.528442074	1.585326221	0.528442074	0	0	198.1657776	0	0	246.2540063	0	0	0	0	0	0
F2S4_160404_001_E01	VISp	L1	GABAergic	Lamp5	5	Lamp5 Plch2 Dock5	Core	278.7966066	4982.417049	0	1.072294641	58.44005793	1.072294641	20.9097455	0	0	54.15087936	80.95824538	0	353.8572315	0	0	0	0	0	0
F2S4_160404_001_F01	VISp	L1	GABAergic	Lamp5	5	Lamp5 Plch2 Dock5	Core	10.57969153	2515.447609	0.503794835	106.3007101	1.007589669	1.511384504	0.503794835	0	0	89.17168572	0	0	495.2303224	0	0	0	0	0	0
F2S4_160404_002_E01	VISp	L1	GABAergic	Lamp5	5	Lamp5 Plch2 Dock5	Core	0.586778358	1677.599325	0	45.76871192	0	0	0	0	0	17.60335074	115.5953365	0	72.17373803	0	0	38.14059327	0	0	0
F2S4_160404_002_H01	VISp	L1	GABAergic	Lamp5	5	Lamp5 Plch2 Dock5	Core	1.951216974	60.48772619	0.650405658	39.02433948	0	0	0	0	0.650405658	0	0	0	193.1704804	0	0	3.25202829	0	0	0
F2S4_160404_003_B01	VISp	L1	GABAergic	Lamp5	5	Lamp5 Plch2 Dock5	Core	5.219882818	5331.398497	0.474534802	682.3810448	0	0.474534802	0.474534802	0	0	50.30068898	116.7355612	0	399.558303	39.86092334	0	0	0	0	0
F2S4_160404_003_D01	VISp	L1	GABAergic	Lamp5	5	Lamp5 Plch2 Dock5	Core	0.445024163	1752.950176	0	0	0.445024163	0	0	0	0.890048325	16.91091818	0	0	459.2649358	0	0	0	0	0	0
F2S4_160404_003_E01	VISp	L1	GABAergic	Lamp5	5	Lamp5 Plch2 Dock5	Core	10.00734348	552.3100523	0	202.5295705	2.38270083	3.335781161	1.429620498	0	0	0	0	0	686.6943791	0	0	119.6115816	0	0	45.74785593
F2S4_160404_003_H01	VISp	L1	GABAergic	Lamp5	5	Lamp5 Plch2 Dock5	Core	1.441311247	1811.728238	0.480437082	58.61332406	0	0	0	0	0	55.25026448	0	0	316.1276002	0	0	0	0	0	0
F2S4_160404_004_A01	VISp	L1	GABAergic	Lamp5	5	Lamp5 Plch2 Dock5	Core	0.951997887	1787.852031	0.475998943	0	0	0.475998943	37.60391652	0	0	0	0.475998943	0	254.1834357	0	0	0	0	0	0
F2S4_160404_004_B01	VISp	L1	GABAergic	Lamp5	5	Lamp5 Plch2 Dock5	Core	2.789125757	3887.244411	0.796893073	210.3797713	0.796893073	0.796893073	0	0	0	35.06329522	0	0	226.7160793	0	0	0.398446537	0	0	0
F2S4_160404_005_A01	VISp	L1	GABAergic	Lamp5	5	Lamp5 Plch2 Dock5	Core	0.808920778	1358.986908	0.404460389	0	0	0.808920778	0	0	0	0.404460389	0	0	72.39840966	0	0	0	0	0	0
F2S4_160404_005_C01	VISp	L1	GABAergic	Lamp5	5	Lamp5 Plch2 Dock5	Core	2.985341971	6669.75152	0	261.2174225	0	0	34.82898966	0	0	86.07736016	23.38517877	0	573.6832154	0	0	0	0	0	0
F2S4_160404_005_G01	VISp	L1	GABAergic	Lamp5	5	Lamp5 Plch2 Dock5	Intermediate	4.265509178	822.3901695	0.853101836	0	0	0	0	0	0	15.78238396	0	0.853101836	428.6836724	0	0	374.5117058	0	0	0
F2S4_160404_006_D01	VISp	L1	GABAergic	Lamp5	5	Lamp5 Plch2 Dock5	Core	2.771476518	2055.973664	0.923825506	1.385738259	0.923825506	0.461912753	0	0	0.461912753	0	0	0	490.0894309	0	0	65.59161093	0	0	0
F2S4_160404_006_G01	VISp	L1	GABAergic	Lamp5	5	Lamp5 Plch2 Dock5	Core	6.066171667	4760.078244	0.46662859	177.3188641	0	0	0.46662859	0	0	75.12720295	0	0	178.2521213	6.999428847	0	0	0	0	0
F2S4_160404_018_F01	VISp	L2/3	GABAergic	Lamp5	5	Lamp5 Plch2 Dock5	Core	3.141788935	5381.884445	0	222.5433829	1.047262978	1.570894467	0	0	0	89.54098464	78.54472337	0	195.3145454	0	0	0	0	0	0
F2S4_160404_020_D01	VISp	L2/3	GABAergic	Lamp5	5	Lamp5 Plch2 Dock5	Core	5.446952133	5391.492257	0	0	0.495177467	0	0.495177467	0	0	52.98398893	94.08371866	0	215.402198	0	0	0	0	0	0
F2S4_160404_030_F01	VISp	L1	GABAergic	Lamp5	5	Lamp5 Plch2 Dock5	Core	7.42824974	1560.993624	1.061178534	0	1.061178534	1.591767801	1.061178534	0.530589267	0	7.958839007	0	0	146.973227	0	0	0	0	0	0
F2S4_160404_031_E01	VISp	L1	GABAergic	Lamp5	5	Lamp5 Plch2 Dock5	Core	5.485700911	2413.098879	0	14.01901344	0	0	0	0	0	43.27608496	0	0	168.2281613	12.79996879	0	0	0	0	0
F2S4_160404_032_D01	VISp	L1	GABAergic	Lamp5	5	Lamp5 Plch2 Dock5	Intermediate	5.870828849	3469.072767	0	7.044994619	0.587082885	0	1.761248655	0.587082885	0	28.17997848	0.587082885	0	205.4790097	0	0	0	0	0	0
F2S4_160404_032_E01	VISp	L1	GABAergic	Lamp5	5	Lamp5 Plch2 Dock5	Core	0.63038427	2652.657007	0	40.97497753	0	0	0	0	0	39.08382472	17.02037528	0	107.7957101	0	0	0	0	0	0
F2S4_160404_033_H01	VISp	L1	GABAergic	Lamp5	5	Lamp5 Plch2 Dock5	Core	2.73752101	9221.339524	0.912507003	54.29416671	0.456253502	0.912507003	0	0	0	65.24425075	230.8642719	0	43.34408267	0	0	0	0	0	0
F2S4_160404_034_C01	VISp	L1	GABAergic	Lamp5	5	Lamp5 Plch2 Dock5	Core	6.345721239	895.2755048	0.528810103	62.92840228	0	0	1.057620206	0	0	0	0	0	260.1745708	0	0	38.07432743	0	0	0
F2S4_160404_035_A01	VISp	L1	GABAergic	Lamp5	5	Lamp5 Plch2 Dock5	Core	3.343967149	8281.095789	2.388547963	0.477709593	0	0	0.477709593	0	0	175.7971301	63.53537583	0	396.0212523	0	0	0	0	0	0
F2S4_160404_035_D01	VISp	L1	GABAergic	Lamp5	5	Lamp5 Plch2 Dock5	Core	5.817587602	2710.349424	0	0	0	1.292797245	0.646398622	0	0	0	0	0	431.1478811	0	0	0	0	0	0
F2S4_160404_035_F01	VISp	L1	GABAergic	Lamp5	5	Lamp5 Plch2 Dock5	Core	4.004214722	2176.576717	0.572030675	0	0	0.572030675	0.572030675	0	0	13.72873619	0	0	74.93601837	1.716092024	0	55.48697543	0	0	0
F2S4_160404_035_G01	VISp	L1	GABAergic	Lamp5	5	Lamp5 Plch2 Dock5	Core	5.975286216	905.7538023	0.995881036	0.497940518	0	0	0.497940518	0	0	0	0.497940518	0	65.72814838	0	0	0	0	0	0
F2S4_160404_035_H01	VISp	L1	GABAergic	Lamp5	5	Lamp5 Plch2 Dock5	Core	3.230699398	808.2132994	0.5384499	0	0.5384499	1.615349699	0	0	0	0	0	0	259.5328516	0	0	70.53693686	0	0	0
F2S4_160404_036_B01	VISp	L1	GABAergic	Lamp5	5	Lamp5 Plch2 Dock5	Core	2.146279692	2157.011091	0	196.9211618	0	0	0	0	0	65.46153062	0	0	125.557362	1.073139846	0	0	0	0	0
F2S4_160404_037_C01	VISp	L1	GABAergic	Lamp5	5	Lamp5 Plch2 Dock5	Core	14.50361382	678.0439459	0	0.604317242	0	1.208634485	1058.159491	0	0	24.77700694	0	0	378.3025937	0.604317242	0	0	0	0	0
F2S4_160404_037_E01	VISp	L1	GABAergic	Lamp5	5	Lamp5 Plch2 Dock5	Core	8.210005369	833.0418781	2.189334765	0	0.547333691	0.547333691	0.547333691	0	0	0.547333691	0.547333691	0	221.670145	0	0	0	0	0	0
F2S4_160404_037_G01	VISp	L1	GABAergic	Lamp5	5	Lamp5 Plch2 Dock5	Core	5.495954977	3613.590397	0.549595498	113.766268	0	1.099190995	0	0	0	48.9139993	54.40995427	0	228.0821316	0	0	0	0	0	0
F2S4_160404_042_G01	VISp	L5	GABAergic	Lamp5	5	Lamp5 Plch2 Dock5	Intermediate	0	4028.200584	0.454291258	0.454291258	0	0	0	0	0	0	30.89180554	0	0	0	0	0	0	0	0
F2S4_160404_049_H01	VISp	L1	GABAergic	Lamp5	5	Lamp5 Plch2 Dock5	Core	0.84812103	2792.438492	0.424060515	0	0.84812103	0.424060515	0	0	0	30.10829657	0.424060515	0	588.1719345	0	0	0	0	0	0
F2S4_160404_050_A01	VISp	L1	GABAergic	Lamp5	5	Lamp5 Plch2 Dock5	Core	0	2212.178901	0.490396564	0	0	0.490396564	0	0	0	22.06784538	0	0	705.6806557	0	0	21.08705226	0	0	0
F2S4_160404_050_C01	VISp	L1	GABAergic	Lamp5	5	Lamp5 Plch2 Dock5	Core	1.119627746	1756.695934	0	0	0	0	0	0	0	0	0	0.559813873	248.5573596	0	0	0	0	0	0
F2S4_160404_050_D01	VISp	L1	GABAergic	Lamp5	5	Lamp5 Plch2 Dock5	Core	0	2785.260923	0.515980164	0	0	0	0	0	0	18.05930573	0	0	444.7749011	0	0	0	0	0	0
F2S4_160404_050_E01	VISp	L1	GABAergic	Lamp5	5	Lamp5 Plch2 Dock5	Core	1.00878704	3559.000675	1.513180559	0	0	0	0	0	0	26.22846303	0	0.50439352	251.1879728	0	0	0	0	0	0
F2S4_160405_001_F01	VISp	L1	GABAergic	Lamp5	5	Lamp5 Plch2 Dock5	Core	0	6436.065163	0	0	0	0	0	0	0	62.5749755	0	0	371.8886756	0	0	0	0	0	0
F2S4_160405_002_A01	VISp	L1	GABAergic	Lamp5	5	Lamp5 Plch2 Dock5	Core	0	1936.239576	0	0	0	0	0	0	0	0	0	0	400.44614	0	0	0	0	0	0
F2S4_160405_002_B01	VISp	L1	GABAergic	Lamp5	5	Lamp5 Plch2 Dock5	Core	0	8483.477536	0	0	0	0	0	0	0	32.0791519	51.03501439	0	79.71183201	0	0	0	0	0	0
F2S4_160405_002_D01	VISp	L1	GABAergic	Lamp5	5	Lamp5 Plch2 Dock5	Core	0	1858.843208	0	0	0	0	0	0	0	0	0	0	192.9679546	3.419685272	0	48.36412027	0	0	0
F2S4_160405_002_E01	VISp	L1	GABAergic	Lamp5	5	Lamp5 Plch2 Dock5	Core	0	2316.053325	0	10.50882353	0	0	0	0	0	0	0	0	292.8763427	0	0	0	0	0	0
F2S4_160405_002_F01	VISp	L1	GABAergic	Lamp5	5	Lamp5 Plch2 Dock5	Core	0	1668.134477	0	0	0	0	0	0	0	9.661943104	0	0	221.2584971	0	0	0	0	0	0
F2S4_160405_003_F01	VISp	L1	GABAergic	Lamp5	5	Lamp5 Plch2 Dock5	Intermediate	0	698.8687094	0	0	0	0	0	0	0	0	0	0	106.3167251	0	0	102.7896299	0	0	0
F2S4_160405_003_G01	VISp	L1	GABAergic	Lamp5	5	Lamp5 Plch2 Dock5	Core	0	1972.929941	0	0	0	0	0	0	0	10.73995613	24.70189909	0	226.0760765	17.1839298	0	0	0	0	0
F2S4_160405_009_B01	VISp	L1	GABAergic	Lamp5	5	Lamp5 Plch2 Dock5	Core	0.825597485	12202.33083	0	101.5484906	0	0	0.412798742	0	0	27.244717	0.412798742	0	215.4809436	0.412798742	0	0	0	0	0
F2S4_160405_009_D01	VISp	L1	GABAergic	Lamp5	5	Lamp5 Plch2 Dock5	Core	1.36268001	1259.570556	0	0	0	0	0	0	0	0	0.45422667	0	481.4802702	0	0	19.98597348	0	0	0
F2S4_160405_010_B01	VISp	L1	GABAergic	Lamp5	5	Lamp5 Plch2 Dock5	Core	5.160691017	2194.153797	0	0	0	0	0	0	0	0	0	0	308.7813458	0	0	0	0	0	0
F2S4_160405_010_G01	VISp	L1	GABAergic	Lamp5	5	Lamp5 Plch2 Dock5	Core	1.591253621	6501.331879	0	0	0	0	0	0	0	9.547521729	70.01515934	0	76.9105917	0	0	0	0	0	0
F2S4_160405_011_A01	VISp	L1	GABAergic	Lamp5	5	Lamp5 Plch2 Dock5	Core	0	5959.542402	0	0	0	0	0	0	0	8.010810589	0	0	64.58716037	0	0	0	0	0	0
F2S4_160405_011_C01	VISp	L1	GABAergic	Lamp5	5	Lamp5 Plch2 Dock5	Core	0	786.5493654	0	0	0	0	23.28791608	0	0	0	0	0	96.64485171	0	0	0	0	0	45.41143635
F2S4_160405_011_D01	VISp	L1	GABAergic	Lamp5	5	Lamp5 Plch2 Dock5	Core	0	3588.08098	0	0	0	0	0	0	0	4.22513788	0	0	432.8419029	0	0	0	0	0	0
F2S4_160405_011_F01	VISp	L1	GABAergic	Lamp5	5	Lamp5 Plch2 Dock5	Core	0	2081.478264	0	180.0067683	0	0	0	0	0	21.00078963	0	0	85.20320364	0	0	0	0	0	0
F2S4_160405_012_E01	VISp	L1	GABAergic	Lamp5	5	Lamp5 Plch2 Dock5	Core	0	1224.69643	0	0	0	0	0	0	0	0	0	0	411.0168099	11.13866694	0	0	0	0	0
F2S4_160405_014_F01	VISp	L1	GABAergic	Lamp5	5	Lamp5 Plch2 Dock5	Core	0	3355.946084	0	44.81972511	0	0	0	0	0	48.13970474	24.89984728	0	299.9048273	39.28642571	0	0	0	0	0
F2S4_160405_016_A01	VISp	L1	GABAergic	Lamp5	5	Lamp5 Plch2 Dock5	Core	0	1397.920034	0	0	0	0	21.67317883	0	0	0	0	0	126.2698245	0	0	0	0	0	0
F2S4_160405_016_G01	VISp	L1	GABAergic	Lamp5	5	Lamp5 Plch2 Dock5	Core	0	1029.21154	0	30.42004552	0	0	0	0	0	0	0	0	156.7093254	0	0	28.11549662	0	0	0
F2S4_160405_017_E01	VISp	L1	GABAergic	Lamp5	5	Lamp5 Plch2 Dock5	Core	0	3307.234909	0	13.76432439	0	0	0	0	0	0	0	0	575.728465	0	0	0	0	0	0
F2S4_160405_020_A01	VISp	L1	GABAergic	Lamp5	5	Lamp5 Plch2 Dock5	Core	0	5663.877046	0	496.3975517	0	0	0	0	0	10.46048481	0	0	371.3472106	0	0	0	0	0	0
F2S4_160405_020_B01	VISp	L1	GABAergic	Lamp5	5	Lamp5 Plch2 Dock5	Core	0	11455.4743	0	994.3538815	0	0	0	0	0	22.89303231	0	0	147.3116861	0	0	0	0	0	0
F2S4_160405_020_D01	VISp	L1	GABAergic	Lamp5	5	Lamp5 Plch2 Dock5	Core	0	1177.085064	0	0	0	0	0	0	0	0	0	0	111.8447985	0	0	0	0	0	0
F2S4_160405_020_G01	VISp	L1	GABAergic	Lamp5	5	Lamp5 Plch2 Dock5	Core	0	2207.133979	0	0	0	0	0	0	0	22.08115364	0	0	182.5375367	0.490692303	0	0	0	0	0
F2S4_160405_021_C01	VISp	L1	GABAergic	Lamp5	5	Lamp5 Plch2 Dock5	Core	0	848.7742688	0	0	0	0	0	0	0	11.66848537	0	0	61.3675897	0	0	0	0	0	0
F2S4_160405_022_F01	VISp	L1	GABAergic	Lamp5	5	Lamp5 Plch2 Dock5	Intermediate	1.321664504	2037.566111	0	0	0.440554835	0	0	0	0	18.50330306	0	0	494.7430794	0	0	0	0	0	0
F2S4_160405_023_E01	VISp	L1	GABAergic	Lamp5	5	Lamp5 Plch2 Dock5	Core	2.110481601	1484.723807	0	0	0	0	0	0	0	0	0	0	100.2478761	0	0	0	0	0	0
F2S4_160405_023_G01	VISp	L1	GABAergic	Lamp5	5	Lamp5 Plch2 Dock5	Core	1.13744809	532.89443	0	0	0	0	0	0	0	0	0.568724045	0	229.1957901	0	0	0	0	0	0
F2S4_160405_031_A01	VISp	L1	GABAergic	Lamp5	5	Lamp5 Plch2 Dock5	Core	1.641107332	4544.226201	0	124.1771214	0	3.829250441	0	0	0	16.95810909	111.5952986	0	194.7447367	13.67589443	0	0	0	0	0
F2S4_160405_032_A01	VISp	L1	GABAergic	Lamp5	5	Lamp5 Plch2 Dock5	Core	0.535202689	3726.081123	0	0.535202689	0	0	0	0	0	16.05608068	66.36513347	0	243.5172236	0	0	0	0	0	0
F2S4_160405_032_C01	VISp	L1	GABAergic	Lamp5	5	Lamp5 Plch2 Dock5	Core	0.527895029	1316.570203	0	0	0	0	43.28739239	0	0	7.918425437	0	0	192.1537906	0	0	1.583685087	0	0	0
F2S4_160405_032_D01	VISp	L1	GABAergic	Lamp5	5	Lamp5 Plch2 Dock5	Core	4.823533699	1593.373965	0	533.2684479	0	0	0	0	0	15.54249748	0	0	378.9153695	0	0	61.09809353	0	0	0
F2S4_160405_032_G01	VISp	L1	GABAergic	Lamp5	5	Lamp5 Plch2 Dock5	Intermediate	1.377445885	9299.137168	0.918297256	876.0555827	0.459148628	0	0.459148628	0	0	152.4373446	0	0	307.1704323	0	0	0	0	0	0
F2S4_160405_033_A01	VISp	L1	GABAergic	Lamp5	5	Lamp5 Plch2 Dock5	Core	1.587040439	1893.339244	0	26.97968747	0	0.52901348	0	0	0	16.39941787	129.0792891	0	215.8374998	0	0	90.46130504	0	0	0
F2S4_160405_033_C01	VISp	L1	GABAergic	Lamp5	5	Lamp5 Plch2 Dock5	Core	0	2724.208563	0	0	0.491911983	0	0.491911983	0	0	59.02943798	0	0	259.7295271	34.92575081	0	0	0	0	0
F2S4_160405_040_D01	VISp	L4	GABAergic	Lamp5	5	Lamp5 Plch2 Dock5	Core	10.18106215	18957.67357	1.071690753	0	0	0.535845376	0.535845376	0	0.535845376	28.39980495	311.3261637	0	70.19574432	0	0	0	0	0	0
F2S4_160405_042_C01	VISp	L1	GABAergic	Lamp5	5	Lamp5 Plch2 Dock5	Core	4.506798506	4284.275329	0	0.563349813	0	0.563349813	0	0	0	41.68788618	72.10877609	0	616.3046956	0	0	0	0	0	0
F2S4_160405_042_G01	VISp	L1	GABAergic	Lamp5	5	Lamp5 Plch2 Dock5	Intermediate	4.253302098	3305.760909	0.945178244	844.9893502	0	0	0	1.417767366	0	94.51782441	0.472589122	0	602.5511306	0	0	23.15686698	0	0	0
F2S4_160405_043_B01	VISp	L1	GABAergic	Lamp5	5	Lamp5 Plch2 Dock5	Core	0.560673885	1275.533089	0	29.71571591	0	0	0	0	0	10.09212993	0	0	611.6952087	0	0	0	0	0	0
F2S4_160405_043_C01	VISp	L1	GABAergic	Lamp5	5	Lamp5 Plch2 Dock5	Core	1.751287926	1091.052378	0	0	0	0	140.1030341	0	0	0	0	0	231.1700063	0	0	180.9664191	0	0	16.92911662
F2S4_160405_043_D01	VISp	L1	GABAergic	Lamp5	5	Lamp5 Plch2 Dock5	Core	0	1504.06527	1.130026499	1.130026499	0	0	0	0	0	0	0	0	547.4978388	55.37129846	0	0	0	0	0
F2S4_160405_043_E01	VISp	L1	GABAergic	Lamp5	5	Lamp5 Plch2 Dock5	Intermediate	3.697601683	142.6217792	0	1434.141224	0	0	1.584686435	0	0	48.59705069	0	0	489.6681086	0	0	117.2667962	0	0	0
F2S4_160405_043_H01	VISp	L1	GABAergic	Lamp5	5	Lamp5 Plch2 Dock5	Core	0	1424.708098	0	0	0	0	0	0	0	0	0	0	62.9410541	0	0	64.00785163	0	0	0
F2S4_160405_044_A01	VISp	L1	GABAergic	Lamp5	5	Lamp5 Plch2 Dock5	Core	0	11625.21441	0	0	0	0	0.542296702	0	0	86.22517569	289.0441424	0	469.6289443	5.965263727	0	0	0	0	0
F2S4_160405_044_C01	VISp	L1	GABAergic	Lamp5	5	Lamp5 Plch2 Dock5	Intermediate	0.535985245	9523.921825	0.535985245	93.79741794	0.535985245	2.143940982	0.535985245	0	0	61.63830322	0	0	160.7955736	0	0	0	0	0	0
F2S4_160413_007_E01	VISp	L1	GABAergic	Lamp5	5	Lamp5 Plch2 Dock5	Core	3.114789331	2089.634293	0	0.389348666	0.389348666	0	0	0	0	22.19287398	0	0	204.0187012	0	0	0	0	0	0
F2S4_160413_007_H01	VISp	L1	GABAergic	Lamp5	5	Lamp5 Plch2 Dock5	Core	7.308762025	7252.540779	1.68663739	0	0	0	0	0	0	47.78805939	0	0	168.663739	0	0	0	0	0	0
F2S4_160413_008_C01	VISp	L1	GABAergic	Lamp5	5	Lamp5 Plch2 Dock5	Core	1.688377798	2549.450475	0.42209445	0.42209445	0	0	0.42209445	0	0	6.753511193	0	0	375.6640601	0	0	62.04788408	0	0	0
F2S4_160413_008_H01	VISp	L1	GABAergic	Lamp5	5	Lamp5 Plch2 Dock5	Core	0	4795.465809	2.26094569	35.72294191	0	0	0	0	0	33.46199622	0	0	434.5537617	0	0	0	0	0	0
F2S4_160413_009_A01	VISp	L1	GABAergic	Lamp5	5	Lamp5 Plch2 Dock5	Core	0	1761.216249	0	0	0	0	0	0	0	0	0	0.444639295	394.8396942	0	0	0	0	0	0
F2S4_160413_009_H01	VISp	L1	GABAergic	Lamp5	5	Lamp5 Plch2 Dock5	Core	0	6216.920022	0.48638085	0.48638085	0	0	30.64199354	0	0	36.47856374	0.48638085	0	294.746795	1.459142549	0	0	0	0	0
F2S4_160414_008_C01	VISp	L1	GABAergic	Lamp5	5	Lamp5 Plch2 Dock5	Core	1.100097304	18439.831	1.100097304	101.7590006	0	0	0	0	0	370.7327913	0	0	113.8600709	0	0	0	0	0	0
F2S4_160414_009_D01	VISp	L1	GABAergic	Lamp5	5	Lamp5 Plch2 Dock5	Core	2.105674319	4800.411028	0	0	0	0	0	0	0	52.64185796	155.8198996	0	662.7609918	0	0	0	0	0	0
F2S4_160414_009_F01	VISp	L1	GABAergic	Lamp5	5	Lamp5 Plch2 Dock5	Core	1.977602661	0.494400665	1.483201996	0	0	0	87.50891775	0	0.494400665	0	0	0	175.0178355	0	0	0	0	0	0
F2S4_160414_009_H01	VISp	L1	GABAergic	Lamp5	5	Lamp5 Plch2 Dock5	Core	0.642549637	6374.092399	0	0	0.642549637	0	0	0	0	0	0	0	271.1559468	0	0	124.0120799	0	0	0
F2S4_160414_010_F01	VISp	L1	GABAergic	Lamp5	5	Lamp5 Plch2 Dock5	Core	2.318154675	9612.923805	0.92726187	2.78178561	0	0	0	0	0	180.8160646	0	0	250.3607049	0	0	0	0	0	0
F2S4_160414_010_H01	VISp	L1	GABAergic	Lamp5	5	Lamp5 Plch2 Dock5	Core	0	7058.975785	1.437966141	0	0.479322047	0	0	0	0	28.75932281	0	0	333.1288226	0	0	0	0	0	0
F2S4_160415_015_F01	VISp	L1	GABAergic	Lamp5	5	Lamp5 Plch2 Dock5	Core	0.484908202	6021.590053	0.969816404	0	0	0	0	0	0	40.24738077	41.21719717	0	680.3262074	0	0	0	0	0	0
F2S4_160415_015_H01	VISp	L1	GABAergic	Lamp5	5	Lamp5 Plch2 Dock5	Core	4.361190291	7488.599849	0	106.8491621	0.872238058	0.436119029	0	0	0	150.8971841	0.436119029	0	178.3726829	0	0	0	0	0	0
F2S4_160415_016_A01	VISp	L1	GABAergic	Lamp5	5	Lamp5 Plch2 Dock5	Core	0.448098137	7014.528238	0.448098137	0	0	0	0	0	0	43.91361743	0	0	352.6532339	0	0	0	0	0	0
F2S4_160415_016_E01	VISp	L1	GABAergic	Lamp5	5	Lamp5 Plch2 Dock5	Core	30.75011543	3216.269886	0	252.2470407	0	0.480470554	0.480470554	0.480470554	0.480470554	16.81646938	0	0	496.3260819	0	0	0	0	0	0
F2S4_160415_016_F01	VISp	L1	GABAergic	Lamp5	5	Lamp5 Plch2 Dock5	Core	0.480732482	3667.988841	0	0	0	0	0	0	0	9.133917167	56.24570045	0	91.81990415	0	0	0	0	0	0
F2S4_160415_017_C01	VISp	L1	GABAergic	Lamp5	5	Lamp5 Plch2 Dock5	Core	0	4147.681749	1.517444542	0	0	0	0	0	0	101.1629695	0	0	310.5703164	0	0	0	0	0	0
F2S4_160415_018_C01	VISp	L1	GABAergic	Lamp5	5	Lamp5 Plch2 Dock5	Core	0	2103.959845	0.494467649	0	0	0	0	0	0	13.35062652	13.84509416	0	204.2151389	0	0	0	0	0	0
F2S4_160415_018_E01	VISp	L1	GABAergic	Lamp5	5	Lamp5 Plch2 Dock5	Core	2.949882963	1446.548858	0.36873537	0	0.36873537	1.106206111	0.36873537	0	0	0	0	0	306.7878282	0	0	0	0	0	0
F2S4_160415_020_B01	VISp	L1	GABAergic	Lamp5	5	Lamp5 Plch2 Dock5	Core	1.317918953	3904.993858	1.317918953	61.9421908	0.658959477	0	0	0	0	0	0	0	328.1618194	4.612716336	0	0	0	0	0
F2S4_160415_020_D01	VISp	L1	GABAergic	Lamp5	5	Lamp5 Plch2 Dock5	Core	1.147217224	4804.545734	0	0	0	0	0	1.147217224	0	0	0	0	76.28994539	22.94434448	0	0	0	0	0
F2S4_160415_021_A01	VISp	L1	GABAergic	Lamp5	5	Lamp5 Plch2 Dock5	Core	1.18424621	4997.519004	0.592123105	175.268439	0.592123105	0	0	0	0	24.8691704	0	0	324.4834614	0	0	0	0	0	0
F2S4_160415_021_D01	VISp	L1	GABAergic	Lamp5	5	Lamp5 Plch2 Dock5	Core	1.527386809	4947.205875	0.509128936	0	0	0	0	0	0	0	0	0	198.0511563	0	0	0	0	0	0
F2S4_160415_021_E01	VISp	L1	GABAergic	Lamp5	5	Lamp5 Plch2 Dock5	Core	1.946562954	1732.92767	0	0	0.486640738	0.973281477	0.486640738	0.486640738	0	0	0	0	284.684832	0	0	0	0	0	0
F2S4_160415_021_G01	VISp	L1	GABAergic	Lamp5	5	Lamp5 Plch2 Dock5	Core	0	4006.52716	0.448910606	47.58452426	0	0	0	0	0	18.85424546	11.22276515	0	253.6344925	0	0	0	0	0	0
F2S4_160415_023_D01	VISp	L1	GABAergic	Lamp5	5	Lamp5 Plch2 Dock5	Core	2.876477719	5407.778111	0.575295544	0	0	0	0	0	0	0	48.32482567	0	256.5818125	0	0	55.80366774	0	0	0
F2S4_160415_023_E01	VISp	L1	GABAergic	Lamp5	5	Lamp5 Plch2 Dock5	Core	5.103196196	5059.819028	0.637899524	0.637899524	0.637899524	0	0.637899524	0	0.637899524	66.34155054	0	0	137.1483978	0	0	0	0	0	0
F2S4_160419_001_C01	VISp	L1	GABAergic	Lamp5	5	Lamp5 Plch2 Dock5	Core	0	1370.650378	32.22660114	1.22379498	0	0	45.28041426	0	0	0	0	0	395.2857786	0	0	0	0	0	0
F2S4_160419_001_H01	VISp	L1	GABAergic	Lamp5	5	Lamp5 Plch2 Dock5	Core	0	5306.029337	0	16.2482525	0	0	0	0	0	25.3472739	42.2454565	0.6499301	272.3207119	0	0	0	0	0	0
F2S4_160419_002_H01	VISp	L1	GABAergic	Lamp5	5	Lamp5 Plch2 Dock5	Intermediate	2.83442695	8543.671433	0	0	0	0	0	0	0	101.3307635	0	0	723.4874789	7.086067374	0	0	0	0	0
F2S4_160419_003_B01	VISp	L1	GABAergic	Lamp5	5	Lamp5 Plch2 Dock5	Core	0.562736384	2077.059995	3.376418307	19.69577346	0	0	0	0	0	0	0	0	104.6689675	0	0	0	0	0	0
F2S4_160419_003_F01	VISp	L1	GABAergic	Lamp5	5	Lamp5 Plch2 Dock5	Intermediate	2.423164483	1411.493311	2.423164483	0	0.605791121	0	0	0	0	32.1069294	0	0	359.2341346	0	0	41.79958734	0	0	0
F2S4_160419_003_G01	VISp	L1	GABAergic	Lamp5	5	Lamp5 Plch2 Dock5	Core	3.402498017	3720.388546	0.486071145	579.8828763	0	0.486071145	0.486071145	0	0	38.88569162	0	0	460.7954457	0	0	0	0	0	0
F2S4_160419_011_F01	VISp	L2/3	GABAergic	Lamp5	5	Lamp5 Plch2 Dock5	Core	0.661605823	4728.496818	0.661605823	0	0	0	0	0	0	41.68116686	0	0	457.8312296	23.81780963	0	0	0	0	0
F2S4_160419_014_D01	VISp	L1	GABAergic	Lamp5	5	Lamp5 Plch2 Dock5	Core	0.50504974	3956.054612	2.020198959	0.50504974	0	0	0	0	0	0	0	0	226.2622834	0	0	0	0	0	0
F2S4_160419_016_G01	VISp	L4	GABAergic	Lamp5	5	Lamp5 Plch2 Dock5	Core	7.208390123	20470.71896	0	1.663474644	0.554491548	0	0	0	0	89.82763076	163.0205151	0	229.5595008	7.76288167	0	0	0	0	0
F2S4_160422_009_B01	VISp	L2/3	GABAergic	Lamp5	5	Lamp5 Plch2 Dock5	Core	1.440920114	13638.30888	0	337.8957667	0	0.720460057	0	0	0	66.28232524	33.14116262	0	503.6015798	0	0	0	0	0	0
F2S4_160429_001_A01	VISp	L1	GABAergic	Lamp5	5	Lamp5 Plch2 Dock5	Core	3.149468842	4219.838324	1.349772361	0	0	0	0	0	0	18.89681305	0	0	355.8899792	0	0	0	0	0	0
F2S4_160429_001_D01	VISp	L1	GABAergic	Lamp5	5	Lamp5 Plch2 Dock5	Core	0	1898.391823	2.068528273	31.0279241	0	0	0	0	0	0	0	0	119.4575078	0	0	0	0	0	0
F2S4_160429_001_F01	VISp	L1	GABAergic	Lamp5	5	Lamp5 Plch2 Dock5	Core	3.169694102	3795.935094	0.905626886	0	0	0	0	0	0	18.56535117	33.05538135	0	283.008402	0	0	0	0	0	0
F2S4_160429_002_A01	VISp	L1	GABAergic	Lamp5	5	Lamp5 Plch2 Dock5	Core	1.009732305	2238.071654	2.01946461	0	0	0	0	0	0	0	63.6131352	0	265.05473	0	0	79.26398593	0	0	0
F2S4_160429_002_C01	VISp	L1	GABAergic	Lamp5	5	Lamp5 Plch2 Dock5	Core	3.517611214	1092.80455	4.103879749	0	0.586268536	1.172537071	134.8417632	0	0	8.794028034	0	0	476.0500509	4.103879749	0	0	0	0	0
F2S4_160429_002_H01	VISp	L1	GABAergic	Lamp5	5	Lamp5 Plch2 Dock5	Core	0	1441.101904	0.566916563	161.5712206	0	0	0	0	0	26.07816192	0	0	226.1997088	0	0	0	0	0	0
F2S4_160429_003_B01	VISp	L1	GABAergic	Lamp5	5	Lamp5 Plch2 Dock5	Core	0.953413363	5831.076127	0.953413363	118.6999637	0	0	36.70641447	0	0	82.47025589	0	0	698.3752883	0	0	0	0	0	0
F2S4_160429_007_C01	VISp	L1	GABAergic	Lamp5	5	Lamp5 Plch2 Dock5	Core	6.372149766	2377.970436	0.579286342	1.158572685	1.158572685	0.579286342	1.158572685	0	0	53.2943435	0	0	461.1119285	0	0	0	0	0	0
F2S4_160429_007_G01	VISp	L1	GABAergic	Lamp5	5	Lamp5 Plch2 Dock5	Core	1.748183746	1621.440425	0	0.437045937	0	0	0	0.437045937	0.437045937	0	0	0	369.7408624	0	0	0	0	0	0
F2S4_160429_008_A01	VISp	L1	GABAergic	Lamp5	5	Lamp5 Plch2 Dock5	Core	4.324434188	16156.62668	1.621662821	0	0.540554274	0	0.540554274	0	0	40.54157052	76.21815257	0	232.4383376	0	0	0	0	0	0
F2S4_160429_008_E01	VISp	L1	GABAergic	Lamp5	5	Lamp5 Plch2 Dock5	Core	27.53774047	2610.577797	1.376887024	31.66840154	0	2.753774047	0	0	19.27641833	0	0	0	421.3274292	17.89953131	0	0	0	0	0
F2S4_160429_008_H01	VISp	L1	GABAergic	Lamp5	5	Lamp5 Plch2 Dock5	Core	6.637906428	1451.89117	1.810338117	1.206892078	0.603446039	0.603446039	0	0	0	0.603446039	5.431014351	0	32.5860861	54.31014351	0	0	0	0	0
F2S4_160429_009_G01	VISp	L1	GABAergic	Lamp5	5	Lamp5 Plch2 Dock5	Core	3.952580887	5983.219318	0	0.494072611	0	0	0	0	0	89.42714257	0	0	396.7403065	14.82217833	0	0	0	0	0
F2S4_160429_015_B01	VISp	L5	GABAergic	Lamp5	5	Lamp5 Plch2 Dock5	Core	5.31644476	1538.446203	1.32911119	68.44922629	0	0.664555595	163.4806764	0	0	35.22144654	6.645555951	0	1226.769628	44.52522487	0	0	0	0	0
F2S4_160502_007_A01	VISp	L1	GABAergic	Lamp5	5	Lamp5 Plch2 Dock5	Core	1.811496572	3252.99497	1.811496572	229.1543164	0	0	0	0	0	0	0	0	259.9497581	0	0	0	0	0	0
F2S4_160502_007_D01	VISp	L1	GABAergic	Lamp5	5	Lamp5 Plch2 Dock5	Core	0.425379321	2374.467372	0.850758643	37.8587596	0	0	0	0	0	0	0	0	363.6993198	0	0	0	0	0	0
F2S4_160502_007_E01	VISp	L1	GABAergic	Lamp5	5	Lamp5 Plch2 Dock5	Core	2.416057699	2427.654776	6.764961558	0	0.48321154	0.48321154	1.44963462	0	0	0	0	0	459.0509629	0	0	0	0	0	0
F2S4_160502_007_F01	VISp	L1	GABAergic	Lamp5	5	Lamp5 Plch2 Dock5	Core	1.669039484	6138.309964	0.417259871	0	0	0.417259871	0	0	0	65.92705964	0	0	107.2357869	0	0	0	0	0	0
F2S4_160502_007_G01	VISp	L1	GABAergic	Lamp5	5	Lamp5 Plch2 Dock5	Core	2.280020228	2837.713176	0	166.8974807	0	0	1.368012137	0	0	0	0	0	457.3720578	0	0	0	0	0	0
F2S4_160502_007_H01	VISp	L1	GABAergic	Lamp5	5	Lamp5 Plch2 Dock5	Core	0.93267182	6941.410023	2.331679551	0	0	0	0	0	0	31.71084189	0	0	364.2083458	0	0	0	0	0	0
F2S4_160502_008_F01	VISp	L1	GABAergic	Lamp5	5	Lamp5 Plch2 Dock5	Core	1.350914434	6369.561556	0.900609623	154.4545503	0.450304811	0.450304811	0	0	0	34.67347047	0.450304811	0	353.9395817	0	0	0	0	0	0
F2S4_160502_012_G01	VISp	L2/3	GABAergic	Lamp5	5	Lamp5 Plch2 Dock5	Core	3.466851697	11050.34215	0	0	0.495264528	0	0.495264528	0	0.495264528	196.6200177	0	0	879.5898021	0	0	0	0	0	0
F2S4_160502_014_B01	VISp	L2/3	GABAergic	Lamp5	5	Lamp5 Plch2 Dock5	Core	2.656735435	6213.572836	0	0	0	0.531347087	0	0	0	21.25388348	14.34637135	0	345.9069537	6.376165045	0	0	0	0	0
F2S4_160502_017_F01	VISp	L1	GABAergic	Lamp5	5	Lamp5 Plch2 Dock5	Core	0.503107949	1631.57908	0.503107949	82.00659575	0	0	0	0	0	20.12431797	0	0	367.268803	0	0	0	0	0	0
F2S4_160502_017_H01	VISp	L1	GABAergic	Lamp5	5	Lamp5 Plch2 Dock5	Core	0	1935.905411	1.010652786	0	0	0.505326393	0	0	0	61.14449353	0	0	362.3190237	16.17044457	0	0	0	0	0
F2S4_160502_018_B01	VISp	L1	GABAergic	Lamp5	5	Lamp5 Plch2 Dock5	Core	0.562629686	2489.073731	1.125259372	0	0.562629686	0	0	0.562629686	0	15.75363121	0	0	434.9127474	0	0	0	0	0	0
F2S4_160502_018_F01	VISp	L1	GABAergic	Lamp5	5	Lamp5 Plch2 Dock5	Core	2.13021243	8566.116735	1.065106215	80.94807234	0.532553108	0	0	0	0	74.55743505	169.3518882	0	238.5837922	0	0	0	0	0	0
F2S4_160502_019_D01	VISp	L1	GABAergic	Lamp5	5	Lamp5 Plch2 Dock5	Intermediate	1.561005662	28579.412	3.642346545	339.2585639	1.040670442	0	0	0	0	304.3961041	0	0	323.6485073	0	0	0	0	0	0
F2S4_160502_019_E01	VISp	L1	GABAergic	Lamp5	5	Lamp5 Plch2 Dock5	Core	4.385512897	751.6769105	0.877102579	0	1.315653869	1.315653869	1.315653869	0	0	6.139718055	0	0	37.71541091	0	0	0	0	0	4.385512897
F2S4_160502_019_F01	VISp	L1	GABAergic	Lamp5	5	Lamp5 Plch2 Dock5	Core	1.698011968	2151.805666	0	134.5674484	0.424502992	0.424502992	0	0	0	0.424502992	0	0	589.2101528	0	0	58.58141288	0	0	0
F2S4_160504_001_F01	VISp	L1	GABAergic	Lamp5	5	Lamp5 Plch2 Dock5	Core	10.87522743	3085.302021	1.631284114	191.9477641	1.087522743	1.087522743	1.087522743	0	0	12.50651154	0	0	105.4897061	0	0	0	0	0	0
F2S4_160504_001_G01	VISp	L1	GABAergic	Lamp5	5	Lamp5 Plch2 Dock5	Core	2.62097366	1785.931452	0	0.524194732	0	0	0	0	0	0.524194732	3.669363124	0.524194732	593.9126314	0	0	0	0	0	0
F2S4_160504_002_A01	VISp	L1	GABAergic	Lamp5	5	Lamp5 Plch2 Dock5	Intermediate	7.748367879	1550.642122	0.484272992	0	0	1.93709197	0.484272992	0	0	18.8866467	0	0	88.62195762	0	0	0	0	0	0
F2S4_160504_002_B01	VISp	L1	GABAergic	Lamp5	5	Lamp5 Plch2 Dock5	Core	6.082882313	2303.891676	1.520720578	1.520720578	1.013813719	0.506906859	1.520720578	0	0	19.26246066	0	0	260.5501257	0	0	0	0	0	0
F2S4_160504_002_D01	VISp	L1	GABAergic	Lamp5	5	Lamp5 Plch2 Dock5	Core	3.926948932	3446.388557	0.981737233	88.8472196	0.490868617	0.490868617	0	0	0	15.70779573	0	0	591.9875516	0	0	0	0	0	0
F2S4_160504_003_E01	VISp	L1	GABAergic	Lamp5	5	Lamp5 Plch2 Dock5	Core	13.09595089	1405.457449	0.523838036	0	0.523838036	0	35.62098642	0	0	0	0	0	86.43327587	147.198488	0	0	0	0	0
F2S4_160504_003_F01	VISp	L1	GABAergic	Lamp5	5	Lamp5 Plch2 Dock5	Core	3.838609502	4266.827718	0	52.8875087	0	0	0	0	0	83.16987255	39.66563152	0	599.2495945	0	0	0	0	0	0
F2S4_160504_004_B01	VISp	L1	GABAergic	Lamp5	5	Lamp5 Plch2 Dock5	Core	13.56217579	5871.417514	0	1.004605614	2.511514036	1.004605614	0.502302807	0	0	0.502302807	131.6033355	0	439.5149563	0	0	0	0	0	0
F2S4_160504_005_C01	VISp	L1	GABAergic	Lamp5	5	Lamp5 Plch2 Dock5	Core	7.508941003	1698.629726	0	482.7176359	0.536352929	1.072705858	2.145411715	0	0	27.35399937	0	0	304.6484636	0	0	0	0	0	0
F2S4_160504_005_E01	VISp	L1	GABAergic	Lamp5	5	Lamp5 Plch2 Dock5	Core	2.727120009	2233.511287	1.090848003	0	0.545424002	0.545424002	0.545424002	0	0	0	0.545424002	0	125.4475204	0	0	0	0	0	0
F2S4_160504_005_H01	VISp	L1	GABAergic	Lamp5	5	Lamp5 Plch2 Dock5	Core	8.135996671	4936.225409	1.162285239	2.905713097	0.581142619	0.581142619	0.581142619	0	0	0	0	0	277.2050294	0	0	73.80511266	0	0	0
F2S4_160504_006_C01	VISp	L1	GABAergic	Lamp5	5	Lamp5 Plch2 Dock5	Core	0	4460.224984	0	0.555652795	0	0.555652795	0.555652795	0	0	0	0	0.555652795	132.801018	0	0	0	0	0	0
F2S4_160504_006_G01	VISp	L1	GABAergic	Lamp5	5	Lamp5 Plch2 Dock5	Core	2.08060146	5355.988309	0	0	0	0	0.520150365	0	0	13.00375913	0	0	345.3798424	0	0	0	0	0	0
F2S4_160504_009_D01	VISp	L1	GABAergic	Lamp5	5	Lamp5 Plch2 Dock5	Core	2.45111977	8418.615961	0.980447908	620.6235257	0.490223954	0	0	0	0	8.82403117	0	0	237.2683937	0	0	0	0	0	0
F2S4_160504_010_G01	VISp	L1	GABAergic	Lamp5	5	Lamp5 Plch2 Dock5	Core	0.449464463	1673.805661	0	1369.967684	0	0	0.449464463	0	0	98.88218188	0	0	690.8268798	0	0	88.99396369	0	0	0
F2S4_160516_008_H01	VISp	L2/3	GABAergic	Lamp5	5	Lamp5 Plch2 Dock5	Core	0	9276.458595	0	55.29097341	0	0	0	0	0	0	0	0	90.70204626	0	0	0	0	0	0
F2S4_160516_014_H01	VISp	L2/3	GABAergic	Lamp5	5	Lamp5 Plch2 Dock5	Core	3.948870031	6357.116625	2.25649716	0	0.56412429	0	0.56412429	0	0	0	0.56412429	0	85.7468921	0	0	0	0	0	0
F2S4_160616_011_F01	VISp	L1	GABAergic	Lamp5	5	Lamp5 Plch2 Dock5	Core	0	29380.78175	0	0	0	0	0	0	0	527.736994	0	0	470.7537193	37.47548692	0	0	0	0	0
F2S4_160616_013_H01	VISp	L1	GABAergic	Lamp5	5	Lamp5 Plch2 Dock5	Core	0	3397.57885	0	93.54410033	0	0	0	0	0	143.5294975	0	0	871.8881413	0	0	0	0	0	0
F2S4_160616_014_E01	VISp	L1	GABAergic	Lamp5	5	Lamp5 Plch2 Dock5	Core	10.62723172	12774.55766	2.50052511	0	0	0	0	0	0	248.1771172	0	0	471.9741146	0	0	0	0	0	0
F2S4_160616_015_H01	VISp	L1	GABAergic	Lamp5	5	Lamp5 Plch2 Dock5	Core	0	6795.797787	0	0	0	0	0	0	0	95.72373308	4.698097329	0	564.3589417	0	0	67.53514911	0	0	0
F2S4_160802_006_C01	VISp	L1-L4	GABAergic	Lamp5	5	Lamp5 Plch2 Dock5	Core	2.896920332	3960.090094	1.448460166	0	0	0	0	0	0	16.41588188	334.5942984	0	545.5866626	60.83532698	0	0	0	0	0
F2S4_160802_007_F01	VISp	L1-L4	GABAergic	Lamp5	5	Lamp5 Plch2 Dock5	Core	1.488279797	692.0501054	1.984373062	84.83194841	0	0	0	0.496093266	0	55.56244574	0	0	205.3826119	0	0	149.8201662	0	0	0
F2S4_160826_001_C01	VISp	L2/3	GABAergic	Lamp5	5	Lamp5 Plch2 Dock5	Core	0	30766.7284	0	0	0	0	0	0	0	122.8715277	75.53577525	0	246.7501992	5.03571835	0	0	0	0	0
F2S4_161004_010_B01	VISp	L1-L2/3	GABAergic	Lamp5	5	Lamp5 Plch2 Dock5	Core	0.541150725	3702.012107	0	1.623452174	0	0	0	0	0	7.034959419	0	0	219.7071942	4.870356521	0	0	0	0	0
F2S4_161004_011_E01	VISp	L1-L2/3	GABAergic	Lamp5	5	Lamp5 Plch2 Dock5	Core	4.788910798	3646.755573	0	42.50158333	0	0	0	0	0	0	0	0	283.1443509	27.53623709	0	26.93762324	0	0	0
F2S4_161004_013_D01	VISp	L1-L2/3	GABAergic	Lamp5	5	Lamp5 Plch2 Dock5	Core	2.904440987	26689.3923	0	15.00627843	0	0	0	0.484073498	0	65.83399571	131.6679914	0	83.26064163	0	0	0	0	0	0
F2S4_161004_017_B01	VISp	L1-L2/3	GABAergic	Lamp5	5	Lamp5 Plch2 Dock5	Core	0	23455.03169	0	0	0	0	0	1.132218174	0	0	130.7711991	0	219.6503257	0	0	0	0	0	0
F2S4_170320_005_F01	VISp	L1-L6	GABAergic	Lamp5	5	Lamp5 Plch2 Dock5	Core	0	389.7487502	0	779.9739659	0	0	0	0	0	28.58792789	38.59370265	0	1495.625094	0	0	0	0	0	0
F2S4_170707_004_C01	VISp	L1	GABAergic	Lamp5	5	Lamp5 Plch2 Dock5	Core	2.249432862	14709.60384	0	0	0.562358215	0	0	0	0	50.61223939	57.36053797	0	419.5192287	0	0	0	0	0	0
F2S4_170707_004_E01	VISp	L1	GABAergic	Lamp5	5	Lamp5 Plch2 Dock5	Intermediate	2.289441496	1923.130857	0	0	0	0	518.558499	0	0	6.295964115	0	0	398.3628204	0	0	76.12392976	0	0	0
F2S4_170707_005_E01	VISp	L2/3	GABAergic	Lamp5	5	Lamp5 Plch2 Dock5	Core	4.972848249	8421.24224	0	0	0	0	0.552538694	0	0	56.91148551	93.93157803	0	381.8042378	0	0	0	0	0	0
F2S4_170707_006_G01	VISp	L2/3	GABAergic	Lamp5	5	Lamp5 Plch2 Dock5	Core	0.996736187	3004.661237	0	0.498368094	0	0	0	0	0	31.895558	0	0	535.2473326	17.94125137	0	0	0	0	0
F2S4_170707_022_B01	VISp	L1	GABAergic	Lamp5	5	Lamp5 Plch2 Dock5	Core	2.775169119	9221.331948	1.110067648	395.1840825	0	0	0	0.555033824	0	63.82888973	0	0	516.7364899	1.110067648	0	0	0	0	0
F2S4_170707_022_E01	VISp	L1	GABAergic	Lamp5	5	Lamp5 Plch2 Dock5	Intermediate	1.19586756	10053.65858	0	0	0	0.59793378	0	0	0	85.50453054	0	0	621.2531975	0	0	0	0	0	0
F2S4_170807_006_F01	VISp	L1-L4	GABAergic	Lamp5	5	Lamp5 Plch2 Dock5	Intermediate	0	4396.150336	0	25.41795201	1304.403083	0	0	0	1.155361455	0	0	0	165.216688	0	0	301.5493397	0	0	0
F2S4_170807_006_H01	VISp	L1-L4	GABAergic	Lamp5	5	Lamp5 Plch2 Dock5	Core	0	5935.638888	5.24164508	0	0	0	0	0	0	0	0	0	157.2493524	0	0	0	0	0	0
F2S4_170807_007_D01	VISp	L1-L4	GABAergic	Lamp5	5	Lamp5 Plch2 Dock5	Core	2.180423504	11399.25408	1.090211752	1.090211752	0	0	0	0	0	9.811905766	11.99232927	0	370.6719956	0	0	0	0	0	0
F2S4_170807_008_B01	VISp	L1-L4	GABAergic	Lamp5	5	Lamp5 Plch2 Dock5	Core	1.617005726	3598.646243	0.808502863	88.93531492	0	0.808502863	0	0	0	35.57412597	0	0	443.8680717	0	0	0	0	0	0
F2S4_170807_009_F01	VISp	L1-L4	GABAergic	Lamp5	5	Lamp5 Plch2 Dock5	Core	1.08076795	1611.425014	0	2.161535901	1.08076795	0	0	0	0	0	71.33068473	0	555.5147265	7.565375653	0	0	0	0	0
F2S4_170807_010_C01	VISp	L1-L4	GABAergic	Lamp5	5	Lamp5 Plch2 Dock5	Core	4.440502265	12935.1831	4.440502265	0	0	0	0	0	1.110125566	72.15816181	0	0	341.9186744	12.21138123	0	0	0	0	0
F2S4_170807_011_C01	VISp	L1-L4	GABAergic	Lamp5	5	Lamp5 Plch2 Dock5	Core	0	47089.59318	3.609135444	0	67.37052828	0	0	0	0	60.15225739	7.218270887	0	115.4923342	0	0	0	0	0	0
F2S4_171003_007_B01	VISp	L1-L4	GABAergic	Lamp5	5	Lamp5 Plch2 Dock5	Intermediate	1.168867449	13814.84438	0	45.58583052	1.168867449	0	0	0	0	286.3725251	0	0	1022.759018	0	0	0	0	0	0
F2S4_171003_007_D01	VISp	L1-L4	GABAergic	Lamp5	5	Lamp5 Plch2 Dock5	Core	0	5492.2584	2.509026222	0	0	0	0	0	0	112.90618	0	0	341.2275662	0	0	0	0	0	0
F2S4_171122_007_B01	VISp	L1-L4	GABAergic	Lamp5	5	Lamp5 Plch2 Dock5	Core	0	740.7150861	0	1295.972096	0	0	0	0	0	197.7474664	0	0	622.2900497	0	0	65.91582214	0	0	0
F2S4_171122_007_C01	VISp	L1-L4	GABAergic	Lamp5	5	Lamp5 Plch2 Dock5	Core	0	3167.67252	0	0	0	0	0	0	0	0	0	0	92.90026703	0	0	0	0	0	0
F2S4_171122_007_D01	VISp	L1-L4	GABAergic	Lamp5	5	Lamp5 Plch2 Dock5	Core	0	2500.440678	0	0	0	0	0	0	0	13.05713148	0	0	466.7924504	0	0	0	0	0	0
F2S4_171122_007_F01	VISp	L1-L4	GABAergic	Lamp5	5	Lamp5 Plch2 Dock5	Intermediate	1.279741185	17495.34174	0	511.8964741	1154.326549	0	0	0	0	34.553012	0	0	163.8068717	0	0	0	0	0	0
F2S4_171122_007_G01	VISp	L1-L4	GABAergic	Lamp5	5	Lamp5 Plch2 Dock5	Core	0	6213.57394	0	1284.681035	0	0	0	0	0	79.22199717	0	0	593.0944112	0	0	0	0	0	0
F2S4_171122_007_H01	VISp	L1-L4	GABAergic	Lamp5	5	Lamp5 Plch2 Dock5	Core	0	14639.29573	0	0.981975834	0	0	0	0	0	23.56742001	0	0	118.8190759	0	0	0	0	0	0
F2S4_171122_008_A01	VISp	L1-L4	GABAergic	Lamp5	5	Lamp5 Plch2 Dock5	Core	1.165801448	30133.63582	0	629.5327818	50.12946225	0	0	0	0	62.95327818	0	0	141.0619752	0	0	0	0	0	0
F2S4_171122_008_B01	VISp	L1-L4	GABAergic	Lamp5	5	Lamp5 Plch2 Dock5	Core	0	20157.09578	0	161.9544161	0	0	0	0	0	401.1486306	0	0	728.7948723	0	0	0	0	0	0
F2S4_171122_008_D01	VISp	L1-L4	GABAergic	Lamp5	5	Lamp5 Plch2 Dock5	Core	0	21316.11569	0	138.6348372	0	0	0	0	0	358.027832	0	0	489.9328227	0	0	0	0	0	0
F2S4_171122_008_E01	VISp	L1-L4	GABAergic	Lamp5	5	Lamp5 Plch2 Dock5	Core	0	8699.503943	0	51.06091823	0	0	0	0	0	0	0	0	128.9288185	0	0	130.2053415	0	0	0
F2S4_171122_008_H01	VISp	L1-L4	GABAergic	Lamp5	5	Lamp5 Plch2 Dock5	Core	0	428.7795933	0	0	0	0	32.5361209	0	0	12.7820475	0	0	811.079014	0	0	32.5361209	0	0	0
F2S4_171122_009_A01	VISp	L1-L4	GABAergic	Lamp5	5	Lamp5 Plch2 Dock5	Intermediate	0	1834.065812	0	855.8336298	0	0	0	0	0	45.89945724	0	0	554.6184416	0	0	0	0	0	0
F2S4_171122_009_B01	VISp	L1-L4	GABAergic	Lamp5	5	Lamp5 Plch2 Dock5	Core	0	1322.675923	1.163303363	0	0	0	0	0	0	9.306426902	0	0	312.9286046	0	0	0	0	0	0
F2S4_171122_009_C01	VISp	L1-L4	GABAergic	Lamp5	5	Lamp5 Plch2 Dock5	Core	0	3165.578179	0	301.4273471	0	0	0	0	0	91.01923816	0	0	388.9003812	0	0	0	0	0	0
F2S4_171122_009_E01	VISp	L1-L4	GABAergic	Lamp5	5	Lamp5 Plch2 Dock5	Core	0	884.0026576	0	0	0	0	0	0	0	0	0	0	381.5519626	0	0	0	0	0	0
F2S4_171122_009_G01	VISp	L1-L4	GABAergic	Lamp5	5	Lamp5 Plch2 Dock5	Core	0.983907214	8241.206821	0	544.1006891	0	0	0	0	0	131.8435666	0	0	365.0295763	0	0	0	0	0	53.13098954
F2S4_171122_009_H01	VISp	L1-L4	GABAergic	Lamp5	5	Lamp5 Plch2 Dock5	Core	0	3392.993639	0	3.013315843	0	0	0	0	0	0	0	0	527.3302725	0	0	0	0	0	0
F2S4_171122_010_D01	VISp	L1-L4	GABAergic	Lamp5	5	Lamp5 Plch2 Dock5	Core	0	6092.950406	0	0	0	0	0	0	0	43.8827453	0	0	381.4423246	0	0	0	0	0	0
F2S4_171122_010_E01	VISp	L1-L4	GABAergic	Lamp5	5	Lamp5 Plch2 Dock5	Core	0	488.1865949	0	1.014940946	0	0	0	0	0	0	0	0	455.7084846	0	0	0	0	0	0
F2S4_171122_010_F01	VISp	L1-L4	GABAergic	Lamp5	5	Lamp5 Plch2 Dock5	Core	0	12489.80715	0	0	0	0	0	0	0	22.5962058	0	0	991.2857241	0	0	0	0	0	0
F2S4_171122_010_H01	VISp	L1-L4	GABAergic	Lamp5	5	Lamp5 Plch2 Dock5	Core	0	10921.02426	1.141053626	0	0	0	0	0	0	253.313905	0	0	0	0	0	0	0	0	0
F2S4_171122_011_D01	VISp	L1-L4	GABAergic	Lamp5	5	Lamp5 Plch2 Dock5	Core	0	1666.37031	0	0	0	0	0	0	0	0	0	0	609.6476744	0	0	0	0	0	0
F2S4_171122_011_G01	VISp	L1-L4	GABAergic	Lamp5	5	Lamp5 Plch2 Dock5	Core	0	9244.029491	0	0	0	0	0	0	0	22.89175422	0	0	529.0538753	0	0	0	0	0	0
F2S4_171122_011_H01	VISp	L1-L4	GABAergic	Lamp5	5	Lamp5 Plch2 Dock5	Core	0	3917.708277	0	0	0	0	0	0	0	0	0	0	980.7136125	0	0	0	0	0	0
F2S4_171122_012_A01	VISp	L1-L4	GABAergic	Lamp5	5	Lamp5 Plch2 Dock5	Core	0	4646.337685	0	460.3687717	0	0	0	0	0	82.79111426	0	0	534.3790102	0	0	0	0	0	0
F2S4_171122_012_B01	VISp	L1-L4	GABAergic	Lamp5	5	Lamp5 Plch2 Dock5	Core	0	670.6971921	0	125.2602321	0	0	0	0	0	30.12587861	0	0	280.6463428	6.342290233	0	104.6477888	0	0	0
F2S4_171122_012_C01	VISp	L1-L4	GABAergic	Lamp5	5	Lamp5 Plch2 Dock5	Core	0	1373.700636	0	0	0	0	0	0	0	19.65940088	0	0	321.9226894	0	0	0	0	0	0
F2S4_171122_012_F01	VISp	L1-L4	GABAergic	Lamp5	5	Lamp5 Plch2 Dock5	Core	0	1360.986354	0	0	0	0	0	0	0	0	0	0	351.3566812	0	0	0	0	0	0
F2S4_171122_012_G01	VISp	L1-L4	GABAergic	Lamp5	5	Lamp5 Plch2 Dock5	Core	0	3343.433059	0	0	0	0	0	0	0	0	0	0	678.5524798	0	0	0	0	0	0
F2S4_171122_013_A01	VISp	L1-L4	GABAergic	Lamp5	5	Lamp5 Plch2 Dock5	Core	0	1028.962295	0	0	0	0	0	0	0	0	0	0	150.2217182	0	0	0	0	0	0
F2S4_171122_013_B01	VISp	L1-L4	GABAergic	Lamp5	5	Lamp5 Plch2 Dock5	Core	0	3954.849618	0	0	0	0	0	0	0	0	0	0	199.3661064	0	0	72.49676596	0	0	0
F2S4_171122_013_D01	VISp	L1-L4	GABAergic	Lamp5	5	Lamp5 Plch2 Dock5	Core	0	3187.109195	0	0	0	0	0	0	0	165.8267474	0	0	788.6881891	0	0	0	0	0	0
F2S4_171122_013_G01	VISp	L1-L4	GABAergic	Lamp5	5	Lamp5 Plch2 Dock5	Core	0	33285.39117	0	456.0920956	0	0	0	0	0	256.6247085	0	0	243.7934731	0	0	0	0	0	0
FYS4_171003_504_B01	VISp	L1-L4	GABAergic	Lamp5	5	Lamp5 Plch2 Dock5	Core	0	1801.089304	0	210.0755963	1.029782335	1.029782335	0	0	0	12.35738802	0	0	431.4787983	0	0	0	0	0	0
FYS4_171003_504_C01	VISp	L1-L4	GABAergic	Lamp5	5	Lamp5 Plch2 Dock5	Core	0	13095.79733	0	0	0	0	0	0	0	216.0499333	0	0	1007.90267	19.8210948	0	0	0	0	0
FYS4_171003_504_G01	VISp	L1-L4	GABAergic	Lamp5	5	Lamp5 Plch2 Dock5	Core	0	26648.10041	1.970940454	0	0	0	0	0	0.985470227	30.54957704	0	0	399.1154419	0	0	0	0	0	0
F1S4_180124_316_B01	ALM	L1-L2/3	GABAergic	Lamp5	6	Lamp5 Lsp1	Core	0	72982.94668	0	515.6393974	0	0	0	0	0	201.5351166	0	0	1002.228688	30.86573858	0	0	0	0	0
F1S4_180124_317_B01	ALM	L5-L6	GABAergic	Lamp5	6	Lamp5 Lsp1	Core	0	55734.82061	0	746.2395507	0	0	0	0	0	13.00068904	0	0	470.6249431	0	0	0	0	0	0
F1S4_180124_317_D01	ALM	L5-L6	GABAergic	Lamp5	6	Lamp5 Lsp1	Core	0	40947.3612	0	745.437179	0	0	20.87224101	0	0	3.975664955	0	0	486.0250407	0	0	0	0	0	0
F2S4_160209_007_F01	ALM	L2/3	GABAergic	Lamp5	6	Lamp5 Lsp1	Core	2.347150067	36535.26851	0	1679.620588	0	0	0.469430013	0	0	46.94300134	0	0	465.2051433	0	28.63523082	0	0	0	0
F2S4_160209_007_G01	ALM	L2/3	GABAergic	Lamp5	6	Lamp5 Lsp1	Core	1.903537598	12251.16798	0	100.8874927	3.807075195	2.53805013	0	0	0	47.58843994	0	0	319.7943164	0	0	0	0	0	0
F2S4_160209_008_F01	ALM	L2/3	GABAergic	Lamp5	6	Lamp5 Lsp1	Core	4.986806335	44662.54994	0	1058.627745	0	0	10.68601358	0	0	15.67281991	0	0	531.4510752	0	0	0	0	0	0
F2S4_160209_011_F01	ALM	L2/3	GABAergic	Lamp5	6	Lamp5 Lsp1	Core	0	28169.80016	0	1570.236136	0	0	0	0	0	140.6021421	0	0	530.2096045	10.73298795	0	0	0	0	0
F2S4_160216_006_B01	ALM	L2/3	GABAergic	Lamp5	6	Lamp5 Lsp1	Core	0	53193.54313	0	0	0	0	0	0	0	261.2431988	0	0	489.7203015	1.771140331	0	0	0	0	0
F2S4_160225_002_B01	ALM	L6	GABAergic	Lamp5	6	Lamp5 Lsp1	Core	1.39454908	20402.71788	0.464849693	336.0863282	0	0	0	0	0	14.87519018	0	0	218.4793558	0	0	0	0	0	0
F2S4_160307_007_A01	ALM	L5	GABAergic	Lamp5	6	Lamp5 Lsp1	Core	0.434274885	19785.56375	0	1.737099539	0	0.434274885	39.51901451	0	0	16.06817073	17.37099539	0	144.1792617	12.15969677	0	0	0	0	0
F2S4_160307_007_D01	ALM	L5	GABAergic	Lamp5	6	Lamp5 Lsp1	Core	3.413948026	25039.35794	0	1.463120583	1.463120583	0	0.487706861	0	0	119.0004741	0	0	430.1574513	0	52.18463411	0	0	0	0
F2S4_160307_007_H01	ALM	L5	GABAergic	Lamp5	6	Lamp5 Lsp1	Core	3.761092873	49052.8001	0	0	0	0	0	0	0	105.3106005	0.626848812	0	173.637121	0	0	0	0	0	0
F2S4_160307_008_B01	ALM	L6	GABAergic	Lamp5	6	Lamp5 Lsp1	Core	1.291887014	55435.51772	0	182.8020125	0	0	1.291887014	0	0	0	0	0	209.2856963	0	0	0	0	0	0
F2S4_160307_009_D01	ALM	L2/3	GABAergic	Lamp5	6	Lamp5 Lsp1	Core	0.643865666	54977.11379	0	1057.227424	0.643865666	0	0	0	0	78.55161131	0	0	507.3661452	0	0	0	0	0	0
F2S4_160308_003_D01	ALM	L6	GABAergic	Lamp5	6	Lamp5 Lsp1	Core	0	57669.70866	0	1466.808978	0	0	0	0	0	43.69218233	0	0	275.7714365	0	3.404585636	0	0	0	0
F2S4_160308_003_E01	ALM	L6	GABAergic	Lamp5	6	Lamp5 Lsp1	Core	4.371704145	31339.65409	0	1047.569606	1.639389054	0.546463018	0	0	0	10.92926036	0	0	218.5852072	12.0221864	17.48681658	0	0	0	0
F2S4_160308_003_G01	ALM	L6	GABAergic	Lamp5	6	Lamp5 Lsp1	Core	2.616372316	31482.80808	0	897.4157044	0	0	0	0	0	8.372391411	0.523274463	0	396.6420431	0	17.79133175	0	0	0	0
F2S4_160308_003_H01	ALM	L6	GABAergic	Lamp5	6	Lamp5 Lsp1	Core	1.000028001	9989.779714	0	75.00210006	2.500070002	0	0	0	0	34.50096603	0	0	417.0116763	0	0	0	0	0	0
F2S4_160420_001_B01	ALM	L2/3	GABAergic	Lamp5	6	Lamp5 Lsp1	Core	0.522543575	26903.6785	0	0.522543575	0	0	0	0	0	10.97341507	0	0	228.8740858	7.838153624	29.78498377	0	0	0	0
F2S4_160420_006_C01	ALM	L2/3	GABAergic	Lamp5	6	Lamp5 Lsp1	Core	0	14383.56588	0	242.5517433	0	0	0	0	0	47.64409244	0	0	210.3765121	0	0	0	0	0	0
F2S4_160420_007_A01	ALM	L2/3	GABAergic	Lamp5	6	Lamp5 Lsp1	Core	0.451391256	19097.91263	0.902782511	1321.673596	0	0.902782511	0.902782511	0	0	49.20164686	0	0	688.3716647	0	9.479216367	0.451391256	0	0	0
F2S4_160420_007_F01	ALM	L2/3	GABAergic	Lamp5	6	Lamp5 Lsp1	Core	0	30212.12646	0.579564666	814.8679201	0	0	0	0	0	46.94473793	0	0	283.9866862	0	0	0	0	0	0
F2S4_160420_008_C01	ALM	L5	GABAergic	Lamp5	6	Lamp5 Lsp1	Core	2.204408155	15434.7148	0.551102039	1108.2662	0	0.551102039	0	0	0	24.79959174	0	0	266.7333868	0	0	0	0	0	0
F2S4_160420_009_B01	ALM	L5	GABAergic	Lamp5	6	Lamp5 Lsp1	Core	0	36843.96229	0.589041588	0.589041588	0	1.178083176	1.767124764	0	0	0	0	0	229.1371778	0	0	0	0	0	0
F2S4_160420_009_G01	ALM	L5	GABAergic	Lamp5	6	Lamp5 Lsp1	Core	4.00942329	32322.25224	0	1565.393407	0.572774756	0.572774756	0	0	0	26.92041352	0	0	343.6648535	0	0	0	0	0	0
F2S4_160420_012_C01	ALM	L5	GABAergic	Lamp5	6	Lamp5 Lsp1	Core	0	39491.83506	0.58254418	2.330176721	0	0	0	0	0	43.69081351	0	0	449.1415629	0	0	0	0	0	0
F2S4_160420_013_C01	ALM	L5	GABAergic	Lamp5	6	Lamp5 Lsp1	Core	0	28620.84459	1.119094608	1016.137904	0	0	0	0	0	107.4330823	0	0	421.3391198	0	0	0	0	0	0
F2S4_160420_016_C01	ALM	L6	GABAergic	Lamp5	6	Lamp5 Lsp1	Core	2.841288467	23155.28332	0	424.5696767	0	0.405898352	0	0	1.62359341	20.70081598	0	0	253.6864703	10.14745881	22.73030774	0	0	0	0
F2S4_160420_018_A01	ALM	L6	GABAergic	Lamp5	6	Lamp5 Lsp1	Core	0.532145868	20022.52041	0	207.5368884	0.532145868	0	0	0	0	91.52908922	0	0	234.6763276	13.83579256	0	0	0.532145868	0	0
F2S4_160420_019_G01	ALM	L6	GABAergic	Lamp5	6	Lamp5 Lsp1	Core	5.976297086	45563.7487	0	1.838860642	1.379145481	0.45971516	0.45971516	0	0	73.55442568	0	0	464.3123121	0	0	0	0	0	0
F2S4_160420_025_H01	ALM	L5	GABAergic	Lamp5	6	Lamp5 Lsp1	Core	3.290301671	23723.89763	0.411287709	324.0947146	0	0	7.814466469	0	0	39.07233235	0	0	382.908857	0	0	0	0	0	0
F2S4_160420_027_G01	ALM	L2/3	GABAergic	Lamp5	6	Lamp5 Lsp1	Core	0.945809379	31880.39673	0	1987.145505	0	0	0	0	0	98.83708008	0	0	870.1446284	0	59.58599086	0	0	0	0
F2S4_160420_031_D01	ALM	L2/3	GABAergic	Lamp5	6	Lamp5 Lsp1	Core	1.581830463	44408.30841	0	28.47294833	0	0	0	0	0	72.76420128	0	0	488.2583361	0	1.581830463	0	0	0	0
F2S4_160421_002_D01	ALM	L2/3	GABAergic	Lamp5	6	Lamp5 Lsp1	Core	0.548663428	2187.521089	1.097326857	922.3032232	0	0.548663428	0	0	0	13.71658571	0	0	467.461241	0	0	0	0	0	0
F2S4_160421_005_D01	ALM	L5	GABAergic	Lamp5	6	Lamp5 Lsp1	Core	11.38604494	33652.2691	1.084385232	1118.543367	1.626577848	0	0.542192616	0	0	89.46178166	0	0	720.5739868	0	24.94086034	0	0	0	0
F2S4_160421_008_F01	ALM	L5	GABAergic	Lamp5	6	Lamp5 Lsp1	Core	1.468722094	18524.99178	0	31.82231204	0	0	0.489574031	0	0	37.69720042	0	0	172.3300591	0	0	0	0	0	0
F2S4_160421_009_C01	ALM	L5	GABAergic	Lamp5	6	Lamp5 Lsp1	Core	2.154182372	44193.05136	2.692727965	9.693820674	0	0	0.538545593	0	0	254.1935199	0.538545593	0	557.3946888	0	0	0	0	0	0
F2S4_160421_013_D01	ALM	L2/3	GABAergic	Lamp5	6	Lamp5 Lsp1	Core	0.43191171	28878.48078	0	1107.853537	0	0	0	0	0	20.29985039	0	0	472.9433228	0	0	0	0	0	0
F2S4_160421_016_E01	ALM	L5	GABAergic	Lamp5	6	Lamp5 Lsp1	Core	0	50553.87254	2.857959417	58.30237211	0	0	0	0	1.143183767	297.7993712	0	0	146.899114	9.145470134	0	0	0	0	0
F2S4_160503_001_B01	ALM	L6	GABAergic	Lamp5	6	Lamp5 Lsp1	Core	7.061831039	22465.56769	0	518.3383982	0	0	0.470788736	0	0	10.82814093	0	0	399.6996368	0	31.54284531	0	0	0	0
F2S4_160503_002_A01	ALM	L1	GABAergic	Lamp5	6	Lamp5 Lsp1	Core	0.405874465	14268.11093	0	0	0	0	0	0.405874465	0	19.4819743	0	0	291.0119912	0	0	0	0	0	0
F2S4_160503_002_G01	ALM	L6	GABAergic	Lamp5	6	Lamp5 Lsp1	Core	3.882530167	16197.36121	0	375.4961319	0	0	0	0	0	6.655766001	0	0	138.6617917	0	0	0	0	0	0
F2S4_160503_003_A01	ALM	L1	GABAergic	Lamp5	6	Lamp5 Lsp1	Core	0.536169168	14742.50744	0	41.82119509	0	0	0	0	0	61.6594543	0	0	194.6294079	0	0	0	0	0	0
F2S4_160503_003_G01	ALM	L1	GABAergic	Lamp5	6	Lamp5 Lsp1	Core	4.807594718	14280.69302	0	0	0	0	0	0.534177191	0	59.29366818	28.31139111	0	389.9493493	0	31.51645426	0	0	0	0
F2S4_160503_004_F01	ALM	L5	GABAergic	Lamp5	6	Lamp5 Lsp1	Core	3.115347291	24989.23907	0.519224549	893.0662235	0	0	0	1.038449097	0	31.67269746	0	0	313.6116273	0	39.46106569	0	0	0	0
F2S4_160503_005_A01	ALM	L5	GABAergic	Lamp5	6	Lamp5 Lsp1	Core	1.651102276	24850.18999	0	931.772051	0	0	0	0	0	3.852571977	0	0	148.0488374	0	17.06139018	0	0	0	0
F2S4_160503_005_C01	ALM	L5	GABAergic	Lamp5	6	Lamp5 Lsp1	Core	0	42066.56911	0.502863809	1376.338246	0	0	0.502863809	0.502863809	0	0.502863809	0	0	323.3414294	0	94.53839617	0	0	0	0
F2S4_160503_006_G01	ALM	L2/3	GABAergic	Lamp5	6	Lamp5 Lsp1	Core	4.635008528	16357.9751	0	0	0.515000948	0.515000948	0.515000948	0.515000948	0	19.57003601	0	0	192.6103544	11.84502179	0	0	0	0	0
F2S4_160503_006_H01	ALM	L2/3	GABAergic	Lamp5	6	Lamp5 Lsp1	Core	4.872219942	37762.74969	0	559.6962658	0.609027493	1.827082478	0	0	0	109.0159212	0	0	442.1539597	0	0	0	0	0	0
F2S4_160503_007_E01	ALM	L2/3	GABAergic	Lamp5	6	Lamp5 Lsp1	Core	16.27928397	22134.68537	0	217.1999203	1.713608839	0.42840221	0	0	0	101.5313237	1.713608839	0	170.5040795	0	0	0	0	0	0
F2S4_160503_007_F01	ALM	L2/3	GABAergic	Lamp5	6	Lamp5 Lsp1	Core	9.013360451	27362.97174	0	843.5444987	1.060395347	0	11.13415115	0	0	27.57027903	0	0	390.7556854	0	0	0	0	0	0
F2S4_160503_008_A01	ALM	L2/3	GABAergic	Lamp5	6	Lamp5 Lsp1	Core	0.41005252	19716.14524	0	0	0	0	0	0	0	27.88357133	0	0	324.7615955	0	0	0	0	0	0
F2S4_160503_008_G01	ALM	L2/3	GABAergic	Lamp5	6	Lamp5 Lsp1	Core	5.997518873	34875.57224	0	334.0156664	1.384042817	0	0	0	0	104.7259065	0	0	603.4426681	0	0	0	0	0	0
F2S4_160503_009_A01	ALM	L2/3	GABAergic	Lamp5	6	Lamp5 Lsp1	Core	1.317658468	35738.1918	0	0.658829234	0	0.658829234	0	0	0	30.30614477	0	0	326.1204709	0	0	0	0	0	0
F2S4_160505_001_G01	ALM	L1	GABAergic	Lamp5	6	Lamp5 Lsp1	Core	0.731123488	37195.90746	0	383.8398313	0	0	0	0	0	62.1454965	0	0	173.2762667	0	0	0	0	0	0
F2S4_160505_002_E01	ALM	L1	GABAergic	Lamp5	6	Lamp5 Lsp1	Core	0.758930909	28118.01072	0.379465455	0	0	0	0	0	0	112.70124	30.73670182	0	465.6041128	0	0	0	0	0	0
F2S4_160505_005_F01	ALM	L1	GABAergic	Lamp5	6	Lamp5 Lsp1	Core	4.797688666	24204.81909	1.4393066	0	0.479768867	0	0.959537733	0	0	97.39307991	0	0	441.8671261	0	0	0	0	0	0
F2S4_160505_006_C01	ALM	L1	GABAergic	Lamp5	6	Lamp5 Lsp1	Core	0.634421959	39445.81973	1.903265877	584.3026243	0	0	0	0	0	139.572831	0	0	389.5350829	0	0	0	0	0	0
F2S4_160505_008_E01	ALM	L6	GABAergic	Lamp5	6	Lamp5 Lsp1	Core	3.20970468	29001.5159	2.2926462	1200.42955	0	0	2.2926462	0.45852924	0	13.7558772	0	0	127.0125995	10.08764328	21.09234504	0	0	0	0
F2S4_160505_009_D01	ALM	L6	GABAergic	Lamp5	6	Lamp5 Lsp1	Core	3.964410917	36180.91306	7.362477417	855.1800692	0	0	0	0	0	12.45957717	0	0	286.5702748	0	0	0	0	0	0
F2S4_160505_009_F01	ALM	L6	GABAergic	Lamp5	6	Lamp5 Lsp1	Core	3.217245909	23344.79592	1.838426234	611.2767227	0	0	0.459606558	0	0	9.192131168	0	0	346.0837385	0	15.16701643	0	0	0	0
F2S4_160505_010_B01	ALM	L2/3	GABAergic	Lamp5	6	Lamp5 Lsp1	Core	2.289297625	37785.31516	1.373578575	1.373578575	0	0.91571905	0	0	0	198.2531743	0	0	249.5334411	17.39866195	0	0.457859525	0	0	0
F2S4_160505_011_D01	ALM	L2/3	GABAergic	Lamp5	6	Lamp5 Lsp1	Core	3.129970225	26701.77599	0	346.9795564	0.894277207	0.447138604	0	0	0	45.60813756	0.447138604	0	439.9843859	0	0	0	0	0	0
F2S4_160505_011_F01	ALM	L2/3	GABAergic	Lamp5	6	Lamp5 Lsp1	Core	1.87861516	31232.44669	0.46965379	0.93930758	0	0	0.46965379	0	0	37.5723032	0	0	316.0770007	7.98411443	0	0	0	0	0
F2S4_160505_012_D01	ALM	L2/3	GABAergic	Lamp5	6	Lamp5 Lsp1	Core	2.545082316	39697.17593	0	837.3320818	0	0.509016463	0	0	0	68.20820606	0	0	511.052529	2.545082316	0	0	0	0	0
F2S4_160505_012_E01	ALM	L2/3	GABAergic	Lamp5	6	Lamp5 Lsp1	Core	0.979626224	15256.20899	0	685.7383565	0	0	0	0	0	20.08233758	0	0	536.8351705	0	0	0	0	0	0
F2S4_160505_012_G01	ALM	L2/3	GABAergic	Lamp5	6	Lamp5 Lsp1	Core	0.933430099	18055.3384	0	0	0	0	0	0	0	5.600580594	0	0	419.5768295	0	0	0	0	0	0
F2S4_160505_013_C01	ALM	L2/3	GABAergic	Lamp5	6	Lamp5 Lsp1	Core	0	16491.56638	0	1016.474595	0.458697922	0	0	0	0	21.55880232	0	0	427.0477651	0	0	0	0	0	0
F2S4_160505_013_H01	ALM	L2/3	GABAergic	Lamp5	6	Lamp5 Lsp1	Core	0	21051.51826	0	0	0	0	0.52359146	0	0	20.94365842	76.96794468	0	308.9189617	0	0	0	0	0	0
F2S4_160505_015_C01	ALM	L2/3	GABAergic	Lamp5	6	Lamp5 Lsp1	Core	1.484125974	11268.96852	0	289.4045649	0	0	0.371031494	0	0	21.14879513	0	0	127.6348338	0	0	0	0	0	0
F2S4_160505_015_D01	ALM	L2/3	GABAergic	Lamp5	6	Lamp5 Lsp1	Core	1.375004211	22025.50495	0	0	0	0	0	0	0	74.9377295	0	0	369.1886306	0	0	0	0	0	0
F2S4_160505_015_E01	ALM	L2/3	GABAergic	Lamp5	6	Lamp5 Lsp1	Core	0.851444262	38457.183	0	0.425722131	0	0	0	0	0	186.8920156	0	0	244.7902254	2.980054918	0	0	0	0	0
F2S4_160505_016_E01	ALM	L5	GABAergic	Lamp5	6	Lamp5 Lsp1	Core	71.83293488	37840.93707	1.306053361	1144.102745	0.979540021	0	0	0	0.32651334	24.48850053	0	0	462.6694033	0	67.91477479	0	0	0	0
F2S4_160505_019_B01	ALM	L2/3	GABAergic	Lamp5	6	Lamp5 Lsp1	Core	0	30130.75036	0	0	0	0	0.778693088	0	0	20.24602029	0	0	341.0675727	0	16.35255485	0	0	0	0
F2S4_160505_019_C01	ALM	L2/3	GABAergic	Lamp5	6	Lamp5 Lsp1	Core	0.43417269	31129.74773	0	11.72266264	0	0	0	0	0	53.40324093	0	0	330.4054174	0	0	0	0	0	0
F2S4_160505_020_A01	ALM	L2/3	GABAergic	Lamp5	6	Lamp5 Lsp1	Core	1.155782534	23186.15342	0.385260845	904.2072025	0.385260845	0.770521689	0	0	0	23.50091153	0	0	287.0193293	0	18.1072597	0	0	0	0
F2S4_160505_022_B01	ALM	L2/3	GABAergic	Lamp5	6	Lamp5 Lsp1	Core	0.371006991	42911.41058	0.742013982	295.6925717	0	0	0	0	0	58.99011155	0	0	299.0316347	0	0	0	0	0	0
F2S4_160505_023_C01	ALM	L2/3	GABAergic	Lamp5	6	Lamp5 Lsp1	Core	1.320508118	29930.30688	0	329.4667755	0	0	0	0	0	121.4867469	0	0	758.3017869	0	0	0	0	0	0
F2S4_160505_024_G01	ALM	L6	GABAergic	Lamp5	6	Lamp5 Lsp1	Core	0.657735063	23525.86773	0	647.8690371	1.315470126	0	0	0	0	9.866025945	0	3.288675315	299.9271887	0	61.16936086	0	0	0	0
F2S4_160505_029_D01	ALM	L5	GABAergic	Lamp5	6	Lamp5 Lsp1	Core	1.981829595	27410.18968	0.990914798	1710.814398	0	0	0.495457399	0	0	46.07753809	0	0	208.0921075	0	0	0	0	0	0
F2S4_160506_001_A01	ALM	L2/3	GABAergic	Lamp5	6	Lamp5 Lsp1	Core	1.388010458	13597.87579	0	0	0	0	0	0	0	37.47628237	0	0	210.9775896	0	0	0.462670153	0	0	0
F2S4_160506_001_G01	ALM	L2/3	GABAergic	Lamp5	6	Lamp5 Lsp1	Core	1.99965306	19028.19861	0.99982653	0	0	0	0	0	0	102.9821326	38.49332141	0	231.4598417	21.4962704	0	0	0	0	0
F2S4_160506_001_H01	ALM	L2/3	GABAergic	Lamp5	6	Lamp5 Lsp1	Core	2.742909305	37960.76762	1.097163722	223.8213993	0	0.548581861	0	0	0	0	0	0	470.1346549	15.36029211	0	0	0	0	0
F2S4_160506_004_C01	ALM	L2/3	GABAergic	Lamp5	6	Lamp5 Lsp1	Core	0.365241034	32955.69845	0	612.1439722	0.365241034	0	0	0	0	159.6103316	0	0	399.9389317	0	0	0	0	0	0
F2S4_160506_004_E01	ALM	L2/3	GABAergic	Lamp5	6	Lamp5 Lsp1	Core	1.904200438	30414.27023	0	0	0	0	0.380840088	0	0	41.13072945	0	0	530.891082	0	0	0	0	0	0
F2S4_160506_005_B01	ALM	L2/3	GABAergic	Lamp5	6	Lamp5 Lsp1	Core	0.557757769	40778.78602	0.557757769	8.366366537	0	0	0	0	0	42.94734822	0	0	365.3313388	9.481882076	0	0	0	0	0
F2S4_160506_005_D01	ALM	L2/3	GABAergic	Lamp5	6	Lamp5 Lsp1	Core	0	14370.69617	0.709068741	89.34266137	0	0	0	0	0	2.127206223	0	0	310.2175742	0	0	0	0	0	0
F2S4_160506_005_G01	ALM	L2/3	GABAergic	Lamp5	6	Lamp5 Lsp1	Core	0	32775.30619	0	432.409059	0	0	0.406399492	0	0	39.82715017	0	0	610.0056368	0	0	0	0	0	0
F2S4_160506_005_H01	ALM	L2/3	GABAergic	Lamp5	6	Lamp5 Lsp1	Core	0.657564657	26155.62057	0	325.4945051	0	0	0.328782328	0	0	33.53579749	0	0	397.497835	0	29.91919188	0	0	0	0
F2S4_160506_006_E01	ALM	L2/3	GABAergic	Lamp5	6	Lamp5 Lsp1	Core	17.73242889	14330.39754	0	269.4464195	0	0.432498266	0.432498266	0	0	68.33472598	0	0	537.5953442	24.65240114	0	0	0	0	0
F2S4_160506_006_H01	ALM	L2/3	GABAergic	Lamp5	6	Lamp5 Lsp1	Core	0.953959073	24125.62496	0.953959073	0	0	0	0	0	0	3.815836293	0	0	320.5302486	0	0	0	0	0	0
F2S4_160506_007_C01	ALM	L5	GABAergic	Lamp5	6	Lamp5 Lsp1	Core	0	45781.34891	2.032130008	981.5187936	0	0	0	0	0	113.7992804	0	0	231.6628209	0	1.016065004	0	0	0	0
F2S4_160506_008_C01	ALM	L5	GABAergic	Lamp5	6	Lamp5 Lsp1	Core	0.943851679	28282.51557	2.831555038	0	0	0	0	0	0	77.86776355	0	0	300.6167599	0	0	0	0	0	0
F2S4_160506_008_F01	ALM	L5	GABAergic	Lamp5	6	Lamp5 Lsp1	Core	4.374682835	47982.00742	0.486075871	506.4910572	0	0.972151741	0	0	0	185.6809826	0	0	312.0607089	0	109.8531468	0	0	0	0
F2S4_160506_009_F01	ALM	L5	GABAergic	Lamp5	6	Lamp5 Lsp1	Core	1.986765756	42121.42079	0.794706302	776.0307043	0	0.397353151	0.397353151	0	0	90.99387162	0	0	588.8773701	0	29.80148634	0	0	0	0
F2S4_160506_011_A01	ALM	L5	GABAergic	Lamp5	6	Lamp5 Lsp1	Core	1.421911298	28341.53598	0.355477824	713.0885158	0.355477824	0.710955649	0	0	0	31.63752637	0	0	249.9009106	0	0	0	0	0	0
F2S4_160506_011_D01	ALM	L5	GABAergic	Lamp5	6	Lamp5 Lsp1	Core	0.366180989	24865.52003	2.197085932	11.71779164	0	0	0	0	0	109.1219346	0	0	234.7220137	0	0	0	0	0	0
F2S4_160506_011_E01	ALM	L5	GABAergic	Lamp5	6	Lamp5 Lsp1	Core	5.02143255	28170.59528	5.380106304	0.717347507	0.358673754	0.717347507	0.717347507	0	0	40.53013415	0	0	280.8415491	0	0	0	0	0	0
F2S4_160506_012_A01	ALM	L6	GABAergic	Lamp5	6	Lamp5 Lsp1	Core	2.962312473	32172.03004	0	204.3995607	0	0.32914583	0	0	0	13.49497904	0	0	431.8393294	0	39.82664547	0	0	0	0
F2S4_160506_012_F01	ALM	L6	GABAergic	Lamp5	6	Lamp5 Lsp1	Core	0.382873018	26498.25869	0.382873018	417.7144625	0	0	9.188952429	0	0	11.48619054	0	0	394.3592084	0	0	0	0	0	0
F2S4_160506_012_H01	ALM	L6	GABAergic	Lamp5	6	Lamp5 Lsp1	Core	0.764826253	18258.31471	1.147239379	208.0327407	0	0	0	0	0	8.413088778	0	0	260.8057521	0	0	0	0	0	0
F2S4_160506_013_F01	ALM	L6	GABAergic	Lamp5	6	Lamp5 Lsp1	Core	0.724254823	22016.9845	0.362127412	374.0776162	0	0.362127412	0.362127412	0	0	74.96037421	0	0	745.6203406	0	20.64126246	0.362127412	0	0	0
F2S4_160506_015_F01	ALM	L6	GABAergic	Lamp5	6	Lamp5 Lsp1	Core	0	33115.33826	0	763.0570428	0	0	0	0	0	18.57490367	0	0	377.4420426	1.485992294	35.66381505	0	0	0	0
F2S4_160517_003_H01	ALM	L2/3	GABAergic	Lamp5	6	Lamp5 Lsp1	Core	2.865570705	24366.3059	0	10.38769381	0	0.358196338	0.358196338	0	0	233.1858161	0	0	265.7816829	0.358196338	0	0	0	0	0
F2S4_160517_004_B01	ALM	L2/3	GABAergic	Lamp5	6	Lamp5 Lsp1	Core	1.158308314	25889.34912	0.772205543	1097.304076	0	0.386102771	0	0	0	105.7921593	0	0	446.7209064	0	0	0	0	0	0
F2S4_160517_015_E01	ALM	L6	GABAergic	Lamp5	6	Lamp5 Lsp1	Core	4.04028977	35872.83502	0	778.8780834	0	0	0	0	0	20.20144885	0	0	793.2435581	0	0	0	0	0	0
F2S4_160517_019_A01	ALM	L2/3	GABAergic	Lamp5	6	Lamp5 Lsp1	Core	0	37922.20364	0	1041.132028	0	0	12.85348183	0	0	158.2307936	0	0	392.6960311	2.216117557	0	0	0	0	0
F2S4_160517_024_H01	ALM	L5	GABAergic	Lamp5	6	Lamp5 Lsp1	Core	1.516387601	26050.52806	3.032775202	0	1.516387601	0	0	0	0	30.83321455	0	0	464.0146058	0	0	0	0	0	0
F2S4_160517_033_H01	ALM	L6	GABAergic	Lamp5	6	Lamp5 Lsp1	Core	0	34490.73669	0	0.437361138	0	0	0	0	0	52.92069768	0	0	254.5441822	5.248333654	30.61527965	0	0	0	0
F2S4_160518_001_F01	ALM	L2/3	GABAergic	Lamp5	6	Lamp5 Lsp1	Core	0	14215.58394	0	0.349105696	0	0	0	0	0	110.6665056	16.05886201	0	593.4796831	47.82748034	0	0	0	0	0
F2S4_160518_002_D01	ALM	L2/3	GABAergic	Lamp5	6	Lamp5 Lsp1	Core	0	51578.65641	0.447991943	284.9228759	0	0	1.34397583	0	0	96.76625976	0	0	208.7642456	0	0	0	0.447991943	0	0
F2S4_160518_002_H01	ALM	L2/3	GABAergic	Lamp5	6	Lamp5 Lsp1	Core	0	31984.56092	0	0.460044026	0	0	0	0	0	79.58761653	0	0	190.4582269	27.14259755	0	0	0	0	0
F2S4_160518_004_H01	ALM	L2/3	GABAergic	Lamp5	6	Lamp5 Lsp1	Core	0	10687.70378	0	238.8995624	0.435948106	0	0	0	0	99.39616828	0	0	275.9551514	0	0	0	0	0	0
F2S4_160518_010_D01	ALM	L2/3	GABAergic	Lamp5	6	Lamp5 Lsp1	Core	0	53114.20481	0.463313022	444.7805008	0	0	0	0	0	158.9163664	0	0	287.2540734	0	0	0	0	0	0
F2S4_160518_022_B01	ALM	L6	GABAergic	Lamp5	6	Lamp5 Lsp1	Core	0.39699869	49832.06955	0	619.7149549	0	0	0	0	0	217.5552821	0	0	939.2989003	0	0	0	0	0	0
F2S4_160518_029_E01	ALM	L5	GABAergic	Lamp5	6	Lamp5 Lsp1	Core	7.094462772	33698.69817	0	0	1.013494682	0	0	0	0	25.33736704	1.013494682	0	563.503043	0	0	0	0	0	0
F2S4_160518_033_D01	ALM	L5	GABAergic	Lamp5	6	Lamp5 Lsp1	Core	0.627800382	34065.70433	1.255600764	0.627800382	0	0	0.627800382	0	0	89.77545464	0	0	244.842149	0	0	0	0	0	0
F2S4_160518_035_A01	ALM	L5	GABAergic	Lamp5	6	Lamp5 Lsp1	Core	0.52759312	21564.3136	0	244.2756146	0	0	0	0	0	25.85206289	0	0	340.8251556	0	0	0	0	0	0
F2S4_160523_001_A01	ALM	L1	GABAergic	Lamp5	6	Lamp5 Lsp1	Core	0.699787859	26429.23798	1.049681789	546.1844242	0	0	0.34989393	0	0	57.03271053	0	0	320.1529456	0	0	0	0	0	0
F2S4_160523_001_F01	ALM	L1	GABAergic	Lamp5	6	Lamp5 Lsp1	Core	1.160497142	12283.47541	0	950.8339913	0	0	0	0	0	31.33342282	0	0	415.4579767	5.415653327	0	0	0	0	0
F2S4_160523_001_G01	ALM	L2/3	GABAergic	Lamp5	6	Lamp5 Lsp1	Core	0.833705374	31640.78637	0.416852687	134.643418	0	0	0	0	0	22.51004511	0	0	367.2472174	0	32.5145096	0	0	0	0
F2S4_160523_003_F01	ALM	L2/3	GABAergic	Lamp5	6	Lamp5 Lsp1	Core	1.38115204	40507.11759	1.03586403	436.4440445	0.34528801	0	0	0	0	48.6856094	0	0	643.6168505	0	0	0.34528801	0	0	0
F2S4_160523_004_H01	ALM	L2/3	GABAergic	Lamp5	6	Lamp5 Lsp1	Core	0	38104.08603	1.028829871	0.68588658	0	0	0	0	0	113.8571724	0	0	345.3438932	0	0	0	0	0	0
F2S4_160523_005_G01	ALM	L2/3	GABAergic	Lamp5	6	Lamp5 Lsp1	Core	0.349342781	30691.8594	0	333.971699	0	0	0	0	0	69.5192135	0	0	413.971196	0	0	0	0	0	0
F2S4_160523_006_G01	ALM	L2/3	GABAergic	Lamp5	6	Lamp5 Lsp1	Core	1.06750188	32899.34044	0.80062641	1682.382963	0	0	0	0	0	127.0327237	0	0	484.6458536	10.14126786	0	0	0	0	0
F2S4_160523_007_A01	ALM	L2/3	GABAergic	Lamp5	6	Lamp5 Lsp1	Core	0.808272181	36670.90471	0.808272181	697.9430281	0	0	0.40413609	0	0	12.93235489	0	0	449.8034686	11.31581053	0	0	0	0	0
F2S4_160523_008_B01	ALM	L5	GABAergic	Lamp5	6	Lamp5 Lsp1	Core	0	33223.60424	0.323303176	983.4882602	0	0	0	0	0.323303176	79.85588438	0	0	345.9343979	21.98461594	0	0	0	0	0
F2S4_160523_008_F01	ALM	L5	GABAergic	Lamp5	6	Lamp5 Lsp1	Core	0.923984133	25238.9346	0.307994711	638.7810309	0	0	0	0	0	32.03144996	0	0	239.3118905	0	16.32371969	0	0	0	0
F2S4_160523_009_B01	ALM	L6	GABAergic	Lamp5	6	Lamp5 Lsp1	Core	0.639380466	23781.43674	0.639380466	0	0	0	0	0	0	41.24004005	0	0	327.6824888	0	0	0	0	0	0
F2S4_160523_011_E01	ALM	L5	GABAergic	Lamp5	6	Lamp5 Lsp1	Core	21.09076763	24523.09478	0	100.3764311	0	0	0.781139542	0	0	28.12102351	0	0	355.8090614	0	0	0	0	0	0
F2S4_160523_012_B01	ALM	L6	GABAergic	Lamp5	6	Lamp5 Lsp1	Core	1.276669085	56813.90208	0	7.660014511	0.425556362	0	0.425556362	0	0	481.7298015	0	0	710.2535678	25.10782534	33.19339622	0	0	0	0
F2S4_160523_012_E01	ALM	L6	GABAergic	Lamp5	6	Lamp5 Lsp1	Core	4.370797054	8795.500604	0	1918.779907	0.485644117	1.456932351	0	0	0	183.0878321	0	0	255.9344497	0	0	0	0	0	0
F2S4_160524_004_C01	ALM	L2/3	GABAergic	Lamp5	6	Lamp5 Lsp1	Core	0.698265021	31720.0851	0.34913251	0	0	0.34913251	0	0	0	132.670354	0	0	317.361452	0	0	0	0	0	0
F2S4_160524_004_G01	ALM	L2/3	GABAergic	Lamp5	6	Lamp5 Lsp1	Core	1.399089612	21988.09235	0	293.1092738	0.699544806	0	0	0	0	29.38088186	0	0	155.9984918	7.694992868	0	0	0	0	0
F2S4_160524_007_A01	ALM	L2/3	GABAergic	Lamp5	6	Lamp5 Lsp1	Core	0.755306405	27571.70501	0	652.584734	0.755306405	0	0	0	0	57.40328679	0	0	443.3648598	0	0	0	0	0	0
F2S4_160524_008_B01	ALM	L2/3	GABAergic	Lamp5	6	Lamp5 Lsp1	Core	4.905653766	42739.45722	1.401615362	143.6655746	0.700807681	0	0.700807681	0	0	304.8513412	0	0	754.0690646	10.51211521	0	0	0	0	0
F2S4_160524_009_F01	ALM	L6	GABAergic	Lamp5	6	Lamp5 Lsp1	Core	0.362915021	28196.68252	0.362915021	555.2599814	0.362915021	0	0	0	0	37.38024712	0	0	350.5759098	0	0	0	0	0	0
F2S4_160524_011_A01	ALM	L2/3	GABAergic	Lamp5	6	Lamp5 Lsp1	Core	0.985766031	42771.89522	1.478649047	0	0.492883016	0	0	0	0	48.30253554	0	0	535.7638381	13.80072444	0	0	0	0	0
F2S4_160524_011_G01	ALM	L2/3	GABAergic	Lamp5	6	Lamp5 Lsp1	Core	1.660662679	46002.43204	0	853.5806171	0	0	0	0	0	22.41894617	0.41516567	0	205.0918409	0	39.44073863	0	0	0	0
F2S4_160524_012_F01	ALM	L2/3	GABAergic	Lamp5	6	Lamp5 Lsp1	Core	0.887559128	50878.88324	0	953.6822831	0.443779564	0	0	0	0	223.6649003	0	0	168.6362343	0	0	0	0	0	0
F2S4_160524_013_D01	ALM	L2/3	GABAergic	Lamp5	6	Lamp5 Lsp1	Core	0	38915.02072	3.928869992	0.43654111	0	0	0	0	0	111.3179831	0	0	297.7210371	0	0	0	0	0	0
F2S4_160524_014_B01	ALM	L2/3	GABAergic	Lamp5	6	Lamp5 Lsp1	Core	4.075762308	43121.56521	1.528410865	1599.736706	0	0	0	0	0	56.04173173	0	0	492.1482986	0	0	0	0	0	0
F2S4_160524_016_A01	ALM	L2/3	GABAergic	Lamp5	6	Lamp5 Lsp1	Core	1.224334131	41100.89676	0.612167065	321.3877093	0	0	0	0.612167065	0	132.2280861	0	0	532.5853468	0	0	0	0	0	0
F2S4_160524_017_A01	ALM	L5	GABAergic	Lamp5	6	Lamp5 Lsp1	Core	1.444402075	42807.74431	2.166603113	224.6045227	0.722201038	0.722201038	0.722201038	0.722201038	0	103.2747484	0	0	301.1578327	0	0	0	0	0	0
F2S4_160524_017_F01	ALM	L5	GABAergic	Lamp5	6	Lamp5 Lsp1	Core	0.498230038	41149.81528	1.992920151	507.6964085	0.498230038	0	0.996460076	0	0	12.45575094	0	0	481.2902165	0	1.494690113	0	0	0	0
F2S4_160524_018_B01	ALM	L5	GABAergic	Lamp5	6	Lamp5 Lsp1	Core	3.486422129	38638.85432	1.16214071	990.1438846	0.581070355	0	1.16214071	0.581070355	0	63.91773903	0	0	477.0587613	0	0	0	0	0	0
F2S4_160524_018_F01	ALM	L5	GABAergic	Lamp5	6	Lamp5 Lsp1	Core	0	46626.51141	0.552139347	0	0	0	0.552139347	0	0	0	0	0	468.214166	0	0	0	0	0	0
F2S4_160524_019_A01	ALM	L5	GABAergic	Lamp5	6	Lamp5 Lsp1	Core	1.130095459	16572.28486	2.825238648	1300.739873	0	0	0.56504773	1.130095459	0	55.93972523	0	0	507.4128612	0	0	0	0	0	0
F2S4_160524_019_E01	ALM	L5	GABAergic	Lamp5	6	Lamp5 Lsp1	Core	10.24335946	47175.22291	1.707226576	179.827866	1.138151051	1.138151051	0	0	1.138151051	59.18385464	0	0	328.3565782	22.19394549	0	0	0	0	0
F2S4_160524_019_H01	ALM	L5	GABAergic	Lamp5	6	Lamp5 Lsp1	Core	9.558364215	29236.78711	3.373540311	110.2023168	0.562256719	1.686770156	0.562256719	0	0	45.5427942	0	0	254.1400368	14.61867468	0	0	0	0	0
F2S4_160525_001_D01	ALM	L1	GABAergic	Lamp5	6	Lamp5 Lsp1	Core	0	13953.15851	0	230.2859384	0	0	0	0	0	80.93382617	0	0	284.5199456	0	0	0	0	0	0
F2S4_160525_002_F01	ALM	L1	GABAergic	Lamp5	6	Lamp5 Lsp1	Core	0	31500.91172	2.658080476	0	0	0	0	0	0	46.95942174	0	0	148.8525067	0	0	0	0	0	0
F2S4_160525_002_G01	ALM	L1	GABAergic	Lamp5	6	Lamp5 Lsp1	Core	0.902403688	21133.84316	0	84.37474479	0	0	0	0	0	43.315377	0	0	182.7367467	0	0	0	0	0	0
F2S4_160525_003_B01	ALM	L2/3	GABAergic	Lamp5	6	Lamp5 Lsp1	Core	2.587995067	38244.74411	0	938.1482119	0	0	0	0	0	240.0365425	0	0	458.0751269	0	16.17496917	0	0	0	0
F2S4_160525_003_D01	ALM	L2/3	GABAergic	Lamp5	6	Lamp5 Lsp1	Core	0.453162485	31886.77826	1.81264994	0	0	0	0	0	0	53.92633572	61.63009796	0	275.0696284	0.453162485	0	0	0	0	0
F2S4_160525_003_E01	ALM	L2/3	GABAergic	Lamp5	6	Lamp5 Lsp1	Core	11.7565541	35933.17281	1.469569262	690.6975531	1.469569262	2.204353893	0	0	0	184.4309424	0	0	507.73618	0	0	0	0	0	0
F2S4_160525_003_F01	ALM	L2/3	GABAergic	Lamp5	6	Lamp5 Lsp1	Core	0.687768789	26311.28278	1.375537577	59.83588461	0.687768789	0	0	0	0	40.57835853	0	0	227.651469	0	0	0	0	0	0
F2S4_160525_004_B01	ALM	L2/3	GABAergic	Lamp5	6	Lamp5 Lsp1	Core	33.80032869	12624.79832	0	103.6543413	4.506710492	4.506710492	0.751118415	0	0	12.76901306	0	0	208.8109195	0	0	0	0	0	0
F2S4_160525_004_D01	ALM	L2/3	GABAergic	Lamp5	6	Lamp5 Lsp1	Core	0.833308334	64877.22035	2.499925002	609.1483922	0	0	0	0	0	102.4969251	0	0	131.6627168	25.83255836	0	0	0	0	0
F2S4_160525_004_H01	ALM	L2/3	GABAergic	Lamp5	6	Lamp5 Lsp1	Core	0	23776.75949	2.364435113	379.0977631	0	0	0	0	0	89.06038925	0	0	286.8847937	0	0	0	0	0	0
F2S4_160525_005_C01	ALM	L2/3	GABAergic	Lamp5	6	Lamp5 Lsp1	Core	0	24456.35199	0.507856799	0	0	0	0	0	0	89.89065335	0.507856799	0	296.5883704	0	0	0	0	0	0
F2S4_160525_006_C01	ALM	L2/3	GABAergic	Lamp5	6	Lamp5 Lsp1	Core	1.551486065	31506.54469	1.034324043	1312.040049	0	0	0	0	0	65.16241473	0.517162022	0	327.8807218	27.40958715	0	0	0	0	0
F2S4_160525_007_A01	ALM	L2/3	GABAergic	Lamp5	6	Lamp5 Lsp1	Core	2.031396245	21227.07506	0	1.015698122	0.507849061	1.015698122	0	0	0	20.31396245	14.21977371	0	323.499852	0	52.81630236	0	0	0	0
F2S4_160525_009_B01	ALM	L2/3	GABAergic	Lamp5	6	Lamp5 Lsp1	Core	2.583260643	58817.4005	3.444347524	875.7253581	0	0.861086881	25.83260643	0	0	42.19325717	0	0	311.713451	0	70.60912425	0	0	0	0
F2S4_160525_009_C01	ALM	L2/3	GABAergic	Lamp5	6	Lamp5 Lsp1	Core	7.1881123	45852.36935	1.198018717	31.14848663	1.198018717	0	0.599009358	0	0	40.73263637	0.599009358	0	194.6780415	0	0	0	0	0	0
F2S4_160525_009_H01	ALM	L2/3	GABAergic	Lamp5	6	Lamp5 Lsp1	Core	4.781689	64623.92913	0.597711125	273.1539841	1.19542225	1.19542225	0	0	0	209.7966049	0	0	527.1812123	0	0	0	0	0	0
F2S4_160525_011_C01	ALM	L5	GABAergic	Lamp5	6	Lamp5 Lsp1	Core	6.106450702	97318.50484	1.526612675	100.7564366	2.289919013	0	1.526612675	0	0	254.1810105	0	0	351.8842217	74.8040211	0	0	0	0	0
F2S4_160525_013_A01	ALM	L5	GABAergic	Lamp5	6	Lamp5 Lsp1	Core	1.295176289	33153.05918	0.863450859	0	0	0	0	0	0	36.26493608	0	0	248.6738474	0	0	0	0	0	0
F2S4_160525_017_B01	ALM	L2/3	GABAergic	Lamp5	6	Lamp5 Lsp1	Core	7.822333473	21559.77329	0.711121225	1142.771808	0	0.711121225	0.711121225	0.711121225	0	257.4258834	0	0	200.5361854	0	0	0	0	0	0
F2S4_160525_019_D01	ALM	L2/3	GABAergic	Lamp5	6	Lamp5 Lsp1	Core	1.119020096	51103.40977	2.797550241	1172.733061	0	0	0.559510048	0	0	315.5636672	0	0	359.764961	0	0	0	0	0	0
F2S4_160525_021_C01	ALM	L2/3	GABAergic	Lamp5	6	Lamp5 Lsp1	Core	3.480896261	25846.23489	0	37.12956012	0	1.160298754	0	0	0	13.92358504	0	0	127.6328629	0	0	0	0	0	0
F2S4_160525_022_F01	ALM	L1	GABAergic	Lamp5	6	Lamp5 Lsp1	Intermediate	5.477992507	14428.34752	0	143.1125543	0	0	0	0	0	105.4513558	0	0	739.5289885	0	0	0	0	0	0
F2S4_160526_001_E01	ALM	L6	GABAergic	Lamp5	6	Lamp5 Lsp1	Core	3.355317051	29119.83802	1.917324029	163.9312045	8.627958131	0.479331007	0	0	0	34.03250152	0	0	265.549378	2.875986044	0	0	0	0	0
F2S4_160526_002_A01	ALM	L6	GABAergic	Lamp5	6	Lamp5 Lsp1	Core	3.038045443	21009.60326	0	298.2347943	0.506340907	0.506340907	0	0	0	22.78534082	0	0	263.2972717	8.101454515	0	0	0	0	0
F2S4_160526_003_C01	ALM	L6	GABAergic	Lamp5	6	Lamp5 Lsp1	Core	0.512167565	23717.45559	0	3772.114115	0	0	0	0	0	11.26768643	0	0	538.2881106	0	0	0	0	0	0
F2S4_160526_003_D01	ALM	L6	GABAergic	Lamp5	6	Lamp5 Lsp1	Core	1.035602995	17151.13901	4.660213479	164.6608763	0	0.517801498	0	0	0	2.071205991	0	0	131.0037789	0	25.89007488	0	0	0	0
F2S4_160526_005_F01	ALM	L6	GABAergic	Lamp5	6	Lamp5 Lsp1	Core	8.40241519	33756.98311	0	567.4431058	1.120322025	1.680483038	0	0	0	25.76740658	1.120322025	0	463.2531575	0	20.16579646	0	0	0	0
F2S4_160526_006_F01	ALM	L6	GABAergic	Lamp5	6	Lamp5 Lsp1	Core	6.763466908	28580.72029	1.127244485	342.6823233	2.254488969	1.127244485	0	0	0	0	0	0	365.7908353	0	27.05386763	0	0	0	0
F2S4_160526_007_C01	ALM	L1	GABAergic	Lamp5	6	Lamp5 Lsp1	Core	1.132632385	14465.98082	23.78528008	1486.013689	0.566316192	0	0	0	0	22.6526477	0	0	730.5478883	0.566316192	0	0	0	0	0
F2S4_160526_008_B01	ALM	L1	GABAergic	Lamp5	6	Lamp5 Lsp1	Core	0	21444.38245	0	1490.65051	0.723616752	0	0	0	0	8.683401028	0	0	358.1902924	0	0	0	0	0	0
F2S4_160526_010_A01	ALM	L6	GABAergic	Lamp5	6	Lamp5 Lsp1	Core	0.452075683	29153.45664	0.452075683	1157.313748	0	0	0	0	0	82.27777429	0	0	311.0280698	0	75.94871473	0	0	0	0
F2S4_160526_011_F01	ALM	L6	GABAergic	Lamp5	6	Lamp5 Lsp1	Core	0	26723.25957	0.394613993	66.68976474	0	0	0	0	0	18.54685765	0	0	225.7192037	11.44380578	0	0	0	0	0
F2S4_160526_012_C01	ALM	L6	GABAergic	Lamp5	6	Lamp5 Lsp1	Core	1.654001609	21641.50838	2.756669348	0	0.55133387	0	0	0	0	18.1940177	0	0	363.8803539	0	0	0	0	0	0
F2S4_160526_012_G01	ALM	L5	GABAergic	Lamp5	6	Lamp5 Lsp1	Core	2.802828054	49517.56322	0	598.4037894	0	0.700707013	0	0	0	39.23959275	0	0	318.8216911	0	122.6237273	0	0	0	0
F2S4_160526_013_A01	ALM	L5	GABAergic	Lamp5	6	Lamp5 Lsp1	Core	4.706971417	35225.40509	0	887.2641121	0	1.568990472	0	0	0	10.19843807	0.784495236	0	240.8400375	0	83.15649503	0	0	0	0
F2S4_160526_013_D01	ALM	L5	GABAergic	Lamp5	6	Lamp5 Lsp1	Core	0	24759.38253	0.683620921	670.6321238	0	0	0	0	0	93.65606621	0	0	274.1319894	0	0	0	0	0	0
F2S4_160526_013_E01	ALM	L5	GABAergic	Lamp5	6	Lamp5 Lsp1	Core	2.176856532	41597.55147	3.62809422	707.4783729	0	0	0	0	0	45.71398717	0	0	206.0757517	0	0	0	0	0	0
F2S4_160526_013_G01	ALM	L5	GABAergic	Lamp5	6	Lamp5 Lsp1	Core	0.980026569	30340.15252	0	648.2875751	0	0.490013284	0.490013284	0	0	49.98135499	0	0	236.6764163	0	0	0	0	0	0
F2S4_160526_014_G01	ALM	L5	GABAergic	Lamp5	6	Lamp5 Lsp1	Core	1.517146793	39493.60674	0	0	0	1.517146793	0	0	0	60.68587172	0	0	637.2016531	0	0	0	0	0	0
F2S4_160526_014_H01	ALM	L5	GABAergic	Lamp5	6	Lamp5 Lsp1	Core	1.517237717	39113.25042	1.896547146	806.0325372	0.758618859	0.758618859	0	0	0	17.06892432	0	0	644.0674109	48.93091637	37.17232407	0	0	0	0
F2S4_160526_015_B01	ALM	L5	GABAergic	Lamp5	6	Lamp5 Lsp1	Core	2.184358392	31560.33817	0	909.4212106	0	0.728119464	0	0	7.28119464	33.49349534	0	0	346.5848649	0	0	0	0	0	0
F2S4_160526_015_E01	ALM	L1	GABAergic	Lamp5	6	Lamp5 Lsp1	Core	2.065433981	7025.057329	0.516358495	180.2091149	0	0	0	0	0	11.3598869	0	0	348.0256258	0	0	0	0	0	0
F2S4_160526_015_F01	ALM	L1	GABAergic	Lamp5	6	Lamp5 Lsp1	Intermediate	0.664842339	6082.642562	0	15.95621614	0	1.329684679	0.664842339	0	0	23.93432421	17.95074316	0	254.6346159	5.983581054	0	0	0	0	0
F2S4_160526_016_D01	ALM	L2/3	GABAergic	Lamp5	6	Lamp5 Lsp1	Core	0	19578.9342	0	699.5616992	0	0	0	0	0	48.85207397	0	0	439.0173047	0	0	0	0	0	0
F2S4_160526_016_G01	ALM	L2/3	GABAergic	Lamp5	6	Lamp5 Lsp1	Core	0	28960.77975	0	1018.829288	0	0	0	0	0	31.63619526	0	0	460.8818446	7.909048815	18.69411538	0	0	0	0
F2S4_160526_018_A01	ALM	L2/3	GABAergic	Lamp5	6	Lamp5 Lsp1	Core	1.932069406	23791.98568	0.483017351	218.8068602	0.483017351	0.966034703	0.966034703	0.483017351	0	122.2033899	0	0.483017351	351.1536145	0	0	0	0	0	0
F2S4_160526_019_D01	ALM	L2/3	GABAergic	Lamp5	6	Lamp5 Lsp1	Core	4.447018225	31508.60646	0.494113136	1697.772736	0.494113136	0.494113136	0	0	0	71.64640473	0.494113136	0	255.9506045	0	46.44663479	0	0	0	0
F2S4_160526_019_E01	ALM	L2/3	GABAergic	Lamp5	6	Lamp5 Lsp1	Core	7.147397199	16964.85778	0.510528371	0	1.021056743	1.021056743	1.021056743	0	0.510528371	40.84226971	0	0	55.64759248	16.33690788	0	0	0	0	0
F2S4_160526_020_B01	ALM	L2/3	GABAergic	Lamp5	6	Lamp5 Lsp1	Core	0	24665.41239	0	1065.476977	0	0	0	0	0	59.72745048	0	0	278.390659	0	21.25892305	0	0	0	0
F2S4_160526_020_H01	ALM	L2/3	GABAergic	Lamp5	6	Lamp5 Lsp1	Core	1.411318065	33297.93277	0.705659033	0	0	0	0	0	0	32.4603155	0	0	436.8029412	21.87543001	0	0	0	0	0
F2S4_160526_021_A01	ALM	L2/3	GABAergic	Lamp5	6	Lamp5 Lsp1	Core	5.038251525	25842.31168	0	13.4353374	0	0	0.559805725	0	0	61.57862975	0	0	134.9131797	0	0	0	0	0	0
F2S4_160526_021_B01	ALM	L2/3	GABAergic	Lamp5	6	Lamp5 Lsp1	Core	0.584276307	23286.3322	0	95.23703798	0.584276307	0	0.584276307	0	0	60.18045958	0	0	319.0148634	4.674210453	0	0	0	0	0
F2S4_160526_022_G01	ALM	L2/3	GABAergic	Lamp5	6	Lamp5 Lsp1	Core	4.247208787	48284.3931	0	1431.309361	0.530901098	0	1.061802197	0	0	113.081934	0	0	347.2093184	0	0	0	0	0	0
F2S4_160531_001_B01	ALM	L2/3	GABAergic	Lamp5	6	Lamp5 Lsp1	Core	1.616463791	43792.1594	1.616463791	68.96912177	0	0	0.538821264	0	0	66.27501545	0	0	294.19641	0	0	0	0	0	0
F2S4_160531_001_C01	ALM	L2/3	GABAergic	Lamp5	6	Lamp5 Lsp1	Core	0.542969227	51255.75208	0.542969227	103.1641532	0	0	0	0	0	232.9337985	77.64459949	0	254.1095983	0	0	0	0	0	0
F2S4_160531_002_A01	ALM	L2/3	GABAergic	Lamp5	6	Lamp5 Lsp1	Core	5.199715287	23916.95708	0.577746143	0.577746143	0	0	0	1.155492286	0	12.71041515	0	0	432.1541149	0	0	0	0	0	0
F2S4_160531_005_E01	ALM	L2/3	GABAergic	Lamp5	6	Lamp5 Lsp1	Core	7.573347874	34812.51636	0	1.081906839	1.081906839	0.54095342	8.655254713	0.54095342	0	8.655254713	0	1.081906839	184.4651161	0	0	0	0	0	0
F2S4_160531_005_H01	ALM	L2/3	GABAergic	Lamp5	6	Lamp5 Lsp1	Core	2.928443483	21117.00596	0	1295.348168	0	0	0.488073914	1.464221742	0	28.30828701	0	0.488073914	463.6702182	0	0	0	0	0	0
F2S4_160531_006_D01	ALM	L2/3	GABAergic	Lamp5	6	Lamp5 Lsp1	Core	1.861078839	38349.39057	0.46526971	0	0	0.46526971	1.861078839	0	0	35.82576766	0	0.46526971	503.4218261	0	0	0	0	0	0
F2S4_160531_008_F01	ALM	L1	GABAergic	Lamp5	6	Lamp5 Lsp1	Core	2.28304508	33973.99383	0.57076127	1206.589325	0	1.14152254	0	0	0	24.54273461	0	0	432.6370426	9.702941589	0	0	0	0	0
F2S4_160531_009_E01	ALM	L1	GABAergic	Lamp5	6	Lamp5 Lsp1	Intermediate	5.716046257	3800.599156	0	1453.018958	1.143209251	0	0	0	0	0	0	0	489.8651642	0	0	0	0	0	0
F2S4_160531_010_C01	ALM	L1	GABAergic	Lamp5	6	Lamp5 Lsp1	Core	0.606504273	18562.66978	0	915.2149481	0	0.606504273	0	0	0	224.4065811	0	0	391.8017604	3.639025639	0	0	0	0	0
F2S4_160531_010_F01	ALM	L1	GABAergic	Lamp5	6	Lamp5 Lsp1	Core	3.340550779	26623.07619	1.670275389	1184.225251	0	0	0	0	0	52.33529554	0	0	353.5416241	0	0.556758463	0	0	0	0
F2S4_160531_011_D01	ALM	L1	GABAergic	Lamp5	6	Lamp5 Lsp1	Intermediate	5.744627194	10260.47863	0.574462719	0	0.574462719	2.297850878	1.148925439	0	0	26.42528509	0	0	564.6968532	0	0	0	0	0	0
F2S4_160531_011_F01	ALM	L1	GABAergic	Lamp5	6	Lamp5 Lsp1	Core	0.574277645	35281.89567	0	1214.022941	0.574277645	0	0.574277645	0	0	52.83354333	0	0	371.5576362	0	0	0	0	0	0
F2S4_160531_012_A01	ALM	L6	GABAergic	Lamp5	6	Lamp5 Lsp1	Core	1.17649135	21166.84412	0	970.0171179	0	1.764737025	0	0	0	73.53070937	0	0	358.8298617	0	6.470702424	0	0	0	0
F2S4_160531_014_D01	ALM	L6	GABAergic	Lamp5	6	Lamp5 Lsp1	Core	5.509329223	41813.05414	1.652798767	1332.706739	0.550932922	0.550932922	0.550932922	0	0	185.1134619	0	0	301.3603085	0	20.38451812	0	0	0	0
F2S4_160531_019_B01	ALM	L1	GABAergic	Lamp5	6	Lamp5 Lsp1	Core	2.655326652	21529.38849	1.327663326	836.4278953	0	0	0	0	0	34.51924647	0	0	365.1074146	0	0	0	0	0	0
F2S4_160531_020_G01	ALM	L1	GABAergic	Lamp5	6	Lamp5 Lsp1	Core	0.623101488	20219.02017	1.246202975	53.58672794	0	0	0	0	0	42.99400265	0	0	259.2102189	0	0	0	0	0	0
F2S4_160531_021_C01	ALM	L2/3	GABAergic	Lamp5	6	Lamp5 Lsp1	Core	0	27326.00299	0.986587345	1197.717037	0	0	0	0	0	13.81222283	0	0	483.4277991	0	0	0	0	0	0
F2S4_160531_021_F01	ALM	L2/3	GABAergic	Lamp5	6	Lamp5 Lsp1	Core	2.361942958	25099.18684	1.180971479	916.4338677	1.771457218	0	0	0	0	40.74351602	0	0	344.8436719	0	0	0	0	0	0
F2S4_160531_021_G01	ALM	L2/3	GABAergic	Lamp5	6	Lamp5 Lsp1	Core	35.17743312	35798.90111	0	973.8594643	3.085739747	3.702887697	1.851443848	0	0	119.1095543	0	0	490.0154719	0	0	0	0	0	0
F2S4_160531_022_B01	ALM	L2/3	GABAergic	Lamp5	6	Lamp5 Lsp1	Core	2.623309998	33246.78159	0.524662	1732.433923	0.524662	0	0.524662	0	0	176.8110939	0	0	451.2093197	0	0	0	0	0	0
F2S4_160531_023_D01	ALM	L2/3	GABAergic	Lamp5	6	Lamp5 Lsp1	Core	7.119337902	48149.86206	3.559668951	1088.368782	1.779834475	0.889917238	1.779834475	0	0	304.3516953	0	0.889917238	355.9668951	0	0	0	0	0	14.2386758
F2S4_160531_023_G01	ALM	L2/3	GABAergic	Lamp5	6	Lamp5 Lsp1	Core	5.185770505	34639.65053	0	2.592885253	0	1.296442626	0	0	0	112.7905085	0	0	641.0908787	0	0	0	0	0	0
F2S4_160531_026_H01	ALM	L2/3	GABAergic	Lamp5	6	Lamp5 Lsp1	Core	12.86551965	29132.79965	0	0.584796348	1.169592695	0.584796348	0	0	0	13.45031599	0	0	225.1465938	0	0	0	0	0	0
F2S4_160531_027_D01	ALM	L2/3	GABAergic	Lamp5	6	Lamp5 Lsp1	Core	6.444499966	36429.76685	0	0	0	1.4871923	0	0.991461533	0	175.9844222	0	0	422.8583439	31.2310383	0	0	0	0	0
F2S4_160531_027_H01	ALM	L2/3	GABAergic	Lamp5	6	Lamp5 Lsp1	Core	9.464036472	32709.60285	4.921298966	271.8071275	1.135684377	1.135684377	0	0	0	55.269973	0.378561459	0	158.2386898	0	0	0	0	0	0
F2S4_160601_001_G01	ALM	L1	GABAergic	Lamp5	6	Lamp5 Lsp1	Core	2.980186232	13541.96624	0.496697705	0.496697705	0	1.986790821	0	0	0	104.3065181	0	0	447.0279348	18.3778151	16.39102428	0	0	0	0
F2S4_160601_004_C01	ALM	L5	GABAergic	Lamp5	6	Lamp5 Lsp1	Core	1.761273471	30743.02844	1.761273471	374.5641582	0	0.587091157	0	0	0	17.02564355	0	0	276.519935	0	10.56764083	0	0	0	0
F2S4_160601_004_D01	ALM	L5	GABAergic	Lamp5	6	Lamp5 Lsp1	Core	0.594963279	26292.02226	1.784889837	1125.670524	0	1.784889837	0	0	0	97.57397773	0	0	525.3525752	0	0	0	0	0	0
F2S4_160601_005_A01	ALM	L5	GABAergic	Lamp5	6	Lamp5 Lsp1	Core	9.036443979	37962.66593	0	544.4457497	0	0.564777749	0	0	0	107.87255	0	0	392.5205353	0	0	0	0	0	0
F2S4_160601_006_E01	ALM	L2/3	GABAergic	Lamp5	6	Lamp5 Lsp1	Core	7.300751539	31330.93187	0	25.309272	0	0	0.973433539	0	0	158.6696668	0	0	170.3508693	42.8310757	0	0	0	0	0
F2S4_160601_006_G01	ALM	L2/3	GABAergic	Lamp5	6	Lamp5 Lsp1	Core	0.488594972	36020.19852	0.488594972	0	0.488594972	0.488594972	29.31569831	0	0	167.5880754	0	0	402.6022568	0	0	0	0	0	0
F2S4_160601_006_H01	ALM	L2/3	GABAergic	Lamp5	6	Lamp5 Lsp1	Core	12.35002134	24148.73773	0.494000854	97.81216902	1.976003415	1.482002561	0	0	0	82.0041417	0	0	332.9565753	0	9.386016219	0	0	0	0
F2S4_160601_007_C01	ALM	L2/3	GABAergic	Lamp5	6	Lamp5 Lsp1	Core	2.955510697	34369.0428	1.773306418	686.269584	0	0	20.09747274	0	0	105.807283	0	0	558.0004197	0	0	0	0	0	0
F2S4_160601_007_E01	ALM	L2/3	GABAergic	Lamp5	6	Lamp5 Lsp1	Core	4.758610557	29831.13476	0	15.46548431	0	1.189652639	0	0	0	174.2841117	0.59482632	0	362.2492287	0	0	0	0	0	0
F2S4_160601_008_A01	ALM	L2/3	GABAergic	Lamp5	6	Lamp5 Lsp1	Core	4.914750915	30243.1928	1.09216687	1366.846838	0.546083435	0	1.09216687	0	0	20.75117053	0	0	309.6293076	0	27.30417175	0	0	0	0
F2S4_160601_008_E01	ALM	L2/3	GABAergic	Lamp5	6	Lamp5 Lsp1	Core	2.006826219	22427.78812	2.006826219	1.00341311	1.00341311	0	0	0.501706555	1.00341311	167.0682828	70.23891768	0	578.4676577	0	0	0	0	0	0
F2S4_160601_008_H01	ALM	L2/3	GABAergic	Lamp5	6	Lamp5 Lsp1	Core	2.077071827	12799.43587	2.596339784	0	0.519267957	0	0	0	0	164.0886744	0	0	372.315125	0	0	0	0	0	0
F2S4_160601_009_H01	ALM	L2/3	GABAergic	Lamp5	6	Lamp5 Lsp1	Core	4.865526576	32696.33859	0	518.1785804	1.459657973	0.973105315	0	0	0	83.20050446	0.486552658	0	429.6259967	0	0	0	0	0	0
F2S4_160601_010_C01	ALM	L2/3	GABAergic	Lamp5	6	Lamp5 Lsp1	Core	1.231511927	14375.43873	8.62058349	187.8055689	0.615755964	0	0	0	0	46.18169727	0	0	504.3041342	0	0	0	0	0	0
F2S4_160601_011_E01	ALM	L2/3	GABAergic	Lamp5	6	Lamp5 Lsp1	Core	19.96009006	32195.62526	1.535391543	788.1676586	0	0	0	0	1.535391543	11.25953798	0	0	520.497733	0	36.33759985	0	0	0	0
F2S4_160601_011_H01	ALM	L2/3	GABAergic	Lamp5	6	Lamp5 Lsp1	Core	1.370635952	8758.820613	0.913757301	91.37573015	1.370635952	0	18.27514603	0	0	22.38705389	0	0.456878651	211.5348153	0	0	0	0	0	0
F2S4_160601_012_F01	ALM	L2/3	GABAergic	Lamp5	6	Lamp5 Lsp1	Core	1.86033446	17958.27363	0	0	0	0	0	0.465083615	0	91.62147217	0	0	283.2359216	0	0	0	0	0	0
F2S4_160601_012_G01	ALM	L2/3	GABAergic	Lamp5	6	Lamp5 Lsp1	Core	0	23177.37766	0.777581698	704.489018	0	0	0	0	0	83.59003249	0	0	573.8552928	0	57.92983647	0	0.388790849	0	0
F2S4_160601_012_H01	ALM	L2/3	GABAergic	Lamp5	6	Lamp5 Lsp1	Core	5.909484427	18116.70641	1.181896885	0.590948443	2.363793771	0.590948443	0	0	0	177.2845328	0	0	558.4462784	13.00086574	0	0	0	0	0
F2S4_160601_013_C01	ALM	L6	GABAergic	Lamp5	6	Lamp5 Lsp1	Core	1.630324027	20837.71483	1.630324027	62.49575436	0.543441342	0	0	0	0	24.99830175	0	0	357.0409619	0	0	0	0	0	0
F2S4_160601_013_D01	ALM	L6	GABAergic	Lamp5	6	Lamp5 Lsp1	Core	2.309386154	33561.73162	1.154693077	1476.275099	0	0.577346538	0	0.577346538	0	31.17671307	0	0	623.5342615	0	68.70423807	0	0	0	0
F2S4_160601_014_A01	ALM	L1	GABAergic	Lamp5	6	Lamp5 Lsp1	Core	1.599036314	38736.1217	0	2081.945281	0.533012105	0	0	0.533012105	0	107.135433	0	0	511.1586084	0	0	0	0	0	0
F2S4_160601_014_E01	ALM	L1	GABAergic	Lamp5	6	Lamp5 Lsp1	Core	41.51413368	16741.51791	0	579.9398674	0.629002025	0	0	0	0	16.98305469	0	0	507.6046345	0	0	0	0	0	0
F2S4_160601_015_G01	ALM	L1	GABAergic	Lamp5	6	Lamp5 Lsp1	Core	0.514696383	28115.80463	0	1684.601262	0	0	0	0	0	70.5134045	0	0	89.04247429	0	0	0	0	0	0
F2S4_160601_016_G01	ALM	L1	GABAergic	Lamp5	6	Lamp5 Lsp1	Core	1.041798519	35436.77663	0	1796.060647	0	0	0	0	0	167.2086623	0	0	232.8419691	0	64.07060894	0	0	0	0
F2S4_160601_017_E01	ALM	L1	GABAergic	Lamp5	6	Lamp5 Lsp1	Core	41.07410656	15464.86787	0.933502422	280.0507265	0.466751211	0	0	0	0	39.67385292	0	0	386.4700026	0	0.933502422	0	0	0	0
F2S4_160601_018_C01	ALM	L6	GABAergic	Lamp5	6	Lamp5 Lsp1	Core	0	50365.76529	0.620940986	902.2272532	0	0	0	0	0	134.744194	0	0	505.4459629	9.314114796	0	0	0	0	0
F2S4_160601_019_H01	ALM	L6	GABAergic	Lamp5	6	Lamp5 Lsp1	Core	2.288489242	27989.36768	1.144244621	0	0	0	0	0	0	10.29820159	0	0	441.6784238	5.149100795	0	0	0	0	0
F2S4_160602_001_A01	ALM	L1	GABAergic	Lamp5	6	Lamp5 Lsp1	Core	0.578145633	11765.26362	0	1978.9925	0	0	0	0	2.31258253	70.53376717	0	0	611.6780793	0	0	0	0	0	0
F2S4_160602_001_C01	ALM	L1	GABAergic	Lamp5	6	Lamp5 Lsp1	Core	0	5244.490614	0	725.6807895	0	0	0	0	0	0	0	0	350.2263115	0	0	0	0	0	0
F2S4_160602_002_E01	ALM	L1	GABAergic	Lamp5	6	Lamp5 Lsp1	Core	34.29672996	13135.20216	0	150.9946943	0	0.890824155	0	0	0	48.54991644	0	0	244.0858184	0	0	0	0	0	0
F2S4_160602_003_A01	ALM	L2/3	GABAergic	Lamp5	6	Lamp5 Lsp1	Core	0.710916983	31054.98658	0	694.5658928	0	0	0.710916983	0	0	36.25676615	0	0	248.1100272	0	0	0	0	0	0
F2S4_160602_004_D01	ALM	L2/3	GABAergic	Lamp5	6	Lamp5 Lsp1	Core	0.53990841	13648.8846	1.07981682	0	0	0	0	0	0.53990841	7.018809329	0	0	381.1753374	0	0	0	0	0	0
F2S4_160602_004_E01	ALM	L2/3	GABAergic	Lamp5	6	Lamp5 Lsp1	Core	4.549186947	29696.52374	0	481.645168	0.568648368	0	0	0	0	40.94268252	0	0	210.9685446	2.843241842	0	0	0	0	0
F2S4_160602_004_G01	ALM	L2/3	GABAergic	Lamp5	6	Lamp5 Lsp1	Core	0.513888346	31815.34142	0	597.1382586	0.513888346	0.513888346	0	0	0	39.05551433	0	0	310.9024496	0	0	0	0	0	0
F2S4_160602_005_B01	ALM	L2/3	GABAergic	Lamp5	6	Lamp5 Lsp1	Core	3.630299935	17431.49019	12.50436644	0	0	0.403366659	0.806733319	0	0	7.66396653	0	0	277.9196284	0	0	0	0	0	0
F2S4_160602_006_G01	ALM	L2/3	GABAergic	Lamp5	6	Lamp5 Lsp1	Core	2.490064642	27725.62476	0	318.7282742	0	0.830021547	0	0	0	24.07062487	0	0	411.6906875	0	0	0	0	0	0
F2S4_160602_007_G01	ALM	L2/3	GABAergic	Lamp5	6	Lamp5 Lsp1	Core	4.389368598	50518.12107	0.87787372	656.6495423	0	0	0	0	0	15.80172695	0	0	137.826174	8.339800336	0	0	0	0	0
F2S4_160602_007_H01	ALM	L2/3	GABAergic	Lamp5	6	Lamp5 Lsp1	Core	1.593336031	38755.2434	1.593336031	1243.864328	1.593336031	0	0	0	0	60.54676919	0	0	414.2673682	0	0	0	0	0	0
F2S4_160602_008_F01	ALM	L5	GABAergic	Lamp5	6	Lamp5 Lsp1	Core	0	28902.69684	0.549679482	220.9711517	0	0	12.0929486	0	0	181.394229	12.64262808	0	405.1137782	29.13301254	0	0	0	0	0
F2S4_160602_010_F01	ALM	L6	GABAergic	Lamp5	6	Lamp5 Lsp1	Core	1.154971807	34649.7317	1.154971807	17.32457711	0	0	0	0	0.577485904	53.70618903	0	0	164.5834825	0	0	0	0	0	0
F2S4_160602_011_F01	ALM	L6	GABAergic	Lamp5	6	Lamp5 Lsp1	Core	0.567598417	29565.63396	2.270393669	17.02795252	0	0	42.00228288	0	0	18.16314935	0	0	431.9423956	0	0	0	0	0	0
F2S4_160602_012_A01	ALM	L6	GABAergic	Lamp5	6	Lamp5 Lsp1	Core	1.461268352	1381.385682	0.974178901	889.9124262	0	0	0	0	0	10.71596791	0	0	210.4226426	0	0	0	0	0	0
F2S4_160602_012_E01	ALM	L6	GABAergic	Lamp5	6	Lamp5 Lsp1	Core	16.28779447	6648.436402	6.635768117	1342.838166	0	0	0	0	0	236.4746456	0	0	553.1817603	0	34.98859553	0	0	0	0
F2S4_160602_012_G01	ALM	L6	GABAergic	Lamp5	6	Lamp5 Lsp1	Core	1.907309828	50476.95461	1.271539886	520.6955832	0	0	0	0	0	101.0874209	0	0	485.0924664	0	76.29239314	0	0	0	0
F2S4_160602_013_A01	ALM	L6	GABAergic	Lamp5	6	Lamp5 Lsp1	Core	2.082608759	33293.97203	3.471014598	0.69420292	0.69420292	0	0	0	0.69420292	6.247826277	0	0	208.2608759	0.69420292	0	0	0	0	0
F2S4_160602_013_C01	ALM	L6	GABAergic	Lamp5	6	Lamp5 Lsp1	Core	0	31215.81396	4.191392389	238.9093662	0	0	0	0	0	18.86126575	0	0	311.8395937	4.610531628	20.95696194	0	0	0	0
F2S4_160602_015_H01	ALM	L6	GABAergic	Lamp5	6	Lamp5 Lsp1	Core	0	32117.36597	4.032501966	717.2812872	0	0	0	0	0	61.99971772	0	0	188.5194669	18.14625885	0	0	0	0	0
F2S4_160613_003_C01	ALM	L1	GABAergic	Lamp5	6	Lamp5 Lsp1	Core	1.230700312	16316.00938	0	252.2935639	0	0	0	0	0	9.845602492	0	0	195.0659994	17.84515452	0	0	0	0	0
F2S4_160613_005_A01	ALM	L1	GABAergic	Lamp5	6	Lamp5 Lsp1	Core	2.442180164	18380.33635	0	1431.606012	0	0	0	0	0	22.95649354	0	0	528.9762234	0	21.49118544	0	0	0	0
F2S4_160613_006_E01	ALM	L1	GABAergic	Lamp5	6	Lamp5 Lsp1	Core	1.919113216	18362.71496	0	917.3361173	0.639704405	0	0	0	0	65.24984935	0	0	250.1244225	0	0	0	0	0	0
F2S4_160613_006_H01	ALM	L1	GABAergic	Lamp5	6	Lamp5 Lsp1	Core	0	26250.28315	0	319.2450632	0	0	0	0	0	176.1137483	0	0	306.7988619	0	0	0	0	0	0
F2S4_160613_007_C01	ALM	L5	GABAergic	Lamp5	6	Lamp5 Lsp1	Core	4.523427802	24286.93007	0	778.0295819	0	0	0	0	0	25.2019549	0	0	222.9403702	0	0	0	0	0	0
F2S4_160613_008_E01	ALM	L5	GABAergic	Lamp5	6	Lamp5 Lsp1	Core	4.334239189	30838.97868	0	0	0	0.866847838	4.334239189	0	0	23.40489162	0	0	265.2554384	0	0	0	0	0	0
F2S4_160613_009_G01	ALM	L5	GABAergic	Lamp5	6	Lamp5 Lsp1	Core	1.383373328	24059.1678	0	0	0.461124443	0	0	0	0	4.611244427	0	0	528.9097358	0	0	0	0	0	0
F2S4_160613_010_B01	ALM	L5	GABAergic	Lamp5	6	Lamp5 Lsp1	Core	0	35518.0816	0.633719585	0	0	0	0	0	0	268.0633846	0	0	369.4585183	2.534878342	0	0	0	0	0
F2S4_160613_011_B01	ALM	L5	GABAergic	Lamp5	6	Lamp5 Lsp1	Core	2.932424047	25327.93298	0.586484809	0	0	0	0	0	0	9.970241761	0	0	253.3614377	0	18.18102909	0	0	0	0
F2S4_160613_011_D01	ALM	L5	GABAergic	Lamp5	6	Lamp5 Lsp1	Core	0.599754461	37181.17803	0.599754461	250.6973645	0	0	0	0	0	36.58502209	0	0	642.3370272	0	22.19091504	0	0	0	0
F2S4_160613_013_E01	ALM	L2/3	GABAergic	Lamp5	6	Lamp5 Lsp1	Core	13.67537911	32669.95472	0	374.4949972	0	0	0.52597612	0	0	25.24685374	0	0	321.8973852	0	0	0	0	0	0
F2S4_160613_013_H01	ALM	L2/3	GABAergic	Lamp5	6	Lamp5 Lsp1	Core	0.516487575	41265.29126	0.516487575	0	0	0	0	0	0	186.4520144	0	0	327.9696099	5.681363321	0	0	0	0	0
F2S4_160613_015_H01	ALM	L2/3	GABAergic	Lamp5	6	Lamp5 Lsp1	Core	1.44930967	34048.63207	0.966206446	0.483103223	0	0	0	0	2.898619339	54.107561	0	0	232.3726504	0	25.60447083	0	0	0	0
F2S4_160613_016_A01	ALM	L2/3	GABAergic	Lamp5	6	Lamp5 Lsp1	Core	0.556731806	28612.67444	0	225.4763815	0	0	0.556731806	0	0	30.06351753	0	0	401.960364	19.48561322	20.59907683	0	0	0	0
F2S4_160613_016_F01	ALM	L2/3	GABAergic	Lamp5	6	Lamp5 Lsp1	Core	1.158325085	32649.13001	0	11.58325085	0	0	0	0	0	85.13689375	0	0	122.782459	6.949950511	0	0	0	0	0
F2S4_160613_017_C01	ALM	L2/3	GABAergic	Lamp5	6	Lamp5 Lsp1	Core	1.756262393	37364.4824	0	235.3391606	0	1.170841595	1.170841595	0	0	51.51703018	0	0	310.2730227	23.4168319	26.34393589	0	0	0	0
F2S4_160613_017_F01	ALM	L2/3	GABAergic	Lamp5	6	Lamp5 Lsp1	Core	6.317757954	29509.67306	0.574341632	668.5336599	0	1.148683264	0	0	0	52.26508853	0.574341632	0	426.7358327	5.16907469	0	0	0	0	0
F2S4_160613_018_A01	ALM	L2/3	GABAergic	Lamp5	6	Lamp5 Lsp1	Core	0.596540542	39235.06799	0	1192.484544	0	0.596540542	0	0	0	72.77794613	0	0	391.3305956	0	0	0	0	0	0
F2S4_160613_018_D01	ALM	L2/3	GABAergic	Lamp5	6	Lamp5 Lsp1	Core	0	27882.05854	0	0	0.290138904	0.290138904	0	0	0	17.69847314	0	0	203.6775106	3.191527944	0	0	0	0	0
F2S4_160613_018_E01	ALM	L2/3	GABAergic	Lamp5	6	Lamp5 Lsp1	Core	7.544770669	33983.65903	0	518.0742526	0.502984711	1.508954134	0.502984711	0	0	87.01635505	0	0	277.1445759	0	0	0	0	0	0
F2S4_160613_019_F01	ALM	L2/3	GABAergic	Lamp5	6	Lamp5 Lsp1	Core	1.070380172	23438.11463	0.535190086	0.535190086	0	0	0	0	0	141.2901827	0	0	286.3266961	0	0	0	0	0	0
F2S4_160613_019_H01	ALM	L2/3	GABAergic	Lamp5	6	Lamp5 Lsp1	Core	1.200339696	29099.23508	1.800509544	20.40577483	0	0	0	0	0	48.01358785	0	0	301.2852637	0	0	0	0	0	0
F2S4_160613_020_G01	ALM	L6	GABAergic	Lamp5	6	Lamp5 Lsp1	Core	2.235113862	13260.37177	0	0	0.558778466	0.558778466	0	0	0	6.146563121	17.8809109	0	224.0701647	0	0	0	0	0	0
F2S4_160613_021_B01	ALM	L6	GABAergic	Lamp5	6	Lamp5 Lsp1	Core	2.488742175	5449.847614	2.488742175	1958.640092	0	0	0	0	0	3.484239045	0	0.497748435	212.5385817	0	15.43020148	0	0	0	0
F2S4_160613_021_F01	ALM	L6	GABAergic	Lamp5	6	Lamp5 Lsp1	Core	1.522343435	21003.77237	3.552134681	1824.78233	0	0	11.16385185	0	0	38.05858586	0	0.507447812	975.3146938	0	0	0	0	0	0
F2S4_160613_022_A01	ALM	L6	GABAergic	Lamp5	6	Lamp5 Lsp1	Core	0	41036.93581	0.625172313	1304.109445	0.625172313	0	0	0	0.625172313	42.51171729	0	0	474.5057857	0	0	0	0	0	0
F2S4_160613_022_H01	ALM	L6	GABAergic	Lamp5	6	Lamp5 Lsp1	Core	2.573429597	3485.067031	0.643357399	2099.918551	0	0	0	0	0	20.58743677	0	0	640.1406122	0	137.035126	0	0	0	0
F2S4_160613_026_B01	ALM	L5	GABAergic	Lamp5	6	Lamp5 Lsp1	Core	0	29444.90113	1.061364373	989.7222781	0	0	22.28865184	0	0	13.79773685	0	0	363.5172979	0	0	0	0	0	0
F2S4_160613_027_H01	ALM	L5	GABAergic	Lamp5	6	Lamp5 Lsp1	Core	0	35199.86145	0.534546112	207.9384374	0	0	0	0	0	51.31642671	0	0	755.3136556	11.76001445	40.09095837	0	0	0	0
F2S4_160613_028_A01	ALM	L5	GABAergic	Lamp5	6	Lamp5 Lsp1	Core	0.573903572	31270.2839	0.573903572	682.9452502	0	0	0	0	0	34.43421429	0	0	153.8061572	0	23.53004643	0	0	0	0
F2S4_160613_028_H01	ALM	L5	GABAergic	Lamp5	6	Lamp5 Lsp1	Core	0	24761.11731	0.514196185	0	0	0	0	0	0	0	0	0	327.5429701	0	0	0	0	0	0
F2S4_160620_001_E01	ALM	L2/3	GABAergic	Lamp5	6	Lamp5 Lsp1	Core	5.729403154	34129.6965	0.358087697	1397.258194	0	1.432350788	0.358087697	0	0	117.8108523	0	0	382.4376605	0	56.93594384	0.358087697	0	0	0
F2S4_160620_001_G01	ALM	L2/3	GABAergic	Lamp5	6	Lamp5 Lsp1	Core	0.337752259	50787.80714	1.013256776	1085.873512	0	0	0	0	0	291.8179515	0	0	411.7200034	0	0	0	0	0	0
F2S4_160620_003_D01	ALM	L2/3	GABAergic	Lamp5	6	Lamp5 Lsp1	Core	0.392058464	23122.82408	0.784116928	293.2597309	0	0	0	0	0	78.41169275	0	0	150.9425085	0	0	0	0	0	0
F2S4_160620_004_F01	ALM	L2/3	GABAergic	Lamp5	6	Lamp5 Lsp1	Core	0	33669.69395	1.581434716	141.6965505	0	0	0	0	0	82.23460521	0	0	754.3443593	0	0	0	0	0	0
F2S4_160620_006_B01	ALM	L2/3	GABAergic	Lamp5	6	Lamp5 Lsp1	Core	0	46149.4619	0	266.6894242	0	0	0	0	0	195.8262343	0	0	404.6059549	0	0	0	0	0	0
F2S4_160620_007_E01	ALM	L2/3	GABAergic	Lamp5	6	Lamp5 Lsp1	Core	2.088916834	43336.66864	0.696305611	155.9724569	0	0.696305611	0	0	0	194.2692656	0	0	660.7940251	0	0	0	0	0	0
F2S4_160620_011_B01	ALM	L6	GABAergic	Lamp5	6	Lamp5 Lsp1	Core	3.034168377	44395.34486	0.606833675	1554.707876	0	1.820501026	0.606833675	0	0	108.6232279	0	0	442.3817494	0	33.37585215	0	0	0	0
F2S4_160620_012_C01	ALM	L2/3	GABAergic	Lamp5	6	Lamp5 Lsp1	Core	0.955289582	34818.39467	0	0	0.477644791	0	0	0	0	96.48424775	0	0	522.5434012	20.06108122	0	0	0	0	0
F2S4_160620_013_D01	ALM	L2/3	GABAergic	Lamp5	6	Lamp5 Lsp1	Core	0.503470929	33920.85034	0.503470929	1246.090548	0	0	0.503470929	0	0	65.45122072	0	0	530.1548878	2.013883714	29.70478479	0	0	0	0
F2S4_160620_014_C01	ALM	L2/3	GABAergic	Lamp5	6	Lamp5 Lsp1	Core	1.562970519	34093.07594	0	350.6263865	0	0.520990173	18.75564623	0	0	82.31644735	0	0	367.8190622	0	0	0	0	0	0
F2S4_160620_019_D01	ALM	L6	GABAergic	Lamp5	6	Lamp5 Lsp1	Core	0	36341.39386	1.216041287	1084.708828	0	0	0	0	0	31.61707346	0	0	912.6389859	0	0	0	0	0	0
F2S4_160620_019_E01	ALM	L6	GABAergic	Lamp5	6	Lamp5 Lsp1	Core	2.89763524	48553.50049	0	0	0	0	0	0	0	94.1731453	0	0	801.1961438	0	0	0	0	0	0
F2S4_160620_025_E01	ALM	L2/3	GABAergic	Lamp5	6	Lamp5 Lsp1	Core	4.862834404	34104.55393	1.870320925	1.49625674	0.74812837	0.374064185	0.74812837	0	0	0.374064185	0	0	518.8270245	0	0	0	0	0	0
F2S4_160620_028_F01	ALM	L2/3	GABAergic	Lamp5	6	Lamp5 Lsp1	Core	0.50886649	44680.0044	0	598.4269919	0	0	0	0	0	352.1356109	0	0	887.4631581	47.32458354	0	0	0	0	0
F2S4_160620_028_G01	ALM	L2/3	GABAergic	Lamp5	6	Lamp5 Lsp1	Core	0	46352.404	0	1063.218647	0	0	0	0	0	138.1112689	0.595307193	0	489.342513	0	0	0	0	0	0
F2S4_160620_032_G01	ALM	L6	GABAergic	Lamp5	6	Lamp5 Lsp1	Core	0	34458.37075	2.175539539	1342.307895	0	0	0	0	0	44.69744871	0	0	317.6287727	0	0	0	0	0	0
F2S4_160620_033_E01	ALM	L6	GABAergic	Lamp5	6	Lamp5 Lsp1	Core	0	39708.7707	0.56180659	1582.047358	0	0	0	0.280903295	0	50.84349641	0	0.280903295	560.1211704	0	0	0	0	0	12.64064828
F2S4_160620_036_C01	ALM	L6	GABAergic	Lamp5	6	Lamp5 Lsp1	Core	0.966046835	30507.75905	0.483023417	533.2578529	0	0	0	0	0	16.42279619	0	0	179.6847113	9.660468349	0	0	0	0	0
F2S4_160623_002_A01	ALM	L6	GABAergic	Lamp5	6	Lamp5 Lsp1	Core	0	24488.67309	1.080915146	557.7522153	0	0	0	0	0	92.41824498	0	0	199.969302	0	1.080915146	0	0	0	0
F2S4_160623_002_G01	ALM	L6	GABAergic	Lamp5	6	Lamp5 Lsp1	Core	0	26716.50943	0	1.282844014	0	0	0	0	0	15.39412817	0	0	397.0402223	0	9.621330104	0	0	0	0
F2S4_160623_003_G01	ALM	L6	GABAergic	Lamp5	6	Lamp5 Lsp1	Core	0	35849.94007	0	718.3245682	0	0	0	0	0	13.86028949	0	0	400.7431526	0	19.88650231	0	0	0	0
F2S4_160623_010_H01	ALM	L6	GABAergic	Lamp5	6	Lamp5 Lsp1	Core	0	16499.50903	0	1542.469371	0	0	0	0	0	39.44934453	0	0	368.3134258	0	1.075891214	0	0	0	0
F2S4_160623_029_B01	ALM	L2/3	GABAergic	Lamp5	6	Lamp5 Lsp1	Core	0.526379232	6497.098861	0	1740.73612	0	0	0	0	0	8.422067712	0	0	431.6309703	0	0	0	0	0	0
F2S4_160629_013_B01	ALM	L1	GABAergic	Lamp5	6	Lamp5 Lsp1	Core	0.591842399	14175.80915	0	701.3332434	0	0	0	0	0	15.97974479	0	0	454.5349628	0.591842399	0	0	0.591842399	0	0
F2S4_160629_014_A01	ALM	L1	GABAergic	Lamp5	6	Lamp5 Lsp1	Core	0	21010.82453	0	523.9499574	0	0	0	0	0	42.04536695	0	0	281.3805327	0	0	0	0	0	0
F2S4_160629_014_E01	ALM	L1	GABAergic	Lamp5	6	Lamp5 Lsp1	Core	0	44182.29396	0	631.826364	0	0	0	0	0	40.72841702	0	0	368.6993541	0	79.84913337	0	0	0	0
F2S4_160629_014_F01	ALM	L1	GABAergic	Lamp5	6	Lamp5 Lsp1	Core	0	25416.18064	0	123.6920453	0	0	0	0	0	7.097084568	0	0	204.8015833	4.055476896	0	0	0	0	0
F2S4_160629_015_H01	ALM	L1	GABAergic	Lamp5	6	Lamp5 Lsp1	Intermediate	1.93700567	12380.37174	0	24.69682229	0	0	37.28735915	0	0	41.16137049	0	0	309.4366558	0	0	0	0	0	0
F2S4_160629_016_E01	ALM	L1	GABAergic	Lamp5	6	Lamp5 Lsp1	Core	0	20687.57401	0	150.297101	0	0	0	0	0	113.3099238	0	0	423.2976945	0	0	0	0	0	0
F2S4_160629_017_B01	ALM	L1	GABAergic	Lamp5	6	Lamp5 Lsp1	Core	0.513157881	15360.86802	0	325.3420967	0	0	0	0	0	28.22368347	0	0	369.9868324	0	0	0	0	0	0
F2S4_160629_017_H01	ALM	L1	GABAergic	Lamp5	6	Lamp5 Lsp1	Core	0	20370.83721	0	954.8749556	0	0	16.97784134	0	0	133.7648106	0	0	755.2566998	0	16.4633613	0	0	0	0
F2S4_160629_018_G01	ALM	L1	GABAergic	Lamp5	6	Lamp5 Lsp1	Core	0.675520032	53853.13249	0	1690.826641	0	0	0	0	0	217.5174504	0	0	963.2915659	0	0	0	0	0	0
F2S4_160629_020_H01	ALM	L5	GABAergic	Lamp5	6	Lamp5 Lsp1	Core	0	42569.87077	0	524.2924983	0	0	0	0	0	59.74366061	0	0	653.2718029	0	31.82606219	0	0	0	0
F2S4_160629_024_H01	ALM	L5	GABAergic	Lamp5	6	Lamp5 Lsp1	Core	1.183775878	35214.96482	0	1116.892541	0	0	0.591887939	0.591887939	0	32.55383665	0	0	334.4166856	0	64.51578536	0	0	0	0
F2S4_160630_001_B01	ALM	L1	GABAergic	Lamp5	6	Lamp5 Lsp1	Intermediate	2.840122409	12795.22481	0	0	0.473353735	0.473353735	0	0	0	15.14731952	0	0	291.5859007	0	0.473353735	0	0	0	0
F2S4_160630_001_C01	ALM	L1	GABAergic	Lamp5	6	Lamp5 Lsp1	Core	0	15746.43391	0	360.9410417	3.918539656	0	0.435393295	0	0	16.54494521	0	0	401.4326181	0	0	0	0	0	0
F2S4_160707_003_A01	ALM	L1	GABAergic	Lamp5	6	Lamp5 Lsp1	Core	0.577525592	22248.59589	0	653.1814441	0	0	0	0	0	69.88059658	0	0	421.0161563	0	0	0	0	0	0
F2S4_160707_006_D01	ALM	L1	GABAergic	Lamp5	6	Lamp5 Lsp1	Core	0.711674378	62305.66842	0	1850.353382	0	0	0	0	0	104.6161335	0	0	586.4196872	15.65683631	0	0	0	0	0
F2S4_160708_005_E01	ALM	L1	GABAergic	Lamp5	6	Lamp5 Lsp1	Core	9.039687418	60610.04065	0	2242.905972	0	0.531746319	0.531746319	0	0	147.2937303	0	0	359.9922578	0	0	0	0	0	0
F2S4_160721_002_A01	ALM	L1	GABAergic	Lamp5	6	Lamp5 Lsp1	Core	1.250425145	34627.39832	0.625212572	1519.266551	0.625212572	0	0	0	0	178.8107957	0	0	812.1511314	11.87903887	0	0	0	0	0
F2S4_160721_002_B01	ALM	L1	GABAergic	Lamp5	6	Lamp5 Lsp1	Core	0	28714.98997	0	0	0	0	0	0	0	101.1597157	0	0	228.1841314	37.93489338	0	0	0	0	0
F2S4_160721_002_E01	ALM	L1	GABAergic	Lamp5	6	Lamp5 Lsp1	Intermediate	4.812629302	9577.733889	0	473.4424076	1.804735988	0	1.203157325	0	0	54.14207965	0	0	380.1977148	0	0	0	0	0	0
F2S4_160721_002_F01	ALM	L1	GABAergic	Lamp5	6	Lamp5 Lsp1	Core	2.944873153	12564.00682	0	499.4504867	0	0	0	0	0	71.85490492	0	0	296.8432138	0	0	0	0	0	0
F2S4_160721_002_G01	ALM	L1	GABAergic	Lamp5	6	Lamp5 Lsp1	Core	2.625933191	38160.58632	0	1565.581368	0	0	0	0	0	47.26679744	0	0	337.6950084	0	0	0	0	0	0
F2S4_160721_003_F01	ALM	L1	GABAergic	Lamp5	6	Lamp5 Lsp1	Core	2.804583362	7855.077081	0	143.5946682	0	15.14475016	0	0	0	42.06875043	0	0	130.132668	0	0	0	0	0	0
F2S4_160721_003_G01	ALM	L1	GABAergic	Lamp5	6	Lamp5 Lsp1	Core	3.92318598	14307.36887	0	25.50070887	0	0	0	0	0	11.76955794	0	0	229.5063798	0	0	0	0	0	0
F2S4_160721_005_B01	ALM	L1	GABAergic	Lamp5	6	Lamp5 Lsp1	Core	0	16506.50391	0	995.2003698	0	0	0	0	0	110.5778189	0	0	555.1006507	0	0	0	0	0	7.187558226
F2S4_160721_005_C01	ALM	L1	GABAergic	Lamp5	6	Lamp5 Lsp1	Core	2.690871957	15957.54342	0	592.6645485	0	0	0.672717989	0	0	30.27230951	0	0	261.0145798	0	0	0	0	0	0
F2S4_160721_006_F01	ALM	L1	GABAergic	Lamp5	6	Lamp5 Lsp1	Core	3.43145385	37952.45149	0	1073.473146	0.571908975	0.571908975	0	0	0	94.36498087	0	0	498.7046262	0	0	0	0	0	0
F2S4_160721_006_G01	ALM	L1	GABAergic	Lamp5	6	Lamp5 Lsp1	Intermediate	0	10504.69484	0	21.62095379	0	0	0	0	0	19.76772918	0	0	111.1934766	0	0	0	0	0	0
F2S4_160819_001_G01	ALM	L1	GABAergic	Lamp5	6	Lamp5 Lsp1	Core	0	16764.73418	1.045867568	42.35763651	0	0	0	0	0	34.51362975	0	0	265.1274285	18.30268244	0	0	0	0	0
F2S4_160819_002_C01	ALM	L1	GABAergic	Lamp5	6	Lamp5 Lsp1	Core	4.344857888	5651.573898	0.543107236	677.7978305	0.543107236	0	0	0	0	7.060394068	0	0	429.0547164	0	0	0	0	0	0
F2S4_160819_004_B01	ALM	L1	GABAergic	Lamp5	6	Lamp5 Lsp1	Core	1.066504558	28652.1782	0	0	0	0	0.533252279	0	0	62.39051664	0	0	170.6407293	0	0	0	0	0	0
F2S4_160819_005_A01	ALM	L1	GABAergic	Lamp5	6	Lamp5 Lsp1	Core	1.657004489	33316.83693	0	77.32687617	0	0	0	0	0	43.08211672	0	0	1184.75821	0	0	0	0	0	0
F2S4_160819_006_A01	ALM	L1	GABAergic	Lamp5	6	Lamp5 Lsp1	Core	0	22995.34947	0	318.8682596	0	0	0	0	0	47.28046608	0	0	227.6059646	0	20.89136873	0.549772861	0	0	0
F2S4_160819_006_C01	ALM	L1	GABAergic	Lamp5	6	Lamp5 Lsp1	Core	1.743264245	16299.52069	0	0.871632122	0	0	0.435816061	0	0	0	0	0	251.0300513	0.871632122	0	0	0	0	0
F2S4_160819_006_G01	ALM	L1	GABAergic	Lamp5	6	Lamp5 Lsp1	Core	0	26663.03565	0.47033879	916.2199624	0	0	0	0	0	6.584743056	0	0	138.2796042	0	0	0	0	0	0
F2S4_160819_007_C01	ALM	L1	GABAergic	Lamp5	6	Lamp5 Lsp1	Core	0.708263953	43871.99404	0	1145.262812	0.708263953	0	11.33222325	0	0	60.91069996	0	0	208.9378661	0	7.790903483	0	0	0	15.58180697
F2S4_160819_009_B01	ALM	L1	GABAergic	Lamp5	6	Lamp5 Lsp1	Core	3.615351402	18433.12736	0	16.01084192	0	0	0	0	0	56.29618611	0	0	291.810506	14.97788438	0	0	0	0	0
F2S4_160819_009_F01	ALM	L1	GABAergic	Lamp5	6	Lamp5 Lsp1	Core	0	24374.62784	0	3.646712723	0.52095896	0	15.10780985	0	1.562876881	194.3176922	0	0	519.9170425	0	0	0	0	0	0
F2S4_160819_013_A01	ALM	L1	GABAergic	Lamp5	6	Lamp5 Lsp1	Core	1.968413524	16283.37281	0	177.1572172	0	0	0	0	0	25.58937582	0	0	160.7537712	0	0	0	0	0	0
F2S4_160819_013_F01	ALM	L1	GABAergic	Lamp5	6	Lamp5 Lsp1	Core	0	23733.25771	0	1279.180847	0.497542142	0	0	0	0	22.88693852	0	0	248.7710709	0	0	0	0	0	0
F2S4_160819_014_E01	ALM	L1	GABAergic	Lamp5	6	Lamp5 Lsp1	Core	0	44041.62662	0	1890.196456	0.491854399	0	0	0	0	142.1459214	0	0	542.023548	66.4003439	0	0	0	0	0
F2S4_160819_014_G01	ALM	L1	GABAergic	Lamp5	6	Lamp5 Lsp1	Core	0	22284.66604	0	873.5816554	0	0	0	0	0	145.5969426	0	0	379.4344564	6.863155542	20.58946662	0.490225396	0	0	0
F2S4_160819_016_A01	ALM	L1	GABAergic	Lamp5	6	Lamp5 Lsp1	Core	0	1077.799359	0	445.7863063	0	0	87.80639366	0	0	0	0	0	369.076325	0	0	0	0	0	0
F2S4_160819_016_D01	ALM	L1	GABAergic	Lamp5	6	Lamp5 Lsp1	Core	0.495017647	24565.74577	0	73.75762946	0	0	0	0	0	0	0	0	338.0970532	0	0	0	0	0	0
F2S4_160819_017_B01	ALM	L1	GABAergic	Lamp5	6	Lamp5 Lsp1	Core	0	23597.9328	1.004274191	615.117942	0	0	0	0	0	138.0877013	0	0	170.2244754	0	0	0	0	0	0
F2S4_160819_017_G01	ALM	L1	GABAergic	Lamp5	6	Lamp5 Lsp1	Core	0	35898.49117	1.535654834	1713.790795	0	0	0	0	0	216.5273316	0	0	548.7406607	0	0	0	0	0	0
F2S4_160819_018_B01	ALM	L2/3	GABAergic	Lamp5	6	Lamp5 Lsp1	Core	0	46819.68751	1.010995077	4.043980308	0	0	0	0	0	352.3317843	0	0	273.9796659	0	0	0	0	0	0
F2S4_161004_026_E01	ALM	L1-L2/3	GABAergic	Lamp5	6	Lamp5 Lsp1	Core	0	36971.82059	0	113.6504525	0	0	0	0	0	39.35946408	0	0	320.7796323	0	0	0	0	0	0
F2S4_161004_026_H01	ALM	L1-L2/3	GABAergic	Lamp5	6	Lamp5 Lsp1	Core	0	35970.94319	0	0.937255874	0	0	0	0	0	35.61572322	0	0	674.8242294	8.435302867	0	0	0	0	0
F2S4_161011_003_A01	ALM	L1-L2/3	GABAergic	Lamp5	6	Lamp5 Lsp1	Core	0	34166.39275	1.500917811	0	0	0	0	0.500305937	0	119.573119	0	0	237.1450142	0	0	0	0	0	0
F2S4_161011_004_B01	ALM	L5-L6	GABAergic	Lamp5	6	Lamp5 Lsp1	Core	0	47641.05884	4.559662038	0	0	0	1.139915509	0	1.139915509	455.396246	0	0	701.6179961	0	0	0	0	0	0
F2S4_161011_007_G01	ALM	L1-L2/3	GABAergic	Lamp5	6	Lamp5 Lsp1	Intermediate	1.453953299	21921.25389	1.453953299	43.13394787	0	0	0.4846511	2.423255498	0	71.24371165	0	0	134.7330057	0	0	0	0	0	0
F2S4_161019_002_G01	ALM	L1	GABAergic	Lamp5	6	Lamp5 Lsp1	Intermediate	1.106386839	22405.43988	0	0	0	0.55319342	0	0	0	22.68093021	0	0	139.9579352	49.78740777	0	0	0	0	0
F2S4_161019_002_H01	ALM	L1	GABAergic	Lamp5	6	Lamp5 Lsp1	Core	0.530115321	21413.47829	0	293.1537727	0.530115321	0	1.060230643	0	0	13.78299835	0	0	326.5510379	0	0	0	0	0	0
F2S4_161019_006_F01	ALM	L1	GABAergic	Lamp5	6	Lamp5 Lsp1	Intermediate	3.661337955	15299.99905	0	0	0.732267591	1.464535182	1.464535182	0	0	13.91308423	0	0	252.6323189	0	0	0	0	0	0
F2S4_161019_007_H01	ALM	L1	GABAergic	Lamp5	6	Lamp5 Lsp1	Core	1.411935799	11977.45139	0	254.8544118	0	0	0	0	0	17.64919749	0	0	356.5137893	0	0	36.71033078	0	0	0
F2S4_161019_009_G01	ALM	L1	GABAergic	Lamp5	6	Lamp5 Lsp1	Core	2.419173888	39644.2121	0	0	0	0.604793472	0	0	0	44.14992346	0	0	446.9423759	18.14380416	0	0	0	0	0
F2S4_161019_012_C01	ALM	L1	GABAergic	Lamp5	6	Lamp5 Lsp1	Core	2.887669651	14392.14554	0	658.3886803	0.57753393	0	0	0	0	102.8010396	0	0	807.9699682	0	0	39.27230725	0	0	0
F2S4_161019_013_A01	ALM	L1	GABAergic	Lamp5	6	Lamp5 Lsp1	Core	2.087862255	11575.52591	0	0	0.417572451	0	0	0	0	48.85597676	0	0	119.425721	7.933876567	0	0	0	0	0
F2S4_161020_003_A01	ALM	L1	GABAergic	Lamp5	6	Lamp5 Lsp1	Intermediate	0	5836.636136	0	55.49482672	0	0	0	0	0	7.743464194	0	0.645288683	272.3118241	0	0	0	0	0	0
F2S4_161020_004_B01	ALM	L1	GABAergic	Lamp5	6	Lamp5 Lsp1	Core	0	28705.75635	0	0	0	0	0	0	0	39.1691922	0	0	408.0611367	0	0	0	0	0	0
F2S4_161020_005_G01	ALM	L1	GABAergic	Lamp5	6	Lamp5 Lsp1	Intermediate	0	9840.950385	0	0.611353071	0	0	0	1.222706142	0	44.62877419	0	0	273.2748228	0.611353071	0	0	0	0	0
F2S4_161114_003_C01	ALM	L1-L6	GABAergic	Lamp5	6	Lamp5 Lsp1	Core	0	40049.12419	0	282.8983997	0	0	0	0	0	80.82811419	0	0	373.9808268	0	0	0	0	0	0
F2S4_170119_001_B01	ALM	L1-L6	GABAergic	Lamp5	6	Lamp5 Lsp1	Core	1.089838671	33824.77792	0	1066.952059	0	0	0.544919336	0	0	144.4036239	0	0	881.679485	0	0	0	0	0	0
F2S4_170119_001_E01	ALM	L1-L6	GABAergic	Lamp5	6	Lamp5 Lsp1	Core	0	64263.96487	0	157.1673054	0	0	0	1.587548539	0	261.945509	0	0	217.4941499	0	0	0	0	0	0
F2S4_170119_003_D01	ALM	L1-L6	GABAergic	Lamp5	6	Lamp5 Lsp1	Core	0.547121376	43671.2282	0	140.6101935	0	0	22.4319764	0	0	192.5867242	0	0	721.105973	0	0	0	0	0	0
F2S4_170405_001_C01	ALM	L1-L6	GABAergic	Lamp5	6	Lamp5 Lsp1	Core	3.152934673	17732.63009	14.18820603	1274.311097	0	1.050978224	0	0	0	8.933314906	0	0	492.3832981	0	0	0	0	0	5.254891121
F2S4_170405_002_H01	ALM	L1-L6	GABAergic	Lamp5	6	Lamp5 Lsp1	Core	0	52468.18225	24.31565728	0.715166391	0	0	0	4.290998344	1.430332781	106.5597922	0	0	791.6891944	3.575831953	0	0	0	0	0
F2S4_170828_017_D01	ALM	L5	GABAergic	Lamp5	6	Lamp5 Lsp1	Core	0	45147.67717	3.065431638	0	0	0	0	0	0	130.7917499	0	0	573.2357164	0	0	0	0	0	0
F2S4_170828_017_H01	ALM	L5	GABAergic	Lamp5	6	Lamp5 Lsp1	Core	1.112584668	14921.98556	1.112584668	1101.458821	0	0	0	0	0	6.675508006	0	0	75.6557574	0	62.30474139	0	0	0	0
F2S4_170828_019_E01	ALM	L5	GABAergic	Lamp5	6	Lamp5 Lsp1	Core	0	21326.84463	4.209799571	0	0	0	0	0	0	0	0	0	266.0593329	0	6.735679314	0	0	0	0
F2S4_170828_022_G01	ALM	L5	GABAergic	Lamp5	6	Lamp5 Lsp1	Core	0	1457.391554	2.282523969	2551.861798	0	0	0	0	0	13.69514382	0	0	776.0581496	0	0	0	0	0	0
F2S4_170828_024_D01	ALM	L5	GABAergic	Lamp5	6	Lamp5 Lsp1	Core	0.989994129	57928.51648	0	760.3154913	0	0	0	0	0	174.2389668	0	0	349.4679277	0	0	0	0	0	0
F2S4_171006_001_C01	ALM	L5	GABAergic	Lamp5	6	Lamp5 Lsp1	Core	0.944145308	39224.51681	1.888290615	92.52624016	0	0	0	0	0	69.86675277	0	0	450.3573118	0	0	0	0	0	0
F2S4_171006_002_B01	ALM	L5	GABAergic	Lamp5	6	Lamp5 Lsp1	Core	5.120820642	39551.17031	1.024164128	113.6822183	0	1.024164128	0	0	0	102.4164128	0	0	436.2939187	0	0	0	0	0	0
F2S4_171006_002_G01	ALM	L5	GABAergic	Lamp5	6	Lamp5 Lsp1	Core	3.704111842	26497.36406	0	5.556167763	0	0	18.52055921	0	0	49.07948191	0	0	228.7289062	0	12.96439145	0	0	0	0
F2S4_171006_003_A01	ALM	L5	GABAergic	Lamp5	6	Lamp5 Lsp1	Core	0.927947649	27463.53862	0	89.08297429	0.927947649	0	0	0	0	68.66812602	0	0	1028.165995	0	0	0	0	0	0
F2S4_171006_003_D01	ALM	L5	GABAergic	Lamp5	6	Lamp5 Lsp1	Core	1.00865934	19049.5403	1.00865934	2138.357802	0	0	0	0	0	58.50224175	0	0	335.8835604	0	65.56285713	0	0	0	0
F2S4_171006_004_B01	ALM	L5	GABAergic	Lamp5	6	Lamp5 Lsp1	Core	1.735323286	35649.61393	0	0	0	0	0	0	0	40.78009723	0	0	657.6875255	17.35323286	0	0	0	0	0
F2S4_171006_004_E01	ALM	L5	GABAergic	Lamp5	6	Lamp5 Lsp1	Core	8.054926544	36318.65692	1.006865818	985.7216358	0	0	2.013731636	1.006865818	0	72.4943389	0	0	663.5245741	0	101.6934476	0	0	0	0
F2S4_171006_005_A01	ALM	L5	GABAergic	Lamp5	6	Lamp5 Lsp1	Core	0	46633.66844	0	0	0	0	0	0	0	97.78402768	0	0	484.2637561	0	0	0	0	0	0
F2S4_171006_005_D01	ALM	L5	GABAergic	Lamp5	6	Lamp5 Lsp1	Core	0	45129.08928	0	0	0	0	0	0	0	145.5620555	0	0	726.1929215	0	0	0	0	0	0
F2S4_171006_005_E01	ALM	L5	GABAergic	Lamp5	6	Lamp5 Lsp1	Core	0	55578.10348	0	453.3477401	0	0	0	0	0	218.6103727	0	0	535.774602	0	0	0	0	0	0
F2S4_171006_006_F01	ALM	L5	GABAergic	Lamp5	6	Lamp5 Lsp1	Core	0.902426897	1505.248064	0	1170.447685	0	0	0	0.902426897	0	14.43883035	0	0	128.1446193	0	38.80435656	0	0	0	0
F2S4_171006_007_C01	ALM	L5	GABAergic	Lamp5	6	Lamp5 Lsp1	Core	0	52658.00417	0.928057881	0	0	0	0	0	0	305.3310429	0	0	636.6477064	2.784173643	0	0	0	0	0
F2S4_171006_008_C01	ALM	L5	GABAergic	Lamp5	6	Lamp5 Lsp1	Core	0	39064.17757	0	557.3103547	0	0	0	0	0	0.819574051	0	0	301.6032508	0	0	0	0	0	0
F2S4_171006_008_D01	ALM	L5	GABAergic	Lamp5	6	Lamp5 Lsp1	Core	0.987620181	42340.26478	0.987620181	0	0	0	0	0	0	57.2819705	0	0	449.3671824	0	0	0	0	0	21.72764398
F2S4_171006_008_H01	ALM	L5	GABAergic	Lamp5	6	Lamp5 Lsp1	Core	0	37062.03518	0	1405.255481	0	0	0	0	0	13.59611384	0	0	692.430655	0	31.07683164	0	0	0	0
F2S4_171006_010_E01	ALM	L5	GABAergic	Lamp5	6	Lamp5 Lsp1	Core	0	39857.05541	0.900154827	708.4218486	0	0	0	2.70046448	0	91.81579232	0	0	688.6184424	0	21.60371584	0	0	0	0
F2S4_171006_011_B01	ALM	L5	GABAergic	Lamp5	6	Lamp5 Lsp1	Core	0	21847.83028	0	0	0	0	0	0	0	69.80430913	0	0	253.4998595	0	0	0	0	0	0
F2S4_171006_013_F01	ALM	L5	GABAergic	Lamp5	6	Lamp5 Lsp1	Core	0	49469.33556	0	1161.582633	0	0	92.57845233	0	0	95.74352762	0	0	806.3029309	0	0	0	0	0	0
F2S4_171006_014_B01	ALM	L5	GABAergic	Lamp5	6	Lamp5 Lsp1	Intermediate	0.994887274	51527.20171	0	647.6716156	0	0	0	0.994887274	0	250.7115931	0	0	325.3281387	0	0	0	0	0	0
F2S4_171006_015_A01	ALM	L5	GABAergic	Lamp5	6	Lamp5 Lsp1	Core	0	57549.86747	0	12.29019611	0	0	0	0	0	579.6875832	0	0	482.3901973	12.29019611	0	0	0	0	0
F2S4_171006_015_B01	ALM	L5	GABAergic	Lamp5	6	Lamp5 Lsp1	Core	0	20376.43595	0	1.006890149	0	0	0	0	0	41.28249612	0	0	624.2718926	20.13780299	0	0	0	0	0
F2S4_171006_015_C01	ALM	L5	GABAergic	Lamp5	6	Lamp5 Lsp1	Core	0	31270.55634	0	737.8831497	0	0	0	0	0	82.53178086	0	0	674.9628811	0	302.3441477	0	0	0	0
F2S4_171006_015_H01	ALM	L5	GABAergic	Lamp5	6	Lamp5 Lsp1	Core	0.940110275	58727.74876	0	139.1363207	0	0	0	0	0	213.4050324	0	0	701.3222651	0	0	0	0	0	0
F2S4_171006_016_B01	ALM	L5	GABAergic	Lamp5	6	Lamp5 Lsp1	Core	2.027096195	43217.69087	1.013548097	0	0	0	29.39289483	0	0	101.3548097	0	0	841.2449209	32.43353912	0	0	0	0	0
F2S4_171006_016_E01	ALM	L5	GABAergic	Lamp5	6	Lamp5 Lsp1	Core	0	43426.98205	3.84173585	568.5769058	0	0	0	0	0	107.5686038	0	0	218.0185095	0	24.01084906	0	0	0	0
F2S4_171204_004_A01	ALM	L2/3	GABAergic	Lamp5	6	Lamp5 Lsp1	Core	0	52190.43677	0	1181.528273	0	0	0	0	0	73.37516345	0	0	419.5554218	0	3.762828895	0	0	0	0
F2S4_171204_004_C01	ALM	L2/3	GABAergic	Lamp5	6	Lamp5 Lsp1	Core	0	41766.74123	0	1720.176287	0	14.34975005	0	0	0	75.33618774	0	0	319.2819385	0	53.81156267	0	0	0	0
F1S4_160108_001_B01	VISp	L2/3	GABAergic	Lamp5	6	Lamp5 Lsp1	Core	0.523664394	18331.91944	1.047328788	0	0	0	0	0	0	35.60917879	0	0	295.8703826	0	23.56489773	0	0	0	0
F1S4_160108_001_C01	VISp	L2/3	GABAergic	Lamp5	6	Lamp5 Lsp1	Core	0.503789251	19733.42496	0	0	0	0	0	0	0	139.0458332	17.63262378	0	455.4254828	7.556838763	0	0	0	0	0
F1S4_160108_003_B01	VISp	L2/3	GABAergic	Lamp5	6	Lamp5 Lsp1	Core	1.247871599	17090.22548	0.6239358	0	0	0	0	0	0	32.44466157	0	0	396.8231685	0	0	0	0	0	0
F1S4_160108_003_C01	VISp	L2/3	GABAergic	Lamp5	6	Lamp5 Lsp1	Core	1.891782475	15049.12959	1.261188317	837.4290424	0.630594158	0	0	0.630594158	0	63.69001	0	0	508.8894859	0	0	0	0	0	23.33198386
F1S4_160108_004_B01	VISp	L2/3	GABAergic	Lamp5	6	Lamp5 Lsp1	Core	1.96447155	13074.04928	0.491117887	27.01148381	0	0	0	0	0	151.2643093	0	0	395.3498994	0	0	0	0	0	0
F1S4_160108_007_A01	VISp	L1	GABAergic	Lamp5	6	Lamp5 Lsp1	Core	1.269227206	3756.912529	0	144.6919014	0	0	0	0	0	98.36510844	0	0	866.2475678	0	0	45.0575658	0	0	10.78843125
F1S4_160108_007_B01	VISp	L1	GABAergic	Lamp5	6	Lamp5 Lsp1	Core	1.333573377	19643.53584	2.667146753	0	0	0	0	0	0.666786688	34.0061211	7.334653571	0	676.1217019	0	0	0	0	0	0
F1S4_160108_008_C01	VISp	L4	GABAergic	Lamp5	6	Lamp5 Lsp1	Core	0.540363243	17382.94516	0	2024.741071	0	0	0	0	0.540363243	39.44651674	22.69525621	0	785.6881553	0	2.161452972	0	0	0	0
F1S4_160108_010_A01	VISp	L4	GABAergic	Lamp5	6	Lamp5 Lsp1	Core	8.121527586	28704.43177	1.476641379	0	0	0	0.73832069	0	0	132.8977241	230.3560552	0	663.7502999	14.76641379	0	0	0	0	0
F1S4_160108_010_C01	VISp	L4	GABAergic	Lamp5	6	Lamp5 Lsp1	Core	2.725122358	36098.60583	0	0	0.545024472	0	0	0.545024472	0	30.52137041	0	0	1173.982712	0	0	0	0	0	0
F1S4_160108_011_F01	VISp	L5	GABAergic	Lamp5	6	Lamp5 Lsp1	Core	1.190089411	22647.4015	0.595044706	1227.577228	0	0	0	0	0	36.29772705	0	0	869.360315	0	0	0	0	0	0
F1S4_160108_012_G01	VISp	L5	GABAergic	Lamp5	6	Lamp5 Lsp1	Core	0.525375092	20637.78435	0	477.0405831	0	0	0	0	0	42.03000732	0	0	695.0712461	0	0.525375092	0	0	0	0
F1S4_160108_013_E01	VISp	L5	GABAergic	Lamp5	6	Lamp5 Lsp1	Core	0	28415.0089	1.261739699	1178.464879	0	0	0.63086985	0	0	27.12740354	0	0	674.3998693	0	0	0	0	0	0
F1S4_160108_013_G01	VISp	L5	GABAergic	Lamp5	6	Lamp5 Lsp1	Core	0.562033617	21198.22195	0	310.8045905	0	0	1.124067235	0	0	80.3708073	0	0	822.817216	19.67117661	0	0	0	0	0
F1S4_170426_009_C01	VISp	L2/3	GABAergic	Lamp5	6	Lamp5 Lsp1	Core	0.553171081	12607.87528	0	0.553171081	0.553171081	0	0	0	0	58.63613457	0	0	1314.887659	0	0	0	0	0	0
F1S4_170426_010_F01	VISp	L2/3	GABAergic	Lamp5	6	Lamp5 Lsp1	Core	1.32198978	13141.9004	0	2065.609031	0	0	0	0	0	183.7565794	0	0	1122.369323	0	0	0	0	0	32.3887496
F1S4_170426_010_H01	VISp	L2/3	GABAergic	Lamp5	6	Lamp5 Lsp1	Core	1.711513307	111.248365	0	1362.792471	0	0	0.427878327	0	0	7.273931556	0	0	788.5797563	0	0	0	0	0	0
F1S4_170426_011_C01	VISp	L2/3	GABAergic	Lamp5	6	Lamp5 Lsp1	Core	2.736885665	22182.45831	0	774.5386432	0	0.547377133	0	1.094754266	0	253.9829897	0.547377133	0	534.2400818	9.852788394	0	0	0	0	0
F1S4_170426_011_F01	VISp	L2/3	GABAergic	Lamp5	6	Lamp5 Lsp1	Core	2.721787583	33201.45365	0.544357517	0	0	0.544357517	0.544357517	0.544357517	1.088715033	23.40737321	0	0	753.390803	0	0	0	0	0	0
F1S4_170426_012_F01	VISp	L2/3	GABAergic	Lamp5	6	Lamp5 Lsp1	Core	0.301298113	29465.75024	0.602596226	173.547713	0	0	0	0	0	7.231154707	0	0.301298113	676.7155613	20.78956978	0	0	0	0	0
F1S4_170426_014_G01	VISp	L2/3	GABAergic	Lamp5	6	Lamp5 Lsp1	Core	2.272039206	9041.580022	0.568009802	369.7743808	0.568009802	1.136019603	0.568009802	0.568009802	0	180.0591071	0	0	481.6723117	0	0	0	0	0	0
F1S4_170426_016_A01	VISp	L2/3	GABAergic	Lamp5	6	Lamp5 Lsp1	Core	0	24524.76562	0	1.062183967	1.062183967	0.531091984	0	0	0	217.7477133	0	0	643.1523921	0	0	0	0.531091984	0	0
F1S4_170426_017_C01	VISp	L2/3	GABAergic	Lamp5	6	Lamp5 Lsp1	Core	0.446524455	31970.2579	0	1300.725736	0	0	0	0	0	410.3559738	0	0	999.3217294	0	0	0	0	0	0
F1S4_180108_301_A01	VISp	L1-L4	GABAergic	Lamp5	6	Lamp5 Lsp1	Intermediate	1.253376282	4713.948198	6.266881412	0	0	0	0	1.253376282	0	50.13505129	0	0	675.5698162	0	0	0	0	0	0
F1S4_180108_302_B01	VISp	L1-L4	GABAergic	Lamp5	6	Lamp5 Lsp1	Core	0	47178.58117	0	0	16.18714186	0	0	1.156224419	0	120.2473395	0	0	416.2407907	48.56142558	0	0	0	0	0
F1S4_180108_302_D01	VISp	L1-L4	GABAergic	Lamp5	6	Lamp5 Lsp1	Core	0	47310.1791	2.422498226	6.056245564	0	0	1.211249113	0	0	193.799858	0	0	649.2295244	0	0	0	0	0	0
F1S4_180108_302_E01	VISp	L1-L4	GABAergic	Lamp5	6	Lamp5 Lsp1	Core	2.669414384	33933.59565	6.67353596	0	0	0	0	0	1.334707192	293.6355822	21.35531507	0	714.0683477	8.008243152	0	0	0	0	0
F1S4_180108_304_C01	VISp	L1-L4	GABAergic	Lamp5	6	Lamp5 Lsp1	Core	1.387476361	34899.19291	1.387476361	699.2880859	0	0	0	0	0	54.11157807	0	0	993.4330744	0	0	0	0	0	0
F1S4_180108_304_E01	VISp	L1-L4	GABAergic	Lamp5	6	Lamp5 Lsp1	Core	1.1034361	4621.190387	0	1369.3642	2.2068722	0	0	0	0	119.1710988	1.1034361	0	1769.911504	0	0	0	0	0	0
F1S4_180124_301_B01	VISp	L1-L4	GABAergic	Lamp5	6	Lamp5 Lsp1	Core	0	37182.53817	0	338.9563507	0	0	0	0	0	187.6207477	0	0	744.287966	0	60.18023982	0	0	0	0
F1S4_180124_301_E01	VISp	L1-L4	GABAergic	Lamp5	6	Lamp5 Lsp1	Core	0	48229.38813	12.17559075	0	0	0	0	0	0	39.33652396	181.6972774	0	470.1651197	0	0	0	0	0	0
F1S4_180124_302_B01	VISp	L1-L4	GABAergic	Lamp5	6	Lamp5 Lsp1	Core	0	36066.98836	0	37.62639333	0	0	0	0	0	145.4887209	0	0	889.6551666	0	0	0	0	0	0
F1S4_180124_302_F01	VISp	L1-L4	GABAergic	Lamp5	6	Lamp5 Lsp1	Core	0	3887.665321	0	1520.897014	0	0	0	0	0	27.85525666	0	0	985.1475771	11.14210266	0	0	0	0	0
F1S4_180124_303_G01	VISp	L1-L4	GABAergic	Lamp5	6	Lamp5 Lsp1	Core	0	45210.84396	0	2405.873335	0	0	0	0	0	84.21694741	0	0	828.5126718	0	77.38854627	0	0	0	0
F1S4_180124_307_B01	VISp	L1-L4	GABAergic	Lamp5	6	Lamp5 Lsp1	Core	0	26076.25327	0	387.0425236	0	0	0	0	0	78.58731444	0	0	679.7802699	0.98234143	0	0	0	0	0
F1S4_180124_308_A01	VISp	L5-L6	GABAergic	Lamp5	6	Lamp5 Lsp1	Core	0	39247.06654	0	447.1389682	0	0	0	0	0	56.65109099	0	0	853.8128713	0	0	0	0	0	22.25578575
F1S4_180124_309_A01	VISp	L5-L6	GABAergic	Lamp5	6	Lamp5 Lsp1	Core	0	55907.41483	0	0	0	0	0	0	0	125.1292857	0	0	1407.923221	14.87550949	70.87742755	0	0	0	0
F1S4_180124_309_F01	VISp	L5-L6	GABAergic	Lamp5	6	Lamp5 Lsp1	Core	0	8200.303728	0	189.6171434	0	0	0	0	0	90.13191571	0	0	1610.470268	0	45.06595786	0	0	0	0
F1S4_180124_310_A01	VISp	L5-L6	GABAergic	Lamp5	6	Lamp5 Lsp1	Core	0	48329.24551	0	0	0	0	0	0	0	60.54851185	0	0	669.8779803	0	0	0	0	0	0
F1S4_180124_310_C01	VISp	L5-L6	GABAergic	Lamp5	6	Lamp5 Lsp1	Core	0	27749.68565	0	642.2010089	0	0	0	0	0	62.01941208	0	0	796.249226	0	59.01847278	0	0	0	0
F1S4_180124_310_D01	VISp	L5-L6	GABAergic	Lamp5	6	Lamp5 Lsp1	Core	0	29095.5624	0	360.7807179	0	0	0	0	0	35.78789963	0	0	528.1133296	0	0	0	0	0	0
F1S4_180124_310_E01	VISp	L5-L6	GABAergic	Lamp5	6	Lamp5 Lsp1	Core	0	37841.82093	0	0	0	0	0	0	0	96.39318136	0	0	359.8678771	0	0	0	0	0	0
F1S4_180124_310_G01	VISp	L1-L4	GABAergic	Lamp5	6	Lamp5 Lsp1	Core	0	9118.852654	0	517.3615132	0	0	0	0	0	34.17433849	0	0	830.6262827	11.39144616	26.58004105	0	0	0	0
F1S4_180124_311_H01	VISp	L1-L4	GABAergic	Lamp5	6	Lamp5 Lsp1	Core	0	16796.94604	0	1347.118911	0	0	0	0	0	115.153991	0	0	1296.85328	0	59.40483665	0	0	0	0
F1S4_180124_312_D01	VISp	L1-L4	GABAergic	Lamp5	6	Lamp5 Lsp1	Core	0	6351.239787	0	1462.312941	0	0	0	0	0	104.3831431	0	0	1233.618964	0	0	0	0	0	0
F1S4_180124_312_F01	VISp	L1-L4	GABAergic	Lamp5	6	Lamp5 Lsp1	Core	0	37670.12612	0	3452.353077	0	0	0	0	0	464.4421179	0	0	1288.826877	0	42.57386081	0	0	0	0
F1S4_180124_313_C01	VISp	L1-L4	GABAergic	Lamp5	6	Lamp5 Lsp1	Core	0	48094.67172	0	0	0	0	0	0	0	51.16659844	0	0	974.0961855	30.89304057	0	0	0	0	0
F1S4_180124_313_G01	VISp	L1-L4	GABAergic	Lamp5	6	Lamp5 Lsp1	Core	0	29960.22831	0	2586.823757	0	0	0	0	0	128.1347245	0	0	1399.497446	0	0	0	0	0	0
F1S4_180124_314_B01	VISp	L1-L4	GABAergic	Lamp5	6	Lamp5 Lsp1	Core	0	14977.05182	0	2254.325611	0	0	0	0	0	341.2890313	0	0	578.4559853	0	0	0	0	0	0
F1S4_180130_330_C01	VISp	L1-L4	GABAergic	Lamp5	6	Lamp5 Lsp1	Core	0	3626.688581	0	660.060236	0	0	0	0	0	45.16968502	0	0	626.5472438	5.828346454	0	0	0	0	0
F1S4_180130_331_A01	VISp	L1-L4	GABAergic	Lamp5	6	Lamp5 Lsp1	Core	0	22950.08384	0	0	0	0	0	0	0	165.9499211	0	0	992.5385755	0	0	0	0	0	0
F1S4_180130_332_C01	VISp	L1-L4	GABAergic	Lamp5	6	Lamp5 Lsp1	Core	0	9234.301687	0	0	0	0	0	0	0	0	19.9660577	0	49.91514425	0	0	0	0	0	0
F1S4_180130_354_A01	VISp	L5-L6	GABAergic	Lamp5	6	Lamp5 Lsp1	Core	0	26302.15199	0	60.00490949	0	0	0	0	0	74.55155422	0	0	1325.563001	27.27495886	0	0	0	0	0
F1S4_180130_354_E01	VISp	L5-L6	GABAergic	Lamp5	6	Lamp5 Lsp1	Core	0	10685.08138	0	4545.06703	0	0	0	0	0	95.90997251	0	0	856.0853101	0	0	0	0	0	0
F1S4_180130_356_E01	VISp	L5-L6	GABAergic	Lamp5	6	Lamp5 Lsp1	Core	0	26603.81509	0	0	0	0	0	0	0	118.8100372	0	0	685.5660255	32.11082086	9.633246259	0	0	0	0
F1S4_180130_356_H01	VISp	L5-L6	GABAergic	Lamp5	6	Lamp5 Lsp1	Core	0	17303.18875	0	1295.743745	0	0	0	0	0	103.5915707	0	0	927.2294689	32.26622694	0	0	0	0	0
F2S4_151217_006_H01	VISp	L2/3	GABAergic	Lamp5	6	Lamp5 Lsp1	Core	4.701078036	27380.64551	0	36.04159827	0	0	0	0	0	70.51617053	25.07241619	0	562.5623383	14.10323411	0	0.783513006	0	0	0
F2S4_151217_013_E01	VISp	L5	GABAergic	Lamp5	6	Lamp5 Lsp1	Core	2.065130072	22397.71239	0	114.9589074	0	0	0	0	0	9.63727367	0	0	446.0680956	0	0	0	0	0	0
F2S4_151223_001_F01	VISp	L2/3	GABAergic	Lamp5	6	Lamp5 Lsp1	Core	2.537955119	35220.04917	0	143.8174567	0	0	0	0	0	85.444489	0	0	518.5888293	0	0	0	0	0	0
F2S4_151223_001_H01	VISp	L2/3	GABAergic	Lamp5	6	Lamp5 Lsp1	Core	4.720811224	22806.23902	0	508.90345	0.944162245	0	0	0	0	72.70049285	0	0	666.5785449	0	17.93908265	0	0	0	0
F2S4_151223_002_C01	VISp	L2/3	GABAergic	Lamp5	6	Lamp5 Lsp1	Core	0	30958.14088	0	0	0	0	0	0	0	95.06512223	0	0	880.7967403	0	0	0	0	0	0
F2S4_151223_003_A01	VISp	L2/3	GABAergic	Lamp5	6	Lamp5 Lsp1	Core	0.567446073	24779.23511	0	137.8893957	0	0	1.134892146	0	0	30.64208793	0	0	547.0180141	0	0	0	0	0	0
F2S4_151223_004_A01	VISp	L2/3	GABAergic	Lamp5	6	Lamp5 Lsp1	Core	2.837877722	34702.27825	0	0	0	0	0	0	0	67.39959589	0	0	262.5036892	0	0	0	0	0	0
F2S4_151223_004_G01	VISp	L2/3	GABAergic	Lamp5	6	Lamp5 Lsp1	Core	0.784764888	44408.2755	0	1086.114605	0	0	0	0	0	54.1487773	0	0	672.5435093	0	0	0	0	0	0
F2S4_151223_005_E01	VISp	L4	GABAergic	Lamp5	6	Lamp5 Lsp1	Core	34.10254287	35784.70299	0	0	0	0	0	0	0	112.7471825	0	0	407.1426036	0	9.743583676	0	0	0	0
F2S4_151223_006_C01	VISp	L4	GABAergic	Lamp5	6	Lamp5 Lsp1	Core	0.628224756	23665.85479	0	496.9257822	0	0	0	0	0	27.01366452	0	0	1127.663437	45.8604072	0	0	0	0	0
F2S4_151223_006_D01	VISp	L4	GABAergic	Lamp5	6	Lamp5 Lsp1	Core	1.335711791	26395.66855	0	0	0.667855895	0	0	0	0	12.68926201	0	0	650.4916421	0	0	0	0	0	0
F2S4_151223_010_G01	VISp	L5	GABAergic	Lamp5	6	Lamp5 Lsp1	Core	0	18366.46224	2.125010094	734.1909874	0	0	0	0	0	141.3131712	0	0	682.1282401	8.500040375	0	0	0	0	0
F2S4_151223_011_E01	VISp	L5	GABAergic	Lamp5	6	Lamp5 Lsp1	Core	0	33268.99153	0.603015924	406.4327327	0	0	27.13571657	0	0	98.89461151	0	0	796.5840354	0	30.15079619	0	0	0	0
F2S4_151223_011_F01	VISp	L5	GABAergic	Lamp5	6	Lamp5 Lsp1	Core	0.777901378	40520.88276	0	0	0	0	0	0	0	36.56136475	0	0.777901378	1015.161298	0	0	0	0	0	0
F2S4_151223_014_A01	VISp	L6	GABAergic	Lamp5	6	Lamp5 Lsp1	Core	0.695525891	33856.11378	7.650784797	627.3643533	0.695525891	0	0.695525891	0	0	82.76758098	0	0.695525891	583.5462222	27.12550973	25.03893206	0	0	0	20.17025083
F2S4_151223_014_E01	VISp	L1	GABAergic	Lamp5	6	Lamp5 Lsp1	Intermediate	1.765592833	118.2947198	0	1490.160351	0	0	0	1.765592833	0	0	0	0	550.8649639	0	0	0	0	0	0
F2S4_151223_014_H01	VISp	L1	GABAergic	Lamp5	6	Lamp5 Lsp1	Core	1.688276607	14572.35954	0	227.917342	0.844138304	0	0	0	0	89.47866018	0	0	991.8625068	2.532414911	0	0	0	0	0
F2S4_151223_015_B01	VISp	L1	GABAergic	Lamp5	6	Lamp5 Lsp1	Core	2.559050081	1756.78788	0	1223.225939	0.63976252	0	0.63976252	0	0.63976252	53.10028917	0	0	944.9292423	0	0	0	0	0	0
F2S4_151223_016_C01	VISp	L1	GABAergic	Lamp5	6	Lamp5 Lsp1	Intermediate	0	10808.18289	0	0	0	0.79829994	0	0	0	23.15069827	0	0	775.9475421	0	0	0	0	0	0
F2S4_151223_016_G01	VISp	L1	GABAergic	Lamp5	6	Lamp5 Lsp1	Intermediate	1.501216361	11476.79908	0	0	0	0	0	0	0	113.3418352	0	0	446.6118673	5.254257262	0	0	0	0	0
F2S4_151223_016_H01	VISp	L1	GABAergic	Lamp5	6	Lamp5 Lsp1	Core	0.76180609	427.3732164	0	1557.131648	0	0.76180609	0	0	0	29.71043751	0	0	492.8885402	0	0	0	0	0	0
F2S4_151223_017_A01	VISp	L1	GABAergic	Lamp5	6	Lamp5 Lsp1	Core	1.843741098	11025.11083	0.460935275	101.4057604	0	0	0	0.921870549	0	0.921870549	20.74208735	0	510.2553489	0	0	0	0	0	0
F2S4_151223_017_C01	VISp	L1	GABAergic	Lamp5	6	Lamp5 Lsp1	Intermediate	0	6182.230414	0	119.4215842	0	0	0	0	0	30.28808294	0	0	392.0143306	13.84598077	0	0	0	0	0
F2S4_151223_017_H01	VISp	L1	GABAergic	Lamp5	6	Lamp5 Lsp1	Core	0.867718863	30225.25114	1.735437725	0.867718863	0	0	0	0	0	48.5922563	0	0	1115.886457	16.48665839	0	0	0	0	0
F2S4_151223_018_E01	VISp	L1	GABAergic	Lamp5	6	Lamp5 Lsp1	Core	0	22078.59562	3.834587403	635.5828621	0	0.958646851	0	0	0	21.09023072	0	0	634.6242152	0	0	0	0	0	0
F2S4_160113_004_H01	VISp	L2/3	GABAergic	Lamp5	6	Lamp5 Lsp1	Core	0.554483861	37608.97687	0	26.61522535	0.554483861	0	0	0	0	116.4416109	0	0	312.174414	0	0	0	0	0	0
F2S4_160113_005_G01	VISp	L2/3	GABAergic	Lamp5	6	Lamp5 Lsp1	Core	0.882367215	38798.5688	0	869.1317065	0	0	0	0	0	291.1811809	0	0	828.5428147	0	2.647101644	0.882367215	0	0	0
F2S4_160113_016_G01	VISp	L5	GABAergic	Lamp5	6	Lamp5 Lsp1	Core	0.721832473	41833.80096	0	0.721832473	0	0	0.721832473	0	0	53.41560299	0	0	496.6207413	0	21.65497418	0	0	0	0
F2S4_160114_006_C01	VISp	L6	GABAergic	Lamp5	6	Lamp5 Lsp1	Core	14.50494619	1922.941437	6.216405509	3124.779836	2.07213517	0	0	0	0	101.5346233	0	0	1031.923314	24.86562203	0	0	0	0	0
F2S4_160114_007_G01	VISp	L6	GABAergic	Lamp5	6	Lamp5 Lsp1	Core	0	8341.627928	1.390155475	708.9792922	0	0	0	0	0	59.77668542	0	0	433.0334305	4.865544162	25.71787629	0	0	0	0
F2S4_160114_008_B01	VISp	L6	GABAergic	Lamp5	6	Lamp5 Lsp1	Core	0	16487.87004	0	1520.133255	0	0	0	0	0	90.9732257	0	0	957.273104	0	0	0	0	0	0
F2S4_160114_010_A01	VISp	L1	GABAergic	Lamp5	6	Lamp5 Lsp1	Core	4.214900939	8470.545921	103.265073	290.8281648	0	11.94221933	2.10745047	0	0	118.7197098	0	0	324.5473723	0	0	0	0	0	0
F2S4_160114_010_B01	VISp	L1	GABAergic	Lamp5	6	Lamp5 Lsp1	Core	2.435626394	27345.38644	0	491.3876251	0	0	0.608906599	0	0	54.80159387	0	0	747.1283965	0	0	0	0	0	0
F2S4_160114_010_H01	VISp	L1	GABAergic	Lamp5	6	Lamp5 Lsp1	Core	1.293425969	22735.19496	0	3004.628525	0	0	1.293425969	0	0	419.0700138	0	0	594.3292325	0	0	0	0	0	0
F2S4_160114_011_G01	VISp	L1	GABAergic	Lamp5	6	Lamp5 Lsp1	Core	2.371971363	15625.36136	1.185985682	10.08087829	0	0	0	0	0	140.5393033	0	0	314.8791985	0	0	0	0	0	0
F2S4_160114_012_B01	VISp	L1	GABAergic	Lamp5	6	Lamp5 Lsp1	Core	4.528443477	26208.69008	0	135.8533043	1.293840993	0.646920497	0	0	0	386.858457	0.646920497	0	899.8664109	16.81993291	0	0	0	0	0
F2S4_160114_012_D01	VISp	L1	GABAergic	Lamp5	6	Lamp5 Lsp1	Core	4.180112696	2034.147341	0.522514087	1222.682964	2.612570435	0.522514087	0	0	0	55.38649322	0	0	289.4728042	0	0	0	0	0	0
F2S4_160114_014_C01	VISp	L1	GABAergic	Lamp5	6	Lamp5 Lsp1	Core	1.573628504	30355.29384	0	485.4643935	0	0	0.786814252	0	0	273.0245455	0	0	300.5630443	21.24398481	0	0	0	0	0
F2S4_160114_016_E01	VISp	L4	GABAergic	Lamp5	6	Lamp5 Lsp1	Core	0	22735.53054	5.898438329	25.36328482	0	0	0	0	0.589843833	98.5039201	0	0	800.4180813	0	0	0	0	0	0
F2S4_160114_017_F01	VISp	L2/3	GABAergic	Lamp5	6	Lamp5 Lsp1	Core	4.475661354	22738.34886	0.497295706	551.5009379	0	0.497295706	4.475661354	0	0	113.8807167	0.497295706	0	577.3603146	0	0	0	0	0	0
F2S4_160114_018_H01	VISp	L2/3	GABAergic	Lamp5	6	Lamp5 Lsp1	Core	2.352843899	26149.17098	0	0	0.336120557	0	0	0	0	15.12542507	0.336120557	0	328.3897842	0	0	0	0	0	0
F2S4_160114_019_F01	VISp	L2/3	GABAergic	Lamp5	6	Lamp5 Lsp1	Core	4.842371135	12426.97704	0.484237113	0.484237113	0.968474227	0	0.968474227	0	0	92.97352579	0	0	768.000062	15.49558763	0	0	0	0	0
F2S4_160114_019_G01	VISp	L2/3	GABAergic	Lamp5	6	Lamp5 Lsp1	Core	3.757404435	4162.57788	0.626234073	934.3412362	0.626234073	0.626234073	0.626234073	0	0	92.68264273	0	0	739.5824396	0	0	0	0	0	0
F2S4_160114_020_B01	VISp	L2/3	GABAergic	Lamp5	6	Lamp5 Lsp1	Core	5.103785478	29831.62612	4.253154565	0	0	0	0.850630913	0	4.253154565	11.90883278	0	0	538.4493679	39.97965291	0	0	0	0	0
F2S4_160114_020_D01	VISp	L2/3	GABAergic	Lamp5	6	Lamp5 Lsp1	Core	4.747185258	28627.56162	0	0	0.678169323	0.678169323	1.356338645	0	0	162.0824681	0	0	1202.394209	0	0	0	0	0	0
F2S4_160114_021_A01	VISp	L2/3	GABAergic	Lamp5	6	Lamp5 Lsp1	Core	0	13024.03639	1.996709423	0	0	0	0	0	0.499177356	107.8223088	0	0	416.813092	0	0	0	0	0	0
F2S4_160114_021_G01	VISp	L2/3	GABAergic	Lamp5	6	Lamp5 Lsp1	Core	2.012363964	17527.01934	0.670787988	31.52703544	0.670787988	0.670787988	1.341575976	0	0.670787988	70.43273875	0	0	520.5314787	0	0	0	0	0	0
F2S4_160115_007_C01	VISp	L2/3	GABAergic	Lamp5	6	Lamp5 Lsp1	Core	4.149532555	20892.89642	0	1.18558073	0.592790365	0.592790365	0	0	0	39.12416409	0	0	729.132149	7.706274745	0.592790365	0	0	0	15.41254949
F2S4_160115_007_H01	VISp	L2/3	GABAergic	Lamp5	6	Lamp5 Lsp1	Core	4.742502844	18509.39579	2.371251422	929.5305574	0.592812856	0	0	0	0	104.3350626	0	0	929.5305574	0	20.15563709	0	0	0	0
F2S4_160115_008_C01	VISp	L2/3	GABAergic	Lamp5	6	Lamp5 Lsp1	Core	11.05010227	35802.33135	0	0	1.105010227	0	0.552505113	0	0	233.709663	0	0	440.8990805	0	0	0	0	0	0
F2S4_160115_008_H01	VISp	L2/3	GABAergic	Lamp5	6	Lamp5 Lsp1	Core	1.520532125	26155.43336	0	0	0	0	0	0	0	202.2307727	0	0	807.4025586	18.24638551	0	0	0	0	0
F2S4_160115_009_E01	VISp	L2/3	GABAergic	Lamp5	6	Lamp5 Lsp1	Core	6.782143971	11058.96396	3.16500052	1260.12235	0	0	0	0	0	44.76215021	0	0	1177.380193	0	0	0	0	0	0
F2S4_160115_010_C01	VISp	L2/3	GABAergic	Lamp5	6	Lamp5 Lsp1	Core	0.499494761	34740.85962	0.499494761	517.9760672	0	0.499494761	0.499494761	0	0	103.3954155	0	0	479.0154758	0	0.998989522	0	0	0	0
F2S4_160115_010_G01	VISp	L2/3	GABAergic	Lamp5	6	Lamp5 Lsp1	Core	1.991560761	37697.25787	0.995780381	0	0	0	0.49789019	0	0	91.11390483	0	0	1062.995556	0	1.493670571	0	0	0	0
F2S4_160115_014_E01	VISp	L4	GABAergic	Lamp5	6	Lamp5 Lsp1	Core	1.446335737	32537.34728	0.578534295	0	0.289267147	0	0.289267147	0	0.289267147	98.06156299	40.78666779	0	297.9451619	0	0	0	0	0	0
F2S4_160115_015_E01	VISp	L5	GABAergic	Lamp5	6	Lamp5 Lsp1	Core	11.68458508	18785.12294	0	2138.27907	0	0	0	0	0.614978162	20.90925751	0	0	643.8821357	8.60969427	0	0	0	0	0
F2S4_160115_017_C01	VISp	L5	GABAergic	Lamp5	6	Lamp5 Lsp1	Core	0.758590084	38113.84161	0	656.1804231	0	0	0	0	0	40.96386456	0	0	1052.164447	0	18.20616203	0	0	0	0
F2S4_160115_018_D01	VISp	L5	GABAergic	Lamp5	6	Lamp5 Lsp1	Core	3.791214051	20080.16522	2.843410538	1675.716611	0	0	0	0	0	70.13745994	0	0	915.5781933	12.32144567	19.90387377	0	0	0	0
F2S4_160115_019_D01	VISp	L5	GABAergic	Lamp5	6	Lamp5 Lsp1	Core	7.189084095	40736.54563	3.195148487	0	0.798787122	0	0	0	0	207.6846516	0	0	1032.032961	170.1416569	0	0	0	0	0
F2S4_160115_020_A01	VISp	L6	GABAergic	Lamp5	6	Lamp5 Lsp1	Core	0.77651749	809.1312245	0.77651749	1953.718005	0	0	0	0	0	95.51165126	0	0	684.8884261	0	2.32955247	0	0	0	0
F2S4_160115_021_G01	VISp	L6	GABAergic	Lamp5	6	Lamp5 Lsp1	Core	1.67907879	30635.35222	1.67907879	0	0	0.55969293	0	0	0	46.4545132	0	0	493.6491643	0.55969293	0	0	0	0	28.54433943
F2S4_160115_023_A01	VISp	L6	GABAergic	Lamp5	6	Lamp5 Lsp1	Core	0	24752.44153	0.756770256	983.0445624	0	0	0	0	0	147.5701999	0	0	742.391621	8.324472815	33.29789126	0	0	0	0
F2S4_160115_025_B01	VISp	L1	GABAergic	Lamp5	6	Lamp5 Lsp1	Core	0	19927.18274	0	27.22706007	0	0	0.756307224	0	0	99.83255358	0	0	417.4815877	0	0	0	0	0	0
F2S4_160115_025_E01	VISp	L1	GABAergic	Lamp5	6	Lamp5 Lsp1	Core	25.66055892	16134.61102	0	0	0	0	0.534594977	0	0	51.85571282	0	0	692.3004958	0	24.59136896	0	0	0	0
F2S4_160115_026_C01	VISp	L1	GABAergic	Lamp5	6	Lamp5 Lsp1	Core	1.380943668	30536.80733	0.690471834	1.380943668	0	0	0	0	0	104.2612469	0	0	852.7327149	42.8092537	0	0	0	0	0
F2S4_160115_026_E01	VISp	L1	GABAergic	Lamp5	6	Lamp5 Lsp1	Core	70.75727802	1728.999625	0	1286.241212	0	0.700567109	0	0	0	13.31077507	0	0	818.2623834	0	0	0	0	0	0
F2S4_160115_027_D01	VISp	L1	GABAergic	Lamp5	6	Lamp5 Lsp1	Core	4.632465943	33558.74141	0	3469.716991	0	1.158116486	0	0	0	488.725157	0	0	1478.914752	0	0	0	0	0	0
F2S4_160115_027_G01	VISp	L1	GABAergic	Lamp5	6	Lamp5 Lsp1	Core	0	27791.32987	0	0	0	0.924006047	0	0	0	150.6129856	0	0	503.5832954	0	0	0	0	0	0
F2S4_160115_029_B01	VISp	L1	GABAergic	Lamp5	6	Lamp5 Lsp1	Core	11.37353166	36392.45793	0	0	0.710845729	0.710845729	0	0	0	334.8083382	0	0	732.1711006	11.37353166	0	0	0	0	0
F2S4_160115_029_F01	VISp	L1	GABAergic	Lamp5	6	Lamp5 Lsp1	Core	0.621011939	29665.74032	0	1.242023878	0.621011939	0.621011939	0	0	1.242023878	360.1869246	8.694167145	0	389.9954977	0	0	0	0	0	0
F2S4_160119_002_F01	VISp	L2/3	GABAergic	Lamp5	6	Lamp5 Lsp1	Core	1.603136162	26990.9348	0.534378721	268.7924965	0	0	0	0.534378721	0	86.56935274	0	0	579.8009119	0	18.1688765	0	0	0	0
F2S4_160119_002_G01	VISp	L2/3	GABAergic	Lamp5	6	Lamp5 Lsp1	Core	3.253009305	30324.55274	0	9.759027914	0	0	1.626504652	0	0	19.51805583	0	0	508.553788	0	19.51805583	0	0	0	0
F2S4_160119_002_H01	VISp	L2/3	GABAergic	Lamp5	6	Lamp5 Lsp1	Core	0.628676974	10719.57109	0.628676974	434.4157893	0	0	0	0	0	25.77575595	0	0	617.3607889	0	0	0	0	0	0
F2S4_160119_003_A01	VISp	L2/3	GABAergic	Lamp5	6	Lamp5 Lsp1	Core	2.026821606	25735.22954	0	0	0	0	0	0	0	2.702428808	0	0	281.052596	0	0	0	0	0	0
F2S4_160119_003_C01	VISp	L2/3	GABAergic	Lamp5	6	Lamp5 Lsp1	Core	0.535730262	26310.24889	0	38.57257886	0	0	0.535730262	0	0	56.25167751	0	0	529.8372291	0	0	0	0	0	0
F2S4_160119_004_E01	VISp	L2/3	GABAergic	Lamp5	6	Lamp5 Lsp1	Core	22.67508567	42934.51889	0	0	0	0	0	0	0	55.17604181	0	0	601.6456066	10.58170665	0	0	0	0	0
F2S4_160119_005_D01	VISp	L2/3	GABAergic	Lamp5	6	Lamp5 Lsp1	Core	0	26503.85709	0	1.773782431	0	0	0	0	0	24.83295404	0	0	537.4560767	0	0	0	0	0	0
F2S4_160119_005_G01	VISp	L2/3	GABAergic	Lamp5	6	Lamp5 Lsp1	Core	0.851338432	26649.44693	0	0.851338432	0	0	0	0	0	0	0	0	458.8714147	0	0	0	0	0	0
F2S4_160119_006_E01	VISp	L1	GABAergic	Lamp5	6	Lamp5 Lsp1	Core	0	928.8063679	0	1052.409519	0	0	0	0	0	21.392853	0	0	768.9542163	0	0	0	0	0	0
F2S4_160119_007_G01	VISp	L1	GABAergic	Lamp5	6	Lamp5 Lsp1	Core	3.456320747	17132.98194	0	0	0	0	0.864080187	0	0	37.15544803	0	0	366.3699991	0	0	0	0	0	0
F2S4_160121_001_E01	VISp	L2/3	GABAergic	Lamp5	6	Lamp5 Lsp1	Core	9.539891054	10799.75292	0	988.5712105	0.596243191	0	0.596243191	0	0.596243191	38.15956422	0	0	397.0979651	0	15.50232296	0	0	0	0
F2S4_160121_004_B01	VISp	L2/3	GABAergic	Lamp5	6	Lamp5 Lsp1	Core	0.606390262	27089.87856	2.425561047	1379.537846	0.606390262	0	0	0	0	251.6519587	0	0	600.9327495	0	0	0	0	0	0
F2S4_160121_006_A01	VISp	L2/3	GABAergic	Lamp5	6	Lamp5 Lsp1	Core	0	15108.1053	0	972.3161885	0	0	0	0	0	34.39060474	0	0	765.97256	0	0	0	0	0	0
F2S4_160121_007_B01	VISp	L1	GABAergic	Lamp5	6	Lamp5 Lsp1	Core	0	2886.918247	1.523037851	865.0854995	0	0	0	0	0	201.8025153	0	0	678.5133628	0	0	0	0	0	0
F2S4_160121_008_C01	VISp	L4	GABAergic	Lamp5	6	Lamp5 Lsp1	Core	0.763915679	31830.83851	0	0.763915679	0	0.763915679	0	0	0	102.364701	0	0	449.1824192	0	0	0	0	0	0
F2S4_160121_008_E01	VISp	L4	GABAergic	Lamp5	6	Lamp5 Lsp1	Core	6.652400962	13788.20973	2.217466987	241.7039016	0	0	0	0	0	139.7004202	0	0	439.0584635	19.95720289	0	0	0	0	0
F2S4_160121_015_A01	VISp	L5	GABAergic	Lamp5	6	Lamp5 Lsp1	Core	0	41825.80699	0	0.776925922	0	0	0	0	0	66.81562926	0	0	375.2552202	50.50018491	0	0	0	0	0
F2S4_160121_015_C01	VISp	L5	GABAergic	Lamp5	6	Lamp5 Lsp1	Core	0	36376.43064	0	236.3941798	0	0	0	0	0	38.48277346	0	0	550.5392693	8.638989961	0	0	0	0	0
F2S4_160121_016_G01	VISp	L5	GABAergic	Lamp5	6	Lamp5 Lsp1	Core	1.224462308	23931.50358	0.612231154	600.5987621	0	0	0	0	0	89.99797964	0	0	380.8077778	6.12231154	22.6525527	0	0	0	0
F2S4_160121_017_B01	VISp	L6	GABAergic	Lamp5	6	Lamp5 Lsp1	Core	0	24768.79775	2.628044919	0	0	0.525608984	0	0	0	8.409743739	0	0	273.8422805	3.153653902	0	0	0	0	0
F2S4_160121_017_F01	VISp	L6	GABAergic	Lamp5	6	Lamp5 Lsp1	Core	0	19028.06155	0	0	0	0	0	0	0	62.69093478	0	0	743.5690004	13.08332552	5.451385633	0	0	0	36.52428374
F2S4_160121_019_A01	VISp	L6	GABAergic	Lamp5	6	Lamp5 Lsp1	Core	0.529218413	12779.03702	0.529218413	844.6325875	0	0	39.16216258	0	0	162.9992713	0	0	1134.115059	0	0	0	0	0	0
F2S4_160121_019_B01	VISp	L6	GABAergic	Lamp5	6	Lamp5 Lsp1	Core	0	28402.3899	1.34249001	1203.542294	0	0	0	0	0	48.32964037	0	0	556.4621092	0	0	0	0	0	0
F2S4_160121_019_G01	VISp	L6	GABAergic	Lamp5	6	Lamp5 Lsp1	Core	0	37598.78959	0	0.563505682	0	0	0	0	0	94.10544882	0	0	540.4019486	0	0	0	0	0	0
F2S4_160127_003_D01	VISp	L2/3	GABAergic	Lamp5	6	Lamp5 Lsp1	Core	0.968639333	18316.00115	0	715.3401474	0	0	0	0	0	699.3575984	0	0	739.071811	24.21598332	16.95118833	0	0	0	0
F2S4_160127_004_C01	VISp	L2/3	GABAergic	Lamp5	6	Lamp5 Lsp1	Intermediate	0	9507.589612	0	0.762009266	0	0	0	0	0	59.43672275	0	0	365.7644477	0	0	0	0	0	0
F2S4_160127_004_H01	VISp	L2/3	GABAergic	Lamp5	6	Lamp5 Lsp1	Core	0	10256.818	0	0.509680879	0	0	0	0	0	49.9487261	0	0	453.615982	2.548404393	0	0	0	0	0
F2S4_160127_006_B01	VISp	L2/3	GABAergic	Lamp5	6	Lamp5 Lsp1	Core	1.729954156	26440.61932	0.576651385	1395.496353	0	0	0.576651385	0	0	333.8811521	0	0	675.8354237	0	0	0	0	0	0
F2S4_160127_017_G01	VISp	L5	GABAergic	Lamp5	6	Lamp5 Lsp1	Core	1.468324209	41121.8878	0	0	0	0	0	0	0	27.89815997	0	0	927.9809	0	0	0	0	0	0
F2S4_160127_023_E01	VISp	L6	GABAergic	Lamp5	6	Lamp5 Lsp1	Core	1.227722213	40263.76384	0	1399.603323	0	0	0	0	0	219.7622761	0	0.613861107	746.4551056	0	14.73266656	0	0	0	0
F2S4_160128_001_H01	VISp	L2/3	GABAergic	Lamp5	6	Lamp5 Lsp1	Core	1.608482493	31006.71702	0	487.3701955	0	0	0	0	0	169.9629835	0	0	754.9144502	26.27188072	19.83795075	0	0	0	0
F2S4_160128_002_C01	VISp	L2/3	GABAergic	Lamp5	6	Lamp5 Lsp1	Core	1.956051436	34066.59182	1.304034291	128.4473777	0.652017145	0	0	0	0	129.0993948	0	0.652017145	471.4083962	0.652017145	0	0	0	0	0
F2S4_160128_003_A01	VISp	L2/3	GABAergic	Lamp5	6	Lamp5 Lsp1	Core	1.105793473	30302.61144	0	0.552896737	0	0	0	0	0	99.52141258	18.24559231	0	283.6360259	0	8.293451049	0	0	0	0
F2S4_160128_003_D01	VISp	L2/3	GABAergic	Lamp5	6	Lamp5 Lsp1	Core	0.522007579	37664.93482	0	377.9334868	0	0	0	0	0	255.7837135	0	0	514.6994724	0	5.220075785	0	0	0	0
F2S4_160128_003_H01	VISp	L2/3	GABAergic	Lamp5	6	Lamp5 Lsp1	Core	5.108043636	19259.02719	1.135120808	0.567560404	1.135120808	0.567560404	0	0	0	185.5922521	18.16193293	0	333.1579572	0	0	0	0	0	0
F2S4_160128_018_G01	VISp	L5	GABAergic	Lamp5	6	Lamp5 Lsp1	Core	0	44734.17547	0	0.609332908	0	1.218665817	0.609332908	0	0	132.834574	17.67065434	0	939.5913448	0	0	0	0	0	0
F2S4_160128_028_D01	VISp	L6	GABAergic	Lamp5	6	Lamp5 Lsp1	Core	0.590172797	21258.61431	0.590172797	2796.828884	0	0	0	0	0	132.1987065	0	0	793.1922388	0	41.31209577	0	0	0	0
F2S4_160129_022_F01	VISp	L4	GABAergic	Lamp5	6	Lamp5 Lsp1	Intermediate	2.401271713	29542.24557	0.600317928	0	0.600317928	0	0	0	0	54.02861355	371.5967977	0	659.1490854	0	0	0	0	0	0
F2S4_160129_025_C01	VISp	L2/3	GABAergic	Lamp5	6	Lamp5 Lsp1	Core	0.381574384	30033.71973	0	504.441335	0	0	0	0	0	90.05155451	0	0	495.6651242	25.18390931	0	0.381574384	0	0	0
F2S4_160129_027_D01	VISp	L2/3	GABAergic	Lamp5	6	Lamp5 Lsp1	Core	0	15456.22201	1.236893567	3395.891287	0	0	0	0	0	91.53012392	0	0	1103.927508	13.60582923	0	0	0	0	0
F2S4_160129_028_B01	VISp	L2/3	GABAergic	Lamp5	6	Lamp5 Lsp1	Core	0	30485.39469	0	1.111875216	0	0	0	0	0	92.28564297	0	0	425.2922703	0	0	0	0	0	0
F2S4_160129_029_A01	VISp	L2/3	GABAergic	Lamp5	6	Lamp5 Lsp1	Core	0	40043.30024	0	978.2739054	0	0	0.627903662	0	0	70.32521014	0	0	434.5093341	0	0	0	0	0	0
F2S4_160129_030_E01	VISp	L2/3	GABAergic	Lamp5	6	Lamp5 Lsp1	Core	0	24862.2855	0	1458.520817	0	0	0	0	0	168.9952773	0	0	784.2046857	0	0	0	0	0	0
F2S4_160303_013_B01	VISp	L5	GABAergic	Lamp5	6	Lamp5 Lsp1	Core	26.23812725	42375.20022	0.624717315	638.4610964	0	0	0	0	0	35.60888698	1.249434631	0	448.5470325	0	0	0	0	0	0
F2S4_160303_017_E01	VISp	L1	GABAergic	Lamp5	6	Lamp5 Lsp1	Core	6.549143283	43156.47273	0	1880.794875	0	0	0.595376662	0	0	197.0696751	0.595376662	0	904.9725263	0	0	0	0	0	22.0289365
F2S4_160303_017_G01	VISp	L1	GABAergic	Lamp5	6	Lamp5 Lsp1	Core	1.307937261	17011.90397	0.435979087	490.0404937	0	0	0	0	0	267.2551803	0	0	848.4153032	12.20741443	0	0	0	0	0
F2S4_160303_020_F01	VISp	L2/3	GABAergic	Lamp5	6	Lamp5 Lsp1	Core	1.095128921	12664.07085	0	0	0	0	0	0	0	22.99770735	0	0	479.6664675	0	0	0	0	0	0
F2S4_160303_020_G01	VISp	L2/3	GABAergic	Lamp5	6	Lamp5 Lsp1	Core	6.534367506	48900.59267	0	0	0	0	0	0	0	36.59245803	0	0	406.4376589	13.06873501	0	0	0	0	0
F2S4_160304_002_A01	VISp	L1	GABAergic	Lamp5	6	Lamp5 Lsp1	Core	187.1157169	5776.87559	2.061881178	1620.123136	0	8.247524712	31.95915826	0	0	97.93935595	9.278465301	0.515470294	693.3075461	0.515470294	0	0	0	0	0
F2S4_160304_003_C01	VISp	L1	GABAergic	Lamp5	6	Lamp5 Lsp1	Core	0	36251.5599	0	0.75403124	0	0	2.262093719	0	0	640.1725223	0	0	518.7734928	31.66931206	0	0	0	0	0
F2S4_160304_006_G01	VISp	L5	GABAergic	Lamp5	6	Lamp5 Lsp1	Core	1.936746817	34377.25601	0	404.2958981	0	0	0	0	0	58.10240452	0	0	616.3696746	4.357680339	0	0	0	0	0
F2S4_160304_010_F01	VISp	L6	GABAergic	Lamp5	6	Lamp5 Lsp1	Core	5.213892103	20584.44602	1.042778421	805.0249407	0	1.042778421	1.042778421	0	0	26.06946051	0	0	614.1964897	30.2405742	0	0	0	0	0
F2S4_160304_011_D01	VISp	L6	GABAergic	Lamp5	6	Lamp5 Lsp1	Core	1.424193728	42693.53013	0.474731243	951.8361418	0.474731243	0	0	0	0	13.76720604	0	0	670.3205148	19.46398095	0	0	0	0	0
F2S4_160304_012_A01	VISp	L4	GABAergic	Lamp5	6	Lamp5 Lsp1	Core	1.276733197	18732.22947	1.276733197	0.638366599	0	0	0	0	1.276733197	35.74852952	0	0	760.9329856	24.25793075	0	0	0	0	0
F2S4_160304_014_C01	VISp	L4	GABAergic	Lamp5	6	Lamp5 Lsp1	Core	0.68250767	29777.12712	0	379.4742643	0	0	0	0	0	111.2487502	0	0	873.6098172	58.01315192	0	0	0	0	0
F2S4_160304_016_A01	VISp	L2/3	GABAergic	Lamp5	6	Lamp5 Lsp1	Core	0.961820534	18799.74416	0	677.6025661	0	0.480910267	0.961820534	0	0	87.52566859	0	0	856.9820957	0	33.66371869	0	0	0	0
F2S4_160304_016_B01	VISp	L2/3	GABAergic	Lamp5	6	Lamp5 Lsp1	Core	0.569881425	5053.138593	0	1203.019688	0	0	37.61217403	0	0	152.7282218	0	0	1059.97945	0	0	0	0	0	0
F2S4_160304_017_G01	VISp	L2/3	GABAergic	Lamp5	6	Lamp5 Lsp1	Core	1.093825428	41444.31626	0	537.0682853	0	0	0	0	0	70.00482742	0	0	592.1241652	5.833735618	0	0	0	0	18.95964076
F2S4_160304_018_F01	VISp	L2/3	GABAergic	Lamp5	6	Lamp5 Lsp1	Core	5.125869384	31346.88808	2.196801165	314.8748336	0	0	1.46453411	0.732267055	0	475.9735857	0	0	431.3052953	9.519471713	0	0	0	0	0
F2S4_160304_019_B01	VISp	L2/3	GABAergic	Lamp5	6	Lamp5 Lsp1	Core	1.065135712	7562.99612	0	1083.775587	0.532567856	1.065135712	1.065135712	0	0	104.3832997	0	0	478.2459345	0	0	0	0	0	0
F2S4_160304_019_E01	VISp	L2/3	GABAergic	Lamp5	6	Lamp5 Lsp1	Core	8.687378057	10870.97608	0	148.7074715	0.511022239	0.511022239	0	0	0	24.52906746	0	0	521.2426834	16.35271164	0	0	0	0	0
F2S4_160304_021_A01	VISp	L1	GABAergic	Lamp5	6	Lamp5 Lsp1	Core	0.476823971	12335.91295	0	261.2995361	0	0	0.953647942	0	0	18.59613486	0	0	825.8591176	0	19.07295884	0	0	0	0
F2S4_160304_021_B01	VISp	L1	GABAergic	Lamp5	6	Lamp5 Lsp1	Core	2.600974715	20820.8026	0	1641.865289	0	0.650243679	0	0	0	267.9003957	0	0	819.3070353	0	56.57120006	0	0	0	31.86194026
F2S4_160304_021_D01	VISp	L1	GABAergic	Lamp5	6	Lamp5 Lsp1	Intermediate	4.641297335	59.01078041	0	2202.627107	0.663042476	0	0	0.663042476	0	0	0	0	335.4994931	0	0	0	0	0	0
F2S4_160317_009_F01	VISp	L5	GABAergic	Lamp5	6	Lamp5 Lsp1	Core	0.504875329	23215.17736	0	1047.616307	0	0	0	0	0	14.1365092	0	0	361.9956106	0	0	0	0	0	0
F2S4_160317_017_H01	VISp	L2/3	GABAergic	Lamp5	6	Lamp5 Lsp1	Core	2.73034188	34357.93963	0	44.36805555	0	0.68258547	0	0	0	58.01976494	0	0	462.1103631	0	0	0	0	0	0
F2S4_160317_021_F01	VISp	L2/3	GABAergic	Lamp5	6	Lamp5 Lsp1	Core	1.466330486	30938.84009	0	1626.893674	0	0	0	0	0	290.3334362	0	0	780.8209838	16.86280059	30.05977496	0	0	0	0
F2S4_160321_001_E01	VISp	L2/3	GABAergic	Lamp5	6	Lamp5 Lsp1	Core	2.250370608	27695.31107	0	0.562592652	1.125185304	0	0	0	0	17.44037221	0	0	354.9959634	0	0	0	0	0	0
F2S4_160321_001_F01	VISp	L2/3	GABAergic	Lamp5	6	Lamp5 Lsp1	Core	0	34827.09859	0.552162517	0.552162517	0	0	0.552162517	0	0	26.50380081	0	0	320.2542598	0	0	0	0	0	0
F2S4_160321_002_F01	VISp	L2/3	GABAergic	Lamp5	6	Lamp5 Lsp1	Core	0	27259.66177	0.874744465	0	0	0	0	0	0	122.9015974	0	0	412.0046431	0	0	0	0	0	0
F2S4_160321_006_F01	VISp	L4	GABAergic	Lamp5	6	Lamp5 Lsp1	Core	1.667253911	34530.49574	0	17.78404171	0	0	0	0	0	60.02114078	32.2335756	0	395.6949281	18.89554432	0	0	0	0	0
F2S4_160321_022_F01	VISp	L5	GABAergic	Lamp5	6	Lamp5 Lsp1	Core	0	24485.93975	0	0.828010948	0	0	0	0	0	146.1439323	0	0	744.7958477	9.522125902	0	0	0	0	4.968065688
F2S4_160330_001_B01	VISp	L2/3	GABAergic	Lamp5	6	Lamp5 Lsp1	Core	1.222976051	23100.79463	0	331.4265098	0	0	0.611488026	0	0	615.7684417	0	0	744.7924151	115.5712368	0	0	0	0	0
F2S4_160330_002_C01	VISp	L2/3	GABAergic	Lamp5	6	Lamp5 Lsp1	Core	1.049551422	18934.43242	0	555.7374778	0.524775711	0	0	0	0	153.2345076	0	0	840.6906888	0	0	0	0	0	0
F2S4_160330_003_E01	VISp	L2/3	GABAergic	Lamp5	6	Lamp5 Lsp1	Core	8.014141525	27876.04642	0.57243868	342.3183309	0.57243868	0.57243868	0.57243868	0	0	190.6220806	0	0	893.5767801	0	0	0	0	0	0
F2S4_160330_003_G01	VISp	L2/3	GABAergic	Lamp5	6	Lamp5 Lsp1	Core	1.569085255	1605.174216	0	2427.374889	0	0	0	0	0	44.98044397	0	0	614.5583914	0	0	0	0	0	0
F2S4_160330_003_H01	VISp	L2/3	GABAergic	Lamp5	6	Lamp5 Lsp1	Core	1.438947611	28367.89286	0	0.479649204	0	0	0	0	0	147.7319548	0	0	496.9165751	19.18596815	0	0	0	0	0
F2S4_160330_005_C01	VISp	L2/3	GABAergic	Lamp5	6	Lamp5 Lsp1	Core	0.592504112	20591.88791	0	991.8518835	0	0	0	0	0	212.1164721	0	0	501.2584787	13.62759458	0	0	0	0	0
F2S4_160330_005_E01	VISp	L2/3	GABAergic	Lamp5	6	Lamp5 Lsp1	Core	50.9747402	13289.23614	0	2643.404384	0.606842145	0	0	0	0	63.1115831	0	0	955.7763787	0	0	0	0	0	0
F2S4_160330_012_E01	VISp	L4	GABAergic	Lamp5	6	Lamp5 Lsp1	Core	0	28368.37299	0	0.632009379	0	0	0	0	0	127.6658946	39.1845815	0	457.5747904	52.45677846	0	0	0	0	0
F2S4_160330_021_A01	VISp	L4	GABAergic	Lamp5	6	Lamp5 Lsp1	Core	0.505455891	23151.39617	0	0.505455891	0	0	0	0	0	129.902164	0	0	556.00148	9.603661927	0	0	0	0	0
F2S4_160330_021_D01	VISp	L4	GABAergic	Lamp5	6	Lamp5 Lsp1	Core	2.634347786	28131.14626	0.526869557	68.49304242	0	1.053739114	0	0	0	65.85869464	0	0	1109.587287	15.80608671	0	0	0	0	0
F2S4_160404_001_G01	VISp	L1	GABAergic	Lamp5	6	Lamp5 Lsp1	Intermediate	2.096891044	8023.229359	0	0.524222761	0.524222761	1.048445522	0.524222761	0	0	255.8207074	0	0	538.3767757	65.00362238	0	0	0	0	0
F2S4_160404_002_D01	VISp	L1	GABAergic	Lamp5	6	Lamp5 Lsp1	Core	2.239551373	20746.08414	0	588.4421233	0	0	0	0	0	247.4704267	0	0	347.1304628	15.11697177	0	0	0	0	0
F2S4_160404_003_C01	VISp	L1	GABAergic	Lamp5	6	Lamp5 Lsp1	Core	0	6397.867789	0	317.5875517	0	0.475430467	0	0	0	50.87105993	0	0	493.4968244	16.64006633	0	0	0	0	0
F2S4_160404_005_D01	VISp	L1	GABAergic	Lamp5	6	Lamp5 Lsp1	Core	0.468820396	21215.06057	2.344101982	18.75281585	0	0	0	0	0	93.76407926	0	0	443.5040949	9.376407926	0	0	0	0	0
F2S4_160404_005_E01	VISp	L1	GABAergic	Lamp5	6	Lamp5 Lsp1	Core	0.655180479	4354.329465	5.241443834	765.9059803	0	0.655180479	0	0	0.655180479	0	0	0	245.6926797	0	0	0	0	0	0
F2S4_160404_005_F01	VISp	L1	GABAergic	Lamp5	6	Lamp5 Lsp1	Core	2.867779862	7274.410399	0.573555972	135.3592095	0	0.573555972	0	0	0	108.9756348	0	0	131.9178737	2.29422389	0	0	0	0	0
F2S4_160404_007_B01	VISp	L5	GABAergic	Lamp5	6	Lamp5 Lsp1	Core	5.322765869	23848.65248	0.887127645	353.0768026	0.443563822	0.443563822	0	0.443563822	0	31.04946757	0	0	363.7223344	0	14.63760614	0	0	0	0
F2S4_160404_008_F01	VISp	L5	GABAergic	Lamp5	6	Lamp5 Lsp1	Core	5.676976917	31855.06575	6.193065728	0	0	0.516088811	1.032177621	0	0.516088811	100.1212293	0	0	779.294104	10.32177621	0	0	0	0	0
F2S4_160404_009_F01	VISp	L5	GABAergic	Lamp5	6	Lamp5 Lsp1	Core	2.596227889	31342.70156	0.519245578	0	0	0	0.519245578	0	0	89.82948494	0	0	798.0804529	25.96227889	0	0	0	0	0
F2S4_160404_010_D01	VISp	L5	GABAergic	Lamp5	6	Lamp5 Lsp1	Core	0	29547.71774	1.415165765	0	0	0	0	0	0	126.421475	0	0	665.1279098	0.943443844	0	0	0	0	0
F2S4_160404_011_E01	VISp	L5	GABAergic	Lamp5	6	Lamp5 Lsp1	Core	0	21763.38496	2.283479347	679.1067577	0	0	0	0	0	102.2998747	0	0	427.9240296	15.07096369	27.40175216	0	0	0	0
F2S4_160404_013_G01	VISp	L2/3	GABAergic	Lamp5	6	Lamp5 Lsp1	Core	4.452776083	20266.06821	0	2373.329652	0	0.494752898	0	0	0	69.26540574	0	0	559.5655278	4.947528981	0	0	0	0	0
F2S4_160404_013_H01	VISp	L2/3	GABAergic	Lamp5	6	Lamp5 Lsp1	Core	5.097209448	25753.93391	1.132713211	0	0	0.566356605	0	0	0	16.99069816	0	0	397.0159803	0	0	0	0	0	0
F2S4_160404_017_A01	VISp	L2/3	GABAergic	Lamp5	6	Lamp5 Lsp1	Core	0.494036242	22389.22843	0	1.482108725	0	0	0	0	0	38.0407906	0	0.494036242	285.0589114	0	0	0	0	0	0
F2S4_160404_017_D01	VISp	L2/3	GABAergic	Lamp5	6	Lamp5 Lsp1	Core	3.402953991	21591.17591	0.567158998	21.55204194	0	0.567158998	0	0	0	116.2675947	0	0	739.008175	0	0	0	0	0	0
F2S4_160404_017_E01	VISp	L2/3	GABAergic	Lamp5	6	Lamp5 Lsp1	Core	3.002212631	23878.59853	1.000737544	556.4100742	0	0.500368772	0.500368772	0	0	81.05974103	0	0	533.3931107	0	0	0	0	0	0
F2S4_160404_020_H01	VISp	L2/3	GABAergic	Lamp5	6	Lamp5 Lsp1	Core	4.587217177	21252.16016	0	703.9293268	0.417019743	1.25105923	0.417019743	0	0	90.07626457	0	0	491.6662774	0	0	0	0	0	0
F2S4_160404_022_D01	VISp	L4	GABAergic	Lamp5	6	Lamp5 Lsp1	Core	3.282245187	19654.63122	0	0	0	0	0	0	0.547040864	0	2.188163458	0	820.5612967	0	0	0	0	0	0
F2S4_160404_026_F01	VISp	L6	GABAergic	Lamp5	6	Lamp5 Lsp1	Core	6.00152353	27395.24019	1.714721008	0	0	1.286040756	2.143401261	0	0	70.7322416	0	0	990.6800626	6.430203782	0	0	0	0	0
F2S4_160404_027_G01	VISp	L6	GABAergic	Lamp5	6	Lamp5 Lsp1	Core	4.529017415	28804.55076	0	202.2961112	0	0	1.006448314	0	0	165.0575236	0	0	566.630401	0	0	0	0	0	0
F2S4_160404_028_F01	VISp	L1	GABAergic	Lamp5	6	Lamp5 Lsp1	Core	1.135484281	11265.13955	0	0.567742141	0	0	0	0	0.567742141	76.07744684	0	0	397.4194984	2.838710703	0	0	0	0	0
F2S4_160404_029_E01	VISp	L1	GABAergic	Lamp5	6	Lamp5 Lsp1	Core	31.50125727	1441.028102	0	369.985355	0	0	0	0	0	52.50209545	0	0	602.2299184	0	0	0	0	0	7.412060534
F2S4_160404_030_E01	VISp	L1	GABAergic	Lamp5	6	Lamp5 Lsp1	Core	16.85684465	14672.47853	0	1531.163389	1.404737054	5.618948217	0	1.404737054	0	47.76105985	1.404737054	0	688.3211566	4.214211163	12.64263349	0	0	0	0
F2S4_160404_034_G01	VISp	L1	GABAergic	Lamp5	6	Lamp5 Lsp1	Core	7.040723073	20701.13398	0	1775.200977	0.469381538	0.469381538	0.469381538	0	0	169.4467353	0	0	1036.863818	9.857012302	23.93845845	0	0	0	0
F2S4_160404_034_H01	VISp	L1	GABAergic	Lamp5	6	Lamp5 Lsp1	Core	5.762756193	23847.17171	0.886577876	617.5014906	2.21644469	0	0.886577876	0	0	52.30809468	0	0	933.1232144	0	0	0	0	0	0
F2S4_160404_035_C01	VISp	L1	GABAergic	Lamp5	6	Lamp5 Lsp1	Core	9.155103653	5288.832957	0	266.2022447	1.408477485	3.521193713	0.704238743	0	0	59.86029312	0	0	588.03935	0	0	0	0	0	0
F2S4_160404_035_E01	VISp	L1	GABAergic	Lamp5	6	Lamp5 Lsp1	Core	9.867799678	291.1000905	3.524214171	904.3133562	1.409685668	0.704842834	0	0	2.114528502	26.07918486	0	0	485.6367127	0.704842834	0	0	0	0	0
F2S4_160404_040_E01	VISp	L5	GABAergic	Lamp5	6	Lamp5 Lsp1	Core	11.8705686	26842.43315	0	0	0	0	0	0	0	156.0759945	0	0	661.6742865	3.077554821	0	0	0	0	0
F2S4_160404_041_E01	VISp	L5	GABAergic	Lamp5	6	Lamp5 Lsp1	Core	2.35388827	36481.97275	0	46.60698775	0	0	0	0	0.470777654	38.13298998	0	0	908.6008724	0	0	0	0	0	0
F2S4_160404_042_E01	VISp	L5	GABAergic	Lamp5	6	Lamp5 Lsp1	Core	0	8006.898085	0.89818813	2506.393977	0	0	0	0	0	83.98059015	0	0	990.7015074	0	35.47843113	0	0	0	0
F2S4_160404_045_G01	VISp	L2/3	GABAergic	Lamp5	6	Lamp5 Lsp1	Core	4.802883651	24884.14044	0	235.3412989	0	0	0.400240304	0	0	174.1045324	0	0	681.2089979	2.001201521	0	0	0	0	0
F2S4_160404_047_A01	VISp	L2/3	GABAergic	Lamp5	6	Lamp5 Lsp1	Core	2.156209857	16186.12835	0.539052464	0	0	0.539052464	0	0	0.539052464	280.3072815	11.32010175	0	582.715714	7.546734501	0	0	0	0	0
F2S4_160404_047_E01	VISp	L2/3	GABAergic	Lamp5	6	Lamp5 Lsp1	Core	11.15330779	32558.98396	0	0.619628211	2.478512843	0.619628211	0.619628211	0	0	120.8275011	0	0	925.1049185	15.49070527	0	0	0	0	0
F2S4_160404_048_A01	VISp	L2/3	GABAergic	Lamp5	6	Lamp5 Lsp1	Core	1.022307778	22627.2492	0.511153889	1665.33937	0	0	0.511153889	0	0.511153889	115.009625	0	0	585.2712029	9.711923891	0	0	0	0	0
F2S4_160404_048_C01	VISp	L2/3	GABAergic	Lamp5	6	Lamp5 Lsp1	Core	5.463794168	24511.6734	2.185517667	0	0.546379417	0.546379417	0	0	0	476.9892309	0	0	775.8587718	0	0	0	0	0	0
F2S4_160404_049_C01	VISp	L2/3	GABAergic	Lamp5	6	Lamp5 Lsp1	Core	1.843605133	8281.013356	0.460901283	1004.303896	0	0.460901283	0.460901283	0	0	142.4184965	0	0	619.4513247	17.05334748	0	0	0	0	0
F2S4_160404_051_B01	VISp	L6	GABAergic	Lamp5	6	Lamp5 Lsp1	Core	1.007210621	16715.16386	0.50360531	1460.4554	0	0.50360531	0	0	0	120.3616692	0	0	909.0075853	11.07931683	0	0	0	0	0
F2S4_160404_051_D01	VISp	L4	GABAergic	Lamp5	6	Lamp5 Lsp1	Core	0	23308.00241	1.429062073	193.3997339	0	0	0	0	8.574372439	24.29405524	0	0	598.3006547	1.905416098	0	0	0	0	0
F2S4_160404_051_H01	VISp	L4	GABAergic	Lamp5	6	Lamp5 Lsp1	Core	1.572777115	23734.25519	0.524259038	0.524259038	0	1.048518077	0	0	0	152.5593802	0	0	474.9786889	15.72777115	0	0	0	0	0
F2S4_160405_003_C01	VISp	L1	GABAergic	Lamp5	6	Lamp5 Lsp1	Core	0	22707.57239	0	161.6539382	0	0	0	0	0	49.80688908	0	0	281.365233	0	0	0	0	0	0
F2S4_160405_009_E01	VISp	L1	GABAergic	Lamp5	6	Lamp5 Lsp1	Core	2.589652474	3956.98898	0	66.29510333	0	0	0	0.517930495	0	30.0399687	0	0	432.4719631	0	0	0	0	0	0
F2S4_160405_009_G01	VISp	L1	GABAergic	Lamp5	6	Lamp5 Lsp1	Core	2.464559632	15786.98318	0	536.781088	0	0	0	0	0	13.30862202	0	0	685.6404898	0	0	0	0	0	0
F2S4_160405_014_C01	VISp	L1	GABAergic	Lamp5	6	Lamp5 Lsp1	Core	0	21281.8569	0	0	0	0	0	0	0	22.98922758	25.79279192	0	237.742256	3.364277207	0	0	0	0	0
F2S4_160405_020_F01	VISp	L1	GABAergic	Lamp5	6	Lamp5 Lsp1	Core	0	8790.631535	0	62.0631992	0	0	0	0	0	18.37070696	0	0	187.6791144	0	0	0	0	0	0
F2S4_160405_024_A01	VISp	L5	GABAergic	Lamp5	6	Lamp5 Lsp1	Core	0.566119983	19603.60279	2.264479934	0	0	0	0	0	0	66.23603807	0	0	395.1517485	0	0	0	0	0	0
F2S4_160405_031_F01	VISp	L6	GABAergic	Lamp5	6	Lamp5 Lsp1	Core	9.417934992	25518.41808	0.523218611	0	1.569655832	0.523218611	0	0	0	80.57566604	0	0	791.1065393	1.046437221	0	0	0	0	0
F2S4_160405_031_G01	VISp	L6	GABAergic	Lamp5	6	Lamp5 Lsp1	Core	0.445515464	9064.012107	0.445515464	12.02891752	0.891030927	0.445515464	0.445515464	0	0	15.14752576	0	0	214.7384535	12.47443298	0	0	0	0	0
F2S4_160405_031_H01	VISp	L6	GABAergic	Lamp5	6	Lamp5 Lsp1	Core	1.023555597	26520.83729	0	1.023555597	0	0	1.023555597	0	0	88.02578132	0	0	559.8849114	0	0	0	0	0	0
F2S4_160405_032_H01	VISp	L1	GABAergic	Lamp5	6	Lamp5 Lsp1	Core	0	9711.502384	0	0	0.494349829	0	0	0	0	95.40951693	67.72592652	0	326.2708869	11.86439589	0	0	0	0	0
F2S4_160405_034_E01	VISp	L2/3	GABAergic	Lamp5	6	Lamp5 Lsp1	Core	1.020159369	21404.98389	0.510079685	0	0.510079685	17.34270928	31.11486076	0	0	58.65916373	20.91326707	0	535.5836689	3.060478108	0	0	0	0	0.510079685
F2S4_160405_034_F01	VISp	L2/3	GABAergic	Lamp5	6	Lamp5 Lsp1	Core	0.282017519	9381.876821	0	11.28070078	0.282017519	0.282017519	0.564035039	0	0	59.50569661	0	0	376.211371	3.102192714	0	0	0	0	0
F2S4_160405_035_H01	VISp	L2/3	GABAergic	Lamp5	6	Lamp5 Lsp1	Core	1.84957157	20875.18952	0	516.030468	0	0.924785785	0	0	0	118.8349734	0	0	454.0698204	0	12.94700099	0	0	0	0
F2S4_160405_037_F01	VISp	L2/3	GABAergic	Lamp5	6	Lamp5 Lsp1	Core	10.05235449	36571.83641	0	0	0.456925204	0.456925204	0.913850408	0	0	137.0775612	39.29556755	0	248.1103858	11.88005531	0	0	0	0	0
F2S4_160405_037_G01	VISp	L2/3	GABAergic	Lamp5	6	Lamp5 Lsp1	Core	4.7279692	25302.67277	0.47279692	0.47279692	0	1.41839076	0.94559384	0	0	274.6950105	0	0	481.3072646	0.47279692	0	0	0	0	0
F2S4_160405_037_H01	VISp	L2/3	GABAergic	Lamp5	6	Lamp5 Lsp1	Core	5.380172792	21998.54833	0	162.8725036	0.489106617	0.978213235	0.489106617	0	0	274.877919	0	0	483.237338	24.45533087	34.72656984	0	0	0	0
F2S4_160405_038_A01	VISp	L2/3	GABAergic	Lamp5	6	Lamp5 Lsp1	Core	1.786034018	36473.49369	0	0	0	0.446508504	0	0	0	51.79498651	0.446508504	0	790.3200528	0	0	0	0	0	0
F2S4_160405_038_H01	VISp	L2/3	GABAergic	Lamp5	6	Lamp5 Lsp1	Core	4.444261736	16067.67277	1.666598151	362.7628642	0	0	0	0	0	281.6550875	0.555532717	0	577.7540257	13.88831792	0	0	0	0	0
F2S4_160405_039_A01	VISp	L2/3	GABAergic	Lamp5	6	Lamp5 Lsp1	Core	1.889148542	26062.69328	0	0	0	0	0.629716181	0	0	26.44807959	0	0	363.3462362	0	0	0	0	0	0
F2S4_160405_039_B01	VISp	L2/3	GABAergic	Lamp5	6	Lamp5 Lsp1	Core	6.578929334	24751.02864	0	0	1.096488222	1.096488222	19.736788	0	0	245.0651177	0	0	406.2488864	0	0	0	0	0	0
F2S4_160405_042_D01	VISp	L1	GABAergic	Lamp5	6	Lamp5 Lsp1	Core	4.449702785	2784.030709	0	1254.816185	0	0	1.977645682	0	0	98.38787268	0.494411421	0	670.9162976	0	0	0	0	0	0
F2S4_160405_042_E01	VISp	L1	GABAergic	Lamp5	6	Lamp5 Lsp1	Core	0	8246.272579	0	797.2151289	0	0	0.502974845	0	0	15.59222019	0	0	871.6554059	0	0	0	0	0	0
F2S4_160413_006_H01	VISp	L1	GABAergic	Lamp5	6	Lamp5 Lsp1	Intermediate	4.267299365	3332.227392	0.533412421	0	0	0	0	0.533412421	0	52.80782964	0	0	589.4207248	0	0	0	0	0	0
F2S4_160413_008_B01	VISp	L1	GABAergic	Lamp5	6	Lamp5 Lsp1	Core	1.16931484	8732.053453	0	0.389771613	0	0.389771613	40.53624779	0	0	41.70556263	0	0	436.1544353	0	0	0	0	0	0
F2S4_160413_009_B01	VISp	L1	GABAergic	Lamp5	6	Lamp5 Lsp1	Core	2.22946352	16626.89304	0	2054.67358	0.445892704	0	0	0.445892704	0	227.405279	0.445892704	0	787.0006225	1.337678112	0	0	0	0	0
F2S4_160413_009_E01	VISp	L1	GABAergic	Lamp5	6	Lamp5 Lsp1	Core	2.15716221	19916.21582	1.294297326	909.4595877	0	0	0	0	0	53.92905525	0	0	772.6955036	12.51154082	0	0	0	0	0
F2S4_160413_009_F01	VISp	L1	GABAergic	Lamp5	6	Lamp5 Lsp1	Core	1.79872776	8748.562142	1.34904582	65.65356323	0	0	0.44968194	0	0	78.24465755	0	0	451.4806677	13.94014014	0	0	0	0	0
F2S4_160413_012_C01	VISp	L6	GABAergic	Lamp5	6	Lamp5 Lsp1	Core	0	20233.12599	2.096305973	981.4904568	0	0	0.419261195	0	0	164.7696495	0	0	669.1408667	0	24.73641049	0	0	0	0
F2S4_160413_012_G01	VISp	L6	GABAergic	Lamp5	6	Lamp5 Lsp1	Core	0.505203342	5061.127078	6.062440102	1048.296934	0	0	18.69252365	0	0	105.0822951	0	0.505203342	303.6272084	0	0	0	0	0	0
F2S4_160413_013_C01	VISp	L6	GABAergic	Lamp5	6	Lamp5 Lsp1	Core	0	22177.10758	11.63218749	0.684246323	0	0	0	0	0	83.47805143	0	0	480.3409189	0	0	0	0	0	0
F2S4_160413_013_E01	VISp	L6	GABAergic	Lamp5	6	Lamp5 Lsp1	Core	1.790719774	19539.73727	1.193813183	0	0	0	1.193813183	0	0	17.90719774	0	0	477.525273	0	0	0	0	0	0
F2S4_160413_014_G01	VISp	L6	GABAergic	Lamp5	6	Lamp5 Lsp1	Core	0.524824735	23258.13295	0.524824735	0	0	0	0.524824735	0	0.524824735	107.0642459	0	0	450.8244472	0	24.66676253	0	0	0	0
F2S4_160413_018_B01	VISp	L5	GABAergic	Lamp5	6	Lamp5 Lsp1	Core	1.364603371	32004.49773	0	0	0	0.45486779	0	0.45486779	0	53.21953148	0	0	651.8255436	0	19.55931499	0	0	0	0
F2S4_160413_020_E01	VISp	L5	GABAergic	Lamp5	6	Lamp5 Lsp1	Core	3.280708939	17954.77324	6.561417879	0	0.546784823	0	0	0	0	72.72238149	0	0.546784823	433.6003648	0	0	0	0	0	0
F2S4_160413_024_D01	VISp	L2/3	GABAergic	Lamp5	6	Lamp5 Lsp1	Core	2.538859788	19452.23592	0.507771958	133.5440248	1.015543915	1.015543915	0	0	0	143.699464	0	0	317.3574735	0	0	0	0	0	0
F2S4_160413_024_G01	VISp	L2/3	GABAergic	Lamp5	6	Lamp5 Lsp1	Core	1.608210019	19379.4668	1.072140013	449.2266654	0	0	0	0	0	146.8831818	0	0.536070006	708.1484785	0	0	0	0	0	0
F2S4_160414_002_F01	VISp	L1	GABAergic	Lamp5	6	Lamp5 Lsp1	Core	0	17772.26188	2.170472373	57.73456512	0	0.434094475	0	0	0	142.3829877	0	0	849.5228868	0	0	0	0	0	0
F2S4_160414_003_D01	VISp	L5	GABAergic	Lamp5	6	Lamp5 Lsp1	Core	5.136874592	35218.92589	0.513687459	86.8131806	0	0	0	0.513687459	0	51.88243338	0	0	523.4475209	0	0	0	0	0	0
F2S4_160414_003_G01	VISp	L5	GABAergic	Lamp5	6	Lamp5 Lsp1	Core	1.567237629	28587.45917	0	170.8289015	1.044825086	0	1.044825086	0.522412543	0	50.67401666	0	0	561.5934836	0	33.43440275	0	0	0	0
F2S4_160414_006_A01	VISp	L6	GABAergic	Lamp5	6	Lamp5 Lsp1	Core	0.983115	17607.58965	1.4746725	460.5893774	0	0.4915575	0	0	0	158.281515	0	0	432.5705999	0	0	0	0	0	0
F2S4_160414_006_D01	VISp	L6	GABAergic	Lamp5	6	Lamp5 Lsp1	Core	0	30553.35622	3.672845968	0.524692281	0	0	0	0	0	126.4508397	0	0	564.0442022	0	0	0	0	0	0
F2S4_160414_007_B01	VISp	L6	GABAergic	Lamp5	6	Lamp5 Lsp1	Core	0	32839.012	0.47938064	41.22673506	0.47938064	0	0	0.47938064	0	104.0255989	0	0	790.0192951	0	0	0	0	0	1.917522561
F2S4_160414_007_D01	VISp	L6	GABAergic	Lamp5	6	Lamp5 Lsp1	Core	0	20079.25582	3.252378534	680.6763646	0	0	0	0	0	19.0496457	0	0	407.4765678	0	5.110880554	0	0	0	0
F2S4_160414_008_A01	VISp	L1	GABAergic	Lamp5	6	Lamp5 Lsp1	Core	0	17846.52582	2.605408307	1048.416303	0	0	0	0	0.521081661	240.7397275	0.521081661	0	1021.320056	3.126489968	0	0	0	0	0
F2S4_160414_009_A01	VISp	L1	GABAergic	Lamp5	6	Lamp5 Lsp1	Core	2.800108644	8753.139622	1.680065187	625.5442711	0	0.560021729	0.560021729	0	0.560021729	103.0439981	0	0	398.1754492	0	0	0	0	0	0
F2S4_160414_010_A01	VISp	L2/3	GABAergic	Lamp5	6	Lamp5 Lsp1	Core	0.469883962	1329.771613	0	1353.735695	0	0.469883962	0	0	0	21.61466226	0	0	842.0320602	0	0	0	0	0	0
F2S4_160414_010_D01	VISp	L2/3	GABAergic	Lamp5	6	Lamp5 Lsp1	Core	0	36282.09824	0	1.002032623	0.501016312	0	0	0	0	77.15651198	0	0	224.4553076	0	0	0	0	0	0
F2S4_160414_010_G01	VISp	L1	GABAergic	Lamp5	6	Lamp5 Lsp1	Core	0.890327262	20981.00709	2.670981786	0	0	0	0	0	0.445163631	183.407416	0	0	279.5627603	0	0	0	0	0	0
F2S4_160414_011_F01	VISp	L2/3	GABAergic	Lamp5	6	Lamp5 Lsp1	Core	2.867554812	214.5886851	0	1311.428401	0	0	0.477925802	0	0	23.8962901	0	0	766.5929864	0	0	0	0	0	0
F2S4_160415_002_H01	VISp	L5	GABAergic	Lamp5	6	Lamp5 Lsp1	Core	2.58888416	22840.68939	0.517776832	814.9807335	0.517776832	0	0.517776832	0	0	12.42664397	0	0	923.1960914	0	15.53330496	0	0	0	0
F2S4_160415_005_C01	VISp	L5	GABAergic	Lamp5	6	Lamp5 Lsp1	Core	0.438617075	10139.07232	0.877234151	8.333724434	0	8.772341509	0	0	0	46.93202707	0	0	535.5514491	5.702021981	0	0	0	0	0
F2S4_160415_005_G01	VISp	L5	GABAergic	Lamp5	6	Lamp5 Lsp1	Core	2.245425955	39305.73226	1.347255573	599.0796448	0	0	0	0	0	77.69173805	0	0	870.7761854	0	0	0	0	0	0
F2S4_160415_007_F01	VISp	L5	GABAergic	Lamp5	6	Lamp5 Lsp1	Core	0	27069.96711	0.489157338	1002.772544	0	0	0	0	0	33.75185635	0	0	775.3143814	6.3590454	15.65303483	0	0	0	0
F2S4_160415_011_E01	VISp	L6	GABAergic	Lamp5	6	Lamp5 Lsp1	Core	0	13418.9118	1.852481352	0	0	0.926240676	0	0	0	10.65176778	0	0	649.7578344	0	0	0	0	0	0
F2S4_160415_012_C01	VISp	L6	GABAergic	Lamp5	6	Lamp5 Lsp1	Core	0.655911037	37951.01263	2.62364415	326.6436967	0	0	0	0	0	411.9121315	0	0	680.1797459	32.79555187	0	0	0	0	0
F2S4_160415_013_A01	VISp	L6	GABAergic	Lamp5	6	Lamp5 Lsp1	Core	1.651627679	31526.81968	4.404340478	434.3780796	0	0.55054256	1.101085119	0	0	135.4334697	0	0	497.690474	14.86464911	0	0	0	0	0
F2S4_160415_013_H01	VISp	L6	GABAergic	Lamp5	6	Lamp5 Lsp1	Core	0.798311412	25921.96985	3.193245647	1697.210061	0	0.798311412	0	0	0	19.15947388	0	0	583.565642	0	0	0	0	0	0
F2S4_160415_014_E01	VISp	L6	GABAergic	Lamp5	6	Lamp5 Lsp1	Core	2.33118274	12536.63454	0.466236548	2630.97284	0.466236548	0.466236548	0	0	0	299.3238638	0	0	707.7470797	0	53.15096646	0	0	0	0
F2S4_160415_017_F01	VISp	L1	GABAergic	Lamp5	6	Lamp5 Lsp1	Core	1.015450073	18743.68517	1.523175109	0	0	0	0	0	0	41.12572795	0	0	282.2951203	0	0	0	0	0	0
F2S4_160415_017_G01	VISp	L1	GABAergic	Lamp5	6	Lamp5 Lsp1	Core	3.872190188	4291.247215	0	242.6572518	0	0.430243354	24.52387119	0	0	34.84971169	0	0	472.8374463	0	0	0	0	0	0
F2S4_160415_018_B01	VISp	L1	GABAergic	Lamp5	6	Lamp5 Lsp1	Core	0	11133.75825	1.202739359	299.8830136	0	0	0	0	0	62.14153356	0	0	420.1569495	0	0	0	0	0	0
F2S4_160415_020_A01	VISp	L1	GABAergic	Lamp5	6	Lamp5 Lsp1	Core	1.512031233	13373.16024	0	450.5853073	1.512031233	0	0	0	0	184.4678104	0	0	663.7817111	0	0	0	0	0	0
F2S4_160415_020_G01	VISp	L1	GABAergic	Lamp5	6	Lamp5 Lsp1	Core	0	22194.84311	0	160.3504978	0	0	0	0	0	116.2033671	0	0	454.1572643	0	0	0	0	0	0
F2S4_160415_022_B01	VISp	L1	GABAergic	Lamp5	6	Lamp5 Lsp1	Intermediate	0	128.33434	0	1226.876291	0	0	0	0	0	10.69452834	0	0	480.3982129	0	0	0	0	0	0
F2S4_160415_022_E01	VISp	L1	GABAergic	Lamp5	6	Lamp5 Lsp1	Core	90.43436919	10616.99494	0.64595978	2416.535537	0	1.29191956	0.64595978	0	0	42.63334548	0	0	1212.466507	0	0	0	0	0	0
F2S4_160415_022_F01	VISp	L1	GABAergic	Lamp5	6	Lamp5 Lsp1	Core	0.588599533	5151.423116	0	161.2762721	0	0	0.588599533	0	0	15.8921874	0	0	629.2129012	21.1895832	0	0	0	0	0
F2S4_160415_022_H01	VISp	L1	GABAergic	Lamp5	6	Lamp5 Lsp1	Core	5.921948716	13259.90117	0	1285.720866	0	0	0	0	0	70.40539029	0	0	693.5259941	0	0	0	0	0	0
F2S4_160415_023_H01	VISp	L1	GABAergic	Lamp5	6	Lamp5 Lsp1	Core	2.600109413	35355.24775	0.520021883	0.520021883	1.040043765	0	0.520021883	0	0	30.68129107	10.92045953	0	674.9884035	31.72133483	0	0	0	0	0
F2S4_160419_002_F01	VISp	L1	GABAergic	Lamp5	6	Lamp5 Lsp1	Core	0	16630.46203	0.596779776	1.193559553	0	0	0	0	0	25.66153038	0	0	677.9418259	0	0	0	0	0	0
F2S4_160419_003_D01	VISp	L1	GABAergic	Lamp5	6	Lamp5 Lsp1	Core	7.917685307	24728.75837	0.609052716	1733.973082	0	0.609052716	0.609052716	0	0	252.7568771	0	0	855.7190659	0	0	0	0	0	0
F2S4_160419_004_H01	VISp	L6	GABAergic	Lamp5	6	Lamp5 Lsp1	Core	4.034370144	22427.06363	0	1805.380639	0	0	0	0	0	123.0482894	0	0	737.6173413	0	0	0	0	0	0
F2S4_160419_010_C01	VISp	L5	GABAergic	Lamp5	6	Lamp5 Lsp1	Core	14.53430066	40048.97478	0.581372026	2.325488105	2.325488105	0.581372026	0	0	0	265.105644	0	0	1037.749067	0	0	0	0	0	0
F2S4_160419_011_H01	VISp	L2/3	GABAergic	Lamp5	6	Lamp5 Lsp1	Core	5.101796789	16045.1509	0	163.8952218	0.637724599	0	0	0	0	109.0509064	0	0	631.3473526	0	0	0	0	0	0
F2S4_160419_012_E01	VISp	L2/3	GABAergic	Lamp5	6	Lamp5 Lsp1	Core	37.69344522	26343.89424	1.09256363	0.546281815	0.546281815	1.09256363	0.546281815	0	0	115.2654629	25.67524529	0	278.0574437	20.75870896	0	0	0	0	0
F2S4_160419_014_B01	VISp	L1	GABAergic	Lamp5	6	Lamp5 Lsp1	Core	0.572661594	24810.56354	0	0	0.572661594	0	0	0	0	166.0718622	0	0	557.7723922	2.863307968	0	0	0	0	0
F2S4_160419_015_F01	VISp	L6	GABAergic	Lamp5	6	Lamp5 Lsp1	Core	2.266113055	20804.0509	0	0.566528264	0	0.566528264	0.566528264	0	0	128.0353876	0	0	693.9971232	0	0	0	0	0	0
F2S4_160419_022_A01	VISp	L2/3	GABAergic	Lamp5	6	Lamp5 Lsp1	Core	0	37730.53899	0	1297.093262	0	0	0	0	0	87.46454562	0	0	645.5716463	0	0	0	0	0	0
F2S4_160419_023_E01	VISp	L2/3	GABAergic	Lamp5	6	Lamp5 Lsp1	Core	23.6731867	21408.26833	0.550539226	0	3.303235354	0.550539226	1.101078451	0	0	29.72911818	0	0	451.442165	0	0	0	0	0	0
F2S4_160422_008_G01	VISp	L2/3	GABAergic	Lamp5	6	Lamp5 Lsp1	Core	0	28864.76365	1.233536908	1359.974441	0	0	0	0	0	280.0128781	0	0	328.1208175	0	0	0	0	0	0
F2S4_160422_010_A01	VISp	L2/3	GABAergic	Lamp5	6	Lamp5 Lsp1	Core	0	12872.23832	0	0	0	0	0	0	0	0	6.140208351	0	190.3464589	0	0	0	0	0	0
F2S4_160422_010_D01	VISp	L2/3	GABAergic	Lamp5	6	Lamp5 Lsp1	Core	4.138673957	1573.878582	0	1174.200926	1.182478273	0	0.591239137	0	0	37.83930475	0	0	627.3047241	0	0	0	0	0	0
F2S4_160422_010_F01	VISp	L2/3	GABAergic	Lamp5	6	Lamp5 Lsp1	Core	0.493961323	30081.7506	1.481883968	426.7825829	0	0	0	0	0	81.00965694	0	0	478.6485218	0	0	0	0	0	0
F2S4_160429_002_D01	VISp	L1	GABAergic	Lamp5	6	Lamp5 Lsp1	Core	1.024467354	23399.34659	0.512233677	1419.399519	0	0.512233677	0	0	0	173.6472165	0	0	794.9866666	0	0	0	0	0	0
F2S4_160429_002_E01	VISp	L1	GABAergic	Lamp5	6	Lamp5 Lsp1	Core	0.472984766	8321.693967	0	856.5754106	0	0	0.472984766	0	0	104.5296332	0	0	770.965168	0	0	0	0	0	0
F2S4_160429_003_A01	VISp	L1	GABAergic	Lamp5	6	Lamp5 Lsp1	Core	1.782265125	8543.287878	1.336698844	173.3252834	0	0.445566281	0	0	0	94.46005164	0	0	585.0285274	36.98200135	0	0	0	0	0
F2S4_160429_003_C01	VISp	L1	GABAergic	Lamp5	6	Lamp5 Lsp1	Core	0.569639578	18663.67112	0.569639578	38.73549128	0	0	1.139279155	0	0	109.3707989	0.569639578	0	689.8335285	31.89981635	0	0	0	0	0
F2S4_160429_003_D01	VISp	L1	GABAergic	Lamp5	6	Lamp5 Lsp1	Intermediate	0.535897352	7608.134707	1.607692056	31.08204642	0	0	0	0.535897352	0	9.110254985	0	0	332.7922556	0	0	0	0	0	0
F2S4_160429_004_C01	VISp	L4	GABAergic	Lamp5	6	Lamp5 Lsp1	Core	0.504518976	26778.35371	1.513556929	157.4099207	0.504518976	0	0	0	0	22.19883496	0	0	871.3042724	0	0	0	0	0	0
F2S4_160429_005_C01	VISp	L5	GABAergic	Lamp5	6	Lamp5 Lsp1	Core	3.243873482	31224.1359	0.463410497	0	0.926820995	0.463410497	0.463410497	0	0	70.4383956	0	0	229.3881962	0	0	0	0	0	0
F2S4_160429_006_F01	VISp	L5	GABAergic	Lamp5	6	Lamp5 Lsp1	Core	1.452157931	42175.99089	1.452157931	0	0.484052644	0.484052644	0.484052644	0	0	18.39400046	0	0	610.3903836	0	0	0	0	0	0
F2S4_160429_006_G01	VISp	L5	GABAergic	Lamp5	6	Lamp5 Lsp1	Core	2.056336209	34270.488	0.822534484	129.1379139	0	0	0	0.411267242	0	0	0	0	767.0134061	0	0	0	0	0	0
F2S4_160429_009_C01	VISp	L1	GABAergic	Lamp5	6	Lamp5 Lsp1	Core	4.235197455	26500.68928	0	0	0.529399682	0.529399682	0.529399682	0	0	125.4677246	0	0	436.7547376	0	0	0	0	0	0
F2S4_160429_010_G01	VISp	L4	GABAergic	Lamp5	6	Lamp5 Lsp1	Core	3.762612984	22904.43621	0	6.114246099	0	0	0.470326623	0.470326623	0	49.85462204	0	0	855.0538007	3.292286361	27.74927076	0	0	0	0
F2S4_160429_011_D01	VISp	L4	GABAergic	Lamp5	6	Lamp5 Lsp1	Core	3.073548793	32026.37843	0.614709759	51.63561973	0	0.614709759	0	0	0	63.31510514	0	0	757.9371324	0	0	0	0	0	0
F2S4_160429_013_A01	VISp	L5	GABAergic	Lamp5	6	Lamp5 Lsp1	Core	1.318124809	40186.33012	0.659062405	330.1902647	0	0	0	0.659062405	0	63.26999085	0	0	564.1574184	0	0	0	0	0	0
F2S4_160429_016_D01	VISp	L2/3	GABAergic	Lamp5	6	Lamp5 Lsp1	Core	3.735267704	37921.50495	1.600829016	109.3899828	0.533609672	0	0.533609672	0	0	170.755095	0	0	495.1897756	0	0	0	0	0	0
F2S4_160429_016_F01	VISp	L2/3	GABAergic	Lamp5	6	Lamp5 Lsp1	Core	3.36185117	25441.92934	0.560308528	1591.27622	0	0	0	0	0	141.1977491	0	0	767.0623752	0	0	0	0	0	0
F2S4_160429_017_C01	VISp	L2/3	GABAergic	Lamp5	6	Lamp5 Lsp1	Core	4.97472838	30195.10885	0	436.7811517	0.994945676	0	0.994945676	0	0	520.3565885	0	0	319.377562	0	0	0	0	0	0
F2S4_160429_017_H01	VISp	L2/3	GABAergic	Lamp5	6	Lamp5 Lsp1	Core	2.017609697	34043.12842	2.017609697	0	1.513207273	0	0	0	0	82.21759517	0	0	807.043879	0	0	0	0	0	0
F2S4_160429_020_A01	VISp	L2/3	GABAergic	Lamp5	6	Lamp5 Lsp1	Core	9.09102179	29975.16498	0.413228263	0	0.413228263	0.826456526	0.413228263	0	0	128.1007616	0	0	552.8994161	0	0	0	0	0	0
F2S4_160429_020_G01	VISp	L2/3	GABAergic	Lamp5	6	Lamp5 Lsp1	Core	3.501155381	27021.33371	0	1.167051794	0	0	0	0.583525897	0	52.51733072	0	0.583525897	456.3172514	0	0	0	0	0	0
F2S4_160429_021_F01	VISp	L2/3	GABAergic	Lamp5	6	Lamp5 Lsp1	Core	3.417726494	7779.884743	0	1.708863247	0.569621082	1.139242165	1.139242165	0	0	35.31650711	0	0	644.8110652	0	0	0	0	0	0
F2S4_160502_001_C01	VISp	L2/3	GABAergic	Lamp5	6	Lamp5 Lsp1	Core	9.906592488	31832.21263	0	0.582740735	1.165481469	2.330962938	1.748222204	0	0	7.575629549	0.582740735	0	416.6596252	0	0	0	0	0	0
F2S4_160502_001_E01	VISp	L2/3	GABAergic	Lamp5	6	Lamp5 Lsp1	Core	10.51577542	24647.80916	1.168419491	1.168419491	3.505258472	2.336838981	0	0	0	19.86313134	11.68419491	0	219.6628642	14.02103389	0	0	0	0	0
F2S4_160502_002_A01	VISp	L2/3	GABAergic	Lamp5	6	Lamp5 Lsp1	Core	13.48968521	27599.89594	0.481774472	851.777266	1.445323415	1.445323415	0.481774472	0	0	297.7366235	0.481774472	0	605.590511	0	0	0	0	0	0
F2S4_160502_004_C01	VISp	L2/3	GABAergic	Lamp5	6	Lamp5 Lsp1	Core	1.467870516	7807.113986	1.957160688	1423.345111	0	0.978580344	0	0	0	65.07559289	0	0	578.3409834	0	0	0	0	0	0
F2S4_160502_004_D01	VISp	L2/3	GABAergic	Lamp5	6	Lamp5 Lsp1	Core	1.053409439	26114.01998	0.526704719	1771.307971	0	0	0	0	0	120.6153807	0	0	635.2058915	0	56.35740497	0	0	0	0
F2S4_160502_006_A01	VISp	L2/3	GABAergic	Lamp5	6	Lamp5 Lsp1	Core	1.070707947	40142.44699	1.070707947	0	0.535353973	0.535353973	0	0	0	88.86875958	0	0	854.4249415	13.91920331	0	0	0	0	0
F2S4_160502_006_B01	VISp	L2/3	GABAergic	Lamp5	6	Lamp5 Lsp1	Core	2.54062846	34492.58822	0.508125692	1415.638178	0.508125692	0	0	0	0	309.9566721	0	0	977.6338314	0	61.99133442	0	0	0	0
F2S4_160502_006_H01	VISp	L2/3	GABAergic	Lamp5	6	Lamp5 Lsp1	Core	1.761944811	23401.56367	1.174629874	0	0	0	31.12769166	0	0	49.92176965	0	0	583.2037325	0	0	0	0	0	0
F2S4_160502_007_C01	VISp	L1	GABAergic	Lamp5	6	Lamp5 Lsp1	Core	1.541961395	30899.87839	2.569935659	0.513987132	2.055948527	0.513987132	0.513987132	0	0	59.62250729	0	0	534.03263	0	0	0	0	0	0
F2S4_160502_008_H01	VISp	L1	GABAergic	Lamp5	6	Lamp5 Lsp1	Core	2.702783056	11956.57168	1.621669833	568.1249983	0.540556611	0	0	0.540556611	0	304.3333721	0	0	1039.490363	27.56838717	0	0	0	0	0
F2S4_160502_009_G01	VISp	L2/3	GABAergic	Lamp5	6	Lamp5 Lsp1	Core	3.906616245	27329.22227	0	0	0	0	0	0	0.488327031	76.66734381	0.488327031	0	315.9475888	0	0	0	0	0	0
F2S4_160502_010_F01	VISp	L2/3	GABAergic	Lamp5	6	Lamp5 Lsp1	Core	1.39526577	31223.25741	1.39526577	186.035436	0.46508859	0.46508859	0.46508859	0	0	58.60116235	0	0	425.5560599	5.581063081	0	0	0	0	0
F2S4_160502_011_H01	VISp	L2/3	GABAergic	Lamp5	6	Lamp5 Lsp1	Core	5.664663264	21034.43961	1.544908163	321.3408979	2.059877551	0.514969388	0.514969388	0	0	207.0176938	0	0	566.4663264	0	0	0	0	0	0
F2S4_160502_013_B01	VISp	L2/3	GABAergic	Lamp5	6	Lamp5 Lsp1	Core	2.296981307	22403.03293	0	1303.536892	0	0	3.445471961	0	0	141.8385957	0	0	644.877502	6.890943921	25.26679438	0	0	0	0
F2S4_160502_013_E01	VISp	L2/3	GABAergic	Lamp5	6	Lamp5 Lsp1	Core	2.67801574	21932.94891	0	0	0.535603148	0	2.142412592	0	0	11.78326926	0	0	620.7640486	0	0	0	0	0	0
F2S4_160502_013_F01	VISp	L2/3	GABAergic	Lamp5	6	Lamp5 Lsp1	Core	0.619557574	9688.021784	0	0	0	0	0.619557574	0	0	39.65168473	0	0	424.3969381	0	0	0	0	0	0
F2S4_160502_014_D01	VISp	L2/3	GABAergic	Lamp5	6	Lamp5 Lsp1	Core	0.504609863	26085.80689	0	1509.288101	0.504609863	0.504609863	0	0.504609863	0	83.76523733	0	0.504609863	582.3197824	0	64.08545265	0	0	0	0
F2S4_160502_015_E01	VISp	L6	GABAergic	Lamp5	6	Lamp5 Lsp1	Core	0	27266.70668	4.360192604	609.9424987	0	0.96893169	0.96893169	0	0	67.82521829	0	0	500.4532178	0	0	0	0	0	0
F2S4_160502_018_H01	VISp	L1	GABAergic	Lamp5	6	Lamp5 Lsp1	Intermediate	0.867010552	0.867010552	0.433505276	1440.104527	0	0.433505276	0	0	0	0	0	0	366.3119582	0	0	0	0	0	0
F2S4_160502_019_B01	VISp	L1	GABAergic	Lamp5	6	Lamp5 Lsp1	Core	0.547761818	438.2094543	0	2140.653184	0	0	0	0	0	0	0	0	1047.868357	0	0	0	0	0	0
F2S4_160502_020_A01	VISp	L1	GABAergic	Lamp5	6	Lamp5 Lsp1	Core	1.094137992	10441.35885	2.188275983	0	0	0	0	0	0	0.547068996	0	0	609.9819303	0	0	0	0	0	0
F2S4_160502_020_B01	VISp	L1	GABAergic	Lamp5	6	Lamp5 Lsp1	Intermediate	0	4330.631021	0.565061459	120.3580907	0	0	0	0.565061459	0	388.1972223	0	0	896.1874738	0	0	0	0	0	0
F2S4_160504_003_B01	VISp	L1	GABAergic	Lamp5	6	Lamp5 Lsp1	Core	3.53044123	21807.53547	1.008697494	28.74787858	1.008697494	0	1.008697494	0	0	143.2350442	23.20004237	0	368.1745854	12.10436993	0	0	0	0	0
F2S4_160504_003_D01	VISp	L1	GABAergic	Lamp5	6	Lamp5 Lsp1	Core	3.835506627	3607.293983	0.479438328	254.1023141	2.397191642	0	0.479438328	0	0	0	0	0	539.8475578	0	0	0	0	0	0
F2S4_160504_005_G01	VISp	L1	GABAergic	Lamp5	6	Lamp5 Lsp1	Core	2.144615728	13830.09067	0	400.5069872	0	0	0	0.536153932	0	183.3646447	0	0	675.0178003	0	25.1992348	0	0	0	0
F2S4_160504_007_F01	VISp	L6	GABAergic	Lamp5	6	Lamp5 Lsp1	Core	1.046268066	15813.29556	1.046268066	306.0334094	0	0	0	0	0	433.1549795	0	0	1014.880024	0	0	0	0	0	0
F2S4_160504_008_F01	VISp	L1	GABAergic	Lamp5	6	Lamp5 Lsp1	Core	2.467623545	12341.5724	0.987049418	1076.37739	0	0	0	0	0	30.59853196	0	0	803.9517511	3.454672963	0	0	0	0	0
F2S4_160504_009_A01	VISp	L1	GABAergic	Lamp5	6	Lamp5 Lsp1	Core	1.294446436	24244.98175	0	1357.011348	0	0	0	0	0	305.0578769	0	0	798.2419691	0	0	0	0	0	0
F2S4_160504_009_G01	VISp	L1	GABAergic	Lamp5	6	Lamp5 Lsp1	Core	1.056076054	7357.681871	0	2386.731883	0	0.528038027	0.528038027	0	0	182.7011574	0	0	947.3002208	0	0	0	0	0	0
F2S4_160504_010_C01	VISp	L1	GABAergic	Lamp5	6	Lamp5 Lsp1	Core	4.929597947	19937.26594	0	0.492959795	0.492959795	0.985919589	0	0	0	23.16911035	0	0	211.4797519	0	0	0	0	0	0
F2S4_160516_008_D01	VISp	L2/3	GABAergic	Lamp5	6	Lamp5 Lsp1	Core	0.58239965	24341.39336	0.58239965	860.2042825	0	0	0	0	0	100.7551394	0	0	567.8396584	0	0	0	0	0	0
F2S4_160516_010_D01	VISp	L2/3	GABAergic	Lamp5	6	Lamp5 Lsp1	Core	0	7386.102037	0	790.637653	0	0	0	0	0	41.90130148	0	0	952.7557838	0	0	0	0	0	0
F2S4_160516_011_F01	VISp	L2/3	GABAergic	Lamp5	6	Lamp5 Lsp1	Core	2.519878058	32715.57683	1.007951223	1420.707249	0	0	0.503975612	0	0	389.5731478	0	0	855.7505885	0	0	0	0	0	0
F2S4_160516_014_E01	VISp	L2/3	GABAergic	Lamp5	6	Lamp5 Lsp1	Core	8.590130513	30733.10083	1.431688419	235.7513596	0	0	0	0	0	194.2323955	37.70112836	0	422.825313	0	0	0	0	0	0
F2S4_160516_014_G01	VISp	L2/3	GABAergic	Lamp5	6	Lamp5 Lsp1	Core	0	26614.11431	1.53761782	0.512539273	0	0	0	0	0	22.03918875	18.45141384	0	317.2618102	0	0	0	0	0	0
F2S4_160516_015_C01	VISp	L2/3	GABAergic	Lamp5	6	Lamp5 Lsp1	Core	5.021920684	35966.3682	0	0	0.627740085	0	0.627740085	0	0	72.81784991	0	0	423.7245577	0	0	0	0	0	0
F2S4_160516_019_H01	VISp	L2/3	GABAergic	Lamp5	6	Lamp5 Lsp1	Core	0	25514.46295	0	1.228458217	0	0	0	0.614229109	0	48.52409959	0	0	800.3405286	0	0	0	0	0	0
F2S4_160516_021_G01	VISp	L2/3	GABAergic	Lamp5	6	Lamp5 Lsp1	Core	0	42681.25535	0	0	0	0	0	0	0	59.40124519	0	0	1346.265926	0	0	0	0	0	0
F2S4_160616_011_G01	VISp	L1	GABAergic	Lamp5	6	Lamp5 Lsp1	Core	0	962.4758422	0	108.6475797	0	0	0	0	0	141.7142344	0	0	1067.580566	0	0	0	0	0	0
F2S4_160616_012_F01	VISp	L1	GABAergic	Lamp5	6	Lamp5 Lsp1	Core	0	32892.33974	0	0.584846282	0	0	0	0	0	132.760106	0	0	549.1706587	0	0	0	0	0	0
F2S4_160802_001_A01	VISp	L1-L4	GABAergic	Lamp5	6	Lamp5 Lsp1	Core	0.828814224	22814.35473	0	1038.089815	0	0	0	0	0	135.5111256	0	0.414407112	743.4463587	0	0	0	0	0	0
F2S4_160802_001_B01	VISp	L1-L4	GABAergic	Lamp5	6	Lamp5 Lsp1	Core	1.406376134	4948.100033	0.468792045	375.0336358	0	0	0.468792045	0	0	120.4795555	23.90839428	0	438.3205619	0	0	0	0	0	0
F2S4_160802_001_F01	VISp	L1-L4	GABAergic	Lamp5	6	Lamp5 Lsp1	Core	0	24218.599	0.892736384	690.5315933	0	0	0	0	0	29.46030068	0	0	601.2579548	0	40.17313729	0	0	0	0
F2S4_160802_001_H01	VISp	L1-L4	GABAergic	Lamp5	6	Lamp5 Lsp1	Core	0.488867509	20978.28255	3.422072564	91.90709171	0.488867509	0.488867509	0	0	0	22.48790542	0	0	546.5538752	0	0	0	0	0	0
F2S4_160802_002_B01	VISp	L1-L4	GABAergic	Lamp5	6	Lamp5 Lsp1	Core	0.478441658	16528.24552	22.48675793	168.8899053	0	0	0	0.478441658	0	184.67848	0	0	545.4234902	0.478441658	0	0	0	0	0
F2S4_160802_002_C01	VISp	L1-L4	GABAergic	Lamp5	6	Lamp5 Lsp1	Core	0	35646.8039	2.801320543	0	0	0	0	0	0	99.91376602	27.54631867	0	402.9232714	0	0	0	0	0	0
F2S4_160802_002_E01	VISp	L1-L4	GABAergic	Lamp5	6	Lamp5 Lsp1	Core	4.605585347	23032.53232	10.74636581	0	0	0	0	0	0	55.26702416	0	0	254.8423892	0	0	0	0	0	0
F2S4_160802_002_F01	VISp	L1-L4	GABAergic	Lamp5	6	Lamp5 Lsp1	Core	0	14470.10882	1.87012715	231.8957666	0	0	0	0	0	171.584166	0	0	537.1940238	0	0	0	0	0	0
F2S4_160802_002_G01	VISp	L1-L4	GABAergic	Lamp5	6	Lamp5 Lsp1	Core	0	34228.7632	1.762801797	0	0	0	0	0	0	133.0915357	22.47572291	0	284.2517898	11.89891213	0	0	0	0	0
F2S4_160802_005_B01	VISp	L1-L4	GABAergic	Lamp5	6	Lamp5 Lsp1	Core	0.440528828	31783.71444	2.643172971	1383.70105	0	0	0.440528828	0	0	155.0661476	0	0.440528828	643.1720895	0	0	0	0	0	0
F2S4_160802_006_D01	VISp	L1-L4	GABAergic	Lamp5	6	Lamp5 Lsp1	Core	0	13407.47818	2.731537402	414.1010702	0	0	0.54630748	0	0	132.2064103	0	0	703.6440348	45.88982836	0	0	0	0	36.60260119
F2S4_160802_006_E01	VISp	L1-L4	GABAergic	Lamp5	6	Lamp5 Lsp1	Core	0	32735.83113	3.733178918	0	0	0	0	0.414797658	0	7.881155494	35.67259855	0	116.5581418	0	0	0	0	0	0
F2S4_160802_006_F01	VISp	L1-L4	GABAergic	Lamp5	6	Lamp5 Lsp1	Core	0.496257967	32550.55256	2.977547801	0	0	0	0	0	0	151.8549378	0	0	536.9511201	0	0	0	0	0	0
F2S4_160802_007_A01	VISp	L1-L4	GABAergic	Lamp5	6	Lamp5 Lsp1	Core	0	17976.56851	0	940.3737903	0	0	0	0	0	192.9818767	0	0.471838329	895.0773107	15.09882654	0	0	0	0	0
F2S4_160802_007_C01	VISp	L1-L4	GABAergic	Lamp5	6	Lamp5 Lsp1	Core	0.768608787	1830.826131	0.768608787	381.9985673	0.768608787	0	0	0	0	39.19904815	0	0	235.9628977	12.2977406	0	0	0	0	0
F2S4_160802_007_E01	VISp	L1-L4	GABAergic	Lamp5	6	Lamp5 Lsp1	Core	0.390843017	11464.59822	3.126744137	2089.055927	0	0	0	0	0	38.30261568	0	0	696.0914135	0	0	0	0	0	0
F2S4_160802_007_G01	VISp	L1-L4	GABAergic	Lamp5	6	Lamp5 Lsp1	Core	0	13246.93904	0.796114008	1342.646275	0	0	23.88342025	0	0	148.0772055	0	0	965.2882351	1.990285021	0	0	0	0	0
F2S4_160901_007_F01	VISp	L1-L6	GABAergic	Lamp5	6	Lamp5 Lsp1	Core	12.75936737	32341.2748	0	1088.267709	0.531640307	0	15.4175689	0	1.063280614	104.2015002	0	0	461.4637865	0	15.94920921	0	0	0	0
F2S4_160901_013_A01	VISp	L1-L6	GABAergic	Lamp5	6	Lamp5 Lsp1	Core	0	23394.99767	0	1215.351064	0	0	0	0	0	169.4224694	0	0	628.2920011	0	17.96286423	0.408246914	0	0	0
F2S4_161004_016_G01	VISp	L1-L2/3	GABAergic	Lamp5	6	Lamp5 Lsp1	Core	0	31835.05125	0	0.888502686	0	0	0	0	0	85.29625789	42.2038776	0.444251343	398.0492035	0	0	0	0	0	0
F2S4_161103_008_B01	VISp	L5-L6	GABAergic	Lamp5	6	Lamp5 Lsp1	Core	0	27685.68045	0	0.480020814	0	0	0	0.480020814	0	81.60353833	0	0	512.1822082	0	0	0	0	0	0
F2S4_170320_003_H01	VISp	L1-L6	GABAergic	Lamp5	6	Lamp5 Lsp1	Core	0	30534.99029	0	9.124214915	0	0	0	0	0	217.3710024	0	0	555.5036728	6.977340817	0	0	0	0	0
F2S4_170406_007_D01	VISp	L5-L6	GABAergic	Lamp5	6	Lamp5 Lsp1	Core	0	25118.52555	0.510996126	0	0	0	0	0	0	11.75291089	0	0	482.3803426	3.065976754	0	0	0	0	0
F2S4_170406_008_D01	VISp	L5-L6	GABAergic	Lamp5	6	Lamp5 Lsp1	Core	0	26493.92963	1.488200062	9.425267058	0	0	0	0	0	138.8986724	0	0	564.5238901	6.944933621	0	0	0	0	0
F2S4_170406_009_A01	VISp	L5-L6	GABAergic	Lamp5	6	Lamp5 Lsp1	Core	2.498238742	25813.67636	0	262.3150679	1.873679056	0	15.61399214	0	0	21.2350293	0	0	908.1097826	0	0	0	0	0	12.49119371
F2S4_170406_014_A01	VISp	L2/3-L4	GABAergic	Lamp5	6	Lamp5 Lsp1	Core	0.539358325	26434.49089	0	270.7578794	0	0.539358325	0	0	0	93.84834862	5.393583254	0	207.113597	0	0	0	0	0	0
F2S4_170406_014_C01	VISp	L2/3-L4	GABAergic	Lamp5	6	Lamp5 Lsp1	Core	0	32505.81081	0	2165.345524	0	0	0	0	0	247.5921662	0	0	1293.126103	0	0	0	0	0	0
F2S4_170406_018_G01	VISp	L2/3-L4	GABAergic	Lamp5	6	Lamp5 Lsp1	Core	2.074045498	33929.82882	0	2043.971839	0	1.037022749	0.518511375	1.037022749	0	185.1085607	0	0	792.8038917	0	0	0	0	0	0
F2S4_170412_001_D01	VISp	L1-L4	GABAergic	Lamp5	6	Lamp5 Lsp1	Core	0	33015.4552	0	0.611578527	0	0	0	0	0	74.61258029	0	0	566.321716	28.74419077	11.61999201	0	0	0	0
F2S4_170707_004_H01	VISp	L1	GABAergic	Lamp5	6	Lamp5 Lsp1	Core	2.461823276	29035.23608	0.492364655	0.98472931	0	0	0.98472931	0	0	125.0606224	0	0	441.158731	0	0	0	0	0	0
F2S4_170707_006_A01	VISp	L2/3	GABAergic	Lamp5	6	Lamp5 Lsp1	Core	0.929491559	46265.90709	0.464745779	0.929491559	0	0	6.506440912	0	0	606.0284964	77.14779938	0	296.972553	0	0	0	0	0	0
F2S4_170707_006_D01	VISp	L2/3	GABAergic	Lamp5	6	Lamp5 Lsp1	Core	2.970022376	27219.06707	0.594004475	3532.544614	0.594004475	0.594004475	23.16617453	0	0	237.0077856	0	0	1117.322418	2.376017901	0	0	0	0	0
F2S4_170707_021_D01	VISp	L1	GABAergic	Lamp5	6	Lamp5 Lsp1	Core	3.818274568	27116.62232	0	2255.07296	0	0	0	0	0	659.7978453	0	0	1324.941275	0	0	0	0	0	0
F2S4_170707_022_C01	VISp	L1	GABAergic	Lamp5	6	Lamp5 Lsp1	Core	1.271087339	30900.76875	0	0.635543669	0	0	0	0	0	71.81643465	0	0	480.4710141	0	0	0	0	0	0
F2S4_170707_028_E01	VISp	L5	GABAergic	Lamp5	6	Lamp5 Lsp1	Core	1.595832961	6965.27893	0	2095.328678	0.53194432	0	0	0	0	222.3527259	0	0	681.4206743	0	0	0	0	0	0
F2S4_170707_030_C01	VISp	L6	GABAergic	Lamp5	6	Lamp5 Lsp1	Core	2.827312289	38455.97083	0	2497.647676	0	0	1.130924916	0	0	194.5190855	0	0	1189.167549	0	0	0	0	0	0
F2S4_170707_035_G01	VISp	L2/3	GABAergic	Lamp5	6	Lamp5 Lsp1	Core	3.116813495	25286.18841	0	3383.820517	0.519468916	0	2.077875663	0	0	229.6052608	0.519468916	0	1126.728078	0	35.32388627	0	0	0	0
F2S4_170707_036_G01	VISp	L2/3	GABAergic	Lamp5	6	Lamp5 Lsp1	Core	2.219929528	60633.49019	0	41.62367866	0	0	0.554982382	0	0	93.79202257	16.09448908	0	411.2419451	4.439859057	0	0	0	0	0
F2S4_170707_037_B01	VISp	L4	GABAergic	Lamp5	6	Lamp5 Lsp1	Core	3.939952867	25944.58963	0	2539.581048	0	0	0	0	0	327.5789384	0	0	1239.396602	0	0	0	0	0	0
F2S4_170807_005_A01	VISp	L1-L4	GABAergic	Lamp5	6	Lamp5 Lsp1	Core	2.91403877	25844.60985	1.942692514	0	0	0.971346257	0	0	0	218.5529078	8.742116311	0	363.2835	0	0	0	0	0	0
F2S4_170807_007_F01	VISp	L1-L4	GABAergic	Lamp5	6	Lamp5 Lsp1	Core	1.081438833	15119.59632	2.162877665	116.7953939	0	0	0	0	1.081438833	151.4014366	68.13064646	0	550.4523659	0	0	0	0	0	0
F2S4_170807_009_C01	VISp	L1-L4	GABAergic	Lamp5	6	Lamp5 Lsp1	Core	3.050907442	36374.95246	1.016969147	0	1.016969147	0	1.016969147	0	0	524.75608	39.66179674	0	735.2686934	0	0	0	0	0	0
F2S4_170807_010_H01	VISp	L1-L4	GABAergic	Lamp5	6	Lamp5 Lsp1	Core	1.987212289	33827.32119	4.968030722	0.993606144	1.987212289	0	0.993606144	0.993606144	0	182.8235306	0	0	1344.349113	0	0	0	0	0	0
F2S4_170807_011_D01	VISp	L1-L4	GABAergic	Lamp5	6	Lamp5 Lsp1	Core	7.959449259	7483.208879	0	1871.797151	0	0	0	0	1.326574877	38.47067142	0	0	900.7443412	0	0	0	0	0	0
F2S4_170807_012_F01	VISp	L1-L4	GABAergic	Lamp5	6	Lamp5 Lsp1	Core	1.082504135	19269.65611	3.247512405	2.16500827	1.082504135	0	0	0	0	195.9332485	0	0	522.8494973	37.88764473	0	0	0	0	0
F2S4_170807_020_C01	VISp	L5-L6	GABAergic	Lamp5	6	Lamp5 Lsp1	Core	0	54952.69834	0	0	0	0	0	1.075037626	0	717.0500968	76.32767147	0	486.9920447	66.65233283	0	0	0	0	0
F2S4_170807_021_A01	VISp	L5-L6	GABAergic	Lamp5	6	Lamp5 Lsp1	Intermediate	0.95346336	8141.623634	1.906926721	0	0	0	0	0	0	32.41775425	0	0	599.7284536	15.25541376	6.674243522	0	0	0	0
F2S4_170828_003_B01	VISp	L5	GABAergic	Lamp5	6	Lamp5 Lsp1	Core	0	46984.50596	4.974010794	0	0	0	0	0	0	96.99321048	0	0	773.4586784	13.67852968	0	0	0	0	0
F2S4_170828_006_B01	VISp	L5	GABAergic	Lamp5	6	Lamp5 Lsp1	Core	0	44417.03624	5.248379563	130.1598132	0	0	0	0	0	138.5572205	0	0	779.909203	0	0	0	0	0	0
F2S4_170828_006_G01	VISp	L5	GABAergic	Lamp5	6	Lamp5 Lsp1	Core	0	36859.81261	1.046143288	1.046143288	0	0	0	0	0	61.722454	0	0	706.1467195	0	0	0	0	0	0
F2S4_170828_007_D01	VISp	L5	GABAergic	Lamp5	6	Lamp5 Lsp1	Core	1.109296795	43944.79252	0	431.5164531	0	0	0	0	0	48.80905896	0	0	747.6660395	0	0	0	1.109296795	0	0
F2S4_171003_016_B01	VISp	L5-L6	GABAergic	Lamp5	6	Lamp5 Lsp1	Core	0	52890.52301	0	46.75378856	0	0	0	0	0	117.4838789	0	0	1114.898035	0	46.75378856	0	0	0	0
F2S4_171114_001_B01	VISp	L1-L6	GABAergic	Lamp5	6	Lamp5 Lsp1	Intermediate	0	19858.87594	0	11.20387923	0	0	0	0	0	41.45435316	0	0	992.6636999	19.04659469	41.45435316	0	0	0	0
F2S4_171120_026_A01	VISp	L6	GABAergic	Lamp5	6	Lamp5 Lsp1	Core	0	45550.26385	0	458.6347785	0	0	0	0	0	15.3810444	0	0	458.6347785	0	0	0	0	0	0
F2S4_171122_010_C01	VISp	L5-L6	GABAergic	Lamp5	6	Lamp5 Lsp1	Core	0	62448.61673	0	0	0	0	0	0	0	42.28670781	0	0	905.7222766	0	0	0	0	0	0
F2S4_171122_011_A01	VISp	L5-L6	GABAergic	Lamp5	6	Lamp5 Lsp1	Core	0	13358.70264	0	12.32440099	0	0	0	0	0	66.36215916	0.948030845	0	728.0876891	0	0	0	0	0	0
F2S4_171122_011_E01	VISp	L1-L4	GABAergic	Lamp5	6	Lamp5 Lsp1	Core	0	52134.0904	0	0	0	0	0	0	0	423.0463414	116.3802184	0	520.7377656	0	0	0	0	0	0
F2S4_171122_012_E01	VISp	L1-L4	GABAergic	Lamp5	6	Lamp5 Lsp1	Intermediate	0	45239.99611	0	327.134651	0	0	0	0	0	206.4063869	0	0	733.1321196	0	0	0	0	0	0
F2S4_171122_013_E01	VISp	L1-L4	GABAergic	Lamp5	6	Lamp5 Lsp1	Core	0	13167.71214	0	0	0	0	0	0	0	73.70711894	0	0	450.6479114	0	0	0	0	0	0
F2S4_171129_007_D01	VISp	L5-L6	GABAergic	Lamp5	6	Lamp5 Lsp1	Core	0	28514.29606	0	3257.551452	0	0	0	0	0	363.714911	0	0	1861.457973	0	0	0	0	0	0
FYS4_171004_103_A01	VISp	L5	GABAergic	Lamp5	6	Lamp5 Lsp1	Core	0	25904.25387	0	1122.390659	0	0	1.088642735	0	0	91.44598971	0	0	823.0139074	0	90.35734698	0	0	0	0
F2S4_160420_015_H01	ALM	L6	GABAergic	Lamp5	7	Lamp5 Lhx6	Core	4.256861884	6136.975883	0	1241.584716	0	0	36.89280299	0	0	67.40031316	0	0	476.059054	0	0	0	0	0	0
F2S4_160517_016_H01	ALM	L6	GABAergic	Lamp5	7	Lamp5 Lhx6	Core	0.462156543	2630.132884	0	381.7413042	0	0	0	0	0	91.04483889	0	0	474.6347692	0	0	0	0	0	0
F2S4_160524_005_C01	ALM	L2/3	GABAergic	Lamp5	7	Lamp5 Lhx6	Core	2.071103753	5638.925152	0	0	1.380735836	0	0	0.690367918	0	307.2137234	0	0	967.2054528	0	0	0	0	0	0
F2S4_160525_002_E01	ALM	L1	GABAergic	Lamp5	7	Lamp5 Lhx6	Core	3.939392878	4412.557734	1.313130959	1145.050197	0.43771032	0	0	38.08079782	0	594.8483246	0	53.83836934	294.1413349	0	0	0	0	0	0
F2S4_160531_001_D01	ALM	L2/3	GABAergic	Lamp5	7	Lamp5 Lhx6	Core	3.050395585	6658.505164	0	0	0	0	0	0	0	277.5859983	67.61710214	0	920.7110675	0	0	0	0	0	0
F2S4_160531_014_F01	ALM	L6	GABAergic	Lamp5	7	Lamp5 Lhx6	Core	3.601527047	5473.120603	1.800763524	2447.237629	0	0	0.600254508	0	0	14.40610819	0	0	189.6804245	0	0	0	0	0	0
F2S4_160601_015_D01	ALM	L1	GABAergic	Lamp5	7	Lamp5 Lhx6	Core	2.660075355	4999.345621	0	617.6694973	0.532015071	1.064030142	0	0	0	163.3286268	0	0	587.3446383	0	0	0	0	0	0
F2S4_160602_012_B01	ALM	L6	GABAergic	Lamp5	7	Lamp5 Lhx6	Core	0	6421.666356	2.214558619	988.8004234	0	0	0	0	0	164.9846171	0	0	417.9979394	0	0	0	0	0	0
F2S4_160613_020_C01	ALM	L6	GABAergic	Lamp5	7	Lamp5 Lhx6	Core	47.77253019	4482.756535	0	833.9027738	15.72260487	0	0	0	0	117.9195365	0	0	18.14146716	0	0	0	0	0	0
F2S4_160623_028_D01	ALM	L2/3	GABAergic	Lamp5	7	Lamp5 Lhx6	Core	0.611038907	5885.526749	0.611038907	926.9460214	0	0.611038907	0	0	0	292.0765974	0	0	772.353178	0	0	0	0	0	0
F2S4_160629_012_A01	ALM	L1	GABAergic	Lamp5	7	Lamp5 Lhx6	Core	0	4021.277715	0	705.0112287	0	0	0	0	0	209.8972943	0.553818719	0	494.5601156	0	0	0	0	0	0
F2S4_160630_003_A01	ALM	L1	GABAergic	Lamp5	7	Lamp5 Lhx6	Core	0	3791.549516	0	1090.206286	0	0	0	0	0	85.82590595	0	0	514.4122338	0	0	0	0	0	0
F2S4_160708_003_G01	ALM	L6	GABAergic	Lamp5	7	Lamp5 Lhx6	Core	0.552534115	2447.726129	0.552534115	2210.688993	0	0	0	0	0	25.41656928	88.95799249	38.12485392	166.8653027	0	0	0	0	0	0
F2S4_161011_001_E01	ALM	L5-L6	GABAergic	Lamp5	7	Lamp5 Lhx6	Core	0	9895.839728	7.108151822	198.3820554	0	0	0.64619562	0	0	223.5836846	0	0	667.5200757	0	0	0	0	0	0
F2S4_161011_002_D01	ALM	L5-L6	GABAergic	Lamp5	7	Lamp5 Lhx6	Core	0	4972.182389	5.631807888	163.3224287	0	0	0.703975986	68.98964663	0	283.7023223	0	0	815.9081677	0	0	0	0	0	0
F2S4_161011_004_F01	ALM	L5-L6	GABAergic	Lamp5	7	Lamp5 Lhx6	Intermediate	0	14022.30726	1.75454295	30.99692546	0	0	0	0	1.75454295	12.28180065	0	0	794.2231089	0	0	0	0	0	0
F2S4_161011_005_F01	ALM	L5-L6	GABAergic	Lamp5	7	Lamp5 Lhx6	Intermediate	0	12700.03152	1.445923892	0	0	0	0	0	0.481974631	133.5069727	0	0	462.2136709	0	0	0	0	0	0
F2S4_161011_007_F01	ALM	L1-L2/3	GABAergic	Lamp5	7	Lamp5 Lhx6	Core	3.194455448	6797.162301	5.111128716	421.6681191	0.63889109	0	0	0.63889109	0	72.8335842	0	0	561.5852677	0	0	0	0	0	0
F2S4_161104_001_G01	ALM	L5-L6	GABAergic	Lamp5	7	Lamp5 Lhx6	Core	0	5380.823577	0	964.2036557	0	0	0	0	0	35.73225312	0	0	570.0145141	0	0	0	0	0	0
F2S4_161104_001_H01	ALM	L5-L6	GABAergic	Lamp5	7	Lamp5 Lhx6	Core	0	4286.948002	0	1086.514398	0	0	0	0	0	155.7888325	0	0	566.5503844	0	0	0	0	0	0
F2S4_161104_002_D01	ALM	L5-L6	GABAergic	Lamp5	7	Lamp5 Lhx6	Core	0	9443.491178	0	1071.02162	0	0	0	0	0	403.1703951	0	0	605.8250101	56.67912716	0	0	0	0	0
F2S4_161104_002_F01	ALM	L5-L6	GABAergic	Lamp5	7	Lamp5 Lhx6	Core	0	4744.064478	0	1052.926564	0	0	27.20740477	0	0	136.4904806	0	0	291.119231	0	0	0	0	0	0
F2S4_161104_002_G01	ALM	L5-L6	GABAergic	Lamp5	7	Lamp5 Lhx6	Core	0	5130.2231	0	494.6913556	0	0	0	0	0	29.81835246	0	0	637.9172125	0	0	0.48882545	0	0	0
F2S4_161104_002_H01	ALM	L5-L6	GABAergic	Lamp5	7	Lamp5 Lhx6	Core	0	8452.200709	0	450.1338445	0	0	0	0	0	64.23785072	0	0	504.9939068	0	0	0	0	0	18.28668743
F2S4_161104_003_A01	ALM	L5-L6	GABAergic	Lamp5	7	Lamp5 Lhx6	Core	0	3085.893557	0	637.7228017	0	0	0	0	0	92.73374074	0	0	74.90032906	0	0	0	0	0	0
F2S4_161104_003_B01	ALM	L5-L6	GABAergic	Lamp5	7	Lamp5 Lhx6	Core	0	6673.575406	0	268.6526238	0	0	0	0	0	192.6083894	0	0	1066.839552	0	0	0	0	0	0
F2S4_161104_003_C01	ALM	L5-L6	GABAergic	Lamp5	7	Lamp5 Lhx6	Core	0	9649.786221	0	0.657073827	0	0	0	0	0	345.6208329	0	0	775.3471157	0	0	0	0	0	0
F2S4_161104_003_G01	ALM	L1-L2/3	GABAergic	Lamp5	7	Lamp5 Lhx6	Core	0	6085.806155	0	949.2908311	0	0	0	0	0	316.430277	0	0	225.1523125	0	0	0	0	0	0
F2S4_170421_008_B01	ALM	L5-L6	GABAergic	Lamp5	7	Lamp5 Lhx6	Core	0	13388.32089	0	914.2524721	0	0	0	0	0	149.2787849	1.28136296	0	1180.135286	0	0	0	0	0	0
F2S4_170421_008_C01	ALM	L5-L6	GABAergic	Lamp5	7	Lamp5 Lhx6	Core	3.220381667	5596.37926	1.932229	152.0020147	0	1.288152667	0	0.644076333	0	46.373496	0	0	616.381051	0	0	0	0	0	0
F1S4_180108_301_B01	VISp	L1-L4	GABAergic	Lamp5	7	Lamp5 Lhx6	Core	1.304104015	1338.01072	1.304104015	143.4514417	0	0	0	0	0	431.6584291	0	0	928.5220589	0	0	0	0	0	0
F1S4_180108_301_C01	VISp	L1-L4	GABAergic	Lamp5	7	Lamp5 Lhx6	Core	1.318742763	2961.896247	1.318742763	0	0	0	0	299.3546073	0	710.8023495	40.88102567	0	605.3029284	0	0	0	0	0	0
F1S4_180108_301_H01	VISp	L1-L4	GABAergic	Lamp5	7	Lamp5 Lhx6	Core	0	1472.913907	0	0	0	0	0	29.17816773	0	751.6296007	80.53174293	0	965.2137884	0	0	0	0	0	0
F1S4_180108_303_D01	VISp	L1-L4	GABAergic	Lamp5	7	Lamp5 Lhx6	Core	0	6405.339417	1.324785815	1073.07651	0	0	0	0	0	761.7518438	206.6665872	0	951.1962154	0	0	0	0	0	0
F1S4_180108_304_H01	VISp	L1-L4	GABAergic	Lamp5	7	Lamp5 Lhx6	Core	0	10121.77053	3.290206044	35.09553113	0	0	0	1.096735348	0	749.0702426	125.0278297	0	1191.054588	0	0	0	0	0	0
F1S4_180124_309_G01	VISp	L5-L6	GABAergic	Lamp5	7	Lamp5 Lhx6	Core	0	2943.147763	0	543.1713871	0	0	0	0	0	204.9196831	0	0	837.575648	0	0	0	0	0	0
F1S4_180130_335_D01	VISp	L5-L6	GABAergic	Lamp5	7	Lamp5 Lhx6	Core	0	859.9221124	0	485.1330501	0	0	0	0	0	549.8174568	0	0	142.6861912	0	0	0	0	0	0
F2S4_151223_013_B01	VISp	L6	GABAergic	Lamp5	7	Lamp5 Lhx6	Core	0	2530.874756	0	518.8080332	0	0	0	0	0	152.590598	0	0	767.2113323	0	0	0	0	0	0
F2S4_151223_014_B01	VISp	L6	GABAergic	Lamp5	7	Lamp5 Lhx6	Core	0.764115311	2526.165219	0	1911.816508	0	0	42.02634211	0	0	269.7327048	0	0	1026.206863	0	0	0	0	0	0
F2S4_160114_003_G01	VISp	L5	GABAergic	Lamp5	7	Lamp5 Lhx6	Core	0	7426.108959	2.094615163	0	0	0	0	0	0	271.6017662	0	0	700.2996696	6.982050544	0	0	0	0	0
[truncated: 21,823 more rows]
