# Supplementary material for: Single-cell transcriptomic evidence for dense intracortical neuropeptide networks
Source: eLife. 2019 Nov 11;8:e47889. doi: 10.7554/eLife.47889 (PMC6881117; doi:10.7554/eLife.47889)
Supplement: Figure 2—source data 2. [file elife-47889-fig2-data2.csv]

sample_name	brain_region_label	brain_subregion_label	class_label	subclass_label	cluster_id	cluster_label	core_intermediate_call_label	Vipr1	Vipr2	Npy1r	Npy2r	Npy5r	Sstr1	Sstr2	Sstr3	Sstr4	Cckbr	Tacr3	Crhr1	Crhr2	Oprd1	Oprm1	Tacr1	Oprk1	Pth1r	Oprl1	Nmbr	Trhr	Trhr2	Adcyap1r1	Grpr	Ntsr1	Ntsr2	Rxfp1	Rxfp2	Rxfp3
F1S4_180124_315_E01	ALM	L1-L2/3	GABAergic	Lamp5	1	Lamp5 Krt73	Core	0	0	17.99482696	0	0	0	1.894192312	0	0	0	0	0	0	0	0	0	0	0	0	97.55090405	0	0	0	0	0	0	0	0	0
F2S4_160420_032_D01	ALM	L2/3	GABAergic	Lamp5	1	Lamp5 Krt73	Core	0	0	101.2590988	0	23.23979317	0	0	0	12.03489289	0	0	0	0	0	0	0	0	0	31.9547156	0	0	0	17.42984487	0	0	0	23.65478947	0	0
F2S4_160503_003_D01	ALM	L1	GABAergic	Lamp5	1	Lamp5 Krt73	Core	0	3.954645861	0	0	0	0	10.73403877	0	0.564949409	51.97534561	5.084544679	0	0	0	0	0	0	0	61.57948556	0	0	0	88.13210777	0	8.474241132	0	0	0	0
F2S4_160503_009_F01	ALM	L2/3	GABAergic	Lamp5	1	Lamp5 Krt73	Core	0	0	64.09828821	0	0	0	46.3800622	0	0	0	0	0	0	0	0	0	0	0	0	304.3365879	0	0	82.85876281	0	8.33798871	0	0	0	0
F2S4_160505_002_C01	ALM	L1	GABAergic	Lamp5	1	Lamp5 Krt73	Core	0	0	0	0	0	106.4345785	73.49054227	0	0	0	0	0	0	0.506831326	130.2556508	0	0	2.53415663	0	226.5536027	0.506831326	0	190.5685786	0	28.38255426	0	0	0	0
F2S4_160505_005_H01	ALM	L1	GABAergic	Lamp5	1	Lamp5 Krt73	Core	0	0	34.69688847	0	0	10.75114854	0	0	0	0	0	0	0	0	46.91410272	0	0	0	206.2265765	121.1947654	0	0	100.1811569	0	1.46606571	0	0	0	0
F2S4_160518_001_C01	ALM	L2/3	GABAergic	Lamp5	1	Lamp5 Krt73	Core	0	0	0	0	0	0	0	0	7.143562995	0.396864611	0	0	0	0	13.49339677	0	0	33.73349192	53.97358707	0	0	0	188.1138255	0	23.01814743	0	0	0	0
F2S4_160524_007_D01	ALM	L2/3	GABAergic	Lamp5	1	Lamp5 Krt73	Core	0	0	0	0	0	40.45351083	0	0	0	0	0	0	0	0	0	0	0	0	75.51322021	120.9752609	0	0	27.73955028	0	0	0	0	0	0
F2S4_160525_010_G01	ALM	L5	GABAergic	Lamp5	1	Lamp5 Krt73	Core	12.05561787	0	25.07568517	0	0	2.411123574	0	0	11.57339315	15.91341559	0	0	0	0	0	0	0	14.46674144	20.73566274	129.7184483	0	0	92.58714524	0	19.28898859	11.57339315	0	0	0
F2S4_160526_021_C01	ALM	L2/3	GABAergic	Lamp5	1	Lamp5 Krt73	Core	0	0	32.27350394	0	0	29.83776779	17.65908706	0	28.61989972	0	0	0	0	0	34.10030605	0	0	28.61989972	66.37380999	0	0	0	87.07756724	0	6.089340366	0	0	0	0
F2S4_160601_015_E01	ALM	L1	GABAergic	Lamp5	1	Lamp5 Krt73	Core	0	0	0	0.536662357	0	0	0	0	0	0	0	0	0	0	0	0	0	0	0	334.3406486	1.609987072	0	0	0	0	0	0.536662357	0	0
F2S4_160602_001_F01	ALM	L1	GABAergic	Lamp5	1	Lamp5 Krt73	Core	0	0	36.93489609	0	0	0	0.559619638	0	0	24.62326406	0	0	0	0	36.93489609	0	0	0	57.08120305	157.8127378	0	0	43.65033174	0	0	0	0	0	0
F2S4_160613_004_A01	ALM	L1	GABAergic	Lamp5	1	Lamp5 Krt73	Core	11.18983489	0	0	0	0	0	0	0	16.45563955	0	0	0	0	0	39.49353491	0	0	0	0	102.6831908	0	0	50.02514422	0	0.658225582	0	0	0	0
F2S4_160620_013_F01	ALM	L2/3	GABAergic	Lamp5	1	Lamp5 Krt73	Core	0	0	10.39564256	0	0	0	0	0	0	35.86496684	0	0	0	0	0	0	0	0	4.678039153	0	0	0	0	0	0	0	0	0	0
F2S4_160629_013_C01	ALM	L1	GABAergic	Lamp5	1	Lamp5 Krt73	Core	0	0	49.76835095	0	0	0	3.518974309	0	0	0	0	0	0	0	0	0	0	0	0	0	25.13553078	0	129.6993388	0	0	0	0	0	0
F2S4_160629_014_C01	ALM	L1	GABAergic	Lamp5	1	Lamp5 Krt73	Core	0	0	80.77306371	0	18.01021015	0	46.38993524	0	0	0	0	0	0	0	0	0	0	0	0	0	16.37291832	0	1.091527888	0	0	0	0	0	0
F2S4_160629_014_G01	ALM	L1	GABAergic	Lamp5	1	Lamp5 Krt73	Core	0	0	51.12781955	0	0	0.601503759	68.57142857	0	0	0	0	0	0	0	4.210526316	0	0	0	0	185.8646617	0	0.601503759	138.3458647	0	0	0	0	0	0
F2S4_160707_002_H01	ALM	L1	GABAergic	Lamp5	1	Lamp5 Krt73	Core	0	0	34.19218774	0	0	0	0	0	0	0.727493356	0	0	0	0	2.182480069	0	0	0	2.182480069	480.8731084	0	0	130.2213108	0	0	0	0	0	0
F2S4_160707_005_A01	ALM	L1	GABAergic	Lamp5	1	Lamp5 Krt73	Core	0	0	144.5110329	0	0	0	20.92467444	0	0	33.34869989	0	0	0	0	0	0	0	0	0	255.6733658	0	0	113.1240212	0	0	0	0	0	0
F2S4_160707_006_E01	ALM	L1	GABAergic	Lamp5	1	Lamp5 Krt73	Core	0	0	0.613837367	0	0	0	0	0	21.48430786	0	0	0	0	0	28.85035627	0	0	0	0	251.6733207	0	0	86.55106881	0	0	0	0	0	0
F2S4_160819_009_D01	ALM	L1	GABAergic	Lamp5	1	Lamp5 Krt73	Core	0	0	0	0	0	0	0	0	0	0	0	0	0	0	0	0	0	0	0	44.99162464	0	0	28.26396932	0	0	0	0	0	0
F2S4_160819_014_F01	ALM	L1	GABAergic	Lamp5	1	Lamp5 Krt73	Core	0	0	149.0864794	0	0	31.44369383	0	0	22.22743874	0	0	0	0	0	32.52795914	0	0	19.51677548	0	80.23563254	0	0	57.46606114	0	0	0	0	0	0
F2S4_160819_014_H01	ALM	L1	GABAergic	Lamp5	1	Lamp5 Krt73	Core	2.486005035	0	0	0	0	2.983206042	71.09974399	0	0	0	0	0	0	0	21.8768443	0	0	0	33.31246746	61.15572385	0	0	103.9150104	0	0	0	0	0	0
F2S4_160819_016_C01	ALM	L1	GABAergic	Lamp5	1	Lamp5 Krt73	Core	0	0	0	0	0	0	0	0	13.32121444	0	0	0	0	0	0	0	0	0	20.49417607	236.7077336	0	0	5.123544017	0	6.660607222	0	0	0	0
F2S4_180122_002_D01	ALM	L1-L2/3	GABAergic	Lamp5	1	Lamp5 Krt73	Core	0	0	0	0	49.65479126	0	0	0	0	43.17807935	0	0	0	0	0	0	0	11.87397182	25.90684761	0	0	0	35.62191547	0	1.079451984	0	0	0	0
F2S4_180122_003_G01	ALM	L1-L2/3	GABAergic	Lamp5	1	Lamp5 Krt73	Core	0	0	0	0	0	0	0	0	0	0	0	0	0	0	94.39416644	0.907636216	0	0	0	0	0	0	70.79562483	0	0	0	0	0	0
F2S4_180122_011_D01	ALM	L1-L2/3	GABAergic	Lamp5	1	Lamp5 Krt73	Core	0	0	0	0	0	18.14960047	0	0	0	50.62783289	0	0	0	0	0	0	0	0	53.49355928	37.25444307	0	0	92.65848661	0	0	0	0	0	0
F1S4_160108_001_H01	VISp	L2/3	GABAergic	Lamp5	1	Lamp5 Krt73	Core	0	0	46.48123082	0	0	24.08063766	0	0	1.120029658	0	0	0	0	0	27.44072663	0	0	0	77.28204643	35.28093424	0	0	132.1634997	0	19.60051902	0	0	0	0
F1S4_160108_004_A01	VISp	L2/3	GABAergic	Lamp5	1	Lamp5 Krt73	Core	0	0	60.80416655	0	0	0.52417385	0	0	0	0	0	0	0	0	0	0	0	0	272.5704018	136.8093747	0	0	27.78121403	0	0	0	0	0	0
F1S4_160108_005_G01	VISp	L1	GABAergic	Lamp5	1	Lamp5 Krt73	Core	0	0	0	0	0	102.129643	67.85795069	0	0	0	0	0	0	0	26.04648612	0	0	45.23863379	0	1.370867691	0	0	45.23863379	0	0	0	0	0	0
F1S4_160108_006_B01	VISp	L1	GABAergic	Lamp5	1	Lamp5 Krt73	Core	0	0	0	0	0	0	0	0	0	0	0	0	0	0	41.15393276	0	0	0	0	104.0606585	0	0	87.59908544	0	1.17582665	0	0	0	0
F1S4_180124_303_D01	VISp	L1-L4	GABAergic	Lamp5	1	Lamp5 Krt73	Core	0	0	0	0	0	0	46.29539135	0	0	0	0	0	0	0	0	0	0	55.55446961	0	0	0	0	73.04383968	0	64.81354788	0	0	0	0
F1S4_180124_307_D01	VISp	L1-L4	GABAergic	Lamp5	1	Lamp5 Krt73	Core	0	0	42.7986846	0	0	6.114097799	42.7986846	0	0	0	0	0	0	0	0	0	0	0	0	49.78622494	0	0	90.83802445	0	0	0	0	0	0
F1S4_180124_313_D01	VISp	L1-L4	GABAergic	Lamp5	1	Lamp5 Krt73	Core	0	0	0	0	0	0	93.37430709	0	48.07390068	0	0	0	0	0	9.2449809	0	0	0	0	0	0	0	21.26345607	0	0	0	0	0	0
F2S4_151223_018_C01	VISp	L1	GABAergic	Lamp5	1	Lamp5 Krt73	Core	0	0	0	0	0	31.36936774	0	0	47.4188117	0	0	0	0	0	15.31992378	0	0	0	29.1808072	85.35386106	0	0	213.0198926	0	2.91808072	0	0	0	0
F2S4_160114_010_F01	VISp	L1	GABAergic	Lamp5	1	Lamp5 Krt73	Core	0	0	0	0	103.2915355	111.6318459	14.11437132	0	0	0	0	0	0	0	49.40029961	0	0	0	103.9330979	0	0	0	134.7280898	0	0	0	0	0	0
F2S4_160114_011_E01	VISp	L1	GABAergic	Lamp5	1	Lamp5 Krt73	Core	0	0	0	0	0	0	0	0	0	0	0	0	0	0	49.95322562	0	0	37.2378591	70.84275633	0	0	0	37.2378591	0	0	0	0	0	0
F2S4_160119_006_B01	VISp	L1	GABAergic	Lamp5	1	Lamp5 Krt73	Core	0	0	0	0	0	0	99.59524283	0	45.31847028	0	0	0	0	0	0	0	0	0	164.4111945	0	0	0	74.3012129	0	0	0	0	0	0
F2S4_160303_018_E01	VISp	L1	GABAergic	Lamp5	1	Lamp5 Krt73	Core	0	0	0	0	0	33.5770412	0	0	0	0	0	0	0	0	175.1273129	0	0	30.94354778	0	0	0	0	30.94354778	0	0	0	1.316746714	0	0
F2S4_160304_017_C01	VISp	L2/3	GABAergic	Lamp5	1	Lamp5 Krt73	Core	0	0	0	0	0	0	0	0	0	0	0	0	0	0	0	0	0	0	0	1.856302394	0	0	26.60700098	0	0	0	0	0	0
F2S4_160404_004_C01	VISp	L1	GABAergic	Lamp5	1	Lamp5 Krt73	Core	8.228568331	0	0	0	0	4.840334312	61.47224577	0	0	0	0	0	0	0	7.7445349	0	0	0	49.85544342	56.63191145	0	0	44.53107567	0	9.680668624	0	0	0	0
F2S4_160404_004_E01	VISp	L1	GABAergic	Lamp5	1	Lamp5 Krt73	Core	0	0	0	0	43.49759991	0	0	0	0	0	0	0	0	0	141.7179868	0	0	0	10.75747095	48.64247732	0	0	120.6707611	0	0	0	0	0	0
F2S4_160404_004_F01	VISp	L1	GABAergic	Lamp5	1	Lamp5 Krt73	Core	0	0	90.48905104	0	0	0	59.1984446	0	0	0	0	0	0	0	0.845692066	0	0	0	48.20444775	31.29060643	0	0	10.57115082	0	0	0	0	0	0
F2S4_160404_013_E01	VISp	L2/3	GABAergic	Lamp5	1	Lamp5 Krt73	Core	0	0	0	0	0	0	8.174334022	0	21.45762681	0	0	0	0	0	29.63196083	0	0	0	0	0	0	0	0	0	47.00242062	0	0	0	0
F2S4_160404_031_D01	VISp	L1	GABAergic	Lamp5	1	Lamp5 Krt73	Core	0	0	0	0	0	8.918865604	0	0	26.75659681	0	0	0	0	0	23.08412274	0	0	0	148.4728804	58.75958516	0	0	0	0	0	0	0	0	0
F2S4_160404_045_A01	VISp	L2/3	GABAergic	Lamp5	1	Lamp5 Krt73	Core	0	0	0	0	23.55494556	0	0	0	16.91974963	0	0	0	0	0	7.962235119	0	0	0	20.90086719	0	0	0	55.73564583	0	0	23.22318576	0	0	0
F2S4_160404_046_E01	VISp	L2/3	GABAergic	Lamp5	1	Lamp5 Krt73	Core	0	0	0	0	0	0	21.94866062	0	0	0	0	0	0	0	65.84598186	0	0	7.316220207	0	0	0	0	58.52976165	0	0	0	0	0	0
F2S4_160405_034_D01	VISp	L2/3	GABAergic	Lamp5	1	Lamp5 Krt73	Core	0	0	5.966218188	0	5.423834716	9.220519018	0	0	0	0	0	0	0	0	61.28933229	0	0	0	42.84829426	0	0	0	0	0	0	0	0	0	0
F2S4_160405_044_G01	VISp	L1	GABAergic	Lamp5	1	Lamp5 Krt73	Core	0	0	3.412706383	0	0	37.05224073	0	0	0	0	0	0.487529483	0	0	7.800471734	0	0	0	0	6.825412767	0	0	103.3562505	0	0	0	0	0	0
F2S4_160406_001_H01	VISp	L2/3	GABAergic	Lamp5	1	Lamp5 Krt73	Core	0	0	0	0	0	0	3.628038936	0	30.06089404	0	0	0	0	0	0	0	0	0	0	8.810951702	0	0	50.27425383	0	33.68893298	0	0	0	0
F2S4_160413_007_C01	VISp	L1	GABAergic	Lamp5	1	Lamp5 Krt73	Core	0	0	175.123813	0	0	0	0	0	0	48.19131954	0	0	0	0	0	0	0	0	77.45033497	0	0	0	85.19536847	0	0	0	15.05978736	0	0
F2S4_160413_010_A01	VISp	L1	GABAergic	Lamp5	1	Lamp5 Krt73	Core	0	0	0	0	0	0	0	0	22.44367573	0	0	0	0	0	25.76866472	0	0	0	53.61544757	0	0	0	108.0621424	0	38.65299708	0	0	0	0
F2S4_160414_009_E01	VISp	L1	GABAergic	Lamp5	1	Lamp5 Krt73	Core	0	0	0	41.68299674	0	10.16658457	27.44977834	0	23.89147374	0	0	0	0	0	17.791523	0	0	0	0	165.7153285	0	0	40.66633829	0	16.26653531	0	0	0	0
F2S4_160415_021_H01	VISp	L1	GABAergic	Lamp5	1	Lamp5 Krt73	Core	0	0	71.64838555	50.75093976	1.990232932	2.985349398	0	0	0	0	0	0	0	0	14.92674699	0	0	0	127.3749076	0	0	0	168.1746827	0	0	0	0	0	0
F2S4_160419_002_D01	VISp	L1	GABAergic	Lamp5	1	Lamp5 Krt73	Core	0	0	40.23505185	48.80973504	0	18.46854839	54.08646315	0	17.80895738	31.66036867	0	0	0	0	16.48977535	0	0	0	37.5966878	0	0	0	232.1760369	0	0	0	0	0	29.02200462
F2S4_160429_007_F01	VISp	L1	GABAergic	Lamp5	1	Lamp5 Krt73	Intermediate	0	0	47.83264723	0	0	0.854154415	0	0	0	0	0	0	0	0	26.90586407	0	0	0	1.70830883	0	0	0	81.14466941	0	0	0	0.427077207	0	0
F2S4_160429_008_G01	VISp	L1	GABAergic	Lamp5	1	Lamp5 Krt73	Core	0	0	0	0	0	0	0	0	0	0	0	0	0	0	19.43581007	0	0	0	0	0	0	0	39.32361573	0	0	0	0	0	0
F2S4_160429_009_A01	VISp	L1	GABAergic	Lamp5	1	Lamp5 Krt73	Core	0	0	23.87887389	0	0	20.76423817	44.64311206	0	0	0	0	0	0	0	3.633741679	0.519105954	0	0	59.17807878	126.6618528	0	0	93.43907176	0	0	0	0	0	0
F2S4_160502_008_D01	VISp	L2/3	GABAergic	Lamp5	1	Lamp5 Krt73	Core	0	0	0	0	38.39155107	13.08802877	22.68591654	0	4.798943883	0	0	0	0	0	14.83309928	0	0	27.48486042	47.98943883	34.90141006	0	0	84.19965177	0	7.416549638	0	0	0	0
F2S4_160502_010_B01	VISp	L2/3	GABAergic	Lamp5	1	Lamp5 Krt73	Core	0	0	0	0	0	0	0	0	0	0	0	0	0	0	0	0	0	0	77.01282967	0	0	0	99.37139313	0	0	0	0	0	0
F2S4_160504_004_C01	VISp	L1	GABAergic	Lamp5	1	Lamp5 Krt73	Core	0	0	0	0	0	9.502308222	33.53755843	0	0	0	0	0	0	0	0	0	0	0	9.502308222	210.7276588	0	0	166.0109142	0	0	0	0	0	0
F2S4_170526_002_A01	VISp	L1-L4	GABAergic	Lamp5	1	Lamp5 Krt73	Core	0	0	0	77.57689281	0	3.17360016	0	0	0	0	0	0	0	0	0	0	0	0	76.87164833	0	0	0	32.79386832	0	0	0	0	0	0
F2S4_170526_002_H01	VISp	L1-L4	GABAergic	Lamp5	1	Lamp5 Krt73	Core	0	0	0	0	0	0	42.12205286	0	8.986037944	27.5197412	0	0	0	0	2.246509486	0	0	0	125.8045312	79.18945938	0	0	67.95691195	0	0	0	0	0	0
F2S4_170526_007_C01	VISp	L1-L4	GABAergic	Lamp5	1	Lamp5 Krt73	Core	0	0	0	0	49.34681458	0	0	0	0	48.19921424	0	0	0	0	13.1974039	0	0	0	117.6290347	0	0	0	11.47600339	0	0	19.50920576	0.57380017	0	0
F2S4_170526_008_D01	VISp	L1-L4	GABAergic	Lamp5	1	Lamp5 Krt73	Core	0	0	0	0	0	0	0	0	0	0	0	0	0	0	0	0	0	0	0	0	0.438793563	0	0.438793563	0	0	0	0	0	0
F2S4_170526_012_D01	VISp	L1-L4	GABAergic	Lamp5	1	Lamp5 Krt73	Core	0	0	0	0	0	0	0	0	6.665026666	0	0	0	0	0	0	0	0	0	86.64534666	99.36948848	0	0	53.92612484	0	0	0	0	0	0
F2S4_170526_014_A01	VISp	L1-L4	GABAergic	Lamp5	1	Lamp5 Krt73	Core	0	0	44.39827024	0	0	13.05831478	37.60794656	0	0	0	0	0	0	0	88.2742079	0	0	0	38.65261174	0	0	0	40.21960951	0	2.089330364	0	0	0	0
F2S4_170526_014_E01	VISp	L1-L4	GABAergic	Lamp5	1	Lamp5 Krt73	Core	0	0	0	0	0	0	0	4.137411718	0	4.728470535	0	0	0	0	34.28141138	0	0	0	0	40.19199955	0	0	70.92705802	0	33.69035256	0	0	0	0
F1S4_180124_315_A01	ALM	L1-L2/3	GABAergic	Lamp5	2	Lamp5 Fam19a1 Pax6	Core	0	0	112.1411483	0	0	0	0	0	0	0	0	0	0	0	0	0	0	0	0	27.4122807	0	0	41.53375864	0	0	0	93.03561935	0	0
F2S4_160505_002_H01	ALM	L1	GABAergic	Lamp5	2	Lamp5 Fam19a1 Pax6	Core	0	0	229.8391061	0	96.36313797	0	85.29439915	0	0	0	0	0	0	0	159.5200595	0	0	0	0	0	0	0	255.2320952	0	0	0	364.6172788	0	11.7198411
F2S4_160505_012_C01	ALM	L2/3	GABAergic	Lamp5	2	Lamp5 Fam19a1 Pax6	Core	0	0	92.68884712	0	51.72140088	0	41.9916324	0	0	0	0	0	0	0	7.169303093	0	0	0	0	0	0	0	99.34605714	0	0	0	258.0949113	0	0
F2S4_160506_003_G01	ALM	L2/3	GABAergic	Lamp5	2	Lamp5 Fam19a1 Pax6	Core	0	0	123.384168	0	36.25762831	0	0	0	19.48171073	0	0	0	0	0	15.69360031	0	0	0	67.64482893	12.98780715	0	0	11.36433126	0	0	0	133.1250233	0	0
F2S4_160523_001_C01	ALM	L1	GABAergic	Lamp5	2	Lamp5 Fam19a1 Pax6	Core	0	0	16.66608403	0	77.63956219	0	0	0	0	0	0	0	0	0	55.2826202	0	0	0	0	0	0	0	11.38171592	0	0	0	231.2927272	0	0.406489854
F2S4_160523_002_H01	ALM	L2/3	GABAergic	Lamp5	2	Lamp5 Fam19a1 Pax6	Core	0	0	130.4500108	0	0	0	0	0	0	0	0	0	0	0	33.05924932	0	0	22.33733062	10.42408762	0	0	0	244.8171436	0	0	0	379.7346206	0	49.14212737
F2S4_160524_008_F01	ALM	L1	GABAergic	Lamp5	2	Lamp5 Fam19a1 Pax6	Core	0	0	89.86885417	443.0743508	2.786631137	0	50.85601825	0	0	0	0	0	0	0	36.92286257	0	0	0	52.94599161	0	0	0	202.7274152	0	0	0	397.7915948	0	0
F2S4_160525_021_B01	ALM	L1	GABAergic	Lamp5	2	Lamp5 Fam19a1 Pax6	Core	0	0	202.1048517	0	0	29.61243248	119.1900407	0	0	0	0	0	0	0	0	0	0	0	0	0	0	0	246.5235004	0	0	0	562.6362172	0	0
F2S4_160526_008_G01	ALM	L1	GABAergic	Lamp5	2	Lamp5 Fam19a1 Pax6	Core	0	0	164.0641747	49.46658532	45.34436988	0	35.86327436	0	0	0	0	0	0	0	105.5287154	0	0	0	12.77886787	0	0	0	177.2552641	0	0	40.39771135	428.7104061	0	23.49662803
F2S4_160526_020_A01	ALM	L2/3	GABAergic	Lamp5	2	Lamp5 Fam19a1 Pax6	Core	0	0	212.9963084	0	0	0	0	0	0	0	0	0	0	0	0	0	0	0	0.981549808	2.453874521	0	0	64.78228734	0	0	0	45.64206608	0	0
F2S4_160531_008_B01	ALM	L1	GABAergic	Lamp5	2	Lamp5 Fam19a1 Pax6	Core	0	0	228.156019	0	61.08524995	0	0	0	0	0	0	0	0	0	0	0	0	7.309346148	98.15407684	0	0	0	99.19826915	0	0	8.353538454	133.6566153	0	0
F2S4_160531_019_A01	ALM	L1	GABAergic	Lamp5	2	Lamp5 Fam19a1 Pax6	Intermediate	0	0	170.5427648	0	76.6609171	0	73.88334764	0	0	0	0	0	0	0	43.33008358	0	0	0	53.88484753	0	0	0	141.1005286	0	0	0	226.6496679	0	49.44073639
F2S4_160531_020_H01	ALM	L1	GABAergic	Lamp5	2	Lamp5 Fam19a1 Pax6	Core	0	0	183.5349075	0	39.59828483	0	42.74100585	0	0	0	0	0	0	0	0	0	0	0	16.9706935	0	0	0	93.65308634	0	0	0	215.5906618	0	0
F2S4_160602_002_G01	ALM	L1	GABAergic	Lamp5	2	Lamp5 Fam19a1 Pax6	Core	0	0	167.7537997	0	0	0	31.12957107	0	0	0	0	0	0	0	6.341208923	0	0	0	0	0	0	0	142.388964	0	0	0	326.8604963	0	38.62372707
F2S4_160613_004_G01	ALM	L1	GABAergic	Lamp5	2	Lamp5 Fam19a1 Pax6	Core	0	0	300.0721809	0	0	40.38450135	0.51119622	0	0	0	0	0	0	0	38.33971647	0	0	0	32.71655805	167.1611638	0	0	20.44784878	0	0	0	0	0	0
F2S4_160613_006_F01	ALM	L1	GABAergic	Lamp5	2	Lamp5 Fam19a1 Pax6	Core	0	99.54377842	158.6478969	29.24098491	0	0	46.03899752	0	0	0	0	0	0	0	55.37122675	0	0	0	0	0	0	0	118.8303855	0	0	0	431.7711389	0	0
F2S4_160620_001_D01	ALM	L2/3	GABAergic	Lamp5	2	Lamp5 Fam19a1 Pax6	Core	0	0	108.3941821	0	53.42062844	0	33.85377035	0	0	0	0	0	0	0	79.82035761	0	0	0	9.006966423	0	0	0	114.9164682	0	0	0	379.2243449	0	0
F2S4_160620_015_C01	ALM	L2/3	GABAergic	Lamp5	2	Lamp5 Fam19a1 Pax6	Core	0	0	126.1774328	730.270161	64.30664526	0	17.05100443	0	0	0	0	0	0	0	45.30695462	0	0	0	28.74312175	0	0	0	222.6374006	0	0	0	270.8673846	0	27.76877864
F2S4_160623_027_G01	ALM	L2/3	GABAergic	Lamp5	2	Lamp5 Fam19a1 Pax6	Intermediate	0	0	127.8591243	0	0	0	77.71829125	0	0	0	0	0	0	0	43.24646852	0	0	0	0	0	0	0	41.36618728	0	0	0	352.2393523	0	12.53520827
F2S4_160630_002_F01	ALM	L1	GABAergic	Lamp5	2	Lamp5 Fam19a1 Pax6	Core	0	0	173.1471879	0	65.23503207	0	0	0	0	0	0	0	0	0	100.5960775	0	0	0	98.1573847	0	0	0	117.666927	0	0	0	388.3618264	0	3.658039181
F2S4_160707_001_A01	ALM	L1	GABAergic	Lamp5	2	Lamp5 Fam19a1 Pax6	Intermediate	0	0	71.89889	0	0	0	18.14271056	0	0	0	0	0	0	0	0	0	0	0	96.08917075	0	0	0	133.7184964	0	0	0	454.9116685	0	62.4915586
F2S4_160707_001_B01	ALM	L1	GABAergic	Lamp5	2	Lamp5 Fam19a1 Pax6	Core	0	0	62.5896361	0	13.4601368	0	46.43747194	0	0	0	0	0	0	0	0	0	0	0	58.55159506	0	0	0	144.0234637	0	0	0	96.23997809	0	0
F2S4_160721_002_D01	ALM	L1	GABAergic	Lamp5	2	Lamp5 Fam19a1 Pax6	Core	0	0	137.0828877	0	0	0	0	0	0	0	0	0	0	0	0	0	0	0	5.784088089	4.627270471	0	0	70.56587469	0	0	0	308.870304	0	0
F2S4_160721_003_C01	ALM	L1	GABAergic	Lamp5	2	Lamp5 Fam19a1 Pax6	Core	0	0	98.71775961	0	0	0	24.10549944	0	0	0	0	0	0	0	0	0	0	0	0	31.56672546	0	0	25.25338037	0	0	0	437.9165732	0	34.43642777
F2S4_160721_006_B01	ALM	L1	GABAergic	Lamp5	2	Lamp5 Fam19a1 Pax6	Core	0	0	260.6770941	0	0	0	0	0	0	0	0	0	0	0	0	0	0	0	0	0	0	0	160.7313921	0	0	0	469.335665	0	64.29255685
F2S4_160721_006_H01	ALM	L1	GABAergic	Lamp5	2	Lamp5 Fam19a1 Pax6	Intermediate	0	0	237.0283487	0	105.6853204	0	68.42055427	0	0	0	0	0	0	0	0	0	0	0	94.07826212	0	0	0	0	0	0	0	293.8418447	0	0
F2S4_160819_005_B01	ALM	L1	GABAergic	Lamp5	2	Lamp5 Fam19a1 Pax6	Core	0	0	252.9277077	0	112.8446696	17.7883223	0	0	0	0	0	0	0	0	54.47673704	0	0	0	0	0	0	0	80.60333542	0	0	0.555885072	529.2025884	0	0.555885072
F2S4_160819_006_D01	ALM	L1	GABAergic	Lamp5	2	Lamp5 Fam19a1 Pax6	Core	0	0	103.8171614	0	0	13.0398367	0	0	0	0	0	0	0	0	0	0	0	0	78.74055239	3.510725266	0	0	220.1726274	0	0	0	33.10112393	0	0
F2S4_160819_007_D01	ALM	L1	GABAergic	Lamp5	2	Lamp5 Fam19a1 Pax6	Core	0	0	147.6420625	0	1.562349868	0	0	0	0	0	0	0	0	0	7.030574406	0	0	0	44.52697124	0	0	0	382.7757176	0	0	0	834.2948295	0	0
F2S4_160819_008_C01	ALM	L1	GABAergic	Lamp5	2	Lamp5 Fam19a1 Pax6	Core	0	0	98.49873669	0	63.50576444	0	44.06522431	0	0	0	0	0	0	0	0	0	0	0	2.592072018	0	0	0	220.9741395	0	0	0	458.7967472	0	0
F2S4_160819_015_E01	ALM	L1	GABAergic	Lamp5	2	Lamp5 Fam19a1 Pax6	Core	0	0	279.2800748	288.6133421	49.53811096	0	149.3322765	0	0	0	0	0	0	0	78.97380008	0	0	0	0	0	0	0	79.69174372	0	0	0	381.9460149	0	91.89678555
F2S4_160919_008_E01	ALM	L1-L6	GABAergic	Lamp5	2	Lamp5 Fam19a1 Pax6	Core	0	0	193.2058084	0	37.36527426	0	89.76779305	0	0	0	0	0	0	0	32.8085335	0	0	0	30.53016312	0	0	0	51.03549655	0	0	27.79611866	263.8352902	0	37.36527426
F2S4_161020_007_H01	ALM	L1	GABAergic	Lamp5	2	Lamp5 Fam19a1 Pax6	Core	0	8.866894355	89.71210759	0	0	0	31.81650327	0	0	0	0	0	0	0	0	0	0	0	30.25175721	0	0	0	37.5539055	0	0	0	153.3451141	0	0
F1S4_160108_006_C01	VISp	L1	GABAergic	Lamp5	2	Lamp5 Fam19a1 Pax6	Core	0	0	0	0	11.76092795	0	40.90757547	0	0	0	0	0	0	0	0	0	0	0	0	0	0	0	4.090757547	0	0	0	241.3546953	0	0.511344693
F1S4_180124_303_H01	VISp	L1-L4	GABAergic	Lamp5	2	Lamp5 Fam19a1 Pax6	Core	0	0	7.665419758	0	0	5.475299827	30.66167903	0	0	0	0	0	0	0	31.756739	0	0	0	0	0	0	0	4.380239862	0	0	0	0	0	0
F1S4_180124_307_A01	VISp	L1-L4	GABAergic	Lamp5	2	Lamp5 Fam19a1 Pax6	Core	0	0	76.83287218	0	0	0	39.37684699	0	0	0	0	0	0	0	0	0	0	0	0	0	0	0	0.960410902	0	0	0	0	0	17.28739624
F1S4_180124_310_F01	VISp	L1-L4	GABAergic	Lamp5	2	Lamp5 Fam19a1 Pax6	Core	0	0	97.11053725	0	0	0	105.595924	0	0	0	0	0	0	0	0	0	0	0	76.36848075	0.94282075	0	0	0	0	0	0	0	0	0
F2S4_151223_001_G01	VISp	L2/3	GABAergic	Lamp5	2	Lamp5 Fam19a1 Pax6	Intermediate	0	0	196.6974411	955.8961616	51.62195286	0	44.5016835	0	0	0	0	0	0	0	77.43292929	0	0	0	0	0	34.71131313	0	132.6150168	0	0	0	452.1371043	0	0
F2S4_151223_003_B01	VISp	L2/3	GABAergic	Lamp5	2	Lamp5 Fam19a1 Pax6	Core	0	0	88.82653195	0	0.53509959	63.14175163	110.7656151	0	0	0	0	0	0	0	41.73776802	0	0	0.53509959	55.65035737	0	0	0	169.0914705	0.53509959	0	0	261.6636995	0	82.40533687
F2S4_160114_014_B01	VISp	L1	GABAergic	Lamp5	2	Lamp5 Fam19a1 Pax6	Core	0	0	27.13799944	208.2841457	0	0	271.3799944	0	0	0	0	0	0	0	0	0	0	0	0	0	0	0	0.678449986	0	0	0	0	0	0
F2S4_160115_024_B01	VISp	L1	GABAergic	Lamp5	2	Lamp5 Fam19a1 Pax6	Core	0	0	134.7035584	134.7035584	77.5824292	0	308.6246085	0	0	0	0	0	0	0	22.16640834	0	0	0	58.82623753	0	0	0	19.60874584	0	0	0	165.3955084	0	0
F2S4_160115_026_A01	VISp	L1	GABAergic	Lamp5	2	Lamp5 Fam19a1 Pax6	Core	0	0	51.56197075	0	0	0	51.56197075	0	0	24.59109374	0	0	0	0	0	0	0	0	0	0	0	0	40.45631551	0	0	0	163.4117842	0	95.19133061
F2S4_160303_021_F01	VISp	L2/3	GABAergic	Lamp5	2	Lamp5 Fam19a1 Pax6	Core	0	0	49.12816404	77.84924456	0.755817908	0	80.87251619	0	0	0	0	0	0	0	0	0	0	0	0	0	0	0	172.3264831	0	0	0	181.396298	0	0
F2S4_160304_001_D01	VISp	L1	GABAergic	Lamp5	2	Lamp5 Fam19a1 Pax6	Core	0	0	44.21465108	0	0	26.52879065	4.974148246	0	0	0	0	0	0	0	0	0	0	0	0	0	0	0	12.71171218	0	0	0	0	0	0
F2S4_160304_018_E01	VISp	L2/3	GABAergic	Lamp5	2	Lamp5 Fam19a1 Pax6	Core	0	0	125.8486424	432.8706926	35.26193845	17.02300477	0	0	0	0	0	0	0	0	0	0	0	0	0	0	0	0	105.1778509	0	0	0	327.0848773	0	23.71061378
F2S4_160321_001_A01	VISp	L2/3	GABAergic	Lamp5	2	Lamp5 Fam19a1 Pax6	Core	0	0	161.4068259	157.3967184	0	0	17.04295677	0	0	0	0	0	0	0	4.51137091	0	0	0	0	0	0	0	179.953573	0	0	0	296.7479532	0	57.14403153
F2S4_160330_002_H01	VISp	L2/3	GABAergic	Lamp5	2	Lamp5 Fam19a1 Pax6	Core	0	0	0	252.9348069	44.91773295	0	118.1816081	0	0	0	0	0	0	0	0	0	0	0	0	0	0	0	4.360944947	0	0	0	60.18104027	0	0
F2S4_160404_001_A01	VISp	L1	GABAergic	Lamp5	2	Lamp5 Fam19a1 Pax6	Core	0	0	0	0	2.193710085	0	89.39368595	0	0	0	0	0	0	0	0	0	0	0	0	0	0	0	107.4917942	0	0	0	168.367249	0	72.3924328
F2S4_160404_028_C01	VISp	L1	GABAergic	Lamp5	2	Lamp5 Fam19a1 Pax6	Core	0	0	72.27386978	28.90954791	0	0	220.5691433	0	0	0	0	0	0	0	0	0	0	0	133.3051376	36.40461589	0	0	85.65791974	0	0	0	328.712267	0	81.37502376
F2S4_160404_029_H01	VISp	L1	GABAergic	Lamp5	2	Lamp5 Fam19a1 Pax6	Core	0	0	123.5181498	0	5.881816658	0	0	0	0	0	0	0	0	0	0	0	0	0	86.02156862	0	0	0	52.93634992	0	0	0	191.1590414	0	39.70226244
F2S4_160404_032_A01	VISp	L1	GABAergic	Lamp5	2	Lamp5 Fam19a1 Pax6	Core	0	0	61.09102512	423.0932153	0	0	266.5790187	0	0	0	0	0	0	0	0	0	0	0	0	0	0	0	159.0386191	0	0	0	183.7779599	0	0
F2S4_160404_037_A01	VISp	L1	GABAergic	Lamp5	2	Lamp5 Fam19a1 Pax6	Core	0	0	80.45710545	113.1854195	89.32102385	2.727359507	17.04599692	0	0	13.63679753	0	0	0	0	10.22759815	0	0	0	8.182078521	0	0	0	146.5955735	0	0	0	56.59270977	0	2.04551963
F2S4_160404_037_D01	VISp	L1	GABAergic	Lamp5	2	Lamp5 Fam19a1 Pax6	Core	0	0	116.2613681	2.085405705	0	0	2.085405705	0	0	22.93946276	0	0	0	0	0	0	0	0	0	0	0	0	39.6227084	0	0	0	238.2576018	0	0.521351426
F2S4_160405_032_F01	VISp	L1	GABAergic	Lamp5	2	Lamp5 Fam19a1 Pax6	Intermediate	0	0	59.00889844	376.8635531	23.80190862	22.31428933	84.29842635	0	0	0	0	0	0	0	0.991746192	0	0	0	62.97588321	0	0	0	25.785401	0	0	0	128.927005	0	2.975238577
F2S4_160405_042_B01	VISp	L1	GABAergic	Lamp5	2	Lamp5 Fam19a1 Pax6	Intermediate	0	0	4.954024402	0	89.62280509	9.908048803	57.6468294	0	0	0	0	0	0	0	0	0	0	0	56.29573184	0	0	0	97.27902462	0	0	25.22048786	68.90597577	0	0
F2S4_160405_042_F01	VISp	L1	GABAergic	Lamp5	2	Lamp5 Fam19a1 Pax6	Core	0	0	77.06851391	73.56539964	11.5102326	0	96.08541994	0	0	0	0	0	0	0	30.52713863	0	0	0	0	0	0	0	147.6312442	0	0	0	415.8697082	0	55.04893851
F2S4_160405_043_G01	VISp	L1	GABAergic	Lamp5	2	Lamp5 Fam19a1 Pax6	Core	0	0	5.476403274	94.74177663	0.547640327	16.97685015	43.81122619	0	0	0	0	0	0	0	0.547640327	0	0	0	54.76403274	0	0	0	0	0	0	0	113.9091881	0	56.40695372
F2S4_160413_006_A01	VISp	L1	GABAergic	Lamp5	2	Lamp5 Fam19a1 Pax6	Core	0	0	67.9659016	145.7077206	0	0	135.4662833	0	0	0	0	0	0	0	74.01765996	0	0	0	0	0	0	0	188.0700291	0	0	0	98.69021328	0	0
F2S4_160413_008_E01	VISp	L1	GABAergic	Lamp5	2	Lamp5 Fam19a1 Pax6	Core	0	0	30.64415343	442.7858111	42.19122574	0	0	0	0	0	0	0	0	0	0	0	0	0	0	0	0	0	45.74417106	0	0	0	192.3031657	0	0
F2S4_160414_009_C01	VISp	L1	GABAergic	Lamp5	2	Lamp5 Fam19a1 Pax6	Core	0	0	89.81081786	0	0	0	48.0922444	0	0	0	0	0	0	0	0	0	0	0	0	52.72764145	0	0	100.8198859	0	0	0	87.49311933	0	22.59756062
F2S4_160414_010_B01	VISp	L2/3	GABAergic	Lamp5	2	Lamp5 Fam19a1 Pax6	Core	0	0	75.02119703	0	0	42.46482851	257.1481282	0	0	0	0	0	0	0	0	0	0	0	0	0	0	0	11.32395427	0	0	0	339.718628	0	0
F2S4_160415_016_C01	VISp	L1	GABAergic	Lamp5	2	Lamp5 Fam19a1 Pax6	Core	0	0	76.71854212	0	0	0	0	0	0	0	0	0	0	0	0	0	0	0	0.467795989	0	0	0	0.467795989	0	0	0	0	0	0
F2S4_160415_018_H01	VISp	L1	GABAergic	Lamp5	2	Lamp5 Fam19a1 Pax6	Core	0	0	21.13207037	625.0866415	0	0	35.07923681	0	0	0	0	0	0	0	0.422641407	0	0	0	46.0679134	0	0	0	128.9056292	0	0	0	269.2225765	0	29.58489852
F2S4_160415_019_H01	VISp	L1	GABAergic	Lamp5	2	Lamp5 Fam19a1 Pax6	Core	0	0	0	0	29.45557678	0	81.52882859	0	0	0	0	0	0	0	0	0	0	0	0	0	0	0	138.8620048	0	0	0	229.8586974	0	27.35160701
F2S4_160419_001_D01	VISp	L1	GABAergic	Lamp5	2	Lamp5 Fam19a1 Pax6	Core	0	0	57.64583287	115.2916657	94.22876527	0	283.7948695	0	0	0	0	0	0	0	0	0	0	0	159.6346141	0	0	0	128.0402634	0	0	0	98.10877325	0	0
F2S4_160419_001_F01	VISp	L1	GABAergic	Lamp5	2	Lamp5 Fam19a1 Pax6	Core	0	0	0	78.68516515	0	6.317786983	0	0	0	12.63557397	0	0	0	0	0	0	0	0	0	0	0	0	6.892131254	0	0	0	18.95336095	0	0
F2S4_160419_001_G01	VISp	L1	GABAergic	Lamp5	2	Lamp5 Fam19a1 Pax6	Core	0	0	51.30538374	502.3417243	112.7590851	0	28.18977129	0	0	0	0	0	0	0	0	0	0	0	4.510363406	0	0	0	102.6107675	0	0	0	319.1082109	0	0
F2S4_160429_002_F01	VISp	L1	GABAergic	Lamp5	2	Lamp5 Fam19a1 Pax6	Core	0	0	19.10492112	0	0	0	285.2409153	0	0	0	0	0	0	0	1.332901473	0	0	0	0	0	0	0	32.43393585	0	0	0	204.3782259	0	63.53497023
F2S4_160502_018_G01	VISp	L1	GABAergic	Lamp5	2	Lamp5 Fam19a1 Pax6	Core	0	0	91.48293843	145.2964316	20.54697013	0	160.4620524	0	0	0	0	0	0	0	0	0	0	0	0	0	0	0	21.52539728	0	0	0	90.50451128	0	0
F2S4_160502_019_A01	VISp	L1	GABAergic	Lamp5	2	Lamp5 Fam19a1 Pax6	Core	0	0	0	0	0	0	119.6082683	0	0	0	0	0	0	0	0	0	0	0	116.6909935	56.40064686	0	0	239.2165367	0	0	0	224.6301625	0	0
F2S4_160504_003_G01	VISp	L1	GABAergic	Lamp5	2	Lamp5 Fam19a1 Pax6	Core	0	0	100.8141175	77.78330614	0	7.821784975	0	0	0	0	0	0	0	0	0	0	0	0	0	0	0	0	0	0	0	0	33.89440156	0	0
F2S4_160504_004_F01	VISp	L1	GABAergic	Lamp5	2	Lamp5 Fam19a1 Pax6	Core	0	0	115.9484161	0	0	5.77118813	0	0	0	0	0	0	0	0	0	0	0	0	0	0	0	0	168.9384162	0	0	0	282.2635649	0	0.524653466
F2S4_160504_005_B01	VISp	L1	GABAergic	Lamp5	2	Lamp5 Fam19a1 Pax6	Core	0	0	1.897160615	0	95.80661104	0	61.65771997	0	0	0	0	0	0	0	0	0	0	0	0.474290154	68.29778212	0	0	64.02917074	0	0	0	9.485803073	0	0
F2S4_160504_008_H01	VISp	L1	GABAergic	Lamp5	2	Lamp5 Fam19a1 Pax6	Intermediate	0	0	0	0	93.67324376	0	60.99653082	0	0	0	0	0	0	0	0	0	0	0	92.58402	0	0	0	43.02433871	0	0	0	154.1251627	0	0
F2S4_160504_009_B01	VISp	L1	GABAergic	Lamp5	2	Lamp5 Fam19a1 Pax6	Core	0	0	11.37340417	105.4227079	95.79905819	0	158.3527811	0	0	0	0	0	0	0	0	0	0	0	59.49165258	0	0	0	92.29954922	0	0	0	266.4001207	0	49.43056427
F2S4_170707_021_C01	VISp	L1	GABAergic	Lamp5	2	Lamp5 Fam19a1 Pax6	Core	0	0	0	0	0	66.78808547	260.7639163	0	0	0	0	0	0	0	0	0	0	0	103.376341	0	0	0	103.376341	0	0	0	62.72272375	0	0
F2S4_160308_001_B01	ALM	L1	GABAergic	Lamp5	3	Lamp5 Fam19a1 Tmem182	Core	0	0	0	0	0	0	3.490873112	0	0	0	0	0	0	0	0	0	0	0	0	0	0	0	342.105565	0	0	0	849.2795586	0	98.2431433
F2S4_160308_001_D01	ALM	L1	GABAergic	Lamp5	3	Lamp5 Fam19a1 Tmem182	Intermediate	0	0	114.8599283	0	89.89037868	0	98.87941655	0	0	0	0	0	0	0	30.46285055	0	0	0	1.498172978	0	0	0	89.89037868	0	0	0	197.2594421	0	0
F2S4_160308_004_A01	ALM	L1	GABAergic	Lamp5	3	Lamp5 Fam19a1 Tmem182	Core	0	0	183.0543067	0	35.20275128	0	133.3563049	0	0	0.414150015	0	0	0	0	43.8999016	0	0	0	0	14.08110051	0	0	225.2976082	0	0	0	425.7462155	0	40.17255146
F2S4_160503_003_E01	ALM	L1	GABAergic	Lamp5	3	Lamp5 Fam19a1 Tmem182	Core	0	0	0	110.367314	0	7.934904925	212.799723	0	0	0	0	0	0	0	0	0	0	0	31.7396197	31.01826471	0	0	212.078368	0	0	0	363.5629166	0	0
F2S4_160505_001_B01	ALM	L1	GABAergic	Lamp5	3	Lamp5 Fam19a1 Tmem182	Core	7.340171437	0	0	0	0	0	162.9518059	0	0	0	0	0	0	0	41.10496005	0	0	0	93.95419439	0	0	0	96.15624583	0	0	0	471.6060148	0	0
F2S4_160505_005_A01	ALM	L1	GABAergic	Lamp5	3	Lamp5 Fam19a1 Tmem182	Core	0	0	227.9247022	52.0096636	0	0	129.5142603	0	0	0	0	0	0	0	40.28199436	0	0	0	0	0	0	0	176.934836	0	0	0	311.5480829	0	0
F2S4_160505_005_B01	ALM	L1	GABAergic	Lamp5	3	Lamp5 Fam19a1 Tmem182	Core	0	0	140.8630143	0	0	0	145.6706257	0	0	0	0	0	0	0	0	0	0.480761141	0	0	0	0	0	59.61438149	0	0	0	317.7831142	0	0
F2S4_160505_005_D01	ALM	L1	GABAergic	Lamp5	3	Lamp5 Fam19a1 Tmem182	Core	0	0	141.2563682	10.99271348	117.0723986	5.49635674	83.54462245	0	0	0	0	0	0	0	0	0	0	0	67.6051879	0	0	0	117.6220342	0	0	0	623.83649	0	4.397085392
F2S4_160505_005_G01	ALM	L1	GABAergic	Lamp5	3	Lamp5 Fam19a1 Tmem182	Core	0	0	68.77270621	0	0	0	259.1435306	0	0	0	0	0	0	0	0	0	0	0	0	65.78258854	0	0	121.5981182	0	0	0	240.2061188	0	0
F2S4_160518_010_B01	ALM	L2/3	GABAergic	Lamp5	3	Lamp5 Fam19a1 Tmem182	Core	0	0	49.32689726	0	0	1.861392349	32.10901803	0	0	0	0	0	0	0	0	0	0	0	0	0	0	0	214.0601202	0	0	0	400.1993551	0	0
F2S4_160518_010_F01	ALM	L2/3	GABAergic	Lamp5	3	Lamp5 Fam19a1 Tmem182	Core	0	0	27.15358348	0	0	0	80.05625473	0	0	0	0	0	0	0	163.8578313	0	0	0	0.468165232	0	0	0	79.11992427	0	0	0	1055.712599	0	0
F2S4_160518_011_C01	ALM	L2/3	GABAergic	Lamp5	3	Lamp5 Fam19a1 Tmem182	Core	0	0	5.437173874	0	0.836488288	0	20.49396306	0	0	0	0	0	0	0	0	0	0	0	5.437173874	0	0	0	94.52317658	0	0	0	398.1684252	0	0
F2S4_160524_001_C01	ALM	L1	GABAergic	Lamp5	3	Lamp5 Fam19a1 Tmem182	Core	0	0	81.97954272	0	0	0	19.55475331	0	0	0	0	0	0	0	0	0	0	0	6.016847172	0	0	0	86.86823105	0	0	0	197.4277978	0	0
F2S4_160524_001_F01	ALM	L1	GABAergic	Lamp5	3	Lamp5 Fam19a1 Tmem182	Core	0	0	49.53351478	0	0	0	27.44424467	0	0	0	0	0	0	0	28.78298832	0	0	0	14.72618007	0	0	0	68.27592577	0	0	0	374.8482199	0	0
F2S4_160524_008_E01	ALM	L1	GABAergic	Lamp5	3	Lamp5 Fam19a1 Tmem182	Core	0	0	45.47661739	0	0.897564817	0	130.4460867	0	0	0	0	0	0	0	0	0	0	0	0	0	0	0	78.98570389	0	0	0	687.5346497	0	0
F2S4_160524_008_H01	ALM	L1	GABAergic	Lamp5	3	Lamp5 Fam19a1 Tmem182	Core	0	0	0	94.60958555	0	45.30599871	126.5902905	0	0	0	0	0	0	0	0	0	0	0	149.9095546	0	0	0	239.1890226	0	0	0	156.5722014	0	0
F2S4_160525_002_H01	ALM	L1	GABAergic	Lamp5	3	Lamp5 Fam19a1 Tmem182	Core	0	0	79.43639875	0	0	45.51043678	108.3975858	0	0	0	0	0	0	0	0	0	0	0	44.6829743	0	0	0	55.43998663	0	0	0	559.3646412	0	21.51402466
F2S4_160526_009_B01	ALM	L1	GABAergic	Lamp5	3	Lamp5 Fam19a1 Tmem182	Core	0	0	45.89348886	0	0	0	113.094669	0	15.84418068	0	0	0	0	0	0	0	0	0	0	0	0	0	122.928988	0	0	0	661.6311311	0	0
F2S4_160531_008_A01	ALM	L1	GABAergic	Lamp5	3	Lamp5 Fam19a1 Tmem182	Core	0	0	0	0	0	0	0	0	0	0	0	0	0	0	0	0	0	0	6.997696592	0	0	0	40.81989678	0	0	0	407.0326851	0	0
F2S4_160531_012_F01	ALM	L1	GABAergic	Lamp5	3	Lamp5 Fam19a1 Tmem182	Core	0	0	79.119334	0	0	0	218.7084447	0	0	0	0	0	0	0	0	0	0	0	0	0	0	0	38.9945289	0	0	0	321.5635789	0	31.0825955
F2S4_160531_019_G01	ALM	L1	GABAergic	Lamp5	3	Lamp5 Fam19a1 Tmem182	Core	0	0	48.38496567	0	0	0.620320073	102.9731321	0	0	0	0	0	0	0	0	0	0	0	0	0	0	0	63.89296749	0	0	0	291.5504342	0	0
F2S4_160531_020_B01	ALM	L1	GABAergic	Lamp5	3	Lamp5 Fam19a1 Tmem182	Core	0	0	207.337198	418.9057674	17.52996718	0.604481627	136.008366	0	0	0	0	0	0	0	77.97812985	0	0	0	0	0	0	0	122.1052886	0	0	0	542.8245008	0	0
F2S4_160531_020_D01	ALM	L1	GABAergic	Lamp5	3	Lamp5 Fam19a1 Tmem182	Core	0	0	112.0403394	0	66.61858016	0	0	0	0	0	0	0	0	0	0	0	0	0	11.50684566	0	0	0	51.47799376	0	0	0	733.4100053	0	0
F2S4_160601_001_A01	ALM	L1	GABAergic	Lamp5	3	Lamp5 Fam19a1 Tmem182	Core	0	67.04640363	0	0	54.90869262	0.577986238	31.21125686	0	0	0	0	0	0	0	20.80750457	0	0	0	0	0	0	0	69.93633482	0.577986238	0	0	457.7651006	0	0
F2S4_160601_015_F01	ALM	L1	GABAergic	Lamp5	3	Lamp5 Fam19a1 Tmem182	Core	0	0	69.47945989	0.496281856	0	0	73.44971474	0	0	0	0	0	0	0	0	0	0	0	5.955382276	0	0	0	59.0575409	0	0	0	500.2521112	0	0.496281856
F2S4_160601_016_B01	ALM	L1	GABAergic	Lamp5	3	Lamp5 Fam19a1 Tmem182	Core	0	0	0	0	0	2.570536815	206.1570526	0	0	0	0	0	0	0	0	0	0	0	86.88414436	0	0	0	224.1508103	0	0	0	337.2544302	0	0
F2S4_160602_001_E01	ALM	L1	GABAergic	Lamp5	3	Lamp5 Fam19a1 Tmem182	Core	6.04365003	0	46.95451177	0	41.3757579	0	97.16329663	0	0	0	0	0	0	0	0	0	0	0	125.057066	0	0	0	79.96213886	0	0	0	215.7118165	0	6.04365003
F2S4_160602_001_G01	ALM	L1	GABAergic	Lamp5	3	Lamp5 Fam19a1 Tmem182	Core	0	0	0	0	0	0	99.52646356	0	0	0	0	0	0	0	0	0	0	0	68.75183338	0	0	0	356.1999749	0	0	24.22683653	412.5110003	0	62.20403973
F2S4_160602_002_B01	ALM	L1	GABAergic	Lamp5	3	Lamp5 Fam19a1 Tmem182	Core	0	0	0	0	0	0	51.1040978	0	0	0	0	0	0	0	21.18950397	0	0	0	0	0	0	0	200.677067	0	0	0	481.1263842	0	0
F2S4_160613_004_H01	ALM	L1	GABAergic	Lamp5	3	Lamp5 Fam19a1 Tmem182	Core	0	4.349882149	197.6089319	0	32.31341025	0	19.2637638	0	0	0	0	0	0	0	77.67646695	0	0	0	0	0	0	0	125.5251706	0	0	0	545.5995039	0	0
F2S4_160613_006_G01	ALM	L1	GABAergic	Lamp5	3	Lamp5 Fam19a1 Tmem182	Core	0	0	0	0	20.20648502	0	73.24850819	0	0	0	0	0	0	0	0	0	0	0	0.631452657	0	0	0	147.7599217	0	0	0	551.8896221	0	0.631452657
F2S4_160620_007_F01	ALM	L2/3	GABAergic	Lamp5	3	Lamp5 Fam19a1 Tmem182	Core	0	0	27.56030654	69.81944325	0	0	225.3820624	0	0	0	0	0	0	0	13.47392764	0	0	0	40.42178293	0	0	0	130.4521176	0	0	0	443.4147097	0	0
F2S4_160629_013_D01	ALM	L1	GABAergic	Lamp5	3	Lamp5 Fam19a1 Tmem182	Core	0	0	8.83913829	86.03427936	0	0	232.1746991	0	0	0	0	0.589275886	0	0	0	0	0	0	161.4615928	0	0	0	60.10614037	0	0	0	686.5064072	0	0
F2S4_160629_013_F01	ALM	L1	GABAergic	Lamp5	3	Lamp5 Fam19a1 Tmem182	Core	0	0	191.5267555	0	130.5406044	0	116.4281067	0	0	0	0	48.38570666	0	0	0	0	0	0	8.064284443	0	0	0	20.66472889	0	0	0	415.8146666	0	104.33168
F2S4_160629_013_H01	ALM	L1	GABAergic	Lamp5	3	Lamp5 Fam19a1 Tmem182	Core	0	0	46.01876825	0	0	32.79498427	91.50858515	0	0	0	0	0	0	0	6.87636767	0	0	0	104.7323691	0	0	0	37.5555465	0	0	0	18.51329757	0	0
F2S4_160629_016_C01	ALM	L1	GABAergic	Lamp5	3	Lamp5 Fam19a1 Tmem182	Core	0	0	0	0	0	0	49.94876043	0	0	0	0	0	0	0	0	0	0	0	51.07120448	23.01010312	0	0	66.22419922	0	0	0	213.8255924	0	5.612220273
F2S4_160629_016_H01	ALM	L1	GABAergic	Lamp5	3	Lamp5 Fam19a1 Tmem182	Core	0	0	77.66203685	67.6919105	0	1.574230477	71.36511495	0	0	0	0	0	0	0	0	0	0	0	32.53409652	7.871152384	0	0	81.85998479	0	0	0	567.7724586	0	6.296921907
F2S4_160629_017_D01	ALM	L1	GABAergic	Lamp5	3	Lamp5 Fam19a1 Tmem182	Core	0	0	17.61928254	0	21.59783021	0	53.42621158	0	0	0	0	0	0	0	0	0	0	0	43.76402438	0	0	0	26.71310579	0	0	0	532.557024	0	0
F2S4_160629_018_H01	ALM	L1	GABAergic	Lamp5	3	Lamp5 Fam19a1 Tmem182	Core	0	0	38.76607581	0	0	0	113.8753477	0	0	0	0	9.085799017	0	0	0	0	0	0	0	0	0	0	127.2011862	0	0	48.45759476	305.282847	0	0
F2S4_160630_002_A01	ALM	L1	GABAergic	Lamp5	3	Lamp5 Fam19a1 Tmem182	Core	0	0	144.013457	17.66707836	71.20367946	5.889026121	138.1244308	0	0	0	0	0	0	0	0	0	0	0	0	0	0.535366011	0	72.8097775	0	0	13.91951629	492.5367301	0	16.06098033
F2S4_160630_003_E01	ALM	L1	GABAergic	Lamp5	3	Lamp5 Fam19a1 Tmem182	Core	0	0	119.7343096	67.72471885	125.3468553	0	226.7468487	0	0	0	0	0	0	0	0	0	0	0	71.09224631	0	0	0	249.9453712	0	0	0	350.2228555	0	20.95350417
F2S4_160630_003_G01	ALM	L1	GABAergic	Lamp5	3	Lamp5 Fam19a1 Tmem182	Core	0	0	109.0863845	0	1.136316505	0	96.01874468	0	0	0	0	0	0	0	26.13527962	0	0	0	0	0	0	0	30.11238738	0	0	0	569.294569	0	36.36212816
F2S4_160630_004_A01	ALM	L1	GABAergic	Lamp5	3	Lamp5 Fam19a1 Tmem182	Core	0	0	61.35788406	0	13.63508535	39.76899893	49.99531294	24.42952791	0	0	0	0	0	0	0	0	0	0	0.568128556	0	0	0	38.63274182	0	0	0	393.7130894	0	0
F2S4_160707_004_D01	ALM	L1	GABAergic	Lamp5	3	Lamp5 Fam19a1 Tmem182	Core	0	0	14.04760734	0	0	11.49349692	160.2704292	0	0	0	0	0	0	0	34.48049075	0	0	0	75.34625756	0	0	0	70.87656431	0	0.638527606	0	911.1788944	0	0
F2S4_160708_005_A01	ALM	L1	GABAergic	Lamp5	3	Lamp5 Fam19a1 Tmem182	Core	0	0	76.2126558	0	14.3679597	0	0	0	0	0	0	0	0	0	0	0	0	0	51.2248998	0	0	0	87.457146	0	0	0	577.8418575	0	0
F2S4_160721_004_F01	ALM	L1	GABAergic	Lamp5	3	Lamp5 Fam19a1 Tmem182	Core	0	0	19.02383279	0	0	0	20.38267798	7.473648594	0	0	0	0	0	0	0	0	0	0	36.00939777	0	0	0	97.83685433	0	0	0	390.6679947	0	0
F2S4_160721_005_F01	ALM	L1	GABAergic	Lamp5	3	Lamp5 Fam19a1 Tmem182	Core	0	0	0	0	0	0	0	0	0	0	0	0	0	0	0	0	0	0	30.13550213	0	0	0	17.93779889	0	0	0	746.2124338	0	0
F2S4_160721_006_A01	ALM	L1	GABAergic	Lamp5	3	Lamp5 Fam19a1 Tmem182	Core	0	0	0	0	0	6.36430558	0	0	0	0	0	0	0	0	0	0	0	0	0	0	0	0	9.900030902	0	0	0	434.8942146	0	187.3934421
F2S4_160819_001_C01	ALM	L1	GABAergic	Lamp5	3	Lamp5 Fam19a1 Tmem182	Core	0	0	295.5166481	0	58.98766753	0	159.0353781	0	0	0	0	0	0	0	39.32511169	0	0	0	0	0	0	0	107.5657467	0	0	13.87945118	751.2252953	0	0
F2S4_160819_005_G01	ALM	L1	GABAergic	Lamp5	3	Lamp5 Fam19a1 Tmem182	Core	0	0	90.81524383	0	0	0	53.87344973	0	0	0	0	0	0	0	0	0	0	0	0	0	0	0	34.8894722	0	0	1.026160947	225.7554084	0	0
F2S4_160819_005_H01	ALM	L1	GABAergic	Lamp5	3	Lamp5 Fam19a1 Tmem182	Core	0	0	0	0	91.13645667	0	133.4675978	0	0	0	0	0	0	0	0	0	0	0	80.18016134	0	0	0	67.2318123	0	0	0	134.4636246	0	0
F2S4_160819_010_F01	ALM	L1	GABAergic	Lamp5	3	Lamp5 Fam19a1 Tmem182	Core	0	0	58.43913131	0	1.735815781	0.57860526	79.84752594	0	0	0	0	0	0	0	6.943263125	0	0	0	1.735815781	0	0	0	148.7015519	0	0	4.050236823	437.4255769	0	0
F2S4_160819_011_H01	ALM	L1	GABAergic	Lamp5	3	Lamp5 Fam19a1 Tmem182	Intermediate	0	0	186.0496789	128.2891577	0	0	45.6004115	0	0	0	0	0	0	0	0	0	0	0	0	0	0	0	77.82470229	0	0	0	0	0	4.256038406
F2S4_160819_012_C01	ALM	L1	GABAergic	Lamp5	3	Lamp5 Fam19a1 Tmem182	Core	0	0	44.13899431	0	0	0	200.8013403	0	0	0	0	0	0	0	0	0	0	0	77.08782106	0	0	0	26.73206698	0	0	0	287.214301	0	0
F2S4_160819_012_D01	ALM	L1	GABAergic	Lamp5	3	Lamp5 Fam19a1 Tmem182	Core	33.11489004	0	0	0	0	0	86.23669282	0	0	0	0	0	0	0	0	0	0	0	80.02765093	0	0	0	202.138808	0	0	0	501.5526054	0	0
F2S4_160819_012_F01	ALM	L1	GABAergic	Lamp5	3	Lamp5 Fam19a1 Tmem182	Core	1.771372495	0	82.36882101	0	0	0	205.4792094	0	0	0	0	0	0	0	0	0	0	0	182.451367	0	0	0	118.6819572	0	0	0	325.932539	0	0
F2S4_160819_015_B01	ALM	L1	GABAergic	Lamp5	3	Lamp5 Fam19a1 Tmem182	Core	0	0	79.37404889	0	0	0	108.2851263	0	0	0	0	0	0	0	0	0	0	0	0	0	0	0	83.05364056	0	0	0	468.3594541	0	0
F2S4_160819_018_G01	ALM	L1	GABAergic	Lamp5	3	Lamp5 Fam19a1 Tmem182	Core	0	0	0	0	59.87632568	0	231.2780213	0	0	0.457071188	0	0	0	0	0	0	0	0	52.56318666	0	0	0	139.4067125	0	0	0	463.470185	0	67.64653588
F2S4_160906_006_C01	ALM	L1-L6	GABAergic	Lamp5	3	Lamp5 Fam19a1 Tmem182	Core	0	0	63.78371149	63.26932672	0	9.258925862	98.76187586	0	0	0	0	0	0	0	8.744541092	0	0	0	18.51785172	0	0	0	163.5743569	0	10.80208017	0	242.2752267	0	0
F2S4_160919_008_G01	ALM	L1-L6	GABAergic	Lamp5	3	Lamp5 Fam19a1 Tmem182	Core	0	0	61.95820988	0	0.458949703	0	0	0	0	0	0	0	0	0	45.43602058	0	0	0	0	0	0	0	15.60428989	0	0	0	480.5203388	0	23.86538454
F2S4_160919_009_C01	ALM	L1-L6	GABAergic	Lamp5	3	Lamp5 Fam19a1 Tmem182	Core	0	0	42.69820208	0	7.566769989	26.48369496	0	0	0	0	0	0	0	0	35.67191566	0	0	0	41.07675137	0	0	0	37.83384995	0	0	0	212.4100433	0	0
F2S4_161019_007_A01	ALM	L1	GABAergic	Lamp5	3	Lamp5 Fam19a1 Tmem182	Intermediate	0	0	99.33353982	0	91.92979772	60.4638938	229.516005	0	0	0	0	0	0	0	40.10360303	0	0	0	0	0	0	0	166.5841972	0	0	0	167.8181542	0	110.439153
F2S4_161019_009_H01	ALM	L1	GABAergic	Lamp5	3	Lamp5 Fam19a1 Tmem182	Core	0	49.11854291	162.2567597	0	36.42498688	7.174618628	189.299553	0	0	0	0	14.34923726	0	0	0	0	0	0	45.25528673	0	0	0	209.1677277	0	0	0	370.3206999	0	0
F2S4_161019_011_D01	ALM	L1	GABAergic	Lamp5	3	Lamp5 Fam19a1 Tmem182	Core	0	0	76.4711041	0	0	25.25651144	75.76953433	0	0	0	0	0	0	0	0	0	0	0	5.612558099	0	0	0	166.9736034	0	0	0	106.6386039	0	0
F2S4_161019_011_F01	ALM	L1	GABAergic	Lamp5	3	Lamp5 Fam19a1 Tmem182	Core	0	44.07728014	132.7384758	0	0	0	135.7782882	0	0	0	0	0	0	0	0	0	0	0	0	0	0	0	159.5901522	0	0	0	428.6135517	0	88.66119568
F2S4_161019_013_F01	ALM	L1	GABAergic	Lamp5	3	Lamp5 Fam19a1 Tmem182	Core	0	0	70.09125342	0	67.39543598	38.28060764	40.97642508	0	0	0	0	0	0	0	0	0	0	0	125.6250927	0	0	0	1.078326976	0	0	0	479.3163407	0	0
F2S4_161020_003_H01	ALM	L1	GABAergic	Lamp5	3	Lamp5 Fam19a1 Tmem182	Core	0	0	152.7375663	0	0.678833628	25.11684424	77.3870336	0	0	0	0	0	0	0	0	0	0	0	32.58401415	0	0	0	93.67904067	0	0	23.75917698	538.3150671	0	118.1170513
F2S4_161020_008_A01	ALM	L1	GABAergic	Lamp5	3	Lamp5 Fam19a1 Tmem182	Core	0	0	160.6828928	0	0	0	36.60527439	0	19.01572696	0	0	0	0	0	0	0	0	0	170.6661494	40.88381296	0	0	78.91526687	0	0	0	289.9898361	0	0
F2S4_161020_008_E01	ALM	L1	GABAergic	Lamp5	3	Lamp5 Fam19a1 Tmem182	Core	0	65.03374909	72.36838245	0	0	0.977951114	121.2659382	0	0	0	0	0	0	0	0.977951114	0	0	0	59.65501796	0	0	0	33.73931344	0	0	0	292.4073831	0	0
F1S4_160108_005_C01	VISp	L1	GABAergic	Lamp5	3	Lamp5 Fam19a1 Tmem182	Core	0	0	22.77435987	287.8426039	87.93433393	0	127.1568426	0	0	0	0	1.897863322	0	0	0	0	0	0	13.28504326	0	0	0	39.85512977	0	0	0	222.0500087	0	110.0760727
F1S4_160108_005_D01	VISp	L1	GABAergic	Lamp5	3	Lamp5 Fam19a1 Tmem182	Core	0	0	56.84411994	535.0379537	114.2742617	80.871016	51.56992325	0	0	0	0	0	0	0	0	0	0	0	4.688174841	0	0	0	114.8602836	0	0	29.88711461	138.3011578	0	0
F1S4_160108_006_A01	VISp	L1	GABAergic	Lamp5	3	Lamp5 Fam19a1 Tmem182	Core	0	0	0	396.1802844	0	0	337.2972696	0	0	0	0	0	0	0	0	0	0	0	45.44232665	97.28498099	0	0	78.72403067	0	0	0	227.2116332	0	29.44150741
F1S4_170426_010_A01	VISp	L2/3	GABAergic	Lamp5	3	Lamp5 Fam19a1 Tmem182	Intermediate	0	0	116.5178486	1.031131404	0	45.88534747	175.2923386	0	0	0	0	0	0	0	0	0	0	0	0	0	0	0	31.44950782	0	0	0	597.5406485	0	0
F1S4_180130_330_E01	VISp	L1-L4	GABAergic	Lamp5	3	Lamp5 Fam19a1 Tmem182	Core	0	0	47.36281772	65.89609421	0	12.35551767	183.273512	0	0	0	0	0	0	0	0	0	0	0	2.059252944	0	0	0	61.77758833	0	0	0	131.7921884	0	0
F2S4_151223_001_E01	VISp	L2/3	GABAergic	Lamp5	3	Lamp5 Fam19a1 Tmem182	Core	0	0	0	143.3127681	0	62.30989917	158.4451722	0	0	0	0	0	0	0	0	0	0	0	0	0	0	0	153.1043237	0	0	0	131.7409297	0	12.46197983
F2S4_160113_003_G01	VISp	L2/3	GABAergic	Lamp5	3	Lamp5 Fam19a1 Tmem182	Core	0	0	56.57728634	70.72160793	60.70271347	49.50512555	4.125427129	0	0	0	0	0	0	0	0	0	0	0	0	0	0	0	12.96562812	0	0	0	307.6389945	0	128.4775877
F2S4_160114_014_F01	VISp	L1	GABAergic	Lamp5	3	Lamp5 Fam19a1 Tmem182	Core	0	0	65.79911725	74.26831056	0	63.19321162	381.7651753	0	0	0	0	0	0	0	0	0	0	0	0	0	0	0	28.01348556	0	0	0	129.6438053	0	0
F2S4_160115_010_E01	VISp	L2/3	GABAergic	Lamp5	3	Lamp5 Fam19a1 Tmem182	Core	0	0	0.493184438	326.9812822	0	19.72737751	23.67285301	0	0	0	0	0	0	0	0.493184438	0	0	0	32.55017289	0	0	0	90.74593653	0	0	0	159.7917578	0	0
F2S4_160115_025_F01	VISp	L1	GABAergic	Lamp5	3	Lamp5 Fam19a1 Tmem182	Core	0	0	12.75898344	100.15802	73.36415478	1.275898344	81.01954485	0	0	0	0	0	0	0	0	0	0	0	41.46669618	0	0	0	93.77852829	0	0	0	484.2034216	0	53.58773045
F2S4_160115_028_C01	VISp	L1	GABAergic	Lamp5	3	Lamp5 Fam19a1 Tmem182	Core	0	13.11572882	128.9713334	220.7814351	0	102.0112241	52.46291528	0	0	0	0	0	0	0	0	0	0	0	1.457303202	0	0	0	61.93538609	0	0	0	198.9218871	0	26.23145764
F2S4_160115_028_H01	VISp	L1	GABAergic	Lamp5	3	Lamp5 Fam19a1 Tmem182	Core	0	0	36.13177711	561.1716632	0	53.06854763	110.6535674	0	0	0	0	0	0	0	53.06854763	0	0	0	100.4915051	0	0	0	236.5502283	0	0	0	176.7069724	0	120.2510707
F2S4_160119_006_A01	VISp	L1	GABAergic	Lamp5	3	Lamp5 Fam19a1 Tmem182	Core	0	0	77.8837835	556.5962108	0	41.67030455	0.496075054	0	0	0	0	0	0	0	0	0	0	0	0	0	0	0	0	0	0	0	714.348078	0	15.37832668
F2S4_160119_006_C01	VISp	L1	GABAergic	Lamp5	3	Lamp5 Fam19a1 Tmem182	Core	0	0	0	0	0	0	80.1673352	0	0	0	0	0	0	0	0	0	0	0	0	0	0	0	129.283942	0	0	0	95.41042006	0	0
F2S4_160121_002_F01	VISp	L2/3	GABAergic	Lamp5	3	Lamp5 Fam19a1 Tmem182	Core	0	0	3.446214075	84.43224485	1.723107038	51.69321113	275.697126	0	0	0	0	0	0	0	0	0	0	0	0	0	0	0	72.37049558	0	0	0	330.8365512	0	58.58563928
F2S4_160121_002_G01	VISp	L2/3	GABAergic	Lamp5	3	Lamp5 Fam19a1 Tmem182	Core	0	0	48.06049832	97.85812309	0	0	16.21318016	0	0	0.579042148	0	0	0	0	0	0	0	0	0	0	0	0	104.8066289	0	0	0	28.95210742	0	0
F2S4_160127_001_E01	VISp	L2/3	GABAergic	Lamp5	3	Lamp5 Fam19a1 Tmem182	Core	0	0	12.83753549	478.0453691	0	6.72442335	45.84834102	0	0	0	0	0	0	0	0	0	0	0	16.50540277	48.90489709	0	0	37.90129525	0	0	0	286.7049592	0	93.53061569
F2S4_160304_003_A01	VISp	L1	GABAergic	Lamp5	3	Lamp5 Fam19a1 Tmem182	Core	0	0	21.94675388	55.9642224	0	30.17678659	127.2911725	0	0	0	0	0	0	0	0	0	0	0	0	0	0	0	35.11480621	0	0	0	123.9991594	0	0
F2S4_160304_004_G01	VISp	L1	GABAergic	Lamp5	3	Lamp5 Fam19a1 Tmem182	Core	0	0	61.21449559	270.2977727	5.564954145	45.31462661	0	0	0	0	0	0	0	0	0	0	0	0	0	0	0	0	1.589986899	0	0	0	186.8234606	0	0
F2S4_160330_004_G01	VISp	L2/3	GABAergic	Lamp5	3	Lamp5 Fam19a1 Tmem182	Core	0	0	112.0346344	0	0	14.39802531	0	0	0	0	0	0	0	0	0	0	0	0	20.24722309	0	0	0	0.899876582	0	0	0	826.9865788	0	19.34734651
F2S4_160330_019_B01	VISp	L2/3	GABAergic	Lamp5	3	Lamp5 Fam19a1 Tmem182	Core	0	0	0	227.0754906	0	42.93791096	313.7770416	0	0	0	0	0	0	0	0	0	0	0	0	0	0	0	57.80103398	0	0	0	118.0792551	0	231.2041359
F2S4_160404_002_F01	VISp	L1	GABAergic	Lamp5	3	Lamp5 Fam19a1 Tmem182	Core	0	0	3.168017721	167.9049392	0	5.068828353	68.42918277	0	0	0	0	0	0	0	0	0	0	0	0	0	0	0	25.97774531	0	0	0	57.02431897	0	0
F2S4_160404_003_F01	VISp	L1	GABAergic	Lamp5	3	Lamp5 Fam19a1 Tmem182	Core	0	0	242.9914179	1150.01602	56.33960309	37.84645093	36.98630432	0	0	0	0	0	0	0	0	0	0	24.94425175	0	0	0	0	33.54571787	0	0	0	504.4759879	0	0
F2S4_160404_004_D01	VISp	L1	GABAergic	Lamp5	3	Lamp5 Fam19a1 Tmem182	Core	0	0	38.61251712	344.6167153	56.47080628	27.51141845	213.3341571	0	0	0	0	0	0	0	0	0	0	0	0	0	0	0	147.692878	0	0	0	115.8375513	0	0
F2S4_160404_004_G01	VISp	L1	GABAergic	Lamp5	3	Lamp5 Fam19a1 Tmem182	Core	0	0	84.60638674	52.28036162	27.93607109	14.76620901	417.8438062	0	0	0	0	0	0	0	0	0	0	0	44.29862702	0	0	0	134.8913147	0	0	0.39908673	278.9616242	0	0
F2S4_160404_019_B01	VISp	L2/3	GABAergic	Lamp5	3	Lamp5 Fam19a1 Tmem182	Core	0	0	153.9690095	331.155568	0	42.15818116	158.2459264	0	0	0	0	0	0	0	0	0	0	0	8.553833859	0	0	0	142.3602349	0	0	0	212.0128821	0	0
F2S4_160404_032_F01	VISp	L1	GABAergic	Lamp5	3	Lamp5 Fam19a1 Tmem182	Core	0	0	164.1703747	348.9355993	37.65915406	0	231.8391672	0	0	0	0	0	0	0	0	0	0	0.588424282	0	0	0	0	55.31188252	0	0	0	172.996739	0	0
F2S4_160404_034_E01	VISp	L1	GABAergic	Lamp5	3	Lamp5 Fam19a1 Tmem182	Core	0	0	0	259.1942097	0	3.795731104	69.94990177	0	0	0	0	0	0	0	0	0	0	0	61.27394496	35.24607454	0	0	62.90068686	0	0	0	60.73169766	0	4.337978404
F2S4_160404_036_E01	VISp	L1	GABAergic	Lamp5	3	Lamp5 Fam19a1 Tmem182	Core	0	0	52.49844232	277.6891291	0	0	48.35382845	0	0	0	0	0	0	0	0	0	0	0	38.68306276	0	0	0	38.68306276	0	0	0	297.0306605	0	0
F2S4_160404_044_B01	VISp	L2/3	GABAergic	Lamp5	3	Lamp5 Fam19a1 Tmem182	Core	0	0	3.764811171	27.9671687	0	10.21877318	37.11028154	0	0	0	0	0	0	0	0	0	0	0	4.840471505	0	0	0	18.28622569	0	0	0	153.8194278	0	0
F2S4_160405_009_F01	VISp	L1	GABAergic	Lamp5	3	Lamp5 Fam19a1 Tmem182	Core	0	0	19.67158031	131.8527545	86.12962189	5.848307659	112.7128385	0	0	0	0	0	0	0	0	0	0	0	55.2930906	0	0	0	181.2975374	0	0	0	202.0324464	0	3.189985996
F2S4_160405_043_F01	VISp	L1	GABAergic	Lamp5	3	Lamp5 Fam19a1 Tmem182	Core	0	0	126.9943951	699.7650345	71.53153686	59.60961405	196.9708986	0	0	0	0	0	0	0	0	0	0	0	0	0	0	0	120.255917	0	0	0	21.77046774	0	0
F2S4_160413_006_F01	VISp	L1	GABAergic	Lamp5	3	Lamp5 Fam19a1 Tmem182	Core	0	0	85.73079502	283.4831622	0	0	215.4700648	0	0	0	0	0	0	0	0	0	0	0	57.72540198	0	0	0	48.58078384	0	0	0	213.1839103	0	11.43077267
F2S4_160414_002_H01	VISp	L1	GABAergic	Lamp5	3	Lamp5 Fam19a1 Tmem182	Core	0	0	3.768090197	86.12777594	101.7384353	20.99364539	163.1044757	0	0	0	0	0	0	0	4.844687397	0	0	0	88.81926894	0	0	0	82.89798434	0	0	0	211.5513496	0	0
F2S4_160415_018_A01	VISp	L1	GABAergic	Lamp5	3	Lamp5 Fam19a1 Tmem182	Intermediate	0	0	51.78075564	302.5696393	0	0	104.7207819	0	0	0	0	0	0	0	0	0	0	0	45.2115553	0	0	0	82.30821606	0	0	0	185.0968802	0	0
F2S4_160415_018_G01	VISp	L1	GABAergic	Lamp5	3	Lamp5 Fam19a1 Tmem182	Core	0	0	49.18587821	347.6438771	0	57.78146858	95.50655963	0	0	0	0	0	0	0	0.477532798	0	0	0	0	0	0	0	0	0	0	0	532.4490699	0	74.01758371
F2S4_160415_019_C01	VISp	L1	GABAergic	Lamp5	3	Lamp5 Fam19a1 Tmem182	Core	0	0	143.9880791	34.60178646	0	0	43.53127974	0	0	0	0	0	0	0	0	0	0	0	36.83415978	0	0	0	33.4855998	0	0	0	230.4925453	0	0
F2S4_160415_020_C01	VISp	L1	GABAergic	Lamp5	3	Lamp5 Fam19a1 Tmem182	Core	0	0	108.8136436	31.38855103	6.800852722	170.5444606	0	0	0	0	0	0	0	0	0	0	0	0	29.81912347	0	0	0	133.9244844	0	0	0	208.2107218	0	0
F2S4_160415_022_G01	VISp	L1	GABAergic	Lamp5	3	Lamp5 Fam19a1 Tmem182	Core	0	0	54.45039345	138.6520328	4.490754099	16.27898361	129.6705246	0	0	0	0	0	0	0	0	0	0	0	0	0	0	0	147.0721967	0	0	0	49.39829509	0	132.4772459
F2S4_160429_021_C01	VISp	L2/3	GABAergic	Lamp5	3	Lamp5 Fam19a1 Tmem182	Core	0	0	11.52582938	282.1322584	0	32.57299608	109.7459407	0	0	0	0	0	0	0	0	0	0	0	5.011230167	0	0	0	86.69428189	0	0	0	165.8717185	0	65.64711519
F2S4_160504_009_F01	VISp	L1	GABAergic	Lamp5	3	Lamp5 Fam19a1 Tmem182	Core	0	0	0	114.4519874	0	0.499790338	28.48804926	0	0	0	0	0	0	0	0	0	0	0	104.4561806	0	0	0	140.441085	0	0	20.99119419	212.4108936	0	25.98909757
F2S4_160504_010_B01	VISp	L1	GABAergic	Lamp5	3	Lamp5 Fam19a1 Tmem182	Core	0	0	80.72623218	265.4468458	40.36311609	0	4.273741704	0	0	0	0	0	0	0	0	0	0	0	0	0	0	0	54.13406158	0	0	0	410.7540637	0	0
F2S4_160504_010_D01	VISp	L1	GABAergic	Lamp5	3	Lamp5 Fam19a1 Tmem182	Core	0	0	63.44553201	576.5050704	0	12.48927795	266.271406	0	0	0	0	0	0	0	0	0	0	0	0	0	0	0	99.91422364	0	0	0	0	0	0
F2S4_170707_022_F01	VISp	L1	GABAergic	Lamp5	3	Lamp5 Fam19a1 Tmem182	Intermediate	0	0	0	170.4721137	0	0	179.8774717	0	0	0	0	0	0	0	0	0	0	0	0	5.290513873	0	0	102.2832682	0	0	0	0	0	0
F2S4_170707_022_G01	VISp	L1	GABAergic	Lamp5	3	Lamp5 Fam19a1 Tmem182	Core	0	0	46.16083242	0	0	1.15402081	143.0985805	0	0	0	0	0	0	0	0	0	0	0	0	0	0	0	21.34938499	0	0	0	291.3902546	0	4.616083242
F2S4_171122_007_A01	VISp	L1-L4	GABAergic	Lamp5	3	Lamp5 Fam19a1 Tmem182	Core	0	0	73.96025938	106.252767	0	1.041693794	75.00195318	0	0	0	0	0	0	0	0	0	0	0	0	0	0	1.041693794	0	0	0	0	234.3811037	0	19.79218209
F2S4_160307_007_F01	ALM	L5	GABAergic	Lamp5	4	Lamp5 Ntn1 Npy2r	Intermediate	0	0	158.2399606	0	0	22.60570866	0	0	0	0	0	0	0	0	102.2394551	0	0	0	0	0	0	0	36.47739352	0	0	0	1135.423094	0	0
F2S4_160307_009_H01	ALM	L2/3	GABAergic	Lamp5	4	Lamp5 Ntn1 Npy2r	Core	0	0	0.686241476	157.149298	0	0	61.07549137	0	0	0	0	0	0	0	0	0	0	0	48.03690332	0	0	0	50.09562775	0	0	32.93959085	248.4194143	0	0
F2S4_160307_011_A01	ALM	L1	GABAergic	Lamp5	4	Lamp5 Ntn1 Npy2r	Intermediate	0	0	11.58393114	0	0	0	43.55558109	0	0	0	0	0	0	0	0	0	0	0	7.413715931	0	0	0	184.4161838	0	0	0	370.2224393	0	0
F2S4_160420_032_G01	ALM	L2/3	GABAergic	Lamp5	4	Lamp5 Ntn1 Npy2r	Core	0	0	0.443336301	0	0	0	46.99364788	0	31.92021365	0	0	0	0	0	21.72347874	0	0	0	0	0	0	0	57.6337191	0	0	0	216.7914511	0	0
F2S4_160503_003_C01	ALM	L1	GABAergic	Lamp5	4	Lamp5 Ntn1 Npy2r	Core	0	0	77.28802584	232.9085103	0	14.62205894	31.33298345	0	0	0	0	0	0	0	0	0	0	0	0	0	0	0	114.887606	0	0	0	273.6413888	0	56.9215866
F2S4_160503_004_C01	ALM	L5	GABAergic	Lamp5	4	Lamp5 Ntn1 Npy2r	Intermediate	0	0	123.7852818	82.3232214	37.85666385	0	245.1669659	0	0	0	0	0	0	0	1.201798853	0	0	0	13.8206868	30.64587074	0	0	170.6554371	0	0	0	668.200162	0	0
F2S4_160505_001_E01	ALM	L1	GABAergic	Lamp5	4	Lamp5 Ntn1 Npy2r	Intermediate	0	0	80.36750595	0	73.7072154	0	0	0	0	0	0	0	0	0	0	0	0	0	0	0	0	0	69.2670217	0	0	0	539.0395151	0	0
F2S4_160505_001_H01	ALM	L1	GABAergic	Lamp5	4	Lamp5 Ntn1 Npy2r	Core	0	0	112.7312576	0	63.88104598	31.94052299	91.59414681	0	0	0	0	0	0	0	2.348567867	0	0	0	0	0	0	0	72.3358903	0	0	0	530.7763379	0	0
F2S4_160505_003_B01	ALM	L1	GABAergic	Lamp5	4	Lamp5 Ntn1 Npy2r	Core	2.338485485	0	128.6167017	110.3765149	0	0	57.99444002	0	0	0	0	0	0	0	25.25564323	0	0	0	0	0	0	1.870788388	217.011453	0	0	39.75425324	255.830312	0	0
F2S4_160505_004_A01	ALM	L1	GABAergic	Lamp5	4	Lamp5 Ntn1 Npy2r	Core	0	0	0	0	0	0	209.224327	0	0.37361487	0.37361487	0	0	0	0	0	0	0	0	0	0	0	0	158.0390898	0	0	0	677.3637585	0	0
F2S4_160505_004_H01	ALM	L1	GABAergic	Lamp5	4	Lamp5 Ntn1 Npy2r	Core	0	0	0	0.762981947	0	0.762981947	0	0	0	0	0	0	0	0	0	0	0	0	30.51927788	0	0	0	100.713617	0	102.2395809	7.629819471	7.629819471	0	0
F2S4_160505_020_F01	ALM	L2/3	GABAergic	Lamp5	4	Lamp5 Ntn1 Npy2r	Core	0	0	0	143.622016	0	0	61.96889016	0	0	0	0	0	0	0	0	0	0	0	110.0859108	0	0	0	275.5792998	0	0	0	223.8170503	0	0
F2S4_160505_023_B01	ALM	L2/3	GABAergic	Lamp5	4	Lamp5 Ntn1 Npy2r	Core	0	0	25.34469828	164.1173086	0	0	214.8067051	0	0	0	0	0	0	0	0	0	88.49870056	0	57.33718628	0	0	0	24.92921143	0	0	0	485.2886491	0	0
F2S4_160506_013_A01	ALM	L1	GABAergic	Lamp5	4	Lamp5 Ntn1 Npy2r	Core	0	0	73.4947889	46.47464592	0	0	63.04700028	0	0	0	0	0	0	0	0	0	0	0	15.85181721	0	0	0	238.1375268	0	0	0	409.6253675	0	0
F2S4_160523_001_D01	ALM	L1	GABAergic	Lamp5	4	Lamp5 Ntn1 Npy2r	Core	0	0	0.381301435	0	0	0	0	0	0	0	0	0	0	0	0	0	0	0	1.525205741	0	0	0	117.0595406	0	0	0.381301435	285.2134735	0	0
F2S4_160524_001_D01	ALM	L1	GABAergic	Lamp5	4	Lamp5 Ntn1 Npy2r	Core	0	0	91.10049397	16.40506979	0	0	187.0876045	0	0	0	0	0	0	0	139.2685712	0	0	0	31.0649194	0	0	0	193.0213531	0	0	75.74255629	328.1013959	0	0
F2S4_160524_002_F01	ALM	L2/3	GABAergic	Lamp5	4	Lamp5 Ntn1 Npy2r	Core	0	0	387.4062207	0.394507353	54.44201472	0	157.8029412	0	0	0	0	0	0	0	0	0	0	0	0	0	0	0	98.2323309	0	0	201.19875	260.374853	0	0
F2S4_160524_008_G01	ALM	L1	GABAergic	Lamp5	4	Lamp5 Ntn1 Npy2r	Intermediate	0	0	258.1285749	78.49937483	103.9586315	22.6304504	55.16172286	9.193620476	0	0	0	0	0	0	0	0	0	0	12.02242678	31.82407088	0	0	65.06254491	0	0	0	354.3079891	0	0
F2S4_160524_013_B01	ALM	L2/3	GABAergic	Lamp5	4	Lamp5 Ntn1 Npy2r	Core	0	0	123.296148	140.7437162	0.775447472	74.05523357	98.0941052	0	0	0	0	0	0	0	0.775447472	0	0	0	22.10025295	0	0	0	70.95344368	0	0	15.50894944	112.0521597	0	0
F2S4_160525_001_E01	ALM	L1	GABAergic	Lamp5	4	Lamp5 Ntn1 Npy2r	Intermediate	25.45184324	0	51.73817313	0	10.01383996	0	88.87282966	0	0	0	0	0	0	0	5.424163312	0	0	0	119.3315929	0	0	0	38.38638652	0	0	0.834486663	523.6403813	0	0
F2S4_160525_022_A01	ALM	L1	GABAergic	Lamp5	4	Lamp5 Ntn1 Npy2r	Intermediate	2.074777757	0	114.8043692	45.64511065	0	40.11236996	55.32740685	0	0	0	0	0	0	0	0	0	0	0	49.10307358	0	0	0	250.356516	0	0	0	275.2538491	0	0
F2S4_160525_022_E01	ALM	L1	GABAergic	Lamp5	4	Lamp5 Ntn1 Npy2r	Core	0	0	39.13053547	130.1689241	0	0	79.85823566	0	0	0	0	0	0	0	0	0	0	0	0	0	0	0	194.0555127	0	0	75.06674152	243.5676188	0	0
F2S4_160526_007_H01	ALM	L1	GABAergic	Lamp5	4	Lamp5 Ntn1 Npy2r	Core	0	0	92.33962514	0	64.73810676	0	158.0814235	0	0	0	0	0	0	0	1.003691578	0	0	0	0	0	0	0	78.28794305	0	0	0	13.04799051	0	0
F2S4_160526_009_A01	ALM	L1	GABAergic	Lamp5	4	Lamp5 Ntn1 Npy2r	Core	0	0	149.5770803	61.55879837	40.49920946	0	0	0	0	0	0	0	0	0	0	0	107.4579024	0	19.43962054	0	0	0	140.9372489	0	0	0	410.9319786	0	0
F2S4_160526_022_E01	ALM	L2/3	GABAergic	Lamp5	4	Lamp5 Ntn1 Npy2r	Core	0	0	19.67531691	0	0	0	15.63935447	0	0	0	0	0	0	0	5.54944836	0	0	0	162.4474883	0	0	0	106.9530047	0	0	83.24172539	292.6072771	0	0
F2S4_160531_002_D01	ALM	L2/3	GABAergic	Lamp5	4	Lamp5 Ntn1 Npy2r	Core	0	0	55.52909876	0	0.60357716	0	36.81820678	0	0	0	0	0	0	0	65.18633332	0	0	0	0	0	0	0	264.3667963	0	0	0	325.3280895	0	0
F2S4_160531_010_D01	ALM	L1	GABAergic	Lamp5	4	Lamp5 Ntn1 Npy2r	Core	0	0	44.17062207	0	0	1.596528508	47.36367908	0	0	0	0	0	0	0	61.73243566	0	0	0	0	0	0	0	42.57409356	0	0	0	83.01948244	0	0
F2S4_160531_010_G01	ALM	L1	GABAergic	Lamp5	4	Lamp5 Ntn1 Npy2r	Intermediate	0	0	0	0	0	0	99.6915722	0	0	0	0	0	0	0	0	0	0	0	0	0	0	0	149.5373583	0	0	0	301.3149766	0	0
F2S4_160531_010_H01	ALM	L1	GABAergic	Lamp5	4	Lamp5 Ntn1 Npy2r	Intermediate	0	0	124.9067577	0.583676438	0	0	0	0	0	0	0	0	0	0	0	0	0	0	0	0	0	0	445.345122	0	0	0	250.3971918	0	0
F2S4_160531_011_A01	ALM	L1	GABAergic	Lamp5	4	Lamp5 Ntn1 Npy2r	Core	0	0	38.73623616	48.12683887	18.78120541	0	90.38455105	0	0	0	0	0	0	0	0	0	0	0	7.04295203	0	0	0	154.9449447	0	0	0	349.2130381	0	0
F2S4_160531_011_E01	ALM	L1	GABAergic	Lamp5	4	Lamp5 Ntn1 Npy2r	Core	0	0	233.3126508	304.3208489	6.76268553	8.453356913	52.41081286	0	0	0	0	0	0	0	0	0	0	0	0	0	0	0	324.6089054	0	0	0	289.1048064	0	0
F2S4_160531_012_C01	ALM	L1	GABAergic	Lamp5	4	Lamp5 Ntn1 Npy2r	Core	0	0	196.3531481	0	0	67.06215212	50.74973674	0	0	0	0	0	0	0	0.604163533	0	0	0	122.0410336	0	0	0	0.604163533	0	0	0	193.936494	0	0
F2S4_160531_018_D01	ALM	L1	GABAergic	Lamp5	4	Lamp5 Ntn1 Npy2r	Intermediate	0	0	0.695732032	0	0	7.65305235	4.174392191	0	0	0	0	0	0	0	0	0	0	0	71.66039928	0	0	0	369.4337089	0	0	0	219.8513221	0	0
F2S4_160531_020_C01	ALM	L1	GABAergic	Lamp5	4	Lamp5 Ntn1 Npy2r	Core	0	0	157.5764288	0	0	6.85114908	54.80919264	0	0	0	0	0	0	0	78.78821442	0	0	0	203.2507561	34.82667449	0	0	183.839167	0	0	0	423.6293848	0	0
F2S4_160531_023_E01	ALM	L2/3	GABAergic	Lamp5	4	Lamp5 Ntn1 Npy2r	Core	0	0	48.45708901	0	0	0	26.83777238	0	0	0	0	0	0	0	20.12832928	0	0	0	0	0	0	0	2.981974708	0	0	26.0922787	612.7958026	0	0
F2S4_160601_015_B01	ALM	L1	GABAergic	Lamp5	4	Lamp5 Ntn1 Npy2r	Intermediate	0	0	0.680242956	0	0	0	77.54769694	0	0	0	0	0	0	0	0	0	0	0	26.52947527	0	0	0	310.8710307	0	0	0	363.2497383	0	0
F2S4_160601_015_H01	ALM	L1	GABAergic	Lamp5	4	Lamp5 Ntn1 Npy2r	Core	0	0	59.88451	0	0	0	0	0	0	0	0	0	0	0	0	0	0	0	121.4022339	0	0	0	131.745922	0	0	0	71.861412	0	0
F2S4_160601_017_F01	ALM	L1	GABAergic	Lamp5	4	Lamp5 Ntn1 Npy2r	Core	0	0	54.05978809	5.609978009	0	0	0	0	0	0	0	0	0	0	0	0	0	0	28.04989004	0	0	1.019996002	41.81983607	0	0	0	281.0088984	0	0
F2S4_160602_002_H01	ALM	L1	GABAergic	Lamp5	4	Lamp5 Ntn1 Npy2r	Core	0	0	96.72357626	100.8022813	76.91272329	0	75.16470685	0	0	0	0	0	0	0	0	0	0	0	0	0	0	36.12567306	152.6601023	0	0	32.04696804	329.2097626	0	0
F2S4_160613_003_A01	ALM	L1	GABAergic	Lamp5	4	Lamp5 Ntn1 Npy2r	Core	0	1.711032797	138.0233123	0	0	0	13.11791811	0	0	0	0	0	0	0	0	0	0	0	0	0	0	0	21.10273782	0	0	0	351.3320675	0	0
F2S4_160613_003_F01	ALM	L1	GABAergic	Lamp5	4	Lamp5 Ntn1 Npy2r	Intermediate	0	0	12.56547613	22.84632023	55.40232656	21.13284621	25.13095225	0	0	0	0	0	0	0	0	0	0	0	7.99621208	0	0	0	136.5067634	0	0	23.98863624	378.6777578	0	0
F2S4_160613_004_D01	ALM	L1	GABAergic	Lamp5	4	Lamp5 Ntn1 Npy2r	Intermediate	0	0	39.3671613	0	0	0	36.47251709	0	0	0	0	0	0	0	0	0	0	0	0	16.78893644	0	0	61.36645733	0	0	0	78.73432261	0	0
F2S4_160613_005_D01	ALM	L1	GABAergic	Lamp5	4	Lamp5 Ntn1 Npy2r	Core	0	0	90.78733911	0	0	11.27015244	0	0	0.62611958	0	0	57.60300137	0	0	0	0	0	0	18.7835874	0	0	0	72.00375171	0	0	0	340.6090516	0	0
F2S4_160613_005_F01	ALM	L1	GABAergic	Lamp5	4	Lamp5 Ntn1 Npy2r	Intermediate	0	0	109.6280867	134.485618	0	0	122.3755387	0	0	0	0	0	0	0	0	0	0	0	7.648471166	0	0	0	125.5624016	0	0	0	119.1886757	0	0
F2S4_160613_006_A01	ALM	L1	GABAergic	Lamp5	4	Lamp5 Ntn1 Npy2r	Core	0	0	245.1985566	0	0	0	0	0	0	0	0	0	0	0	0	0	0	0	0	0	0	0	271.9606409	0	0	0	548.9843789	0	0
F2S4_160613_007_G01	ALM	L1	GABAergic	Lamp5	4	Lamp5 Ntn1 Npy2r	Intermediate	0	0	162.177186	188.8510653	2.667387928	0	184.5832446	0	0	0	0	0	0	0	0	0	0	0	10.13607413	35.20952065	0	0	206.4558257	0	0	19.20519308	263.5379273	0	48.01298271
F2S4_160613_018_F01	ALM	L2/3	GABAergic	Lamp5	4	Lamp5 Ntn1 Npy2r	Core	0	0	154.2760262	0	0	0	83.85735219	0	0	0	0	0	0	0	46.22905313	0	0	0	0	0	0	0	137.6120651	0	0	0	315.0026179	0	0
F2S4_160620_002_C01	ALM	L2/3	GABAergic	Lamp5	4	Lamp5 Ntn1 Npy2r	Core	0	0	54.61251363	116.4220252	0	87.6340335	1.270058457	0	0	0	0	0	0	0	35.13828396	0	0	0	0	0	0	0	80.8603884	0	0	0	923.3324979	0	0
F2S4_160620_002_H01	ALM	L2/3	GABAergic	Lamp5	4	Lamp5 Ntn1 Npy2r	Core	0	0	121.5730126	0	196.4132236	0	104.6408381	0	0	0	0	0	0	0	0	0	0	0	0	0	0	0	0	0	0	0	207.2498153	0	0
F2S4_160620_006_D01	ALM	L2/3	GABAergic	Lamp5	4	Lamp5 Ntn1 Npy2r	Core	1.542663517	0	256.0821437	95.64513803	43.19457846	0	0	0	0	0	0	0	0	0	0.771331758	0	0	0	0	0	0	0	0	0	0	0	317.0173527	0	0
F2S4_160620_016_H01	ALM	L2/3	GABAergic	Lamp5	4	Lamp5 Ntn1 Npy2r	Core	0	0	52.74739274	153.763626	58.22117877	0	162.7207304	0	0	0	0	0	0	0	0	0	0	0	1.99046765	0	0	0	334.8961822	0	0	16.91897503	382.6674058	0	0
F2S4_160620_028_A01	ALM	L2/3	GABAergic	Lamp5	4	Lamp5 Ntn1 Npy2r	Core	0	0	112.6831665	127.1066118	82.93481053	0	29.74835595	0	0	0	0	0	0	0	0	0	0	0	20.28296997	0	0	0	78.42748388	0	0	50.48205859	411.518924	0	0
F2S4_160623_026_A01	ALM	L2/3	GABAergic	Lamp5	4	Lamp5 Ntn1 Npy2r	Core	0	0	19.69454441	109.3386776	177.9300219	0	0	0	0	0	0	0	0	0	131.0705886	0	0	0	0	0	0	0	122.921122	0	0	0	679.8013432	0	0
F2S4_160623_026_F01	ALM	L2/3	GABAergic	Lamp5	4	Lamp5 Ntn1 Npy2r	Core	0	0	3.433493236	0	0	0	151.5642014	0	0	0	0	0	0	0	0	0	0	0	0	0	0	0	0	0	0	0	142.7352188	0	0
F2S4_160623_027_A01	ALM	L2/3	GABAergic	Lamp5	4	Lamp5 Ntn1 Npy2r	Core	0	0	2.780765556	146.8244214	47.27301445	7.229990445	721.3305852	0	0	0	0	0	0	0	0	0	0	0	0	0	0	0	226.3543162	0	0	0	797.5235614	0	58.39607667
F2S4_160623_027_E01	ALM	L2/3	GABAergic	Lamp5	4	Lamp5 Ntn1 Npy2r	Core	0	0	59.92606046	122.6179391	5.53163635	0	177.0123632	0	0	0	0	0	0	0	0	0	0	0	40.56533323	0	0	0	144.7444845	0	0	0	214.8118783	0	0
F2S4_160623_030_B01	ALM	L2/3	GABAergic	Lamp5	4	Lamp5 Ntn1 Npy2r	Core	0	0	42.18707495	176.0219334	0	29.09453445	57.21925108	0	0	0	0	0	0	0	0	0	0	0	67.40233813	0	0	0	5.818906889	0	0	0	89.70814788	0	0
F2S4_160629_013_E01	ALM	L1	GABAergic	Lamp5	4	Lamp5 Ntn1 Npy2r	Core	0	0	0	185.8014998	120.4894575	0	56.30348479	0	0	0	0	0	0	0	0	0	0	0	1.689104544	0	0	0	177.3559771	0	6.756418175	0	497.7228056	0	0
F2S4_160629_015_C01	ALM	L1	GABAergic	Lamp5	4	Lamp5 Ntn1 Npy2r	Core	0	0	128.3054622	0	0	0.580567702	82.44061373	0	4.063973916	0	0	0	0	0	95.21310318	0	0	0	0	0	0	0	4.063973916	0	0	0	881.8823398	0	0
F2S4_160629_016_F01	ALM	L1	GABAergic	Lamp5	4	Lamp5 Ntn1 Npy2r	Core	1.539583461	0	64.14931086	0.513194487	0	0	86.21667379	0	0	0	0	0	0	0	0	0	0	0	22.06736293	3.079166921	0	0	97.5069525	0	0	30.79166921	223.2396018	0	0
F2S4_160629_019_H01	ALM	L1	GABAergic	Lamp5	4	Lamp5 Ntn1 Npy2r	Intermediate	0	6.718450415	284.242133	91.9910903	25.32339003	0	168.9948681	0	0	0	0	0	0	0	0	0	0	0	48.57956454	0	0	0	317.3175812	0	0	0	389.1533202	0	0
F2S4_160630_004_B01	ALM	L1	GABAergic	Lamp5	4	Lamp5 Ntn1 Npy2r	Core	0	0	38.20080408	0	131.1216789	0	0	0	0	1.032454164	0	0	0	0	0	0	0	0	0	0	0	0	23.74644578	0	0	0	143.5111288	0	0
F2S4_160707_007_C01	ALM	L1	GABAergic	Lamp5	4	Lamp5 Ntn1 Npy2r	Core	0	0	110.0693129	108.8394882	0	0	23.98158214	0	0	0	0	0	0	0	0	0	0	0	0.614912363	0	0	0	28.28596868	0	0	0	806.1501075	0	0
F2S4_160708_004_B01	ALM	L1	GABAergic	Lamp5	4	Lamp5 Ntn1 Npy2r	Intermediate	0	0	176.3277736	0	0	0	0.63656236	0	0	0	0	0	0	0	0	0	0	0	0	0	0	0	91.02841742	0	0	1.273124719	369.2061685	0	0
F2S4_160708_004_D01	ALM	L1	GABAergic	Lamp5	4	Lamp5 Ntn1 Npy2r	Core	0	74.40698586	158.3533289	30.52594292	53.42040011	29.25402863	146.9061003	0	0	0	0	0	0	0	0	0	0	0	0	0	0	0	303.3515577	0	0	27.3461572	134.8229146	0	0
F2S4_160708_005_C01	ALM	L1	GABAergic	Lamp5	4	Lamp5 Ntn1 Npy2r	Core	0	0	11.11878925	0	35.58012561	0	114.5235293	0	0	0	0	0	0	0	0	0	0	0	48.36673325	0	0	0	85.61467725	0	0	59.4855225	86.72655617	0	0
F2S4_160708_005_F01	ALM	L1	GABAergic	Lamp5	4	Lamp5 Ntn1 Npy2r	Core	0	0	0	0	92.51526121	4.066604888	0	0	0	0	0	0	0	0	43.71600255	0	0	0	0	0	0	0	0	0	0	0	236.3714091	0	0
F2S4_160721_003_B01	ALM	L1	GABAergic	Lamp5	4	Lamp5 Ntn1 Npy2r	Intermediate	0	0	95.41748113	0	0	5.929899957	43.66562696	0	0	0	0	0	0	0	0	0	0	0	25.33684527	0	0	0	199.9993531	0	0	0	480.3218965	0	0
F2S4_160721_004_A01	ALM	L1	GABAergic	Lamp5	4	Lamp5 Ntn1 Npy2r	Core	0	0	34.73215621	200.7400893	61.81146444	0	103.607788	0	0	0	0	0.588680614	0	0	0	0	0	27.07930823	78.88320223	0	0	0	185.4343933	0	0	110.6719554	317.2988508	0	0
F2S4_160721_004_C01	ALM	L1	GABAergic	Lamp5	4	Lamp5 Ntn1 Npy2r	Intermediate	0	0	0	0	0	0	162.8364004	0	0	0	0	0	0	0	0	0	0	0	0	0	0	0	132.0861789	0.698868671	0	0	230.6266616	0	0
F2S4_160721_004_H01	ALM	L1	GABAergic	Lamp5	4	Lamp5 Ntn1 Npy2r	Core	0	0	185.1984222	113.0685104	0	55.88443618	0	0	0	0	0	0	0	0	0	0	0	0	0	0	0	0	72.12991182	0	0	0	287.2200092	0	0
F2S4_160725_002_C01	ALM	L1	GABAergic	Lamp5	4	Lamp5 Ntn1 Npy2r	Core	0	0	88.58280398	35.43312159	0	0	13.42163697	0	0	0	0	0	0	0	0	0	0	0	77.30862893	0	0	0	101.4675755	0	0	0	263.60095	0	0
F2S4_160725_002_F01	ALM	L1	GABAergic	Lamp5	4	Lamp5 Ntn1 Npy2r	Core	0	0	0	0	12.29215741	20.7025809	3.881733919	0	0	0	0	0	0	0	0	0	0	0	0	0	0	0	104.8068158	0	0	0	342.8864962	0	0
F2S4_160819_001_A01	ALM	L1	GABAergic	Lamp5	4	Lamp5 Ntn1 Npy2r	Core	0	0	0	233.4861606	0	0	0	0	0	0	0	14.34190176	0	0	0	0	0	0	7.457788915	0	0	0.57367607	33.84688815	0	0	0	100.3933123	0	0
F2S4_160819_001_D01	ALM	L1	GABAergic	Lamp5	4	Lamp5 Ntn1 Npy2r	Intermediate	0	0	55.34197652	0	71.94456948	9.223662753	147.5786041	0	0	0	0	0	0	0	0	0	0	0	3.074554251	0	0	0	193.082007	0	0	0	319.7536421	0	0
F2S4_160819_002_D01	ALM	L1	GABAergic	Lamp5	4	Lamp5 Ntn1 Npy2r	Core	0	0	35.85463098	70.5141076	22.11035577	92.02688619	178.0780006	0	0	0	0	0	0	0	0	0	0	0	0	0	0	0	44.81828873	0	0	0	392.6082093	0	0
F2S4_160819_002_H01	ALM	L1	GABAergic	Lamp5	4	Lamp5 Ntn1 Npy2r	Core	8.626512113	0	37.0432579	0	0	0	211.6032677	0	0	0	0	0	0	0	0	0	0	0	10.14883778	0	0	0	99.96605214	0	0	0.507441889	314.1065293	0	0
F2S4_160819_004_C01	ALM	L1	GABAergic	Lamp5	4	Lamp5 Ntn1 Npy2r	Core	0	0	166.5276801	1.280982155	0	0	0	0	0	0	0	0	0	0	0	0	0	0	0	0	0	0	208.1596001	0	0	0.640491077	582.2063893	0	0
F2S4_160819_004_D01	ALM	L1	GABAergic	Lamp5	4	Lamp5 Ntn1 Npy2r	Core	0	0	89.07239556	0	13.52998414	13.52998414	0	0	0	0	0	0	0	0	0	0	0	0	98.65613433	0	0	0	0	0	0	0	500.0456637	0	0
F2S4_160819_007_F01	ALM	L1	GABAergic	Lamp5	4	Lamp5 Ntn1 Npy2r	Core	0	0	77.81774626	80.1065035	0	0	69.42563637	0	0	0	0	0	0	0	0	0	0	0	0	0	0	0	137.3254346	0	0	0	291.4350889	0	0
F2S4_160819_008_A01	ALM	L1	GABAergic	Lamp5	4	Lamp5 Ntn1 Npy2r	Intermediate	0	0	99.47045353	0	45.99171507	0	255.6283698	0	0	0	0	0	0	0	0	0	0	0	0	0	0	0	82.89204461	0	0	0	452.9649147	0	0
F2S4_160819_008_F01	ALM	L1	GABAergic	Lamp5	4	Lamp5 Ntn1 Npy2r	Intermediate	0	0	13.15845179	803.8097723	105.2676143	0.572106599	438.2336552	0	0	0	0	0	0	0	0	0	0	0	72.65753813	0	0	0	220.2610408	0	0	94.96969551	319.2354825	0	33.75428937
F2S4_160819_010_A01	ALM	L1	GABAergic	Lamp5	4	Lamp5 Ntn1 Npy2r	Core	0	0	15.77494774	0	52.81178155	0	45.26724133	0	0	0	0	0	0	0	0	0	0	0	0	0	0	0	0	0	0	0	275.0327845	0	0
F2S4_160819_012_G01	ALM	L1	GABAergic	Lamp5	4	Lamp5 Ntn1 Npy2r	Intermediate	0	0	35.16803929	99.74934779	0	0	93.99457773	0	0	0	0	0	0	0	0	0	0	0	116.3742391	0	0	0	143.8692516	0	0	30.05268812	419.4587958	0	0
F2S4_160819_012_H01	ALM	L1	GABAergic	Lamp5	4	Lamp5 Ntn1 Npy2r	Core	0	0	122.1334181	0.526437147	0	13.16092868	40.00922318	0	0	0	0	0	0	0	0	0	0	0	145.2966526	51.59084041	0	0	53.696589	0	0	0	502.2210383	0	0
F2S4_160819_016_F01	ALM	L1	GABAergic	Lamp5	4	Lamp5 Ntn1 Npy2r	Intermediate	0	0	44.27360043	0	29.68935558	0	162.5101569	0	0	0	0	0	0	0	0	0	0	0	0	0	0	0	147.925912	0	0	0	435.9647478	0	0
F2S4_160819_016_G01	ALM	L1	GABAergic	Lamp5	4	Lamp5 Ntn1 Npy2r	Core	0	0	54.32365354	233.3006906	0	7.760521934	0	0	0	0	0	0	0	0	0	0	0	0	0	0	0	0	333.7024432	0	0	20.37137008	408.8824994	0	48.98829471
F2S4_160919_006_G01	ALM	L1-L6	GABAergic	Lamp5	4	Lamp5 Ntn1 Npy2r	Intermediate	45.76669383	0	205.1025908	146.905437	62.15230026	18.08066917	209.0577372	0	0	0	0	0	0	0	19.21071099	0	31.07615013	0	5.650209114	0	0	0	73.45271849	0	0	244.6540546	385.9092825	0	0
F2S4_161004_028_D01	ALM	L1-L2/3	GABAergic	Lamp5	4	Lamp5 Ntn1 Npy2r	Core	0	0	31.87744989	0	0	23.63328182	0	0	0	0	0	0	0	0	4.946500845	0	0	0	0.549611205	0	0	0	66.50295581	0	0	0	468.8183579	0	0
F2S4_161004_028_E01	ALM	L1-L2/3	GABAergic	Lamp5	4	Lamp5 Ntn1 Npy2r	Core	0	0	33.15950166	0	0	0	106.902274	0	0	0	0	0	0	0	0	0	0	0	1.484753806	0	0	0	33.65441959	0	0	0	136.5973501	0	0
F2S4_161004_028_F01	ALM	L1-L2/3	GABAergic	Lamp5	4	Lamp5 Ntn1 Npy2r	Core	0	0	43.60736132	0	1.503702115	0	0	0	1.002468076	0	0	0	0	0	97.23940341	0	0	0	0	0	0	0	0	0	0	0	108.7677863	0	0
F2S4_161004_028_H01	ALM	L1-L2/3	GABAergic	Lamp5	4	Lamp5 Ntn1 Npy2r	Core	0	0	8.330483001	175.9201999	0	0	0	0	0	0	0	0	0	0	6.370369354	0	0	0	0	0	0	0	290.5868482	0	0	67.13389242	371.4415362	0	0
F2S4_161019_002_D01	ALM	L1	GABAergic	Lamp5	4	Lamp5 Ntn1 Npy2r	Core	0	0	37.51885677	0	19.11337986	0	70.79029578	0	0	0	0	0	0	0	67.25078099	0	0	0	0	0	0	0	1.415805916	0	0	0	402.08888	0	0
F2S4_161019_007_E01	ALM	L1	GABAergic	Lamp5	4	Lamp5 Ntn1 Npy2r	Core	0	0	77.35938836	0	129.905388	44.51813859	0	0	0	0	0	0	0	0	0	0	0	0	27.73261092	0	0	0	267.1088315	0	0	0	202.1561375	0	0
F2S4_161019_009_C01	ALM	L1	GABAergic	Lamp5	4	Lamp5 Ntn1 Npy2r	Core	0	0	0	0	0	0	0	0	0	0	0	0	0	0	0	0	0	0	8.73121895	0	0	0	221.4554624	0	0	0	546.8918051	0	0
F2S4_161019_011_E01	ALM	L1	GABAergic	Lamp5	4	Lamp5 Ntn1 Npy2r	Core	0	0	0	0	57.65886731	1.712639623	0	0	0	0	0	0	0	0	0	0	0	0	0	0	0	0	146.7161277	0	0	0	77.06878303	0	0
F2S4_161019_012_E01	ALM	L1	GABAergic	Lamp5	4	Lamp5 Ntn1 Npy2r	Core	0	0	0	206.8998934	97.39315825	0	0	0	0	0	0	0	0	0	0	0	0	0	0	0	0	0	19.86626611	0	0	0	338.69561	0	0
F2S4_161019_012_H01	ALM	L1	GABAergic	Lamp5	4	Lamp5 Ntn1 Npy2r	Intermediate	0	0	306.203479	0	47.48091921	11.62798021	28.10095219	0	0	0	0	0	0	0	0	0	0	0	13.56597692	0	0	0	32.46144477	0	0	0	261.6295548	0	0
F2S4_161020_001_F01	ALM	L1	GABAergic	Lamp5	4	Lamp5 Ntn1 Npy2r	Core	0	0	366.9900088	121.6061567	0	0	7.600384797	0	0	0	0	0	0	0	0	0	0	0	0	0	0	0	14.65788496	0.542884628	0	0	258.4130831	0	0
F2S4_161020_002_G01	ALM	L1	GABAergic	Lamp5	4	Lamp5 Ntn1 Npy2r	Core	0	0	142.3092976	15.39914041	0	0	28.14325661	0	0	0	0	0	0	0	0.531004842	0	0	0	0	0	0	0	77.52670689	0	0	25.4882324	207.6228931	0	0
F2S4_161020_002_H01	ALM	L1	GABAergic	Lamp5	4	Lamp5 Ntn1 Npy2r	Intermediate	0	0	177.8372949	192.2999665	13.92701707	61.06461332	62.67157683	0	0	0	0	0	0	0	3.74958152	0	0	0	155.8754603	0	0	0	13.39136257	0	0	0	445.1288919	0	0
F2S4_161020_006_F01	ALM	L1	GABAergic	Lamp5	4	Lamp5 Ntn1 Npy2r	Core	0	0	50.92278362	94.86984346	0	79.52325113	166.7197984	0	0	0	0	0	0	0	0	0	0	0	0	0	0	0	196.7154107	0	0	0	69.05966546	0	0
F2S4_161020_007_D01	ALM	L1	GABAergic	Lamp5	4	Lamp5 Ntn1 Npy2r	Core	0	0	0	0	0	0	42.09953954	0	0	0	0	0	0	0	14.2022543	0	0	0	0	0	0	0	89.77853613	0	0	16.73837114	194.7737733	0	25.86839177
F1S4_160108_005_H01	VISp	L1	GABAergic	Lamp5	4	Lamp5 Ntn1 Npy2r	Core	0	0	125.7723904	80.6422974	0	33.29269159	320.3496768	0	0	0	0	0	0	0	0	0	0	0	0	28.11382845	0	0	164.2439452	0	0	0	207.1545254	0	0
F1S4_160108_006_G01	VISp	L1	GABAergic	Lamp5	4	Lamp5 Ntn1 Npy2r	Core	0	0	0	372.6885996	0	49.49184622	0	0	0	0	0	0	0	0	0	0	0	0	0	0	0	0	128.2288743	0	0	0	301.4503361	0	80.98665745
F1S4_170426_015_G01	VISp	L2/3	GABAergic	Lamp5	4	Lamp5 Ntn1 Npy2r	Core	0	0	879.2470103	0	208.742096	0	119.609796	0	0	0	0	0	0	0	63.8302277	0	0	0	0	0	0	0	0	0	0	0	447.386641	0	0
F1S4_170426_016_C01	VISp	L2/3	GABAergic	Lamp5	4	Lamp5 Ntn1 Npy2r	Core	0	0	104.7446413	369.5158179	0	5.819146739	296.7764837	0	0	0	0	0	0	0	0	0	0	0	0	0	0	0	0	0	0	0	373.5892206	0	0
F1S4_180108_301_E01	VISp	L1-L4	GABAergic	Lamp5	4	Lamp5 Ntn1 Npy2r	Intermediate	0	0	0	0	0	20.01019186	108.055036	0	0	0	0	0	0	0	1.334012791	0	0	0	0	0	0	0	2.668025581	0	0	0	249.4603918	0	0
F1S4_180130_309_G01	VISp	L1-L4	GABAergic	Lamp5	4	Lamp5 Ntn1 Npy2r	Intermediate	0	0	221.4445445	0	34.48726512	0	0	0	0	0	0	0	0	0	0	0	0	0	0	0	0	0	43.56286121	0	0	0	201.4782331	0	0
F1S4_180130_310_B01	VISp	L1-L4	GABAergic	Lamp5	4	Lamp5 Ntn1 Npy2r	Core	0	0	70.53947446	371.7620951	0	0	0	0	0	0	0	0	0	0	0	0	0	0	158.2371995	0	0	0	15.25177826	0	0	0	51.47475163	0	0
F1S4_180130_311_F01	VISp	L1-L4	GABAergic	Lamp5	4	Lamp5 Ntn1 Npy2r	Core	0	0	0	89.25244384	0	20.08179986	211.9745541	0	0	0	0	0	0	0	0	0	0	0	49.08884411	0	0	0	26.77573315	0	0	0	100.4089993	0	0
F1S4_180130_311_G01	VISp	L1-L4	GABAergic	Lamp5	4	Lamp5 Ntn1 Npy2r	Intermediate	0	0	0	0	0	0	0	0	0	0	0	0	0	0	0	0	0	0	125.2445031	0	0	0	169.4484453	0	0	0	419.9374514	0	0
F1S4_180130_311_H01	VISp	L1-L4	GABAergic	Lamp5	4	Lamp5 Ntn1 Npy2r	Core	0	0	223.5919429	0	0	0	22.88736424	0	0	0	0	0	0	0	0	0	0	0	19.36623128	0	0	0	8.802832399	0	0	0	54.57756088	0	0
F1S4_180130_330_A01	VISp	L1-L4	GABAergic	Lamp5	4	Lamp5 Ntn1 Npy2r	Intermediate	0	0	0	92.92333082	0	0	0	0	0	0	0	0	0	0	0	0	0	0	0	0	0	0	0	0	0	0	161.6865956	0	0
F1S4_180130_330_B01	VISp	L1-L4	GABAergic	Lamp5	4	Lamp5 Ntn1 Npy2r	Core	0	0	43.77097359	0	0	0	104.2166038	0	0	0	0	0	0	0	0	0	0	0	6.252996227	0	0	0	114.6382642	0	0	0	385.601434	0	0
F1S4_180130_331_G01	VISp	L1-L4	GABAergic	Lamp5	4	Lamp5 Ntn1 Npy2r	Core	0	0	0	171.248463	0	0	0	0	0	0	0	0	0	0	0	0	0	0	0	0	0	0	195.9329261	0	0	0	128.0506525	0	0
F2S4_151223_001_D01	VISp	L2/3	GABAergic	Lamp5	4	Lamp5 Ntn1 Npy2r	Core	0	0	0.918809407	272.8863938	0	27.5642822	57.88499263	0	0	0	0	0	0	0	20.21380695	0	0	0	0	0	0	0	7.350475254	0	0	0	305.044723	0	182.8430719
F2S4_151223_002_H01	VISp	L2/3	GABAergic	Lamp5	4	Lamp5 Ntn1 Npy2r	Core	0	0	0.749716232	0	0	0	120.7043134	0	0	0	0	0	0	0	0.749716232	0	0	0	0	0	0	0	277.395006	0	0	0	285.6418845	0	0
F2S4_151223_004_C01	VISp	L2/3	GABAergic	Lamp5	4	Lamp5 Ntn1 Npy2r	Core	0	0	286.6224666	0	0	8.925959169	0	0	0	0	0	0	0	0	0	0	0	0	0	0	0	0	24.79433102	0	0	0	167.6096777	0	36.69560992
F2S4_151223_004_F01	VISp	L2/3	GABAergic	Lamp5	4	Lamp5 Ntn1 Npy2r	Core	0	0	71.27796417	55.53050697	0	23.20677903	255.2745693	0	0	0	0	0	0	0	0	0	0	0	127.6372847	0	0	0	104.4305056	0	0	0	534.5847313	0	0
F2S4_151223_007_B01	VISp	L4	GABAergic	Lamp5	4	Lamp5 Ntn1 Npy2r	Core	0	0	226.2602376	40.14294538	0	0	52.91570073	0	0	0	0	0	0	0	0	0	0	0	0	0	0	0	159.6594418	0	0	0	729.8717342	0	0
F2S4_151223_015_E01	VISp	L1	GABAergic	Lamp5	4	Lamp5 Ntn1 Npy2r	Core	0	0	218.8727383	108.0935916	0	0	98.02276008	0	0	0	0	0	0	0	0	0	0	0	21.48444057	0	0	0	2.014166303	0	0	0	485.414079	0	0
F2S4_151223_015_F01	VISp	L1	GABAergic	Lamp5	4	Lamp5 Ntn1 Npy2r	Core	0	0	67.82165617	129.2600976	142.026527	35.90558268	157.9845638	0	0	0	0	0	0	0	0	0	0	0	0	0	0	0	173.1446987	0	0	0	182.7195207	0	0
F2S4_151223_015_H01	VISp	L1	GABAergic	Lamp5	4	Lamp5 Ntn1 Npy2r	Core	0	0.755664841	87.65712161	170.0245893	1.511329683	51.38520922	0	0	0	0	0	0	0	0	0	0	0	0	0	0	0	0	192.6945346	0	0	0	417.8826573	0	0
F2S4_151223_016_F01	VISp	L1	GABAergic	Lamp5	4	Lamp5 Ntn1 Npy2r	Intermediate	57.20699518	0	0	297.6212028	139.0347225	41.27593323	175.2416815	0	0	0	0	0	0	0	0	0	0	0	0	0	0	0	164.3795938	0	0	0	110.0691553	0	0
F2S4_151223_018_A01	VISp	L1	GABAergic	Lamp5	4	Lamp5 Ntn1 Npy2r	Core	0	0	55.51938767	0	0	0	2.281618672	0	0	0	0	0	0	0	0	0.760539557	0	0	0	0	0	0	846.4805271	0	0	0	1.521079114	0	0
F2S4_151223_018_D01	VISp	L1	GABAergic	Lamp5	4	Lamp5 Ntn1 Npy2r	Core	0	0	151.1135256	0	157.9823222	0	0.624436056	0	0	0	0	0	0	0	82.42555942	0	0	0	19.9819538	0	0	0	0	0	0	0	289.7383301	0	0
F2S4_151223_018_F01	VISp	L1	GABAergic	Lamp5	4	Lamp5 Ntn1 Npy2r	Core	0	0	35.79442984	0	0	2.75341768	0	0	0	0	0	0	0	0	0	0	0	0	0	0	0	6.883544199	457.0673348	0	0	0	151.4379724	0	0
F2S4_160114_012_C01	VISp	L1	GABAergic	Lamp5	4	Lamp5 Ntn1 Npy2r	Core	0	0	20.73960806	102.0164504	0	0.560529947	61.65829422	0	0	0	0	25.78437758	0	0	0	0	0	0	17.37642837	0	0	0	10.08953905	0	26.90543748	0	277.462324	0	0
F2S4_160114_012_F01	VISp	L1	GABAergic	Lamp5	4	Lamp5 Ntn1 Npy2r	Core	0	0	126.24353	146.2425051	0	0	206.8643982	0	0	0	0	0	0	0	10.6244555	0	0	0	88.12048383	0	0	0	163.1166403	0	5.624711734	0	179.3658075	0	54.37221342
F2S4_160114_012_G01	VISp	L1	GABAergic	Lamp5	4	Lamp5 Ntn1 Npy2r	Core	0	0	212.8535041	0	2.847538517	0	186.5137728	0	0	0	0	0	0	0	0	0	0	0	0	0	0	0	112.4777714	0	0	0	430.6902006	0	0
F2S4_160114_014_G01	VISp	L1	GABAergic	Lamp5	4	Lamp5 Ntn1 Npy2r	Core	0	0	53.65611685	66.79639037	3.832579775	0	0	0	0	0	0	0	0	0	0	0	0	0	0	0	0	0	222.289627	0	0	0	110.5973021	0	0
F2S4_160114_017_A01	VISp	L2/3	GABAergic	Lamp5	4	Lamp5 Ntn1 Npy2r	Intermediate	0	0	298.9425476	19.72717319	0.758737431	0	276.9391622	0	0	0	0	0.758737431	0	0	0	0	0	0	0	0	0	0	88.01354195	0	0	0	626.7171176	0	0
F2S4_160114_018_D01	VISp	L2/3	GABAergic	Lamp5	4	Lamp5 Ntn1 Npy2r	Core	0	0	357.2714952	381.8885702	0	0	189.810604	0	0	0	0	0	0	0	0	0	0	0	0	0	0	0	13.92808186	0	0	20.40625947	139.6047275	0	0
F2S4_160114_020_F01	VISp	L2/3	GABAergic	Lamp5	4	Lamp5 Ntn1 Npy2r	Core	0	0	287.6695427	0	0	12.95194623	77.71167741	0	0	0	0	0	0	0	0	0	0	0	0	0	0	0	205.867777	0	0	0	208.5945025	0	0
F2S4_160115_008_F01	VISp	L2/3	GABAergic	Lamp5	4	Lamp5 Ntn1 Npy2r	Core	0	0	6.439039467	0	0	0	0	0	0	0	0	0	0	0	0	0	0	0	0	80.84571775	0	0	0	0	0	0	842.0832725	0	0
F2S4_160115_026_G01	VISp	L1	GABAergic	Lamp5	4	Lamp5 Ntn1 Npy2r	Core	0	0	19.54251815	135.0982776	0	62.87592795	65.42495206	0	0	0	0	0	0	0	361.1117484	0	0	0	0	0	0	0	20.39219285	0	0	53.52950623	0	0	0
F2S4_160115_028_B01	VISp	L1	GABAergic	Lamp5	4	Lamp5 Ntn1 Npy2r	Intermediate	0	0	107.1094651	297.526292	0.74381573	63.96815279	170.3338022	0	0	111.5723595	0	0	0	0	0	0	0	0	0	0	0	0	10.41342022	0	0	0.74381573	170.3338022	0	0
F2S4_160115_029_D01	VISp	L1	GABAergic	Lamp5	4	Lamp5 Ntn1 Npy2r	Core	0	0	25.86506406	0	121.6357067	67.80841118	99.96497731	0	0	0	0	0	0	0	0	0	0	0	0	0	0	0	55.92446283	0	0	0	446.6966468	0	0
F2S4_160119_006_F01	VISp	L1	GABAergic	Lamp5	4	Lamp5 Ntn1 Npy2r	Intermediate	0	0	0	0	0	30.05082269	107.3243667	0	0	0	0	0	0	0	0	0	0	0	0	0	0	0	58.87508118	0	0	0	46.60943927	0	0
F2S4_160119_006_H01	VISp	L1	GABAergic	Lamp5	4	Lamp5 Ntn1 Npy2r	Core	0	0	3.558564783	257.9959468	18.38591805	0	0	0	0	0	0	0	0	0	0	0	0	0	0	0	0	0	64.64726023	0	0	0	375.4285846	0	0
F2S4_160121_003_A01	VISp	L2/3	GABAergic	Lamp5	4	Lamp5 Ntn1 Npy2r	Core	0	0	0	476.0720386	0	0	299.1200611	0	0	0	0	0	0	0	0	0	0	0	91.48910294	0	0	0	141.8902854	0	0	0	400.4702649	0	96.96749233
F2S4_160121_007_C01	VISp	L1	GABAergic	Lamp5	4	Lamp5 Ntn1 Npy2r	Core	0	0	0	0	0	37.9048448	41.41455265	0	0	0	0	0	0	0	0	0	0	0	76.51163117	0	0	0	116.5223007	0	0	0	474.5125016	0	0
F2S4_160121_007_F01	VISp	L1	GABAergic	Lamp5	4	Lamp5 Ntn1 Npy2r	Core	0	0	59.2163947	0	0	18.73936541	194.1398256	0	0	0	0	0	0	0	0	0	0	0	5.996596931	0	0	0	19.48894003	0	0	0	216.6270641	0	0
F2S4_160127_002_G01	VISp	L2/3	GABAergic	Lamp5	4	Lamp5 Ntn1 Npy2r	Core	0	0	5.525766303	0	0	14.50513655	0	0	0	0	0	0	0	0	0	0	0	0	0	0	0	0	4.144324727	0	0	0	192.7110998	0	0
F2S4_160127_005_H01	VISp	L2/3	GABAergic	Lamp5	4	Lamp5 Ntn1 Npy2r	Core	0	0	240.4806296	15.89383471	63.57533885	41.46217751	105.7285527	0	0	0	0	0	0	0	225.9688674	0	0	0	0	0	0	0	87.07057277	0	0	0	534.1710536	0	0
F2S4_160129_029_E01	VISp	L2/3	GABAergic	Lamp5	4	Lamp5 Ntn1 Npy2r	Intermediate	0	0	213.5699378	128.9877842	4.229107679	0	74.71423567	0	0	0	0	0	0	0	0	0	0	0	0	0	0	0	14.80187688	0	0	0	541.325783	0	0
F2S4_160129_030_G01	VISp	L2/3	GABAergic	Lamp5	4	Lamp5 Ntn1 Npy2r	Core	0	0	0	0	0	0	145.3390476	0	0	0	0	0	0	0	89.50758422	0	0	0	0	0	0	0	276.498676	0	0	88.62137051	1090.929071	0	0
F2S4_160303_016_A01	VISp	L1	GABAergic	Lamp5	4	Lamp5 Ntn1 Npy2r	Core	0	0	52.72848836	39.54636627	94.38399416	0	95.43856393	0	0	0	0	0	0	0	0	0	0	0	96.4931337	0	0	9.491127905	24.78238953	0	0	0	480.3565289	0	0
F2S4_160303_017_C01	VISp	L1	GABAergic	Lamp5	4	Lamp5 Ntn1 Npy2r	Core	0	0	0	138.8856739	0	9.689698182	55.98492283	0	0	0	0	0	0	0	0	0	0	0	0	0	0	0	41.98869212	0	0	45.21859152	1049.717303	0	0
F2S4_160303_017_H01	VISp	L1	GABAergic	Lamp5	4	Lamp5 Ntn1 Npy2r	Core	0	0	90.44425915	49.2870401	0	53.86006444	74.69273087	0	0	0	0	0	0	0	0	0	0	0	133.6339335	0	0	26.93003222	26.93003222	0	0	0	91.9686006	0	0
F2S4_160303_019_E01	VISp	L1	GABAergic	Lamp5	4	Lamp5 Ntn1 Npy2r	Core	0	0	25.89196191	198.0735086	0	0	0	0	0	0	0	0	0	0	0	0	0	0	0	0	0	0	7.120289524	0	0	0	211.6667886	0	29.77575619
F2S4_160304_001_C01	VISp	L1	GABAergic	Lamp5	4	Lamp5 Ntn1 Npy2r	Core	0	0	0	114.7054606	0	0	0	82.35263841	0	0	0	0	0	0	0	0	0	0	0	0	0	0	47.05865052	0	86.7643869	0	453.6748027	0	0
F2S4_160304_002_C01	VISp	L1	GABAergic	Lamp5	4	Lamp5 Ntn1 Npy2r	Core	0	0	0	0	0	0	252.3196561	0	0	0	0	0	0	0	115.9730096	0	0	0	0	0	0	0	367.5090643	0	0	0	303.2537482	0	0
F2S4_160304_003_F01	VISp	L1	GABAergic	Lamp5	4	Lamp5 Ntn1 Npy2r	Core	0	0	0	0	215.4032421	0	122.5229451	0	0	0	0	0	0	0	0	0	0	0	0	0	0	0	28.32519698	0	0	0	18.44431431	0	0
F2S4_160304_003_G01	VISp	L1	GABAergic	Lamp5	4	Lamp5 Ntn1 Npy2r	Core	0	0	0	0	0	0	2.554587272	0	0	0	0	0	0	0	0.851529091	0	0	0	0	0	0	0	153.2752363	0	0	0	335.5024618	0	0
F2S4_160304_013_C01	VISp	L4	GABAergic	Lamp5	4	Lamp5 Ntn1 Npy2r	Core	0	0	65.17154708	36.962967	0	17.50877384	177.5195126	0	43.7719346	0	0	0	0	0	2.918128974	0	0	0	0	0	0	0	224.2095761	0	0	54.95809567	78.78948229	0	0
F2S4_160304_015_H01	VISp	L2/3	GABAergic	Lamp5	4	Lamp5 Ntn1 Npy2r	Intermediate	0	0	162.6488394	148.3311599	45.24386731	9.736022079	37.79867395	0	0	0	0	0	0	0	0	0	0	0	0	0	0	0	237.6734802	0	0	0	292.6533696	0	0
F2S4_160304_016_F01	VISp	L2/3	GABAergic	Lamp5	4	Lamp5 Ntn1 Npy2r	Core	0	0	17.38182335	214.1124604	0	21.33223775	197.5207199	0	0	0	0	0	0	0	0	0	17.38182335	0	0	0	0	0	26.07273503	0	0	0	636.0167182	0	0
F2S4_160304_019_F01	VISp	L2/3	GABAergic	Lamp5	4	Lamp5 Ntn1 Npy2r	Core	0	0	29.55036512	112.4072712	187.7317314	0	63.73608163	0	0	0	0	0	0	0	0	0	0	0	0	0	0	9.270702783	38.8210679	0	0	53.88595993	516.2622612	0	0
F2S4_160304_021_C01	VISp	L1	GABAergic	Lamp5	4	Lamp5 Ntn1 Npy2r	Core	0	0	0	174.8538411	0	0	0	0	0	0	0	0	0	0	0	0	0	0	18.13836525	0	0	0.72553461	417.1824009	0	0	0	98.67270698	0	0
F2S4_160304_021_G01	VISp	L1	GABAergic	Lamp5	4	Lamp5 Ntn1 Npy2r	Core	0	0	26.63160978	16.34212419	0	147.6843815	142.8422707	0	0	0	0	0	0	0	0	0	0	0	0	0	0	0	30.26319294	0	0	0	474.5268652	0	0
F2S4_160304_021_H01	VISp	L1	GABAergic	Lamp5	4	Lamp5 Ntn1 Npy2r	Intermediate	0	0	68.93279645	0	156.175867	67.8557215	0	0	0	0	0	52.77667228	0	0	0	0	0	0	0	0	0	0	44.6986102	0	0	0	152.9446421	0	0
F2S4_160330_002_F01	VISp	L2/3	GABAergic	Lamp5	4	Lamp5 Ntn1 Npy2r	Core	0	0	141.6163545	154.8395683	42.22897317	0	136.4976911	0	0	0	0	0	0	0	0	0.426555285	0	0	0	0	0	0	45.21486016	0	0	0	279.3937114	0	0
F2S4_160330_003_F01	VISp	L2/3	GABAergic	Lamp5	4	Lamp5 Ntn1 Npy2r	Core	0	0	115.8979651	229.442672	0	0	8.23640361	0	0	0	0	0	0	0	69.42111614	0	0	0	0	0	0	0	135.312345	0	0	0	543.6026382	0	0
F2S4_160330_020_B01	VISp	L2/3	GABAergic	Lamp5	4	Lamp5 Ntn1 Npy2r	Core	0	0	28.73156927	0	0	116.4384649	0	0	0	0	0	0	0	0	0	0	0	0	63.51188996	0	0	0	107.3653378	0	0	0	37.04860247	0	0
F2S4_160330_020_C01	VISp	L2/3	GABAergic	Lamp5	4	Lamp5 Ntn1 Npy2r	Intermediate	0	0	7.443361601	245.6309328	0	11.90937856	83.36564993	0	0	0	0	0	0	0	0	0	0	0	0	0	0	0	107.1844071	0	0	0	198.7377547	0	0
F2S4_160404_006_H01	VISp	L1	GABAergic	Lamp5	4	Lamp5 Ntn1 Npy2r	Intermediate	0	0	41.80380114	287.9295517	0	15.50028582	308.1268938	0	0	0	0	0	0	0	35.22792231	0	0	0	81.25907413	0	0	4.227350677	0	0	0	29.12174911	257.8683913	0	13.15175766
F2S4_160404_016_G01	VISp	L2/3	GABAergic	Lamp5	4	Lamp5 Ntn1 Npy2r	Core	0	0	34.87326134	107.1839944	0	0	234.8816719	0	0	0	0	0	0	0	0	0	72.82357515	0	0	0	0	35.38610342	154.8783077	0	0	0	324.6290357	0	0
F2S4_160404_019_A01	VISp	L2/3	GABAergic	Lamp5	4	Lamp5 Ntn1 Npy2r	Intermediate	0	0	159.0134693	198.6273511	0	109.3566315	0.557941997	0	0	0	0	0	0	0	51.88860576	0	0	0	0	0	0	0	5.579419975	0	0	0	376.6108483	0	0
F2S4_160404_029_C01	VISp	L1	GABAergic	Lamp5	4	Lamp5 Ntn1 Npy2r	Core	0	0	387.606402	0	56.62322439	22.18229409	194.9706902	0	0	0	0	0	0	0	40.27837612	0	0	0	263.8525508	0	0	0	98.06908967	0	0	0	107.409003	0	0
F2S4_160404_029_G01	VISp	L1	GABAergic	Lamp5	4	Lamp5 Ntn1 Npy2r	Core	0	0	0	0	0	28.78426196	76.4271783	0	0	0	0	0	0	0	0	0	0	0	46.15407521	0	0	0	154.8394781	0	0	0	30.27310309	0	0
F2S4_160404_031_A01	VISp	L1	GABAergic	Lamp5	4	Lamp5 Ntn1 Npy2r	Core	0	0	112.9091798	234.5829991	0	56.7123734	84.55299307	0	0	0	0	0	0	0	0	0	0	0	96.41103478	0	0	0	144.3587687	0	0	0	307.7935175	0	0
F2S4_160404_031_B01	VISp	L1	GABAergic	Lamp5	4	Lamp5 Ntn1 Npy2r	Core	0	0	19.15415262	189.3524802	38.30830524	20.79593713	114.3776542	0	0	0	0	0	0	0	0	0	0	0	63.4823344	0	0	0	20.79593713	0	0	0	382.5357909	0	0
F2S4_160404_033_G01	VISp	L1	GABAergic	Lamp5	4	Lamp5 Ntn1 Npy2r	Core	0	0	0	0	0	0	114.5934491	0	0	0	0	43.70540849	0	0	0	0	0	0	0	0	0	0	162.0298071	0	2.131971146	0	287.8161047	0	0
F2S4_160404_046_F01	VISp	L2/3	GABAergic	Lamp5	4	Lamp5 Ntn1 Npy2r	Core	0	0	168.6360828	56.73250934	0	0	119.7107995	0	0	0	0	0	0	0	0	0	0	0	0	0	0	0	81.71563272	0	0	0	358.0914351	0	0
F2S4_160404_050_B01	VISp	L1	GABAergic	Lamp5	4	Lamp5 Ntn1 Npy2r	Core	0.490732035	0	0	521.1574209	0	0	239.967965	0	0	0	0	8.833176626	0	0	45.63807924	0	0	0	0	0	0	0	101.0907992	0	0	0	197.76501	0	117.7756883
F2S4_160405_001_C01	VISp	L1	GABAergic	Lamp5	4	Lamp5 Ntn1 Npy2r	Core	0	0	121.5119399	0	0	0.4602725	221.3910724	0	0	0	0	0	0	0	0.4602725	0	0	0	68.58060246	0	0	0	20.25198999	0	0	0	254.5306924	0	0
F2S4_160405_003_A01	VISp	L1	GABAergic	Lamp5	4	Lamp5 Ntn1 Npy2r	Core	0	0	255.4730407	180.0184845	0	0.383018052	37.15275105	0	0	0	0	0	0	0	0	0	0	0	0	0	0	0	19.91693871	0	0	0	183.0826289	0	0
F2S4_160405_009_C01	VISp	L1	GABAergic	Lamp5	4	Lamp5 Ntn1 Npy2r	Intermediate	0	0	103.8496867	484.0667029	25.8564526	36.87723568	48.32189503	0	0	0	0	0	0	0	0	0	0	0	0	0	0	0	16.53117462	0	0	0	340.3726466	0	0
F2S4_160405_010_D01	VISp	L1	GABAergic	Lamp5	4	Lamp5 Ntn1 Npy2r	Core	0	0	38.90901233	128.8203786	0	29.97045544	34.70263262	0	0	0	0	0	0	0	0	0	0	0	71.50845509	0	0	0	28.91886051	0	0	0	141.9653152	0	0
F2S4_160405_011_E01	VISp	L1	GABAergic	Lamp5	4	Lamp5 Ntn1 Npy2r	Core	0	0	1.023827014	45.04838862	72.69171801	10.23827014	148.4549171	36.345859	0	0	0	0	0	0	0	0	0	0	115.1805391	0	0	0	212.956019	0	15.86931872	0	237.0159538	0	0
F2S4_160405_011_G01	VISp	L1	GABAergic	Lamp5	4	Lamp5 Ntn1 Npy2r	Intermediate	0	0	0	268.3428655	36.04605656	12.01535219	151.0501418	0	0	0	0	0	0	0	0	0	0	16.02046958	74.95291126	0	0	0	145.3285455	0	0	0	181.9467617	0	0
F2S4_160405_012_B01	VISp	L1	GABAergic	Lamp5	4	Lamp5 Ntn1 Npy2r	Core	0	0	14.41883292	6.408370186	90.25121345	49.13083809	165.0155323	0	0	0	0	0	0	0	0	0	0	0	73.69625714	0	0	0	89.18315175	0	0	0	421.3503397	0	0
F2S4_160405_014_E01	VISp	L1	GABAergic	Lamp5	4	Lamp5 Ntn1 Npy2r	Core	0	0	0	207.4269686	0	46.57629061	63.9070034	0	0	0	0	0	0	0	0	0	0	0	0	0	0	0	67.69809682	0	0	0	229.0903596	0	0
F2S4_160405_014_G01	VISp	L1	GABAergic	Lamp5	4	Lamp5 Ntn1 Npy2r	Core	0	0	265.7327791	0	17.34256032	0.55943743	563.3534917	0	0	0	0	0	0	0	0	0	0	0	0	0	0	16.78312289	0	0	0	0	417.89976	0	0
F2S4_160405_015_A01	VISp	L1	GABAergic	Lamp5	4	Lamp5 Ntn1 Npy2r	Core	0	0	31.54523655	36.57418731	0	1.828709366	706.7961698	0	0	15.08685227	0	6.400482779	0	0	0	0	0	0	0	0	0	14.62967492	33.37394592	0	0	11.88661088	0	0	0
F2S4_160405_015_F01	VISp	L1	GABAergic	Lamp5	4	Lamp5 Ntn1 Npy2r	Core	0	0	113.002689	0	0	2.306177327	222.546112	0	0	0	0	0	0	0	0	0	0	0	0	0	0	0	46.70009086	0	7.495076311	0	181.6114645	0	13.83706396
F2S4_160405_015_H01	VISp	L1	GABAergic	Lamp5	4	Lamp5 Ntn1 Npy2r	Core	0	0	0	267.1079884	0	67.33347208	102.3913956	0	0	0	0	0	0	0	0	0	0	0	107.3996703	0	0	0	70.11584696	0	0	0	149.6917685	0	0
F2S4_160405_017_C01	VISp	L1	GABAergic	Lamp5	4	Lamp5 Ntn1 Npy2r	Core	0	0	0	561.1809432	0	19.6485215	0	0	0	0	0	0	0	0	0	0	0	0	103.9933943	0	0	0	51.27784878	0	0	0	496.9638242	0	0
F2S4_160405_017_D01	VISp	L1	GABAergic	Lamp5	4	Lamp5 Ntn1 Npy2r	Core	0	0	101.1688144	202.3376289	0	0	96.81226263	0	0	0	0	0	0	0	0	0	0	38.72490505	0	0	0	0	5.324674445	0	0	0	1.936245253	0	0
F2S4_160405_021_D01	VISp	L1	GABAergic	Lamp5	4	Lamp5 Ntn1 Npy2r	Core	0	0	0	0	0	11.61918133	0	0	0	0	0	0	0	0	15.97637433	0	0	0	66.81029266	38.73060444	0	0	177.1925153	0	18.39703711	0	0	0	39.69886955
F2S4_160405_021_G01	VISp	L1	GABAergic	Lamp5	4	Lamp5 Ntn1 Npy2r	Core	0	0	83.72474652	4.186237326	71.16603454	0	316.0609181	0	0	0	0	0	0	0	0	0	0	0	0	0	0	0	230.2430529	0	0	34.32714607	495.6504994	0	0
F2S4_160405_023_F01	VISp	L1	GABAergic	Lamp5	4	Lamp5 Ntn1 Npy2r	Core	0	0	156.7815199	0	0	0	405.13879	0	0	61.84959043	0	0	0	0	0	0	0	0	0.479454189	0	0	0	71.9181284	0	8.630175408	0	80.54830381	0	0
F2S4_160405_031_B01	VISp	L1	GABAergic	Lamp5	4	Lamp5 Ntn1 Npy2r	Core	0	0	148.1811178	170.0528695	56.86655443	6.014731718	517.8137216	0	0	0	0	0	0	0	1.640381378	0	0	0	0	0	0	0	52.49220409	0	0	0	20.77816412	0	0
F2S4_160405_033_B01	VISp	L1	GABAergic	Lamp5	4	Lamp5 Ntn1 Npy2r	Core	0	0	0	0	174.921334	0	109.3258337	0	0	0	0	0	0	0	0	0	0	0	0	0	0	0	133.1345709	0	0	0	106.8963708	0	0
F2S4_160405_033_D01	VISp	L1	GABAergic	Lamp5	4	Lamp5 Ntn1 Npy2r	Core	0	0	0	58.11318123	18.8867839	44.55343894	191.7734981	0	0	0	0	0.48427651	0	0	0	0	0	0	0	0	0	11.62263625	0	0	0	0	185.9621799	0	0
F2S4_160405_043_A01	VISp	L1	GABAergic	Lamp5	4	Lamp5 Ntn1 Npy2r	Intermediate	0	0	82.16041484	895.009765	0	20.2033807	109.0982558	0	0	0	0	0	0	0	0	0	0	0	0	0	0	0	0	0	0	0	121.2202842	0	0
F2S4_160405_044_D01	VISp	L1	GABAergic	Lamp5	4	Lamp5 Ntn1 Npy2r	Core	0	0	82.3989611	0	0	0.564376446	231.9587192	0	0	0	0	0	0	0	0	0	0	0	0	0	0	0	33.29821031	0	0	0	391.6772534	0	0
F2S4_160405_044_E01	VISp	L1	GABAergic	Lamp5	4	Lamp5 Ntn1 Npy2r	Core	0	0	548.5283777	413.5261724	0	0	115.3416899	0	0	0	0	0	0	0	0	0	0	0	0	0	0	0	90.43837051	0	0	0	509.207347	0	0
F2S4_160405_044_H01	VISp	L1	GABAergic	Lamp5	4	Lamp5 Ntn1 Npy2r	Core	0	0	9.266450411	264.6729899	0	125.0970805	159.2671164	0	0	0	0	0	0	0	0	0	0	0	0	0	0	0	0	0	0	0	233.3987197	0	132.0469184
F2S4_160413_006_B01	VISp	L1	GABAergic	Lamp5	4	Lamp5 Ntn1 Npy2r	Core	0	0	0	32.88571568	0	0.587244923	58.13724736	0	0	0	0	0	0	0	0	0	0	0	0	0	0	0	76.34183997	0	0	0	429.8632835	0	0
F2S4_160413_006_G01	VISp	L1	GABAergic	Lamp5	4	Lamp5 Ntn1 Npy2r	Core	0	0	0	0	0	3.408353078	273.2363051	0	0	0	0	0	0	0	0	0	0	0	0	0	0	3.408353078	0	0	0	0	38.05994271	0	0
F2S4_160413_008_A01	VISp	L1	GABAergic	Lamp5	4	Lamp5 Ntn1 Npy2r	Core	0	0	70.03772787	0	26.86982013	0	0	0	0	0	0	25.54835356	0	0	0	0	0	0	0	0	0	0	26.42933127	0	0	0	340.9383734	0	0
F2S4_160413_008_G01	VISp	L1	GABAergic	Lamp5	4	Lamp5 Ntn1 Npy2r	Core	0	0	186.3279111	27.46666419	112.0936836	18.55855689	237.5495281	0	0	0	0	0	0	0	0	0	0	0	33.03423126	0	0	0	60.87206659	0	0	0	228.2702497	0	0
F2S4_160413_009_C01	VISp	L1	GABAergic	Lamp5	4	Lamp5 Ntn1 Npy2r	Core	0	0	52.70597254	0	47.9145205	3.92027895	0	0	0	0	0	0	0	0	12.1964234	0	0	0	0	0	0	0	227.3761791	0	0	41.8163088	179.4616586	0	0.43558655
F2S4_160413_010_B01	VISp	L1	GABAergic	Lamp5	4	Lamp5 Ntn1 Npy2r	Intermediate	0	0	0	0	51.38268451	19.61171164	0	0	0	0	0	0	0	0	0.392234233	0	0	0	81.58472044	0	0	21.96511704	209.8453146	0	10.19809005	0	22.35735127	0	28.24086477
F2S4_160414_009_G01	VISp	L1	GABAergic	Lamp5	4	Lamp5 Ntn1 Npy2r	Core	0	0	0	30.44113554	60.09159224	26.48774132	0.395339423	0	0	0	0	0	0	0	5.139412494	0	0	0	1.58135769	0	0	0	191.3442805	0	0	0	7.906788452	0	0
F2S4_160414_011_D01	VISp	L2/3	GABAergic	Lamp5	4	Lamp5 Ntn1 Npy2r	Core	0	0	146.2214314	32.00132338	0	0	231.8865125	0	0	0	0	0	0	0	0.492328052	0	0	0	0	0	0	0	98.46561039	0	0	0	220.0706392	0	0
F2S4_160415_016_B01	VISp	L1	GABAergic	Lamp5	4	Lamp5 Ntn1 Npy2r	Core	0	0	268.154668	0	0	0	40.79532983	0	0	0	0	0	0	0	28.35772927	0	0	0	0	0	0	0	15.92012871	0	0	0	300.9899335	0	0
F2S4_160415_017_A01	VISp	L1	GABAergic	Lamp5	4	Lamp5 Ntn1 Npy2r	Core	0	0	0	241.5214329	0	0	0	0	0	0	0	0	0	0	14.26307675	0	0	0	0	0	0	0	2.852615349	0	0	0	416.481841	0	0
F2S4_160415_019_B01	VISp	L1	GABAergic	Lamp5	4	Lamp5 Ntn1 Npy2r	Core	0	0	0	0	0	0	151.755481	0	0	0	0	0	0	0	0	0	0	0	0	0	0	0	47.50606362	0	0	0	357.61509	0	0
F2S4_160415_019_D01	VISp	L1	GABAergic	Lamp5	4	Lamp5 Ntn1 Npy2r	Core	37.44002396	0	51.36003287	173.2801109	0	18.24001167	94.56006052	0	0	0	0	0	0	0	44.64002857	0	0	0	62.40003994	18.24001167	0	0	240.9601542	0	0	0	265.9201702	0	0
F2S4_160415_019_G01	VISp	L1	GABAergic	Lamp5	4	Lamp5 Ntn1 Npy2r	Core	0	0	70.83337023	132.2917356	45.8333572	0	145.3125757	0	0	0	0	14.58334093	0	0	1.562500814	0	0	0	7.812504069	0	0	0	249.4792966	0	6.77083686	0	230.7292868	0	0
F2S4_160415_021_C01	VISp	L1	GABAergic	Lamp5	4	Lamp5 Ntn1 Npy2r	Core	0	0	164.645624	2.110841334	6.332524002	0	61.74210902	0	0	0	0	0	0	0	0	0	0	0	0	0	0	0	0.527710333	0	0	27.44093734	191.558851	0	0
F2S4_160415_021_F01	VISp	L1	GABAergic	Lamp5	4	Lamp5 Ntn1 Npy2r	Core	0	0	107.9342105	174.9770461	90.8168908	146.4481799	58.00869465	0	0	0	0	0	0	0	0	0	0	0	58.48417575	0	0	0	83.68467425	0	0	0	154.0558776	0	0
F2S4_160415_022_A01	VISp	L1	GABAergic	Lamp5	4	Lamp5 Ntn1 Npy2r	Intermediate	0	0	0	0	0.528106906	10.56213811	45.41719389	0	0	0	0	2.640534529	0	0	0	0	0	0	3.168641434	0	0	39.60801793	153.1510027	0	0	0	51.22636986	0	0
F2S4_160415_022_C01	VISp	L1	GABAergic	Lamp5	4	Lamp5 Ntn1 Npy2r	Core	0	0	0	290.8596286	0	0.614925219	54.11341927	0	0	0	0	0	0	0	0	0	0	0	102.0775863	0	0	0	151.2716039	0	0	0	60.26267146	0	0
F2S4_160415_023_F01	VISp	L1	GABAergic	Lamp5	4	Lamp5 Ntn1 Npy2r	Core	0	0	341.6192145	0	133.255722	0	114.4787793	0	0	0.605707827	0	0	0	0	0	0	5.451370444	0	0	0	0	0	39.37100876	0	0	0	251.3687483	0	0
F2S4_160415_023_G01	VISp	L1	GABAergic	Lamp5	4	Lamp5 Ntn1 Npy2r	Core	0	0	0	245.5899147	87.03750929	0.55437904	308.7891253	0	0	0	0	0	0	0	1.10875808	0	0	0	85.92875121	0	0	0	19.4032664	0	0	0	179.618809	0	0
F2S4_160419_001_E01	VISp	L1	GABAergic	Lamp5	4	Lamp5 Ntn1 Npy2r	Core	0	0	225.1926099	109.0876382	0	0	145.4501843	0	0	0	0	0	0	0	89.31151666	0	0	0	0	0	0	0	147.3640025	0	0	0	494.4030386	0	44.01781892
F2S4_160419_002_B01	VISp	L1	GABAergic	Lamp5	4	Lamp5 Ntn1 Npy2r	Core	0	0	40.77097262	0	0.647158296	1.294316591	273.747959	0	0	0	0	0	0	0	0.647158296	0	0	0	40.12381433	0	0	0	9.707374433	0	0	0	189.6173806	0	0
F2S4_160419_002_G01	VISp	L1	GABAergic	Lamp5	4	Lamp5 Ntn1 Npy2r	Core	0	0	81.43744494	301.6887165	85.13914698	1.850851021	40.71872247	0	0	0	0	0	0	0	0	0	0	0	0	0	0	0	146.834181	0	0	0	17.89155987	0	0
F2S4_160429_001_B01	VISp	L1	GABAergic	Lamp5	4	Lamp5 Ntn1 Npy2r	Core	0	0	0	93.36115017	0	0	57.45301549	0	0	0	0	51.29733526	0	0	0	0	0	0	85.15357653	0	0	0	14.36325387	0.512973353	32.31732121	0	392.9375881	0	0
F2S4_160429_001_E01	VISp	L1	GABAergic	Lamp5	4	Lamp5 Ntn1 Npy2r	Core	0	0	0	1.170191478	0	0	0	0	0	0	0	0	0	0	0	0	0	0	35.10574435	0	0	0	0.585095739	0	0	0	0	0	0
F2S4_160429_001_G01	VISp	L1	GABAergic	Lamp5	4	Lamp5 Ntn1 Npy2r	Intermediate	0	0	127.9606505	0	0	50.56006192	96.12653748	0	0	0	0	0	0	0	0	0	0	0	0	0	0	0	46.81487215	0	0	0	387.6271414	0	0
F2S4_160429_001_H01	VISp	L1	GABAergic	Lamp5	4	Lamp5 Ntn1 Npy2r	Core	0	0	31.47533998	45.39712497	0	0	47.81830497	0	0	0	0	0	0	0	0	0	0	0	0	73.84598995	0	0	19.36943999	0	0	0	360.7558198	0	0
F2S4_160429_002_B01	VISp	L1	GABAergic	Lamp5	4	Lamp5 Ntn1 Npy2r	Intermediate	0	0	55.3786372	213.7511884	0	135.0824702	0	0	0	0	0	0	0	0	0	0	0	0	0	0	0	20.18473692	0	0	0	0	207.5405002	0	0
F2S4_160429_002_G01	VISp	L1	GABAergic	Lamp5	4	Lamp5 Ntn1 Npy2r	Core	0	0	0	73.5640457	0	0	40.75130589	0	0	0	0	0	0	0	0	0	0	0	0	0	0	14.28941895	3.175426433	0	0	0	143.4234272	0	0
F2S4_160429_009_F01	VISp	L1	GABAergic	Lamp5	4	Lamp5 Ntn1 Npy2r	Core	0	0	0	0	138.5310171	25.09241064	111.3475722	0	0	0	0	0	0	0	0	0	0	0	0	0	0	0	122.8482604	0	0	0	163.1006692	0	0
F2S4_160429_021_G01	VISp	L2/3	GABAergic	Lamp5	4	Lamp5 Ntn1 Npy2r	Core	0	0	65.98876174	630.886187	0	0	123.9916224	0	0	0	0	0	0	0	15.55149162	0	0	0	78.17776868	0	0	0	448.0510829	0	0	0	260.1722517	0	0
F2S4_160502_007_B01	VISp	L1	GABAergic	Lamp5	4	Lamp5 Ntn1 Npy2r	Core	0	0	0	0	0	0.434421284	29.54064728	0	0	0	0	0	0	0	0	0	0	0	0	0	0	0	51.26171145	0	0	0	202.8747394	0	0
F2S4_160502_008_G01	VISp	L1	GABAergic	Lamp5	4	Lamp5 Ntn1 Npy2r	Intermediate	0	0	111.1476169	0	94.69776962	21.78493292	82.24923653	0	0	0	0	67.57775109	0	0	0	0	0	0	0	90.69645541	0	0	25.78624713	0	8.891809354	0	218.2939196	0	0
F2S4_160502_017_E01	VISp	L1	GABAergic	Lamp5	4	Lamp5 Ntn1 Npy2r	Core	0	0	12.39940979	0.516642075	135.8768656	0	82.66273192	0	0	0	0	0	0	0	0	0	0	0	0	0	0	0	8.266273192	0	0	0	215.4397451	0	0
F2S4_160502_017_G01	VISp	L1	GABAergic	Lamp5	4	Lamp5 Ntn1 Npy2r	Intermediate	0	0	0	0	0	45.8168679	0	0	0	12.49550943	0	0	0.520646226	0	41.65169809	0	0	0	0.520646226	0	0	0	197.3249197	0	0	0	622.6928864	0	0.520646226
F2S4_160502_018_A01	VISp	L1	GABAergic	Lamp5	4	Lamp5 Ntn1 Npy2r	Core	0	0	0	294.0876325	95.09142693	12.98809734	205.9541149	0	0	0	0	0	0	0	0	0	0	0	219.4060729	0	0	0	44.99448006	0	0	0	444.8423338	0	0
F2S4_160502_018_C01	VISp	L1	GABAergic	Lamp5	4	Lamp5 Ntn1 Npy2r	Core	0	0	138.2709666	99.59747785	0	0	161.0512408	0	0	0	0	0	0	0	36.02461965	0	0	0	12.18479782	0	0	0	2.648869092	0	0	0	323.691803	0	29.66733383
F2S4_160502_018_E01	VISp	L1	GABAergic	Lamp5	4	Lamp5 Ntn1 Npy2r	Core	0	0	0	225.9747413	90.59579605	23.67844669	41.69465613	0	0	0	0	0	0	0	0	0	0	0	115.3037404	0	0	0	47.35689339	0	0	0	53.53387948	0	0
F2S4_160502_019_G01	VISp	L1	GABAergic	Lamp5	4	Lamp5 Ntn1 Npy2r	Core	0	0	80.41127926	0	0	0	70.1932714	0	0	0	0	0	0	0	0	0	0	0	0	0	0	0	0	0	0	0	219.9092996	0	0
F2S4_160502_019_H01	VISp	L1	GABAergic	Lamp5	4	Lamp5 Ntn1 Npy2r	Core	0	0	29.60239312	100.7520047	0	0	578.0256762	0	0	0	0	0	0	0	0	0	0	0	0	0	0	0	80.49773568	0	0	0	286.6758071	0	0
F2S4_160502_020_C01	VISp	L1	GABAergic	Lamp5	4	Lamp5 Ntn1 Npy2r	Intermediate	0	0	0	0	0	0	4.580191131	0	0	0	0	0	0	0	0	0	0	0	0	0	0	0	16.03066896	0	0	0	0.572523891	0	0
F2S4_160504_001_H01	VISp	L1	GABAergic	Lamp5	4	Lamp5 Ntn1 Npy2r	Core	0	0	177.0089808	101.8797671	0	0	73.42173158	0	0	0	0	0	0	0	0	0	0	0	0	0	0	0	381.3376757	0	0	0	514.5212818	0	0
F2S4_160504_002_E01	VISp	L1	GABAergic	Lamp5	4	Lamp5 Ntn1 Npy2r	Core	0	0	134.6095328	68.72669809	0	41.70999608	84.36794663	0	0	0	0	0	0	0	0	0	0	0	0.473977228	0	0	0	174.8975972	0	0	0	167.3139616	0	0
F2S4_160504_002_H01	VISp	L1	GABAergic	Lamp5	4	Lamp5 Ntn1 Npy2r	Intermediate	0	0	44.29086046	70.48438009	0	17.14484921	112.3940115	0	0	0	0	0	0	0	0	0	0	0	0	0	0	0	70.9606259	0.476245811	0	0	165.7335424	0	0
F2S4_160504_003_A01	VISp	L1	GABAergic	Lamp5	4	Lamp5 Ntn1 Npy2r	Core	0	0	104.9364741	0	0	0	0	0	0	0	0	0	0	0	0	0	0	0	0	0	0	33.66711877	22.73623605	0	0	0	0	0	0
F2S4_160504_003_H01	VISp	L1	GABAergic	Lamp5	4	Lamp5 Ntn1 Npy2r	Intermediate	0	0	113.2972631	0	0	0	155.1936469	0	0	0	0	0	0	0.590089912	0	0	0	0	0	0	0	0	90.87384645	0	0	0	1.770269736	0	0
F2S4_160504_004_E01	VISp	L1	GABAergic	Lamp5	4	Lamp5 Ntn1 Npy2r	Intermediate	0	0	0	0	0	1.147454172	0	0	0	0	0	0	0	0	0.573727086	0	0	0	121.0564152	0	0	0	22.94908344	0	0	0	611.5930737	0	0
F2S4_160504_004_G01	VISp	L1	GABAergic	Lamp5	4	Lamp5 Ntn1 Npy2r	Core	0	0	0	161.2985513	0	11.8526092	0	0	0	0	0	0	0	0	0	0	0	0	93.27488107	0	0	0	51.53308347	0	0	0	154.5992504	0	0
F2S4_160504_005_D01	VISp	L1	GABAergic	Lamp5	4	Lamp5 Ntn1 Npy2r	Core	0	0	96.89237206	0	0	2.784263565	57.35582944	0	0	0	0	0	0	0	0	0	0	0	0	0	0	0	124.178155	0	0	0	527.3395192	0	0
F2S4_160504_006_A01	VISp	L1	GABAergic	Lamp5	4	Lamp5 Ntn1 Npy2r	Intermediate	0	0	19.98333098	0	92.60568014	60.92478957	71.64755253	0	0	0	0	0	0	0	0	0	0	0	0	0	0	0	144.2699017	0	0	0	419.6499505	0	0
F2S4_160504_009_C01	VISp	L1	GABAergic	Lamp5	4	Lamp5 Ntn1 Npy2r	Core	0	0	0	129.0767535	6.668171768	15.71783345	41.91422254	0	0	0	0	0	0	0	0	0	0	0	0	0	0	0	120.9796878	0	0	0	256.7246131	0	0
F2S4_160504_009_E01	VISp	L1	GABAergic	Lamp5	4	Lamp5 Ntn1 Npy2r	Intermediate	0	0	64.52338813	0	0	31.99506849	93.31894977	0	2.666255708	0	0	0	0	0	0	0	0	0	0	47.99260274	0	0	16.53078539	0	0	0	399.405105	0	0
F2S4_160504_009_H01	VISp	L1	GABAergic	Lamp5	4	Lamp5 Ntn1 Npy2r	Core	0	0	34.24873264	219.5588396	0	0	0	0	0	0	0	0	0	0	0	0	0	0	0	0	0	0	1.223169023	0.611584511	0	0	460.5231372	0	5.504260603
F2S4_160504_010_F01	VISp	L1	GABAergic	Lamp5	4	Lamp5 Ntn1 Npy2r	Intermediate	0	0	6.017985179	84.68164858	0	13.32553861	84.68164858	0	0	0	0	0	0	0	0	0	0	0	11.60611427	0	0	0	179.6798432	0	0	0	402.7751509	0	0.429856084
F2S4_160516_012_H01	VISp	L2/3	GABAergic	Lamp5	4	Lamp5 Ntn1 Npy2r	Core	0	0	82.55933953	733.4341325	0	2.87997696	0	0	0	0	0	0	0	0	0	0	0	0	93.11925505	0	0	0	515.995872	0	0	163.1986944	206.878345	0	0
F2S4_160516_013_D01	VISp	L2/3	GABAergic	Lamp5	4	Lamp5 Ntn1 Npy2r	Core	0	0	0.592959437	328.499528	125.7074006	0	0	0	0	0	0	0	0	0	0	0	0	0	67.00441636	0	0	0	234.811937	0	0	0	278.0979759	0	0
F2S4_161109_001_H01	VISp	L1-L6	GABAergic	Lamp5	4	Lamp5 Ntn1 Npy2r	Core	0	0	41.59387738	73.63240455	0	0	109.6054877	0	0	0	0	0	0	0	0	0	0	0	0	0	0	0	372.0965787	0	0	0	89.93270785	0	0
F2S4_161110_001_B01	VISp	L1-L6	GABAergic	Lamp5	4	Lamp5 Ntn1 Npy2r	Core	0	0	169.326602	426.7958188	0	70.74604605	164.1076314	0	0	0	0	0	0	0	0	0	0	0	0	0	0	0	5.798856234	0	0	0	231.3743637	0	0
F2S4_170519_004_H01	VISp	L1-L4	GABAergic	Lamp5	4	Lamp5 Ntn1 Npy2r	Core	0	0	69.7189889	467.4907202	0	0	67.22902501	0	0	0	0	0	0	0	0	0	0	0	59.75913334	0	0	0	138.1929959	0	0	0	822.3105744	0	0
F2S4_170707_003_A01	VISp	L1	GABAergic	Lamp5	4	Lamp5 Ntn1 Npy2r	Core	0	0	0	35.83535803	0	199.0240654	71.67071606	0	0	0	0	0	0	0	0	0	0	0	157.1242621	0	0	0	125.6994097	0	0	0	274.0026606	0	0
F2S4_170707_003_B01	VISp	L1	GABAergic	Lamp5	4	Lamp5 Ntn1 Npy2r	Core	0	0	148.0636595	0	0	412.6641156	364.8108416	0	0	0	0	0	0	0	0	0	0	0	0	0	0	0	0	0	0	168.3309285	176.7756239	0	0
F2S4_170707_003_E01	VISp	L1	GABAergic	Lamp5	4	Lamp5 Ntn1 Npy2r	Intermediate	0	0	0	359.9849277	0	51.58662516	0	0	0	0	0	0	0	0	0	0	0	0	0	0	0	0	124.4807694	0	0	0	37.5685205	0	0
F2S4_170707_003_F01	VISp	L1	GABAergic	Lamp5	4	Lamp5 Ntn1 Npy2r	Intermediate	0	0	76.92487252	0	0	0	109.2863706	0	0	0	0	0	0	0	0	0	0	0	0	0	0	0	100.7981088	0	0	0	315.1267191	0	0
F2S4_170707_003_H01	VISp	L1	GABAergic	Lamp5	4	Lamp5 Ntn1 Npy2r	Core	0	0	0	0	0.444742521	20.01341343	358.9072143	0	0	0	0	0	0	0	0	0	0	0	0	0	0	0	0	0	0	0	55.5928151	0	0
F2S4_170707_004_A01	VISp	L1	GABAergic	Lamp5	4	Lamp5 Ntn1 Npy2r	Core	0	0	17.23380238	0	0	14.15633767	0	0	0	0	0	0.615492942	0	0	0	0	0	0	91.70844838	0	0	0	40.00704124	0	0	0	224.0394309	0	0
F2S4_170707_004_D01	VISp	L1	GABAergic	Lamp5	4	Lamp5 Ntn1 Npy2r	Core	0	0	131.5022732	514.167656	0	0	132.7487403	0	0	0	0	0	0	0	0	0	0	0	0	0	0	0	111.5588005	0	0	0	60.45365168	0	0
F2S4_170707_004_G01	VISp	L1	GABAergic	Lamp5	4	Lamp5 Ntn1 Npy2r	Core	0	0	73.98849194	214.2044452	0	0	14.48725716	0	0	0	0	0	0	0	42.42696741	0	0	0	111.2414389	0	0	0	246.2833718	0	0	0	0	0	0
F2S4_170707_021_G01	VISp	L1	GABAergic	Lamp5	4	Lamp5 Ntn1 Npy2r	Core	0	0	191.2146857	0	0	0	12.78470283	0	0	0	0	0	0	0	0	0	0	0	0	0	0	0	61.70008755	0	0	0	66.70279735	0	0
F2S4_170707_021_H01	VISp	L1	GABAergic	Lamp5	4	Lamp5 Ntn1 Npy2r	Core	0	0	0.603371034	33.7887779	0	1.206742068	0	0	0	0	0	0	0	0	0	0	0	0	0.603371034	0	0	0	75.42137925	0	0	0	0	0	0
F2S4_170707_022_H01	VISp	L1	GABAergic	Lamp5	4	Lamp5 Ntn1 Npy2r	Core	0	0	165.6603659	6.674959799	0	94.05625171	231.8031494	0	0	0	0	0	0	0	20.63169392	0	0	0	0	0	0	0	0.606814527	0	0	0	350.1319822	0	43.69064595
F2S4_170707_036_B01	VISp	L2/3	GABAergic	Lamp5	4	Lamp5 Ntn1 Npy2r	Core	0	0	0	666.0642294	0	0.576678986	0	0	0	0	0	0	165.5068691	0	0	0	10.95690074	0	0	0	0	0	66.89476243	0	0	76.6983052	258.9288649	0	0
F2S4_170807_005_C01	VISp	L1-L4	GABAergic	Lamp5	4	Lamp5 Ntn1 Npy2r	Intermediate	0	0	5.139109264	0	0	0	107.9212945	0	0	0	0	0	0	0	57.81497922	0	0	0	0	0	0	0	206.8491479	0	0	0	256.9554632	0	0
F2S4_170807_005_F01	VISp	L1-L4	GABAergic	Lamp5	4	Lamp5 Ntn1 Npy2r	Core	0	0	157.206412	0	101.1327873	0	54.07099522	0	0	0	0	0	0	0	0	0	0	0	0	0	0	0	27.03549761	0	0	0	237.3115901	0	0
F2S4_170807_011_F01	VISp	L1-L4	GABAergic	Lamp5	4	Lamp5 Ntn1 Npy2r	Core	0	0	0	0	0	27.68309774	212.2370827	0	0	5.767312029	0	0	0	0	0	0	0	0	102.6581541	0	0	0	164.945124	0	42.67810901	0	99.1977669	0	0
F2S4_170807_012_A01	VISp	L1-L4	GABAergic	Lamp5	4	Lamp5 Ntn1 Npy2r	Core	0	0	109.2364253	0	0	0	247.6025639	0	0	0	0	0	0	0	0	0	0	0	0	0	0	0	142.0073528	0	0	0	631.1437903	0	0
F2S4_171122_007_E01	VISp	L1-L4	GABAergic	Lamp5	4	Lamp5 Ntn1 Npy2r	Core	0	0	0	112.4980824	1.136344267	0	118.1798038	0	0	0	0	0	0	0	0	0	0	0	160.2245416	0	0	0	138.6340006	0	0	0	568.1721334	0	0
F2S4_171122_008_C01	VISp	L1-L4	GABAergic	Lamp5	4	Lamp5 Ntn1 Npy2r	Core	0	0	0	403.5473031	0	84.37807246	0	0	0	0	0	0	0	0	0	0	0	0	0	0	0	0	79.48659	0	0	0	313.0548775	0	0
F2S4_171122_008_F01	VISp	L1-L4	GABAergic	Lamp5	4	Lamp5 Ntn1 Npy2r	Core	0	0	0	117.1585004	0	51.0393467	71.91907944	0	0	1.159985152	0	0	0	0	0	0	0	0	0	0	0	0	0	0	0	0	404.8348181	0	0
F2S4_171122_008_G01	VISp	L1-L4	GABAergic	Lamp5	4	Lamp5 Ntn1 Npy2r	Core	0	0	53.11474762	306.3362188	97.58290842	32.11589391	0	0	0	0	0	0	0	0	0	0	0	0	0	0	0	0	14.82272027	0	0	0	371.8032333	0	0
F2S4_171122_009_D01	VISp	L1-L4	GABAergic	Lamp5	4	Lamp5 Ntn1 Npy2r	Core	0	0	0	0	0	0	0	0	0	0	0	0	0	0	0	0	0	0	90.90648711	0	0	53.54765679	0	0	0	0	227.888865	0	0
F2S4_171122_009_F01	VISp	L1-L4	GABAergic	Lamp5	4	Lamp5 Ntn1 Npy2r	Intermediate	0	0	73.00409837	0	0	0	0	0	0	0	0	0	0	0	0	0	0	0	0	0	0	0	197.7194331	0	0	0	148.0360884	0	0
F2S4_171122_010_G01	VISp	L1-L4	GABAergic	Lamp5	4	Lamp5 Ntn1 Npy2r	Core	0	0	0	0	0	0	12.42258579	0	0	0	0	0	0	0	0	0	0	0	0	0	0	0	49.69034316	0	50.64592668	0	90.78043462	0	0
F2S4_171122_012_D01	VISp	L1-L4	GABAergic	Lamp5	4	Lamp5 Ntn1 Npy2r	Core	0	0	9.256945023	0	23.80357292	1.322420718	219.5218391	0	0	0	0	0	0	0	0	0	0	0	0	0	0	0	0	0	0	0	21.15873148	0	0
F2S4_171122_012_H01	VISp	L1-L4	GABAergic	Lamp5	4	Lamp5 Ntn1 Npy2r	Core	0	0	119.4275784	57.11753751	0	27.69335152	147.1209299	0	0	0	0	0	0	0	0	0	0	0	0	0	0	0	1.73083447	0	0	0	261.356005	0	0
F2S4_171122_013_C01	VISp	L1-L4	GABAergic	Lamp5	4	Lamp5 Ntn1 Npy2r	Core	0	0	193.4587436	0	4.40792074	0	0	0	0	0	0	0	0	0	0	0	0	0	0	0	0	0	140.0739257	0	0	0.489768971	617.5986725	0	0
F2S4_171122_013_F01	VISp	L1-L4	GABAergic	Lamp5	4	Lamp5 Ntn1 Npy2r	Core	0	0	117.194575	0	77.4840165	66.82996423	723.5070041	0	0	0	0	0	0	0	0	0	0	0	0	0	0	0	25.18230536	0	0	0	81.35821733	0	0
F2S4_171122_013_H01	VISp	L1-L4	GABAergic	Lamp5	4	Lamp5 Ntn1 Npy2r	Intermediate	0	0	475.0372183	0	0	0	0	0	0	0	0	0	0	0	0	0	0	0	0	0	0	0	256.3019686	0	0	0	351.4305952	0	0
F2S4_160209_007_D01	ALM	L2/3	GABAergic	Lamp5	5	Lamp5 Plch2 Dock5	Core	0	0	119.4106625	0	0	2.624410164	0	0	0	0	0	0	0	0	250.6311706	0	0	0	0	0	0	0	170.5866606	0	32.14902451	0	135.1571234	0	0
F2S4_160209_007_H01	ALM	L2/3	GABAergic	Lamp5	5	Lamp5 Plch2 Dock5	Core	0	0	0	0.773221783	14.69121388	75.00251297	35.56820203	0	0	0	75.77573475	0	0	0	76.54895654	0	0	0	0	0	0	0	16.23765745	0.773221783	0	0	88.14728329	0	0
F2S4_160209_008_C01	ALM	L2/3	GABAergic	Lamp5	5	Lamp5 Plch2 Dock5	Core	0	0	0	0	0.898526686	64.69392138	0	0	0	0	0	0	0	0	115.0114158	0	0	0	0	111.417309	0	0	35.04254075	0	0	0	0	0	0
F2S4_160308_001_A01	ALM	L1	GABAergic	Lamp5	5	Lamp5 Plch2 Dock5	Core	0	0	6.747074494	0	0	4.152045843	0	0	0	0	0	0	0	0	0	0	0	1.038011461	18.16520056	0	0	0	66.95173921	0	0.51900573	0	313.4794611	0	0
F2S4_160308_002_C01	ALM	L5	GABAergic	Lamp5	5	Lamp5 Plch2 Dock5	Core	0	0	149.874783	0	0	2.487548266	251.864262	0	0	0	0	0	0	0	35.44756279	0	0	0	0	0	0	0	185.3223458	0	0	0	39.17888519	0	0
F2S4_160308_004_E01	ALM	L2/3	GABAergic	Lamp5	5	Lamp5 Plch2 Dock5	Core	0	0	106.6593373	0	91.275779	44.09953367	21.02419629	0	0	0	0	0	0	0	0	0	0	0	59.99587721	0	0	0	116.9150428	0	0	0	713.2843179	0	0
F2S4_160421_001_D01	ALM	L2/3	GABAergic	Lamp5	5	Lamp5 Plch2 Dock5	Intermediate	0	0	0	0	0	0	0	0	39.1825498	0	0	0	0	0	252.13119	0	0	0	0	0	0	0	38.04682371	0	0	0	31.23246723	0	0
F2S4_160503_002_B01	ALM	L1	GABAergic	Lamp5	5	Lamp5 Plch2 Dock5	Core	0	0	164.0928488	66.01986337	0	0	114.3387489	0	0	0	0	0	0	0	0	0	0	0	119.1227969	0	0	0	36.35876533	0	0	0	747.2683086	0	0
F2S4_160503_003_F01	ALM	L1	GABAergic	Lamp5	5	Lamp5 Plch2 Dock5	Core	0	0	0	0	0	11.34781039	0	0	0	0	0	0	0	0	89.75086398	0	0	0	0	246.0411616	0	0	0	0	0	0	0	0	0
F2S4_160503_008_C01	ALM	L2/3	GABAergic	Lamp5	5	Lamp5 Plch2 Dock5	Core	0	0	25.13075848	0	53.85162531	0	25.13075848	0	0	0	0	0	0	0	166.9400385	0	0	0	17.95054177	0	0	0	10.32156152	0	0	0	49.81275341	0	0
F2S4_160505_001_F01	ALM	L1	GABAergic	Lamp5	5	Lamp5 Plch2 Dock5	Core	0	0	0	0	0	0.811685018	45.86020349	0	0	0	0	0	0	0	0	0	0	0	0	80.35681673	0	0	8.116850175	0	13.7986453	0	49.10694356	0	0
F2S4_160505_002_G01	ALM	L1	GABAergic	Lamp5	5	Lamp5 Plch2 Dock5	Core	0	0	89.45171948	0	0	22.57192921	0	0	0	0	0	0	0	0	0	0	0	0	0	0	0	0	20.89993446	0	0	0	361.9868648	0	0
F2S4_160505_003_F01	ALM	L1	GABAergic	Lamp5	5	Lamp5 Plch2 Dock5	Core	0	0	37.84319312	0.425204417	0	39.11880637	0	0	0	0	0	0	0	0	51.44973446	0	0	0	0	0	0	0	0.425204417	0.425204417	0	0	305.2967714	0	0
F2S4_160505_004_C01	ALM	L1	GABAergic	Lamp5	5	Lamp5 Plch2 Dock5	Core	0	0	0	0	0	21.34617321	0	0	0	0	0	0	0	0	82.13636214	0	0	0	0	0	0	0	153.5996377	0	0	0	28.30688187	0	0
F2S4_160505_004_G01	ALM	L1	GABAergic	Lamp5	5	Lamp5 Plch2 Dock5	Core	0	0	0	0	0	41.43798377	151.8201992	0	0.714447996	0	0	0	0	0	70.73035161	0	0	0	0	1.428895992	0	0	11.43116794	0	1.071671994	0	0	0	0
F2S4_160505_005_C01	ALM	L1	GABAergic	Lamp5	5	Lamp5 Plch2 Dock5	Core	0	0	0	0	0	47.70817103	36.73529169	0	0	0	0	0	0	0	66.31435773	0	0	0	0	0	0	0	39.12070024	0	0	0	198.9430732	0	0
F2S4_160505_005_E01	ALM	L1	GABAergic	Lamp5	5	Lamp5 Plch2 Dock5	Intermediate	0	0	0	0	0	2.379340661	0	0	30.93142859	0	0	0	0	0	251.6152749	0	0	0	0	72.56989016	0	0	126.6998902	0	4.758681322	0	0	0	0
F2S4_160505_006_A01	ALM	L1	GABAergic	Lamp5	5	Lamp5 Plch2 Dock5	Core	0	0	60.22279371	0	0	30.62175952	59.71243106	0	0	0	0	0	0	0	191.8963596	0	0	0	73.49222284	15.82124242	0	0	214.3523166	0	0	0	188.8341837	0	0
F2S4_160505_006_G01	ALM	L1	GABAergic	Lamp5	5	Lamp5 Plch2 Dock5	Core	0	0	0	0	0	0	152.1397413	0	0	0	0	0	0	0	0	0	0	0	0	68.81009046	0	0	41.66482542	0	0	0	67.54752	0	0
F2S4_160505_011_A01	ALM	L2/3	GABAergic	Lamp5	5	Lamp5 Plch2 Dock5	Core	0	0	0	0	0	62.29560655	168.0636867	0	11.65241561	0	0	0	0	0	55.57305908	0	0	0	0.896339663	41.23162448	0	0	42.12796414	0	0	0	0	0	0
F2S4_160505_013_D01	ALM	L2/3	GABAergic	Lamp5	5	Lamp5 Plch2 Dock5	Core	0	0	0	0	0	0	41.68092292	0	28.85602356	0	0	0	0	0	67.78875375	0	0	21.06947752	67.33072163	0	0	0	3.66425696	0	12.36686724	0	161.2273062	0	0
F2S4_160505_013_F01	ALM	L2/3	GABAergic	Lamp5	5	Lamp5 Plch2 Dock5	Core	0	0	0	0	0	31.28787978	23.21358823	0	0	0	0	0	0	0	227.5940933	0	0	0	0	0	0	0	3.027859334	0	0	0	143.3186751	0	0
F2S4_160506_002_B01	ALM	L2/3	GABAergic	Lamp5	5	Lamp5 Plch2 Dock5	Core	0	0	134.5333768	0	0	48.44931898	82.6233922	0	0	0	0	0	0	0	22.92690988	0	0	0	0	0	0	0	56.66839988	0	0	12.11232975	182.9826958	0	0
F2S4_160506_014_B01	ALM	L1	GABAergic	Lamp5	5	Lamp5 Plch2 Dock5	Core	0	0	247.8907556	0	0	0	0	0	0	0	0	0	0	0	0	0	0	0	0	0	0	0	1.738364345	0	0	0	76.14035832	0	0
F2S4_160506_014_D01	ALM	L1	GABAergic	Lamp5	5	Lamp5 Plch2 Dock5	Core	0	0	23.59245014	0	0	0	0	0	0	0	0	0	0	0	0.346947796	0	0	0	0	0	0	0	104.7782344	0	0	0	164.8002032	0	0
F2S4_160517_004_H01	ALM	L2/3	GABAergic	Lamp5	5	Lamp5 Plch2 Dock5	Core	0	0	61.27880881	0	0	12.87743084	67.05145022	0	0	0	0	0	0	0	36.41204582	0	0	0	0	0	0	0	268.2058009	0	0	0	134.5469498	0	0
F2S4_160518_008_C01	ALM	L2/3	GABAergic	Lamp5	5	Lamp5 Plch2 Dock5	Core	0	0	0	0	0	0	78.91134476	0	0	0	0	0	0	0	7.087845338	0	0	0	69.46088431	0	0	0	181.9213637	0	0	0	34.02165762	0	0
F2S4_160518_009_E01	ALM	L2/3	GABAergic	Lamp5	5	Lamp5 Plch2 Dock5	Core	0	0	54.5129252	0	0	15.99045806	62.50815423	0	0	0	0	0	0	0	13.08310205	0	0	0	94.85248984	0	0	0	109.3892699	0	15.26361905	0	290.008762	0	0
F2S4_160523_001_B01	ALM	L1	GABAergic	Lamp5	5	Lamp5 Plch2 Dock5	Core	0	0	0	0	0	0.41244631	0	0	0	0	0	0	0	0	0	0	0	0	0	62.69183909	0	0	0	0	0	0	100.2244533	0	0
F2S4_160523_004_A01	ALM	L2/3	GABAergic	Lamp5	5	Lamp5 Plch2 Dock5	Core	0	0	1.22977595	0	98.68952	28.28484685	0	0	0	0	0	0	0	0	0	0	0	0	0	0	0	0	48.26870605	0.307443988	0	0	185.6961685	0	0
F2S4_160524_001_A01	ALM	L1	GABAergic	Lamp5	5	Lamp5 Plch2 Dock5	Core	0	0	0	0	0	1.669954389	0	0	0	0	0	0	0	0	141.5286345	0	0	0	0	0	0	0	37.57397376	0	5.844840363	0	0	0	0
F2S4_160524_001_B01	ALM	L1	GABAergic	Lamp5	5	Lamp5 Plch2 Dock5	Core	0	0	41.19621929	0	0	42.89503246	1.698813167	0	0	0	0	0	0	0	45.01854892	0	0	0	0	0	0	0	0	0	0	0	100.2299768	0	0
F2S4_160524_001_G01	ALM	L1	GABAergic	Lamp5	5	Lamp5 Plch2 Dock5	Intermediate	0	0	78.03226364	0	93.13528241	28.40805911	58.97369234	0	0	0	0	0	0	0	157.1433143	0	0	0	0	0	0	0	66.52520172	0	0	0	150.670592	0	0
F2S4_160524_001_H01	ALM	L1	GABAergic	Lamp5	5	Lamp5 Plch2 Dock5	Core	0	0	18.58837409	0	0	67.53775918	133.216681	0	21.06682397	0	0	0	0	0	0	0	0	0	0	0	0	0	47.71016016	0	0	0	113.3890819	0	0
F2S4_160524_002_G01	ALM	L1	GABAergic	Lamp5	5	Lamp5 Plch2 Dock5	Core	0	0	0	0	0	0	0	0	0	0	0	0	0	0	0	0	0	0	0	0	0	0	133.1243716	0	0	0	84.05107382	0	0
F2S4_160524_002_H01	ALM	L1	GABAergic	Lamp5	5	Lamp5 Plch2 Dock5	Core	0	0	0	0	0	0	0	0	0	0	0	0	0	0	0	0	0	0	0	0	0	0	101.0938018	0	0	0	155.1209811	0	0
F2S4_160524_005_D01	ALM	L2/3	GABAergic	Lamp5	5	Lamp5 Plch2 Dock5	Core	0	0	0	0	0	81.2704405	222.8383046	0	0	0	0	0	0	0	174.9936098	0	0	0	0	0	0	0	85.20288117	0	0	0	0	0	0
F2S4_160524_005_G01	ALM	L2/3	GABAergic	Lamp5	5	Lamp5 Plch2 Dock5	Core	0	0	0	0	0	1.374939932	70.12193655	0	0	0	0	0	0	0	238.5520783	0	0	0	112.0576045	0	0	0	2.749879865	0	0	0	118.2448342	0	0
F2S4_160524_009_A01	ALM	L1	GABAergic	Lamp5	5	Lamp5 Plch2 Dock5	Core	0	0	0.363937837	0	0	0	0	0	0	0	0	0	0	0.363937837	0	0	0	0	152.8538913	0	0	0	42.21678903	0	0	0	422.5318282	0	0
F2S4_160524_009_B01	ALM	L1	GABAergic	Lamp5	5	Lamp5 Plch2 Dock5	Core	0	0	0	0	0	0	0	0	0	0	0	0	0	0	79.97010675	0	0	0	0	0	0	0	26.18490221	0	0	0	0	0	0
F2S4_160524_009_C01	ALM	L1	GABAergic	Lamp5	5	Lamp5 Plch2 Dock5	Core	0	0	24.73633472	0	0	0	0	0	0	0	0	0	0	0	369.3272198	0	0	0	127.1172757	0	0	0	63.90219803	0	0	0	2.404921431	0	0
F2S4_160524_013_G01	ALM	L2/3	GABAergic	Lamp5	5	Lamp5 Plch2 Dock5	Core	0	0	0	0	0	47.65681921	48.06069056	0	0	0	0	0	0	0	424.8726594	0	0	0	56.54198889	0	0	0	158.3175689	0	0	0	0	0	0
F2S4_160524_015_A01	ALM	L2/3	GABAergic	Lamp5	5	Lamp5 Plch2 Dock5	Core	0	0	14.16159799	0	0	7.965898872	45.14009361	0	0	0	0	0	0	0	123.0288826	0	0	0	0	97.36098621	0	0	155.7775779	0	5.310599248	0	58.41659173	0	0
F2S4_160524_016_D01	ALM	L2/3	GABAergic	Lamp5	5	Lamp5 Plch2 Dock5	Core	0	0	39.24384045	0	55.98018417	28.85576504	0	0	0	0	0	0	0	0	190.4480492	0	0	23.66172733	0	0	0	0	164.4778607	0	0	0	355.5030252	0	0
F2S4_160525_001_H01	ALM	L1	GABAergic	Lamp5	5	Lamp5 Plch2 Dock5	Core	0	0	0	0	0	0	47.68585661	0	0	0	0	0	0	0	132.8110221	0	0	0	63.44977615	0	0	0	4.729175862	0	0	1.576391954	93.79532127	0	0
F2S4_160525_002_C01	ALM	L1	GABAergic	Lamp5	5	Lamp5 Plch2 Dock5	Core	0	0	0	3.614865048	0	10.84459514	0	0	0	0	0	0	0	0	59.64527329	0	0	0	0.903716262	0	0	0	93.98649125	0	0	0	0	0	1.807432524
F2S4_160525_008_A01	ALM	L2/3	GABAergic	Lamp5	5	Lamp5 Plch2 Dock5	Core	0	0	17.13668794	0	0	32.36929943	0	0	0	0	0	0	0	0	89.49159255	0	0	19.04076437	112.3405098	0	0	0	97.74259045	0	0	0	408.1070497	0	0
F2S4_160525_019_C01	ALM	L2/3	GABAergic	Lamp5	5	Lamp5 Plch2 Dock5	Core	0	0	145.7747785	0	112.9322395	0	23.62358071	0	0	0	0	0	0	0	0	0	0	0	0	0	0	0	142.8938541	0	0	0	176.312578	0	0
F2S4_160525_022_B01	ALM	L1	GABAergic	Lamp5	5	Lamp5 Plch2 Dock5	Core	0	0	0	0	0	108.4048444	113.9799507	0	0	0	0	0	0	0	29.11444392	0	0	0	0	0	0	0	125.7496195	0	3.716737522	0	122.6523382	0	0
F2S4_160525_022_C01	ALM	L1	GABAergic	Lamp5	5	Lamp5 Plch2 Dock5	Core	0	0	27.32681925	0	0	40.99022888	0	0	0	0	0	0	0	0	0	0	0	0	2.376245152	0	0	0	24.9505741	0	0	0	328.5158923	0	0
F2S4_160525_022_D01	ALM	L1	GABAergic	Lamp5	5	Lamp5 Plch2 Dock5	Core	0	0	0	0	0	62.34537298	0	0	0	0	0	0	0	0	28.77478753	0	0	0	0	0	0	0	26.37688857	0	0	0	62.94484772	0	0
F2S4_160526_007_D01	ALM	L1	GABAergic	Lamp5	5	Lamp5 Plch2 Dock5	Core	0	0	31.16896389	0	0	8.175465938	31.67993051	0	0	0	0	0	0	0	98.61655787	0	0	0	0	0	0	0	56.20632832	0	0	0	1.532899863	0	0
F2S4_160526_007_G01	ALM	L1	GABAergic	Lamp5	5	Lamp5 Plch2 Dock5	Core	0	0	0	0	0.436362811	0	0	0	0	0	0	0	0	0	0	0	0	0	0	0	0	0	115.636145	0	0	0	188.0723716	0	0
F2S4_160526_008_A01	ALM	L1	GABAergic	Lamp5	5	Lamp5 Plch2 Dock5	Core	0	0	0	0	0	93.97000538	0.505215083	0	0	0	0	0	0	0	117.7151143	0	0	0	0	0	0	0	0	0	0	0	0	0	0
F2S4_160526_008_C01	ALM	L1	GABAergic	Lamp5	5	Lamp5 Plch2 Dock5	Core	0	0	0	0	0	27.57909815	130.5697928	0	0	0	0	0	0	0	132.7244098	0	0	0	0	80.15175399	0	0	143.0665716	0	0	0	0	0	0
F2S4_160526_008_D01	ALM	L1	GABAergic	Lamp5	5	Lamp5 Plch2 Dock5	Core	0	0	0	0	0	69.29938324	67.31940086	0	0	0	0	0	0	0	149.1586725	0	0	0	0	0	0	0	34.97968868	0	0	0	151.798649	0	0
F2S4_160526_008_F01	ALM	L1	GABAergic	Lamp5	5	Lamp5 Plch2 Dock5	Core	0	0	0	0	0	8.852014437	0	0	47.07662223	0	0	0	0	0	323.5008912	0	0	0	103.4076232	0	0	0	207.619975	0	0	0	0	0	0
F2S4_160526_008_H01	ALM	L1	GABAergic	Lamp5	5	Lamp5 Plch2 Dock5	Core	0	0	0	0	0	67.10227956	47.93019969	0	0	0	0	0	0	0	0	0	0	0	0	0	0	0	169.0628862	0	5.228749057	0	34.85832704	0	0
F2S4_160526_009_C01	ALM	L1	GABAergic	Lamp5	5	Lamp5 Plch2 Dock5	Core	0	0	9.263633753	0	0	0	0	0	0	0	0	0	0	0	65.95707232	0	0	0	0	49.65307692	0	0	97.45342708	0	0	0	0	0	0
F2S4_160526_009_D01	ALM	L1	GABAergic	Lamp5	5	Lamp5 Plch2 Dock5	Core	0	0	15.69987275	0	0	14.42691009	26.73221576	0	0	0	0	0	0	0	61.95084921	0	0	0	0	0	0	0	119.6584896	0	0	0	0	0	0
F2S4_160526_018_G01	ALM	L2/3	GABAergic	Lamp5	5	Lamp5 Plch2 Dock5	Core	0	0	0	0	0	57.55791299	12.42257115	0	0	0	0	0	0	0	261.7021655	0	0	0	0	148.6567681	0	0	0	0	0	0	0	0	0
F2S4_160526_018_H01	ALM	L2/3	GABAergic	Lamp5	5	Lamp5 Plch2 Dock5	Core	0	0	0	0	0	0	0	0	0	0	0	0	0	0	0	0	0	0	29.60291942	0	0	0	214.5197859	0	0	0	180.861672	0	0
F2S4_160526_022_B01	ALM	L2/3	GABAergic	Lamp5	5	Lamp5 Plch2 Dock5	Core	0	0	0	0	0	16.31352545	32.6270509	0	0	0	0	0	0	0	19.11012981	0	0	0	57.79649017	0	0	0	94.61844761	0	0	0	23.77113709	0	0
F2S4_160531_006_G01	ALM	L2/3	GABAergic	Lamp5	5	Lamp5 Plch2 Dock5	Core	0	0	8.336408963	0	0	7.578553603	33.72456353	0	0	0	0	0	0	0	0	0	0	0	15.15710721	0	0	0	3.789276801	0	0	0	162.1810471	0	0
F2S4_160531_007_B01	ALM	L2/3	GABAergic	Lamp5	5	Lamp5 Plch2 Dock5	Core	0	0	94.60665366	0	0	0	0	0	0	0	0	0	0	0	60.34370342	0	0	0	0	0	0	0	28.63768976	0	0	0	302.2299044	0	0
F2S4_160531_008_D01	ALM	L1	GABAergic	Lamp5	5	Lamp5 Plch2 Dock5	Intermediate	0	0	153.3041041	0	0	0	0	0	0	0	0	0	0	0	0	0	0	0	0	0	0	0	73.18000786	0	0	0	188.0245457	0	0
F2S4_160531_009_G01	ALM	L1	GABAergic	Lamp5	5	Lamp5 Plch2 Dock5	Core	0	0	0	0	0	12.45608411	0	0	0	0	0	0	0	0	0	0	0	0	0	0	0	0	0	0	0	0	81.29233839	0	0
F2S4_160531_009_H01	ALM	L1	GABAergic	Lamp5	5	Lamp5 Plch2 Dock5	Core	0	0	0	0	0	3.737507382	0	0	0	0	0	0	0	0	33.10363681	0	0	0	0	0	0	0	192.748595	0	0	0	0.533929626	0	0
F2S4_160531_011_C01	ALM	L1	GABAergic	Lamp5	5	Lamp5 Plch2 Dock5	Core	0	0	19.89287432	0	4.080589604	0	29.07420093	0	0	0	0	0	0	0	105.585256	0	0	0	103.5449612	0	0	0	29.07420093	0	0	0	15.30221102	0	0
F2S4_160531_012_H01	ALM	L1	GABAergic	Lamp5	5	Lamp5 Plch2 Dock5	Core	0	0	0	0	0	141.5885221	0	0	0	0	0	0	0	0	0	0	0	0	0	0	0	0	140.8661317	0	0	0	231.164934	0	0
F2S4_160531_018_B01	ALM	L1	GABAergic	Lamp5	5	Lamp5 Plch2 Dock5	Core	0	0	0	0	0	0	64.98351043	0	0	0.624841446	0	0	0	0	54.36120584	0	0	0	0	0	0	0	145.588057	0	0	0	329.2914423	0	0
F2S4_160531_018_C01	ALM	L1	GABAergic	Lamp5	5	Lamp5 Plch2 Dock5	Core	0	0	0	0	0	11.06360466	215.2373998	0	0	0	0	0	0	0	248.4282138	0	0	0	0	0	0	0	0	0	0	0	0.502891121	0	0
F2S4_160531_019_C01	ALM	L1	GABAergic	Lamp5	5	Lamp5 Plch2 Dock5	Core	0	0	0	0	0	18.64066449	0	0	17.47562296	0	0	0	0	0	36.69880822	0	0	0	0	0	0	0	27.96099674	0	0	0	401.9393281	0	0
F2S4_160531_019_E01	ALM	L1	GABAergic	Lamp5	5	Lamp5 Plch2 Dock5	Core	0	0	0	0	0	96.8669628	35.96258499	0	0	0	0	0	0	0	139.7900481	0	0	0	0	0	0	0	80.62579538	0	0	0	69.02496151	0	0
F2S4_160531_019_F01	ALM	L1	GABAergic	Lamp5	5	Lamp5 Plch2 Dock5	Core	0	0	51.53480847	0	0	9.587871343	49.73708259	0	0	0	0	0	0	0	0	0	0	19.77498464	0	0	0	0	49.73708259	0	0	0	247.486929	0	0
F2S4_160531_020_A01	ALM	L1	GABAergic	Lamp5	5	Lamp5 Plch2 Dock5	Core	0	0	14.31941211	0	0	72.14780717	130.5269489	0	0	0	0	0	0	0	0	0	0	0	0	0	0	0	79.85825985	0	0	0	160.8180129	0	0
F2S4_160601_001_B01	ALM	L1	GABAergic	Lamp5	5	Lamp5 Plch2 Dock5	Core	0	0	0	0	0	0	10.30581272	0	0	0	0	0	0	0	420.0845567	0	0	0	2.453764934	0	0	0	24.53764934	0	0	0	112.382434	0	0
F2S4_160601_001_D01	ALM	L1	GABAergic	Lamp5	5	Lamp5 Plch2 Dock5	Core	0	0	0	0	0	1.152171959	7.489117736	0	0	0	0	0	0	0	119.2497978	0	0	0	96.20635861	0	0	0	186.6518574	0	0	0	300.7168814	0	0
F2S4_160601_001_E01	ALM	L1	GABAergic	Lamp5	5	Lamp5 Plch2 Dock5	Core	0	0	0	0	0	15.34136454	203.2730801	0	0	0	0	0	0	0	101.6365401	0	0	0	0	0	0	0	5.753011702	0	0	0	0	0	0
F2S4_160601_001_H01	ALM	L1	GABAergic	Lamp5	5	Lamp5 Plch2 Dock5	Intermediate	0	0	36.53042765	0	0	18.99582238	28.73726975	0.487072369	0	0	0	0	0	0	18.02167764	0	0	0	45.29773029	0	0	0	39.93993424	0	0	0	59.90990135	0	0
F2S4_160601_002_F01	ALM	L1	GABAergic	Lamp5	5	Lamp5 Plch2 Dock5	Core	0	0	66.90955976	22.95437452	0	27.83828399	0	0	0	0	0	0	0	0	55.67656798	0	0	0	179.7278686	0	0	0	12.69816463	0	0	0	352.1298729	0	0
F2S4_160601_002_G01	ALM	L1	GABAergic	Lamp5	5	Lamp5 Plch2 Dock5	Core	0	0	0	0	0	15.39503664	20.20598559	0	0	0	0	0	0	0	0	0	0	0	45.22292013	64.46671593	0	0	105.8408769	0	0	0	185.7026295	0	0
F2S4_160601_005_F01	ALM	L2/3	GABAergic	Lamp5	5	Lamp5 Plch2 Dock5	Core	0	0	0	0	46.20526753	5.619559564	124.2547059	0	0	0	0	0	0	0	64.31273723	0	0	0	0	0	0	0	78.67383389	0	0	0	236.0215017	0	0
F2S4_160601_009_E01	ALM	L2/3	GABAergic	Lamp5	5	Lamp5 Plch2 Dock5	Core	0	0	0	0	0.509295146	0	99.31255341	0	2.037180583	0	0	0	0	0	85.56158448	0	0	0	0	0	0	0	36.15995535	0	0	0	39.72502136	0	0
F2S4_160601_009_G01	ALM	L2/3	GABAergic	Lamp5	5	Lamp5 Plch2 Dock5	Core	0	0	0	0	0	11.49514002	38.86452102	0	35.5801953	0	0	0	0	0	328.432572	0	0	18.61117908	0	59.11786295	0	0	104.5510354	0	0	0	4.92648858	0	0
F2S4_160601_010_G01	ALM	L2/3	GABAergic	Lamp5	5	Lamp5 Plch2 Dock5	Core	0	0	64.29070308	0	0	16.55972655	443.2162106	0	0	0	0	0	0	0	0	0	0	0	0	0	0	0	0	0	13.15037108	0	97.41015618	0	0
F2S4_160601_014_B01	ALM	L1	GABAergic	Lamp5	5	Lamp5 Plch2 Dock5	Core	0	0	25.43440813	0	0	94.22292103	123.7037123	0	0	0	0	0	0	0	94.22292103	0	0	0	141.0453542	0	0	0	89.59848318	0	0	0	297.6981861	0	0
F2S4_160601_015_A01	ALM	L1	GABAergic	Lamp5	5	Lamp5 Plch2 Dock5	Core	0	0	0	0	0	1.702573951	0	0	0	0	0	0	0	0	0	0	0	0	15.32316556	0	0	0	191.8233318	0	0	0	298.5179661	0	0
F2S4_160601_016_E01	ALM	L1	GABAergic	Lamp5	5	Lamp5 Plch2 Dock5	Core	0	0	0	0	0	35.71386055	52.57873914	0	0	0	0	0	0	0	10.9125685	0	0	0	0	0	0	0	149.799804	0	0	0	177.5772511	0	0
F2S4_160601_017_H01	ALM	L1	GABAergic	Lamp5	5	Lamp5 Plch2 Dock5	Core	0	0	61.5635676	0	0	0	37.21379833	0	0	0	0	0	0	0	0	0	0	0	0	0	0	0	104.7499508	0	0	0	446.1061503	0	0
F2S4_160601_018_F01	ALM	L1	GABAergic	Lamp5	5	Lamp5 Plch2 Dock5	Core	0	0	0	0	0	30.42821348	197.5067675	0	0	0	0	0	0	0	16.04396711	0	0	0	2.766201226	0	0	0	2.766201226	0	0	0	0	0	0
F2S4_160602_001_B01	ALM	L1	GABAergic	Lamp5	5	Lamp5 Plch2 Dock5	Core	0	0	0	0	0	28.77910355	36.3811309	0	0	0	0	0	0	0	25.52109182	0	0	0	38.55313871	0	0	0	37.46713481	0	0	0	332.8601976	0	0
F2S4_160602_001_H01	ALM	L1	GABAergic	Lamp5	5	Lamp5 Plch2 Dock5	Core	0	0	0	0	0	16.64895562	0	0	0	0	0	0	0	0	202.6579771	0	0	0	150.9888044	0	0	0	64.29941482	0	0	0	43.63174577	0	0
F2S4_160602_002_F01	ALM	L1	GABAergic	Lamp5	5	Lamp5 Plch2 Dock5	Core	0	0	5.489320527	0	0	60.88155493	0	0	0	0	0	0	0	0	0	0	0	0	57.8873801	0	0	0	117.7708768	0	0	0	407.2077773	0	0
F2S4_160602_006_A01	ALM	L2/3	GABAergic	Lamp5	5	Lamp5 Plch2 Dock5	Core	0	0	61.39850764	0	44.69143073	0	26.73132305	0	0	0	0	0	0	0	0	0	0	0	49.28587688	0	0	0	77.68790763	0	0	0	381.7567074	0	0
F2S4_160602_010_B01	ALM	L5	GABAergic	Lamp5	5	Lamp5 Plch2 Dock5	Core	0	0	163.7034657	0	52.13843258	14.57633599	0	0	0	0	0	0	0	0	53.82031751	0	0	0	0	0	0	0	30.2739286	0	0	34.19832675	35.88021167	0	0
F2S4_160602_014_A01	ALM	L1	GABAergic	Lamp5	5	Lamp5 Plch2 Dock5	Core	0	0	0	0	0	0	293.2170544	0	0	0.609598866	0	0	0	0	0	0	0	0	25.60315236	0	0	0	418.1848218	0	0	0	0	0	0
F2S4_160602_014_C01	ALM	L1	GABAergic	Lamp5	5	Lamp5 Plch2 Dock5	Core	0	0	0	0	0	2.567599767	0	0	0	0	0	0	0	0	69.3251937	0	0	0	153.542466	298.3550929	0	0	443.1677197	0	22.08135799	0	181.2725435	0	0
F2S4_160602_014_D01	ALM	L1	GABAergic	Lamp5	5	Lamp5 Plch2 Dock5	Core	0	0	0	0	0	1.373955393	0	0	0	0	0	0	0	0	31.60097404	0	0	0	0	0	0	0	122.28203	0	0	0	14.65552419	0	0
F2S4_160602_014_E01	ALM	L1	GABAergic	Lamp5	5	Lamp5 Plch2 Dock5	Core	0	0	0	0	0	0.537936058	0	0	0	0	0	0	0	0	11.83459327	0	0	0	0	0	0	0	7.531104808	0	0	0	24.74505865	0	0
F2S4_160602_014_F01	ALM	L1	GABAergic	Lamp5	5	Lamp5 Plch2 Dock5	Core	0	0	0	0	0	0	0	0	0	0.521793488	0	0	0	0	0	0	0	0	2.087173951	0	0	0	247.3301132	0	0	0	400.7373986	0	0
F2S4_160613_003_B01	ALM	L1	GABAergic	Lamp5	5	Lamp5 Plch2 Dock5	Core	0	0	0	0	0	83.6309403	13.93849005	0	0	0	0	0	0	0	121.8102826	0	0	0	0	0	0	0	106.0537286	0	55.14793889	0	15.75655397	0	0
F2S4_160613_003_D01	ALM	L1	GABAergic	Lamp5	5	Lamp5 Plch2 Dock5	Core	0	0	0	0	0	0	0	0	0	0	0	0	0	0	84.30671671	0	0	40.56864563	0	76.70009565	0	0	25.35540352	0	8.874391233	0	0	0	0
F2S4_160613_003_G01	ALM	L1	GABAergic	Lamp5	5	Lamp5 Plch2 Dock5	Core	0	0	0	0	0	0	0	0	0	0	0	0	0	0	62.93119974	0	0	0	0	23.72022144	0	0	0	0	0	0	0.484086152	0	0
F2S4_160613_004_F01	ALM	L1	GABAergic	Lamp5	5	Lamp5 Plch2 Dock5	Core	0	0	0	0	0	163.5973094	115.0206339	0	0	0	0	0	0	0	79.28606804	0	0	0	78.72771545	65.88560584	0	0	64.76890065	0	0	0	0	0	0
F2S4_160613_005_C01	ALM	L1	GABAergic	Lamp5	5	Lamp5 Plch2 Dock5	Core	0	0	32.72398283	0	0	27.59080905	0	0	0	0	0	0	0	0	147.5787461	0	0	0	0	0	0	0	116.1380567	0	0	0	337.5061758	0	0
F2S4_160613_005_E01	ALM	L1	GABAergic	Lamp5	5	Lamp5 Plch2 Dock5	Core	0	0	0	0	0	17.46124276	0	0	0	0	0	0	0	0	10.74538016	0	0	0	0	0	0	0	34.92248551	0	54.39848705	0	78.57559241	0	0
F2S4_160613_005_G01	ALM	L1	GABAergic	Lamp5	5	Lamp5 Plch2 Dock5	Core	0	0	0	0	0	0	0	0	0	0	0	0	0	0	15.98815845	0	0	0	1.031494093	60.34240446	0	0	0	0	0	0	0	0	0
F2S4_160613_006_C01	ALM	L1	GABAergic	Lamp5	5	Lamp5 Plch2 Dock5	Core	0	0	0	0	0	38.49860571	0	0	0	0	0	0	0	0	22.45752	0	0	0	0	0	0	0	138.5949806	0	0	0	267.5653097	0	0
F2S4_160613_007_E01	ALM	L5	GABAergic	Lamp5	5	Lamp5 Plch2 Dock5	Core	0	0	0	0	0	304.4761009	132.9721929	0	0	0	0	0	0	0	61.19742971	0	0	0	58.93085824	0	0	0	28.7099053	0	0	0	0	0	0
F2S4_160613_012_F01	ALM	L2/3	GABAergic	Lamp5	5	Lamp5 Plch2 Dock5	Core	0	0	16.58747682	0	0	30.71754967	91.53829803	0	0	0	18.4305298	0	0	0	181.2335431	0	0	0	0	0	0	0	48.53372848	0	0	0	102.5966159	0	0
F2S4_160620_003_B01	ALM	L2/3	GABAergic	Lamp5	5	Lamp5 Plch2 Dock5	Core	0	0	285.0952014	0	78.59767458	0	47.51586691	0	0	0	0	0	0	0	91.8163744	0	0	0	0	0	0	0	47.87312906	0	0	0	265.4457828	0	0
F2S4_160620_013_H01	ALM	L2/3	GABAergic	Lamp5	5	Lamp5 Plch2 Dock5	Core	0	0	64.28364619	0	0	34.45603436	0	0	0	0	0	0	0	0	72.5119529	0	0	2.057076678	0	0	0	0	37.0273802	0	0	0	126.5102157	0	0
F2S4_160620_014_G01	ALM	L2/3	GABAergic	Lamp5	5	Lamp5 Plch2 Dock5	Core	0	0	0	0	0	4.474740926	88.93547591	0	0	0	0	0	0	0	59.84965989	0	0	0	0	0	0	0	71.03651221	0	0	0	243.8733805	0	0
F2S4_160620_016_D01	ALM	L2/3	GABAergic	Lamp5	5	Lamp5 Plch2 Dock5	Core	0	0	68.23310378	0	0.487379313	39.47772433	70.18262103	0	0	0	0	0	0	0	0	0	0	0	0	0	0	0	160.8351732	0	0	0	421.5831055	0	0
F2S4_160623_028_B01	ALM	L2/3	GABAergic	Lamp5	5	Lamp5 Plch2 Dock5	Core	0	0	0	0	0	0	0	0	0	0	0	0	0	0	150.5993027	0	0	0	0	46.07375927	0	0	65.32846464	0	0	0	0	0	0
F2S4_160629_013_A01	ALM	L1	GABAergic	Lamp5	5	Lamp5 Plch2 Dock5	Core	0	0	0	0	0	19.19730366	90.79805786	0	0	0	0	0	0	0	119.3345903	0	0	0	0	61.2238333	0	0	74.19498442	0	0	0	0	0	0
F2S4_160629_015_A01	ALM	L1	GABAergic	Lamp5	5	Lamp5 Plch2 Dock5	Core	0	0	0	0	0	53.99276497	95.1736874	0	0	0	0	0	0	0	32.94473795	0	0	0	0	0	0	0	75.04079199	0	0	0	0	0	0
F2S4_160629_015_D01	ALM	L1	GABAergic	Lamp5	5	Lamp5 Plch2 Dock5	Core	0	0	0	0	0	14.86551487	0	0	0	0	0	0	0	0	191.1280484	0	0	0	65.83299443	67.42572817	0	0	185.2880247	0	0	0	0	0	0
F2S4_160629_015_E01	ALM	L1	GABAergic	Lamp5	5	Lamp5 Plch2 Dock5	Core	0	0	0	0	0	19.30633742	126.1975227	0	0	0	0	0	0	0	36.72912973	0	0	0	0	0	0	0	0	0	0	0	315.4938067	0	0
F2S4_160629_015_G01	ALM	L1	GABAergic	Lamp5	5	Lamp5 Plch2 Dock5	Core	0	0	0	0	0	87.03373604	0	0	0	0	0	0	0	0	0	0	0	0	0	0	0	0	393.8551979	0	0	0	135.5082219	0	0
F2S4_160629_016_B01	ALM	L1	GABAergic	Lamp5	5	Lamp5 Plch2 Dock5	Core	0	0	0	0	33.90271885	4.422093763	0	0	0	0	0	0	0	0	66.8227502	0	0	0	63.38334394	0	0	0	43.23825013	0	0	0	127.7493754	0	0
F2S4_160629_016_D01	ALM	L1	GABAergic	Lamp5	5	Lamp5 Plch2 Dock5	Core	0	0	55.47561475	0	0	2.859567771	0	0	0	0	0	0	0	0	0	0	0	0	89.21851444	57.76326897	0	0	112.6669702	0	0	0	320.2715903	0	0
F2S4_160629_016_G01	ALM	L1	GABAergic	Lamp5	5	Lamp5 Plch2 Dock5	Core	0	0	0	0	0	1.909310306	52.8242518	0	0	0	0	0	0	0	67.46229749	0	0	0	58.55218272	5.727930919	0	0	52.8242518	0	12.72873537	0	136.1974685	0	0
F2S4_160629_017_C01	ALM	L1	GABAergic	Lamp5	5	Lamp5 Plch2 Dock5	Core	0	0	18.51235726	0	0	0	0	0	0	0	0	0	0	0	0	0	0	0	0	0	0	0	165.582751	0	0	0	242.2033408	0	0
F2S4_160629_018_B01	ALM	L1	GABAergic	Lamp5	5	Lamp5 Plch2 Dock5	Core	0	0	0	0	0	0	0	0	0	0	0	0	0	0	0	0	0	0	0	0	0	0	59.35580644	0	0	0	0	0	0
F2S4_160629_018_D01	ALM	L1	GABAergic	Lamp5	5	Lamp5 Plch2 Dock5	Core	0	0	28.82191572	0	0	1.729314943	102.0295817	0	4.035068201	0	0	0	0	0	0	0	0	0	27.09260078	0	0	0	138.3451955	0	16.71671112	0	109.5232797	0	0
F2S4_160629_018_E01	ALM	L1	GABAergic	Lamp5	5	Lamp5 Plch2 Dock5	Core	0	0	0	0	0	20.72407403	0	0	0	0	0	0	0	0	73.47626246	0	0	0	0.628002243	0	0	0	0.628002243	0	0	0	0	0	0
F2S4_160629_018_F01	ALM	L1	GABAergic	Lamp5	5	Lamp5 Plch2 Dock5	Core	0	0	0	0	0	0.62498086	0	0	0	0	0	0	0	0	18.7494258	0	0	0	0	125.6211529	0	0	0	0	0	0	0	0	0
F2S4_160629_019_A01	ALM	L1	GABAergic	Lamp5	5	Lamp5 Plch2 Dock5	Core	0	0	0	0	0	25.94004884	38.64537889	0	0	0.529388752	0	0	0	0	0	0	0	0	0	37.58660138	0	0	81.52586779	0	0	0	161.9929581	0	0
F2S4_160629_019_E01	ALM	L1	GABAergic	Lamp5	5	Lamp5 Plch2 Dock5	Core	0	0	0	0	0	13.93758855	0	0	0	0	0	0	0	0	70.22400385	0	0	0	0	1.608183294	0	0	100.2434253	0	0	0	1.072122196	0	0
F2S4_160629_019_F01	ALM	L1	GABAergic	Lamp5	5	Lamp5 Plch2 Dock5	Core	0	0	0	0	0	16.63260064	37.57735699	0	9.856355933	0	0	0	0	0	33.26520127	0	0	0	56.67404661	28.33702331	0	0	121.9724047	0	0	0	24.64088983	0	0
F2S4_160630_001_A01	ALM	L1	GABAergic	Lamp5	5	Lamp5 Plch2 Dock5	Core	0	0	0	0	0	9.386903767	0	0	46.46517365	0	0	0	0	0	49.75058997	0	0	0	0	15.9577364	0	0	0	0	0	0	133.2940335	0	0
F2S4_160630_001_E01	ALM	L1	GABAergic	Lamp5	5	Lamp5 Plch2 Dock5	Core	0	0	0.474571509	0	0	11.86428773	0	0	0	0	0	0	0	0	100.1345885	0	0	0	0	45.08429339	0	0	87.79572924	0	0	0	33.69457717	0	0
F2S4_160630_001_F01	ALM	L1	GABAergic	Lamp5	5	Lamp5 Plch2 Dock5	Core	0	0	0	0	0	6.053943665	0	0	0.504495305	0	0	0	0	0	157.4025353	0	0	0	28.2517371	40.35962443	0	0	0	0	0	0	0	0	0
F2S4_160630_001_G01	ALM	L1	GABAergic	Lamp5	5	Lamp5 Plch2 Dock5	Core	0	0	0	0	23.95176985	13.06460173	6.532300867	0	0	0	0	0	0	0	0	0	0	0	0	0	0	0	38.6494468	0	0	0	58.7907078	0	0
F2S4_160630_002_D01	ALM	L1	GABAergic	Lamp5	5	Lamp5 Plch2 Dock5	Core	0	0	0	0	0	1.475713446	0	0	0	0	0	0	0	0	60.50425128	0	0	0	0	0	0	0	44.27140338	0	23.11951065	0	69.85043644	0	0
F2S4_160630_003_B01	ALM	L1	GABAergic	Lamp5	5	Lamp5 Plch2 Dock5	Core	0	0	0	0	0	0	79.43854884	0	0	0	0	0	0	0	0	0	0	0	0	0	0	0	11.53140225	0	0	0	582.3358137	0	0
F2S4_160630_004_C01	ALM	L1	GABAergic	Lamp5	5	Lamp5 Plch2 Dock5	Core	0	0	184.1979571	0	0.535459178	0.535459178	0.535459178	0	0	0	0	0	0	0	0	0	0	0	0	0	0	0	5.890050954	0	0	0	152.0704065	0	0
F2S4_160706_048_A01	ALM	L5	GABAergic	Lamp5	5	Lamp5 Plch2 Dock5	Core	0	0	0	0	0	0	183.286809	0	0	0.458217023	0	0	0	0	0	0	0	0	0	0	0	0	91.18518749	0	0	0	224.068124	0	0
F2S4_160707_001_C01	ALM	L1	GABAergic	Lamp5	5	Lamp5 Plch2 Dock5	Core	0	0	46.64458403	0	0	6.303322166	10.71564768	0	0	0	0	0	0	0	47.90524846	0	0	0	0	0	0	0	65.55455053	0	0	0	396.4789642	0	0
F2S4_160707_003_D01	ALM	L1	GABAergic	Lamp5	5	Lamp5 Plch2 Dock5	Core	0	0	48.75687884	73.13531826	0	15.05727141	0	0	0	0	0	0	0	0	134.7984297	0	0	0	0	0	0	0	0	0	0	0	224.4250453	0	0
F2S4_160707_004_B01	ALM	L1	GABAergic	Lamp5	5	Lamp5 Plch2 Dock5	Core	0	0	0	0	0	21.47974668	0	0	0	0	0	0	0	0	125.4140048	0	0	0	0	0	0	0	96.31241252	0	0	0	383.86386	0	0
F2S4_160707_004_E01	ALM	L1	GABAergic	Lamp5	5	Lamp5 Plch2 Dock5	Core	0	0	0	0	0.586064786	0	0	0	0	0	0	0	0	0	4.688518288	0	0	0	39.26634066	0	0	0	46.29911809	0	0	0	276.0365142	0	0
F2S4_160707_004_G01	ALM	L1	GABAergic	Lamp5	5	Lamp5 Plch2 Dock5	Core	0	0	0	0	0	60.39667841	20.32580524	0	0	0	0	0	0	0	0	0	0	0	3.484423755	0	0	0	131.8273654	0	1.161474585	0	230.5527051	0	0
F2S4_160707_004_H01	ALM	L1	GABAergic	Lamp5	5	Lamp5 Plch2 Dock5	Core	0	0	151.1373082	139.0463236	0	52.14237134	150.3816217	0	0	0	0	0	0	0	0	0	0	0	0	0	0	0	31.73883473	0	0	0	523.6907731	0	0
F2S4_160707_007_D01	ALM	L1	GABAergic	Lamp5	5	Lamp5 Plch2 Dock5	Core	0	0	0	0	0	3.368087506	39.06981507	0	0	0	0	0	0	0	0	0	0	0	70.72983762	0	0	0	217.5784529	0	3.368087506	0	143.4805277	0	0
F2S4_160707_007_E01	ALM	L1	GABAergic	Lamp5	5	Lamp5 Plch2 Dock5	Core	0	0	0	0	0	20.37867657	26.49227954	0	0	0	0	0	0	0	86.94902002	0	0	0	16.98223047	0	0	0	117.5170349	0	12.22720594	0	35.32303938	0	0
F2S4_160708_004_C01	ALM	L1	GABAergic	Lamp5	5	Lamp5 Plch2 Dock5	Core	0	0	0	0	0	0	324.031097	0	0	0	0	0	0	0	0	0	0	0	0	0	0	0	0	0	0	0	243.9616367	0	0
F2S4_160721_002_C01	ALM	L1	GABAergic	Lamp5	5	Lamp5 Plch2 Dock5	Core	0	0	10.2102654	0	0	9.609661554	83.48393475	0	0	0	0	0	0	0	377.7798198	0	0	0	0	0	0	0	0.600603847	0	0	0	97.29782323	0	0
F2S4_160721_004_B01	ALM	L1	GABAergic	Lamp5	5	Lamp5 Plch2 Dock5	Core	72.15606842	0	30.27977871	0	112.0996063	1.288501222	0	0	0	0	0	0	0	0	78.59857453	0	0	0	0	0	0	0	56.69405376	0	0	0	204.2274437	0	0
F2S4_160721_004_D01	ALM	L1	GABAergic	Lamp5	5	Lamp5 Plch2 Dock5	Core	0	0	0	0	0	38.98909993	82.63361477	0	0	0	0	0	0	0	0	0	0	0	86.70710282	0	0	0	25.60478204	0	33.16983128	0	261.8670891	0	0
F2S4_160721_004_E01	ALM	L1	GABAergic	Lamp5	5	Lamp5 Plch2 Dock5	Core	0	0	0	0	0	0	101.6331045	0	0	0	0	0	0	0	206.5875523	0	0	0	60.44844777	0	0	0	2.657074627	0	0	0	0	0	0
F2S4_160721_005_A01	ALM	L1	GABAergic	Lamp5	5	Lamp5 Plch2 Dock5	Core	0	0	0	0	0	19.34125081	16.57821498	0	0	0	0	0	0	0	0	0	0	0	0	0	0	0	145.0593811	0	0	0	396.4956417	0	0
F2S4_160721_005_G01	ALM	L1	GABAergic	Lamp5	5	Lamp5 Plch2 Dock5	Core	14.75510364	0	201.8498178	0	0	0	0	0	0	0	0	0	0	0	0	0	0	0	0	0	0	0	278.5763568	0	0	0	106.8269504	0	0
F2S4_160721_006_D01	ALM	L1	GABAergic	Lamp5	5	Lamp5 Plch2 Dock5	Core	0	0	0	0	0	46.4883537	0	0	0	0	0	0	0	0	43.2599958	0	0	0	1.937014737	0	0	0	1.291343158	0	0	0	0	0	0
F2S4_160725_001_B01	ALM	L1	GABAergic	Lamp5	5	Lamp5 Plch2 Dock5	Core	0	0	129.9737912	0	0	49.44101076	0	0	0	0	0	0	0	0	25.99475823	0	0	0	0	0	0	0	64.73204501	0	0	0	0	0	0
F2S4_160725_001_E01	ALM	L1	GABAergic	Lamp5	5	Lamp5 Plch2 Dock5	Core	0	0	0	0	0	42.64780756	0	0	0	0	0	0	0	0	231.6671028	0	0	0	0	0	0	0	122.1517451	0	0	0	153.7427137	0	0
F2S4_160725_001_H01	ALM	L1	GABAergic	Lamp5	5	Lamp5 Plch2 Dock5	Core	0	0	0	0	0	14.51456833	0	0	0	0	0	0	0	0	0	0	0	0	10.21395549	0	0	0	100.5268251	0	0	0	175.7875497	0	0
F2S4_160725_002_A01	ALM	L1	GABAergic	Lamp5	5	Lamp5 Plch2 Dock5	Core	0	0	0	0	0	32.85748949	0	0	0	0	0	0	0	0	425.2517389	0	0	0	0	0	0	0	0	0	0	0	96.04496927	0	0
F2S4_160808_019_G01	ALM	L5	GABAergic	Lamp5	5	Lamp5 Plch2 Dock5	Core	0	0	65.56732125	0	0	46.32473784	51.31355576	0	0	0.712688274	0	0	0	0	24.9440896	0	0	0	0	0	0	0	38.48516682	0	0	0	602.9342802	0	0
F2S4_160808_019_H01	ALM	L5	GABAergic	Lamp5	5	Lamp5 Plch2 Dock5	Core	0	0	45.51583667	0.711184948	0	9.956589271	0	0	0	0	0	0	0	0	202.6877102	0	0	71.11849479	24.18028823	0	0	0	47.64939151	0	0	0	206.2436349	0	0
F2S4_160808_020_D01	ALM	L5	GABAergic	Lamp5	5	Lamp5 Plch2 Dock5	Core	0	0	21.90549545	0	0	20.49223768	74.19603299	0	0	0	0	0	0	0	147.6854371	0	0	0	0	0	0	0	0	0	0	0	55.11705307	0	0
F2S4_160819_001_B01	ALM	L1	GABAergic	Lamp5	5	Lamp5 Plch2 Dock5	Core	0	0	0	0.52632133	0	5.789534627	0	0	0	0	0	0	0	0	80.52716344	0	0	0	10.00010526	195.2652133	0	0	23.15813851	0	0	0	0	0	0
F2S4_160819_002_F01	ALM	L1	GABAergic	Lamp5	5	Lamp5 Plch2 Dock5	Core	0	0	0	0	0	31.67680221	0	0	0	0	0	0	0	0	277.0167409	0	0	0	1.863341306	0	0	0	162.1106937	0	0	0	0	0	0
F2S4_160819_002_G01	ALM	L1	GABAergic	Lamp5	5	Lamp5 Plch2 Dock5	Core	0	0	0	0	0	0	0	0	0	0	0	0	0	0	28.21501836	0	0	0	134.9894996	0	0	0	0	0	0	0	344.6658125	0	0
F2S4_160819_004_H01	ALM	L1	GABAergic	Lamp5	5	Lamp5 Plch2 Dock5	Core	0	0	0	0	0	43.79725624	0	0	0	0	0	0	0	0	0	0	0	55.17316696	0	0	0	0	4.550364285	0	0	0.568795536	143.9052705	0	0
F2S4_160819_005_D01	ALM	L1	GABAergic	Lamp5	5	Lamp5 Plch2 Dock5	Core	0	0	20.72557951	0	0	16.11989517	75.418081	0	0	0	0	0	0	0	6.332815961	0	0	0	0	0	0	0	109.9607135	0	0	0	278.0681918	0	0
F2S4_160819_007_A01	ALM	L1	GABAergic	Lamp5	5	Lamp5 Plch2 Dock5	Core	0	0	0	0	0	66.08373398	52.99784606	0	0	0	0	0	0	0	442.3030116	0	0	0	1.308588792	0	0	0	0	0	0	0	0	0	0
F2S4_160819_007_H01	ALM	L1	GABAergic	Lamp5	5	Lamp5 Plch2 Dock5	Core	0	0	152.4776513	0	0	49.35266976	0	0	0	0	0	0	0	0	13.99553322	0	0	0	0	0	0	0	209.1963912	0	0	0	139.2187251	0	0
F2S4_160819_009_A01	ALM	L1	GABAergic	Lamp5	5	Lamp5 Plch2 Dock5	Core	0	0	0	0	0	0	0	0	0	0.611206969	0	0	0	0	0	0	0	0	0	0	0	0	0	0	0	0	117.962945	0	0
F2S4_160819_011_A01	ALM	L1	GABAergic	Lamp5	5	Lamp5 Plch2 Dock5	Core	0	0	0	0.647148663	0	0	0	0	0	0	0	0	0	0	42.06466309	0	0	0	0	111.9567187	0	0	0.647148663	0.647148663	0	0	133.9597732	0	0
F2S4_160819_011_D01	ALM	L1	GABAergic	Lamp5	5	Lamp5 Plch2 Dock5	Core	0	0	0	0	0	76.15628018	38.70237189	0	0	0	0	0	0	0	86.14398905	0	0	0	56.18086243	0	0	0	115.4828839	0	0	0	0	0	0
F2S4_160819_011_E01	ALM	L1	GABAergic	Lamp5	5	Lamp5 Plch2 Dock5	Core	0	0	0.659636698	0	11.21382387	38.91856521	0	0	0	0	0	0	0	0	213.0626536	0	0	0	0	0	0	0	0.659636698	0	0	0	81.79495061	0	0
F2S4_160819_011_F01	ALM	L1	GABAergic	Lamp5	5	Lamp5 Plch2 Dock5	Core	0	0	0	0	0	0	0	0	0	0	0	0	0	0	308.5249739	0	0	0	134.8932061	0	0	0	0.691760031	0	0	0	0	0	0
F2S4_160819_013_G01	ALM	L1	GABAergic	Lamp5	5	Lamp5 Plch2 Dock5	Intermediate	0	0	68.34059093	0	0	14.59701942	6.635008828	0	0	0	0	0	0	0	20.56852737	0	0	0	4.64450618	0	0	0	124.0746651	0	0	0	49.76256621	0	0
F2S4_160819_014_A01	ALM	L1	GABAergic	Lamp5	5	Lamp5 Plch2 Dock5	Core	0	0	0	0	0	0	0	0	0	0	0	0	0	0	0	0	0	0	0	0	0	0	107.1364304	0	0	0	357.8148745	0	0
F2S4_160819_014_B01	ALM	L1	GABAergic	Lamp5	5	Lamp5 Plch2 Dock5	Core	0.527905619	0	0	0	0	0.527905619	0	0	0	0	0	0	0	0	11.086018	0	0	0	0	257.0900364	0	0	37.48129894	0	0	0	281.9016005	0	0
F2S4_160819_014_D01	ALM	L1	GABAergic	Lamp5	5	Lamp5 Plch2 Dock5	Core	0	0	0	0	0	0.574743032	99.4305446	0	0	0	0	0	0	0	209.7812068	0	0	0	20.69074917	100.5800307	0	0	3.448458194	0	0	0	36.78355407	0	0
F2S4_160819_015_H01	ALM	L1	GABAergic	Lamp5	5	Lamp5 Plch2 Dock5	Core	0	0	41.07581011	0	0	22.27001753	43.5502565	0	0	0	0	0	0	0	35.63202805	0	0	0	44.04514578	0	0	0	0.494889278	0	0	0	182.1192545	0	0
F2S4_160819_016_E01	ALM	L1	GABAergic	Lamp5	5	Lamp5 Plch2 Dock5	Core	0	0	0	0	3.454241377	67.93341374	0	0	0	0	0	0.575706896	0	0	77.14472408	0	0	0	2.302827584	0	0	0	77.72043097	0	0	0	166.9549999	0	0
F2S4_160819_016_H01	ALM	L1	GABAergic	Lamp5	5	Lamp5 Plch2 Dock5	Intermediate	0	0	0	0	0	6.985445824	46.9022791	0	0	0.498960416	0	0	0	0	0	0	0	0	0	0	0	0	47.90019993	0	0	0	103.2848061	0	0
F2S4_160819_017_H01	ALM	L1	GABAergic	Lamp5	5	Lamp5 Plch2 Dock5	Core	0	0	40.58508398	0	0	0	0	0	0	0	0	0	0	0	0	0	0	0	0	0	0	0	310.5641209	0	0	0	122.3434416	0	0
F2S4_161004_026_A01	ALM	L1-L2/3	GABAergic	Lamp5	5	Lamp5 Plch2 Dock5	Core	0	0	71.93252183	0	100.6144767	0	0	0	0	0	0	0	0	0	60.55079369	0	0	0	0	0	0	0	47.34798905	0	0	0	0	0	0
F2S4_161004_026_D01	ALM	L1-L2/3	GABAergic	Lamp5	5	Lamp5 Plch2 Dock5	Intermediate	0	0	0	0	0	23.556707	21.15296139	0	0	0	0	0	0	0	181.7231683	0	0	0	0	38.94067892	0	0	0	0	0	0	83.16959819	0	0
F2S4_161004_026_F01	ALM	L1-L2/3	GABAergic	Lamp5	5	Lamp5 Plch2 Dock5	Core	0	0	0	0	96.43872423	0	65.25207211	0	0	0	0	0	0	0	0	0	0	0	0	0	0	0	1.439383944	0	0	0	169.8473054	0	0
F2S4_161004_027_H01	ALM	L1-L2/3	GABAergic	Lamp5	5	Lamp5 Plch2 Dock5	Core	0	0	267.8149552	0	68.38846177	24.39029056	0	0	0	0	0	0	0	0	0	0	0	0	26.30325453	0	0	0	50.21530409	0	0	0	90.38754737	0	0
F2S4_161019_002_E01	ALM	L1	GABAergic	Lamp5	5	Lamp5 Plch2 Dock5	Core	0	0	84.35421751	0	0	38.49722678	46.42312642	0	0	0	0	0	0	0	0	0	0	0	2.264542752	0	0	0	217.9622399	0	0	0	347.6073124	0	0
F2S4_161019_002_F01	ALM	L1	GABAergic	Lamp5	5	Lamp5 Plch2 Dock5	Core	0	0	14.63670046	0	0	27.94279179	116.4282991	0	0	0	0	0	0	0	176.3057101	0	0	0	0	0	0	0	0	0	0	0	0	0	0
F2S4_161019_006_D01	ALM	L1	GABAergic	Lamp5	5	Lamp5 Plch2 Dock5	Core	0	0	43.38258641	0	0	2.76910126	0	0	0	0	0	0	0	0	0	0	0	0	0	0	0	0	145.8393331	0	0	0	164.3000081	0	0
F2S4_161019_006_G01	ALM	L1	GABAergic	Lamp5	5	Lamp5 Plch2 Dock5	Core	0	0	0	0	0	0	0	0	0	0	0	0	0	0	151.8079015	0	0	38.08800397	0	0	0	0	62.57314937	0	0	0	0	0	0
F2S4_161019_007_G01	ALM	L1	GABAergic	Lamp5	5	Lamp5 Plch2 Dock5	Core	0	0	0	0	0	56.18755918	0	0	0	0	0	0	0	0	84.91983376	0	0	0	7.661939888	58.10304415	0	0	47.8871243	0.638494991	0	0	0	0	0
F2S4_161019_008_A01	ALM	L1	GABAergic	Lamp5	5	Lamp5 Plch2 Dock5	Core	0	0	0	1.505832466	0	33.88123048	79.80912068	0	0	0	0	0	0	0	82.82078561	0	0	0	0	0	0	0	0	0	0	12.79957596	0	0	0
F2S4_161019_008_B01	ALM	L1	GABAergic	Lamp5	5	Lamp5 Plch2 Dock5	Core	0	0	117.8766486	0	0	90.86324999	13.0974054	0	0	0	0	0	0	0	0	0	0	0	0	0	0	0	40.11080405	0	0	0	149.8015743	0	0
F2S4_161019_008_C01	ALM	L1	GABAergic	Lamp5	5	Lamp5 Plch2 Dock5	Core	0	0	0	0	0	56.2913641	0	0	0	0	0	0	0	0	5.62913641	0	0	0	0	0	0	0	117.4077023	0	45.83725362	0	4.824974066	0	0
F2S4_161019_008_D01	ALM	L1	GABAergic	Lamp5	5	Lamp5 Plch2 Dock5	Core	0	0	70.22017145	0	0	0	0	0	0	0	0	0	0	0	5.46156889	0	0	0	0	0	0	0	56.17613716	0	0	0	197.3967042	0	0
F2S4_161019_008_F01	ALM	L1	GABAergic	Lamp5	5	Lamp5 Plch2 Dock5	Core	0	0	88.57395926	0	0	67.99617074	0	0	0	0	0	0	0	0	0	0	0	0	0	0	0	0	118.0986123	0	0	0	90.36333217	0	0
F2S4_161019_008_G01	ALM	L1	GABAergic	Lamp5	5	Lamp5 Plch2 Dock5	Core	0	0	0	0	58.98322003	0	131.5779524	0	0	0	0	0	0	0	0	0	0	0	71.83853722	0.756195129	0	1.512390257	271.4740512	0	0	0	513.4564923	0	0
F2S4_161019_008_H01	ALM	L1	GABAergic	Lamp5	5	Lamp5 Plch2 Dock5	Core	0	0	12.82421211	0	0	85.49474742	59.84632319	0	0	0	0	0	0	0	19.9487744	0	0	7.837018513	0	0	0	0	16.38649325	0	0	0	54.14667336	0	0
F2S4_161019_009_A01	ALM	L1	GABAergic	Lamp5	5	Lamp5 Plch2 Dock5	Core	0	0	0	0	3.740242642	0	0	0	0	0	0	0	0	0	6.85711151	0	0	0	0	0	0	0	95.37618737	0	0	0	213.8172044	0	0
F2S4_161019_011_H01	ALM	L1	GABAergic	Lamp5	5	Lamp5 Plch2 Dock5	Core	0	0	0	0	0	13.00975592	0.46463414	0	0	0	0	0	0	0	61.33170649	0	0	0	45.53414573	0	0	0	103.1487791	0	0	0	118.4817057	0	0
F2S4_161019_012_A01	ALM	L1	GABAergic	Lamp5	5	Lamp5 Plch2 Dock5	Core	0	0	49.71989286	0	0.368295503	32.04170873	0	0	0	0	0	0	0	0	16.94159312	0	0	0	0	0	0	0	0.736591005	0	0	0	122.6424024	0	0
F2S4_161019_012_D01	ALM	L1	GABAergic	Lamp5	5	Lamp5 Plch2 Dock5	Core	0	0	0	0.604689244	0	111.8675102	0	0	0	0	0	0	0	0	178.383327	0	0	0	0	0	0	0	22.97819128	0	0	0	0	0	0
F2S4_161019_012_F01	ALM	L1	GABAergic	Lamp5	5	Lamp5 Plch2 Dock5	Intermediate	0	0	199.9205089	0	45.80517627	0	107.8330191	0	0	0	0	0	0	0	0	0	0	0	0	0	0	0	170.8151365	0	0	0	219.005999	0	0
F2S4_161019_012_G01	ALM	L1	GABAergic	Lamp5	5	Lamp5 Plch2 Dock5	Core	0	0	0	0	0	48.64710475	0	0	0	0	0	0	0	0	0.481654502	0	0	0	0	76.58306589	0	0	35.16077868	0	0	0	0	0	0
F2S4_161019_013_D01	ALM	L1	GABAergic	Lamp5	5	Lamp5 Plch2 Dock5	Core	0	0	0	0	0	31.64750695	74.70886888	0	0	0	0	0	0	0	62.77620232	0	0	0	113.6197381	188.328607	0	0	67.44550662	0	49.80591258	0	114.1385497	0	0
F2S4_161019_013_G01	ALM	L1	GABAergic	Lamp5	5	Lamp5 Plch2 Dock5	Core	0	0	0	0	0	0.564734053	0	0	0	0	0	0	0	0	221.9404827	0	0	0	0	72.85069279	0	0	10.729947	0	0	0	0	0	0
F2S4_161019_013_H01	ALM	L1	GABAergic	Lamp5	5	Lamp5 Plch2 Dock5	Core	0	0	0	0	0	37.62666438	0	0	0	0	0	0	0	0	43.41538197	0	0	0	67.05264549	0	0	0	0	0	8.200683262	0	0	0	0
F2S4_161020_001_G01	ALM	L1	GABAergic	Lamp5	5	Lamp5 Plch2 Dock5	Core	0	0	89.79828799	0.52208307	73.09162976	0	60.56163608	0	0	0	0	0	0	0	0	0	0	0	0	0	0	0	141.4845119	0	0	0	264.6961163	0	0
F2S4_161020_002_C01	ALM	L1	GABAergic	Lamp5	5	Lamp5 Plch2 Dock5	Core	0	0	173.0888209	0	0	1.197846512	0	0	0	0	0	0	0	0	0	0	0	0	59.89232558	0	0	0	48.51278372	0	0	0	241.3660721	0	0
F2S4_161020_002_E01	ALM	L1	GABAergic	Lamp5	5	Lamp5 Plch2 Dock5	Core	0	0	30.47673228	0	0	7.619183071	33.01645998	0	0	0	0	0	0	0	0	0	0	0	7.619183071	0	0	0	228.5754921	0	0	0	429.2139797	0	0
F2S4_161020_005_B01	ALM	L1	GABAergic	Lamp5	5	Lamp5 Plch2 Dock5	Core	0	0	33.63365871	0	0	5.219016007	0	0	0	0	0	0	0	0	299.2235844	0	0	0	0	0.579890667	0	0	0	0	0	0	0.579890667	0	0
F2S4_161020_005_D01	ALM	L1	GABAergic	Lamp5	5	Lamp5 Plch2 Dock5	Core	0	0	0	0	0	9.127232925	0	0	0	0	0	0	0	0	0	0	0	0	2.106284521	91.27232925	0	0	75.12414792	0	0	2.106284521	195.1823656	0	0
F2S4_161020_006_C01	ALM	L1	GABAergic	Lamp5	5	Lamp5 Plch2 Dock5	Core	0	0	0	0	0	12.54885338	7.668743734	0	0	0	0	0	0	0	0	0	0	0	0	86.44765664	0	0	50.19541353	0	0	0	0	0	0
F2S4_161020_006_H01	ALM	L1	GABAergic	Lamp5	5	Lamp5 Plch2 Dock5	Core	0	0	0	0	0	78.29265913	0	0	0	0	0	0	0	0	91.14667779	0	0	0	106.9220643	38.56205599	0	0	5.25846218	0	4.089915029	0	397.890305	0	0
F2S4_161020_007_A01	ALM	L1	GABAergic	Lamp5	5	Lamp5 Plch2 Dock5	Core	0	0	0	0	19.99883411	26.38144074	45.52926063	0	0	0	0	0	0	0	25.95593363	0	0	31.48752605	66.37910896	0	0	0	18.72231278	0	30.63651183	0	261.2613648	0	0
F2S4_161020_007_B01	ALM	L1	GABAergic	Lamp5	5	Lamp5 Plch2 Dock5	Core	0	0	0.576285838	0	0	44.37400951	42.645152	0	0	0	0	0	0	0	123.3251693	0	0	0	4.610286702	0	0	0	97.39230658	0	32.84829275	0	683.4750036	0	0
F2S4_161020_007_C01	ALM	L1	GABAergic	Lamp5	5	Lamp5 Plch2 Dock5	Core	0	0	28.40288885	0	25.61829191	93.5624574	0	0	0	0	0	0	0	0	49.56582564	0	0	0	0	0	0	0	16.15066229	0	0	0	86.87942472	0	0
F2S4_161020_007_F01	ALM	L1	GABAergic	Lamp5	5	Lamp5 Plch2 Dock5	Core	0	0	0	0	127.1639801	0	144.1557189	0	0	0	0	0	0	0	0	0	0	0	0	0	0	0	145.2519601	0	0	42.20528651	452.747619	0	0
F2S4_161020_008_G01	ALM	L1	GABAergic	Lamp5	5	Lamp5 Plch2 Dock5	Core	0	0	0	0	0	0	0	0	0	0	0	0	0	0	0	0	0	0	0	0	0	0	117.5513713	0	0	0	269.8083857	0	0
F2S4_170209_001_G01	ALM	L1-L6	GABAergic	Lamp5	5	Lamp5 Plch2 Dock5	Core	0	0	0	0	72.36962439	0	0	0	0	0	0	0	0	0	0.495682359	0	0	0	0	48.0811888	0	0	20.32297671	0	11.40069425	0	256.7634619	0	0
F2S4_171121_001_F01	ALM	L2/3	GABAergic	Lamp5	5	Lamp5 Plch2 Dock5	Intermediate	0	0	17.91976203	0	0	0	0	0	0	0	0	0	0	0	117.5984383	0	0	0	4.479940506	0	0	0	67.1991076	0	0	0	0	0	0
F1S4_160108_001_E01	VISp	L2/3	GABAergic	Lamp5	5	Lamp5 Plch2 Dock5	Core	0	0	0	0	0	1.707006065	59.74521227	0	48.36517184	0	0	0	0	0	66.00423451	0	0	0	0	0	0	0	77.38427495	0	0	0	0	0	0
F1S4_160108_002_B01	VISp	L2/3	GABAergic	Lamp5	5	Lamp5 Plch2 Dock5	Core	0	0	0	0	79.21878455	86.90418902	147.7962398	0	0	0	0	0	0	0	0	0	0	0	5.320664634	0	0	0	0	0	0	0	173.808378	0	0
F1S4_160108_003_A01	VISp	L2/3	GABAergic	Lamp5	5	Lamp5 Plch2 Dock5	Core	0	0	127.7511597	0	0	0	24.84050327	0	0	0	0	0	0	0	0	0	0	26.61482493	0	0	0	0	44.35804155	0	0	0	116.5137891	0	0
F1S4_160108_003_D01	VISp	L2/3	GABAergic	Lamp5	5	Lamp5 Plch2 Dock5	Core	0	0	0	0	64.18900696	7.012244458	180.7001456	0	25.35196073	0	0	0	0	0	0	0	0	0	0	0	0	0	70.661848	0	1.07880684	0	333.8907169	0	0
F1S4_160108_005_A01	VISp	L1	GABAergic	Lamp5	5	Lamp5 Plch2 Dock5	Core	0	0	0	0	0	1.011092187	189.579785	0	0	0	0	0	0	0	60.66553121	0	0	0	71.78754527	0	0	0	0	0	0	0	0	0	0
F1S4_160108_005_B01	VISp	L1	GABAergic	Lamp5	5	Lamp5 Plch2 Dock5	Core	0	0	83.83250266	0	80.83848471	51.39730818	38.92223338	0	0	0	0	0	0	0	0	0	0	0	0	0	0	0	0	0	0	0	20.45912267	0	0
F1S4_160108_005_E01	VISp	L1	GABAergic	Lamp5	5	Lamp5 Plch2 Dock5	Core	0	0	0	0	0	37.04159457	163.2341456	0	0	0	0	0	1.255647274	0	0	0	0	0	0	0	0	0	0	0	0	0	557.5073895	0	0
F1S4_160108_005_F01	VISp	L1	GABAergic	Lamp5	5	Lamp5 Plch2 Dock5	Core	0	0	0	0	3.359991506	129.6956721	0	0	0	0	0	0	0	0	22.84794224	0	0	0	0	0	0	0	288.9592695	0	0	0	349.4391166	0	0
F1S4_160108_006_F01	VISp	L1	GABAergic	Lamp5	5	Lamp5 Plch2 Dock5	Core	0	0	0	0	0	2.856318605	0	0	0	0	0	0	0	0	371.8926824	0	0	0	0	0	0	0	65.1240642	0	9.711483258	0	69.12291025	0	0
F1S4_170426_011_H01	VISp	L2/3	GABAergic	Lamp5	5	Lamp5 Plch2 Dock5	Core	0	0	0	0	0	0	105.8079941	0	0	0	0	0	0	0	89.02114888	0	0	0	0	0	0	0	6.104307352	0	0	0	0	0	0
F1S4_180124_301_F01	VISp	L1-L4	GABAergic	Lamp5	5	Lamp5 Plch2 Dock5	Core	0	0	0	0	0	10.65179289	0	0	0	0	0	0	0	0	153.9668245	0	0	0	0	22.27193059	0	0	10.65179289	0	0	0	171.3970311	0	0
F1S4_180124_303_B01	VISp	L1-L4	GABAergic	Lamp5	5	Lamp5 Plch2 Dock5	Core	0	0	127.291712	0	98.697197	2.767211131	0	0	0	0	0	0	0	0	0	0	0	0	29.51691873	0	0	0	24.90490018	0	25.82730389	0	390.1767694	0	13.83605565
F1S4_180130_310_C01	VISp	L1-L4	GABAergic	Lamp5	5	Lamp5 Plch2 Dock5	Core	0	0	0	0	0	12.41692731	0	0	0	0	0	0	0	0	0	0	0	0	0	0	0	0	0	0	12.41692731	0	110.3726872	0	0
F1S4_180130_310_D01	VISp	L1-L4	GABAergic	Lamp5	5	Lamp5 Plch2 Dock5	Core	0	0	0	0	0	0	0	0	0	0	0	0	0	0	149.6197296	0	0	0	0	0	0	0	1.574944523	0	0	0	0	0	0
F1S4_180130_310_E01	VISp	L1-L4	GABAergic	Lamp5	5	Lamp5 Plch2 Dock5	Core	0	0	36.60456093	0	0	15.41244671	0	0	0	0	0	0	0	0	0	0	0	0	11.55933503	42.38422844	0	0	0	0	0	0	71.28256602	0	0
F1S4_180130_311_E01	VISp	L1-L4	GABAergic	Lamp5	5	Lamp5 Plch2 Dock5	Core	0	0	0	0	0	0	81.28863202	0	0	0	0	0	0	0	33.47178966	0	0	0	0	0	0	0	97.22757948	0	0	0	159.3894746	0	0
F1S4_180130_330_D01	VISp	L1-L4	GABAergic	Lamp5	5	Lamp5 Plch2 Dock5	Core	0	0	0	0	0	0	193.2244952	0	0	0	0	47.42783065	0	0	0	0	0	0	0	0	0	0	0	0	0	0	122.9610424	0	0
F1S4_180130_330_H01	VISp	L1-L4	GABAergic	Lamp5	5	Lamp5 Plch2 Dock5	Core	0	0	0	0	0	0	0	0	0	0	0	0	0	0	0	0	0	0	0	0	0	0	72.91975678	0	0	0	0	0	0
F1S4_180130_331_H01	VISp	L1-L4	GABAergic	Lamp5	5	Lamp5 Plch2 Dock5	Intermediate	0	0	47.85129943	0	0	0	0	0	0	0	0	0	0	0	0	0	0	0	0	0	0	0	12.40589244	0	0	0	0	0	0
F1S4_180130_332_A01	VISp	L1-L4	GABAergic	Lamp5	5	Lamp5 Plch2 Dock5	Core	0	0	0	0	0	0	60.93015254	0	0	0	0	0	0	0	0	0	0	0	0	0	0	0	19.71269641	0	0	0	188.1666476	0	0
F1S4_180130_332_D01	VISp	L1-L4	GABAergic	Lamp5	5	Lamp5 Plch2 Dock5	Core	0	0	0	0	0	0	0	0	0	0	0	0	0	0	0	0	0	0	0	0	0	0	4.937930217	0	0	0	0	0	0
F1S4_180130_332_G01	VISp	L1-L4	GABAergic	Lamp5	5	Lamp5 Plch2 Dock5	Core	0	0	62.52316026	0	0	0	60.99820513	0	0	0	0	0	0	0	1.524955128	0	0	0	0	0	0	0	280.5917436	71.67289103	0	0	376.6639167	0	0
F2S4_151223_003_D01	VISp	L2/3	GABAergic	Lamp5	5	Lamp5 Plch2 Dock5	Core	0	0	0	0	0	0	0	0	0	0	0	0	0	0	35.68517203	0	0	0	104.8251928	0	0	0	301.093639	0	0	0	39.03065691	0	0
F2S4_151223_003_E01	VISp	L2/3	GABAergic	Lamp5	5	Lamp5 Plch2 Dock5	Core	0	0	0	0	0	0	137.7628996	0	0	0	0	0	0.497338988	0	0	0	0	0	0	0	0	0	1.989355951	0.497338988	0	0	0	0	0
F2S4_151223_014_F01	VISp	L1	GABAergic	Lamp5	5	Lamp5 Plch2 Dock5	Core	0	0	0	0	0	12.94395612	82.84131918	0	0	0	0	0	0	0	128.5766308	0	0	0	0	0	0	0	3.451721632	0	0	0	49.18703326	0	0
F2S4_151223_015_C01	VISp	L1	GABAergic	Lamp5	5	Lamp5 Plch2 Dock5	Core	0	0	0	0	0	0	92.8245836	0	0	0	0	0	0	0	65.43372287	0	0	0	184.88831	0	0	0	2.282571728	0	0	0	0	0	0
F2S4_151223_016_B01	VISp	L1	GABAergic	Lamp5	5	Lamp5 Plch2 Dock5	Core	0	0	0	0	0	9.966272473	110.4595199	0	0	0	0	0	0	0	109.6289972	0	0	0	0	0	0	0	56.47554401	0	0	0	0	0	0
F2S4_151223_017_F01	VISp	L1	GABAergic	Lamp5	5	Lamp5 Plch2 Dock5	Core	0	0	0	0	0	21.55372157	0	0	0	0	0	0	0	0	0	0	0	0	10.77686079	0	0	0	144.4099345	0	0	0	5.0292017	0	0
F2S4_151223_017_G01	VISp	L1	GABAergic	Lamp5	5	Lamp5 Plch2 Dock5	Core	0	0	0	0	0	5.046783685	58.87914299	0	0	0	0	0	0	0	37.85087764	0	0	0	0	0	0	0	190.0955188	0	42.05653071	0	92.52436755	0	0
F2S4_151223_018_G01	VISp	L1	GABAergic	Lamp5	5	Lamp5 Plch2 Dock5	Core	0	0	0	0	0	0	0	0	0	0	0	0	0	0	212.4987765	0	0	0	0	0	0	0	176.5245741	0	0	0	0	0	0
F2S4_160114_010_G01	VISp	L1	GABAergic	Lamp5	5	Lamp5 Plch2 Dock5	Core	0	0	0	0	0	96.44052519	0	0	0	0	0	0	0	0	59.88137185	0	0	10.08528368	0	0	0	0	39.08047426	0	0	0	2.52132092	0	0
F2S4_160114_011_B01	VISp	L1	GABAergic	Lamp5	5	Lamp5 Plch2 Dock5	Core	0	0	139.1097817	0	0	10.2375164	0	0	0.602206847	0	0	0	0	0	28.90592867	0	0	0	0	0	0	0	15.05517118	0	0	0	219.2032924	0	0
F2S4_160114_011_C01	VISp	L1	GABAergic	Lamp5	5	Lamp5 Plch2 Dock5	Core	0	0	0	0	0	12.0605696	73.07286287	0	0	0	0	0	0	0	19.86446758	0	0	0	0	1.418890541	0	0	2.128335812	0	23.41169393	0	50.37061421	0	0
F2S4_160114_012_E01	VISp	L1	GABAergic	Lamp5	5	Lamp5 Plch2 Dock5	Core	0	0	0	0	0	6.106705075	1045.555147	0	0	114.7188168	0	0	0	0	10.46863727	0	0	0	0	0	0	0	0.43619322	0	53.65176602	0	62.37563041	0	0
F2S4_160114_013_D01	VISp	L1	GABAergic	Lamp5	5	Lamp5 Plch2 Dock5	Core	0	0	0	0	0	18.6287998	28.49110557	0	0	0	0	0	0	0	31.77854083	0	0	0	86.02122259	0	0	0	160.5364218	0	5.479058763	0	102.4583989	0	0
F2S4_160114_021_D01	VISp	L2/3	GABAergic	Lamp5	5	Lamp5 Plch2 Dock5	Core	0	0	65.59899168	0	0	54.38548883	63.91696625	0	0	0	0	0	0	0	99.23950024	0	0	16.82025428	0	0	0	0	127.8339325	0.560675143	0	0	694.6765017	0	0
F2S4_160115_024_A01	VISp	L1	GABAergic	Lamp5	5	Lamp5 Plch2 Dock5	Core	0	0	71.86945126	0	54.95899214	0	0	0	0	0	0	0	0	0	0	0	0	0	0	0	0	0	118.3732138	0	0	0	460.810011	0	0
F2S4_160115_024_F01	VISp	L1	GABAergic	Lamp5	5	Lamp5 Plch2 Dock5	Core	0	0	0	0	0	40.90805436	71.3714991	0	0	0	0	0	0	0	0	0	0	0	0	0	0	0	136.6503092	0	0	0	6.963073083	0	0
F2S4_160115_026_B01	VISp	L1	GABAergic	Lamp5	5	Lamp5 Plch2 Dock5	Intermediate	0	0	17.45118032	154.5675971	0	1.662017174	0	0	0	0	0	0	0	0	0	0	0	0	2.49302576	0	0	0	1.662017174	0	0	46.53648086	774.5000029	0	0
F2S4_160115_027_A01	VISp	L1	GABAergic	Lamp5	5	Lamp5 Plch2 Dock5	Core	0	0	0	0	0	49.89318323	0	0	0	0	0	0	0	0	90.7148786	0	0	0	0	0	0	0	45.3574393	0	0	0	716.6475409	0	0
F2S4_160115_028_F01	VISp	L1	GABAergic	Lamp5	5	Lamp5 Plch2 Dock5	Core	0	0	0	0.579483391	0	20.28191867	43.46125429	0	0	0	0	0	0	0	0	0	0	0	107.7839106	0	0	0	97.932693	0	0	0	344.7926174	0	0
F2S4_160115_029_C01	VISp	L1	GABAergic	Lamp5	5	Lamp5 Plch2 Dock5	Core	0	0	0	0	0	23.78171989	0	0	0	0	0	0	0	0	291.9411132	0	0	0	0	0	0	0	182.8732254	0	0	0	113.1681843	0	0
F2S4_160119_004_H01	VISp	L2/3	GABAergic	Lamp5	5	Lamp5 Plch2 Dock5	Core	0	0	55.06628372	0	4.331056023	7.424667468	15.46805722	0	11.75572349	0	0	0	0	0	24.13016927	0	0	0	27.842503	0	0	0	127.4567915	0	0	0	373.7082625	0	0
F2S4_160119_006_D01	VISp	L1	GABAergic	Lamp5	5	Lamp5 Plch2 Dock5	Core	0	0	0	0	0	67.38962646	79.02524541	0	0	0	0	0	0	0	176.4735542	0	0	0	0	23.75605537	0	0	36.8461267	0	0	0	0	0	0
F2S4_160119_006_G01	VISp	L1	GABAergic	Lamp5	5	Lamp5 Plch2 Dock5	Intermediate	0	0	96.74474456	0	90.88142671	2.931658926	0	0	0	0	0	0	0	0	0	0	0	0	0	0	0	0	198.7664752	0	0	0	599.8174163	0	0
F2S4_160119_007_D01	VISp	L1	GABAergic	Lamp5	5	Lamp5 Plch2 Dock5	Core	0	0	0	0	0	37.77739771	72.12048655	0	9.616064873	0.686861777	0	0	0	0	22.66643863	0	0	0	0	37.09053594	0	0	0	0	0	0	133.2511847	0	0
F2S4_160119_007_E01	VISp	L1	GABAergic	Lamp5	5	Lamp5 Plch2 Dock5	Core	0	0	0	0	0	106.6203329	98.72253046	0	0	0	0	0	0	0	65.1568701	0	0	0	80.95247497	0	0	0	5.923351827	0	0	0	0	0	0
F2S4_160119_007_H01	VISp	L1	GABAergic	Lamp5	5	Lamp5 Plch2 Dock5	Core	0	0	0	0	0	0	148.8439471	0	0	0	0	0	0	0	0	0	0	0	0	0	0	0	109.0258211	0	0	0	180.1296175	0	0
F2S4_160121_004_A01	VISp	L2/3	GABAergic	Lamp5	5	Lamp5 Plch2 Dock5	Core	0	0	103.9693251	1.316067406	0	0	0	0	0	0	0	0	0	0	0	0	0	0	0	0	0	0	62.5132018	0	0	0	111.2076958	0	0
F2S4_160121_006_G01	VISp	L2/3	GABAergic	Lamp5	5	Lamp5 Plch2 Dock5	Intermediate	0	0	0	0	0	0	72.37027434	0	19.45437482	0	0	0	0	0	0	0	0	28.79247474	0	0	0	0	104.275449	0	0	0	51.35954953	0	0
F2S4_160121_007_A01	VISp	L1	GABAergic	Lamp5	5	Lamp5 Plch2 Dock5	Core	0	0	102.590163	0	5.964544362	42.34826497	0.596454436	0	0	0	0	0	0	0	0	0	0	30.41917625	0	0	0	0	51.89153595	0	0	0	403.7996533	0	0
F2S4_160121_007_D01	VISp	L1	GABAergic	Lamp5	5	Lamp5 Plch2 Dock5	Core	0	0	0	0	0.880267355	56.33711071	168.5711984	0	35.21069419	0	0	0	0	0	34.77056051	0	0	0	0	0	0	0	0	0	2.200668387	0	115.7551572	0	0
F2S4_160121_007_E01	VISp	L1	GABAergic	Lamp5	5	Lamp5 Plch2 Dock5	Core	0	0	25.21579903	0	0	0	88.25529662	0	0	0	0	0	0	0	0	0	0	0	0	0	0	0	199.5014688	0.741641148	2.224923444	0	166.1276172	0	0
F2S4_160121_008_F01	VISp	L4	GABAergic	Lamp5	5	Lamp5 Plch2 Dock5	Core	0	0	0	0	0	13.05841924	70.10309278	0	0	0	0	0	0	0	134.0206186	0	0	0	82.4742268	96.90721649	0	0	0	0	0	0	7.560137457	0	0
F2S4_160128_005_E01	VISp	L2/3	GABAergic	Lamp5	5	Lamp5 Plch2 Dock5	Core	0	0	58.0082755	0	0	0	8.804827532	0	0	0	0	0	0	0	0	0	0	0	10.87655166	0	0	0	90.63793047	0	0	27.45034466	580.6006861	0	0
F2S4_160129_027_B01	VISp	L2/3	GABAergic	Lamp5	5	Lamp5 Plch2 Dock5	Core	0	0	0	0	0	108.2596919	0.746618565	0	0	0	0	0	0	0	0	0	0	0	17.91884555	0	0	0	65.70243368	0	0	0	545.7781707	0	0
F2S4_160129_029_D01	VISp	L2/3	GABAergic	Lamp5	5	Lamp5 Plch2 Dock5	Core	0	0	329.9529198	0	0	4.811813414	156.7276369	0	0	0	0	0	0	0	0	0	0	0	0	0	0	0	117.5457277	0	0	0	530.6742794	0	0
F2S4_160303_016_B01	VISp	L1	GABAergic	Lamp5	5	Lamp5 Plch2 Dock5	Core	0	0	65.65899648	0	0	4.10368728	0	0	0	0	0	0	0	0	0	0	0	0	0	0	0	0	297.8104483	0	0	0	0	0	0
F2S4_160303_018_C01	VISp	L1	GABAergic	Lamp5	5	Lamp5 Plch2 Dock5	Core	0	0	1.518507186	53.14775151	0	66.05506259	53.9070051	0	0	0	0	0	0	0	0	0	0	0	0	0	0	0	282.4423366	0	0	0	310.5347195	0	0
F2S4_160303_019_F01	VISp	L1	GABAergic	Lamp5	5	Lamp5 Plch2 Dock5	Core	0	0	0.567659636	0	0	15.32681017	0	0	0	0	0	0	0	0	23.8417047	0	0	0	0	0	0	0	14.1914909	0	41.43915342	0	157.2417191	0	0
F2S4_160304_001_A01	VISp	L1	GABAergic	Lamp5	5	Lamp5 Plch2 Dock5	Core	0	0	0	0.543944457	0	58.74600133	103.8933912	0	0	0	0	0	0	0	29.37300066	0	0	0	130.0027252	0	0	0	24.47750055	0	14.68650033	0	50.04289002	0	0
F2S4_160304_001_F01	VISp	L1	GABAergic	Lamp5	5	Lamp5 Plch2 Dock5	Core	0	0	0	0	0	0	92.02182167	0	21.58536558	0	0	0	0	0	0	0	0	0	43.17073115	0	0	0	74.98074358	0	0	0	0	0	0
F2S4_160304_002_F01	VISp	L1	GABAergic	Lamp5	5	Lamp5 Plch2 Dock5	Core	0	0	22.22329223	0	0	81.48540485	252.7899491	0	0	0	0	0	0	0	195.3797775	0	0	0	7.407764078	0	0	0	37.03882039	0	0	0	340.7571476	0	0
F2S4_160304_002_G01	VISp	L1	GABAergic	Lamp5	5	Lamp5 Plch2 Dock5	Intermediate	8.223678575	0	0	0	0	108.2784346	2.055919644	0	0	0	0	0	0	0	0	0	0	0	0	89.08985123	0	0	33.58002085	0	0	0	0	0	0
F2S4_160304_003_E01	VISp	L1	GABAergic	Lamp5	5	Lamp5 Plch2 Dock5	Core	0	0	0	0	0	0.816868665	0	0	0	0	0	0	0	0	0	0	0	0	0	0	0	0	102.1085831	0	0	0	0	0	0
F2S4_160304_003_H01	VISp	L1	GABAergic	Lamp5	5	Lamp5 Plch2 Dock5	Core	0	0	0	0	0	56.21538477	0	0	0	0	0	0	0	0	34.21806029	0	0	0	198.790636	70.06555203	0	0	225.6762548	0	0	0	552.377259	0	0
F2S4_160304_004_B01	VISp	L1	GABAergic	Lamp5	5	Lamp5 Plch2 Dock5	Intermediate	0	0	118.2835445	0	0	0.672065594	0	0	0	0	0	0	0	0	0	0	0	0	42.3401324	0	0	0	86.69646157	0	0	0	180.7856447	0	0
F2S4_160304_004_D01	VISp	L1	GABAergic	Lamp5	5	Lamp5 Plch2 Dock5	Core	0	0	0	0	0	248.2118742	44.39053669	0	0	0	0	0.625218827	0	0	8.127844746	0	0	0	34.38703546	0	0	0	57.52013205	0	20.63222128	0	26.25919072	0	0
F2S4_160304_004_E01	VISp	L1	GABAergic	Lamp5	5	Lamp5 Plch2 Dock5	Intermediate	0	0	182.8639824	0.755636291	0	5.289454038	36.27054197	0	0	0	0	0	0	0	0	0	0	0	0	0	0	0	8.311999202	0	0	0	149.6159856	0	0
F2S4_160304_014_D01	VISp	L4	GABAergic	Lamp5	5	Lamp5 Plch2 Dock5	Core	0	0	102.6504947	0	34.38054847	17.19027423	66.30534347	0	0	0	0	0	0	0	7.367260386	0	0	9.331863156	0	0	0	0	52.06197339	0	0	0	134.084139	0	0
F2S4_160304_018_C01	VISp	L2/3	GABAergic	Lamp5	5	Lamp5 Plch2 Dock5	Core	0	0	0	0	0	0.646626421	0	0	0	0	0	0	0	0	0	0	0	0	0.646626421	0	0	0	58.19637786	0	0	0	111.8663708	0	0
F2S4_160304_019_H01	VISp	L2/3	GABAergic	Lamp5	5	Lamp5 Plch2 Dock5	Core	0	0	0	0	0	12.14835144	40.14237868	0	0	0	0	0	0	0	19.54300015	0	0	0	48.59340577	0	0	0	76.58743301	0	0	0	291.0322454	0	0
F2S4_160304_020_E01	VISp	L2/3	GABAergic	Lamp5	5	Lamp5 Plch2 Dock5	Core	0	0	3.097720697	0	0	119.2622468	134.7508503	0	0	0	0	0	0	0	272.5994213	0	0	0	0	0	0	0	23.23290523	0	0	0	721.7689224	0	0
F2S4_160304_020_F01	VISp	L2/3	GABAergic	Lamp5	5	Lamp5 Plch2 Dock5	Core	0	0	48.98067449	0	0	0	0	0	0	0	0	0	0	0	0	0	0	0	0	0	0	0	12.81033025	0	0	39.18453959	853.0172849	0	0
F2S4_160321_002_H01	VISp	L2/3	GABAergic	Lamp5	5	Lamp5 Plch2 Dock5	Core	0	0	0	0	0	40.34180511	36.06312881	0	0	0	0	0	0	0	53.78907348	0	0	0	3.667436828	0	0	0	157.0885441	0	0	0	272.0015648	0	0
F2S4_160321_003_H01	VISp	L2/3	GABAergic	Lamp5	5	Lamp5 Plch2 Dock5	Core	0	0	0	0	0	0	69.03837906	0	0	0	0	0	0	0	197.1777947	0	0	0	0	46.54860406	0	0	0.523018023	0	0	0	23.53581104	0	0
F2S4_160330_001_A01	VISp	L2/3	GABAergic	Lamp5	5	Lamp5 Plch2 Dock5	Core	0	0	0	0	0	51.68520188	257.8386776	0	0	0	0	0	0	0	0	0	0	0	49.92320636	0	0	0	84.5757849	0	0	0	73.41647994	0	0
F2S4_160330_002_D01	VISp	L2/3	GABAergic	Lamp5	5	Lamp5 Plch2 Dock5	Core	0	0	0	0	0	29.04537198	0	0	0	0	0	0	0	0	0.518667357	0	0	0	0	0	0	0	132.7788434	0	0	0	120.8494941	0	0
F2S4_160330_019_C01	VISp	L2/3	GABAergic	Lamp5	5	Lamp5 Plch2 Dock5	Core	0	0	0	16.32208923	0	9.32690813	92.49183896	0	35.75314783	0	0	0	0	0	0	0	0	0	3.108969377	0	0	0	112.7001399	0	79.2787191	0	209.0781906	0	0
F2S4_160404_001_B01	VISp	L1	GABAergic	Lamp5	5	Lamp5 Plch2 Dock5	Intermediate	0	0	0	0	0	1.056884147	44.38913417	0	0	0	0	0	0	0	16.91014635	0	0	0	98.81866774	0	0	0	34.34873478	0	0	0	0	0	0
F2S4_160404_001_E01	VISp	L1	GABAergic	Lamp5	5	Lamp5 Plch2 Dock5	Core	0	0	0	0.53614732	0	0.53614732	117.4162632	0	0	0	0	0	0	0	28.41580798	0	0	0	0	0	0	0	0	0	9.650651767	0	84.71127663	0	0
F2S4_160404_001_F01	VISp	L1	GABAergic	Lamp5	5	Lamp5 Plch2 Dock5	Core	0	0	0.503794835	0	0	14.6100502	108.3158894	0	0	0	0	0	0	0	0	0	0	0	0	0	0	0	48.86809896	0	0	0	0	0	0
F2S4_160404_002_E01	VISp	L1	GABAergic	Lamp5	5	Lamp5 Plch2 Dock5	Core	0	0	43.42159849	100.3390992	0	25.23146939	100.3390992	0	0	0	0	0	0	0	0	0	0	0	0	0	0	0	0	0	0	0	329.1826588	0	0
F2S4_160404_002_H01	VISp	L1	GABAergic	Lamp5	5	Lamp5 Plch2 Dock5	Core	0	0	13.00811316	70.89421672	55.28448093	0	40.3251508	0	0	0	0	0	0	0	0	0	0	0	0	0	0	0	0	0	0	0	230.2436029	0	0
F2S4_160404_003_B01	VISp	L1	GABAergic	Lamp5	5	Lamp5 Plch2 Dock5	Core	0	0	0	0	0	0	169.4089242	0	21.35406608	0	0	0	0	0	42.23359735	0	0	0	0	0	0	0	0.949069603	0	0	0	0	0	0
F2S4_160404_003_D01	VISp	L1	GABAergic	Lamp5	5	Lamp5 Plch2 Dock5	Core	0	0	86.7797117	56.96309281	0	0	78.32425262	0	0	0	0	0	0	0	0	0	0	0	5.340289951	0	0	0	47.17256123	0	0	0	93.01004998	0	0
F2S4_160404_003_E01	VISp	L1	GABAergic	Lamp5	5	Lamp5 Plch2 Dock5	Core	0	0	0	0	0	0	0	0	0	0	0	0	0	0	10.48388365	0	0	0	0	0	0	0	107.2215373	0	0	0	114.3696398	0	0
F2S4_160404_003_H01	VISp	L1	GABAergic	Lamp5	5	Lamp5 Plch2 Dock5	Core	0	0	0	0	0	12.49136414	100.4113502	0	0	0	0	0	0	0	0	0	0	0	0	0	0	0	0	0	0	0	83.59605234	0	0
F2S4_160404_004_A01	VISp	L1	GABAergic	Lamp5	5	Lamp5 Plch2 Dock5	Core	0	0	0	0	0	0	0	0	52.35988376	0	0	0	0	0	22.37195033	0	0	0	106.6237633	0	0	0	99.48377915	0	0	0	69.97184466	0	0
F2S4_160404_004_B01	VISp	L1	GABAergic	Lamp5	5	Lamp5 Plch2 Dock5	Core	0	0	0	0	0	74.90794889	17.93009415	0	0	0	0	0	0	0	0	0	0	0	0	0	0	0	60.96232011	0	0	0	47.41513786	0	0
F2S4_160404_005_A01	VISp	L1	GABAergic	Lamp5	5	Lamp5 Plch2 Dock5	Core	0	0	8.898128562	112.0355278	0	24.26762335	32.76129152	0	0	0	0	0	0	0	0	0	0	0	0.404460389	0	0	8.493668173	39.23265775	0	0	0	53.38877137	0	0
F2S4_160404_005_C01	VISp	L1	GABAergic	Lamp5	5	Lamp5 Plch2 Dock5	Core	0	0	0	0	0	3.980455961	157.7255675	0	0	0	0	0	0	0	3.980455961	0	0	0	0	0	0	0	2.985341971	0	0	0.497556995	0	0	0
F2S4_160404_005_G01	VISp	L1	GABAergic	Lamp5	5	Lamp5 Plch2 Dock5	Intermediate	0	0	0	0	0	20.47444405	294.7466842	0	0	0	0	0	0	0	0	0	0	0	0	0	0	0	109.197035	0	26.01960599	0	92.13499825	0	0
F2S4_160404_006_D01	VISp	L1	GABAergic	Lamp5	5	Lamp5 Plch2 Dock5	Core	0	0	0	0	90.99681234	0	253.5901014	0	0	0	0	0	0	0	0	0	0	0	0	0	0	0	121.0211413	0	48.50083906	0	193.5414435	0	0
F2S4_160404_006_G01	VISp	L1	GABAergic	Lamp5	5	Lamp5 Plch2 Dock5	Core	0	0	0.46662859	0	0	8.865943206	242.6468667	0	0	0	0	0	0	0	0	0	0	0	0	0	0	0	0	0	0	0	0.46662859	0	0
F2S4_160404_018_F01	VISp	L2/3	GABAergic	Lamp5	5	Lamp5 Plch2 Dock5	Core	0	0	0	0	0	21.99252254	26.18157446	0	0	0	0	0	0	0	89.54098464	0	0	0	0	0	0	0	31.41788935	0	0	0	0	0	0
F2S4_160404_020_D01	VISp	L2/3	GABAergic	Lamp5	5	Lamp5 Plch2 Dock5	Core	0	0	0	0.495177467	0	0	312.9521589	0	0	0	0	0	0	0	0	0	0	0	0	0	0	0	139.6400456	0	0	0	110.9197525	0	0
F2S4_160404_030_F01	VISp	L1	GABAergic	Lamp5	5	Lamp5 Plch2 Dock5	Core	0	0	0	0	0	0	0	0	0	0	0	0	0	0	6.367071206	0	0	0	0	0	0	0	77.99662227	0	4.775303404	0	62.07894425	0	0
F2S4_160404_031_E01	VISp	L1	GABAergic	Lamp5	5	Lamp5 Plch2 Dock5	Core	0	0	0	0	0	1.219044647	196.2661882	0	0	0	0	0	0	0	111.5425852	0	0	0	0	0	0	0	23.77137061	0	23.16184829	0	80.4569467	0	0
F2S4_160404_032_D01	VISp	L1	GABAergic	Lamp5	5	Lamp5 Plch2 Dock5	Intermediate	0	0	127.9840689	0	0	28.17997848	49.90204522	0	0	0	0	0	0	0	0	0	0	0	15.26415501	0	0	0	4.109580195	0	0	0	142.661141	0	0
F2S4_160404_032_E01	VISp	L1	GABAergic	Lamp5	5	Lamp5 Plch2 Dock5	Core	0	0	0	0.63038427	0.63038427	0	37.82305618	0	0	0	0	0	0	0	0	0	0	0	0	0	0	0	0	0	0	0	227.5687213	0	0
F2S4_160404_033_H01	VISp	L1	GABAergic	Lamp5	5	Lamp5 Plch2 Dock5	Core	0	0	8.212563031	0	0	26.4627031	107.2195729	0	0	0	0	0	0.456253502	0	0	0	0	0	0	0	0	0	37.86904064	0	0	0	349.9464358	0	0
F2S4_160404_034_C01	VISp	L1	GABAergic	Lamp5	5	Lamp5 Plch2 Dock5	Core	0	0	111.0501217	0	1.057620206	10.04739196	0	0	0	0	0	0	0	0	0	0	0	0	0	0	0	0	30.67098599	0	0	0	552.6065579	0	0
F2S4_160404_035_A01	VISp	L1	GABAergic	Lamp5	5	Lamp5 Plch2 Dock5	Core	0	0	0	0	0	22.93006045	85.98772669	0	0	0	0	0	0	0	123.7267845	0	0	0	0	0	0	0	0	0	0	0	0	0	0
F2S4_160404_035_D01	VISp	L1	GABAergic	Lamp5	5	Lamp5 Plch2 Dock5	Core	0	0	0	146.7324873	0	7.110384846	108.5949686	0	0	0	0	0	0	0	106.6557727	0	0	0	0	0	0	0	0	0	0	0.646398622	0	0	0
F2S4_160404_035_F01	VISp	L1	GABAergic	Lamp5	5	Lamp5 Plch2 Dock5	Core	0	0	60.6352515	0.572030675	5.148276071	14.87279754	61.77931285	0	0	0	0	0	0	0	32.60574845	0	0	0	0.572030675	0	0	0	44.61839262	0	0	0	241.3969447	0	0
F2S4_160404_035_G01	VISp	L1	GABAergic	Lamp5	5	Lamp5 Plch2 Dock5	Core	0	0	35.8517173	228.0567573	0	6.473226734	116.0201407	0	0	0	0	0	0	0	0	0	0	0	35.8517173	0	0	0	206.645315	0	0	0	254.4476047	0	0
F2S4_160404_035_H01	VISp	L1	GABAergic	Lamp5	5	Lamp5 Plch2 Dock5	Core	0	0	0	0	0	50.07584067	0	0	3.230699398	0	0	0	0	0	21.53799599	0	0	0	7.538298595	0	0	0	8.076748495	0	61.92173846	0	170.6886182	0	0
F2S4_160404_036_B01	VISp	L1	GABAergic	Lamp5	5	Lamp5 Plch2 Dock5	Core	0	0	0	0	0	0	47.75472316	0	0	0	0	0	0	0	0	0	0	0	94.43630647	0	0	0	0	0	0	0	60.63240131	0	0
F2S4_160404_037_C01	VISp	L1	GABAergic	Lamp5	5	Lamp5 Plch2 Dock5	Core	0	0	1.812951727	0	0	9.064758636	81.58282772	0	24.77700694	0	0	0	0	0	48.34537939	0	0	0	47.13674491	79.76987599	0	0	18.12951727	0	0	0	46.53242766	0	0
F2S4_160404_037_E01	VISp	L1	GABAergic	Lamp5	5	Lamp5 Plch2 Dock5	Core	0	0	0	0	0	6.020670604	0	0	0	0	0	0	0	0	37.7660247	0	0	0	0	33.38735517	0	0	131.3600859	0	0	0	224.4068134	0	0
F2S4_160404_037_G01	VISp	L1	GABAergic	Lamp5	5	Lamp5 Plch2 Dock5	Core	0	0	0	0	0	73.64579669	0	0	0	0	0	0	0	0	206.6479071	0	0	0	0	0	0	0	179.7177278	0	0	0	148.3907844	0	0
F2S4_160404_042_G01	VISp	L5	GABAergic	Lamp5	5	Lamp5 Plch2 Dock5	Intermediate	0	0	74.5037663	12.26586396	81.31813517	0	187.6222895	0	0	0.454291258	0	0	0	0	36.79759189	0	0	0	0	0	0	0	1.817165032	0	0	0	298.0150652	0	0
F2S4_160404_049_H01	VISp	L1	GABAergic	Lamp5	5	Lamp5 Plch2 Dock5	Core	0	0	101.3504631	0	0	5.936847212	77.17901375	0	25.44363091	0	0	0	0	0	49.19101976	0	0	0	0	0	0	0	19.5067837	0	0	0	0	0	0
F2S4_160404_050_A01	VISp	L1	GABAergic	Lamp5	5	Lamp5 Plch2 Dock5	Core	0	0	0	0	0	24.02943164	110.8296235	0	16.67348318	0	0	0	0	0	0	0	0	0	0	0	0	0	7.846345025	0	0	0	304.0458697	0	0
F2S4_160404_050_C01	VISp	L1	GABAergic	Lamp5	5	Lamp5 Plch2 Dock5	Core	0	0	0	0	0	0	78.9337561	0	0	0	0	0	0	0	0	0	0	0	47.02436534	0	0	0	181.9395088	0	7.837394223	0	338.1275793	0	0
F2S4_160404_050_D01	VISp	L1	GABAergic	Lamp5	5	Lamp5 Plch2 Dock5	Core	0	0	0	0	0	25.28302802	0	0	0	0	0	0	0	0	34.0546908	0	0	0	0	0	0	0	0	0	0	0	170.7894342	0	0
F2S4_160404_050_E01	VISp	L1	GABAergic	Lamp5	5	Lamp5 Plch2 Dock5	Core	0	0	0	0	0	14.12301855	39.84708806	0	0	0	0	0	0	0	188.1387829	0	0	0	0	0	0	0	25.72406951	0	46.40420382	0	42.87344918	0	0
F2S4_160405_001_F01	VISp	L1	GABAergic	Lamp5	5	Lamp5 Plch2 Dock5	Core	0	0	0	0	0	11.19227204	194.8472814	0	0	0	0	0	0	0	21.36706481	0	0	0	15.26218915	0	0	0	35.10303504	0	0	0	112.4314601	0	0
F2S4_160405_002_A01	VISp	L1	GABAergic	Lamp5	5	Lamp5 Plch2 Dock5	Core	0	0	0	0	0	2.999596554	80.48917421	0	0	0	0	0	0	0	43.49415004	0	0	0	55.99246901	0	0	0	67.49092247	0	0	0	72.99018282	0	0
F2S4_160405_002_B01	VISp	L1	GABAergic	Lamp5	5	Lamp5 Plch2 Dock5	Core	0	0	100.6118855	0	0	17.49771922	161.8539028	0	0	0	0	0	0	0	0	0	0	0	66.10249483	0	0	0	1.944191025	0	0	0	192.9609592	0	0
F2S4_160405_002_D01	VISp	L1	GABAergic	Lamp5	5	Lamp5 Plch2 Dock5	Core	0	0	0	0	0	6.839370543	185.1515311	0	0	0	0	0.977052935	0	0	0	0	0	0	0	0	0	0	1.95410587	0	0	0	719.11096	0	0
F2S4_160405_002_E01	VISp	L1	GABAergic	Lamp5	5	Lamp5 Plch2 Dock5	Core	0	0	0	0	0	43.8629156	114.6832481	0	0	0	0	0	0	0	51.17340153	0	0	26.04360613	0	0	0	0	31.98337595	0	0	0	133.4163683	0	0
F2S4_160405_002_F01	VISp	L1	GABAergic	Lamp5	5	Lamp5 Plch2 Dock5	Core	0	0	0.483097155	68.59979604	0	133.817912	73.91386474	0	0	0	0	0	0	0	50.72520129	0	0	0	0	0	0	0	0	0	0	0	32.3675094	0	0
F2S4_160405_003_F01	VISp	L1	GABAergic	Lamp5	5	Lamp5 Plch2 Dock5	Intermediate	0	0	86.66576642	0	0	14.61225131	44.84449541	0	0	0	0	0	0	0	0	0	0	0	0	0	0	0	73.06125657	0	0	0	335.0740388	0	0
F2S4_160405_003_G01	VISp	L1	GABAergic	Lamp5	5	Lamp5 Plch2 Dock5	Core	0	0	0	0	0	51.55178941	68.73571921	0	0	0	0	0	0	0	63.90273896	0	0	0	0	0	0	0	20.40591664	0	0	0	183.116252	0	0
F2S4_160405_009_B01	VISp	L1	GABAergic	Lamp5	5	Lamp5 Plch2 Dock5	Core	0	0	4.127987424	0	0	0	30.1343082	0	0	0	0	0	0	0	0	0	0	0	106.9148743	0	0	0	95.35650951	0	0	0	28.07031449	0	0
F2S4_160405_009_D01	VISp	L1	GABAergic	Lamp5	5	Lamp5 Plch2 Dock5	Core	0	0	115.3735742	0	0	57.68678709	0	0	0	0	0	0	0	0	34.97545359	0	0	0	0	0	0	0	0	0	0	0	164.4300545	0	0
F2S4_160405_010_B01	VISp	L1	GABAergic	Lamp5	5	Lamp5 Plch2 Dock5	Core	0	0	0.860115169	0	0	43.00575847	0	0	0	0	0	0	0	0	158.2611912	0	0	0	0	0	0	0	7.741036525	0	0	0	1.720230339	0	0
F2S4_160405_010_G01	VISp	L1	GABAergic	Lamp5	5	Lamp5 Plch2 Dock5	Core	0	0	215.3496568	109.266082	0	7.956268107	107.1444105	0	0	0	0	0	0	0	0	0	0	0	0	0	0	0	53.57220525	0.530417874	0	0	578.1554825	0	0
F2S4_160405_011_A01	VISp	L1	GABAergic	Lamp5	5	Lamp5 Plch2 Dock5	Core	0	0	20.02702647	0	0	22.53040478	135.1824287	0.500675662	21.52905346	0	0	0	0	0	0	0	0	0	25.03378309	0.500675662	0	0	22.02972912	0	0	0	321.4337749	0	0
F2S4_160405_011_C01	VISp	L1	GABAergic	Lamp5	5	Lamp5 Plch2 Dock5	Core	0	0	0	0	0	32.0208846	115.2751846	0	0	0	0	0	0	0	25.61670768	0	0	0	2.910989509	263.1534516	0	0	103.0490286	0	11.64395804	0	82.08990416	0	0
F2S4_160405_011_D01	VISp	L1	GABAergic	Lamp5	5	Lamp5 Plch2 Dock5	Core	0	0	47.88489598	0	0	23.47298822	0	0	0	0	0	0	0	0	105.628447	0	0	0	0	0	0	0	41.78191904	0	0	0	77.46086114	0	0
F2S4_160405_011_F01	VISp	L1	GABAergic	Lamp5	5	Lamp5 Plch2 Dock5	Core	0	0	0	0	0	9.600360974	49.80187255	0	16.8006317	0	0	0	0	0	150.0056402	0	0	0	0	0	0	0	51.00191767	0	3.000112804	0	50.40189511	0	0
F2S4_160405_012_E01	VISp	L1	GABAergic	Lamp5	5	Lamp5 Plch2 Dock5	Core	0	0	0	0	0	23.94813391	575.3121472	0	0	0	0	0	0	0	77.97066855	0	0	0	0	73.51520177	0	0	51.2378679	0	22.83426722	0	173.2062708	0	34.5298675
F2S4_160405_014_F01	VISp	L1	GABAergic	Lamp5	5	Lamp5 Plch2 Dock5	Core	0	0	0	0	0	0	8.299949094	0	0	0	0	0	0	0	144.4191142	0	0	0	0	0	0	0	79.12618136	0	0	0	226.3119453	0	0
F2S4_160405_016_A01	VISp	L1	GABAergic	Lamp5	5	Lamp5 Plch2 Dock5	Core	0	6.596184861	0	0	0	13.66352578	37.69248492	0	0	0	0	0	0	0	36.7501728	0	0	0	86.22155925	0	0	0	0	0	1.413468184	0	211.0779155	0	0
F2S4_160405_016_G01	VISp	L1	GABAergic	Lamp5	5	Lamp5 Plch2 Dock5	Core	0	0	0	44.24733894	0	33.64641398	181.1375438	0	0	0	0	0	0	0	14.2882032	0	0	0	47.01279762	0	0	0	36.41187267	0	0	0	196.3475665	0	0
F2S4_160405_017_E01	VISp	L1	GABAergic	Lamp5	5	Lamp5 Plch2 Dock5	Core	0	0	0	0	0	38.44518192	77.36499571	0	0	0	0	0	0	0	5.695582506	0	0	0	0	0	0	0	28.00328066	0	0	0	0	0	0
F2S4_160405_020_A01	VISp	L1	GABAergic	Lamp5	5	Lamp5 Plch2 Dock5	Core	0	0	0	0	0	17.59263354	220.1456575	0	0	0	0	0	0	0	0	0	0	0	0	0	0	0	0	0	0	0	12.36239113	0	0
F2S4_160405_020_B01	VISp	L1	GABAergic	Lamp5	5	Lamp5 Plch2 Dock5	Core	0	0	168.7116946	0	0	13.93488923	80.62328769	0	0	0	0	0	0	0	0	0	0	0	21.40000846	0	0	0	152.2884323	0	0	0	0.497674615	0	0
F2S4_160405_020_D01	VISp	L1	GABAergic	Lamp5	5	Lamp5 Plch2 Dock5	Core	0	0	0	0	0	1.628807745	57.551207	0	0	0	0	0	0	0	0	0	0	0	0	0	0	0	78.18277177	0	0	0	295.3571378	0	0
F2S4_160405_020_G01	VISp	L1	GABAergic	Lamp5	5	Lamp5 Plch2 Dock5	Core	0	0	0	0	0	48.578538	7.360384546	0	0	0	0	0	0	0	0	0	0	0	0	0	0	0	8.341769152	0	0	0	289.5084588	0	0
F2S4_160405_021_C01	VISp	L1	GABAergic	Lamp5	5	Lamp5 Plch2 Dock5	Core	0	0	0	0	0	37.16628672	39.32711734	0	0	0	0	0	0	0	157.7406355	0	0	0	64.39275257	15.55798049	0	0	317.2099355	0	0	0	0	0	0
F2S4_160405_022_F01	VISp	L1	GABAergic	Lamp5	5	Lamp5 Plch2 Dock5	Intermediate	0	0	0	0	0	33.48216744	217.1935335	0	0	0	0	0	0	0	0	0	0	0	0.440554835	0	0	0	0	0	0	0	393.4154674	0	0
F2S4_160405_023_E01	VISp	L1	GABAergic	Lamp5	5	Lamp5 Plch2 Dock5	Core	0	0	0	0	0	27.43626082	43.79249323	0	0	0	0	0	0	0	0	0	0	0	53.81728083	0	0	0	1.582861201	0	0	0	154.5927773	0	0
F2S4_160405_023_G01	VISp	L1	GABAergic	Lamp5	5	Lamp5 Plch2 Dock5	Core	0	0	0	22.74896179	0	16.4929973	127.9629101	0	0	0	0	0	0	0	3.412344269	0	0	0	0.568724045	0	0	0	55.7349564	0	3.981068314	0	387.3010745	0	0
F2S4_160405_031_A01	VISp	L1	GABAergic	Lamp5	5	Lamp5 Plch2 Dock5	Core	0	0	0	0	0	0	116.5186206	0	0	0	0	0	0	0	0	0	0	0	0	0	0	0	127.4593361	0	0	0	89.16683169	0	0
F2S4_160405_032_A01	VISp	L1	GABAergic	Lamp5	5	Lamp5 Plch2 Dock5	Core	0	0	0	0	0	1.070405379	93.66047063	0	0	0	0	0	0	0	2.140810757	0	0	0	0	0	0	0	9.633648407	0	23.01371564	0	50.30905279	0	0
F2S4_160405_032_C01	VISp	L1	GABAergic	Lamp5	5	Lamp5 Plch2 Dock5	Core	0	0	0	0	0	0	0	0	0	0	0	0	0	0	25.86685643	0	0	0	0	0	0	0	0	0	0	0	169.9821994	0	0
F2S4_160405_032_D01	VISp	L1	GABAergic	Lamp5	5	Lamp5 Plch2 Dock5	Core	0	0	24.1176685	0	0	84.67981383	1.607844566	0	0	0	0	0	0	0	0	0	0	0	38.58826959	0	0	0	67.52947179	0	0	0	0	0	0
F2S4_160405_032_G01	VISp	L1	GABAergic	Lamp5	5	Lamp5 Plch2 Dock5	Intermediate	0	0	11.47871571	0	0	0	213.5041121	0	0	0	0	0	0	0	0	0	0	0	0	0	0	0	35.35444438	0	15.15190473	0	68.87229424	0	0
F2S4_160405_033_A01	VISp	L1	GABAergic	Lamp5	5	Lamp5 Plch2 Dock5	Core	0	0	0	0	0	0	0	0	0	0	0	0	0	0	58.19148278	0	0	0	0	0	0	0	0	0	0	0	322.1692092	0	0
F2S4_160405_033_C01	VISp	L1	GABAergic	Lamp5	5	Lamp5 Plch2 Dock5	Core	0	0	0	0	0	0	215.4574486	0	0	0	0	0	0	0	59.52134996	0	0	0	0	0	0	0	0	0	0	0	44.76399047	0	0
F2S4_160405_040_D01	VISp	L4	GABAergic	Lamp5	5	Lamp5 Plch2 Dock5	Core	0	0	50.36946539	0	0	33.22241334	124.8519727	0	0	0	0	0	0	0	73.94666195	0	0	0	0	0	0	0	46.61854775	0	0	0	197.7269439	0	0
F2S4_160405_042_C01	VISp	L1	GABAergic	Lamp5	5	Lamp5 Plch2 Dock5	Core	0	0	0	0	0	37.18108767	308.1523478	0	0	0	0	0	0	0	13.52039552	0	0	0	0.563349813	0	0	0	204.4959822	0	0	0	73.79882553	0	0
F2S4_160405_042_G01	VISp	L1	GABAergic	Lamp5	5	Lamp5 Plch2 Dock5	Intermediate	0	0	0	0	0	0	40.17007537	0	12.28731717	0	0	0	0	0	0	0	0	0	47.2589122	0	0	0	13.70508454	0	0	0	0	0	0
F2S4_160405_043_B01	VISp	L1	GABAergic	Lamp5	5	Lamp5 Plch2 Dock5	Core	0	0	0	144.6538624	39.80784585	60.5527796	341.4503961	0	0	0	0	0	0	0	0	0	0	0	0	0	0	0	35.88312865	0	0	0	132.8797108	0	0
F2S4_160405_043_C01	VISp	L1	GABAergic	Lamp5	5	Lamp5 Plch2 Dock5	Core	0	0	0	0	0	3.502575853	0	0	0	0	0	0	0	0	60.71131478	0	0	25.10179361	118.5038163	0	0	0	126.6764933	0	0	0	129.0115439	0	112.6661899
F2S4_160405_043_D01	VISp	L1	GABAergic	Lamp5	5	Lamp5 Plch2 Dock5	Core	0	0	0	0	0	0	206.7948493	0	0	0	0	0	0	0	0	0	0	0	146.9034449	0	0	0	51.41620571	0	0	0	22.03551673	0	0
F2S4_160405_043_E01	VISp	L1	GABAergic	Lamp5	5	Lamp5 Plch2 Dock5	Intermediate	0	0	0	0	0	0	52.29465237	0	0	302.1468804	0	0	0	0	24.29852534	0	0	0	0	0	0	0	34.33487277	0	0	0	0	0	0
F2S4_160405_043_H01	VISp	L1	GABAergic	Lamp5	5	Lamp5 Plch2 Dock5	Core	0	0	0	0	0	18.13555796	64.00785163	0	0	0	0	0	0	0	81.07661206	0	0	0	81.07661206	0	0	0	33.60412211	0	1.600196291	0	548.8673277	0	0
F2S4_160405_044_A01	VISp	L1	GABAergic	Lamp5	5	Lamp5 Plch2 Dock5	Core	0	0	0	0	0	57.48345046	0	0	0	0	0	0	0	0	0	0	0	0	111.170824	0	0	0	0	0	0	0	114.9669009	0	0
F2S4_160405_044_C01	VISp	L1	GABAergic	Lamp5	5	Lamp5 Plch2 Dock5	Intermediate	0	0	0	0	0	54.13450979	50.91859831	0	0	0	0	0	0	0	10.18371966	0	0	0	0	0	0	0	6.96780819	0	0	0	0	0	0
F2S4_160413_007_E01	VISp	L1	GABAergic	Lamp5	5	Lamp5 Plch2 Dock5	Core	0	0	52.95141863	0	56.45555663	0	72.02950328	0	0	0	0	0	0	0	0	0	0	0	0	0	0	0	118.3619946	0	13.23785466	0.389348666	399.4717317	0	0
F2S4_160413_007_H01	VISp	L1	GABAergic	Lamp5	5	Lamp5 Plch2 Dock5	Core	0	0	0	0	0	3.935487244	14.61752405	0	0	0	0	0	0	0	0	0	0	0	0	0	0	0	143.9263906	0	0	0	209.7052489	0	0
F2S4_160413_008_C01	VISp	L1	GABAergic	Lamp5	5	Lamp5 Plch2 Dock5	Core	0	0	0	0	7.597700092	23.21519472	102.1468568	0	0	0	0	0	0	0	0	0	0	0	0	0	0	0	272.6730144	0	0	0	352.4488654	0	0
F2S4_160413_008_H01	VISp	L1	GABAergic	Lamp5	5	Lamp5 Plch2 Dock5	Core	0	0	48.38423777	0	0	0	97.67285382	0	0	0	0	0	0	0	0	0	0	0	0	0	0	0	91.34220589	0	0	0	92.24658416	0	0
F2S4_160413_009_A01	VISp	L1	GABAergic	Lamp5	5	Lamp5 Plch2 Dock5	Core	0	0	0	0	0	0	246.3301696	0	0	0	0	0	0	0	0	0	0	0.889278591	61.36022275	0	0	0	94.2635306	0	0	0	66.25125499	0	0
F2S4_160413_009_H01	VISp	L1	GABAergic	Lamp5	5	Lamp5 Plch2 Dock5	Core	0	0	0	0	0	0	0	0	33.56027864	0	0	0	0	0	15.56418719	0	0	0	2.431904249	0	0	0	118.1905465	0	0	0	0	0	0
F2S4_160414_008_C01	VISp	L1	GABAergic	Lamp5	5	Lamp5 Plch2 Dock5	Core	0	0	79.20700586	0	0	42.35374619	166.1146928	0	0	0	0	0	0	0	0	0	0	0	0	0	0	0	194.1671741	0	0	0	837.7240967	0	0
F2S4_160414_009_D01	VISp	L1	GABAergic	Lamp5	5	Lamp5 Plch2 Dock5	Core	0	0	4.211348637	0	0	0	246.8903138	0	0	0	0	0	0	0	83.17413558	0	0	0	8.422697274	22.10958034	0	0	135.289575	0	0	0	14.73972023	0	0
F2S4_160414_009_F01	VISp	L1	GABAergic	Lamp5	5	Lamp5 Plch2 Dock5	Core	0	0	0	45.97926187	73.66569912	0	40.04645389	0	0	0	0	0	0	0	110.745749	0	0	1.483201996	9.39361264	228.4131074	0	0	61.80008316	0	19.77602661	0	0	0	0
F2S4_160414_009_H01	VISp	L1	GABAergic	Lamp5	5	Lamp5 Plch2 Dock5	Core	0	0	13.49354238	0	0	0	14.77864165	0	0	0	0	0	0	0	0	0	0	0	0	0	0	0	32.12748185	0	0	0	287.8622374	0	0
F2S4_160414_010_F01	VISp	L1	GABAergic	Lamp5	5	Lamp5 Plch2 Dock5	Core	0	0	174.7888625	0	0	6.490833089	0	0	0	0	0	0	0	0	0.463630935	0	0	0	0	0	0	0	0.92726187	0	0	0	149.752792	0	0
F2S4_160414_010_H01	VISp	L1	GABAergic	Lamp5	5	Lamp5 Plch2 Dock5	Core	0	0	0	0	0	0	0	0	0	0	0	0	0	0	0	0	0	0	0	0	0	0	13.42101731	0	0	0	0	0	0
F2S4_160415_015_F01	VISp	L1	GABAergic	Lamp5	5	Lamp5 Plch2 Dock5	Core	0	0	0	0	0	0	259.4258881	0	0	0	0	0	0	0	0.969816404	0	0	0	0	0	0	0	96.98164041	0	0	0	0	0	0
F2S4_160415_015_H01	VISp	L1	GABAergic	Lamp5	5	Lamp5 Plch2 Dock5	Core	0	0	0	0.872238058	0	1.744476116	45.79249805	0	0	0	0	0	0	0	0	0	0	0	0	0	0	0	76.32083009	0	0	0	0.436119029	0	0
F2S4_160415_016_A01	VISp	L1	GABAergic	Lamp5	5	Lamp5 Plch2 Dock5	Core	0	0	0	0	0	0	133.0851467	0	63.62993546	0	0	0	0	0	0	0	0	0	0	0	0	0	57.35656155	0	0	0	0	0	0
F2S4_160415_016_E01	VISp	L1	GABAergic	Lamp5	5	Lamp5 Plch2 Dock5	Core	0.480470554	0	0	0	0	0	0	0	0	0	0	0	0	0	0.960941107	0	0	0	0	0	0	0	33.1524682	0	0	0.480470554	129.7270495	0	0
F2S4_160415_016_F01	VISp	L1	GABAergic	Lamp5	5	Lamp5 Plch2 Dock5	Core	0	0	89.89697422	0	0	20.67149675	105.7611461	0	0	0	0	0	0	0	0	0	0	0	0	0	0	0	88.93550926	0	0	37.49713363	229.3093941	0	0
F2S4_160415_017_C01	VISp	L1	GABAergic	Lamp5	5	Lamp5 Plch2 Dock5	Core	0	0	0	0	0	112.796711	39.95937295	0	0	0	0	0	0	0	257.9655722	0	0	0	0	112.796711	0	0	358.6227269	0	0	0	0	0	0
F2S4_160415_018_C01	VISp	L1	GABAergic	Lamp5	5	Lamp5 Plch2 Dock5	Core	0	0	0	0	0	9.394885326	67.74206787	0	41.53528249	0	0	0	0	0	38.07400895	0	0	0	0	52.41357076	0	0	49.44676487	0	0	0	0	0	0
F2S4_160415_018_E01	VISp	L1	GABAergic	Lamp5	5	Lamp5 Plch2 Dock5	Core	0	0	2.581147593	0	0	2.212412223	58.6289239	0	0	0	0	0	0	0	7.005972038	0	0	0	0.36873537	56.78524705	0	0	42.4045676	0	0	0	27.65515278	0	0
F2S4_160415_020_B01	VISp	L1	GABAergic	Lamp5	5	Lamp5 Plch2 Dock5	Core	0	0	0	0	0.658959477	0	0	0	98.84392149	0	0	0	0	0	41.51444703	0	0	0	7.248554243	124.5433411	0	0	0.658959477	0	0	0	86.32369144	0	0
F2S4_160415_020_D01	VISp	L1	GABAergic	Lamp5	5	Lamp5 Plch2 Dock5	Core	0	0	0	0	0	0	0	0	0	0	0	0	0	0	121.0314171	0	0	0	151.4326735	0	0	0	64.81777315	0	0	0	144.5493702	0	0
F2S4_160415_021_A01	VISp	L1	GABAergic	Lamp5	5	Lamp5 Plch2 Dock5	Core	0	0	0	0	0	26.05341661	81.71298846	0	0	0	0	0	0	0	101.845174	0	0	0	0	0	0	0	8.881846571	0	0	0	223.8225336	0	0
F2S4_160415_021_D01	VISp	L1	GABAergic	Lamp5	5	Lamp5 Plch2 Dock5	Core	0	0	0	0	0	22.4016732	90.11582174	0	0	0	0	0	0	0	0	0	0	0	0	0	0	0	16.8012549	0	0	0	265.7653048	0	0
F2S4_160415_021_E01	VISp	L1	GABAergic	Lamp5	5	Lamp5 Plch2 Dock5	Core	0	0	0.486640738	0	0	67.64306264	163.5112881	0	12.16601846	0	0	0	0	0	84.67548849	0	0	0	71.53618855	0	0	0	79.32244037	0	0	0	202.9291879	0	0
F2S4_160415_021_G01	VISp	L1	GABAergic	Lamp5	5	Lamp5 Plch2 Dock5	Core	0	0	0	0	46.23779244	26.03681516	0	0	0	0	0	0	0	0	106.8407243	0	0	0	0	0	0	0	0	0	0	0	208.7434319	0	0
F2S4_160415_023_D01	VISp	L1	GABAergic	Lamp5	5	Lamp5 Plch2 Dock5	Core	0	0	199.6275537	0	0	0	66.73428307	0	0	0	0	0	0	0	0	0	0	0	0	0	0	0	10.93061533	0	0	0	277.8677476	0	0
F2S4_160415_023_E01	VISp	L1	GABAergic	Lamp5	5	Lamp5 Plch2 Dock5	Core	0	0	0	0	0	0	1.913698573	0	0	0	0	0	0	0	45.92876576	0	0	0	0	24.24018193	0	0	88.03013437	0	0	0	0	0	0
F2S4_160419_001_C01	VISp	L1	GABAergic	Lamp5	5	Lamp5 Plch2 Dock5	Core	0	0	0	35.89798608	0	4.48724826	48.54386754	0	0	0	0	0	0	0	75.4673571	0	0	0	6.93483822	0	0	0	3.26345328	0	29.77901118	0	21.21244632	0	0
F2S4_160419_001_H01	VISp	L1	GABAergic	Lamp5	5	Lamp5 Plch2 Dock5	Core	0	0	0	0	0	10.3988816	0	0	0	0	0	0	0	0	36.3960856	0	0	0	177.4309173	0	0	0	62.3932896	0	16.2482525	0.6499301	311.966448	0	0
F2S4_160419_002_H01	VISp	L1	GABAergic	Lamp5	5	Lamp5 Plch2 Dock5	Intermediate	0	0	0	0	0	9.211887587	0	0	0	0	0	0	0	0	116.9201117	0	0	0	67.31764006	0	0	0	4.960247162	0	0	0	0	0	0
F2S4_160419_003_B01	VISp	L1	GABAergic	Lamp5	5	Lamp5 Plch2 Dock5	Core	0	0	0	0	1.688209153	0	0	0	0	0	0	0	0	0	63.58921144	0	0	0	0	90.6005579	0	0	0	0	0	0	6.190100229	0	0
F2S4_160419_003_F01	VISp	L1	GABAergic	Lamp5	5	Lamp5 Plch2 Dock5	Intermediate	0	0	0	0	0	71.48335225	170.2273049	0	0	0	0	0	0	0	0	0	0	0	0	0	0	0	236.8643282	0	0	0	117.5234774	0	0
F2S4_160419_003_G01	VISp	L1	GABAergic	Lamp5	5	Lamp5 Plch2 Dock5	Core	0	0	0	0	0	0	0	0	0	0	0	0	0	0	0	0	0	0	0	0	0	0	115.1988614	0	0	0	0	0	0
F2S4_160419_011_F01	VISp	L2/3	GABAergic	Lamp5	5	Lamp5 Plch2 Dock5	Core	0	0	47.63561927	0	0	0	42.34277268	0	0	0	0	0	0	0	10.58569317	0	0	0	0	28.4490504	0	0	22.49459799	0	21.17138634	0	0.661605823	0	0
F2S4_160419_014_D01	VISp	L1	GABAergic	Lamp5	5	Lamp5 Plch2 Dock5	Core	0	0	0	0	0	77.77765993	0	0	0	0	0	0	0	0	204.0400949	0	0	0	92.92915213	0	0	0	26.26258647	0	0	0	4.545447658	0	0
F2S4_160419_016_G01	VISp	L4	GABAergic	Lamp5	5	Lamp5 Plch2 Dock5	Core	0.554491548	0	0	0	0	2.217966192	54.34017169	0	0	0	0	0	0	9.426356314	161.3570404	0	0	0	44.91381538	0	0	0	37.70542526	0	0	0	266.155943	0	0
F2S4_160422_009_B01	VISp	L2/3	GABAergic	Lamp5	5	Lamp5 Plch2 Dock5	Core	0	0	0	0	0	0	76.36876604	0	0	0	0	0	0	0	0	0	0	0	0	0	0	0	231.2676783	0	0	0	0	0	0
F2S4_160429_001_A01	VISp	L1	GABAergic	Lamp5	5	Lamp5 Plch2 Dock5	Core	0	0	0	0	33.74430902	0	42.74279143	0	0	0	0	0	0	0	0	0	0	0	0	0	0	0	16.64719245	0	0	0	411.230646	0	0
F2S4_160429_001_D01	VISp	L1	GABAergic	Lamp5	5	Lamp5 Plch2 Dock5	Core	0	0	0	0	0	0	108.0806023	0	0	0	0	0	0	0	0	0	0	0	207.3699594	263.2202228	0	0	16.03109412	0	0	0	1.034264137	0	0
F2S4_160429_001_F01	VISp	L1	GABAergic	Lamp5	5	Lamp5 Plch2 Dock5	Core	0	0	0	0	0	0	0	0	4.980947874	0	0	0	0	0	0	0	0	0	0	0	0	0	104.5999054	0	0	0	359.0810604	0	0
F2S4_160429_002_A01	VISp	L1	GABAergic	Lamp5	5	Lamp5 Plch2 Dock5	Core	0	0	80.27371823	0	0	11.61192151	0	0	0	0	0	0	0	0	19.68977994	0	0	0	0.504866152	0	0	0	0	0	0	0	230.2189655	0	0
F2S4_160429_002_C01	VISp	L1	GABAergic	Lamp5	5	Lamp5 Plch2 Dock5	Core	0	0	0	0	0	0	0	0	0	0	0	0	0	0	0.586268536	0	0	0	0	86.18147474	0	0	76.21490963	0	62.14446477	0	58.62685356	0	0
F2S4_160429_002_H01	VISp	L1	GABAergic	Lamp5	5	Lamp5 Plch2 Dock5	Core	0	0	0	0	43.08565883	32.31424412	104.8795642	0	0	0	0	0	0	0	0	0	0	0	0	69.73073731	0	0	65.1954048	0	43.65257539	0	74.26606982	0	0
F2S4_160429_003_B01	VISp	L1	GABAergic	Lamp5	5	Lamp5 Plch2 Dock5	Core	0	0	0	0	0	0.476706681	57.68150845	0	0	0	0	0	0	0	0	0	0	0	0	0	0	0	21.92850735	0	0	0	0	0	0
F2S4_160429_007_C01	VISp	L1	GABAergic	Lamp5	5	Lamp5 Plch2 Dock5	Core	0	0	0	0	0	0.579286342	81.67937428	0	0	0	0	0	0	0	78.78294257	0	0	0	0	0	0	0	0	0.579286342	0	0	245.6174092	0	0
F2S4_160429_007_G01	VISp	L1	GABAergic	Lamp5	5	Lamp5 Plch2 Dock5	Core	0	0	77.35713078	0	0	107.9503463	99.64647354	0	0	0	0	0	0	0	0	0	0	0	0	0	0	0	39.77118023	0	0	0	428.3050179	0	0
F2S4_160429_008_A01	VISp	L1	GABAergic	Lamp5	5	Lamp5 Plch2 Dock5	Core	0	0	27.02771368	0	0	4.324434188	26.4871594	0	0	0	0	0	0	0	56.21764445	0	0	32.97381069	48.64988462	0	0	0	2.702771368	0	0	0	509.2021257	0	0
F2S4_160429_008_E01	VISp	L1	GABAergic	Lamp5	5	Lamp5 Plch2 Dock5	Core	0	0	0	0	0	67.46746416	74.35189928	0	0	0	0	0	0	0	0	0	0	0	0	0	0	0	99.1358657	0	0	0	0	0	0
F2S4_160429_008_H01	VISp	L1	GABAergic	Lamp5	5	Lamp5 Plch2 Dock5	Core	0	0	0	0	0	62.15494201	62.75838805	0	0	0	0	0	0	0	58.53426578	0	0	0	0	0	0	0	0	0	0	0	739.8248438	0	0
F2S4_160429_009_G01	VISp	L1	GABAergic	Lamp5	5	Lamp5 Plch2 Dock5	Core	0	0	0	0.494072611	0	0	282.1154608	0	0	0	0	0	0	0	79.54569035	0	0	0	89.42714257	247.0363054	0	0	102.2730305	0	0	0	0	0	0
F2S4_160429_015_B01	VISp	L5	GABAergic	Lamp5	5	Lamp5 Plch2 Dock5	Core	0	0	0	0	0	31.23411297	0	0	0	0	0	0	0	0	167.46801	0	0	0	0	362.8473549	0	0	336.9296867	0	0	0	55.82266999	0	0
F2S4_160502_007_A01	VISp	L1	GABAergic	Lamp5	5	Lamp5 Plch2 Dock5	Core	0	0	0	0	0	0	0	0	0	0	0	0	0.452874143	0	0	0	0	0	0	4.075867288	0	0	74.72423361	0	0	0	0.452874143	0	0
F2S4_160502_007_D01	VISp	L1	GABAergic	Lamp5	5	Lamp5 Plch2 Dock5	Core	0.850758643	0	0.425379321	0	0	41.68717349	76.99365717	0	0	0	0	0	0	0	164.6217974	0	0	0	0	0	0	0	30.20193182	0	0	0	84.22510563	0	0
F2S4_160502_007_E01	VISp	L1	GABAergic	Lamp5	5	Lamp5 Plch2 Dock5	Core	0	0	0	0	0	75.38100022	0	0	0	0	0	0	0	0	0	0	0	0	0	0.48321154	0	0	21.74451929	0	0	0	53.15326939	0	0
F2S4_160502_007_F01	VISp	L1	GABAergic	Lamp5	5	Lamp5 Plch2 Dock5	Core	0	0	0	0	0	9.179717165	186.5151624	0	0	0	0	0	0	0	36.71886866	0	0	0	104.3149678	0	0	0	151.4653332	0	0	0	90.12813216	0	0
F2S4_160502_007_G01	VISp	L1	GABAergic	Lamp5	5	Lamp5 Plch2 Dock5	Core	0	0	0	0	0	0	0	0	0	0	0	0	0	0	236.6660997	0	0	0	0	0	0	0	0	0	0	0	0	0	0
F2S4_160502_007_H01	VISp	L1	GABAergic	Lamp5	5	Lamp5 Plch2 Dock5	Core	0	0	0	0	0	51.76328603	30.77817007	0	0	0	0	0	0	0	0	0	0	0	0	0	0	0	1.865343641	0	0	0	192.5967309	0	0
F2S4_160502_008_F01	VISp	L1	GABAergic	Lamp5	5	Lamp5 Plch2 Dock5	Core	0	0	0	0	0	80.15425642	0	0	0	0	0	0	0	0	1.350914434	0	0	0	0	0	0	0	144.0975396	0	20.71402132	0	0	0	0
F2S4_160502_012_G01	VISp	L2/3	GABAergic	Lamp5	5	Lamp5 Plch2 Dock5	Core	0	0	0	0	0	0	0	0	0	0	0	0	0	0	41.10695584	0	0	0	0	0	0	0	149.5698875	0.495264528	0	0	1.485793585	0	0
F2S4_160502_014_B01	VISp	L2/3	GABAergic	Lamp5	5	Lamp5 Plch2 Dock5	Core	0	0	36.13160192	0	0.531347087	33.47486649	56.85413832	0	18.06580096	0	0	0	0	0	0	0	0	24.97331309	46.75854366	0	0	0	82.89014558	0	8.501553393	5.313470871	231.1359829	0	0
F2S4_160502_017_F01	VISp	L1	GABAergic	Lamp5	5	Lamp5 Plch2 Dock5	Core	0	0	0	176.5908902	0	0	0	0	0.503107949	0	0	0	0	0	18.11188618	0	0	0	157.4727881	0	0	0	6.540403342	0	0	0	88.54699909	0	0
F2S4_160502_017_H01	VISp	L1	GABAergic	Lamp5	5	Lamp5 Plch2 Dock5	Core	0	0	0	0	0	11.62250704	81.86287564	0	0	0	0	0	0	0	79.84157007	0	0	0	0	8.085222286	0	0	81.35754925	0	20.71838211	0	0	0	0
F2S4_160502_018_B01	VISp	L1	GABAergic	Lamp5	5	Lamp5 Plch2 Dock5	Core	0	0	0	0	0	0	0	0	0	0	0	0	0	0	100.7107138	0	0	0	0	54.57507956	0	0	0	0	0	0	90.02074978	0	0
F2S4_160502_018_F01	VISp	L1	GABAergic	Lamp5	5	Lamp5 Plch2 Dock5	Core	0	0	0	0	0	3.727871753	70.29701019	0	0	0	0	0	0	0	166.6891227	0	0	0	0	0	0	0	22.89978362	0	0	0	0	0	0
F2S4_160502_019_D01	VISp	L1	GABAergic	Lamp5	5	Lamp5 Plch2 Dock5	Intermediate	0	0	0	0	0	0	70.76559002	0	0	0	0	0	0	0	0	0	0	0	28.61843714	0	0	0	111.8720725	0	0	0	0	0	0
F2S4_160502_019_E01	VISp	L1	GABAergic	Lamp5	5	Lamp5 Plch2 Dock5	Core	0	0	0	0	0.43855129	27.62873125	55.2574625	0	0	0	0	0	0	0	0	0	0	0	3.946961607	32.89134673	0	0	105.2523095	0	9.648128373	0	69.72965506	0	0
F2S4_160502_019_F01	VISp	L1	GABAergic	Lamp5	5	Lamp5 Plch2 Dock5	Core	0	0	0	0	0	0	44.57281415	0	0	0	0	0	0	0	69.61849067	0	0	0	0	38.62977226	0	0	82.35358043	0	0	0	22.49865857	0	0
F2S4_160504_001_F01	VISp	L1	GABAergic	Lamp5	5	Lamp5 Plch2 Dock5	Core	0	0	0	0	0	116.3649335	0	0	0	0	0	0	0	0	0	0	0	0	0	0	0	0	51.65733028	0	0	0	8.156420571	0	0
F2S4_160504_001_G01	VISp	L1	GABAergic	Lamp5	5	Lamp5 Plch2 Dock5	Core	0	0	0	0	0	6.290336785	0	0	0	0	0	0	0	0	36.69363124	0	0	0	73.38726249	0	0	0	0.524194732	0	0	0	0.524194732	0	0
F2S4_160504_002_A01	VISp	L1	GABAergic	Lamp5	5	Lamp5 Plch2 Dock5	Intermediate	0	0	0	0	0	27.60356057	87.65341163	0	0	0	0	0	0	0	0	0	0	0	0	67.31394595	0	0	104.6029664	0	0	0	406.7893136	0	0.968545985
F2S4_160504_002_B01	VISp	L1	GABAergic	Lamp5	5	Lamp5 Plch2 Dock5	Core	0	0	0	0	0	0	136.3579452	0	0	0	0	0	0	0	0	0	0	0	0	0	0	0	41.05945561	0	0	0	313.2684391	0	0
F2S4_160504_002_D01	VISp	L1	GABAergic	Lamp5	5	Lamp5 Plch2 Dock5	Core	0	0	0	0	38.28775209	60.37683984	0	0	0	0	0	0	0	0	66.75813185	0	0	0	0	0	0	0	124.6806286	0	0	0	0	0	0
F2S4_160504_003_E01	VISp	L1	GABAergic	Lamp5	5	Lamp5 Plch2 Dock5	Core	0	0	0	0	0	103.719931	0	0	0	0	0	0	0	0	92.19549426	0	0	0	0	0	0	0	16.76281714	0	0	0	75.43267712	0	0
F2S4_160504_003_F01	VISp	L1	GABAergic	Lamp5	5	Lamp5 Plch2 Dock5	Core	0	0	0	0	0	0.853024334	319.457613	0	0	0	0	0	0	0	58.85867903	0	0	0	0	0	0	0	28.14980302	0	0	0	60.99123987	0	0
F2S4_160504_004_B01	VISp	L1	GABAergic	Lamp5	5	Lamp5 Plch2 Dock5	Core	0	0	0	0	0	0	58.76942844	0	0	0	0	0	0	0	63.79245652	0	0	0	0	0	0	0	25.11514036	0	22.60362632	0	0	0	0
F2S4_160504_005_C01	VISp	L1	GABAergic	Lamp5	5	Lamp5 Plch2 Dock5	Core	9.654352719	0	130.8701146	0	142.6698791	9.11799979	9.654352719	0	0	0	0	0	0	0	0	0	0	0	0	0	0	0	143.7425849	0	0	0	0	0	0
F2S4_160504_005_E01	VISp	L1	GABAergic	Lamp5	5	Lamp5 Plch2 Dock5	Core	0	0	0.545424002	0	0	114.5390404	0	0	0	0	0	0	0	0	205.6248486	0	0	0	0	87.26784027	0	0	0	0	0	0	26.72577608	0	0
F2S4_160504_005_H01	VISp	L1	GABAergic	Lamp5	5	Lamp5 Plch2 Dock5	Core	0	0	0	0	0	0	65.08797337	0	0	0	0	0	0	0	0.581142619	0	0	0	83.68453719	0	0	0	186.5467808	0	0	0	169.1125022	0	0
F2S4_160504_006_C01	VISp	L1	GABAergic	Lamp5	5	Lamp5 Plch2 Dock5	Core	0	0	87.23748878	0	3.333916769	38.89569564	78.90269686	0	0	0	0	0	0	0	0	0	0	0	0	0	0	0	16.66958384	0	0	0	353.3951775	0	0
F2S4_160504_006_G01	VISp	L1	GABAergic	Lamp5	5	Lamp5 Plch2 Dock5	Core	0	0	0	0	0	0	0	0	0	0	0	0	0	0	23.92691679	0	0	0	0	0	0	0	0	0	0	0	2.08060146	0	0
F2S4_160504_009_D01	VISp	L1	GABAergic	Lamp5	5	Lamp5 Plch2 Dock5	Core	0	0	0	0	0	14.70671862	78.92605658	0	13.23604676	0	0	0	0	0	78.43583263	0	0	0	0	0	0	0	0	0	0	0	0	0	0
F2S4_160504_010_G01	VISp	L1	GABAergic	Lamp5	5	Lamp5 Plch2 Dock5	Core	0	0	0.449464463	0	0	70.11645624	95.28646618	0	0	0	0	0	0	0	0	0	0	8.090360336	0	0	0	0	85.84771245	0	0	0	0	0	0
F2S4_160516_008_H01	VISp	L2/3	GABAergic	Lamp5	5	Lamp5 Plch2 Dock5	Core	0	0	132.9468349	0	98.15700897	0	0	0	0	0	0	0	0	0	0	0	0	0	0	0	0	0	108.7182061	0	0	0	348.5195065	0	0
F2S4_160516_014_H01	VISp	L2/3	GABAergic	Lamp5	5	Lamp5 Plch2 Dock5	Core	0	0	0.56412429	0	150.6211855	33.84745741	0	0	0	0	0	0	0	0	14.66723154	0	0	0	0	111.6966094	0	0	0	0	0	36.66807886	508.8401097	0	0
F2S4_160616_011_F01	VISp	L1	GABAergic	Lamp5	5	Lamp5 Plch2 Dock5	Core	0	0	0	0	0	0	144.7683194	0	0	0	0	0	0	0	0	0	0	0	0	0	0	0	100.1057527	0	0	0	0	0	0
F2S4_160616_013_H01	VISp	L1	GABAergic	Lamp5	5	Lamp5 Plch2 Dock5	Core	0	0	0	0	0	19.28008175	33.56162378	0	0	0	0	0	0	0	159.9532708	0	0	0	0	0	0	0	0	0	0	0	67.12324757	0	0
F2S4_160616_014_E01	VISp	L1	GABAergic	Lamp5	5	Lamp5 Plch2 Dock5	Core	0	0	0	0	0	36.2576141	0	0	19.3790696	0	0	0	0	0	0	0	0	0	0	0	0	0	19.3790696	0	0	0	0	0	0
F2S4_160616_015_H01	VISp	L1	GABAergic	Lamp5	5	Lamp5 Plch2 Dock5	Core	0	0	0	0	0	35.23572997	0	0	0	0	0	0	0	0	19.37965148	0	0	0	0	0	0	0	153.2754254	0	0	0	36.99751647	0	0
F2S4_160802_006_C01	VISp	L1-L4	GABAergic	Lamp5	5	Lamp5 Plch2 Dock5	Core	0	0	0	0	0	0	373.7027229	0	0	0	0	0	0	0	63.73224731	0	0	0	0	0	0	0	0	0	0	0	0	0	0
F2S4_160802_007_F01	VISp	L1-L4	GABAergic	Lamp5	5	Lamp5 Plch2 Dock5	Core	0	0	0	28.7734094	0	0.992186531	0	0	0	0	0	0	0	0	50.10541982	0	0	0	0	0.496093266	0	0	95.74600025	0	32.74215553	0	0	0	0
F2S4_160826_001_C01	VISp	L2/3	GABAergic	Lamp5	5	Lamp5 Plch2 Dock5	Core	0	0	102.7286543	0	26.18573542	17.12144239	0	0	12.58929588	0	0	0	0	0	0	0	0	0	13.59643955	0	0	0	55.89647369	0	0	0	133.9501081	0	0
F2S4_161004_010_B01	VISp	L1-L2/3	GABAergic	Lamp5	5	Lamp5 Plch2 Dock5	Core	0	0	70.89074492	0	0	104.4420898	0	0	0	0	0	0	0	0	85.50181448	0	0	0	0	0	0	0	0.541150725	0	0	0	209.9664811	0	0
F2S4_161004_011_E01	VISp	L1-L2/3	GABAergic	Lamp5	5	Lamp5 Plch2 Dock5	Core	0	0	11.972277	0	0.59861385	123.9130669	20.35287089	0	0	0	0	46.69188028	0	0	0	0	0	0	0	0	0	0	0	0	0	0	296.9124695	0	0
F2S4_161004_013_D01	VISp	L1-L2/3	GABAergic	Lamp5	5	Lamp5 Plch2 Dock5	Core	0	0	0	0	0	31.46477736	0	0	0.484073498	0	0	0	0	0	0	0	0	0	0	0	0	0	14.52220494	0	0.484073498	0	860.6826792	0	0
F2S4_161004_017_B01	VISp	L1-L2/3	GABAergic	Lamp5	5	Lamp5 Plch2 Dock5	Core	0	0	14.15272717	0	0	0	81.51970852	0	0	0	0	0	0	0	11.32218174	0	0	0.566109087	0	0	0	0	103.0318538	0	0	0.566109087	712.7313405	0	0
F2S4_170320_005_F01	VISp	L1-L6	GABAergic	Lamp5	5	Lamp5 Plch2 Dock5	Core	0	0	0	0	0	0	94.34016204	0	0	0	0	0	0	0	0	0	0	0	0	0	0	0	0	0	0	0	1.905861859	0	0
F2S4_170707_004_C01	VISp	L1	GABAergic	Lamp5	5	Lamp5 Plch2 Dock5	Core	0	0	65.79591121	0	0	93.35146376	0	0	0	0	0	0	0	0	0	0	0	0	0.562358215	0	0	0	170.9568975	0	0	0	0	0	0
F2S4_170707_004_E01	VISp	L1	GABAergic	Lamp5	5	Lamp5 Plch2 Dock5	Intermediate	0	0	0	80.13045238	0	0	96.15654285	0	0	0	0	0	0	0	29.76273945	0	0	0	0	0	0	0	150.5307784	0	0	0	60.67019966	0	0
F2S4_170707_005_E01	VISp	L2/3	GABAergic	Lamp5	5	Lamp5 Plch2 Dock5	Core	0	0	0	0	0	39.78278599	62.43687245	0	0	0	0	0	0	0	83.98588153	0	0	38.12516991	0	0	0	0	0	0	0	0	0	0	0
F2S4_170707_006_G01	VISp	L2/3	GABAergic	Lamp5	5	Lamp5 Plch2 Dock5	Core	0	0	0	0	0	0	242.7052616	0	0	0	0	0	0	0	0	0	0	0	0	0	0	0	87.21441639	0	0	0	0	0	0
F2S4_170707_022_B01	VISp	L1	GABAergic	Lamp5	5	Lamp5 Plch2 Dock5	Core	0	0	86.03024268	0	30.52686031	18.31611618	155.9645045	0	0	0	0	0	0	0	0	0	0	0	0	0	0	0	59.38861914	0	0	0	0	0	0
F2S4_170707_022_E01	VISp	L1	GABAergic	Lamp5	5	Lamp5 Plch2 Dock5	Intermediate	0	0	35.27809302	0	0	12.55660938	0	0	0	0	0	0	0	0	5.9793378	0	0	0	0	0	0	0	66.37064958	0.59793378	0	0	0	0	0
F2S4_170807_006_F01	VISp	L1-L4	GABAergic	Lamp5	5	Lamp5 Plch2 Dock5	Intermediate	0	0	0	0	0	0	0	0	0	0	0	0	0	0	0	0	0	0	0	0	0	0	69.32168729	0	0	0	415.9301237	0	0
F2S4_170807_006_H01	VISp	L1-L4	GABAergic	Lamp5	5	Lamp5 Plch2 Dock5	Core	0	0	111.1228757	0	0	0	0	0	0	0	0	0	0	0	0	0	0	0	0	0	0	0	0	0	33.54652851	0	208.6174742	0	0
F2S4_170807_007_D01	VISp	L1-L4	GABAergic	Lamp5	5	Lamp5 Plch2 Dock5	Core	0	0	0	0	0	40.33783482	28.34550555	0	0	0	0	0	0	0	112.2918104	0	0	0	17.44338803	0	0	0	73.04418737	0	0	26.16508204	13.08254102	0	0
F2S4_170807_008_B01	VISp	L1-L4	GABAergic	Lamp5	5	Lamp5 Plch2 Dock5	Core	0	0	0	0	0	4.042514315	0	0	0	0	0	0	0	0	42.85065173	0	0	0	187.5726642	0	0	0	42.85065173	0	0	0	68.72274335	0	0
F2S4_170807_009_F01	VISp	L1-L4	GABAergic	Lamp5	5	Lamp5 Plch2 Dock5	Core	0	0	0	0	0	18.37305516	90.78450784	0	0	0	0	0	0	0	0	0	0	0	0	0	0	0	41.06918212	0	0	0	138.3382977	0	0
F2S4_170807_010_C01	VISp	L1-L4	GABAergic	Lamp5	5	Lamp5 Plch2 Dock5	Core	0	0	0	0	94.36067314	0	31.08351586	0	0	0	0	0	0	0	0	0	0	18.87213463	0	0	0	0	138.7656958	0	0	0	165.4087094	0	0
F2S4_170807_011_C01	VISp	L1-L4	GABAergic	Lamp5	5	Lamp5 Plch2 Dock5	Core	0	0	70.97966372	0	42.10658018	0	46.91876077	0	0	0	0	0	0	0	1.203045148	0	0	0	0	0	0	0	90.22838609	0	0	0	179.253727	0	0
F2S4_171003_007_B01	VISp	L1-L4	GABAergic	Lamp5	5	Lamp5 Plch2 Dock5	Intermediate	0	0	0	0	0	0	64.28770971	0	0	0	0	0	0	0	0	0	0	0	0	0	0	0	35.06602348	0	0	0	0	0	0
F2S4_171003_007_D01	VISp	L1-L4	GABAergic	Lamp5	5	Lamp5 Plch2 Dock5	Core	0	0	0	0	0	0	0	0	0	0	0	0	0	0	28.85380155	0	0	0	0	0	0	0	0	0	0	0	510.5868361	0	0
F2S4_171122_007_B01	VISp	L1-L4	GABAergic	Lamp5	5	Lamp5 Plch2 Dock5	Core	0	0	0	0	0	0	0	0	0	0	0	0	0	0	117.3078191	0	0	0	0	0	0	0	131.8316443	0	0	0	0	0	0
F2S4_171122_007_C01	VISp	L1-L4	GABAergic	Lamp5	5	Lamp5 Plch2 Dock5	Core	0	0	0	0	0	0	0	0	0	0	0	0	0	0	0	0	0	0	0	0	0	0	0	0	0	0	329.682655	0	0
F2S4_171122_007_D01	VISp	L1-L4	GABAergic	Lamp5	5	Lamp5 Plch2 Dock5	Core	0	0	0	0	0	11.96903719	0	0	0	0	0	0	0	0	0	0	0	0	0	0	0	0	38.08330015	0	0	0	78.34278887	0	0
F2S4_171122_007_F01	VISp	L1-L4	GABAergic	Lamp5	5	Lamp5 Plch2 Dock5	Intermediate	0	0	112.6172243	0	93.42110652	0	89.58188296	0	0	0	0	0	0	0	0	0	0	0	0	0	0	0	0	0	0	0	39.67197674	0	0
F2S4_171122_007_G01	VISp	L1-L4	GABAergic	Lamp5	5	Lamp5 Plch2 Dock5	Core	0	0	41.75213364	0	0	0	0	0	0	0	0	0	0	0	0	0	0	0	0	0	0	0	19.27021553	0	0	0	0	0	0
F2S4_171122_007_H01	VISp	L1-L4	GABAergic	Lamp5	5	Lamp5 Plch2 Dock5	Core	0	0	47.13484001	0	0	0	103.1074625	0	0	0	0	0	0	0	0	0	0	0	112.9272209	0	0	0	82.48597002	0	0	0	75.61213919	0	0
F2S4_171122_008_A01	VISp	L1-L4	GABAergic	Lamp5	5	Lamp5 Plch2 Dock5	Core	0	0	106.0879317	0	0	0	22.15022751	0	0	0	0	0	0	0	0	0	0	0	0	0	0	0	38.47144777	0	0	0	204.0152533	0	0
F2S4_171122_008_B01	VISp	L1-L4	GABAergic	Lamp5	5	Lamp5 Plch2 Dock5	Core	0	0	114.6138944	0	0	0	103.4016656	0	0	0	0	0	0	0	118.351304	0	0	0	0	0	0	0	0	0	0	0	0	0	0
F2S4_171122_008_D01	VISp	L1-L4	GABAergic	Lamp5	5	Lamp5 Plch2 Dock5	Core	0	0	0	0	0	0	0	0	0	0	0	0	0	0	0	0	0	0	65.95249536	0	0	0	4.037907879	0	0	0	0	0	0
F2S4_171122_008_E01	VISp	L1-L4	GABAergic	Lamp5	5	Lamp5 Plch2 Dock5	Core	0	0	0	0	0	52.33744118	21.70089025	0	0	0	0	0	0	0	0	0	0	0	0	0	0	0	11.4887066	0	0	0	335.7255374	0	0
F2S4_171122_008_H01	VISp	L1-L4	GABAergic	Lamp5	5	Lamp5 Plch2 Dock5	Core	0	0	46.48017272	0	1.162004318	49.96618567	60.42422454	0	0	0	0	0	0	0	0	0	0	0	0	0	0	0	49.96618567	0	0	0	333.4952393	0	0
F2S4_171122_009_A01	VISp	L1-L4	GABAergic	Lamp5	5	Lamp5 Plch2 Dock5	Intermediate	0	0	54.50560547	0	0	0	47.81193462	0	0	11.47486431	0	0	0	0	0	0	0	0	0	0	0	0	52.59312809	0	0	0	3.82495477	0	0
F2S4_171122_009_B01	VISp	L1-L4	GABAergic	Lamp5	5	Lamp5 Plch2 Dock5	Core	0	0	89.57435893	0	2.326606726	22.10276389	191.9450549	0	0	0	0	0	0	0	0	0	0	0	133.7798867	0	0	0	90.7376623	0	11.63303363	0	134.9431901	0	0
F2S4_171122_009_C01	VISp	L1-L4	GABAergic	Lamp5	5	Lamp5 Plch2 Dock5	Core	0	0	0	0	0	0	180.8564083	0	0	0	0	0	0	0	0	0	0	0	176.1281362	0	0	0	0	0	0	0	3.546204084	0	0
F2S4_171122_009_E01	VISp	L1-L4	GABAergic	Lamp5	5	Lamp5 Plch2 Dock5	Core	0	0	6.654976092	0	0	31.0565551	230.7058379	0	0	0	0	0	0	0	42.14818192	0	0	0	1.109162682	0	0	0	299.4739241	0	0	1.109162682	0	0	0
F2S4_171122_009_G01	VISp	L1-L4	GABAergic	Lamp5	5	Lamp5 Plch2 Dock5	Core	0	0	0	0	0	15.74251542	0	0	0	0	0	0	0	0	0	0	0	0	0	0	0	0	0	0	0	0.983907214	0	0	0
F2S4_171122_009_H01	VISp	L1-L4	GABAergic	Lamp5	5	Lamp5 Plch2 Dock5	Core	0	0	0	0	0	0	350.5490764	0	0	0	0	0	0	0	6.026631685	0	0	0	0	0	0	0	35.1553515	0	0	0	271.1984258	0	0
F2S4_171122_010_D01	VISp	L1-L4	GABAergic	Lamp5	5	Lamp5 Plch2 Dock5	Core	0	0	0	0	0	0	144.0254205	0	0	0	0	0	0	0	40.50714951	0	0	0	110.2694626	0	0	0	3.375595793	0	0	0	14.62758177	0	0
F2S4_171122_010_E01	VISp	L1-L4	GABAergic	Lamp5	5	Lamp5 Plch2 Dock5	Core	0	0	0	0	0	0	50.74704728	0	0	0	0	0	0	0	0	0	0	0	0	0	0	0	109.6136221	0	0	0	172.5399608	0	0
F2S4_171122_010_F01	VISp	L1-L4	GABAergic	Lamp5	5	Lamp5 Plch2 Dock5	Core	0	0	0	0	0	0	0	0	0	0	0	0	0	0	198.4536336	0	0	0	148.3490033	0	0	0	28.49086819	0	0	0	31.43819938	0	0
F2S4_171122_010_H01	VISp	L1-L4	GABAergic	Lamp5	5	Lamp5 Plch2 Dock5	Core	0	0	0	0	0	0	0	0	0	0	0	0	0	0	0	0	0	0	0	0	0	0	117.5285235	0	0	0	0	0	0
F2S4_171122_011_D01	VISp	L1-L4	GABAergic	Lamp5	5	Lamp5 Plch2 Dock5	Core	0	0	0	0	0	0	62.99692636	0	0	0	0	0	0	0	179.846064	0	0	0	0	0	0	0	0	0	85.35067442	0	221.5053217	0	0
F2S4_171122_011_G01	VISp	L1-L4	GABAergic	Lamp5	5	Lamp5 Plch2 Dock5	Core	0	0	0	0	0	28.82665346	120.3936703	0	0	0	0	0	0	0	82.24074664	0	0	0	0	0	0	0	151.7638521	0	0	0	0	0	0
F2S4_171122_011_H01	VISp	L1-L4	GABAergic	Lamp5	5	Lamp5 Plch2 Dock5	Core	0	0	0	0	0	0	0	0	0	0	0	0	0	0	147.7686927	0	0	0	1.470335251	7.351676256	0	0	124.9784963	0	0	0	302.8890617	0	0
F2S4_171122_012_A01	VISp	L1-L4	GABAergic	Lamp5	5	Lamp5 Plch2 Dock5	Core	0	0	0	0	0	1.254410822	115.4057956	0	0	0	0	0	0	0	0	0	0	0	0	0	0	0	5.017643288	0	0	148.020477	0	0	0
F2S4_171122_012_B01	VISp	L1-L4	GABAergic	Lamp5	5	Lamp5 Plch2 Dock5	Core	0	0	0	0	0	0	60.25175721	0	0	0	0	0	0	0	0	0	0	0	0	0	0	0	0	0	0	0	0	0	0
F2S4_171122_012_C01	VISp	L1-L4	GABAergic	Lamp5	5	Lamp5 Plch2 Dock5	Core	0	0	0	0	0	0	24.5742511	0	0	0	0	0	0	0	0	0	0	0	0	0	0	0	17.20197577	0	0	0	34.40395154	0	0
F2S4_171122_012_F01	VISp	L1-L4	GABAergic	Lamp5	5	Lamp5 Plch2 Dock5	Core	0	0	0	0	0	101.3795958	0	0	0	0	0	0	0	0	74.99312563	0	0	0	0	0	0	0	8.332569514	0	0	61.10550977	131.9323506	0	0
F2S4_171122_012_G01	VISp	L1-L4	GABAergic	Lamp5	5	Lamp5 Plch2 Dock5	Core	0	0	0	0	0	174.2970021	99.75488799	0	0	0	0	0	0	0	0	0	0	0	0	0	0	0	0	0	0	0	0	0	0
F2S4_171122_013_A01	VISp	L1-L4	GABAergic	Lamp5	5	Lamp5 Plch2 Dock5	Core	0	0	0	0	0	42.92049092	0	0	0	0	0	0	0	0	39.53203111	0	0	0	0	0	0	0	2.258973206	0	0	0	86.97046844	0	0
F2S4_171122_013_B01	VISp	L1-L4	GABAergic	Lamp5	5	Lamp5 Plch2 Dock5	Core	0	0	0	0	1.510349291	0	138.9521348	0	0	0	0	0	0	0	0	0	0	0	0	0	0	0	17.36901685	0	0	0	356.4424327	0	0
F2S4_171122_013_D01	VISp	L1-L4	GABAergic	Lamp5	5	Lamp5 Plch2 Dock5	Core	0	0	0	0	0	0	0	0	0	0	0	0	0	0	199.5313709	0	0	0	0	0	0	0	0	0	0	0	39.09736322	0	0
F2S4_171122_013_G01	VISp	L1-L4	GABAergic	Lamp5	5	Lamp5 Plch2 Dock5	Core	0	0	0	0	1.166475948	0	193.6350073	0	0	0	0	0	0	0	71.15503282	0	0	0	0	0	0	0	65.32265308	0	0	0	0	0	0
FYS4_171003_504_B01	VISp	L1-L4	GABAergic	Lamp5	5	Lamp5 Plch2 Dock5	Core	0	0	0	0	0	0	0	0	0	0	0	0	0	0	0	0	0	0	0	0	0	0	7.208476344	0	0	0	28.83390538	0	0
FYS4_171003_504_C01	VISp	L1-L4	GABAergic	Lamp5	5	Lamp5 Plch2 Dock5	Core	0	0	0	0	0	0	0	0	0	0	0	0	0	0	294.3432578	0	0	0	0	79.28437919	0	0	0	0	0	0	0	0	0
FYS4_171003_504_G01	VISp	L1-L4	GABAergic	Lamp5	5	Lamp5 Plch2 Dock5	Core	0	0	67.01197543	0	0	95.59061202	0	0	0	0	0	0	0	0	0	0	0	0	0	0	0	0	0	0	0	0	8.869232043	0	0
F1S4_180124_316_B01	ALM	L1-L2/3	GABAergic	Lamp5	6	Lamp5 Lsp1	Core	0	0	0	0	0	68.08618804	0	0	0	0	0	0	0	0	53.56113459	0	0	0	0	0	0	0	42.6673445	0	9.985974245	0	0	0	0
F1S4_180124_317_B01	ALM	L5-L6	GABAergic	Lamp5	6	Lamp5 Lsp1	Core	0	0	0	0	0	14.73411424	0	0	0	0	0	0	0	0	0	0	0	0	0	48.53590574	0	0	0	0	0	0	0	0	0
F1S4_180124_317_D01	ALM	L5-L6	GABAergic	Lamp5	6	Lamp5 Lsp1	Core	0	0	0	0	0	12.9209111	0	0	0	0	0	0	0	0	91.44029396	0	0	0	0	0	0	0	48.7018957	0	0	0	0	0	0
F2S4_160209_007_F01	ALM	L2/3	GABAergic	Lamp5	6	Lamp5 Lsp1	Core	0	0	0	0	0	25.34922072	0	0	0	0	0	0	0	0	117.8269334	0	0	0	46.94300134	0	0	0	121.5823735	0	3.755440107	0	0	0	0
F2S4_160209_007_G01	ALM	L2/3	GABAergic	Lamp5	6	Lamp5 Lsp1	Core	0	0	0	0	0	0	20.93891357	0	0	0	0	0	0	0	154.8210579	0	0	0	0	50.76100261	0	0	78.04504151	0	0	0	0	0	0
F2S4_160209_008_F01	ALM	L2/3	GABAergic	Lamp5	6	Lamp5 Lsp1	Core	0	0	0.712400905	0.712400905	0	0	0	0	61.26647783	0	0	0	0	0	30.63323892	0	0	0	0	0	0	0	151.0289919	0.712400905	0	0	0	0	0
F2S4_160209_011_F01	ALM	L2/3	GABAergic	Lamp5	6	Lamp5 Lsp1	Core	0	0	0	0	0	3.219896384	0	0	0	0	0	0	0	0	34.34556143	0	0	0	90.15709874	0	0	0	0	0	0	0	0	0	0
F2S4_160216_006_B01	ALM	L2/3	GABAergic	Lamp5	6	Lamp5 Lsp1	Core	0	0	0	0	0	30.10938563	1.771140331	0	0	0	0	0	0	0	217.8502607	0	0	0	0	156.7459193	9.74127182	0	94.75600771	0	0	0	0	0	0
F2S4_160225_002_B01	ALM	L6	GABAergic	Lamp5	6	Lamp5 Lsp1	Core	0	0	0	0	0	10.22669325	0	0	0	0	0	0	0	0	0.929699386	0	0	0	0	54.3874141	0	0	33.46917791	0	0	0	0	0	0
F2S4_160307_007_A01	ALM	L5	GABAergic	Lamp5	6	Lamp5 Lsp1	Core	0	0	0.434274885	0	0	22.582294	23.88511866	0	0	0	0	0	0	0	230.5999638	0	0	0	65.14123271	18.67382004	0	0	40.82183916	0	0	0	218.440267	0	0
F2S4_160307_007_D01	ALM	L5	GABAergic	Lamp5	6	Lamp5 Lsp1	Core	0	0	0	0	0	31.2132391	46.81985864	0	0	0	0	0	0	0	87.78723496	0	0	0	8.291016635	14.14349897	0	0	0	0	0	0	0	0	0
F2S4_160307_007_H01	ALM	L5	GABAergic	Lamp5	6	Lamp5 Lsp1	Core	0	0	0	0	0	16.92491793	36.35723111	0	0	0	0	0	0	0	158.5927495	0	0	0	0	0	0	0	58.29693954	0	0	0	0	0	0
F2S4_160307_008_B01	ALM	L6	GABAergic	Lamp5	6	Lamp5 Lsp1	Core	0	0	0	0	0	0	0	0	0	0	0	0	0	0	93.66180853	0	0	0	0	0	0	0	1.937830521	0	0	0	0	0	0
F2S4_160307_009_D01	ALM	L2/3	GABAergic	Lamp5	6	Lamp5 Lsp1	Core	0.643865666	0	0	0	0	43.78286532	0	0	0	0	0	0	0	0	44.42673098	0	0	0	0	14.80891033	0	0	57.94790998	0	0	0	0	0	0
F2S4_160308_003_D01	ALM	L6	GABAergic	Lamp5	6	Lamp5 Lsp1	Core	0	0	0	0	0	0	0	0	0	0	0	0	0	0	0	0	0	0	0	97.59812158	0	0	72.63116024	0	0	0	0	0	0
F2S4_160308_003_E01	ALM	L6	GABAergic	Lamp5	6	Lamp5 Lsp1	Core	0	0	0	0	0	12.56864942	0	0	0	0	0	0	0	0	114.7572338	0	0	21.85852072	34.42717014	112.5713817	0	0	150.823793	0	0	0	0	0	0
F2S4_160308_003_G01	ALM	L6	GABAergic	Lamp5	6	Lamp5 Lsp1	Core	0	0	0	0	0	0	0	0	0	0	0	0	0	0	97.85232462	0	0	31.91974226	39.24558474	30.34991887	0	0	56.51364203	0	0	0	0	0	0
F2S4_160308_003_H01	ALM	L6	GABAergic	Lamp5	6	Lamp5 Lsp1	Core	0	0	0	0	0	0	20.00056002	0	0	34.00095203	0	0	0	0	159.5044661	0	0	0	43.50121803	56.50158204	0	0	30.00084002	0	0	16.50046201	0	0	0
F2S4_160420_001_B01	ALM	L2/3	GABAergic	Lamp5	6	Lamp5 Lsp1	Core	0	0	0	0	0	31.35261449	45.98383459	0	0	0	0	0	31.35261449	0	39.71331169	0	0	18.28902512	0	0	0	0	17.76648155	0	0	0	0	0	0
F2S4_160420_006_C01	ALM	L2/3	GABAergic	Lamp5	6	Lamp5 Lsp1	Core	0	0	0	0	0	0	0	0	0	0	0	0	0	0	82.29434149	0	0	0	42.07530242	0	0	0	0	0	0	0	0	0	0
F2S4_160420_007_A01	ALM	L2/3	GABAergic	Lamp5	6	Lamp5 Lsp1	Core	0	4.0625213	24.82651906	0	0	17.60425897	0	0	0	0	0	0	0	0	12.63895516	0	0	0	0	0	0	0	46.94469058	0	0	0	0	0	0
F2S4_160420_007_F01	ALM	L2/3	GABAergic	Lamp5	6	Lamp5 Lsp1	Core	0	0	0	0	0	0	0	0	4.636517326	0	0	0	0	0	98.52599319	0	0	10.43216398	0	23.18258663	0	0	108.9581572	0	0	0	0	0	0
F2S4_160420_008_C01	ALM	L5	GABAergic	Lamp5	6	Lamp5 Lsp1	Core	0	0	7.715428542	0	0	4.959918349	0	0	0	0	0	0	0	0	321.2924886	0	0	0	0	61.72342834	0	0	198.3967339	0	0	0	0	0	0
F2S4_160420_009_B01	ALM	L5	GABAergic	Lamp5	6	Lamp5 Lsp1	Core	0	0	0	0	0	7.657540645	29.45207941	0	0	0	0	0	0	0	134.8905237	0	0	0	149.6165634	229.7262194	87.76719663	0	18.26028923	0	0	0	0	0	0
F2S4_160420_009_G01	ALM	L5	GABAergic	Lamp5	6	Lamp5 Lsp1	Core	0	0	0.572774756	0	0	13.17381938	0	0	0	0	0	0	0	0	53.84082704	0	0	0	0	0	74.46071825	0	133.4565181	0	0	0	0	0	0
F2S4_160420_012_C01	ALM	L5	GABAergic	Lamp5	6	Lamp5 Lsp1	Core	0	0	72.23547834	0	0	0	0	0	0	0	0	0	0	0	93.20706882	0	0	0	9.903251063	130.4898964	0	0	96.70233391	0	0	0	0	0	0
F2S4_160420_013_C01	ALM	L5	GABAergic	Lamp5	6	Lamp5 Lsp1	Core	0	0	0	0	0	20.14370294	0	0	3.916831127	0	0	0	0	0	177.3764953	0	0	0	38.04921666	0	0	0	44.204237	0	0	0	0	38.04921666	0
F2S4_160420_016_C01	ALM	L6	GABAergic	Lamp5	6	Lamp5 Lsp1	Core	4.058983525	0	0	0	0	12.17695057	13.39464563	0	5.276678582	0	0	0	0	0	23.54210444	0	0	0	50.33139571	0	0	0	96.60380789	0	0	0	0	0	0
F2S4_160420_018_A01	ALM	L6	GABAergic	Lamp5	6	Lamp5 Lsp1	Core	0	0	0	0	0	9.046479749	0	0	12.23935495	94.18981856	0	0	0	0	250.1085578	0	0	0	39.91094007	132.504321	0	0	54.27887849	0	0	0	0	0	0
F2S4_160420_019_G01	ALM	L6	GABAergic	Lamp5	6	Lamp5 Lsp1	Core	0	0	0	0	0	9.19430321	0	0	0	0	0	0	0	0	0	0	0	0	0	85.96673501	0	0	53.32695862	0	0	0	0	0	0
F2S4_160420_025_H01	ALM	L5	GABAergic	Lamp5	6	Lamp5 Lsp1	Core	0	0	0	0	0	16.45150836	0	0	4.112877089	0	0	0	0	0	16.86279607	0	0	1.233863127	0	78.96724011	0	0	92.1284468	0	0	0	0	0	0
F2S4_160420_027_G01	ALM	L2/3	GABAergic	Lamp5	6	Lamp5 Lsp1	Core	0	0	0	0	0	0	0	0	0	0	0	0	0	0	14.66004537	0	0	0	0	0	0	0	113.0242208	0	0	0	0	0	0
F2S4_160420_031_D01	ALM	L2/3	GABAergic	Lamp5	6	Lamp5 Lsp1	Core	0	0	0	0	0	0	50.09129798	0	0	0	0	0	0	0	82.25518405	0	0	0	82.25518405	38.49120792	0	0	41.65486885	0	0	0	0	0	0
F2S4_160421_002_D01	ALM	L2/3	GABAergic	Lamp5	6	Lamp5 Lsp1	Core	0	0	0	0	0	3.291980571	0	0	14.81391257	37.30911313	0	0	0	0	140.4578377	0	0	0	2.194653714	0	0	0	67.4856017	0	0	0	0	0	0
F2S4_160421_005_D01	ALM	L5	GABAergic	Lamp5	6	Lamp5 Lsp1	Core	0	0	0	0	0	5.964118777	24.94086034	0.542192616	0	0	0	0	0	0	86.20862596	0	0	10.84385232	0	0	0	0	65.60530655	0	0	0	0	0	0
F2S4_160421_008_F01	ALM	L5	GABAergic	Lamp5	6	Lamp5 Lsp1	Core	0	0	0	0	0	0	0	0	0	0	0	0.489574031	0	0	28.88486785	0	0	0	0	47.48868105	0	0	60.7071799	0	0	0	0	0	0
F2S4_160421_009_C01	ALM	L5	GABAergic	Lamp5	6	Lamp5 Lsp1	Core	0	0	53.31601371	0	0	5.38545593	0	0	0	0	0	0	0	0	252.0393375	0	0	0	0	0	0	0	1.077091186	0	0	19.92618694	0	0	0
F2S4_160421_013_D01	ALM	L2/3	GABAergic	Lamp5	6	Lamp5 Lsp1	Core	0	0	0	0	0	20.7317621	0	0	0	0	0	0	0	0	102.3630753	0	0	0.43191171	12.5254396	2.159558552	0	0	139.9393941	0	0	0	0	0	0
F2S4_160421_016_E01	ALM	L5	GABAergic	Lamp5	6	Lamp5 Lsp1	Core	0	0	42.29779937	0	0	0	0	0.571591883	12.57502143	0	0	0	0	0	51.44326951	0	0	0	0.571591883	31.43755359	1.143183767	0	43.44098314	0	0	0	0	0	0
F2S4_160503_001_B01	ALM	L6	GABAergic	Lamp5	6	Lamp5 Lsp1	Core	0	0	0	0	0	46.13729612	0	0	10.82814093	0	0	0	0	0	0.470788736	0	0	0	0	0	0	0	19.77312691	0	0	13.18208461	0	0	0
F2S4_160503_002_A01	ALM	L1	GABAergic	Lamp5	6	Lamp5 Lsp1	Core	0	0	0	0	0	0	32.06408271	0	0	0	0	0	0	0	197.2549898	0	0	0	0	9.740987152	0	0	16.64085305	0	0	0	0	0	0
F2S4_160503_002_G01	ALM	L6	GABAergic	Lamp5	6	Lamp5 Lsp1	Core	0	0	0	0	0	7.210413168	34.38812434	0	0	0	0	0	0	0	63.22977701	0	0	0	0	0	0	0	191.3532725	0	0	0	0	0	0
F2S4_160503_003_A01	ALM	L1	GABAergic	Lamp5	6	Lamp5 Lsp1	Core	0	0	0	0	0	0	0	0	1.072338336	0	0	0	0	0	356.0163274	0	0	0	0	0	0	0	42.35736426	0	0	0	0	0	0
F2S4_160503_003_G01	ALM	L1	GABAergic	Lamp5	6	Lamp5 Lsp1	Core	0	0	0	0	0	6.41012629	0.534177191	0	1.602531573	0	0	0	0	0	218.4784711	0	0	0	0	47.54176999	0	0	0.534177191	0	0	0	0	0	0
F2S4_160503_004_F01	ALM	L5	GABAergic	Lamp5	6	Lamp5 Lsp1	Core	0	0	0	0	0	0	0	0	0	0	0	0	0	0	73.21066134	0	0	0	0	0	0	0	53.4801285	0	0	0	0	0	0
F2S4_160503_005_A01	ALM	L5	GABAergic	Lamp5	6	Lamp5 Lsp1	Core	0	0	0	0	0	0.550367425	0	0	0	0	0	0	0	0	136.4911215	0	0	27.51837126	0	0	51.18417055	0	33.57241294	0	0	0	0	0	0
F2S4_160503_005_C01	ALM	L5	GABAergic	Lamp5	6	Lamp5 Lsp1	Core	0	0	0	0	0	0	0	0	16.0916419	0	0	0	0	0	42.7434238	0	0	0	27.15464571	0	0	0	107.6128552	0	0	0	0	0	0
F2S4_160503_006_G01	ALM	L2/3	GABAergic	Lamp5	6	Lamp5 Lsp1	Core	0	0	0	0	0	0	0	0	0	0	0	0	0	0	167.375308	0	0	0	0	220.4204056	0	0	91.15516773	0	0	0	0	0	0
F2S4_160503_006_H01	ALM	L2/3	GABAergic	Lamp5	6	Lamp5 Lsp1	Core	0	0	0	0	0	0	0	0	38.97775953	0	0	0	0	0	155.9110381	0	0	0	0	0	0	0	61.51177676	0	0	0	0	0	0
F2S4_160503_007_E01	ALM	L2/3	GABAergic	Lamp5	6	Lamp5 Lsp1	Core	0	0	12.85206629	0	0	0	0	0	0	0	0	0	0	0	83.53843089	0	0	41.98341655	54.40708063	0	0	0	0.42840221	0	0	0	0	0	0
F2S4_160503_007_F01	ALM	L2/3	GABAergic	Lamp5	6	Lamp5 Lsp1	Core	0	1.590593021	0	0	0	0	0	0	0	16.96632556	0	0	0	0	31.28166274	0	0	22.79849996	0	68.92569757	0	0	82.71083708	0	14.31533719	0	0	0	0
F2S4_160503_008_A01	ALM	L2/3	GABAergic	Lamp5	6	Lamp5 Lsp1	Core	0	0	0	0	0	22.96294109	28.29362385	0	0	0	0	0	0	0	30.75393896	0	0	0	0	88.57134422	0	0	102.5131299	0	0	0	0	0	0
F2S4_160503_008_G01	ALM	L2/3	GABAergic	Lamp5	6	Lamp5 Lsp1	Core	0	0	0.461347606	0	0	23.99007549	0	0	0	0	0	0	0	0	16.1471662	0	0	0	0	0	0	0	70.58618365	0	22.14468507	0	0	0	0
F2S4_160503_009_A01	ALM	L2/3	GABAergic	Lamp5	6	Lamp5 Lsp1	Core	0	0	0	0	0	7.905950809	0	0	0	0.658829234	0	0	0	0	110.0244821	0	0	0	0	0	0	0	23.05902319	0	0	0	0	0	0
F2S4_160505_001_G01	ALM	L1	GABAergic	Lamp5	6	Lamp5 Lsp1	Core	0	0	0	0	5.117864418	0	46.06077976	0	0	0	0	0	0	0	13.89134628	0	0	0	0	0	57.75875557	0	9.504605347	0	0	0	12.4290993	0	0
F2S4_160505_002_E01	ALM	L1	GABAergic	Lamp5	6	Lamp5 Lsp1	Core	0	0	2.276792728	0	0	14.41968727	77.79041819	0	0	0	0	0	0	0	107.3887237	0	0	0	0.379465455	0	0	0	25.42418546	0	0	0	0	0	0
F2S4_160505_005_F01	ALM	L1	GABAergic	Lamp5	6	Lamp5 Lsp1	Core	0	0	0	0	0	0	0	0	0	0	0	0	0	0	245.6416597	0	0	0	0	23.98844333	0	0	23.02890559	0	0	16.31214146	0	0	0
F2S4_160505_006_C01	ALM	L1	GABAergic	Lamp5	6	Lamp5 Lsp1	Core	0	0	0	0	0	2.537687836	0	0	0	0	0	0	0	0	359.0828289	0	0	0	3.172109796	0	0	0	79.30274489	0	0	0	0	0	0
F2S4_160505_008_E01	ALM	L6	GABAergic	Lamp5	6	Lamp5 Lsp1	Core	0	0	0	0	0	0	0	0	30.72145908	0	0	0	0	0	60.52585967	0	0	0	0	144.8952398	0	0	38.51645616	0	0	6.419409359	0	0	0
F2S4_160505_009_D01	ALM	L6	GABAergic	Lamp5	6	Lamp5 Lsp1	Core	0	0	0	0	0	0	0	0	0	64.5632635	0	0	0	0	326.214384	0	0	0	32.28163175	70.79305209	0	0	249.1915433	0	0	0	0	0	0
F2S4_160505_009_F01	ALM	L6	GABAergic	Lamp5	6	Lamp5 Lsp1	Core	0	0	0	0	0	5.515278701	0	0	0	0	0	0	0	0	16.5458361	0	0	0	0.459606558	41.36459026	0	0	89.16367233	0	0	0.459606558	0	0	0
F2S4_160505_010_B01	ALM	L2/3	GABAergic	Lamp5	6	Lamp5 Lsp1	Core	0	0	0	0	0	23.8086953	0	0	21.51939768	0	0	0	0	0	228.9297625	0	0	0	0	0	0	0	135.0685599	0	0	0.457859525	0	0	0
F2S4_160505_011_D01	ALM	L2/3	GABAergic	Lamp5	6	Lamp5 Lsp1	Core	0	0	0	0	0	0	0	0	0	0	0	0	0	0	80.48494864	0	0	0	0	0	0	0	0	0	0	0	0	0	0
F2S4_160505_011_F01	ALM	L2/3	GABAergic	Lamp5	6	Lamp5 Lsp1	Core	0	0	0	0	0	0	0	0	0	0	0	0	0	0	83.12872083	0	0	0	0	15.49857507	0	0	15.02892128	0	0	0	0	0	0
F2S4_160505_012_D01	ALM	L2/3	GABAergic	Lamp5	6	Lamp5 Lsp1	Core	0	0	0	0	0	0	0	0	10.68934573	0	0	0	0	0	176.6287127	0	0	0	0	51.91967924	5.599181094	0	170.0114987	0	0	0	0	0	0
F2S4_160505_012_E01	ALM	L2/3	GABAergic	Lamp5	6	Lamp5 Lsp1	Core	0	0	0	0	0	36.73598339	36.73598339	0	0	0	0	0	0	0	96.49318303	0	0	0	18.61289825	0	0	0	71.02290121	0	0	0	0	0	0
F2S4_160505_012_G01	ALM	L2/3	GABAergic	Lamp5	6	Lamp5 Lsp1	Core	0	0	0	0	0	4.200435445	0	0	0	0	0	0	0	0	53.67223069	0	0	0	0	61.60638653	0	0	63.47324673	0	0	0	0	0	0
F2S4_160505_013_C01	ALM	L2/3	GABAergic	Lamp5	6	Lamp5 Lsp1	Core	0	0	0	0	0	5.504375061	0	0	0	0	32.56755244	0	0	0	115.1331784	0	0	0	2.293489609	0	0	0	169.718231	0	0	0	0	0	0
F2S4_160505_013_H01	ALM	L2/3	GABAergic	Lamp5	6	Lamp5 Lsp1	Core	0	0	56.54787773	0	0	37.17499369	0	0	8.377463367	0	0	0	0	0	48.17041436	0	0	0	0	0	0	0	30.36830471	0	0	0	48.69400582	0	0
F2S4_160505_015_C01	ALM	L2/3	GABAergic	Lamp5	6	Lamp5 Lsp1	Core	0	0	93.12890487	0	0	0	100.1785033	0	0	0	0	0	0	0	98.32334578	0	0	17.0674487	4.081346429	0	0	0	142.4760935	0	0	0	120.5852354	0	0
F2S4_160505_015_D01	ALM	L2/3	GABAergic	Lamp5	6	Lamp5 Lsp1	Core	0	0	0	0	0	0	55.00016844	0	0	0	0	0	0	0	246.1257538	0	0	0	0	0	0	0	106.5628263	0	0	0	0	0	0
F2S4_160505_015_E01	ALM	L2/3	GABAergic	Lamp5	6	Lamp5 Lsp1	Core	0	0	0	0	0	16.60316312	0	0	6.385831967	0	0	0	0	0	136.231082	0	0	0	0	2.554332787	0	0	60.02682049	0	0	80.88720492	0	0	0
F2S4_160505_016_E01	ALM	L5	GABAergic	Lamp5	6	Lamp5 Lsp1	Core	0	0	0	0	0	0	0	0	0	0	0	0	0	0	0	0	0	20.57034044	13.38704695	0	1.306053361	0	39.18160084	0	0	0	0	0	0
F2S4_160505_019_B01	ALM	L2/3	GABAergic	Lamp5	6	Lamp5 Lsp1	Core	0	0	0	0	0	8.565623971	0	0	0	0	0	0	0	0	79.426695	0	0	0	32.70510971	75.53322956	0	0	73.97584338	0	0	0	0	0	0
F2S4_160505_019_C01	ALM	L2/3	GABAergic	Lamp5	6	Lamp5 Lsp1	Core	5.210072285	0	0	0	0	27.3528795	0	0	15.19604417	0	0	0	0	0	129.8176344	0	0	0	0	217.9546906	0	0	42.98309635	0	0	0	0	0	0
F2S4_160505_020_A01	ALM	L2/3	GABAergic	Lamp5	6	Lamp5 Lsp1	Core	0	0	0	0	0	3.467347602	0	0	0	0	0	0	0	0	18.1072597	0	0	0	32.7471718	80.1342557	0	0	38.14082363	0	0	0	0	0	0
F2S4_160505_022_B01	ALM	L2/3	GABAergic	Lamp5	6	Lamp5 Lsp1	Core	0	0	0	0	0	0	0.742013982	0	0	0	0	0	0	0	20.03437751	0	0	0	0	0	0	0	35.24566413	0	0	0	0	0	0
F2S4_160505_023_C01	ALM	L2/3	GABAergic	Lamp5	6	Lamp5 Lsp1	Core	0	0	0	0	0	12.87495415	17.16660554	0	19.47749475	0	0	0	0	0	60.74337344	0	0	0	59.09273829	12.87495415	0	0	8.583302769	0	0	0	0	0	0
F2S4_160505_024_G01	ALM	L6	GABAergic	Lamp5	6	Lamp5 Lsp1	Core	0	0	0	0	0	11.83923113	0	0	0	0	0	0	0	0	62.48483099	0	0	0	0	0	9.866025945	0	51.30333491	0	0	0	0	0	0
F2S4_160505_029_D01	ALM	L5	GABAergic	Lamp5	6	Lamp5 Lsp1	Core	0	0	0	0	28.24107173	38.15021971	32.20473092	0	24.27741254	0	0	0	0	0	5.450031387	0	0	0	0	0	0	0	76.30043942	0	0	0	0	0	0
F2S4_160506_001_A01	ALM	L2/3	GABAergic	Lamp5	6	Lamp5 Lsp1	Core	0	0	0	0	0	0	12.49209412	0	6.477382138	0	0	0	0	0	154.0691609	0	0	12.49209412	23.13350764	54.59507802	0	0	47.65502573	0	6.940052291	0	0	0	0
F2S4_160506_001_G01	ALM	L2/3	GABAergic	Lamp5	6	Lamp5 Lsp1	Core	4.499219385	0	22.49609693	0	0	23.49592346	13.99757142	0	0	0	0	0	0	0	245.4574131	0	0	0	0	8.498525506	0	0	149.9739795	0	0	0	0	0	0
F2S4_160506_001_H01	ALM	L2/3	GABAergic	Lamp5	6	Lamp5 Lsp1	Core	0	0	0	0	0	35.10923911	0	0	0	0	0	0	0	0	208.4611072	0	0	0	0	0	0	0	195.8437244	0	0	0	0	0	0
F2S4_160506_004_C01	ALM	L2/3	GABAergic	Lamp5	6	Lamp5 Lsp1	Core	0	0	0	0	2.191446201	36.15886232	14.24440031	0	0	0	0	0	0	0	0.365241034	0	0	22.27970304	0	14.60964134	0	0	16.80108754	0	0	0	0	0	0
F2S4_160506_004_E01	ALM	L2/3	GABAergic	Lamp5	6	Lamp5 Lsp1	Core	0	0	0	0	0	0	0	0	25.13544578	0	0	0	0	0	150.8126747	0	0	0	0	69.31289593	0	0	9.521002188	0	0	0	0	0	0
F2S4_160506_005_B01	ALM	L2/3	GABAergic	Lamp5	6	Lamp5 Lsp1	Core	0	0	0	0	0	1.673273307	0.557757769	0	10.03963984	0	0	0	0	0	98.72312514	0	0	0	44.06286376	0	0	0	96.49209406	0	0	0	0	0	0
F2S4_160506_005_D01	ALM	L2/3	GABAergic	Lamp5	6	Lamp5 Lsp1	Core	0	0	0	0	0	0.709068741	0	0	0	0	0	0	0	0	273.3459997	0	0	0	0	94.30614256	0	0	36.51704016	0	0	0	0	0	0
F2S4_160506_005_G01	ALM	L2/3	GABAergic	Lamp5	6	Lamp5 Lsp1	Core	0	0	0	0	0	4.470394407	0	0	0	0	0	0	0	0	87.37589068	0	0	0	0	0	0	0	33.3247583	0	0	0	0	0	0
F2S4_160506_005_H01	ALM	L2/3	GABAergic	Lamp5	6	Lamp5 Lsp1	Core	0	0	0	0	0	57.53690746	21.04206901	0	0	1.643911642	0	0	0	0	68.3867243	0	0	0	0	0	0	0	81.2092351	0	0	0	0	0	0
F2S4_160506_006_E01	ALM	L2/3	GABAergic	Lamp5	6	Lamp5 Lsp1	Core	0	0	0	0	0	0	3.459986125	0	0	0	0	0	0	0	201.9766901	0	0	0	0	0	0	0	36.76235258	0	0	0	0	0	0
F2S4_160506_006_H01	ALM	L2/3	GABAergic	Lamp5	6	Lamp5 Lsp1	Core	0	0	0	0	0	9.062611196	0	0	0	0	0	0	0	0	149.7715745	0	0	0	0	124.9686386	0	0	84.90235752	0	0	0	0	0	0
F2S4_160506_007_C01	ALM	L5	GABAergic	Lamp5	6	Lamp5 Lsp1	Core	0	0	0	0	0	53.8514452	0	0	0	0	0	0	0	0	176.2872782	0	0	0	0	0	0	0	103.6386304	0	0	0	0	0	0
F2S4_160506_008_C01	ALM	L5	GABAergic	Lamp5	6	Lamp5 Lsp1	Core	0	0	0	0	0	22.6524403	22.6524403	0	0	0	0	0	0	0	214.2543312	0	0	0	0	74.09235683	0	0	112.3183498	0	0	0	0	0	0
F2S4_160506_008_F01	ALM	L5	GABAergic	Lamp5	6	Lamp5 Lsp1	Core	0	0	0.486075871	0	0	0	0	0	0	0	0	0	0	0	23.81771766	0	0	24.30379353	56.87087686	0	0	0	83.60504975	0	0	0	0	0	0
F2S4_160506_009_F01	ALM	L5	GABAergic	Lamp5	6	Lamp5 Lsp1	Core	0	0	0	0	0	34.172371	0	0	0	0	0	0	0	0	126.3583021	0	0	0	2.384118907	0	13.51000714	0	67.15268255	0	0	0	0	0	0
F2S4_160506_011_A01	ALM	L5	GABAergic	Lamp5	6	Lamp5 Lsp1	Core	0	0	0	0	0	0	0	0	0	0	0	0	0	0	19.19580252	0	0	0	0	0	0	0	85.31467786	0	0	0	0.355477824	0	0
F2S4_160506_011_D01	ALM	L5	GABAergic	Lamp5	6	Lamp5 Lsp1	Core	0	0	0	0	0	0	58.95513917	0	0	0	0	0	0	0	230.6940228	0	0	0	0	0.366180989	0	0	30.75920304	0	0	0	6.957438784	0	0
F2S4_160506_011_E01	ALM	L5	GABAergic	Lamp5	6	Lamp5 Lsp1	Core	0	0	61.33321186	0	0	0.717347507	30.1285953	0	0	0	0	0	0	0	109.0368211	0	0	34.43268034	0	0	0	0	10.76021261	0	0	0	10.0428651	0	0
F2S4_160506_012_A01	ALM	L6	GABAergic	Lamp5	6	Lamp5 Lsp1	Core	0	0	0	0	0	0	0	0	3.949749964	0	0	0	0	0	152.0653736	0	0	0	37.19347883	0	0	0	108.9472699	0	0	0	0	0	0
F2S4_160506_012_F01	ALM	L6	GABAergic	Lamp5	6	Lamp5 Lsp1	Core	0	0	0	0	0	9.954698465	0	0	11.48619054	0	0	0	0	0	88.44366713	0	0	9.571825447	0.382873018	60.49393682	40.96741291	0	70.06576227	0	0	12.25193657	0	0	0
F2S4_160506_012_H01	ALM	L6	GABAergic	Lamp5	6	Lamp5 Lsp1	Core	0	0	0	0	0	6.11861002	0	0	9.942741283	0.382413126	0	0	0	0	108.2229147	0	0	0	68.06953647	0.382413126	0	0	5.736196894	0	0	0	0	0	0
F2S4_160506_013_F01	ALM	L6	GABAergic	Lamp5	6	Lamp5 Lsp1	Core	0	0	0	0	0	11.58807717	0	0	9.053185291	0	0	0	0	0	18.8306254	0	0	11.58807717	35.85061375	0	0	0	13.76084164	0	0	0	0	0	0
F2S4_160506_015_F01	ALM	L6	GABAergic	Lamp5	6	Lamp5 Lsp1	Core	0	0	0	0	0	2.971984587	0	0	0	0	0	0	0	0	134.4823026	0	0	25.26186899	0	0	0	0	35.66381505	0	0	26.00486514	0	0	0
F2S4_160517_003_H01	ALM	L2/3	GABAergic	Lamp5	6	Lamp5 Lsp1	Core	0	0	0	0	0	0	0	0	0	0	26.86472536	0	0	0	210.2612505	0	0	0	36.17783015	0	0	0	17.19342423	0	0	0	0.716392676	0	0
F2S4_160517_004_B01	ALM	L2/3	GABAergic	Lamp5	6	Lamp5 Lsp1	Core	0.386102771	0	0	0	0.386102771	24.71057736	0	0	0	0	0	0	0	0	106.9504676	0	0	0	0	44.78792147	0	0	60.61813509	0	0	0	0	0	0
F2S4_160517_015_E01	ALM	L6	GABAergic	Lamp5	6	Lamp5 Lsp1	Core	0	0	0	0	0.448921086	5.387053026	52.523767	0	0	0	0	0	0	0	292.2476267	0	0	0	9.876263881	49.38131941	0	0	5.387053026	0	0	0	0	0	0
F2S4_160517_019_A01	ALM	L2/3	GABAergic	Lamp5	6	Lamp5 Lsp1	Core	0	0	0	0	0	7.534799694	0	0	0	3.10256458	0	0	0	0	123.6593597	0	0	0	0	232.24912	0	0	31.46886931	0	0	0	0	0	0
F2S4_160517_024_H01	ALM	L5	GABAergic	Lamp5	6	Lamp5 Lsp1	Core	0	0	0	0	0	29.31682695	0	0	0	0	0	0	0	0	39.93154015	0	0	0	37.90969002	0	105.136207	0	132.4311838	0	0	0	0	0	0
F2S4_160517_033_H01	ALM	L6	GABAergic	Lamp5	6	Lamp5 Lsp1	Core	0	0	0	0	0	3.061527965	0	0	0	0	0	0	0	0	63.41736499	0	0	23.61750144	0	41.11194696	2.624166827	0	0.874722276	0	0	0	0	0	0
F2S4_160518_001_F01	ALM	L2/3	GABAergic	Lamp5	6	Lamp5 Lsp1	Core	0	0	0	0	0	13.96422784	139.2931727	0	0	0	76.80325311	0	0	0	333.3959396	0	0	0	58.99886261	0	0	0	10.12406518	0	0	0	55.15869996	0	0
F2S4_160518_002_D01	ALM	L2/3	GABAergic	Lamp5	6	Lamp5 Lsp1	Core	0	0	2.68795166	0	0	13.88775024	0	0	0	0	0	0	0	0	139.3254944	0	0	0	0	0	0	0	43.00722656	0	0	0	0	0	0
F2S4_160518_002_H01	ALM	L2/3	GABAergic	Lamp5	6	Lamp5 Lsp1	Core	0	0	0	0	0	0	67.62647185	0	35.88343404	0	0	0	0	0	82.80792472	0	0	0	0	204.2595476	0	0	105.350082	0	0	0	0	0	0
F2S4_160518_004_H01	ALM	L2/3	GABAergic	Lamp5	6	Lamp5 Lsp1	Core	0	0	0	0	0	0	117.2700406	0	0	0	0	0	0	0	71.93143757	0	0	0	17.00197615	0	0	0	20.92550911	0	0	0.435948106	0	0	0
F2S4_160518_010_D01	ALM	L2/3	GABAergic	Lamp5	6	Lamp5 Lsp1	Core	0	0	0	0	0	0	0	0	0	0	0	0	0	0	67.18038815	0	0	0	0	0	0	0	4.169817195	0	0	0	0	0	0
F2S4_160518_022_B01	ALM	L6	GABAergic	Lamp5	6	Lamp5 Lsp1	Core	0	0	0	0	0	0	0	0	13.89495415	0	0	0	0	0	30.17190043	0	0	0	0	0	0	0	0.39699869	0	0	0	0	0	0
F2S4_160518_029_E01	ALM	L5	GABAergic	Lamp5	6	Lamp5 Lsp1	Core	0	0	0	0	0	0	0	0	0	0	0	0	0	0	83.1065639	0	0	0	0	13.17543086	0	0	69.93113304	0	0	0	0	0	0
F2S4_160518_033_D01	ALM	L5	GABAergic	Lamp5	6	Lamp5 Lsp1	Core	0	0	0	0	0	0	0	0	3.766802292	0	0	0	0	0	104.8426638	0	0	0	0	23.22861414	0	0	43.94602675	0	0	0	0	0	0
F2S4_160518_035_A01	ALM	L5	GABAergic	Lamp5	6	Lamp5 Lsp1	Core	0	0	23.74169041	0	0	1.05518624	3.693151841	0	21.63131793	0	0	0	0	0	26.37965601	0	0	0.52759312	0	0	0	0	113.960114	0	0	30.07280785	0	0	0
F2S4_160523_001_A01	ALM	L1	GABAergic	Lamp5	6	Lamp5 Lsp1	Core	7.347772523	0	0	0	0	50.03483194	0	0	0	0	0	0	0	0	235.4786147	0	0	0	0	0	0	0	77.67645238	0	0	0	0	0	0
F2S4_160523_001_F01	ALM	L1	GABAergic	Lamp5	6	Lamp5 Lsp1	Core	0	0	0	0	0	47.19355042	68.46933135	0	0	0	0	0	0	0	248.3463883	0	0	0	0	108.6998989	0	0	20.50211617	0	0	0	0	0	0
F2S4_160523_001_G01	ALM	L2/3	GABAergic	Lamp5	6	Lamp5 Lsp1	Core	0	0	0	0	0	0	0	0	25.42801392	0	0	0	0	0	16.2572548	0	0	0	0	32.93136229	0	0	80.45256863	0	0	0	0	0	0
F2S4_160523_003_F01	ALM	L2/3	GABAergic	Lamp5	6	Lamp5 Lsp1	Core	0	0	0	0	0	0	0	0	0	0	0	0	0	0	84.59556243	0	0	0	0	29.69476885	0	0	69.05760198	0	0	0	0	0	0
F2S4_160523_004_H01	ALM	L2/3	GABAergic	Lamp5	6	Lamp5 Lsp1	Core	0	0	0	0	0	0	13.37478832	0	0	0	0	0	0	0	291.84474	0	0	0	0	0	0	0	134.0908265	0	0	0	0	0	0
F2S4_160523_005_G01	ALM	L2/3	GABAergic	Lamp5	6	Lamp5 Lsp1	Core	0	0	0	0	0	0	35.28362092	0	0	0	0	0	0	0	216.9418673	0	0	0	0	64.97775735	0	0	59.73761562	0	0	0	0	0	0
F2S4_160523_006_G01	ALM	L2/3	GABAergic	Lamp5	6	Lamp5 Lsp1	Core	0	0	0	0	0	0	0	0	0	0	0	0	0	0	74.99200708	0	0	0	28.02192435	26.95442247	60.84760717	0	0	0	0	0	0	0	0
F2S4_160523_007_A01	ALM	L2/3	GABAergic	Lamp5	6	Lamp5 Lsp1	Core	0	0	0	0	0	0.40413609	0	0	0	0	0	0	0	0	44.85910603	0	0	22.63162106	0	0	0	0	0	0	0	0.40413609	0	0	0
F2S4_160523_008_B01	ALM	L5	GABAergic	Lamp5	6	Lamp5 Lsp1	Core	0	0	0	0	0	5.17285081	0	0	0	0	0	0	0	0	114.4493242	0	0	35.56334932	94.72783045	98.28416539	4.202941283	0	42.02941283	0	0	10.99230797	0	0	0
F2S4_160523_008_F01	ALM	L5	GABAergic	Lamp5	6	Lamp5 Lsp1	Core	0	0	0	0	0	37.57535476	0	0	0	0	0	0	0	0	114.5740325	0	0	0	35.11139707	0	0	0	59.13498453	0	0	0.307994711	0	0	0
F2S4_160523_009_B01	ALM	L6	GABAergic	Lamp5	6	Lamp5 Lsp1	Core	0	0	0	0	0	5.754424193	0	0	0	0	0	0	0	0	187.977857	0	0	0	0	0	0	0	3.516592562	0	0	0	0.319690233	0	0
F2S4_160523_011_E01	ALM	L5	GABAergic	Lamp5	6	Lamp5 Lsp1	Core	0	0	0	0	0	8.983104733	0	0	0	0	0	0	0	0	86.70648916	0	0	0	76.55167511	28.90216305	0	0	6.249116336	0	0	0	0	0	0
F2S4_160523_012_B01	ALM	L6	GABAergic	Lamp5	6	Lamp5 Lsp1	Core	0	0	0	0	0	0	0	0	0	0	0	0	0	0	176.6058901	0	0	0	1.702225447	48.08786888	0	0	0	0	0	0	0	0	0
F2S4_160523_012_E01	ALM	L6	GABAergic	Lamp5	6	Lamp5 Lsp1	Core	0	0	0	0	0	0	0	0	0	0	0	0	0	0	0	0	0	0	0	0	0	0	881.4440725	0	0	0	0	0	0
F2S4_160524_004_C01	ALM	L2/3	GABAergic	Lamp5	6	Lamp5 Lsp1	Core	0	0	94.61491033	0	0	9.077445272	0	0	0	0	0	0	0	0	245.0910223	0	0	0	83.44267	0	0	0	0.34913251	0	0	0	0	0	0
F2S4_160524_004_G01	ALM	L2/3	GABAergic	Lamp5	6	Lamp5 Lsp1	Core	0	0	0	0	0	6.995448062	44.7708676	0	0	0	0	0	0	0	172.7875671	0	0	27.28224744	0	36.37632992	0	0	27.28224744	0	0	0	0	0	0
F2S4_160524_007_A01	ALM	L2/3	GABAergic	Lamp5	6	Lamp5 Lsp1	Core	0	0	0	0	0	8.308370457	50.60552915	0	29.4569498	0	0	0	0	0	74.0200277	0	0	0	0	14.3508217	0	0	232.6343728	0	25.68041778	0	0	0	0
F2S4_160524_008_B01	ALM	L2/3	GABAergic	Lamp5	6	Lamp5 Lsp1	Core	0	0	0	0	0	33.63876868	0	0	1.401615362	0	0	0	0	0	16.11857666	0	0	0	0	0	0	0	65.17511432	0	0	0	0	0	0
F2S4_160524_009_F01	ALM	L6	GABAergic	Lamp5	6	Lamp5 Lsp1	Core	0	0	0	0	0	0	0	0	0	0	0	0	0	0	89.27709505	0	0	0	0	71.85717407	232.9914432	0	3.629150205	0	0	0	0	0	0
F2S4_160524_011_A01	ALM	L2/3	GABAergic	Lamp5	6	Lamp5 Lsp1	Core	0	0	0	0	0	0.492883016	0	0	0	0	0	0	0	0	55.69578077	0	0	0	0	10.35054333	0	0	37.45910919	0	0	0	0	0	0
F2S4_160524_011_G01	ALM	L2/3	GABAergic	Lamp5	6	Lamp5 Lsp1	Core	0	0	0	0	0	35.28908193	0	0	0	0	0	0	0	0	87.59995632	0	0	0	0	0	0	0	146.9686471	0	0	0	0	0	0
F2S4_160524_012_F01	ALM	L2/3	GABAergic	Lamp5	6	Lamp5 Lsp1	Core	0	0	0	0	0	0	0	0	0	0	0	0	0	0	28.4018921	0	0	0	15.53228474	0	3.106456948	0	7.544252589	0	0	0	0	0	0
F2S4_160524_013_D01	ALM	L2/3	GABAergic	Lamp5	6	Lamp5 Lsp1	Core	0	0	16.15202108	0	0	0	0	0	0.87308222	0	0	0	0	0	302.5229893	0	0	0	0	42.7810288	0	0	1.309623331	0	0	0	0	0	0
F2S4_160524_014_B01	ALM	L2/3	GABAergic	Lamp5	6	Lamp5 Lsp1	Core	0	0	0	0	0	51.45649913	0	0	0	0	0	0	0	0	93.74253308	0	0	0	0	0	0	0	48.3996774	0	0	0	0	0	0
F2S4_160524_016_A01	ALM	L2/3	GABAergic	Lamp5	6	Lamp5 Lsp1	Core	0	0	0	0	0	5.509503588	0	0	0	0	0	0	0	0	32.44485446	0	0	0	0	0	0	0	1.836501196	0	0	0	0	0	0
F2S4_160524_017_A01	ALM	L5	GABAergic	Lamp5	6	Lamp5 Lsp1	Core	0	0	0	0	0	0	0	0	0	0	0	0	0	0	36.11005188	0	0	61.3870882	0	53.44287679	0	0	5.777608301	0	0	0	0	0	0
F2S4_160524_017_F01	ALM	L5	GABAergic	Lamp5	6	Lamp5 Lsp1	Core	0	0	0	0	0	54.30707412	0	0	0	0	0	0	0	0	81.7097262	0	0	0	0	0	28.39911215	0	25.40973193	0	0	0	0	0	0
F2S4_160524_018_B01	ALM	L5	GABAergic	Lamp5	6	Lamp5 Lsp1	Core	0	0	0	0	0	0	0	0	48.22883945	0	0	0	0	0	124.9301263	0	0	0	0	0	0	0	104.0115935	0	0	0	0	0	0
F2S4_160524_018_F01	ALM	L5	GABAergic	Lamp5	6	Lamp5 Lsp1	Core	0	0	0	0	0	22.08557387	46.93184447	0	0	0	0	0	0	0	172.2674762	0	0	0	0	0	0	0	269.9961405	0	0	0	0	0	0
F2S4_160524_019_A01	ALM	L5	GABAergic	Lamp5	6	Lamp5 Lsp1	Core	0	0	0	0	0	38.98829334	0	0	0	0	0	0	0	0	141.8269801	0	0	0	0	0	0	0	0.56504773	0	1.695143189	0	0	0	0
F2S4_160524_019_E01	ALM	L5	GABAergic	Lamp5	6	Lamp5 Lsp1	Core	0	0	0	0	0	6.25983078	0.569075525	0	0.569075525	0	0	0	0	0	196.9001318	0	0	23.33209654	50.64772176	0	0	0	7.397981831	0	0	0.569075525	0	0	0
F2S4_160524_019_H01	ALM	L5	GABAergic	Lamp5	6	Lamp5 Lsp1	Core	0	0	0	0	0	0.562256719	0	0	18.55447171	0	0	0	0	0	175.4240962	0	0	7.309337341	0	0	0	0	15.74318812	0	0	0	0	0	0
F2S4_160525_001_D01	ALM	L1	GABAergic	Lamp5	6	Lamp5 Lsp1	Core	0	0	0	0	5.006216052	0	0	0	0	0	0	0	0	0	52.56526854	0	0	0	0	0	0	0	77.5963488	0	0	0	5.840585394	0	0
F2S4_160525_002_F01	ALM	L1	GABAergic	Lamp5	6	Lamp5 Lsp1	Core	0	0	0	0	0	0.886026825	18.60656333	0	0	0	0	0	0	0	354.4107301	0	0	0	0	141.7642921	0	0	74.42625333	0	0	0	0	0	0
F2S4_160525_002_G01	ALM	L1	GABAergic	Lamp5	6	Lamp5 Lsp1	Core	0	0	0	0	0	109.1908462	0	0	0	0	0	0	0	0	171.0054988	0	0	0	0.451201844	30.23052353	72.19229501	0	19.40167928	0	0	0	0	0	0
F2S4_160525_003_B01	ALM	L2/3	GABAergic	Lamp5	6	Lamp5 Lsp1	Core	0	0	0	0	0	0	0	0	0	0	0	0	0	0	65.34687545	0	0	0	0	0	0	0	93.16782242	0	0	21.35095931	0	0	0
F2S4_160525_003_D01	ALM	L2/3	GABAergic	Lamp5	6	Lamp5 Lsp1	Core	0	0	169.9359319	0	0	4.078462365	0	0	0	0	0	0	0	0	161.3258447	0	0	0	84.7413847	0	0	0	17.67333692	0	0	0.90632497	147.7309701	0	0
F2S4_160525_003_E01	ALM	L2/3	GABAergic	Lamp5	6	Lamp5 Lsp1	Core	0	0	0	0	0	0	0	0	0	0	0	0	0	0	96.25678665	0	0	0	0	0	0	0	299.7921294	0	0	0	0	0	0
F2S4_160525_003_F01	ALM	L2/3	GABAergic	Lamp5	6	Lamp5 Lsp1	Core	2.063306366	0	0	0	0	0	36.4517458	0	0	0	0	0	0	0	111.4185438	0	0	0	0	0	0	0	61.21142219	0	0	0	0	0	0
F2S4_160525_004_B01	ALM	L2/3	GABAergic	Lamp5	6	Lamp5 Lsp1	Core	0	0	0	0	0	45.06710492	12.01789465	0	22.53355246	0	0	0	0	0	15.02236831	0	0	12.01789465	27.79138137	61.59171006	0	0	316.9719713	0	1.502236831	0	0	0	0
F2S4_160525_004_D01	ALM	L2/3	GABAergic	Lamp5	6	Lamp5 Lsp1	Core	0	0	38.33218337	0	4.999850004	17.49947502	12.49962501	0	0	0	0	0	0	0	16.66616668	0	0	0	0	0	0	0	79.16429174	0	0	0	46.66526671	0	0
F2S4_160525_004_H01	ALM	L2/3	GABAergic	Lamp5	6	Lamp5 Lsp1	Core	0	0	0	0	0	11.82217556	0	0	7.093305338	0	0	0	0	0	31.5258015	0	0	0	0	41.77168699	0	0	8.669595414	0	0	0	0	0	0
F2S4_160525_005_C01	ALM	L2/3	GABAergic	Lamp5	6	Lamp5 Lsp1	Core	0	0	0	0	0	0	69.06852461	0	0	0	0	0	0	0	188.4148723	0	0	0	0	65.51352702	0	0	50.78567986	0	0	0	0	0	0
F2S4_160525_006_C01	ALM	L2/3	GABAergic	Lamp5	6	Lamp5 Lsp1	Core	33.09836939	0	0	0	0	0	0	0	0	0	0	0	0	0	141.7023939	0	0	0	0	116.3614549	0.517162022	0	76.53997921	0	0	0	0	0	0.517162022
F2S4_160525_007_A01	ALM	L2/3	GABAergic	Lamp5	6	Lamp5 Lsp1	Core	0	0	0	0	0	0	0	0	0	0	0	0	0	0	135.0878503	0	0	62.97328358	4.062792489	29.45524555	0	0	53.32415142	0	0	0	0	0	0
F2S4_160525_009_B01	ALM	L2/3	GABAergic	Lamp5	6	Lamp5 Lsp1	Core	48.22086534	0	0	0	0	13.7773901	0	0	0	0	0	0	0	0	55.10956039	0	0	0	0	18.0828245	0	0	32.72130148	0	0	0	0	0	0
F2S4_160525_009_C01	ALM	L2/3	GABAergic	Lamp5	6	Lamp5 Lsp1	Core	0	0	1.198018717	0	0	74.87616979	0	0	0	0	0	0	0	0	91.04942247	0	0	0	0	4.792074867	0	0	0	0	0	0	0	0	0
F2S4_160525_009_H01	ALM	L2/3	GABAergic	Lamp5	6	Lamp5 Lsp1	Core	0	0	0	0	0	20.91988938	0	0	0	0	0	0	0	0	158.3934481	0	0	0	0	0	0	0	234.302761	0	0	0	0	0	0
F2S4_160525_011_C01	ALM	L5	GABAergic	Lamp5	6	Lamp5 Lsp1	Core	0	0	4.579838026	0	0	24.42580281	0	0	0	0	0	0	0	0	70.98748941	0	0	0	0	0	0	0	154.1878802	0	0	0	131.2886901	0	0
F2S4_160525_013_A01	ALM	L5	GABAergic	Lamp5	6	Lamp5 Lsp1	Core	0	0	0	0	0	5.180705154	0	0	4.748979725	0	0	0	0	0	100.5920251	0	0	0	0	40.15046495	0	0	96.27477079	0	0	0	0	0	0
F2S4_160525_017_B01	ALM	L2/3	GABAergic	Lamp5	6	Lamp5 Lsp1	Core	0	0	0	0	0	0	0	0	0	0	0	0	0	0	164.2690029	0	0	0	68.26763758	0	0	0	100.9792139	0	0	0	0	0	0
F2S4_160525_019_D01	ALM	L2/3	GABAergic	Lamp5	6	Lamp5 Lsp1	Core	0	0	0	0	0	54.83198473	0	0	0	0	0	0	0	0	29.09452251	0	0	0	0	0	0	0	208.1377379	0	0	0	0	0	0
F2S4_160525_021_C01	ALM	L2/3	GABAergic	Lamp5	6	Lamp5 Lsp1	Core	0	0	0	0	0	0	0	0	0	0	0	0	0	0	120.6710704	0	0	48.15239828	73.09882148	36.54941074	0	0	53.95389205	0	0	0	0	0	0
F2S4_160525_022_F01	ALM	L1	GABAergic	Lamp5	6	Lamp5 Lsp1	Intermediate	0	0	0	0	0	3.423745317	89.70212731	0	0	0	0	0	0	0	0	0	0	0	17.11872659	139.6888089	0	0	55.46467414	0	0	0	0	0	0
F2S4_160526_001_E01	ALM	L6	GABAergic	Lamp5	6	Lamp5 Lsp1	Core	0	0	0	0.479331007	0	0	0	0	0	0	0	0	0	0	29.23919145	0	0	0	31.15651547	8.627958131	195.08772	0	64.70968599	0	0	0	0	0	0
F2S4_160526_002_A01	ALM	L6	GABAergic	Lamp5	6	Lamp5 Lsp1	Core	0	0	0	0	0	0	0	0	0	0	0	0	0	0	91.6477042	0	0	0	4.557068165	358.4893623	0	0	106.3315905	0	0	0.506340907	0.506340907	0	0
F2S4_160526_003_C01	ALM	L6	GABAergic	Lamp5	6	Lamp5 Lsp1	Core	0	0	8.194681037	0	0	29.70571876	0	0	16.38936207	0	0	0	0	0	9.219016167	0	0	0	0	0	0	0	116.7742048	0	0	0	0	0	0
F2S4_160526_003_D01	ALM	L6	GABAergic	Lamp5	6	Lamp5 Lsp1	Core	0	0	0	0	0	19.15865541	0	0	0	0	0	0	0	0	222.654644	0	0	12.94503744	0	23.81886889	0	0	0	0	0	0	0	0	0
F2S4_160526_005_F01	ALM	L6	GABAergic	Lamp5	6	Lamp5 Lsp1	Core	0	0	0.560161013	0	0	1.120322025	0	0	0	0	0	0	0	0	7.842254178	0	0	0	0	271.1179301	92.98672811	0	96.90785519	0	0	0	0	0	0
F2S4_160526_006_F01	ALM	L6	GABAergic	Lamp5	6	Lamp5 Lsp1	Core	0	0	0	0	0	0	0	0	0	0	0	0	0	0	119.4879154	0	0	0	0	73.2708915	0	0	23.67213418	0	0	15.78142279	0	0	0
F2S4_160526_007_C01	ALM	L1	GABAergic	Lamp5	6	Lamp5 Lsp1	Core	0	0	0	0	0	10.76000766	0	0	0	0	0	0	0.566316192	0.566316192	43.60634682	0	0	0.566316192	0	0	0	0	11.89264004	0	0	0	0	0	0
F2S4_160526_008_B01	ALM	L1	GABAergic	Lamp5	6	Lamp5 Lsp1	Core	0	0	0	0	0	0	0	0	0	0	0	0	0	0	39.07530462	0	0	20.26126906	15.91956855	185.2458886	0	0	99.13549507	0	0	0	0	0	0
F2S4_160526_010_A01	ALM	L6	GABAergic	Lamp5	6	Lamp5 Lsp1	Core	0	0	0	0	0	12.65811912	0	0	0	0	0	0	0	0	24.86416256	0	0	28.93284371	62.83851992	55.605309	56.05738468	0	29.83699507	0	0	0	0	0	0.452075683
F2S4_160526_011_F01	ALM	L6	GABAergic	Lamp5	6	Lamp5 Lsp1	Core	0	0	14.20610373	0	0	0	0	0	0	0	0	0	0	0	97.86427015	0	0	0	29.99066343	70.63590466	48.53752108	0	174.8139987	0	0	0	0	0	0
F2S4_160526_012_C01	ALM	L6	GABAergic	Lamp5	6	Lamp5 Lsp1	Core	0	0	0	0	0	23.70735639	22.05335478	0	0	0	0	0	0	0	44.10670957	0	0	0	38.042037	20.39935318	0	0	116.3314465	0	0	0	0	0	0
F2S4_160526_012_G01	ALM	L5	GABAergic	Lamp5	6	Lamp5 Lsp1	Core	0	0	0	0	0	0	0	0	0	0	0	0	0	0	72.17282238	0	0	0	0	0	0	0	145.7470588	0	0	0	0	0	0
F2S4_160526_013_A01	ALM	L5	GABAergic	Lamp5	6	Lamp5 Lsp1	Core	0	0	0	0	0	0	0	0	0	0	0	0	0	0	34.51779039	0	0	22.75036185	69.82007602	129.441714	47.06971417	0	48.63870464	0	0	0	0	0	0
F2S4_160526_013_D01	ALM	L5	GABAergic	Lamp5	6	Lamp5 Lsp1	Core	1.367241843	0	75.19830134	0	0	0.683620921	0	0	0	0	0	0	0	0	31.44656238	0	0	0	27.34483685	0	0	0	128.5207332	0	0	0	88.87071976	0	0
F2S4_160526_013_E01	ALM	L5	GABAergic	Lamp5	6	Lamp5 Lsp1	Core	0	0	0	0	0	0	0	0	26.12227839	0	0	0	0	0	116.8246339	0	0	0	0	0	0	0	34.82970451	0	0	0	0	0	0
F2S4_160526_013_G01	ALM	L5	GABAergic	Lamp5	6	Lamp5 Lsp1	Core	0	0	0	0	0	0	0	0	0	0	0	0	0	0	147.0039853	0	0	12.74034539	0	165.6244901	0	0	216.5858716	0	0	0	0	0	0
F2S4_160526_014_G01	ALM	L5	GABAergic	Lamp5	6	Lamp5 Lsp1	Core	0	0	9.861454155	0	87.994514	5.310013776	0	0	0	0	0	0	0	0	38.68724322	0	0	0	91.02880758	0	0	0	48.54869738	0	0	0	0	0	0
F2S4_160526_014_H01	ALM	L5	GABAergic	Lamp5	6	Lamp5 Lsp1	Core	0	0	0	0	0	0	0	0	0	0	0	0	0	0	221.5167067	0.758618859	0	0	0	87.99978759	0	0	96.34459503	0	0	0	0	0	0
F2S4_160526_015_B01	ALM	L5	GABAergic	Lamp5	6	Lamp5 Lsp1	Core	0	0	0	0	51.69648195	0	0	0	26.2123007	0	0	0	0	0	104.1210834	0	0	53.15272087	0	166.0112378	0	0	24.02794231	0	0	0	0	0	0
F2S4_160526_015_E01	ALM	L1	GABAergic	Lamp5	6	Lamp5 Lsp1	Core	0	0	0	0	13.42532088	21.17069831	0	0	0	0	0	0	0	0	23.75249078	0	0	0	28.39971724	22.2034153	0	0	86.23186872	0	0	0	0	0	0
F2S4_160526_015_F01	ALM	L1	GABAergic	Lamp5	6	Lamp5 Lsp1	Intermediate	0	0	0	0	0	0	35.90148632	0	0	0	0	0	0	0	281.2283095	0	0	0	128.9794138	30.58274761	0	0	132.3036255	0	0	0	0	0	0
F2S4_160526_016_D01	ALM	L2/3	GABAergic	Lamp5	6	Lamp5 Lsp1	Core	0	0	0	0	0	12.70153923	0	0	0	0	0	0	0	0	62.85633517	0	0	0	0	22.79763452	0	0	156.3266367	0	0	0	0	0	0
F2S4_160526_016_G01	ALM	L2/3	GABAergic	Lamp5	6	Lamp5 Lsp1	Core	0	0	0	0	0	12.22307544	0	0	23.72714644	0	0	0	0	0	12.22307544	0	0	0	0	0	0	0	106.4126568	0	0	0	0	0	0
F2S4_160526_018_A01	ALM	L2/3	GABAergic	Lamp5	6	Lamp5 Lsp1	Core	0.966034703	0	0	0	0	0	54.09794336	0	0	0	0	0	0	0	89.84122737	0	0	0	13.52448584	66.6563945	0	0	62.30923833	0	0	0	0	0	0.483017351
F2S4_160526_019_D01	ALM	L2/3	GABAergic	Lamp5	6	Lamp5 Lsp1	Core	0	0	0	0	0	0	41.0113903	0	0	0	0	0	0	0	61.76414201	0	0	0	138.3516781	85.48157254	12.3528284	0	38.04671148	0	0	0	0	0	0
F2S4_160526_019_E01	ALM	L2/3	GABAergic	Lamp5	6	Lamp5 Lsp1	Core	0	0	0	0	0	22.46324834	0	0	0	0	0	0	0	0	206.253462	0	0	0	0	0	0	0	45.94755342	0	0	0	0	0	0
F2S4_160526_020_B01	ALM	L2/3	GABAergic	Lamp5	6	Lamp5 Lsp1	Core	0	0	0	0	0	0	0	0	14.17261537	0	0	0	0	0	46.06099995	0	0	0	0	0	0	0	134.639846	0	0	0	0	0	0
F2S4_160526_020_H01	ALM	L2/3	GABAergic	Lamp5	6	Lamp5 Lsp1	Core	0	0	54.33574551	0	0	0	0	0	5.645272261	0	0	0	0	0	80.44512972	0	0	0	0	247.6863204	0	0	0	0	0	0	0	0	0
F2S4_160526_021_A01	ALM	L2/3	GABAergic	Lamp5	6	Lamp5 Lsp1	Core	0	0	0	0	0	22.392229	0	0	8.9568916	0	0	0	0	0	282.7018911	0	0	0	0	33.02853778	0	0	0	0	0	0	0	0	0
F2S4_160526_021_B01	ALM	L2/3	GABAergic	Lamp5	6	Lamp5 Lsp1	Core	0	0	4.674210453	0	35.0565784	0	12.85407875	0	0	0	0	0	0	0	106.3382878	0	0	0	0	102.83263	0	0	118.0238139	0	0	0	0	0	0
F2S4_160526_022_G01	ALM	L2/3	GABAergic	Lamp5	6	Lamp5 Lsp1	Core	0	0	0	0	0	0	0	0	0	0	0	0	0	0	73.26435158	0	0	12.21072526	0	0	0	0	50.96650545	0	0	0	0	0	0
F2S4_160531_001_B01	ALM	L2/3	GABAergic	Lamp5	6	Lamp5 Lsp1	Core	0	0	0	0	0	0	0	0	1.616463791	0	0	0	0	0	0	0	0	22.63049308	0	0	0	0	22.09167182	0	0	0	0	0	0
F2S4_160531_001_C01	ALM	L2/3	GABAergic	Lamp5	6	Lamp5 Lsp1	Core	0	0	9.230476863	0	0	61.35552268	0	0	5.972661499	0	0	0	0	0	372.4768899	0	0	0	0	0	0	0	5.972661499	0	0	0	46.69535354	0	0
F2S4_160531_002_A01	ALM	L2/3	GABAergic	Lamp5	6	Lamp5 Lsp1	Core	0	0	0	0	0	9.82168443	0	0	0	0	0	0	0	0	84.92868302	0	0	0	9.243938287	0	0	0	166.9686353	0	0	0	0	0	0
F2S4_160531_005_E01	ALM	L2/3	GABAergic	Lamp5	6	Lamp5 Lsp1	Core	0	0	2.163813678	0	10.27811497	0	0	0	17.85146285	0	0	0	0	0	232.6099704	0	0	0	0	92.50303475	0	0	7.573347874	0	0	0	0.54095342	0	0
F2S4_160531_005_H01	ALM	L2/3	GABAergic	Lamp5	6	Lamp5 Lsp1	Core	0	0	0	0	0	0	0	0	0.488073914	0	0	0	0	0	91.2698219	0	0	0	0	0.488073914	0	0	233.7874048	0	0	0	0	0	0
F2S4_160531_006_D01	ALM	L2/3	GABAergic	Lamp5	6	Lamp5 Lsp1	Core	0	0	107.0120333	0	0	6.048506228	38.15211621	0	0	0	0	0	0	0	166.5665561	0	0	0	0	0	0	0	18.61078839	0	0	0	0	0	0
F2S4_160531_008_F01	ALM	L1	GABAergic	Lamp5	6	Lamp5 Lsp1	Core	0	0	0	0	0	0	0	0	0	0	0	0	0	0	124.4259569	0	0	0	0	4.56609016	0	0	97.60017716	0	0	0	0.57076127	0	0
F2S4_160531_009_E01	ALM	L1	GABAergic	Lamp5	6	Lamp5 Lsp1	Intermediate	0	0	0	0	0	0	0	0	1.714813877	0	0	0	0	0	0.571604626	0	0	0	117.1789483	48.01478855	0	0	86.31229847	0	0	0	0	0	0
F2S4_160531_010_C01	ALM	L1	GABAergic	Lamp5	6	Lamp5 Lsp1	Core	0	0	0	0	0	0	0	0	38.81627348	0	0	0	0	0	25.47317947	0	0	54.58538458	0	144.9545213	0	0	227.4391024	0	0	0	0	0	0
F2S4_160531_010_F01	ALM	L1	GABAergic	Lamp5	6	Lamp5 Lsp1	Core	0	0	0	0	0	41.20012627	0	0	0	0	0	0	0	0	35.63254164	0	0	0	50.66502015	0	0	0	73.49211714	0	0	0	0	0	0
F2S4_160531_011_D01	ALM	L1	GABAergic	Lamp5	6	Lamp5 Lsp1	Intermediate	0	0	0	0	0	41.93577851	60.89304825	0	0	0	0	0	0	0	8.042478071	0	0	0	0	0	0	0	1.723388158	0	34.46776316	0	0	0	0
F2S4_160531_011_F01	ALM	L1	GABAergic	Lamp5	6	Lamp5 Lsp1	Core	0	0	0	0	0	0	0	0	16.6540517	21.24827286	0	0	0	0	52.25926568	0	0	0	0	0	0	0	51.68498804	0	0	0	0	0	0
F2S4_160531_012_A01	ALM	L6	GABAergic	Lamp5	6	Lamp5 Lsp1	Core	0	0	0	0	0	0	0	0	0	0	0	0	0	0	224.1216021	0	0	0	0	0	0	0	0	0	0	0	0	0	0
F2S4_160531_014_D01	ALM	L6	GABAergic	Lamp5	6	Lamp5 Lsp1	Core	0	0	0	0	0	56.74609099	0	0	0	0	0	0	0	0	56.74609099	0	0	0	0	0	11.56959137	0	80.43620665	0	0	0	0	0	0
F2S4_160531_019_B01	ALM	L1	GABAergic	Lamp5	6	Lamp5 Lsp1	Core	0	0	0	0	0	0	0	0	1.327663326	0	0	0	0	0	70.36615627	0	0	0	62.40017631	9.293643281	0	0	75.67680957	0	0	0	0	0	0
F2S4_160531_020_G01	ALM	L1	GABAergic	Lamp5	6	Lamp5 Lsp1	Core	0	0	0	0	0	0	36.76298777	0	0	0	0	0	0	0	130.2282109	0	0	0	0	25.54716099	0	0	103.434847	0	0	0	0	0	0
F2S4_160531_021_C01	ALM	L2/3	GABAergic	Lamp5	6	Lamp5 Lsp1	Core	0	0	0	0	0	27.13115199	0	0	0	0	0	0	0	0	56.23547867	0	0	0	0	0	0	0	32.55738239	0	0	0	0	0	0
F2S4_160531_021_F01	ALM	L2/3	GABAergic	Lamp5	6	Lamp5 Lsp1	Core	0	0	0	0	0	39.56254454	0	0	0	69.08683152	0	0	0	0	232.0608956	0	0	0	0	1.771457218	0	0	178.9171791	0	0	0	0	0	0
F2S4_160531_021_G01	ALM	L2/3	GABAergic	Lamp5	6	Lamp5 Lsp1	Core	0	0	0	0	0	0	0	0	0	0	0	0	0	0	0	0	0	0	0	0	0	0	118.4924063	0.617147949	0	0	0	0	0
F2S4_160531_022_B01	ALM	L2/3	GABAergic	Lamp5	6	Lamp5 Lsp1	Core	0	0	0	0	0	14.69053599	0	0	0.524662	0	0	0	0	0	41.97295997	0	0	68.73072195	0.524662	94.96382193	0	0	48.26890397	0	0	0	0	0	0
F2S4_160531_023_D01	ALM	L2/3	GABAergic	Lamp5	6	Lamp5 Lsp1	Core	0	0	0.889917238	0	0	15.12859304	0	0	38.26644122	0	0	0	0	0	57.84462045	0	0	0	0	0	0	0	24.91768266	0	0	0	0	0	0
F2S4_160531_023_G01	ALM	L2/3	GABAergic	Lamp5	6	Lamp5 Lsp1	Core	0	0	0	0	0	0	0	0	11.66798364	0	0	0	0	0	224.2845743	0	0	0	0	158.8142217	0	0	47.32015586	0	0	0	0	0	0
F2S4_160531_026_H01	ALM	L2/3	GABAergic	Lamp5	6	Lamp5 Lsp1	Core	0	0	0	0	0	2.923981738	0	0	6.432759824	0	0	0	0	0	30.40941007	0	0	0	3.508778086	30.40941007	0	0	114.0352878	0	0	0	0	0	0
F2S4_160531_027_D01	ALM	L2/3	GABAergic	Lamp5	6	Lamp5 Lsp1	Core	0	0	0	0	8.427423033	85.76142263	0	0	0	0	0	0	0	0	91.21446106	0	0	0	44.615769	81.29984573	0	0	134.3430378	0	0	0	0	0	0
F2S4_160531_027_H01	ALM	L2/3	GABAergic	Lamp5	6	Lamp5 Lsp1	Core	0	0	0	0.378561459	0	0	0	0	0	0	0	0	0	0	48.8344282	0	0	0	0.378561459	133.632195	0	0	123.4110356	0	0	0	0	0	0
F2S4_160601_001_G01	ALM	L1	GABAergic	Lamp5	6	Lamp5 Lsp1	Core	0	0	0	0	0	12.41744263	121.6909378	0	6.953767874	0	0	0	0	0	164.9036382	0	0	19.37121051	96.35935483	28.3117692	0	0	26.32497838	0	0	0	0	0	0
F2S4_160601_004_C01	ALM	L5	GABAergic	Lamp5	6	Lamp5 Lsp1	Core	0	0	0	0	0	36.39965174	0	0	0	0	0	0	0	0	116.2440491	0	0	0	36.39965174	0	0	0	1.761273471	0	0	0	0	0	0
F2S4_160601_004_D01	ALM	L5	GABAergic	Lamp5	6	Lamp5 Lsp1	Core	0	0	0	0	0	0.594963279	40.45750296	0	0	50.5718787	0	0	0	0	77.34522625	0	0	0	30.34312722	0	0	0	117.8027292	0	1.784889837	0	0	0	0
F2S4_160601_005_A01	ALM	L5	GABAergic	Lamp5	6	Lamp5 Lsp1	Core	0	0	12.98988822	0	0	6.777332984	18.63766571	0	0	0	0	0	0	0	142.8887704	0	0	0	0	0	0	0	154.7491031	0	0	0	0.564777749	0	0
F2S4_160601_006_E01	ALM	L2/3	GABAergic	Lamp5	6	Lamp5 Lsp1	Core	0	0	0	0	0	4.380450924	8.274185078	0	22.87568816	0	0	0	0	0	98.3167874	0	0	0	0	0	0	0	92.96290293	0	0	0	0	0	0
F2S4_160601_006_G01	ALM	L2/3	GABAergic	Lamp5	6	Lamp5 Lsp1	Core	0	0	3.420164803	0	0.488594972	5.863139662	0	0	0	0	0	0	0	0	29.31569831	0	0	6.351734634	0	0	0	0	407.9768015	0	0	0	0	0	0
F2S4_160601_006_H01	ALM	L2/3	GABAergic	Lamp5	6	Lamp5 Lsp1	Core	0	0	0	0	0	0	0	0	10.37401793	0	0	0	0	0	111.6441929	0	0	15.80802732	0	0	0	0	47.9180828	0	0	8.892015365	0	0	0
F2S4_160601_007_C01	ALM	L2/3	GABAergic	Lamp5	6	Lamp5 Lsp1	Core	0	0	0	0	0	67.3856439	0	0	5.911021395	0	0	0	0	0	27.78180056	0	0	39.01274121	0	4.728817116	0	0	124.1314493	0	6.502123534	0	0	0	0
F2S4_160601_007_E01	ALM	L2/3	GABAergic	Lamp5	6	Lamp5 Lsp1	Core	0	0	0	0	0	24.98270542	0	0	0	0	0	0	0	0	347.973397	0	0	0	0	0	0	0	86.84464267	0	0	0	0	0	0
F2S4_160601_008_A01	ALM	L2/3	GABAergic	Lamp5	6	Lamp5 Lsp1	Core	0	0	0	0	0	4.914750915	0	0	0	0	0	0	0	0	64.43784533	0	0	0	0.546083435	0	0	0	49.14750915	0	0	26.21200488	0	0	0
F2S4_160601_008_E01	ALM	L2/3	GABAergic	Lamp5	6	Lamp5 Lsp1	Core	0	0	0	0	0	0	71.74403734	0	0	0	0	0	0	0	273.4300724	0	0	0	0	32.10921951	0	0	15.05119665	0	0	0	0	0	0
F2S4_160601_008_H01	ALM	L2/3	GABAergic	Lamp5	6	Lamp5 Lsp1	Core	0	0	0	0	0	22.32852214	28.55973762	0	0	0	0	0	0	0	179.6667131	0	0	17.65511053	93.46823222	0	0.519267957	0	0	0	0	0	6.750483438	0	0
F2S4_160601_009_H01	ALM	L2/3	GABAergic	Lamp5	6	Lamp5 Lsp1	Core	0	0	0	0	0	0.486552658	0	0	0	0	0	0	0	0	191.2151945	0	0	0	0	36.49144932	0	0	25.3007382	0	0	0	0.486552658	0	0
F2S4_160601_010_C01	ALM	L2/3	GABAergic	Lamp5	6	Lamp5 Lsp1	Core	72.04344774	0	0	0	0	16.00965505	46.18169727	0	0	0	0	0	0	0	76.35373949	0	0	0	0	28.94053029	0	0	68.96466792	0	0	0	0	0	0
F2S4_160601_011_E01	ALM	L2/3	GABAergic	Lamp5	6	Lamp5 Lsp1	Core	0.511797181	0	0	0	0	1.023594362	0.511797181	0	0	0	0	0	0	0	58.85667581	0	0	0	0.511797181	29.68423649	0	0	1.023594362	0	0	0	0	0	0
F2S4_160601_011_H01	ALM	L2/3	GABAergic	Lamp5	6	Lamp5 Lsp1	Core	0	0	0	0	0	46.14474373	0	0	12.33572357	0	0	0	0	0	185.0358536	0	0	0	0	2.741271904	0.456878651	0	0.456878651	0.456878651	0	15.53387413	0	0	0
F2S4_160601_012_F01	ALM	L2/3	GABAergic	Lamp5	6	Lamp5 Lsp1	Core	0	0	0	0	0	0.93016723	50.22903043	0	0	0	0	0	0	0	259.5166572	0	0	0	0	150.6870913	0	0	44.18294343	0	0	0	0	0	0
F2S4_160601_012_G01	ALM	L2/3	GABAergic	Lamp5	6	Lamp5 Lsp1	Core	0	0	0	0	0	2.721535942	0	0	0	0	0	26.82656857	0	0	64.92807175	0	0	0	47.43248355	0	0	0	0	0	0	0	0	0	0
F2S4_160601_012_H01	ALM	L2/3	GABAergic	Lamp5	6	Lamp5 Lsp1	Core	0	0	0	0	0	0	50.82156607	0	15.36465951	0	0	0	0	0	45.50303009	0	0	0.590948443	0	0	0	0	7.091381312	0	0	0	44.91208165	0	0
F2S4_160601_013_C01	ALM	L6	GABAergic	Lamp5	6	Lamp5 Lsp1	Core	0	0	0	0	0	29.34583248	0	0	16.30324027	0	0	0	0	0	128.2521568	0	0	0	0	16.30324027	0	0	36.95401128	0	0	0	0	0	0
F2S4_160601_013_D01	ALM	L6	GABAergic	Lamp5	6	Lamp5 Lsp1	Core	0	0	0	0	0	0	0.577346538	0	0	0	0	0	0	0	82.56055499	0	0	17.32039615	98.14891153	46.76506961	0	0	8.082851538	0	0	0	0	0	0
F2S4_160601_014_A01	ALM	L1	GABAergic	Lamp5	6	Lamp5 Lsp1	Core	0	0	0	0	0	13.32530262	0	0	0	0	0	31.98072628	0	0	195.6154424	0	0	0	0	32.51373839	0	0	0	0	0	0	0	0	0
F2S4_160601_014_E01	ALM	L1	GABAergic	Lamp5	6	Lamp5 Lsp1	Core	0	0	0.629002025	0	0	1.887006076	0	0	23.90207696	0	0	0	0	0	4.403014178	0	0	0	56.61018228	1.258004051	0	0	213.8606886	0	0	0	0	0	0
F2S4_160601_015_G01	ALM	L1	GABAergic	Lamp5	6	Lamp5 Lsp1	Core	0	0	0	0	0	0	0	0	0	0	0	0	0	0	18.01437341	0	0	0	0	0	0	0	21.10255171	0	0	0	0	0	0
F2S4_160601_016_G01	ALM	L1	GABAergic	Lamp5	6	Lamp5 Lsp1	Core	0	0	0	0	0	23.96136594	26.56586224	0	2.604496298	0	0	0	0	0	49.48542967	0	0	0	2.604496298	95.84546377	28.12856002	0	52.08992596	0	0	9.376186674	0	0	0
F2S4_160601_017_E01	ALM	L1	GABAergic	Lamp5	6	Lamp5 Lsp1	Core	0	0	0	0	0	24.73781418	0	0	0	0	0	0	0	0	77.480701	0	0	0	0	0	0	0	28.93857507	0	0	0	0.466751211	0	0
F2S4_160601_018_C01	ALM	L6	GABAergic	Lamp5	6	Lamp5 Lsp1	Core	0	0	0	0	0	0	38.49834116	0	0	0	0	0	0	0	191.2498238	0	0	0	0	0	0	0	242.7879257	0	0	0	0	0	0
F2S4_160601_019_H01	ALM	L6	GABAergic	Lamp5	6	Lamp5 Lsp1	Core	0	0	0	0	0.572122311	2.288489242	0	0	7.437590038	0	0	0	0	0	147.0354338	0	0	10.8703239	0	0	82.38561273	0	6.293345417	0	0	0	0	0	0
F2S4_160602_001_A01	ALM	L1	GABAergic	Lamp5	6	Lamp5 Lsp1	Core	0	0	0	0	0	8.094038856	0	0	0	0	0	0	0	0	453.2661759	0	0	0	0	65.90860211	0	0	9.828475754	0	0	0	0	0	0
F2S4_160602_001_C01	ALM	L1	GABAergic	Lamp5	6	Lamp5 Lsp1	Core	0	0	0	0	0	0.494669931	0	0	0	0	0	0	0	0	80.63119883	0	0	0	51.94034281	53.4243526	0	0	47.48831342	0	0	0	0	0	0
F2S4_160602_002_E01	ALM	L1	GABAergic	Lamp5	6	Lamp5 Lsp1	Core	0	0	0	0	0	2.227060387	0	0	0	0	0	0	0	0	75.27464109	0	0	26.72472465	0	30.73343334	0	0	93.53653626	0	0	0	0	0	0
F2S4_160602_003_A01	ALM	L2/3	GABAergic	Lamp5	6	Lamp5 Lsp1	Core	0	0	0	0	0	33.41309822	29.14759632	0	0	0	0	0	0	0	75.35720024	0	0	0	0	86.02095499	0	0	71.09169834	0	0	0	0	2.13275095	0
F2S4_160602_004_D01	ALM	L2/3	GABAergic	Lamp5	6	Lamp5 Lsp1	Core	0	0	0	0	0	30.23487096	51.29129894	0	11.33807661	0	0	0	0	0	178.7096837	0	0	0	40.49313075	57.23029145	0	0	46.43212325	0	0	0	0	0	0
F2S4_160602_004_E01	ALM	L2/3	GABAergic	Lamp5	6	Lamp5 Lsp1	Core	0	0	0	0	0	9.667022261	0	0	11.37296737	0	0	0	0	0	181.3988295	0	0	0	0	0	0	0	0	0	0	0.568648368	0	0	0
F2S4_160602_004_G01	ALM	L2/3	GABAergic	Lamp5	6	Lamp5 Lsp1	Core	0	0	0	0	0	26.72219402	0	0	0	0	0	0	0	0	43.1666211	0	0	0	0	0	0	0	33.40274252	0	0	0	0	0	0
F2S4_160602_005_B01	ALM	L2/3	GABAergic	Lamp5	6	Lamp5 Lsp1	Core	0	0	0	41.14339927	0	38.72319931	10.08416649	0	0	0	0	0	0	0	4.033666595	0	0	0	62.52183222	62.92519888	0	0	59.29489894	0	0	0	0	0	0
F2S4_160602_006_G01	ALM	L2/3	GABAergic	Lamp5	6	Lamp5 Lsp1	Core	0	0	0	0	0	0	0	0	0	0	0	0	0	0	107.4877904	0	0	0	0	13.28034476	0	0	24.90064642	0	0	0	0	0	0
F2S4_160602_007_G01	ALM	L2/3	GABAergic	Lamp5	6	Lamp5 Lsp1	Core	0	0	0	0	0	0	0	0	12.29023207	0	0	0	0	0	189.6207234	0	0	15.80172695	0	0	0	0	72.86351873	0	0	0	0	0	0
F2S4_160602_007_H01	ALM	L2/3	GABAergic	Lamp5	6	Lamp5 Lsp1	Core	0	0	0	0	0	50.45564099	0	0	0	0	0	0	0	0	30.2733846	0	0	0	0	0	0	0	0	0	0	0	0	0	0
F2S4_160602_008_F01	ALM	L5	GABAergic	Lamp5	6	Lamp5 Lsp1	Core	0	0	0	0	0	21.43749979	41.22596114	0	0.549679482	0	0	0	0	0	180.2948701	0	0	0	0	72.55769161	0	0	95.09455037	0	0	0	0	0	0
F2S4_160602_010_F01	ALM	L6	GABAergic	Lamp5	6	Lamp5 Lsp1	Core	0	0	21.36697843	0	0	39.26904144	0	0	0	0	0	0	0	0	213.6697843	0	0	0	0.577485904	34.07166831	0	0	61.79099168	0	0	0	0	0	0
F2S4_160602_011_F01	ALM	L6	GABAergic	Lamp5	6	Lamp5 Lsp1	Core	0	0	0	0	0	0	0	0	44.27267655	0	0	0	0	0	108.9788961	0	0	0	0	176.5231078	0	0	125.4392502	0	0	0	0	0	0
F2S4_160602_012_A01	ALM	L6	GABAergic	Lamp5	6	Lamp5 Lsp1	Core	0	0	0	0	0	56.98946572	1.461268352	0	24.35447253	0	0	0	0	0	293.7149387	0	0	17.04813077	0	132.4883306	0	0	56.01528682	0	0	0	0	0	0
F2S4_160602_012_E01	ALM	L6	GABAergic	Lamp5	6	Lamp5 Lsp1	Core	0	0	0	0	0	1.809754941	0	0	28.95607906	27.14632412	0	0	0	0	162.8779447	0	0	21.11380765	0	0	0	0	0.603251647	0	0	7.239019764	0	0	0
F2S4_160602_012_G01	ALM	L6	GABAergic	Lamp5	6	Lamp5 Lsp1	Core	0	0	0	0	0	0	0	0	0	0	0	0	0	0	76.92816308	0	0	0	0	0	0	0	157.0351759	0	0	0	0	0	0
F2S4_160602_013_A01	ALM	L6	GABAergic	Lamp5	6	Lamp5 Lsp1	Core	0	0	0	0	0	0	0	0	0	0	0	0	0	0	97.88261167	0	0	0	0	65.94927737	122.8739168	0	147.8652219	0	0	0	0	0	0
F2S4_160602_013_C01	ALM	L6	GABAergic	Lamp5	6	Lamp5 Lsp1	Core	0	0	0	0	0	7.963645539	0	0	0	0	0	0	0	0	25.14835433	0	0	0	0	207.8930625	0.838278478	0	50.71584791	0	0	0	0	0	0
F2S4_160602_015_H01	ALM	L6	GABAergic	Lamp5	6	Lamp5 Lsp1	Core	0	0	213.2185414	0	0	0	0	0	0	0	0	0	0	0	0	0	0	0	0	0	0	0	41.33314515	0	0	5.040627457	0	0	0
F2S4_160613_003_C01	ALM	L1	GABAergic	Lamp5	6	Lamp5 Lsp1	Core	0	0	0	0	0	0	0	0	0	0	0	0	0	0	246.1400623	0	0	0	0	121.2239807	0	0	62.15036573	0	0	0	0	0	0
F2S4_160613_005_A01	ALM	L1	GABAergic	Lamp5	6	Lamp5 Lsp1	Core	0	0	0	0	0	0	0	0	0	0	0	0	0	0	103.0600029	0	0	0	33.70208626	0	0	0	60.56606806	0	0	0	0	0	0
F2S4_160613_006_E01	ALM	L1	GABAergic	Lamp5	6	Lamp5 Lsp1	Core	0	0	0	0	0	0	0	0	0	0	0	0	0	0	6.397044054	0	0	19.83083657	12.1543837	0	0	0	13.43379251	0	0	0	0.639704405	0	0
F2S4_160613_006_H01	ALM	L1	GABAergic	Lamp5	6	Lamp5 Lsp1	Core	0	0	0	0	0	38.58322401	23.64778246	0	0	0	0	0	0	0	37.96091395	0	0	0	3.111550324	0	0	0	31.7378133	0	0	0	0	0	0
F2S4_160613_007_C01	ALM	L5	GABAergic	Lamp5	6	Lamp5 Lsp1	Core	2.584815887	0	0	0	0	0	0	0	0	0	0	0	0	0	91.11476001	0	0	0	0	60.74317334	0	0	38.12603433	0	0	0.646203972	0	0	0
F2S4_160613_008_E01	ALM	L5	GABAergic	Lamp5	6	Lamp5 Lsp1	Core	0	0	0	0	0	56.34510946	0	0	0	0	0	0	0	0	6.934782703	0	0	0	86.68478379	0	0	0	50.2771746	0	0	0	0	0	0
F2S4_160613_009_G01	ALM	L5	GABAergic	Lamp5	6	Lamp5 Lsp1	Core	0	0	0	0	0	35.96770653	0	0	0	0	0	0	0	0	35.96770653	20.28947548	0	0	24.43959546	0	0	0	71.93541307	0	11.52811107	0	0	0	0
F2S4_160613_010_B01	ALM	L5	GABAergic	Lamp5	6	Lamp5 Lsp1	Core	0	0	0	0	48.79640808	0	51.965006	0	0	0	0	0	0	0	222.4355745	0	0	31.05225969	0	0	0	0	75.41263067	0	0	0	4.436037098	0	0
F2S4_160613_011_B01	ALM	L5	GABAergic	Lamp5	6	Lamp5 Lsp1	Core	0	0	0	0	0	11.14321138	16.42157466	0	0	0	0	0	0	0	36.948543	0	0	29.91072528	0	117.8834467	29.32424047	0	104.9807809	0	0	0	0	0	0
F2S4_160613_011_D01	ALM	L5	GABAergic	Lamp5	6	Lamp5 Lsp1	Core	0	0	0	0	0	0.599754461	1.799263382	0	0	0	0	0	0	0	54.57765591	0	0	0	0	0	0	0	57.57642821	0	0	0	0	0	0
F2S4_160613_013_E01	ALM	L2/3	GABAergic	Lamp5	6	Lamp5 Lsp1	Core	0	0	0	0	0	13.67537911	44.70797017	0	0	0	0	0	0	0	177.7799284	0	0	0	0	0	0	0	53.12358808	0	0	0	0	0	0
F2S4_160613_013_H01	ALM	L2/3	GABAergic	Lamp5	6	Lamp5 Lsp1	Core	0	0	0	0	0	0	0	0	0	0	0	0	0	0	176.6387505	0	0	4.131900597	0	0	0	0	3.615413022	0	0	42.86846869	73.85772317	0	0
F2S4_160613_015_H01	ALM	L2/3	GABAergic	Lamp5	6	Lamp5 Lsp1	Core	0	0	0	0	0	0	24.63826438	0	0	37.19894819	0	0	0	0	185.5116377	0	0	0	0	208.7005924	0	0	54.59066422	0	0	0	0	0	0
F2S4_160613_016_A01	ALM	L2/3	GABAergic	Lamp5	6	Lamp5 Lsp1	Core	0	0	0	0	0	6.124049868	0	0	20.04234502	35.07410379	0	0	0	0	88.52035718	0	0	0	0	90.1905526	0	0	128.6050472	0	0	0	0	0	0
F2S4_160613_016_F01	ALM	L2/3	GABAergic	Lamp5	6	Lamp5 Lsp1	Core	0	0	16.21655119	0	0	0	0	0	0	0	0	0	0	0	79.92443087	0	0	0	122.782459	27.79980204	0	0	5.212462883	0	0	0	34.17059001	0	0
F2S4_160613_017_C01	ALM	L2/3	GABAergic	Lamp5	6	Lamp5 Lsp1	Core	0	0	0	0	0	0	0	0	0	0	0	0	0	0	77.86096607	0	0	0	0	0	0	0	4.68336638	0	0	0	0	0	0
F2S4_160613_017_F01	ALM	L2/3	GABAergic	Lamp5	6	Lamp5 Lsp1	Core	0	0	0	0	0	0	0	0.574341632	0	0	0	0	0	0	20.67629876	0	0	0	0	140.7136999	0	0	77.53612035	0	0	15.50722407	0	0	0
F2S4_160613_018_A01	ALM	L2/3	GABAergic	Lamp5	6	Lamp5 Lsp1	Core	0	0	0	0	0	5.368864879	0	0	0	0	0	0	0	0	206.9995681	0	0	0	0	75.1641083	0	0	60.84713529	0	0	0	0	0	0
F2S4_160613_018_D01	ALM	L2/3	GABAergic	Lamp5	6	Lamp5 Lsp1	Core	0	0	84.72055997	0	0	0	0	0	62.67000326	0	0	0	0	0	154.9341747	0	0	0	0	0	0	0	54.83625286	0	0	0	14.5069452	0	0
F2S4_160613_018_E01	ALM	L2/3	GABAergic	Lamp5	6	Lamp5 Lsp1	Core	0	0	0	0	0	17.60446489	0	0	0	0	0	0	0	0	97.57903399	0	0	0	68.40592073	0	0	0	115.1834989	0	0	0	0	0	0
F2S4_160613_019_F01	ALM	L2/3	GABAergic	Lamp5	6	Lamp5 Lsp1	Core	0	0	1.070380172	0	0	0	27.29469439	0	0	0	0	0	0	0	40.13925646	0	0	0	0	0	0	0	0	0.535190086	0	0	0	0	0
F2S4_160613_019_H01	ALM	L2/3	GABAergic	Lamp5	6	Lamp5 Lsp1	Core	0	0	0	0	0	1.800509544	1.200339696	0	0	0	0	0	0	0	90.62564706	0	0	22.80645423	1.200339696	121.2343093	0	0	12.60356681	0	0	0	0	0	0
F2S4_160613_020_G01	ALM	L6	GABAergic	Lamp5	6	Lamp5 Lsp1	Core	0	0	0	0	0	0	20.67480323	0	6.146563121	0	0	1.117556931	0	0	107.8442439	0	0	0	125.1663763	88.28699756	0	0	2.793892328	0	0	0	0	0	0
F2S4_160613_021_B01	ALM	L6	GABAergic	Lamp5	6	Lamp5 Lsp1	Core	0	0	0	0	0	17.42119522	0	0	0	0	0	0	0	0	6.968478089	0	0	0	58.73431532	0	0	0	119.4596244	0	0	0	0	0	0
F2S4_160613_021_F01	ALM	L6	GABAergic	Lamp5	6	Lamp5 Lsp1	Core	0	0	0	0	0	0	0	0	2.029791246	0	0	0	0	0	94.89274076	0	0	19.79046465	0	0	110.6236229	0	26.3872862	0	0	0	0	0	0
F2S4_160613_022_A01	ALM	L6	GABAergic	Lamp5	6	Lamp5 Lsp1	Core	0	0	0	0	0	13.12861858	0	0	5.001378505	0	0	0	0	0	16.25448014	0	0	0	0	0	23.7565479	0	55.64033587	0	0	0	0	0	0
F2S4_160613_022_H01	ALM	L6	GABAergic	Lamp5	6	Lamp5 Lsp1	Core	41.17487355	0	0	0	0	0	0	0	0	0	0	0	0	0	102.9371839	0	0	0	5.790216593	0	0	0	51.46859194	0	0	0	0	0	0
F2S4_160613_026_B01	ALM	L5	GABAergic	Lamp5	6	Lamp5 Lsp1	Core	0	0	0	0	0	0	0	0	0	0	0	0	0	0	137.9773685	0	0	0	0	156.0205629	0	0	73.76482394	0	0	0	0	0	0
F2S4_160613_027_H01	ALM	L5	GABAergic	Lamp5	6	Lamp5 Lsp1	Core	0	0	0	0	0	17.10547557	29.40003614	0	48.64369615	0	0	0	0	0	44.90187337	0	0	0	3.741822781	27.7963978	0	0	27.26185169	0	0	0.534546112	0	0	0
F2S4_160613_028_A01	ALM	L5	GABAergic	Lamp5	6	Lamp5 Lsp1	Core	0	0	0	0	0	1.147807143	0	0	0	43.61667144	0	0	0	0	144.6237	0	0	0	12.62587857	84.36382502	0	0	17.79101072	0	0	0	0	0	0
F2S4_160613_028_H01	ALM	L5	GABAergic	Lamp5	6	Lamp5 Lsp1	Core	0	0	0	0	0	4.627765668	0	0	0	0	0	0	0	0	51.41961854	0	0	40.10730246	0	71.98746595	0	0	75.58683925	0	0	0	0	0	0
F2S4_160620_001_E01	ALM	L2/3	GABAergic	Lamp5	6	Lamp5 Lsp1	Core	0	0	0	0	0	34.01833123	15.75585867	0	0	0	0	0	0	0	75.91459179	0	0	0	0	0	27.21466498	0	58.72638233	0	0	0	0	0	0
F2S4_160620_001_G01	ALM	L2/3	GABAergic	Lamp5	6	Lamp5 Lsp1	Core	0	0	0	0	0	0	0	0	0	0	0	0	0	0	40.19251879	0	0	0	0	2.026513552	0	0	83.08705564	0	0	0	0	0	0
F2S4_160620_003_D01	ALM	L2/3	GABAergic	Lamp5	6	Lamp5 Lsp1	Core	0	0	0	0	0	3.920584638	18.03468933	0	0	0	0	0	0	0	323.8402911	0	0	0	0	0	0	0	6.664993884	0	0	0	0	0	0
F2S4_160620_004_F01	ALM	L2/3	GABAergic	Lamp5	6	Lamp5 Lsp1	Core	0	0	0	0	0	17.71206881	46.49418064	0	4.744304147	0.316286943	0	0	0	0	44.28017203	0	0	0	44.59645898	0	0	0	27.20067711	0	0	0	0	0	0
F2S4_160620_006_B01	ALM	L2/3	GABAergic	Lamp5	6	Lamp5 Lsp1	Core	0	0	0	0	0	0.761969783	0	0	2.28590935	0	0	0	0	0	198.8741134	0	0	0	0	0	0	0	72.38712942	0	0	0	0	0	0
F2S4_160620_007_E01	ALM	L2/3	GABAergic	Lamp5	6	Lamp5 Lsp1	Core	0	0	0	0	0	0.696305611	12.533501	0	0	0	0	0	0	0	109.319981	0	0	24.3706964	0	201.9286273	0	0	31.33375251	0	0	0	0	0	0
F2S4_160620_011_B01	ALM	L6	GABAergic	Lamp5	6	Lamp5 Lsp1	Core	0	0	83.13621353	0	3.641002052	0	0	0	0	0	0	0	0	0	78.8883778	0	0	0	0	0	0	0	106.1958932	0	0	0	0	0	0
F2S4_160620_012_C01	ALM	L2/3	GABAergic	Lamp5	6	Lamp5 Lsp1	Core	0	0	0	0	0	57.3173749	0	0	0	0	0	0	0	0	296.1397703	0	0	0	0	80.24432486	0	0	0	0	0	0	0	0	0
F2S4_160620_013_D01	ALM	L2/3	GABAergic	Lamp5	6	Lamp5 Lsp1	Core	0	0	0	0	0	0	0	0	0	0	0	0	0	0	77.03105207	0	0	0	17.11801157	161.1106971	0	0	108.7497206	0	0	0	0	0	0
F2S4_160620_014_C01	ALM	L2/3	GABAergic	Lamp5	6	Lamp5 Lsp1	Core	0	0	0	0	0	1.562970519	11.46178381	0	0.520990173	0	0	0	0	0	230.7986467	0	0	0	0	69.29169302	0	0	240.1764698	0	0	0	0	0	0
F2S4_160620_019_D01	ALM	L6	GABAergic	Lamp5	6	Lamp5 Lsp1	Core	0	0	64.45018821	0	68.70633272	19.45666059	0	0	1.216041287	0	0	0	0	0	64.45018821	0	0	0	21.88874317	0	0	0	53.50581663	0	0	0	0	0	0
F2S4_160620_019_E01	ALM	L6	GABAergic	Lamp5	6	Lamp5 Lsp1	Core	0	0	0	0	0	61.57474885	3.62204405	0	34.77162288	0	0	0	0	0	63.02356647	0	0	0	0	0	0	0	54.33066075	0	0	0	0	0	0
F2S4_160620_025_E01	ALM	L2/3	GABAergic	Lamp5	6	Lamp5 Lsp1	Core	0	0	0	0	0	0.374064185	29.92513479	0	0	0	0	0	0	0	45.26176638	0	0	0	0	133.1668498	0	0	74.06470862	0	0	0	0	0	0
F2S4_160620_028_F01	ALM	L2/3	GABAergic	Lamp5	6	Lamp5 Lsp1	Core	0	0	0	0	0	12.21279575	0	0	0	0	0	0	0	0	122.1279575	0	0	0	0	0	0	0	73.78564101	0	0	0	0	0	0
F2S4_160620_028_G01	ALM	L2/3	GABAergic	Lamp5	6	Lamp5 Lsp1	Core	0	0	0	0	0	0	0	0	0	0	0	0	0	0	131.5628897	0	0	0	0	92.86792217	0	0	73.81809198	0	0	0	0	0	0
F2S4_160620_032_G01	ALM	L6	GABAergic	Lamp5	6	Lamp5 Lsp1	Core	0	0	0	0	0	4.351079078	0	0	0	0	0	0	0	0	49.44408043	0	0	0	54.38848847	41.13747491	56.56402801	0	46.87298824	0	0	0	0	0	0
F2S4_160620_033_E01	ALM	L6	GABAergic	Lamp5	6	Lamp5 Lsp1	Core	0	0	62.64143481	0	0	14.88787464	0	0	23.31497349	0	0	0	0	0	80.05743911	0	0	0	0	0	0	0	30.33755587	0	0	0	0	0	0
F2S4_160620_036_C01	ALM	L6	GABAergic	Lamp5	6	Lamp5 Lsp1	Core	0	0	0	0	0	0	0	0	0	0	0	0	0	0	16.42279619	0	0	0	0	29.46442846	24.15117087	0	28.49838163	0	0	0	0	0	0
F2S4_160623_002_A01	ALM	L6	GABAergic	Lamp5	6	Lamp5 Lsp1	Core	0	0	0	0	0	0.540457573	0	0	0.540457573	0	0	0	0	0	44.31752099	0	0	12.97098175	0	0	0	0	80.52817838	0	0	0	0	0	0
F2S4_160623_002_G01	ALM	L6	GABAergic	Lamp5	6	Lamp5 Lsp1	Core	0	0	0	0	0	0	0	0	3.848532042	0	0	0	0	0	194.9922901	0	0	0	27.5811463	0	0	0	92.364769	0	0	0	0	0	0
F2S4_160623_003_G01	ALM	L6	GABAergic	Lamp5	6	Lamp5 Lsp1	Core	0	0	35.55465564	0	0	7.834076667	0	0	28.32320026	0	0	0	0	0	60.86474949	0	0	0	0	106.0613456	11.44980436	0	56.64640051	0	0	0	0	0	0
F2S4_160623_010_H01	ALM	L6	GABAergic	Lamp5	6	Lamp5 Lsp1	Core	0	0	0	0	0	0	29.7663236	0	0	0	0	0	0	0	2.510412834	0	0	0	21.15919388	0	57.38086477	0	21.15919388	0	0	18.29015065	0	0	0
F2S4_160623_029_B01	ALM	L2/3	GABAergic	Lamp5	6	Lamp5 Lsp1	Core	0	0	0	0	0	44.21585549	0	0	0	3.684654624	0	0	0	0	66.32378323	0	0	0	0	57.90171552	0	0	87.37895252	0	11.05396387	0	0	0	0
F2S4_160629_013_B01	ALM	L1	GABAergic	Lamp5	6	Lamp5 Lsp1	Core	0	0	0	0	0	0	0	0	0	0	0	46.16370716	0	0	179.328247	0	0	0	59.18423995	118.9603223	0	0	125.4705887	0	0	0	0	0	0
F2S4_160629_014_A01	ALM	L1	GABAergic	Lamp5	6	Lamp5 Lsp1	Core	0	0	0	0	0	23.71789931	0	0	10.78086332	0	0	0	0	0	55.5214461	0	0	0	1.617129498	66.30230942	0	0	81.39551807	0	0	0	0	0	0
F2S4_160629_014_E01	ALM	L1	GABAergic	Lamp5	6	Lamp5 Lsp1	Core	0	0	0	0	0	1.607700672	0	0	0	0	0	0	0	0	92.71073874	0	0	0	0	40.1925168	0	0	69.13112889	0	0	0	0	0	0
F2S4_160629_014_F01	ALM	L1	GABAergic	Lamp5	6	Lamp5 Lsp1	Core	0	0	0	0	0	5.06934612	24.83979599	0	0	0	0	0.506934612	0	0	85.67194943	0	0	0	0	54.24200349	0	0	6.083215344	0	0	0	0	0	0
F2S4_160629_015_H01	ALM	L1	GABAergic	Lamp5	6	Lamp5 Lsp1	Intermediate	0	0	0	0	0	52.78340451	112.8305803	0	0	0	0	0	0	0	40.19286765	0	0	0	66.82669562	63.4369357	0	0	58.1101701	0	0	0	0	0	0
F2S4_160629_016_E01	ALM	L1	GABAergic	Lamp5	6	Lamp5 Lsp1	Core	0	0	0	0	0	0	0	0	0	0	0	39.92266744	0	0	201.3746314	0	0	0	0	169.6713366	0	0	10.56776491	0	0	0	0.587098051	0	0
F2S4_160629_017_B01	ALM	L1	GABAergic	Lamp5	6	Lamp5 Lsp1	Core	0	0	0	0	0	0	32.8421044	0	0	0	0	0	0	0	0	0	0	0	0	0	0	0	39.51315685	0	0	0	0	0	0
F2S4_160629_017_H01	ALM	L1	GABAergic	Lamp5	6	Lamp5 Lsp1	Core	0	0	0	0	0	18.00680143	0	0	9.260640733	0	0	21.09368167	0	0	52.47696416	0	0	0	37.04256293	18.00680143	0	0	88.49056701	0	0	0	0	0	0
F2S4_160629_018_G01	ALM	L1	GABAergic	Lamp5	6	Lamp5 Lsp1	Core	0	0	24.31872116	0	50.66400242	0	0	0	6.755200322	0	0	0	0	0	92.54624441	0	0	1.351040064	0	62.823363	0	0	88.49312422	0	0	0	0	0	0
F2S4_160629_020_H01	ALM	L5	GABAergic	Lamp5	6	Lamp5 Lsp1	Core	0	0	0	0	0	0	0	0	0	0	0	0	0	0	0	0	0	0	3.35011181	0	0	0	2.791759842	0	0	0	0	0	0
F2S4_160629_024_H01	ALM	L5	GABAergic	Lamp5	6	Lamp5 Lsp1	Core	0	0	0	0	0	0	0	0	0	0	0	0	0	0	95.29395819	0	0	0	0	10.6539829	46.16725925	0	97.069622	0	0	0	0	0	0
F2S4_160630_001_B01	ALM	L1	GABAergic	Lamp5	6	Lamp5 Lsp1	Intermediate	0	0	0	0	0	37.86829879	0	0	0	0	0	0	0	0	186.5013715	0	0	0	21.7742718	0	0	0	37.86829879	0	0.473353735	0	36.92159132	0	0
F2S4_160630_001_C01	ALM	L1	GABAergic	Lamp5	6	Lamp5 Lsp1	Core	0	0	0.435393295	0	0.435393295	0	36.57303679	0	0	0	0	0	0	0	116.6854031	0	0	0	0	167.1910253	0	0	13.93258544	0	0	0	0.87078659	0	0
F2S4_160707_003_A01	ALM	L1	GABAergic	Lamp5	6	Lamp5 Lsp1	Core	0	0	0	0	0	0	0	0	10.39546065	0	0	0	0	0	72.19069895	0	0	0	45.62452174	157.6644865	0	0	91.82656906	0	0	0	0	0	0
F2S4_160707_006_D01	ALM	L1	GABAergic	Lamp5	6	Lamp5 Lsp1	Core	0	0	0	0	0	2.135023133	0	0	0	0	0	0	0	0	78.28418154	0	0	0	44.83548579	0	0	0	44.83548579	0	0	0	0	0	0
F2S4_160708_005_E01	ALM	L1	GABAergic	Lamp5	6	Lamp5 Lsp1	Core	0	0	0	0	0	4.785716868	0	0	0	0	0	0.531746319	0	0	105.8175174	0	0	0	9.571433737	0	67.00003616	0	72.31749935	0	0	0.531746319	0	0	0
F2S4_160721_002_A01	ALM	L1	GABAergic	Lamp5	6	Lamp5 Lsp1	Core	0	0	0	0	0	45.0153052	0	0	0	0	0	0	0	0	73.77508353	0	0	0	0	104.4104996	0	0	176.935158	0	0	0	0	0	0
F2S4_160721_002_B01	ALM	L1	GABAergic	Lamp5	6	Lamp5 Lsp1	Core	0	0	0	0	0	26.43947114	0	0	0	0	0	0	0	0	226.459818	0	0	0	0	174.1556469	0	0	131.0478135	0	0	0	0	0	0
F2S4_160721_002_E01	ALM	L1	GABAergic	Lamp5	6	Lamp5 Lsp1	Intermediate	0	0	0	0	0	1.804735988	0	0	0	0	0	0	0	0	208.1462173	0	0	0	0	0	0	0	0	0	0	0	0	0	0
F2S4_160721_002_F01	ALM	L1	GABAergic	Lamp5	6	Lamp5 Lsp1	Core	0	0	0	0	0	28.27078226	0	0	13.5464165	0	0	0	0	0	71.26593029	0	0	0	0	10.60154335	0	0	35.92745246	0	0	0	0	0	0
F2S4_160721_002_G01	ALM	L1	GABAergic	Lamp5	6	Lamp5 Lsp1	Core	0	0	0	0	0	0	0	0	0	0	0	0	0	0	162.2826712	0	0	0	0	56.19497029	0	0	90.33210177	0	0	0.525186638	0	0	0
F2S4_160721_003_F01	ALM	L1	GABAergic	Lamp5	6	Lamp5 Lsp1	Core	0	0	0	0	0	0	0	0	15.70566683	0	0	0	0	0	73.48008409	0	0	0	51.04341719	25.80216693	0	0	76.28466745	0	0	0	0	0	0
F2S4_160721_003_G01	ALM	L1	GABAergic	Lamp5	6	Lamp5 Lsp1	Core	0	0	0	0	0	0	38.25106331	0	0	0	0	0	0	0	222.6408044	0	0	0	162.3218199	38.74146155	0	0	59.8285862	0	0	0	0	0	0
F2S4_160721_005_B01	ALM	L1	GABAergic	Lamp5	6	Lamp5 Lsp1	Core	0	0	0	0	0	42.57246026	0	0	19.9040074	0	0	0	0	0	56.94757671	0	0	0	28.7502329	0	0	0	7.74044732	0	0	0	0	0	0
F2S4_160721_005_C01	ALM	L1	GABAergic	Lamp5	6	Lamp5 Lsp1	Core	0	0	0	0	0	0	0	0	0	0	0	0	0	0	152.7069836	0	0	0	101.5804164	0	0	0	5.381743914	0	0	0	0	0	0
F2S4_160721_006_F01	ALM	L1	GABAergic	Lamp5	6	Lamp5 Lsp1	Core	1.14381795	0	0	0	0	22.30445002	0	0	0	0	0	0	0	0	128.1076104	0	0	0	2.2876359	0.571908975	0	0	82.3548924	0	0	0	0	0	0
F2S4_160721_006_G01	ALM	L1	GABAergic	Lamp5	6	Lamp5 Lsp1	Intermediate	0	0	0	0	0	0.617741537	50.03706449	0	0	0	0	0	0	0	195.8240672	0	0	0	0	0	0	0	182.2337534	0	0	0	0	0	0
F2S4_160819_001_G01	ALM	L1	GABAergic	Lamp5	6	Lamp5 Lsp1	Core	0	0	0	0	0	0	25.62375542	0	0	0	0	0	0	0	190.8708312	0	0	0	0	152.6966649	23.53202028	0	1.045867568	0	0	0.522933784	0	0	0
F2S4_160819_002_C01	ALM	L1	GABAergic	Lamp5	6	Lamp5 Lsp1	Core	0	0	0	0	0	0	0	0	0	0	0	0	0	0	225.3895029	0	0	0	0	104.2765893	0	0	112.4231978	0	0	0	0.543107236	0	0
F2S4_160819_004_B01	ALM	L1	GABAergic	Lamp5	6	Lamp5 Lsp1	Core	0	0	0	0	0	0	0	0	0	0	0	0	0	0	138.6455925	0	0	0	0	0	0	0	18.13057749	0	0	0	0	0	0
F2S4_160819_005_A01	ALM	L1	GABAergic	Lamp5	6	Lamp5 Lsp1	Core	0	0	0	0	0	0.55233483	0	0	0	0	0	0.55233483	0	0	0	0	0	0	11.0466966	36.45409877	0	0	55.23348298	0	0	0	0	0	0
F2S4_160819_006_A01	ALM	L1	GABAergic	Lamp5	6	Lamp5 Lsp1	Core	0	0	0	0	0	0	0	0	59.37546902	0	0	0	0	0	180.8752714	0	0	0	7.147047197	0	0	0	58.82569616	0	0	0.549772861	0	0	0
F2S4_160819_006_C01	ALM	L1	GABAergic	Lamp5	6	Lamp5 Lsp1	Core	0	0	0	0	0	13.5102979	0	0	0	0	0	0	0	0	337.7574474	0	0	0	0	104.5958547	0	0	16.56101033	0	0	0	0	0	0
F2S4_160819_006_G01	ALM	L1	GABAergic	Lamp5	6	Lamp5 Lsp1	Core	0	0	0	0	0	3.762710318	0	0	0	0	0	0	0	0	151.9194291	0	0	0	3.762710318	71.02115725	0	0	43.74150745	0	0	0	0	0	0
F2S4_160819_007_C01	ALM	L1	GABAergic	Lamp5	6	Lamp5 Lsp1	Core	0	0	0	0	0	17.70659882	0	0	0	0	0	0	0	0	46.7454209	0	0	0	34.7049337	150.860222	0	0	70.11813134	0	0	0	0	0	0
F2S4_160819_009_B01	ALM	L1	GABAergic	Lamp5	6	Lamp5 Lsp1	Core	0	0	0	0	0	0	3.09887263	0	0	0	0	0	0	0	241.7120652	0	0	0	0	0.516478772	0	0	16.52732069	0	0	0	0	0	0
F2S4_160819_009_F01	ALM	L1	GABAergic	Lamp5	6	Lamp5 Lsp1	Core	0	0	0.52095896	0	0	9.898220248	33.34137347	0	21.88027634	0	0	33.86233243	0	0	102.6289152	0	0	25.0060301	84.39535159	60.95219837	0	0	0	0	0	0	0	0	0
F2S4_160819_013_A01	ALM	L1	GABAergic	Lamp5	6	Lamp5 Lsp1	Core	0	0	0	0	0	0	0	0	0	0	0	0	0	0	238.8341743	0	0	40.02440833	2.624551366	291.9813394	24.27710013	0	46.58578674	0	0	0	0	0	0
F2S4_160819_013_F01	ALM	L1	GABAergic	Lamp5	6	Lamp5 Lsp1	Core	0	0	0	0	0	41.29599777	44.77879276	0	0	0	0	0	0	0	21.89185424	0	0	59.20751488	0	188.5684717	0	0	70.65098414	0	0	0	0	0	0
F2S4_160819_014_E01	ALM	L1	GABAergic	Lamp5	6	Lamp5 Lsp1	Core	0	0	0	0	0	0.983708799	0	0	0	31.97053595	0	0	0	0	71.8107423	0	0	0	2.459271996	224.2856061	0	0	328.5587387	0	10.82079678	0	0	0	0
F2S4_160819_014_G01	ALM	L1	GABAergic	Lamp5	6	Lamp5 Lsp1	Core	0	0	0	0	0	22.06014281	0	0	6.372930146	0	0	0	0	0	84.31876808	0	0	0	0	0	0	0	56.86614592	0	0	0	0	0	0
F2S4_160819_016_A01	ALM	L1	GABAergic	Lamp5	6	Lamp5 Lsp1	Core	0	0	0	0	0	0	14.95603408	0	10.61395967	0	0	1.92981085	0	0	64.64866346	0	0	0	19.78056121	181.4022199	0	0	61.27149447	0	0	0	0	0	0
F2S4_160819_016_D01	ALM	L1	GABAergic	Lamp5	6	Lamp5 Lsp1	Core	0	0	0	0	0	38.6113765	57.91706474	0	0	0	0	0	0	0	306.9109414	0	0	0	0	0	0	0	5.940211769	0	0	0	0	0	0
F2S4_160819_017_B01	ALM	L1	GABAergic	Lamp5	6	Lamp5 Lsp1	Core	0	0	0	0	0	15.06411286	0	0	1.506411286	0	0	0	0	0	137.0834271	0	0	0	108.4616126	68.79278208	0	0	0	0	0	0	0	0	0
F2S4_160819_017_G01	ALM	L1	GABAergic	Lamp5	6	Lamp5 Lsp1	Core	0	0	0	0	0	1.535654834	0	0	0	0	0	0	0	0	161.2437576	0	0	0	0	45.04587513	0	0	47.09341491	0	0	0	0	0	0
F2S4_160819_018_B01	ALM	L2/3	GABAergic	Lamp5	6	Lamp5 Lsp1	Core	3.538482769	0	0	0	0	0	16.68141877	0	0	0	0	0	0	0	279.0346412	0	0	0	15.16492615	0	0	0	60.15420708	0	0	0	0	0	0
F2S4_161004_026_E01	ALM	L1-L2/3	GABAergic	Lamp5	6	Lamp5 Lsp1	Core	0	0	0	0	0	5.903919612	0	0	0	0	0	0	0	0	167.2777223	0	0	0	0	54.61125641	0	0	18.20375214	0	0	0	0	0	0
F2S4_161004_026_H01	ALM	L1-L2/3	GABAergic	Lamp5	6	Lamp5 Lsp1	Core	0	0	0	0	0	4.217651434	57.64123626	0	0	0	0	0	0	0	33.27258353	0	0	0	8.435302867	104.9726579	0	0	48.73730545	0	0	0	0	0	0
F2S4_161011_003_A01	ALM	L1-L2/3	GABAergic	Lamp5	6	Lamp5 Lsp1	Core	0	0	0	0	0	4.502753434	0	0	0	0	0	0	0	0	60.03671245	0	0	0	0	0	0	0	42.52600465	0	0	0	0	0	0
F2S4_161011_004_B01	ALM	L5-L6	GABAergic	Lamp5	6	Lamp5 Lsp1	Core	1.709873264	0	63.83526853	0	60.98547976	5.129619793	0	0	22.22835243	0	0	0	0	0	106.5821001	0	0	0	74.09450812	0	0	0	1.709873264	0	0	0	7.409450812	0	0
F2S4_161011_007_G01	ALM	L1-L2/3	GABAergic	Lamp5	6	Lamp5 Lsp1	Intermediate	0	0	0	0	0	10.17767309	0	0	0	0	0	0	0	0	167.6892805	0	0	12.60092859	0	111.4697529	0	0	73.18231605	0	0	0.4846511	0	0	0
F2S4_161019_002_G01	ALM	L1	GABAergic	Lamp5	6	Lamp5 Lsp1	Intermediate	0	0	68.04279062	0	0	22.68093021	0	0	0	0	0	0	0	0	35.95757228	0	0	0	0	0	0	0	64.17043668	0	0	0	49.78740777	0	0
F2S4_161019_002_H01	ALM	L1	GABAergic	Lamp5	6	Lamp5 Lsp1	Core	0	0	28.09611203	0	55.66210874	54.60187809	0	0	0	0	0	0	0	0	39.22853378	0	0	21.20461285	56.19222406	0	0	0	17.4938056	0	0	0	21.20461285	0	0
F2S4_161019_006_F01	ALM	L1	GABAergic	Lamp5	6	Lamp5 Lsp1	Intermediate	0	0	0	0	0	0	0	0	0	0	0	0	0	0	164.760208	0	0	0	45.40059065	0	0	0	2.196802773	0.732267591	0	0	0	0	0
F2S4_161019_007_H01	ALM	L1	GABAergic	Lamp5	6	Lamp5 Lsp1	Core	0	0	0	0	0	47.29984928	104.4832491	0	0	0	0	2.823871599	0	0	9.177582695	0	0	0	0	0	0	0	41.65210608	0	0	0	0	0	0
F2S4_161019_009_G01	ALM	L1	GABAergic	Lamp5	6	Lamp5 Lsp1	Core	0	0	0	0	0	0	0	0	0	0	0	0	0	0	241.9173888	0	0	0	0	105.2340641	0	0	256.4324322	0	0	0	0	0	0
F2S4_161019_012_C01	ALM	L1	GABAergic	Lamp5	6	Lamp5 Lsp1	Core	0	0	0	0	0	12.12821253	0	0	0	0	0	0	0	0	85.47502166	0	0	0	5.775339301	0	0	0	30.03176437	0	0	0	0	0	0
F2S4_161019_013_A01	ALM	L1	GABAergic	Lamp5	6	Lamp5 Lsp1	Core	0	0	24.21920215	0	24.21920215	43.00996244	0	0	18.37318784	0	0	0	0	0	189.1603203	0	0	0	37.99909303	0	0	0	0	0	0	0	33.82336852	0	0
F2S4_161020_003_A01	ALM	L1	GABAergic	Lamp5	6	Lamp5 Lsp1	Intermediate	0	0	0	0	0	24.52096995	0	0	0	0	0	0	0	0	241.3379674	0	0	0	0	0	0	0	78.7252193	0	52.91367199	0	0	0	0
F2S4_161020_004_B01	ALM	L1	GABAergic	Lamp5	6	Lamp5 Lsp1	Core	0	0	0	0	0	59.04609571	36.24611816	0	0	0	0	0	0	0	186.4921241	0	0	0	0	0	0	0	25.7230516	0	0	0	0	0	0
F2S4_161020_005_G01	ALM	L1	GABAergic	Lamp5	6	Lamp5 Lsp1	Intermediate	0	0	0	0	0	0	1.222706142	0	27.5108882	0	0	0	0	0	103.9300221	0	0	0	0	94.14837294	0	0	4.890824569	0	0	0	0	0	0
F2S4_161114_003_C01	ALM	L1-L6	GABAergic	Lamp5	6	Lamp5 Lsp1	Core	0	0	0	0	0	0	0	0	0	0	0	0	0	0	71.17699608	0	0	0	103.1463248	59.11309844	0	0	0.603194882	0	0	0	0	0	0
F2S4_170119_001_B01	ALM	L1-L6	GABAergic	Lamp5	6	Lamp5 Lsp1	Core	0	0	0	0	0	8.173790034	0	0	0	0	0	0	0	0	156.3918493	0	0	0	0	0	0	0	40.86895017	0	0	0	0	0	0
F2S4_170119_001_E01	ALM	L1-L6	GABAergic	Lamp5	6	Lamp5 Lsp1	Core	0	0	0	0	0	0	69.85213573	0	0	0	0	0	0	0	146.0544656	0	0	0	0	0	0	0	17.46303393	0	0	1.587548539	0	0	0
F2S4_170119_003_D01	ALM	L1-L6	GABAergic	Lamp5	6	Lamp5 Lsp1	Core	0	0	0	0	0	0	0	0	0	0	0	0	0	0	33.92152529	0	0	14.22515577	0	24.6204619	0	0	0	0	0	1.094242751	0	0	0
F2S4_170405_001_C01	ALM	L1-L6	GABAergic	Lamp5	6	Lamp5 Lsp1	Core	5.780380233	0	0	0	0	13.66271692	0	0	0	0	0	0	0	0	43.61559631	0	0	0	0	170.2584723	0	0	37.83521607	0	0	0	0	0	0
F2S4_170405_002_H01	ALM	L1-L6	GABAergic	Lamp5	6	Lamp5 Lsp1	Core	0	0	0	0	0	0	0	0	0	0	0	0	0	0	46.48581539	0	0	0	22.17015811	1.430332781	0	0	71.51663906	0	0	0	0	0	0
F2S4_170828_017_D01	ALM	L5	GABAergic	Lamp5	6	Lamp5 Lsp1	Core	0	0	0	0	0	0	0	0	0	0	0	0	0	0	29.63250584	0	0	0	3.065431638	5.109052731	0	0	148.1625292	0	0	0	0	0	0
F2S4_170828_017_H01	ALM	L5	GABAergic	Lamp5	6	Lamp5 Lsp1	Core	0	0	0	0	0	0	0	0	0	0	0	0	0	0	89.00677342	0	0	47.84114071	0	43.39080204	0	0	53.40406405	0	0	0	0	0	0
F2S4_170828_019_E01	ALM	L5	GABAergic	Lamp5	6	Lamp5 Lsp1	Core	0.841959914	0	0	0	0	4.209799571	10.94547889	0	0	0	0	0	0	0	17.6811582	0	0	0	0	0	0	0	95.14147031	0	0	0	0	0	0
F2S4_170828_022_G01	ALM	L5	GABAergic	Lamp5	6	Lamp5 Lsp1	Core	0	0	0	0	0	38.80290748	0	0	0	0	0	0	0	0	273.9028763	0	0	0	63.91067114	78.74707694	0	0	10.27135786	0	0	0	0	0	0
F2S4_170828_024_D01	ALM	L5	GABAergic	Lamp5	6	Lamp5 Lsp1	Core	0	0	0	0	0	0	0	0	0	0	0	0	0	0	40.5897593	0	0	0	47.51971821	82.16951273	29.69982388	0	74.2495597	0	0	0	0	0	0
F2S4_171006_001_C01	ALM	L5	GABAergic	Lamp5	6	Lamp5 Lsp1	Core	0	0	0	0	0	0	0	0	0	0	0	0	0	0	332.3391483	0	0	0	0	48.15141069	0	0	80.25235116	0	0	0	0	0	0
F2S4_171006_002_B01	ALM	L5	GABAergic	Lamp5	6	Lamp5 Lsp1	Core	0	0	0	0	0	14.3382978	44.03905752	0	0	0	0	0	0	0	230.4369289	0	0	0	0	166.9387529	0	0	23.55577495	0	0	0	0	0	0
F2S4_171006_002_G01	ALM	L5	GABAergic	Lamp5	6	Lamp5 Lsp1	Core	0	0	37.96714638	0	23.15069901	33.33700658	23.15069901	0	2.778083881	0	0	0	0	0	101.8630757	0	0	0	23.15069901	0	0	0	54.63564967	0	0	0	0	0	0
F2S4_171006_003_A01	ALM	L5	GABAergic	Lamp5	6	Lamp5 Lsp1	Core	0	0	0	0	0	0	0	0	0	0	0	0	0	0	144.7598332	0	0	0	0	0	0	0	62.17249248	0	0	0	0	0	0
F2S4_171006_003_D01	ALM	L5	GABAergic	Lamp5	6	Lamp5 Lsp1	Core	0	0	0	0	0	0	0	0	0	4.034637362	0	0	0	0	134.1516923	0	0	22.19050549	0	0	0	0	123.0564395	0	0	0	0	0	0
F2S4_171006_004_B01	ALM	L5	GABAergic	Lamp5	6	Lamp5 Lsp1	Core	0	0	0	0	0	0	0	0	0	0	0	0	0	0	76.3542246	0	0	0	0	63.33929995	0	0	4.338308216	0	0	0	0	0	0
F2S4_171006_004_E01	ALM	L5	GABAergic	Lamp5	6	Lamp5 Lsp1	Core	0	0	0	0	0	0	0	0	0	0	0	0	0	0	53.36388835	0	0	0	0	66.45314399	0	0	30.20597454	0	0	0	0	0	0
F2S4_171006_005_A01	ALM	L5	GABAergic	Lamp5	6	Lamp5 Lsp1	Core	0	0	0	0	0	0	0	0	0	0	0	0	0	0	145.2791268	0	0	0	0	0	0	0	0	0	0	0	0	0	0
F2S4_171006_005_D01	ALM	L5	GABAergic	Lamp5	6	Lamp5 Lsp1	Core	0	0	0	0	0	84.91119906	0	0	0	0	0	0	0	0	131.00585	0	0	0	0	0	0	0	30.72976728	0	0	0	0	0	0
F2S4_171006_005_E01	ALM	L5	GABAergic	Lamp5	6	Lamp5 Lsp1	Core	0	0	0	0	0	0.89594415	1.791888301	0	0	0	0	0	0	0	94.07413579	0	0	0	33.14993357	0	0	0	52.86070488	0	0	0	0	0	0
F2S4_171006_006_F01	ALM	L5	GABAergic	Lamp5	6	Lamp5 Lsp1	Core	0	0	0	0	0	12.63397655	0	0	0	0	0	0	0	0	128.1446193	0	0	0	0	0	0	0	165.1441221	0	0	0	0	0	0
F2S4_171006_007_C01	ALM	L5	GABAergic	Lamp5	6	Lamp5 Lsp1	Core	0	0	0	0	0	0	45.47483617	0	0	0	0	0	0	0	255.2159173	0	0	20.41727338	0	0	0	0	54.75541499	0	0	0	0.928057881	0	0
F2S4_171006_008_C01	ALM	L5	GABAergic	Lamp5	6	Lamp5 Lsp1	Core	0	0	0	0	0	65.56592408	0	0	0	0	0	0	0	0	0.819574051	0	0	22.94807343	53.27231331	0	0	0	36.06125824	0	0	0	0	0	0
F2S4_171006_008_D01	ALM	L5	GABAergic	Lamp5	6	Lamp5 Lsp1	Core	0	0	0	0	0	14.81430272	0	0	0	0	0	0	0	0	85.92295575	0	0	0	5.925721086	54.31910996	0	0	16.78954308	0	0	0	0	0	0
F2S4_171006_008_H01	ALM	L5	GABAergic	Lamp5	6	Lamp5 Lsp1	Core	0	0	0	0	0	0	0	0	0	63.12481427	0	0	0	0	28.16337867	0	0	32.04798263	65.06711624	62.15366328	32.04798263	0	23.30762373	0	0	0	0	0	0
F2S4_171006_010_E01	ALM	L5	GABAergic	Lamp5	6	Lamp5 Lsp1	Core	0	0	0	0	0	0	0	0	0	0	0	0	0	0	34.20588341	0	0	0	0	0	0	0	4.500774133	0	0	0	0	0	0
F2S4_171006_011_B01	ALM	L5	GABAergic	Lamp5	6	Lamp5 Lsp1	Core	0	0	0	0	0	14.69564403	10.10325527	0	0	0	0	0	0	0	69.80430913	0	0	0	0	0	0	0	7.347822014	0	0	0	0	0	0
F2S4_171006_013_F01	ALM	L5	GABAergic	Lamp5	6	Lamp5 Lsp1	Core	0	0	0	0	0	0	0	0	0	0	0	0	0	0	145.5934635	0	0	0	0	166.1664529	0	0	0	0	0	71.2141941	0	0	0
F2S4_171006_014_B01	ALM	L5	GABAergic	Lamp5	6	Lamp5 Lsp1	Intermediate	0	0	28.85173095	0	0	0	0	0	0	0	0	0	0	0	152.217753	0	0	0	0	0	0	0	50.73925099	0	0	0	55.71368736	0	0
F2S4_171006_015_A01	ALM	L5	GABAergic	Lamp5	6	Lamp5 Lsp1	Core	0	0	0	0	0	0	38.91895435	0	0	50.18496745	0	0	0	0	103.4424839	0	0	0	18.43529417	0	0	0	2.048366018	0	0	0	0	0	0
F2S4_171006_015_B01	ALM	L5	GABAergic	Lamp5	6	Lamp5 Lsp1	Core	0	0	12.08268179	0	0	83.57188239	0	0	0	0	0	0	0	0	13.08957194	0	0	0	0	238.6329654	0	0	12.08268179	0	0	0	0	0	0
F2S4_171006_015_C01	ALM	L5	GABAergic	Lamp5	6	Lamp5 Lsp1	Core	0	0	0	0	0	1.63429269	31.05156112	0	0	0	0	0	0	0	111.9490493	0	0	0	0	0	0	0	49.02878071	0	0	20.42865863	0	0	0
F2S4_171006_015_H01	ALM	L5	GABAergic	Lamp5	6	Lamp5 Lsp1	Core	0	0	0	0	0	0	0	0	0	0	0	0	0	0	37.604411	0	0	0	0	123.154446	0	0	0	0	0	0	0	0	0
F2S4_171006_016_B01	ALM	L5	GABAergic	Lamp5	6	Lamp5 Lsp1	Core	0	0	0	0	0	19.25741385	0	0	3.040644292	0	0	0	0	0	203.7231676	0	0	0	0	360.8231227	0	0	4.05419239	0	0	0	0	0	0
F2S4_171006_016_E01	ALM	L5	GABAergic	Lamp5	6	Lamp5 Lsp1	Core	0	0	0	0	0	0	0	0	0	0	0	0	0	0	198.8098302	0	0	0	0	11.52520755	0	0	80.67645285	0	0	0	0	0	0
F2S4_171204_004_A01	ALM	L2/3	GABAergic	Lamp5	6	Lamp5 Lsp1	Core	0	0	0	0	0	22.57697337	0	0	20.69555892	0	0	0	0	0	47.03536118	0	0	0	0	101.5963802	0	0	3.762828895	0	0	0	0	0	0
F2S4_171204_004_C01	ALM	L2/3	GABAergic	Lamp5	6	Lamp5 Lsp1	Core	0	0	0	0	0	43.04925014	0	0	10.76231253	0	0	0	0	0	138.1163442	0	0	0	0	209.8650944	28.69950009	0	0	0	0	0	0	0	0
F1S4_160108_001_B01	VISp	L2/3	GABAergic	Lamp5	6	Lamp5 Lsp1	Core	0	0	39.27482955	0	1.570993182	8.378630303	0.523664394	0	7.331301515	0	0	0	0	0	208.4184288	0	0	0	0	0	0	0	22.51756894	0	0	0	0	0	0
F1S4_160108_001_C01	VISp	L2/3	GABAergic	Lamp5	6	Lamp5 Lsp1	Core	0	0	0	0	0	5.037892509	0	0	2.015157003	0	0	0	0	0	117.3828954	0	0	13.60230977	0	0	0	0	18.13641303	0	0	0	0	0	0
F1S4_160108_003_B01	VISp	L2/3	GABAergic	Lamp5	6	Lamp5 Lsp1	Core	0	0	69.88080954	0	49.91486396	0	0	0	0	0	0	0	0	0	119.1717377	0	0	0	69.25687374	0	0	0	177.1977671	0	0	0	0	0	0
F1S4_160108_003_C01	VISp	L2/3	GABAergic	Lamp5	6	Lamp5 Lsp1	Core	0	0	0	0	0	6.305941584	0	0	0	0	0	0	0	0	26.48495465	0	0	26.48495465	0	0	0	0	98.37268871	0	0	0	0	0	0
F1S4_160108_004_B01	VISp	L2/3	GABAergic	Lamp5	6	Lamp5 Lsp1	Core	0	0	0	0	0	35.3604879	11.29571141	0	0	0	0	0	0	0	172.8734964	0	0	0	0	0	0	0	43.70949198	0	0	0	0	0	0
F1S4_160108_007_A01	VISp	L1	GABAergic	Lamp5	6	Lamp5 Lsp1	Core	0	0	0	0	0	51.40370183	0	0	0	0	0	0	0	0	70.44210991	0	0	0	220.2109202	24.11531691	0	0	18.40379448	0	0	0	0	0	0
F1S4_160108_007_B01	VISp	L1	GABAergic	Lamp5	6	Lamp5 Lsp1	Core	0	0	0	0.666786688	0	106.6858701	0	0	0	0	0	0	0	0	0.666786688	0	0	0	0	0	0	0	65.34509545	0	0	0	0	0	0
F1S4_160108_008_C01	VISp	L4	GABAergic	Lamp5	6	Lamp5 Lsp1	Core	0	1.621089729	108.6130118	0	70.24722159	22.15489296	0	0	0	0	0	0	0	0	65.92431564	0	0	0	0	0	0	0	86.99848212	38.90615349	0	0	0	0	0
F1S4_160108_010_A01	VISp	L4	GABAergic	Lamp5	6	Lamp5 Lsp1	Core	0	0	0	0	0	0	43.56092069	0	0	0	0	0	0	0	101.8882552	0	0	0	71.61710689	0	0	0	56.11237241	0	0	0	0	0	0
F1S4_160108_010_C01	VISp	L4	GABAergic	Lamp5	6	Lamp5 Lsp1	Core	0	0	0	0	0	21.25595439	27.79624805	0	0	0	0	0	0	0	67.58303448	0	0	0	0	0	0	0	56.68254505	0	0	0	0	0	0
F1S4_160108_011_F01	VISp	L5	GABAergic	Lamp5	6	Lamp5 Lsp1	Core	0	0	0	0	0	26.18196705	0	0	0	0	0	0	0	0	119.0089411	0	0	0	0	0	0	0	135.0751482	0	0	0	0	0	0
F1S4_160108_012_G01	VISp	L5	GABAergic	Lamp5	6	Lamp5 Lsp1	Core	0	0	0	0	0	0	0	0	18.3881282	0	0	0	0	0	55.16438461	0	0	0	0	43.08075751	0	0	43.6061326	0	0	0	0	0	0
F1S4_160108_013_E01	VISp	L5	GABAergic	Lamp5	6	Lamp5 Lsp1	Core	0	0	0	0	0	15.77174624	0	0	21.44957489	0	0	0	0	0	0	0	0	0	0	0	0	0	117.341792	0	0	0	0	0	0
F1S4_160108_013_G01	VISp	L5	GABAergic	Lamp5	6	Lamp5 Lsp1	Core	0.562033617	0	0	0	0	10.11660511	0	0	10.67863873	0	0	0	0	0	16.29897491	0	0	7.868470645	39.90438684	70.25420218	0	0	78.68470645	0	0	0	0	0	0
F1S4_170426_009_C01	VISp	L2/3	GABAergic	Lamp5	6	Lamp5 Lsp1	Core	0	0	0	0	0	106.7620186	28.76489621	0	0	0	0	0	0	0	58.63613457	0	0	0	0	56.97662133	0	0	0	0	0	0	0	0	0
F1S4_170426_010_F01	VISp	L2/3	GABAergic	Lamp5	6	Lamp5 Lsp1	Core	0	0	26.43979559	0	0	0	0	0	0	0	0	0	0	0	58.16755031	0	0	0	0	0	0	0	8.592933568	0	0	0	0	0	0
F1S4_170426_010_H01	VISp	L2/3	GABAergic	Lamp5	6	Lamp5 Lsp1	Core	0	0	0	0	0	6.846053229	7.701809883	0	0	0	0	0	0	0	11.55271482	0	0	35.94177945	0	0	0	0	0	0	0	0	0	0	0
F1S4_170426_011_C01	VISp	L2/3	GABAergic	Lamp5	6	Lamp5 Lsp1	Core	0	0	66.23263309	0.547377133	0	0	0	0	0	0	0	0	0	0	0	0	0	0	0	0	0	0	21.34770819	0	0	0	0	0	0
F1S4_170426_011_F01	VISp	L2/3	GABAergic	Lamp5	6	Lamp5 Lsp1	Core	0	0	0	0	0	0	0	0	0	0	0	0	0	0	84.91977259	0	0	0	0	0	0	0	45.18167388	0	0	0	0	0	0
F1S4_170426_012_F01	VISp	L2/3	GABAergic	Lamp5	6	Lamp5 Lsp1	Core	0	0	28.92461883	0	0	1.506490564	0	0	0	0	0	0	0	0	52.42587163	0	0	0	0	7.833750933	0	0	8.436347158	0	0	0	0	0	0
F1S4_170426_014_G01	VISp	L2/3	GABAergic	Lamp5	6	Lamp5 Lsp1	Core	0	0	0	0	0	39.76068611	210.1636266	0	0	0.568009802	0	0	0	0	34.08058809	0	0	0	0	0	0	0	67.02515659	0	0	0	0	0	0
F1S4_170426_016_A01	VISp	L2/3	GABAergic	Lamp5	6	Lamp5 Lsp1	Core	0	0	0	0	0	26.55459918	125.3377081	0	0	0.531091984	0	0	0	0	21.24367934	0	0	0	6.904195786	0	0	0	21.77477133	0	0	0	0	0	0
F1S4_170426_017_C01	VISp	L2/3	GABAergic	Lamp5	6	Lamp5 Lsp1	Core	0	0	0	0	0	45.09896991	27.68451618	0	0	0	0	0	0	0	175.4841107	0	0	0	0	0	0	0	35.72195637	0	0	0	0	0	0
F1S4_180108_301_A01	VISp	L1-L4	GABAergic	Lamp5	6	Lamp5 Lsp1	Intermediate	0	0	0	0	0	40.10804104	285.7697924	0	0	0	0	0	0	0	46.37492245	0	0	0	96.50997374	0	0	0	57.65530899	0	0	0	0	0	0
F1S4_180108_302_B01	VISp	L1-L4	GABAergic	Lamp5	6	Lamp5 Lsp1	Core	0	0	0	0	0	0	0	0	0	0	0	0	0	0	85.56060697	0	0	0	0	38.15540581	0	0	121.4035639	0	0	0	197.7143756	0	0
F1S4_180108_302_D01	VISp	L1-L4	GABAergic	Lamp5	6	Lamp5 Lsp1	Core	0	0	0	0	0	0	35.12622427	0	16.95748758	0	0	0	0	0	140.5048971	0	0	0	0	10.90124201	0	0	87.20993612	0	0	0	0	0	0
F1S4_180108_302_E01	VISp	L1-L4	GABAergic	Lamp5	6	Lamp5 Lsp1	Core	0	0	0	0	0	22.69002226	0	0	0	0	0	0	0	0	36.03709418	57.39240925	0	0	112.1154041	53.38828768	0	0	69.40477398	0	0	0	0	0	0
F1S4_180108_304_C01	VISp	L1-L4	GABAergic	Lamp5	6	Lamp5 Lsp1	Core	0	0	0	0	0	0	81.86110529	0	0	0	0	0	0	0	195.6341669	0	0	0	0	0	0	0	0	0	0	0	0	0	0
F1S4_180108_304_E01	VISp	L1-L4	GABAergic	Lamp5	6	Lamp5 Lsp1	Core	0	0	0	0	0	0	86.0680158	0	0	0	0	0	0	0	70.6199104	0	0	0	0	0	0	0	1.1034361	0	0	0	0	0	0
F1S4_180124_301_B01	VISp	L1-L4	GABAergic	Lamp5	6	Lamp5 Lsp1	Core	0	0	0	0	0	20.35508111	38.94015518	0	0	0	0	0	0	0	53.98521513	0	0	28.32011286	35.40014107	0	0	0	55.75522218	0	0	0	0	0	0
F1S4_180124_301_E01	VISp	L1-L4	GABAergic	Lamp5	6	Lamp5 Lsp1	Core	0	0	138.6144178	0	66.49745717	16.85851027	0	0	0	0	0	0	0	0	57.13161814	0	0	33.71702054	0	0	0	0	47.7657791	0	0	0	0	0	0
F1S4_180124_302_B01	VISp	L1-L4	GABAergic	Lamp5	6	Lamp5 Lsp1	Core	0	0	0	0	0	39.29867747	43.47938784	0	0	0	0	0	0	0	69.39979214	0	0	0	4.18071037	0	0	0	32.60954088	0	0	0	0	0	0
F1S4_180124_302_F01	VISp	L1-L4	GABAergic	Lamp5	6	Lamp5 Lsp1	Core	0	0	0	0	0	24.14122244	0	0	0	0	0	0	0	0	27.85525666	0	0	0	2.785525666	0	0	0	16.713154	0	0	0	0	0	0
F1S4_180124_303_G01	VISp	L1-L4	GABAergic	Lamp5	6	Lamp5 Lsp1	Core	0	0	0	0	0	0	0	0	7.966467998	0	0	0	0	0	12.51873543	0	0	0	0	0	0	0	71.69821198	0	0	0	0	0	0
F1S4_180124_307_B01	VISp	L1-L4	GABAergic	Lamp5	6	Lamp5 Lsp1	Core	0	0	0	0	0	0	106.0928745	0	0	0	0	0	0	0	28.48790148	0	0	38.31131579	0	0	0	0	1.964682861	0	0	0	0	0	0
F1S4_180124_308_A01	VISp	L5-L6	GABAergic	Lamp5	6	Lamp5 Lsp1	Core	0	0	62.72085074	0	0	0	0	0	0	0	0	0	0	0	97.11615598	0	0	0	0	33.38367862	0	0	36.41855849	0	0	0	0	0	0
F1S4_180124_309_A01	VISp	L5-L6	GABAergic	Lamp5	6	Lamp5 Lsp1	Core	0	0	0	0	0	0	0	0	0	0	0	0	0	0	123.3792257	0	0	0	0	35.00119879	0	0	53.37682816	0	0	0	0	0	0
F1S4_180124_309_F01	VISp	L5-L6	GABAergic	Lamp5	6	Lamp5 Lsp1	Core	0	0	0	0	0	0.850301092	0	0	0	0	0	0	0	0	28.05993602	0	0	0	0	0	0	0	75.67679715	0	0	0	0	0	0
F1S4_180124_310_A01	VISp	L5-L6	GABAergic	Lamp5	6	Lamp5 Lsp1	Core	0	0	0	0	0	18.2606623	0	0	0	0	0	0	0	0	72.08156173	0	0	54.78198691	0	0	42.28784955	0	90.34222403	0	0	0	0	0	0
F1S4_180124_310_C01	VISp	L5-L6	GABAergic	Lamp5	6	Lamp5 Lsp1	Core	0	0	0	0	0	0	22.00688816	0	1.000313098	0	0	0	0	0	0	0	0	0	0	0	0	0	71.02222996	0	0	0	0	0	0
F1S4_180124_310_D01	VISp	L5-L6	GABAergic	Lamp5	6	Lamp5 Lsp1	Core	0	0	0	0	0	0.96724053	0	0	17.41032955	0	0	0	0	0	32.88617804	0	0	0	0	0	0	0	32.88617804	0	0	0	0	0	0
F1S4_180124_310_E01	VISp	L5-L6	GABAergic	Lamp5	6	Lamp5 Lsp1	Core	0	0	0	0	0	0	0	0	12.85242418	0	0	0	0	0	55.69383812	0	0	72.83040369	0	49.26762603	55.69383812	0	2.142070697	0	0	0	0	0	0
F1S4_180124_310_G01	VISp	L1-L4	GABAergic	Lamp5	6	Lamp5 Lsp1	Core	0	0	0	0	0	12.34073334	77.84154878	0	0	0	0	0	0	0	23.73217951	0	0	0	0	0	0	0	49.36293337	0	0	0	0	0	0
F1S4_180124_311_H01	VISp	L1-L4	GABAergic	Lamp5	6	Lamp5 Lsp1	Core	0	0	0	0	0	0	0	0	0	0	0	0	0	0	35.64290199	0	0	0	0	0	0	0	17.36449071	0	0	0	0	0	0
F1S4_180124_312_D01	VISp	L1-L4	GABAergic	Lamp5	6	Lamp5 Lsp1	Core	0	0	0	0	0	54.08944686	0	0	0	0	0	0	0	0	44.60007022	0	0	0	0	0	0	0	295.1196136	0	0	0	0	0	0
F1S4_180124_312_F01	VISp	L1-L4	GABAergic	Lamp5	6	Lamp5 Lsp1	Core	0	0	0	0	0	107.4022398	0	0	0	0	0	0	0	0	42.57386081	0	0	0	0	34.83315885	0	0	132.5595212	0	0	0	0	0	0
F1S4_180124_313_C01	VISp	L1-L4	GABAergic	Lamp5	6	Lamp5 Lsp1	Core	0	0	0	0	0	0	94.60993675	0	26.06600298	0	0	0	0	0	128.3991999	0	0	44.40874582	0	0	0	0	62.75148866	0	0	0	0	0	0
F1S4_180124_313_G01	VISp	L1-L4	GABAergic	Lamp5	6	Lamp5 Lsp1	Core	0	0	0	0	0	30.78561563	0	0	0	0	0	0	0	0	56.57896926	0	0	42.43422695	0	0	0	0	0	0	0	0	0	0	0
F1S4_180124_314_B01	VISp	L1-L4	GABAergic	Lamp5	6	Lamp5 Lsp1	Core	0	0	0	0	0	7.437291239	0	0	0	0	0	0	0	0	47.92921021	0	0	0	0	0	0	0	0	0	0	0	0	0	0
F1S4_180130_330_C01	VISp	L1-L4	GABAergic	Lamp5	6	Lamp5 Lsp1	Core	0	0	0	0	0	13.11377952	0	0	17.48503936	0	0	7.285433068	0	0	2.914173227	0	0	27.68464566	39.34133857	0	0	0	83.05393698	0	0	0	0	0	0
F1S4_180130_331_A01	VISp	L1-L4	GABAergic	Lamp5	6	Lamp5 Lsp1	Core	0	0	0	0	0	0	67.96044386	0	0	0	0	0	0	0	55.31664035	0	0	0	0	11.06332807	0	0	34.77045965	0	0	0	0	0	0
F1S4_180130_332_C01	VISp	L1-L4	GABAergic	Lamp5	6	Lamp5 Lsp1	Core	0	0	59.89817311	0	49.91514425	0	0	0	0	0	0	0	0	0	249.5757213	0	0	0	0	0	0	0	89.84725966	0	0	0	149.7454328	0	0
F1S4_180130_354_A01	VISp	L5-L6	GABAergic	Lamp5	6	Lamp5 Lsp1	Core	0	0	0	0	80.00654599	0	56.36824831	0	0	0	0	0	0	0	123.6464802	0	0	0	0	0	67.27823186	0	27.27495886	0	0	0	0	0	0
F1S4_180130_354_E01	VISp	L5-L6	GABAergic	Lamp5	6	Lamp5 Lsp1	Core	0	0	0	0	0	0	28.41776963	0	0	0	0	0	0	0	51.50720746	0	0	17.76110602	17.76110602	0	0	0	3.552221204	0	0	0	0	0	0
F1S4_180130_356_E01	VISp	L5-L6	GABAergic	Lamp5	6	Lamp5 Lsp1	Core	0	0	0	0	0	0	0	0	0	0	0	0	0	0	14.44986939	0	0	0	0	0	0	0	73.85488799	0	0	0	0	0	0
F1S4_180130_356_H01	VISp	L5-L6	GABAergic	Lamp5	6	Lamp5 Lsp1	Core	0	0	0	0	0	30.56800447	0	0	0	0	0	0	0	0	0	0	0	0	0	0	0	0	117.1773505	0	0	0	0	0	0
F2S4_151217_006_H01	VISp	L2/3	GABAergic	Lamp5	6	Lamp5 Lsp1	Core	0	0	2.350539018	0	0	10.96918208	77.56778759	0	0	0	0	40.74267631	0	0	74.43373556	0	0	0	10.96918208	0	0	0	102.6402038	0	0	0	0	0	0
F2S4_151217_013_E01	VISp	L5	GABAergic	Lamp5	6	Lamp5 Lsp1	Core	0	0	45.43286159	0	77.78656605	11.01402705	33.04208116	0	0	0	0	0	0	0	113.582154	0	0	11.70240374	0	0	0	0	147.3126118	0	0	0	0	0	0
F2S4_151223_001_F01	VISp	L2/3	GABAergic	Lamp5	6	Lamp5 Lsp1	Core	3.383940158	0	0	0	0	0	0	0	0	0	0	0	0	0	129.4357111	0	0	0	0	0	0	0	120.9758607	0	0	0	0	0	0
F2S4_151223_001_H01	VISp	L2/3	GABAergic	Lamp5	6	Lamp5 Lsp1	Core	0	0	0	0	0	18.8832449	0	0	0	0	0	0	0	0	31.15735408	0	0	0	0	0	0	0	106.6903337	0	0	0	0	0	0
F2S4_151223_002_C01	VISp	L2/3	GABAergic	Lamp5	6	Lamp5 Lsp1	Core	0	0	26.26108349	0	0	0.52522167	0	0	0	0	0	0	0	0	115.5487674	0	0	0	0	0	0	0	169.6465993	0	0	0	0	0	0
F2S4_151223_003_A01	VISp	L2/3	GABAergic	Lamp5	6	Lamp5 Lsp1	Core	0	0	0	0	0	39.15377902	0	0	30.07464186	0	0	0	0	0	85.68435699	0	0	0	0	0	0	0	28.93974971	0	0	0	0	0	0
F2S4_151223_004_A01	VISp	L2/3	GABAergic	Lamp5	6	Lamp5 Lsp1	Core	0	0	12.06098032	0	97.19731196	0	73.78482076	0	0	0	0	0	0	0	56.75755443	0	0	0	0	0	0	0	30.50718551	0	0	0	95.7783731	0	0
F2S4_151223_004_G01	VISp	L2/3	GABAergic	Lamp5	6	Lamp5 Lsp1	Core	0	0	0	0	0	0	0	0	0	0	0	0	0	0	246.4161749	0	0	43.94683375	0	0	0	0	32.96012531	0	0	0	0	0	0
F2S4_151223_005_E01	VISp	L4	GABAergic	Lamp5	6	Lamp5 Lsp1	Core	0	0	0	0	2.78388105	0	34.10254287	0	0	0	0	0	0	0	119.7068852	0	0	0	0	0	0	0	84.90837204	0	0	0	0	0	0
F2S4_151223_006_C01	VISp	L4	GABAergic	Lamp5	6	Lamp5 Lsp1	Core	0	0	0	0	0	0	0	0	0	0	0	0	0	0	75.38697074	0	0	38.94993488	0	0	0	0	11.93627037	0	25.12899025	0	0	0	0
F2S4_151223_006_D01	VISp	L4	GABAergic	Lamp5	6	Lamp5 Lsp1	Core	0	0	0	0	0	6.678558954	65.44987775	0	0	0	0	0	0	0	259.7959433	0	0	0	0	0	0	0	126.8926201	0	0	0	0	0	0
F2S4_151223_010_G01	VISp	L5	GABAergic	Lamp5	6	Lamp5 Lsp1	Core	0	0	0	0	0	2.125010094	0	0	0	0	0	0	0	0	144.5006864	0	0	0	78.62537347	0	0	0	343.1891301	0	0	0	0	0	0
F2S4_151223_011_E01	VISp	L5	GABAergic	Lamp5	6	Lamp5 Lsp1	Core	1.206031848	0	0	0	0	0	0	0	0	0	0	0	0	0	87.43730896	0	0	0	0	0	0	0	15.0753981	0	0	0	0	0	0
F2S4_151223_011_F01	VISp	L5	GABAergic	Lamp5	6	Lamp5 Lsp1	Core	0	0	0	0	0	0	0	0	5.445309644	0	0	0	0	0	45.1182799	0	0	0	0	0	0	0	113.5736011	0	0	0	0	0	0
F2S4_151223_014_A01	VISp	L6	GABAergic	Lamp5	6	Lamp5 Lsp1	Core	0	0	0	0	0	0.695525891	0	0	0	0	0	0	0	0	0	0	0	0	0	0	0	0	125.1946603	0	0	0	0	0	0
F2S4_151223_014_E01	VISp	L1	GABAergic	Lamp5	6	Lamp5 Lsp1	Intermediate	0	0	15.8903355	0	79.45167749	0	0	0	0	0	0	0	0	0	121.8259055	0	0	0	0	0	0	0	211.87114	0	0	0	0	0	0
F2S4_151223_014_H01	VISp	L1	GABAergic	Lamp5	6	Lamp5 Lsp1	Core	0	0	0	0	0	7.597244733	168.8276607	0	0	0	0	0	0	0	0	0	0	0	0	0	0	0	2.532414911	0	0	0	0	0	0
F2S4_151223_015_B01	VISp	L1	GABAergic	Lamp5	6	Lamp5 Lsp1	Core	0	0	0	0	0	3.838575121	0	0	0	0	0	0	0	0	30.06883845	0	0	0	182.9720808	0	0	0	2.559050081	0	0	0	0	0	0
F2S4_151223_016_C01	VISp	L1	GABAergic	Lamp5	6	Lamp5 Lsp1	Intermediate	0	0	0	0	0	0	106.972192	0	47.89799643	0	0	0	0	0	128.5262904	0	0	0	0	0	0	0	167.6429875	0	0	0	0	0	0
F2S4_151223_016_G01	VISp	L1	GABAergic	Lamp5	6	Lamp5 Lsp1	Intermediate	0	0	0	0	0	0.75060818	0	0	0	0	0	0	0	0	30.77493539	0	0	0	0	0	0	0	63.05108714	0	0	0	119.3467007	0	0
F2S4_151223_016_H01	VISp	L1	GABAergic	Lamp5	6	Lamp5 Lsp1	Core	0	0	0	0	0	67.800742	0	11.42709135	21.33057052	14.47431571	0	0	0	0	230.0654391	0	0	0	0	0	0	0	42.66114103	0	0	46.47017148	0	0	0
F2S4_151223_017_A01	VISp	L1	GABAergic	Lamp5	6	Lamp5 Lsp1	Core	0	0	0	0	0	41.02323943	47.93726855	0	34.57014559	0	0	0	0	0	51.16381547	0	0	0	98.17921348	0	0	0	152.1086406	0	0	0	0	0	0
F2S4_151223_017_C01	VISp	L1	GABAergic	Lamp5	6	Lamp5 Lsp1	Intermediate	0	0	0	0	0	41.53794231	6.922990386	0	0	0	0	0	0	0	134.1329387	0	0	0	0	0	0	0	298.5539604	0	0	0	0	0	0
F2S4_151223_017_H01	VISp	L1	GABAergic	Lamp5	6	Lamp5 Lsp1	Core	0	0	0	0	0.867718863	30.37016019	39.04734882	0	4.338594313	0	0	0	0	0	95.44907488	0	0	0	0.867718863	81.56557308	0	0	111.0680144	0	0	0	0	0	0
F2S4_151223_018_E01	VISp	L1	GABAergic	Lamp5	6	Lamp5 Lsp1	Core	0	0	0	0	0	0	0	0	11.50376221	84.36092287	0	0	0	0	63.27069215	0	0	0	0	0	0	0	64.229339	0	0	0	0	0	0
F2S4_160113_004_H01	VISp	L2/3	GABAergic	Lamp5	6	Lamp5 Lsp1	Core	0	0	0	0	0	18.29796743	0	0	0	0	0	0	0	0	26.06074149	0	0	0	0	46.0221605	0	0	120.3229979	0	0	0	0	0	0
F2S4_160113_005_G01	VISp	L2/3	GABAergic	Lamp5	6	Lamp5 Lsp1	Core	0	0	0	0	0	0	41.47125909	0	69.70700997	0	0	0	0	0	61.76570503	0	0	0	0	0	0	0	47.6478296	0	0	0	0	0	0
F2S4_160113_016_G01	VISp	L5	GABAergic	Lamp5	6	Lamp5 Lsp1	Core	0	0	0	0	0	42.58811589	1.443664946	0	12.99298451	0	0	0	0	0	124.8770178	0	0	0	13.71481698	135.7045049	0	0	23.09863913	0	0	0	0	0	0
F2S4_160114_006_C01	VISp	L6	GABAergic	Lamp5	6	Lamp5 Lsp1	Core	0	0	0	0	0	0	0	0	0	0	0	0	0	0	244.51195	0	0	60.09191992	153.3380025	0	0	0	159.5544081	0	0	0	0	0	0
F2S4_160114_007_G01	VISp	L6	GABAergic	Lamp5	6	Lamp5 Lsp1	Core	0	0	0	0	0	0	0	0	0	74.37331791	0	0	0	0	183.5005227	0	0	0	0	0	0	0	73.67824017	0	0	0	0	0	0
F2S4_160114_008_B01	VISp	L6	GABAergic	Lamp5	6	Lamp5 Lsp1	Core	0	0	0	0	0	0.586924037	8.216936515	0	0	0	0	0	0	0	4.695392294	0	0	25.82465762	65.14856808	0	0	0	0.586924037	0	0	0	0	0	0
F2S4_160114_010_A01	VISp	L1	GABAergic	Lamp5	6	Lamp5 Lsp1	Core	0	0	0.70248349	0	3.512417449	2.10745047	1.40496698	0	0	0	0	0	0	0	54.09122872	0	0	0	0.70248349	7.727318389	0	0	75.16573342	0	0	0	0	0	0
F2S4_160114_010_B01	VISp	L1	GABAergic	Lamp5	6	Lamp5 Lsp1	Core	0	0	0	0	0	2.435626394	73.06879183	0	0	110.2120943	0	0	0	0	24.96517054	0	0	21.31173095	0	0	0	0	40.79674211	0	0	0	0	0	0
F2S4_160114_010_H01	VISp	L1	GABAergic	Lamp5	6	Lamp5 Lsp1	Core	0	0	0	0	0	37.50935309	0	0	52.38375172	1.940138953	0	0	0	0	66.61143738	0	0	20.04810251	33.62907518	0	0	0	73.07856722	0	22.63495445	0	0	0	0
F2S4_160114_011_G01	VISp	L1	GABAergic	Lamp5	6	Lamp5 Lsp1	Core	0	0	0	0	0	7.70890693	0	0	0	0	0	0	0	0	14.23182818	0	0	0	0	29.0566492	0	0	49.81139863	0	0	0	0	0	0
F2S4_160114_012_B01	VISp	L1	GABAergic	Lamp5	6	Lamp5 Lsp1	Core	0	0	0	0	0	36.87446831	0	0	41.40291179	62.75128818	0	0	0	0	43.99059378	0	0	0	20.70145589	0	0	0	114.5049279	0.646920497	0	0	0	0	0
F2S4_160114_012_D01	VISp	L1	GABAergic	Lamp5	6	Lamp5 Lsp1	Core	0	0	0	0	0	0	0	0	0	0	0	0	0	0	59.56660592	0	0	0	64.79174679	0	0	0	327.6163325	0	0	0	0	0	0
F2S4_160114_014_C01	VISp	L1	GABAergic	Lamp5	6	Lamp5 Lsp1	Core	0	0	0	0	0	0	21.24398481	0	70.81328268	0	0	0	0	0	0	0	0	0	0	0	0	0	37.7670841	0	0	0	0	0	0
F2S4_160114_016_E01	VISp	L4	GABAergic	Lamp5	6	Lamp5 Lsp1	Core	0	0	0	0	0	1.769531499	40.10938064	0	0	0	0	0	0	0	146.8711144	0	0	0	24.77344098	27.13281632	0	0	1.769531499	0	0	0	0	0	0
F2S4_160114_017_F01	VISp	L2/3	GABAergic	Lamp5	6	Lamp5 Lsp1	Core	0	0	0	0	0	0	0	0	0	0	0	0	0	0	63.15655466	0	0	0	138.745502	0	0	0	106.9185768	0	0	0	0	0	0
F2S4_160114_018_H01	VISp	L2/3	GABAergic	Lamp5	6	Lamp5 Lsp1	Core	0	0	93.77763541	0	0	0	0	0	0	0	0	0	0	0	71.59367865	0	0	25.20904178	0	0	0	0	83.02177759	0	0	0	0	0	0
F2S4_160114_019_F01	VISp	L2/3	GABAergic	Lamp5	6	Lamp5 Lsp1	Core	0	0	7.747793816	0	0	68.277433	22.75914433	0	0	0	0	0	0	0	165.6090928	0	0	0	0	0	0	0	23.24338145	0	0	0	0	0	0
F2S4_160114_019_G01	VISp	L2/3	GABAergic	Lamp5	6	Lamp5 Lsp1	Core	0	0	0	0	0	18.78702218	0	0	0	0	0	0	0	0	132.7616234	0	0	0	0.626234073	0	0	0	28.80676734	0	0	0	0	0	0
F2S4_160114_020_B01	VISp	L2/3	GABAergic	Lamp5	6	Lamp5 Lsp1	Core	0	0	54.44037843	0	52.7391166	134.3996842	0	0	0	0	0	0	0	0	0	0	0	0	37.42776017	6.805047304	0	0	64.64794938	0	0	0	324.0903778	0	0
F2S4_160114_020_D01	VISp	L2/3	GABAergic	Lamp5	6	Lamp5 Lsp1	Core	0	0	0	0	0	0	77.31130278	0	0	0	0	0	0	0	164.7951454	0	0	0	0	0	0	0	99.69089042	0	0	0	0	0	0
F2S4_160114_021_A01	VISp	L2/3	GABAergic	Lamp5	6	Lamp5 Lsp1	Core	0	0	0	0	0	41.93089788	36.93912432	0	31.44817341	41.43172052	0	0	0	0	1.497532067	0	0	0	0	0	0	0	68.38729773	0	0	0	0	0	0
F2S4_160114_021_G01	VISp	L2/3	GABAergic	Lamp5	6	Lamp5 Lsp1	Core	0	0	0	0	0	0	59.70013094	0	28.1730955	0	0	0	0	0	48.29673514	0	0	0	0	0	0	0	11.4033958	0	0	0	0	0	0
F2S4_160115_007_C01	VISp	L2/3	GABAergic	Lamp5	6	Lamp5 Lsp1	Core	0	0	0	0	0	23.7116146	21.93324351	0	0	0	0	0	0	0	69.94926307	0	0	0	49.2016003	0	0	0	103.7383139	0	0	0	0	0	0
F2S4_160115_007_H01	VISp	L2/3	GABAergic	Lamp5	6	Lamp5 Lsp1	Core	0	0	0	0	0	5.928128555	0	0	0.592812856	0	0	0	0	0	68.76629124	0	0	0	49.20346701	0	0	0	11.85625711	0	0	0	0	0	0
F2S4_160115_008_C01	VISp	L2/3	GABAergic	Lamp5	6	Lamp5 Lsp1	Core	0	0	0	0	0	3.315030681	0	0	0	0	0	0	0	0	75.69320054	0	0	0	0	0	0	0	8.840081815	0	0	0	0	0	0
F2S4_160115_008_H01	VISp	L2/3	GABAergic	Lamp5	6	Lamp5 Lsp1	Core	0	0	0	0	0	0	0	0	0	0	0	0	0	0	81.34846871	0	0	0	0	110.2385791	0	0	0.760266063	0	0	0	0	0	0
F2S4_160115_009_E01	VISp	L2/3	GABAergic	Lamp5	6	Lamp5 Lsp1	Core	0	0	0	0.452142931	0	65.10858212	0	0	0	0	0	0	0	0	61.49143867	0	0	0	0	22.15500364	0	0	134.7385936	0	0	0	0	0	0
F2S4_160115_010_C01	VISp	L2/3	GABAergic	Lamp5	6	Lamp5 Lsp1	Core	0	0	0	0	0	23.97574853	0	0	10.98888474	0	0	0	0	0	33.96564375	0	0	0	0	0	0	0	50.94846563	0	0	0	0	0	0
F2S4_160115_010_G01	VISp	L2/3	GABAergic	Lamp5	6	Lamp5 Lsp1	Core	0	0	0.49789019	0	0	27.88185066	2.987341142	0	16.43037628	0	0	0	0	0	50.28690922	0	0	0	63.23205417	0	0	0	37.83965446	0	0	0	0	0	0
F2S4_160115_014_E01	VISp	L4	GABAergic	Lamp5	6	Lamp5 Lsp1	Core	0	0	0	0	0	0	0	0	0	0	0	0	0	0	45.41494215	0	0	0	26.61257757	0	0	0	58.72123094	0	0	0	0	0	0
F2S4_160115_015_E01	VISp	L5	GABAergic	Lamp5	6	Lamp5 Lsp1	Core	20.29427935	0	22.754192	0	31.97886443	14.75947589	0	0	0	0	0	0	0	0	17.8343667	0	0	0	0	0	19.06432303	0	90.40178983	62.72777254	0	0	0	0	0
F2S4_160115_017_C01	VISp	L5	GABAergic	Lamp5	6	Lamp5 Lsp1	Core	0	0	0	0	0	1.517180169	0	0	45.51540507	0	0	0	0	0	113.7885127	0	0	0	21.24052237	0	0	0	18.20616203	0	0	0	0	0	0
F2S4_160115_018_D01	VISp	L5	GABAergic	Lamp5	6	Lamp5 Lsp1	Core	0	0	0	0	0	27.48630187	0	0	15.1648562	0	0	0	0	0	0	0	0	0	0	0	0	0	1.895607025	0	0	0	0	0	0
F2S4_160115_019_D01	VISp	L5	GABAergic	Lamp5	6	Lamp5 Lsp1	Core	0	0	0	0	0	8.786658338	0	0	0	0	0	31.95148487	0	0	104.6411129	0	0	0	0	0	0	0	162.9525728	0	0	0	0	0	0
F2S4_160115_020_A01	VISp	L6	GABAergic	Lamp5	6	Lamp5 Lsp1	Core	0	0	0	0	0	0	0	0	0	87.74647636	0	0	0	0	65.22746915	0	0	0	0	0	0	0	239.1673869	0	0	0	0	0	0
F2S4_160115_021_G01	VISp	L6	GABAergic	Lamp5	6	Lamp5 Lsp1	Core	0	0	0	0	0	0	27.42495357	0	15.67140204	0	0	0	0	0	63.2453011	0	0	0	0	94.58810518	0	0	74.4391597	0	0	0	0	0	0
F2S4_160115_023_A01	VISp	L6	GABAergic	Lamp5	6	Lamp5 Lsp1	Core	0	0	0	0	0	0	0	0	4.540621535	0	0	0	0	0	51.4603774	0	0	0	71.89317431	0	43.89267484	0	6.054162047	0	0	3.027081024	0	0	0
F2S4_160115_025_B01	VISp	L1	GABAergic	Lamp5	6	Lamp5 Lsp1	Core	0	0	0	0	0	0	26.47075284	0	0	0	0	0	0	0	21.17660227	0	0	0	0	0	0	0	77.14333686	0	0	0	0	0	0
F2S4_160115_025_E01	VISp	L1	GABAergic	Lamp5	6	Lamp5 Lsp1	Core	0	0	0	0	0	43.30219318	0	0	19.78001417	0	0	0	0	0	322.8953664	0	0	0	0	0	0	0	0	0	0	0	0	0	0
F2S4_160115_026_C01	VISp	L1	GABAergic	Lamp5	6	Lamp5 Lsp1	Core	0	0	0	0	0	3.45235917	66.97576789	0	0	0	0	0	0	0	162.9513528	0	0	0	117.3802118	72.49954256	0	0	72.49954256	0	0	0	0	0	0
F2S4_160115_026_E01	VISp	L1	GABAergic	Lamp5	6	Lamp5 Lsp1	Core	0	0	0	0	0	86.16975442	0	0	10.50850664	33.62722124	0	0	0	0	40.63289233	0	0	0	0	33.62722124	0	0	14.71190929	0	3.502835545	0	0	0	0
F2S4_160115_027_D01	VISp	L1	GABAergic	Lamp5	6	Lamp5 Lsp1	Core	0	0	0	0	0	92.64931885	0	0	12.73928134	0	0	0	0	0	154.0294926	0	0	0	0	34.74349457	0	0	52.11524186	0	0	0	0	0	0
F2S4_160115_027_G01	VISp	L1	GABAergic	Lamp5	6	Lamp5 Lsp1	Core	0	0	0	0	0	0	69.3004535	0	2.77201814	0	0	0	0	0	72.07247164	0	0	0	157.0810279	0	0	0	0	0	0	0	0	0	0
F2S4_160115_029_B01	VISp	L1	GABAergic	Lamp5	6	Lamp5 Lsp1	Core	0	0	0	0	0	1.421691457	0	0	0	0	0	0	0	0	68.95203568	0	0	0	0	0	0	0	34.12059498	0	0	0	0	0	0
F2S4_160115_029_F01	VISp	L1	GABAergic	Lamp5	6	Lamp5 Lsp1	Core	0	0	0	0	0	0	54.64905063	0	1.242023878	0	0	0	0	0	0	0	0	0	0.621011939	0	0	0	42.84982379	0	0	0	0	0	0
F2S4_160119_002_F01	VISp	L2/3	GABAergic	Lamp5	6	Lamp5 Lsp1	Core	0	0	0	0	0	18.70325522	0	0	0	0	0	0	0	0	127.1821355	0	0	0	0	0	0	0	63.59106775	0	0	0	0	0	0
F2S4_160119_002_G01	VISp	L2/3	GABAergic	Lamp5	6	Lamp5 Lsp1	Core	0	0	0	0	0	4.33734574	0	0	0.542168217	0	0	0	0	0	71.5662047	0	0	0	30.36142018	37.95177522	0	0	2.710841087	0	0	0	0	0	0
F2S4_160119_002_H01	VISp	L2/3	GABAergic	Lamp5	6	Lamp5 Lsp1	Core	0	0	0	0	0	30.17649477	0	0	0	0	0	0	0	0	76.69859088	0	0	37.09194149	0	0	0	0	0.628676974	0	0	0	0	0	0
F2S4_160119_003_A01	VISp	L2/3	GABAergic	Lamp5	6	Lamp5 Lsp1	Core	0	0	2.702428808	0	0	4.053643212	16.89018005	0	15.53896565	0	0	0	0	0	33.1047529	0	0	0	0	0	0	0	79.04604263	0	0	0	0	0	0
F2S4_160119_003_C01	VISp	L2/3	GABAergic	Lamp5	6	Lamp5 Lsp1	Core	0	0	0	0	0	3.750111834	36.42965781	0	13.92898681	19.82201969	0	0	0	0	56.25167751	0	0	0	78.75234851	0	0	0	101.2530195	0	0	0	0	0	0
F2S4_160119_004_E01	VISp	L2/3	GABAergic	Lamp5	6	Lamp5 Lsp1	Core	0	0	0	0	0	0	0	0	0	0	0	0	0	0	164.016453	0	0	0	0	11.33754284	0	0	91.45617889	0	0	0	0	0	0
F2S4_160119_005_D01	VISp	L2/3	GABAergic	Lamp5	6	Lamp5 Lsp1	Core	34.58875741	0	0	0	0	0	0	0	0	0	0	0	0	0	62.0823851	0	0	0	0	28.3805189	0	0	0	0	0	0	0	0	0
F2S4_160119_005_G01	VISp	L2/3	GABAergic	Lamp5	6	Lamp5 Lsp1	Core	0	0	0	0	0	17.87810707	0	0	38.31022943	0	0	0	0	0	110.6739961	0	0	45.12093688	0	0	0	0	178.7810707	0	0	0	0.851338432	0	0
F2S4_160119_006_E01	VISp	L1	GABAergic	Lamp5	6	Lamp5 Lsp1	Core	0	0	0	0	0	0.594245917	32.68352542	0	27.92955809	0	0	0	0	0	162.8233812	0	0	0	2.971229584	49.91665701	0	0	52.88788659	0	14.261902	0	0	0	0
F2S4_160119_007_G01	VISp	L1	GABAergic	Lamp5	6	Lamp5 Lsp1	Core	0	0	0	0	0	152.0781128	0	0	51.8448112	0	0	0	0	0	27.65056597	0	0	0	0	0	0	0	227.2530891	0	9.504882053	0	0	0	0
F2S4_160121_001_E01	VISp	L2/3	GABAergic	Lamp5	6	Lamp5 Lsp1	Core	0	0	0	0	0	35.77459145	0	0	13.1173502	24.44597083	0	0	0	0	87.64774906	0	0	0	12.52110701	0	0	0	47.69945527	0	5.962431909	0	0	0	0
F2S4_160121_004_B01	VISp	L2/3	GABAergic	Lamp5	6	Lamp5 Lsp1	Core	0	0	0	0	0	132.7994673	0	0	0	0	0	0	0	0	469.9524529	0	0	0	0	0	0	0	55.18151383	0	0	0	0	0	0
F2S4_160121_006_A01	VISp	L2/3	GABAergic	Lamp5	6	Lamp5 Lsp1	Core	0	0	0	0	0	4.376986057	30.01361868	0	0	0	0	0	0	0	0	0	0	0	7.50340467	0	0	0	93.16727465	0	0	0	0	0	0
F2S4_160121_007_B01	VISp	L1	GABAergic	Lamp5	6	Lamp5 Lsp1	Core	0	0	0	0	0	73.10581686	0	0	0	31.22227595	0	0	0	0	47.97569232	0	0	0	87.57467645	81.48252504	0	0	5.33063248	0	0	0	0	0	0
F2S4_160121_008_C01	VISp	L4	GABAergic	Lamp5	6	Lamp5 Lsp1	Core	0	0	0	0	0	15.27831358	71.04415815	0	22.15355469	0	0	0	0	0	132.1574125	0	0	0	14.5143979	14.5143979	0	0	2.291747037	0	0	0	0	0	0
F2S4_160121_008_E01	VISp	L4	GABAergic	Lamp5	6	Lamp5 Lsp1	Core	0	0	0	0	0	44.34933975	263.8785715	0	0	0	0	0	0	0	75.39387757	0	0	0	0	44.34933975	0	0	33.26200481	0	0	0	0	0	0
F2S4_160121_015_A01	VISp	L5	GABAergic	Lamp5	6	Lamp5 Lsp1	Core	0	0	0	0	0	0	0	0	0	0	0	0	0	0	107.2157772	0	0	7.769259217	0	0	0	0	27.19240726	0	0.776925922	0	0	0	0
F2S4_160121_015_C01	VISp	L5	GABAergic	Lamp5	6	Lamp5 Lsp1	Core	0	0	0	0	0	0	0	0	7.853627237	0	0	0	0	0	110.736144	0	0	0	0	0	0	0	0	0	0	14.13652903	0	0	0
F2S4_160121_016_G01	VISp	L5	GABAergic	Lamp5	6	Lamp5 Lsp1	Core	0	0	0	0	0	9.18346731	0	0	20.20362808	0	0	0	0	0	91.22244195	0	0	2.448924616	16.53024116	0	0	0	145.7110147	0	10.40792962	15.91801	0	0	0
F2S4_160121_017_B01	VISp	L6	GABAergic	Lamp5	6	Lamp5 Lsp1	Core	0	0	0	0	16.81948748	27.85727614	18.39631443	0	0	25.22923122	0	0	0	0	125.6205471	0	0	25.22923122	31.01093004	103.5449698	0	0	104.5961878	0	0	0	0	0	0
F2S4_160121_017_F01	VISp	L6	GABAergic	Lamp5	6	Lamp5 Lsp1	Core	0	0	32.7083138	0	20.17012684	28.89234386	37.06942231	0	0	0	0	0	0	0	51.24302495	0	0	0	0	34.34372949	0	0	113.9339597	0	0	0	0	0	0
F2S4_160121_019_A01	VISp	L6	GABAergic	Lamp5	6	Lamp5 Lsp1	Core	0	0	0	0	0	0	0	0	21.69795494	0	0	0	0	0	6.350620958	0	0	0	1.058436826	0	0	0	54.50949656	0	0	0	0	0	0
F2S4_160121_019_B01	VISp	L6	GABAergic	Lamp5	6	Lamp5 Lsp1	Core	0	0	0	0	0	0	0	0	0	1.34249001	0	0	0	0	184.5923764	0	0	0	0	0	0	0	45.64466035	0	6.712450051	0	0	0	0
F2S4_160121_019_G01	VISp	L6	GABAergic	Lamp5	6	Lamp5 Lsp1	Core	0	0	0	0	0	21.97672158	40.00890339	0	0	0	0	0	0	0	158.3450965	0	0	0	21.4132159	0	0	0	78.89079542	0	0	0	0	0	0
F2S4_160127_003_D01	VISp	L2/3	GABAergic	Lamp5	6	Lamp5 Lsp1	Core	0	0	0	0	0	3.874557332	90.08345796	0.484319666	14.04527033	0	0	0	0	0	174.8393996	0	0	0	0	0	0	0	78.94410564	0	0	0	0	0	0
F2S4_160127_004_C01	VISp	L2/3	GABAergic	Lamp5	6	Lamp5 Lsp1	Intermediate	0	0	0	0	0	70.10485248	41.91050963	0	0	0	0	0	0	0	0	0	0	0	0	0	0	0	73.91489881	0	25.14630578	0	12.19214826	0	0
F2S4_160127_004_H01	VISp	L2/3	GABAergic	Lamp5	6	Lamp5 Lsp1	Core	0	0	1.019361757	0	0	2.038723514	15.29042636	0	7.135532301	0.509680879	0	0	0	0	195.2077765	0	0	0	0	0	0	0	1.019361757	0	0	0	0	0	0
F2S4_160127_006_B01	VISp	L2/3	GABAergic	Lamp5	6	Lamp5 Lsp1	Core	0	0	0	0	0	48.43871637	29.40922066	0	4.036559698	0	0	0	0	0	49.01536776	0	0	0	0	69.19816625	0	0	121.6734423	0	0	0	0	0	0
F2S4_160127_017_G01	VISp	L5	GABAergic	Lamp5	6	Lamp5 Lsp1	Core	0	0	0	0	0	0	36.70810522	0	17.61989051	0	0	0	0	0	206.2995514	0	0	0	0	0	0	0	0	0	0	0	0	0	0
F2S4_160127_023_E01	VISp	L6	GABAergic	Lamp5	6	Lamp5 Lsp1	Core	0	0	0	0	0	2.455444426	0	0	0.613861107	0.613861107	0	0	0	0	68.75244393	0	0	0	0	0	0	0	8.594055492	0	0	0	0	0	0
F2S4_160128_001_H01	VISp	L2/3	GABAergic	Lamp5	6	Lamp5 Lsp1	Core	0	0	47.71831397	0	0	11.79553828	0	0	27.34420239	0	0	0	0	0	4.289286649	0	0	0	0	118.4915437	0	0	36.45893651	0	0	0.536160831	0	0	0
F2S4_160128_002_C01	VISp	L2/3	GABAergic	Lamp5	6	Lamp5 Lsp1	Core	0	0	0	0	0	17.60446293	0	0	3.260085727	0	0	0	0	0	102.3666918	0	0	0	0	0	0	0	31.29682298	0	0	0	0	0	0
F2S4_160128_003_A01	VISp	L2/3	GABAergic	Lamp5	6	Lamp5 Lsp1	Core	0	0	32.62090746	0	0	0	30.96221725	0	14.37531515	0	0	0	0	0	75.19395618	0	0	0	0	0	0	0	19.90428252	0	0	0	145.9647385	0	0
F2S4_160128_003_D01	VISp	L2/3	GABAergic	Lamp5	6	Lamp5 Lsp1	Core	0	0	0	0	0	0.522007579	0	0	0	0	0	0	0	0	35.49651534	0	0	47.50268964	0	0	0	0	51.67875027	0	0	0	0	0	0
F2S4_160128_003_H01	VISp	L2/3	GABAergic	Lamp5	6	Lamp5 Lsp1	Core	0.567560404	0	39.72922828	0	0	6.810724848	151.5386279	0	0	0	0	0	0	0	0	0	0	15.89169131	9.648526869	0	0	0	134.5118158	0	0	0	32.91850343	0	0
F2S4_160128_018_G01	VISp	L5	GABAergic	Lamp5	6	Lamp5 Lsp1	Core	0	0	0	0	0	8.530660718	0	0	0	0	0	0	0	0	180.3625409	0	0	0	0	0	4.874663267	0	99.32126407	0	0	0	0	0	0
F2S4_160128_028_D01	VISp	L6	GABAergic	Lamp5	6	Lamp5 Lsp1	Core	0	0	0	0	0	62.55831645	0	0	0	0	0	0	0	0	43.67278696	0	0	0	64.32883484	0	0	0	69.05021721	0	0	41.90226857	0	0	0
F2S4_160129_022_F01	VISp	L4	GABAergic	Lamp5	6	Lamp5 Lsp1	Intermediate	0	0	40.2213012	0	0	16.20858407	16.80890199	0	3.60190757	0	0	0	0	0	226.9201769	0	0	0	0	0	0	0	152.4807538	0	0	0	301.3596	0	0
F2S4_160129_025_C01	VISp	L2/3	GABAergic	Lamp5	6	Lamp5 Lsp1	Core	0	0	0	0	0	0	0	0.381574384	0	0	0	0	0	0	21.36816548	0	0	0	0	0	0	0	4.197318219	0	0	0	0	0	0
F2S4_160129_027_D01	VISp	L2/3	GABAergic	Lamp5	6	Lamp5 Lsp1	Core	0.618446783	0	0	0	0	11.75048888	0	0	45.14661518	61.22623154	0	0	0	0	85.96410287	0	0	0	0	0	0	0	100.1883789	0	0	0	0	0	0
F2S4_160129_028_B01	VISp	L2/3	GABAergic	Lamp5	6	Lamp5 Lsp1	Core	0	0	0	0	0	11.11875216	118.9706482	0	0	0	0	0	0	0	38.35969497	0	0	0	0	0	0	0	81.72282841	0	0	0	15.56625303	0	0
F2S4_160129_029_A01	VISp	L2/3	GABAergic	Lamp5	6	Lamp5 Lsp1	Core	0	0	0	0	0	84.13909071	0	0	0	0	0	0	0	0	17.58130254	0	0	0.627903662	0	0	0	0	43.95325634	0	0	0	0	0	0
F2S4_160129_030_E01	VISp	L2/3	GABAergic	Lamp5	6	Lamp5 Lsp1	Core	0	0	0	0	0	0	0	0	0	105.7261094	0	0	0	0	0	0	0	0	0	0	0	0	43.28943064	0	0	0	0	0	0
F2S4_160303_013_B01	VISp	L5	GABAergic	Lamp5	6	Lamp5 Lsp1	Core	0	0	0	0.624717315	0	23.11454067	0	0	1.874151946	0	0	0	0	0	108.0760956	0	0	0	0	43.73021208	23.11454067	0	148.6827211	0	0	0	0	0	0
F2S4_160303_017_E01	VISp	L1	GABAergic	Lamp5	6	Lamp5 Lsp1	Core	0	0	0	0	0	1.786129986	0	0	0	0	0	0	0	0	114.9076958	0	0	86.92499266	0	0	0	0	139.3181389	0	0	0	0	0	0
F2S4_160303_017_G01	VISp	L1	GABAergic	Lamp5	6	Lamp5 Lsp1	Core	0	0	0	0	0	10.027519	0	0	0	0	0	0	0	0	41.41801326	0	0	0	0	0	0	0	14.82328896	0	0	0	0	0	0
F2S4_160303_020_F01	VISp	L2/3	GABAergic	Lamp5	6	Lamp5 Lsp1	Core	0	0	0.547564461	0	0	0.547564461	0	0	0	0	0	0	0	0	9.856160292	0	0	0	0	0	0	0	103.4896831	0	0	0	0.547564461	0	0
F2S4_160303_020_G01	VISp	L2/3	GABAergic	Lamp5	6	Lamp5 Lsp1	Core	0	0	0	0	0	0	0	0	0	0	0	0	0	0	118.2720519	0	0	0	0	0	0	0	128.0736031	0	0	0	0	0	0
F2S4_160304_002_A01	VISp	L1	GABAergic	Lamp5	6	Lamp5 Lsp1	Core	0	0	1.030940589	2.577351472	0	16.49504942	0	0	0	0	0	0	0	0	161.8576725	0	0	0	2.577351472	0	0	0	4.123762356	1.546410883	0	0	0	0	0
F2S4_160304_003_C01	VISp	L1	GABAergic	Lamp5	6	Lamp5 Lsp1	Core	0	0	65.60071784	0	0	88.22165502	0	0	0	0	0	0	0	0	81.43537387	0	0	0	0	0	0	0	75.40312395	0	0	0	0	0	0
F2S4_160304_006_G01	VISp	L5	GABAergic	Lamp5	6	Lamp5 Lsp1	Core	0	0	0	0	0	0	0	0	0	0	0	0	0	0	171.4020933	0	0	2.420933522	68.27032531	0	0	0	176.2439604	0	0	0	0	0	0
F2S4_160304_010_F01	VISp	L6	GABAergic	Lamp5	6	Lamp5 Lsp1	Core	0	0	0	0	0	25.02668209	0	0	13.55611947	0	0	0	0	0	11.99195184	0	0	0	39.62557998	130.3473026	0	0	101.670896	0	0	0	0	0	0
F2S4_160304_011_D01	VISp	L6	GABAergic	Lamp5	6	Lamp5 Lsp1	Core	0	0	0	0	0	30.85753078	52.69516795	0	0	0	0	0	0	0	46.52366179	0	0	0	0	0	69.78549269	0	56.96774913	0	0	0.474731243	0	0	0
F2S4_160304_012_A01	VISp	L4	GABAergic	Lamp5	6	Lamp5 Lsp1	Core	0	0	0	0	0	22.34283095	19.15099796	0	8.937132381	0	0	0	0	0	45.3240285	0	0	0	0	0	0	0	62.55992666	0	0	0	0	0	0
F2S4_160304_014_C01	VISp	L4	GABAergic	Lamp5	6	Lamp5 Lsp1	Core	0	0	0	0	0	16.38018407	0	0	0	0	0	0	0	0	0	0	0	0	0	0	0	0	0	0	0	0	0	0	0
F2S4_160304_016_A01	VISp	L2/3	GABAergic	Lamp5	6	Lamp5 Lsp1	Core	0	0	0	0	0	0	84.15929672	0	11.06093614	59.6328731	0	0	0	0	27.89279548	0	0	0	0	0	0	0	0.480910267	0	0	0	0.480910267	0	0
F2S4_160304_016_B01	VISp	L2/3	GABAergic	Lamp5	6	Lamp5 Lsp1	Core	0	0	0	0	0	51.85920965	0	0	0	1.13976285	0	0	0	0	121.3847435	0	0	0	96.87984221	4.559051398	0	0	184.0717002	0	0	0	0	0	0
F2S4_160304_017_G01	VISp	L2/3	GABAergic	Lamp5	6	Lamp5 Lsp1	Core	0	0	0	0	0	0	0	0	0	0	0	0	0	0	59.79579008	0	0	0	0	0	0	0	6.927561046	0	14.94894752	0	0	0	0
F2S4_160304_018_F01	VISp	L2/3	GABAergic	Lamp5	6	Lamp5 Lsp1	Core	0	0	0	0	0	47.59735857	87.87204658	0	0	0	0	0	0	0	46.13282446	0	0	0	51.9909609	0	0	0	87.13977953	0	0	0	0	0	0
F2S4_160304_019_B01	VISp	L2/3	GABAergic	Lamp5	6	Lamp5 Lsp1	Core	0	0	0	0	0	4.793110702	7.455949981	0	0	23.96555351	0	0	0	0	54.32192129	0	0	0	0	33.55177492	0	0	86.8085605	0	0	0	0.532567856	0	0
F2S4_160304_019_E01	VISp	L2/3	GABAergic	Lamp5	6	Lamp5 Lsp1	Core	0	0	0	0	52.12426834	11.24248925	0	0	0	0	74.09822461	0	0	0	29.1282676	0	0	0	0	0	0	0	83.80764714	0	0	0	0	0	0
F2S4_160304_021_A01	VISp	L1	GABAergic	Lamp5	6	Lamp5 Lsp1	Core	0	0	0	0	0	7.152359563	0	0	13.35107119	53.88110871	0	0	0	0	11.4437753	0	0	0	0	38.62274164	0	0	104.9012736	0.476823971	0	0	0	0	0
F2S4_160304_021_B01	VISp	L1	GABAergic	Lamp5	6	Lamp5 Lsp1	Core	0	0	0	0	0	35.11315866	0	0	0	5.201949431	0	0	0	0	50.06876327	0	0	0	0.650243679	0	0	0	132.6497105	0	0	0	0	0	0
F2S4_160304_021_D01	VISp	L1	GABAergic	Lamp5	6	Lamp5 Lsp1	Intermediate	0	0	0	0	0	91.49986176	0	0	0	60.33686536	0	0	0	0	171.0649589	0	0	0	0	265.8800331	0	0	327.5429834	0	0	0	0	0	0
F2S4_160317_009_F01	VISp	L5	GABAergic	Lamp5	6	Lamp5 Lsp1	Core	0	0	0	0	0	7.573129929	0	0	0	0	0	0	0	0	2.524376643	0	0	0	6.563379272	0	0	0	41.39977695	0	0	0	0	0	0
F2S4_160317_017_H01	VISp	L2/3	GABAergic	Lamp5	6	Lamp5 Lsp1	Core	0	0	0	0	0	53.92425213	0	0	0	0	0	0	0	0	83.9580128	0	0	0	55.97200854	0	0	0	16.38205128	0	0	0	0	0	0
F2S4_160317_021_F01	VISp	L2/3	GABAergic	Lamp5	6	Lamp5 Lsp1	Core	0	0	0	0	0	14.66330486	0	0	14.66330486	0	0	0	0	0	49.85523652	0	0	0	0	0	0	0	27.86027923	0	0	0	0	0	0
F2S4_160321_001_E01	VISp	L2/3	GABAergic	Lamp5	6	Lamp5 Lsp1	Core	0	0	0	0	0	30.38000321	0	0	0	0.562592652	0	0	0	0	201.4081694	0	0	24.75407669	0.562592652	18.00296486	0	0	48.94556072	0	0	0	0	0	0
F2S4_160321_001_F01	VISp	L2/3	GABAergic	Lamp5	6	Lamp5 Lsp1	Core	0	0	0	0	0	0	0	0	30.92110095	0	0	0	0	0	176.1398429	0	0	0	0	0	0	0	0	0	0	0	54.11192666	0	0
F2S4_160321_002_F01	VISp	L2/3	GABAergic	Lamp5	6	Lamp5 Lsp1	Core	0	0	0	0	0	14.87065591	0	0	25.80496173	0	0	0	0	0	25.80496173	0	0	0	141.2712311	0	0	0	27.55445066	0	0	0	0	0	0
F2S4_160321_006_F01	VISp	L4	GABAergic	Lamp5	6	Lamp5 Lsp1	Core	0	0	0	0	0	0	0	0.555751304	0	0	0	0	0	0	127.2670485	0	0	0	0	0	0	0	123.9325407	0	0	0	0	0	0
F2S4_160321_022_F01	VISp	L5	GABAergic	Lamp5	6	Lamp5 Lsp1	Core	0	0	0	0	0	19.45825728	54.64872257	0	38.91651455	0	0	0	0	0	67.48289226	0	0	0	45.95460761	0	0	0	98.53330281	0	0	0	0	0	0
F2S4_160330_001_B01	VISp	L2/3	GABAergic	Lamp5	6	Lamp5 Lsp1	Core	0	0	0	0	0.611488026	20.79059287	0	0	0	0	0	0	0	0	99.06106014	0	0	0	0	0	0	0	158.9868866	0	0	0	0	0	0
F2S4_160330_002_C01	VISp	L2/3	GABAergic	Lamp5	6	Lamp5 Lsp1	Core	0	0	0	0	0	80.81545947	0	0	0	0	0	0	0	0	118.0745349	0	0	0	0	0	0	0	97.08350651	0	0	0	0	0	0
F2S4_160330_003_E01	VISp	L2/3	GABAergic	Lamp5	6	Lamp5 Lsp1	Core	0	0	0	0	0	42.36046235	0	0	0	0	0	0	0	0	81.85873129	0	0	0	0	0	0	0	74.98946713	0	0	0.57243868	0	0	0
F2S4_160330_003_G01	VISp	L2/3	GABAergic	Lamp5	6	Lamp5 Lsp1	Core	0	0	103.5596268	0	0	34.5198756	0	0	0	0	0	0	0	0	214.4416515	0	0	0	0	0	0	0	16.21388097	0	0	0	0	0	0
F2S4_160330_003_H01	VISp	L2/3	GABAergic	Lamp5	6	Lamp5 Lsp1	Core	0	0	18.70631895	0	0	0	29.25860143	0	0	0	0	0	0	0	0	0	0	17.26737134	0	0	0	0	78.66246942	0	0	0	15.82842372	0	0
F2S4_160330_005_C01	VISp	L2/3	GABAergic	Lamp5	6	Lamp5 Lsp1	Core	0	0	0	0	0	0	0	0	0	43.84530429	0	0	0	0	1.777512336	0	0	0	216.2640009	10.0725699	0	0	0	0	0	0	0	0	0
F2S4_160330_005_E01	VISp	L2/3	GABAergic	Lamp5	6	Lamp5 Lsp1	Core	0	0	0	0	0	46.72684518	0	0	64.32526739	0	0	0	0	0	136.5394827	0	0	0	90.41947963	0	0	0	134.1121141	0	0	0	0	0	0
F2S4_160330_012_E01	VISp	L4	GABAergic	Lamp5	6	Lamp5 Lsp1	Core	0	0	75.2091161	0	0	0	8.848131306	0	0	0	0	0	0	0	66.3609848	0	0	0	0	0	0	0	154.2102885	0	0	0	0	0	0
F2S4_160330_021_A01	VISp	L4	GABAergic	Lamp5	6	Lamp5 Lsp1	Core	0	0	0	0	0	1.516367673	36.39282414	0	26.28370633	0	0	0	0	0	41.44738305	0	0	19.20732385	0	0	0	0	41.44738305	0	0	0	0	0	0
F2S4_160330_021_D01	VISp	L4	GABAergic	Lamp5	6	Lamp5 Lsp1	Core	0	0	0	0	0	0	0	0	0	0	0	0	0	0	6.322434685	0	0	0	0	0	0	0	8.956782471	0	0	0	0	0	0
F2S4_160404_001_G01	VISp	L1	GABAergic	Lamp5	6	Lamp5 Lsp1	Intermediate	0	0	0	0	0	15.20246007	37.7440388	0	0	0	0	0	0	0.524222761	177.1872933	0	0	0.524222761	0	77.06074589	0	0	0	0	0	0	0	0	0
F2S4_160404_002_D01	VISp	L1	GABAergic	Lamp5	6	Lamp5 Lsp1	Core	0	0	0	0	0	3.35932706	0.559887843	0	0	0	0	0	0	0	57.66844786	0	0	0	0	0	0	0	24.07517726	0	0	0	0	0	0
F2S4_160404_003_C01	VISp	L1	GABAergic	Lamp5	6	Lamp5 Lsp1	Core	0	0	0	0.475430467	0	0	28.525828	0	0	0	0	0	0	0	27.0995366	0	0	0	0	0	0	0	0	0	0	22.34523193	0	0	0
F2S4_160404_005_D01	VISp	L1	GABAergic	Lamp5	6	Lamp5 Lsp1	Core	0	0	0	0	0	8.438767134	40.31855408	0	0	0	0	0	0	0	34.22388893	0	0	0	40.31855408	31.41096655	0	0	87.20059371	0	0	0	0	0	0
F2S4_160404_005_E01	VISp	L1	GABAergic	Lamp5	6	Lamp5 Lsp1	Core	0	0	0	0	0	0	43.24191163	0	0	0	0	0	0	0	74.69057464	0	0	0	0	122.5187496	0	0	92.38044758	0	0	0	0	0	0
F2S4_160404_005_F01	VISp	L1	GABAergic	Lamp5	6	Lamp5 Lsp1	Core	0	0	53.91426141	0	0	31.54557849	0.573555972	0	0	0	68.25316072	0	0	0	166.331232	0	0	0	0	67.67960475	0	0	0	0	0	0	0	0	0
F2S4_160404_007_B01	VISp	L5	GABAergic	Lamp5	6	Lamp5 Lsp1	Core	0	0	54.11478633	0	0	2.661382934	0	0	47.01776517	0	0	0	0	0	47.01776517	0	0	26.17026552	5.766329691	0	0	0	148.5938805	0	0	0	0	0	0
F2S4_160404_008_F01	VISp	L5	GABAergic	Lamp5	6	Lamp5 Lsp1	Core	0	0	0	1.032177621	0	17.03093075	5.160888106	0	7.225243349	0	0	0	0	0	186.3080606	0	0	0	0	0	0	0	125.409581	0	0	0	0	0	0
F2S4_160404_009_F01	VISp	L5	GABAergic	Lamp5	6	Lamp5 Lsp1	Core	0	0	19.73133195	0	0	10.90415713	0	0	0	0	0	0	0	0	30.11624351	0	0	0	0	32.7124714	0	0	37.90492717	0	0	0	0	0	0
F2S4_160404_010_D01	VISp	L5	GABAergic	Lamp5	6	Lamp5 Lsp1	Core	0	0	0	0	0	0	0.471721922	0	17.92543303	0	0	0	0	0	102.835379	0	0	18.39715495	0	0	23.11437417	0	141.0448546	0	0	0	0	0	0
F2S4_160404_011_E01	VISp	L5	GABAergic	Lamp5	6	Lamp5 Lsp1	Core	0	0	0	0	0	17.8111389	0	0	0	0	0	0	0	0	79.92177713	0	0	13.70087608	0	0	0	0	37.44906128	0	7.307133909	0	0	0	0
F2S4_160404_013_G01	VISp	L2/3	GABAergic	Lamp5	6	Lamp5 Lsp1	Core	0	0	0	0	0	31.16943258	15.33733984	0	0	0.494752898	0	0	0	0	30.17992679	0	0	12.36882245	0	0	0	0	33.64319707	0	0	0	0	0	0
F2S4_160404_013_H01	VISp	L2/3	GABAergic	Lamp5	6	Lamp5 Lsp1	Core	0	0	7.362635869	0	0	17.55705476	32.84868311	0	0	0	0	0	0	0	122.3330267	0	0	0	88.91798703	0	0	0	37.94589256	0	0	0	0	0	0
F2S4_160404_017_A01	VISp	L2/3	GABAergic	Lamp5	6	Lamp5 Lsp1	Core	0	0	0	0	0	0	0	0	0	0	0	0	0	0	61.75453019	0	0	20.74952214	49.40362415	0	0	0	43.96922549	0	0	21.73759463	0	0	0
F2S4_160404_017_D01	VISp	L2/3	GABAergic	Lamp5	6	Lamp5 Lsp1	Core	0	0	0	0	0	2.835794992	47.64135587	0	4.537271988	0	0	0	0	0	22.68635994	0	0	0	0	0	0	0	192.8340595	0	0	0	0	0	0
F2S4_160404_017_E01	VISp	L2/3	GABAergic	Lamp5	6	Lamp5 Lsp1	Core	0	0	0	0.500368772	0	13.50995684	93.06859155	0	13.00958807	4.503318946	0	0	0	0	24.01770105	0	0	25.51880736	34.52544525	0	0	0	133.5984621	0	0	0	0	0	0
F2S4_160404_020_H01	VISp	L2/3	GABAergic	Lamp5	6	Lamp5 Lsp1	Core	0	0	0	0	0	31.6935005	1.25105923	0	0	33.36157947	0	0	0	0	46.70621126	0	0	23.77012537	0	0	0	0	148.8760484	0	0	0	0	0	0
F2S4_160404_022_D01	VISp	L4	GABAergic	Lamp5	6	Lamp5 Lsp1	Core	0	0	0	0	0	0	54.15704559	0	15.31714421	0	0	0	0	0	135.1190935	0	0	0	0	0	0	0	35.01061533	0	0	0	0	0	0
F2S4_160404_026_F01	VISp	L6	GABAergic	Lamp5	6	Lamp5 Lsp1	Core	0	0	55.29975252	0	0	15.86116933	0	0	0	0	0.428680252	0	0	0	134.1769189	0	0	0	39.00990294	0	66.44543908	0	64.30203782	0	0	0	0	0	0
F2S4_160404_027_G01	VISp	L6	GABAergic	Lamp5	6	Lamp5 Lsp1	Core	0	0	0	0	0	10.06448314	0	0	0	0	0	0	0	0	91.08357245	0	0	0	88.06422751	24.15475954	52.33531235	0	37.23858763	0	0	0	0	0	0
F2S4_160404_028_F01	VISp	L1	GABAergic	Lamp5	6	Lamp5 Lsp1	Core	0	0	0.567742141	0	0	22.70968562	0	0	0	0	0	0	0	0	35.76775486	0	0	0	31.22581773	0	0	0	0.567742141	0	0	0	0	0	0
F2S4_160404_029_E01	VISp	L1	GABAergic	Lamp5	6	Lamp5 Lsp1	Core	0	0	35.82495925	0.617671711	0	13.58877765	17.91247962	0	0	0	0	0	0	0	3.706030267	0	0	0	0	38.91331781	0	0	14.82412107	0	0	0	0	0	0
F2S4_160404_030_E01	VISp	L1	GABAergic	Lamp5	6	Lamp5 Lsp1	Core	0	0	0	0	0	5.618948217	0	0	19.66631876	0	0	0	0	0	66.02264155	0	0	0	49.1657969	1.404737054	0	0	56.18948217	0	0	0	0	0	0
F2S4_160404_034_G01	VISp	L1	GABAergic	Lamp5	6	Lamp5 Lsp1	Core	0	0	0	0	0	7.979486149	0.469381538	0	19.7140246	0	0	0	0	0	53.97887689	0	0	0	27.22412922	0	0	0	0	0	0	0	0	0	0
F2S4_160404_034_H01	VISp	L1	GABAergic	Lamp5	6	Lamp5 Lsp1	Core	0	0	0	0	0	30.14364778	12.41209026	0	0	0	0	0	0	0	62.94702919	0	0	16.4016907	0	0	0	0	104.6161894	0	0	0	0	0	0
F2S4_160404_035_C01	VISp	L1	GABAergic	Lamp5	6	Lamp5 Lsp1	Core	0	0	0	0	0	0	1.408477485	0	0	0	0	0	0	0	184.5105506	0	0	32.39498216	2.112716228	0	0	0	1.408477485	0	0	0.704238743	0	0	0
F2S4_160404_035_E01	VISp	L1	GABAergic	Lamp5	6	Lamp5 Lsp1	Core	0	0	0.704842834	0	0	4.229057005	0	0	0	0	0	0	0	0	28.8985562	0	0	0	0	0	0	0	47.92931272	0	0	0	0	0	0
F2S4_160404_040_E01	VISp	L5	GABAergic	Lamp5	6	Lamp5 Lsp1	Core	0	0	0	0	0	0	85.29223361	0	0	0	0	0	0	0	9.672315152	0	0	0	0	0	0	0	82.21467879	0	0	0	0	0	0
F2S4_160404_041_E01	VISp	L5	GABAergic	Lamp5	6	Lamp5 Lsp1	Core	0	0	0	0	0	6.120109503	0	0	0	0	0	0	0	0	27.77588159	0	0	0	0	19.77266147	0	0	8.003220119	0	0	0	0	0	0
F2S4_160404_042_E01	VISp	L5	GABAergic	Lamp5	6	Lamp5 Lsp1	Core	0	0	0	0	0	15.26919821	0	0	37.72390146	0	0	0	0	0	25.5983617	0	0	0	0.449094065	0	0	0	45.80759463	0	10.77825756	0	0	0	0
F2S4_160404_045_G01	VISp	L2/3	GABAergic	Lamp5	6	Lamp5 Lsp1	Core	0	0	0	0	0	3.201922434	0	0	0	0	0	0	0	0	105.6634403	0	0	0	60.83652625	48.02883651	0	0	74.8449369	0	0	0	0	0	0
F2S4_160404_047_A01	VISp	L2/3	GABAergic	Lamp5	6	Lamp5 Lsp1	Core	0	0	0	0	0	0.539052464	0	0	18.32778379	0	0	0	0	0	150.3956376	0	0	0	0	43.12419715	0	0	38.81177743	0	0	0	0	0	0
F2S4_160404_047_E01	VISp	L2/3	GABAergic	Lamp5	6	Lamp5 Lsp1	Core	0	0	0	0	0	0	34.6991798	0	0	0	0	0	0	0	138.7967192	0	0	0	0	0	0	0	17.96921811	0	0	0.619628211	0	0	0
F2S4_160404_048_A01	VISp	L2/3	GABAergic	Lamp5	6	Lamp5 Lsp1	Core	0	0	0	0	0	11.24538556	0	0	0	0	0	0	0	0	2.044615556	0	0	0	0	0	0	0	71.05039057	0	0	0	0	0	0
F2S4_160404_048_C01	VISp	L2/3	GABAergic	Lamp5	6	Lamp5 Lsp1	Core	0	0	6.556553002	0	0	1.63913825	0	0	16.93776192	0	0	0	0	0	13.65948542	0	0	0	0	0	0	0	32.78276501	0.546379417	0	0	0	0	0
F2S4_160404_049_C01	VISp	L2/3	GABAergic	Lamp5	6	Lamp5 Lsp1	Core	0	0	0	0	0	22.1232616	15.67064363	0	0	0	0	0	0	0	96.3283682	0	0	0	0	0	0	0	62.68257452	0	0	0	0	0	0
F2S4_160404_051_B01	VISp	L6	GABAergic	Lamp5	6	Lamp5 Lsp1	Core	0	0	0	0	0	7.554079656	0	0	4.028842483	41.29563545	0	0	0	0	91.15256119	0	0	0	102.7354833	0	50.36053104	0	96.18861429	0	0	1.007210621	0	0	0
F2S4_160404_051_D01	VISp	L4	GABAergic	Lamp5	6	Lamp5 Lsp1	Core	0	0	0	0	0	0	35.25019781	0	23.81770122	0	0	0	0	0	116.230382	0	0	0	0	0	0	0	35.25019781	0	0	0	0	0	0
F2S4_160404_051_H01	VISp	L4	GABAergic	Lamp5	6	Lamp5 Lsp1	Core	0	0	27.78572904	0	0	0	19.39758442	0	0	0	0	22.01887962	0	0	68.153675	0	0	0	2.621295192	0	0	0	73.92052443	0	0	0	0	0	0
F2S4_160405_003_C01	VISp	L1	GABAergic	Lamp5	6	Lamp5 Lsp1	Core	0	0	0	0	0	42.37954597	35.82600793	0	0	0	0	0	0	0	120.1481973	0	0	0	0	50.68069415	0	0	34.07839779	0	0	0	0.436902536	0	0
F2S4_160405_009_E01	VISp	L1	GABAergic	Lamp5	6	Lamp5 Lsp1	Core	0	0	0	0	0	58.00821541	186.4549781	0	27.96824672	141.3950251	0	0	0	0	157.4508704	0	0	0	0	50.75718849	0	0	34.70134315	0	0	0	0	0	0
F2S4_160405_009_G01	VISp	L1	GABAergic	Lamp5	6	Lamp5 Lsp1	Core	0	0	8.37950275	0	0	2.957471559	0	0	0	0	0	0	0	0	0.985823853	0	0	0	0	0	0	0	44.85498531	0	0	0	0	0	0
F2S4_160405_014_C01	VISp	L1	GABAergic	Lamp5	6	Lamp5 Lsp1	Core	0	0	0	0	0	5.607128679	105.4140192	0	0	0	0	0	0	0	44.29631657	0	0	0	12.33568309	0	0	0	32.52134634	0	6.167841547	0	52.70700958	0	0
F2S4_160405_020_F01	VISp	L1	GABAergic	Lamp5	6	Lamp5 Lsp1	Core	0	0	0	0	0	13.40565103	20.85323493	0	6.951078311	0	0	0	0	0	23.83226849	0	0	0	0	0	0	0	6.454572717	0	0	0	89.37100685	0	0
F2S4_160405_024_A01	VISp	L5	GABAergic	Lamp5	6	Lamp5 Lsp1	Core	0	0	0	0	0	8.491799752	0	0	5.095079851	0	0	0	0	0	95.67427721	0	0	0	27.73987919	0	0	0	39.62839884	0	0	0	0	0	0
F2S4_160405_031_F01	VISp	L6	GABAergic	Lamp5	6	Lamp5 Lsp1	Core	0	0	0	0	0	21.45196304	62.26301467	0	0	0	0	0	0	0	55.98439134	0	0	0	36.62530275	0	12.55724666	0	199.8695093	0	0	0	0	0	0
F2S4_160405_031_G01	VISp	L6	GABAergic	Lamp5	6	Lamp5 Lsp1	Core	0	0	0	0	0	0	29.4040206	0	35.64123709	0	0	0	0	0	147.020103	0	0	0	0.445515464	71.72798964	0	0	148.3566494	0	0	0	0	0	0
F2S4_160405_031_H01	VISp	L6	GABAergic	Lamp5	6	Lamp5 Lsp1	Core	0	0	29.17133451	0	29.68311231	0	72.67244737	0	1.023555597	0	0	0	0	0	77.79022535	0	0	0	0	78.30200315	0	0	7.164889177	0	0	0	0	0	0
F2S4_160405_032_H01	VISp	L1	GABAergic	Lamp5	6	Lamp5 Lsp1	Core	0	0	0	0	0	0.988699657	77.6129231	0	0	54.87283098	0	0	0	0	116.6665596	0	0	0	55.86153064	43.50278492	0	0	164.1241431	0	0	0	0	0	0
F2S4_160405_034_E01	VISp	L2/3	GABAergic	Lamp5	6	Lamp5 Lsp1	Core	0	0	0.510079685	0	0	7.65119527	48.45757004	0	0	46.4172513	0	0	0	0	67.33051837	0	0	31.11486076	113.7477697	0	0	0	55.59868563	0	0	0	0	0	0
F2S4_160405_034_F01	VISp	L2/3	GABAergic	Lamp5	6	Lamp5 Lsp1	Core	0	0	0	0	0	37.79034761	33.2780673	0	0	0	0	0	0	0	142.7008649	0	0	37.79034761	16.92105117	0	0	0	64.29999444	0	0	0	0	0	0
F2S4_160405_035_H01	VISp	L2/3	GABAergic	Lamp5	6	Lamp5 Lsp1	Core	0	0	0	0	0	11.09742942	0	0	0	0	0	0	0	0	95.71532874	0	0	0	33.75468115	0	0	0	12.94700099	0	0	0	0	0	0
F2S4_160405_037_F01	VISp	L2/3	GABAergic	Lamp5	6	Lamp5 Lsp1	Core	0	0	238.5149565	0	40.66634316	1.370775612	1.827700816	0	0	0	0	0	0	0	75.84958388	0	0	13.70775612	0	0	0	0	28.78628786	0	0	0	74.93573347	0	0
F2S4_160405_037_G01	VISp	L2/3	GABAergic	Lamp5	6	Lamp5 Lsp1	Core	0	0	0	0	0	3.78237536	0	0	0	0	0	0	0	0	74.22911644	0	0	19.85747064	0	0	0	0	181.5540173	0	0	0	0	0	0
F2S4_160405_037_H01	VISp	L2/3	GABAergic	Lamp5	6	Lamp5 Lsp1	Core	0	0	0	0	0	1.95642647	0	0	2.934639705	0	0	0	0	0	118.3638014	0	0	0	14.67319852	0	0	0	67.00760659	0	0	0	0	0	0
F2S4_160405_038_A01	VISp	L2/3	GABAergic	Lamp5	6	Lamp5 Lsp1	Core	0	0	0	0	0.446508504	25.89749326	34.38115484	0	32.14861232	0	0	0	0	0	75.01342874	0	0	0	0	60.2786481	0	0	98.23187097	0	0	0	0	0	0
F2S4_160405_038_H01	VISp	L2/3	GABAergic	Lamp5	6	Lamp5 Lsp1	Core	0	0	0	0	0	0	32.22089759	0	0	0	0	0.555532717	0	0	162.2155534	0	0	0	64.44179517	42.22048649	0	0	13.88831792	0	0	0.555532717	0	0	0
F2S4_160405_039_A01	VISp	L2/3	GABAergic	Lamp5	6	Lamp5 Lsp1	Core	0	0	0	0	0	0.629716181	25.18864722	0	39.0424032	0	0	0	0	0	43.45041646	0	0	0	69.89849605	0	0	0	79.97395494	0	0	0	0	0	0
F2S4_160405_039_B01	VISp	L2/3	GABAergic	Lamp5	6	Lamp5 Lsp1	Core	0	0	0	0	0	0.548244111	24.12274089	0	0	0	0	0	0	0	25.21922911	0	0	21.92976445	0	0	0	0	0	0	0	0	0	0	0
F2S4_160405_042_D01	VISp	L1	GABAergic	Lamp5	6	Lamp5 Lsp1	Core	0	0	0	0	0	64.27348467	0	0	17.30439972	0	0	0	0	0	120.6363866	0	0	0	57.35172478	106.7928668	0	0	41.0361479	0	0	0	0	0	0
F2S4_160405_042_E01	VISp	L1	GABAergic	Lamp5	6	Lamp5 Lsp1	Core	0	0	4.526773602	0	0	44.76476118	27.16064161	0	0	41.24393727	0	0	0	0	74.94325186	0	0	0	0	0	0	0	148.3775792	0	0	0	0	0	0
F2S4_160413_006_H01	VISp	L1	GABAergic	Lamp5	6	Lamp5 Lsp1	Intermediate	0	0	0	0	0	6.400949047	0	0	7.467773889	22.93673409	0	0	0	0	44.80664333	0	0	0	0	0	0	0	0	0	0	0	0	0	0
F2S4_160413_008_B01	VISp	L1	GABAergic	Lamp5	6	Lamp5 Lsp1	Core	0	0	0	0	0.389771613	4.67725936	102.1201627	0	0	0	0	0	0	0	46.38282199	0	0	0	52.22939619	0	0	0	0	0	0	0	0	0	0
F2S4_160413_009_B01	VISp	L1	GABAergic	Lamp5	6	Lamp5 Lsp1	Core	0	0	0	0	0.445892704	13.82267382	0	0	15.60624464	39.23855795	0	0	0	0	28.09124035	0	0	0	0	0	0	0	63.76265666	0	0	0	0	0	0
F2S4_160413_009_E01	VISp	L1	GABAergic	Lamp5	6	Lamp5 Lsp1	Core	0	0	68.16632584	0	0	13.3744057	0	0	1.725729768	64.28343386	0	0	0	0	133.3126246	0	0	0	0	0	0	0	63.85200142	0	0	0	0	0	0
F2S4_160413_009_F01	VISp	L1	GABAergic	Lamp5	6	Lamp5 Lsp1	Core	0	0	0	0	0	7.644592979	0	0	0	0	0	0	0	0	35.07519132	0	0	0	0	4.4968194	0	0	1.34904582	0	0	0	0	0	0
F2S4_160413_012_C01	VISp	L6	GABAergic	Lamp5	6	Lamp5 Lsp1	Core	0	0	0	0	0	0	0	0	48.21503739	0	0	0	0	0	136.2598883	0	0	0	0	0	0	0	116.5546121	0	0	0	0	0	0
F2S4_160413_012_G01	VISp	L6	GABAergic	Lamp5	6	Lamp5 Lsp1	Core	0	0	23.74455707	0	0	0	0	0	0	0	0	0	0	0	172.2743396	0	0	8.588456811	82.85334806	3.536423393	6.567643444	0	113.6707519	0	0	0	0	0	0
F2S4_160413_013_C01	VISp	L6	GABAergic	Lamp5	6	Lamp5 Lsp1	Core	0	0	0	0	15.05341911	0	0	0	46.52874998	0	0	0	0	0	40.37053307	0	0	10.26369485	0	0	14.36917279	0	60.21367644	0	0	0	0	0	0
F2S4_160413_013_E01	VISp	L6	GABAergic	Lamp5	6	Lamp5 Lsp1	Core	0	0	0	0	0	13.13194501	0.596906591	0	4.77525273	0	0	0	0	0	0	0	0	0	0	0	0	0	0	0	0	0.596906591	0	0	0
F2S4_160413_014_G01	VISp	L6	GABAergic	Lamp5	6	Lamp5 Lsp1	Core	0	0	0	0	0	9.971669961	21.51781413	0	18.36886572	0	0	0	0	0	125.4331116	0	0	14.69509257	0	0	29.39018515	0	28.86536041	0	6.297896817	0	0	0	0
F2S4_160413_018_B01	VISp	L5	GABAergic	Lamp5	6	Lamp5 Lsp1	Core	0	0	0.909735581	0	0	18.19471162	0	0	0	0.45486779	0	0	0	0	132.366527	0	0	0	50.49032473	0	0	0	72.77884646	0	0	0	0	0	0
F2S4_160413_020_E01	VISp	L5	GABAergic	Lamp5	6	Lamp5 Lsp1	Core	0	0	42.10243139	0	0	5.467848232	18.59068399	0	24.05853222	0	0	0	0	0	225.2753472	0	0	0	0	4.921063409	0	0	44.28957068	0	0	0	0	0	0
F2S4_160413_024_D01	VISp	L2/3	GABAergic	Lamp5	6	Lamp5 Lsp1	Core	0	0	0	0	0	1.015543915	127.4507614	0	0	0	0	0	0	0	74.64247776	0	0	0	0	0	0	0	259.4714703	0	0	0	0	0	0
F2S4_160413_024_G01	VISp	L2/3	GABAergic	Lamp5	6	Lamp5 Lsp1	Core	0	0	0	0	0	0	0	0	0	0	0	0	0	0	23.58708028	0	0	19.83459024	0	0	0	0	47.17416057	0	0	0	0	0	0
F2S4_160414_002_F01	VISp	L1	GABAergic	Lamp5	6	Lamp5 Lsp1	Core	0	0	0	0	0	0	92.46212309	0	0	0	0	0	0	0	33.85936902	0	0	0	141.0807042	0	0	0	16.92968451	0	0	0	0	0	0
F2S4_160414_003_D01	VISp	L5	GABAergic	Lamp5	6	Lamp5 Lsp1	Core	0	0	0	0	0	21.06118583	0	0	0	0	0	0	0	0	89.3816179	0	0	0	0	0	0	0	160.7841747	0	0	0	0	0	0
F2S4_160414_003_G01	VISp	L5	GABAergic	Lamp5	6	Lamp5 Lsp1	Core	0	0	150.9772249	0	43.8826536	18.80685154	16.71720137	0	43.8826536	0	0	0	0	0	153.5892876	0	0	0	0	0	0	0	3.6568878	0	0	0	0	0	0
F2S4_160414_006_A01	VISp	L6	GABAergic	Lamp5	6	Lamp5 Lsp1	Core	0	0	3.4409025	0	0	2.4577875	0	0	2.949345	0	0	0	0.4915575	0	4.424017499	0	0	0	38.8330425	0	21.1369725	0	41.78238749	0	0	0	0	0	0
F2S4_160414_006_D01	VISp	L6	GABAergic	Lamp5	6	Lamp5 Lsp1	Core	0	0	0	0	0	29.90746002	0	0	18.36422984	0	0	0	0	0	75.55568848	0	0	0	0	0	26.75930634	0	99.16684113	0	0	0	0	0	0
F2S4_160414_007_B01	VISp	L6	GABAergic	Lamp5	6	Lamp5 Lsp1	Core	0	0	0.47938064	0	0	11.02575472	0	0	0	0	0	0	0	0	75.74214115	0	0	0	0	36.43292866	0	0	0.47938064	0	0	0	0	0	0
F2S4_160414_007_D01	VISp	L6	GABAergic	Lamp5	6	Lamp5 Lsp1	Core	0	0	0	0	0	0	0	0	0	0	0	0	0	0	32.52378534	0	0	0	0	0	0	0	85.9557184	0	0	0	0	0	0
F2S4_160414_008_A01	VISp	L1	GABAergic	Lamp5	6	Lamp5 Lsp1	Core	0	0	0	0	0	0	0	0	29.70165469	0	0	0	0	0	14.59028652	0	0	0	0	0	0	0	176.1256015	0	0	0	0	0	0
F2S4_160414_009_A01	VISp	L1	GABAergic	Lamp5	6	Lamp5 Lsp1	Core	0	0	0	0	0	0	24.64095607	0	0	0	0	0	0	0	53.20206424	0	0	0	0	0	0	0	141.6854974	0	0	0	0	0	0
F2S4_160414_010_A01	VISp	L2/3	GABAergic	Lamp5	6	Lamp5 Lsp1	Core	3.289187735	0	0	0	0	8.927795281	0	0	0	0	0	0	0	0	69.5428264	0	0	0	0	0	0	0	139.5555368	0	0	0	0	0	0
F2S4_160414_010_D01	VISp	L2/3	GABAergic	Lamp5	6	Lamp5 Lsp1	Core	0	0	0	0	63.12805526	16.03252197	0	0	0.501016312	0	0	0	0	0	101.7063113	0	0	0	0	0	0	0	44.08943542	0	0	0	0	0	0
F2S4_160414_010_G01	VISp	L1	GABAergic	Lamp5	6	Lamp5 Lsp1	Core	0	0	0	0	0	17.80654524	0	0	0	0	0	0	0	0	44.5163631	0	0	0	0	0	0	0	56.98094477	0	0	0	0	0	0
F2S4_160414_011_F01	VISp	L2/3	GABAergic	Lamp5	6	Lamp5 Lsp1	Core	0	0	0	0	0	34.88858355	58.30694785	0	32.97688034	0	0	0	0	0	91.76175399	0	0	60.21865105	84.59286696	0	0	0	70.7330187	0	0	0	0	0	0
F2S4_160415_002_H01	VISp	L5	GABAergic	Lamp5	6	Lamp5 Lsp1	Core	0	0	0	0	0	12.42664397	0	0	0	0	0	0	0	0	28.47772576	0	0	30.54883309	0	0	0	0	63.1687735	0	0	0	0	0	0
F2S4_160415_005_C01	VISp	L5	GABAergic	Lamp5	6	Lamp5 Lsp1	Core	0	0	0	0	0	12.28127811	17.54468302	0	0	0	0	0.877234151	0	0	156.5862959	0	0	0	90.79373462	113.6018225	0	0	74.12628575	0	0	0	89.47788339	0	0
F2S4_160415_005_G01	VISp	L5	GABAergic	Lamp5	6	Lamp5 Lsp1	Core	0	0	0	0	0	28.74145222	36.82498566	0	0	0	0	0	0	0	13.92164092	0	0	0	0	40.41766719	0	0	118.5584904	0	0	0	0.449085191	0	0
F2S4_160415_007_F01	VISp	L5	GABAergic	Lamp5	6	Lamp5 Lsp1	Core	0	0	0	0	0	0	0	0	22.01208023	0	0	0	0	0	136.9640548	0	0	21.03376555	0	0	0	0	19.0771362	0	0	0	0	0	0
F2S4_160415_011_E01	VISp	L6	GABAergic	Lamp5	6	Lamp5 Lsp1	Core	0	0	0	0	0	2.315601691	0	0	32.41842367	0	0	0	0	0	18.06169319	0	0	16.67233217	0	15.28297116	180.1538115	0	23.15601691	0.463120338	0	0	0	0	0
F2S4_160415_012_C01	VISp	L6	GABAergic	Lamp5	6	Lamp5 Lsp1	Core	0	0	0	0	0	0	0	0	11.80639867	31.4837298	0	0	0	0	78.05341346	0	0	0	0	0	45.91377262	0	102.3221218	0	0	0	0	0	0
F2S4_160415_013_A01	VISp	L6	GABAergic	Lamp5	6	Lamp5 Lsp1	Core	0	0	0	0	0	0	0	0	8.808680955	0	0	0	0	0	99.09766074	0	0	0	0	0	0	0	62.7618518	0	0	0	0	0	0
F2S4_160415_013_H01	VISp	L6	GABAergic	Lamp5	6	Lamp5 Lsp1	Core	0	0	3.193245647	0	0	14.36960541	0	0	0	0	0	0	0	0	80.62945258	0	0	0	0	0	0	0	32.73076788	0	0	0	0	0	0
F2S4_160415_014_E01	VISp	L6	GABAergic	Lamp5	6	Lamp5 Lsp1	Core	0	0	4.662365479	0	0	5.128602027	0	0	0	22.84559085	0	0	0	0	138.0060182	0	0	0	0	0	0	0	0	0	0	0	0	0	0
F2S4_160415_017_F01	VISp	L1	GABAergic	Lamp5	6	Lamp5 Lsp1	Core	0	0	0	0	0	7.10815051	24.87852679	0	44.67980321	0	0	0	0	0	85.80553116	0	0	0	0	0	0	0	0	0	0	0	0	0	0
F2S4_160415_017_G01	VISp	L1	GABAergic	Lamp5	6	Lamp5 Lsp1	Core	0	0	0	0	0	9.895597148	50.33847245	0	0	0	0	0	0	0	43.45457878	0	0	0	0	0	0	0	120.0378958	0	0	0	0	0	0
F2S4_160415_018_B01	VISp	L1	GABAergic	Lamp5	6	Lamp5 Lsp1	Core	0	0	0	0	0	0	34.4785283	0	0	0	0	0	0	0	97.82280121	0	0	0	0	0	0	0	0	0	0	0	0	0	0
F2S4_160415_020_A01	VISp	L1	GABAergic	Lamp5	6	Lamp5 Lsp1	Core	0	0	16.63234356	0	0	61.23726492	0	0	0	0	0	0	0	0	0	0	0	0	0	0	0	0	201.8561695	0	0	0	0	0	0
F2S4_160415_020_G01	VISp	L1	GABAergic	Lamp5	6	Lamp5 Lsp1	Core	0	0	0	0	0	97.93558883	0	0	0	0	0	0	0	0	0	0	0	0	0	37.55043302	0	0	72.56367462	0	0	0	0	0	0
F2S4_160415_022_B01	VISp	L1	GABAergic	Lamp5	6	Lamp5 Lsp1	Intermediate	40.21142655	0	0	0	0	73.15057383	0	0	9.411184937	0	0	0	0	0	115.9286872	0	0	0	82.13397763	32.93914728	0	0	154.0012081	0	0	0	0	0	0
F2S4_160415_022_E01	VISp	L1	GABAergic	Lamp5	6	Lamp5 Lsp1	Core	0	0	0	0	0	56.84446064	46.50910416	0	0	0	0	20.02475318	0	0	94.31012787	0	0	0	0	0	0	0	7.75151736	0	0	0	0	0	0
F2S4_160415_022_F01	VISp	L1	GABAergic	Lamp5	6	Lamp5 Lsp1	Core	0	0	0	0	0	0	137.1436913	0	0	0	0	0	0	0	0	0	0	0	0.588599533	0	0	0	107.1251151	0	0	0	0	0	0
F2S4_160415_022_H01	VISp	L1	GABAergic	Lamp5	6	Lamp5 Lsp1	Core	0	0	0	0	0	0	0	0	6.579943018	0	0	0	0	0	96.06716806	0	0	0	0	27.63576067	0	0	39.47965811	0	0	0	0	0	0
F2S4_160415_023_H01	VISp	L1	GABAergic	Lamp5	6	Lamp5 Lsp1	Core	0	0	0	0	0	30.68129107	43.16181625	0	0	0	0	0	0	0	20.8008753	0	0	92.04387321	0	0	0	0	9.880415768	0	0	0	0	0	0
F2S4_160419_002_F01	VISp	L1	GABAergic	Lamp5	6	Lamp5 Lsp1	Core	0	0	0	0	0	43.56492367	18.50017307	0	0	0	0	0	0	0	46.54882255	0	0	0	0.596779776	164.7112183	0	0	2.387119105	0	0	0	0	0	0
F2S4_160419_003_D01	VISp	L1	GABAergic	Lamp5	6	Lamp5 Lsp1	Core	0	0	0	0	0	10.96294889	0	0	0	0	0	0	0	0	110.2385416	0	0	0	4.263369012	0	0	0	28.62547765	0	0	0	0	0	0
F2S4_160419_004_H01	VISp	L6	GABAergic	Lamp5	6	Lamp5 Lsp1	Core	0	0	0	0	0	1.344790048	0	0	27.56819598	0	0	0	0	0	68.58429245	0	0	0	0	0	0	0	158.6852257	0	0	0	0	0	0
F2S4_160419_010_C01	VISp	L5	GABAergic	Lamp5	6	Lamp5 Lsp1	Core	0	0	0	0	0	0	0	0	24.99899713	0	0	0	0	0	176.737096	0	0	0	0	0	0	0	48.83525021	0	0	0	0	0	0
F2S4_160419_011_H01	VISp	L2/3	GABAergic	Lamp5	6	Lamp5 Lsp1	Core	0	0	0	0	0	15.94311497	0.637724599	0	0	38.90120052	0	0	0	0	38.26347592	0	0	0	117.9790507	0	0	0	119.2544999	0	0	0	0	0	0
F2S4_160419_012_E01	VISp	L2/3	GABAergic	Lamp5	6	Lamp5 Lsp1	Core	0	0	0	0	0	3.823972703	0	0	0	0	0	0	0	0	80.30342677	0	0	0	31.68434526	0	0.546281815	0	31.13806344	0	0	0	0	0	0
F2S4_160419_014_B01	VISp	L1	GABAergic	Lamp5	6	Lamp5 Lsp1	Core	0	0	0	0	0	21.76114056	0	0	0	0	0	0	0	0	136.2934593	0	0	0	12.59855506	95.63448614	0	0	1.145323187	0	0	0	0	0	0
F2S4_160419_015_F01	VISp	L6	GABAergic	Lamp5	6	Lamp5 Lsp1	Core	0	0	0	0	0	14.1632066	0	0	24.92724361	0	0	0	0	0	22.09460229	0	0	11.33056528	0	0	0	0	61.75158076	0	0	0	0	0	0
F2S4_160419_022_A01	VISp	L2/3	GABAergic	Lamp5	6	Lamp5 Lsp1	Core	0	0	0	0	0	20.82489181	0	0	0	0	0	0	0	0	145.7742427	0	0	0	0	0	0	0	38.07980218	0	0	0	0	0	0
F2S4_160419_023_E01	VISp	L2/3	GABAergic	Lamp5	6	Lamp5 Lsp1	Core	0	0	0	0.550539226	0	39.63882425	0	0	0	0	0	0	0	0	33.03235354	0	0	25.32480438	0	0	0	0	104.6024529	0	0	0	0	0	0
F2S4_160422_008_G01	VISp	L2/3	GABAergic	Lamp5	6	Lamp5 Lsp1	Core	0	0	0	0	0	56.74269777	0	0	0	0	0	0	0	0	30.8384227	0	0	0	0	0	0	0	57.35946622	0	39.47318106	0	0	0	0
F2S4_160422_010_A01	VISp	L2/3	GABAergic	Lamp5	6	Lamp5 Lsp1	Core	0	0	81.23967973	0	0	18.42062505	0	0	10.86344554	0	0	0	0	0	32.11801292	0	0	0	0	0	0	0	19.83759621	0	0	0	0	0	0
F2S4_160422_010_D01	VISp	L2/3	GABAergic	Lamp5	6	Lamp5 Lsp1	Core	0	0	0	0	0	3.54743482	75.08737036	0	0	0	0	0	0	0	92.23330533	0	0	13.00726101	5.912391367	38.43054389	0	0	97.55445756	0	0	0	0	0	0
F2S4_160422_010_F01	VISp	L2/3	GABAergic	Lamp5	6	Lamp5 Lsp1	Core	0	0	0	0	0	18.77053027	0	0	0	0	0	0	0	0	40.99878979	0	0	0	7.409419842	0	0	0	29.63767937	0	0	0	0	0	0
F2S4_160429_002_D01	VISp	L1	GABAergic	Lamp5	6	Lamp5 Lsp1	Core	0	0	0	0	0	0	13.83030928	0	0	0	0	0	0	0	61.98027491	0	0	0	37.39305841	0	0	0	0.512233677	0	0	0	0	0	0
F2S4_160429_002_E01	VISp	L1	GABAergic	Lamp5	6	Lamp5 Lsp1	Core	0	0	0.945969531	0	0	95.54292266	0	0	0	0	0	0	0	0	44.46056797	0	0	0	0	0	0	0	14.18954297	0	0	0	0	0	0
F2S4_160429_003_A01	VISp	L1	GABAergic	Lamp5	6	Lamp5 Lsp1	Core	0	0	0	0	0	0	73.9640027	0	0	0	0	0	0	0	33.86303738	0	0	0	123.4218599	0	0	0	93.56891908	0	0	0	0	0	0
F2S4_160429_003_C01	VISp	L1	GABAergic	Lamp5	6	Lamp5 Lsp1	Core	9.114233242	0	0.569639578	0	0	0	35.31765381	0	0	0	0	0	0	0	43.86224748	0	0	0	0	0	0	0	0	0	0	0	0	0	0
F2S4_160429_003_D01	VISp	L1	GABAergic	Lamp5	6	Lamp5 Lsp1	Intermediate	0	0	0	0	0	78.2410134	76.63332135	0	0	0	0	0	0	0	12.3256391	0	0	0	0	139.8692089	0	0	0	0	0	0	0	0	0
F2S4_160429_004_C01	VISp	L4	GABAergic	Lamp5	6	Lamp5 Lsp1	Core	0	0	0	0	0	0	0	0	0	0	0	0	0	0	39.85699914	0	0	0	0.504518976	0	0	0	118.0574405	0	0	0	0	0	0
F2S4_160429_005_C01	VISp	L5	GABAergic	Lamp5	6	Lamp5 Lsp1	Core	0	0	0	0	0	0	0	0	26.87780885	0	0	0	0	0	136.2426862	0	0	26.41439835	50.97515471	0	0	0	107.9746459	0	0	0	0	0	0
F2S4_160429_006_F01	VISp	L5	GABAergic	Lamp5	6	Lamp5 Lsp1	Core	0	0	12.10131609	0	0	37.27205356	0	0	0	0	0	0	0	0	115.6885818	0	0	12.58536873	0	93.42216022	0	0	47.92121172	0	0	0	0	0	0
F2S4_160429_006_G01	VISp	L5	GABAergic	Lamp5	6	Lamp5 Lsp1	Core	0	0	0	0	0	15.62815519	0	0	0	0	0	0	0	0	156.2815519	0	0	0	0	32.90137935	0	0	35.78025004	0	0	0	0	0	0
F2S4_160429_009_C01	VISp	L1	GABAergic	Lamp5	6	Lamp5 Lsp1	Core	0	0	0	0	0	10.58799364	0	0	24.35238537	0	0	0	0	0	19.05838855	0	0	0	0	233.9946594	0	0	1.058799364	0	0	0	0	0	0
F2S4_160429_010_G01	VISp	L4	GABAergic	Lamp5	6	Lamp5 Lsp1	Core	0	0	0.470326623	0	0	0	0	0	5.643919476	0	0	0	0	0	58.79082788	0	0	0	41.38874283	47.97331555	0	0	47.0326623	0	0	0	0	0	0
F2S4_160429_011_D01	VISp	L4	GABAergic	Lamp5	6	Lamp5 Lsp1	Core	0	0	0	0	0	4.917678069	0	0	0	0	0	0	0	0	92.82117355	0	0	0	0	0	0	0	6.147097586	0	0	0	0	0	0
F2S4_160429_013_A01	VISp	L5	GABAergic	Lamp5	6	Lamp5 Lsp1	Core	0	0	0	0	0	0	0	0	0	0	0	0	0	0	193.1052846	0	0	56.6793668	96.88217348	0	0	0	110.0634216	0	0	0	0	0	0
F2S4_160429_016_D01	VISp	L2/3	GABAergic	Lamp5	6	Lamp5 Lsp1	Core	0	0	0	0	0	0	0	0	51.76013818	0	0	0	0	0	60.83150261	0	0	0	24.54604491	73.63813474	0	0	59.76428326	0	0	0	0	0	0
F2S4_160429_016_F01	VISp	L2/3	GABAergic	Lamp5	6	Lamp5 Lsp1	Core	0	0	0	0	0	11.20617057	0	0	45.94529932	0	0	0	0	0	45.94529932	0	0	0	27.45511789	0	0	0	66.67671487	0	0	0	0	0	0
F2S4_160429_017_C01	VISp	L2/3	GABAergic	Lamp5	6	Lamp5 Lsp1	Core	11.93934811	0	0	0	0	0	0	0	24.37616906	0	0	0	0	0	78.10323556	0	0	24.8736419	0	0	0	0	130.8353564	0	0	0	0	0	0
F2S4_160429_017_H01	VISp	L2/3	GABAergic	Lamp5	6	Lamp5 Lsp1	Core	0	0	0	0	0	13.11446303	0	0	0	0	0	0	0	0	80.7043879	0	0	0	0	0	0	0	116.0125576	0	0	0	0.504402424	0	0
F2S4_160429_020_A01	VISp	L2/3	GABAergic	Lamp5	6	Lamp5 Lsp1	Core	0	0	0	0	0	0	76.03400042	0	37.19054368	0	0	0	0	0	86.77793526	0	0	0	16.11590226	113.2245441	0	0	68.18266342	0	0	0	0	0	0
F2S4_160429_020_G01	VISp	L2/3	GABAergic	Lamp5	6	Lamp5 Lsp1	Core	0	0	0	0	0	5.835258969	43.76444227	0	15.75519922	0	0	0	0	0	60.68669328	0	0	0	0	90.44651402	0	0	85.19478094	0	0	0	0	0	0
F2S4_160429_021_F01	VISp	L2/3	GABAergic	Lamp5	6	Lamp5 Lsp1	Core	0	0	0	0	0	22.21522221	0	0	19.93673788	0	0	0	0	0	100.8229316	0	0	0	0	0	0	0	97.40520508	0	0	0	0	0	0
F2S4_160502_001_C01	VISp	L2/3	GABAergic	Lamp5	6	Lamp5 Lsp1	Core	0	0	0	0	0	5.827407346	44.28829583	0	0	0	0	0	0	0	34.96444407	0	0	0	0	0	0	0	48.9502217	0	0	0	0	0	0
F2S4_160502_001_E01	VISp	L2/3	GABAergic	Lamp5	6	Lamp5 Lsp1	Core	0	0	28.04206778	0	0	0	18.69471185	0	0	0	0	0	0	0	22.19997032	0	0	0	0	0	0	0	43.23152115	0	0	0	50.2420381	0	0
F2S4_160502_002_A01	VISp	L2/3	GABAergic	Lamp5	6	Lamp5 Lsp1	Core	0	0	0	0	0	9.153714963	0	0	0	0	0	0	0	0	114.1805498	0	0	0	0	0	0	0	115.1440987	0	0	0	0	0	0
F2S4_160502_004_C01	VISp	L2/3	GABAergic	Lamp5	6	Lamp5 Lsp1	Core	0	0	0	0	33.2717317	8.317932925	0	0	0	0	0	0	0	0	67.52204375	0	0	0	113.5153199	0	0	0	121.3439627	0	0	0	0	0	0
F2S4_160502_004_D01	VISp	L2/3	GABAergic	Lamp5	6	Lamp5 Lsp1	Core	0	0	0	0	0	0	0	0	0	137.4699317	0	0	0	0	197.5142697	0	0	0	0	54.25058609	0	0	37.39603507	0	0	0	0	0	0
F2S4_160502_006_A01	VISp	L2/3	GABAergic	Lamp5	6	Lamp5 Lsp1	Core	0	0	0	0	0	15.52526523	36.93942416	0	0	0	0	0	0	0	221.636545	0	0	0	0	47.64650363	0	0	142.9395109	0	0	0	0	0	0
F2S4_160502_006_B01	VISp	L2/3	GABAergic	Lamp5	6	Lamp5 Lsp1	Core	0	0	0	0	0	0	0	0	0	0	0	0	0	0	0.508125692	0	0	0	109.7551495	0	0	0	96.03575579	0	0	0	0	0	0
F2S4_160502_006_H01	VISp	L2/3	GABAergic	Lamp5	6	Lamp5 Lsp1	Core	0	0	0	0	0	5.285834434	0	0	0	0	0	0	0	0	101.0181692	0	0	0	58.14417877	56.9695489	0	0	180.3056857	0	0	0	0	0	0
F2S4_160502_007_C01	VISp	L1	GABAergic	Lamp5	6	Lamp5 Lsp1	Core	0	0	0	0	0	28.26929225	0	0	20.55948527	0	0	0	0	0	82.23794109	0	0	0	0	141.8604484	0	0	5.139871318	0	0	0	0	0	0
F2S4_160502_008_H01	VISp	L1	GABAergic	Lamp5	6	Lamp5 Lsp1	Core	0	0	69.73180284	0	0	0	67.02901978	0	0	0	0	0	0	0	176.2214552	0	0	0	0	0	0	0	1.081113222	0	0	0	0	0	0
F2S4_160502_009_G01	VISp	L2/3	GABAergic	Lamp5	6	Lamp5 Lsp1	Core	0	0	0.488327031	0	0	16.60311904	0	0	0	0	0	0	0	0	119.1517955	0	0	0	73.73738163	0	0	0	37.11285433	0	0	0	0	0	0
F2S4_160502_010_F01	VISp	L2/3	GABAergic	Lamp5	6	Lamp5 Lsp1	Core	0	0	0	0	0	6.511240261	26.51004963	0	0	0	0	0	0	0	30.23075835	0	0	0	54.41536504	58.13607376	0	0	41.85797311	0	0	0	0	0	0
F2S4_160502_011_H01	VISp	L2/3	GABAergic	Lamp5	6	Lamp5 Lsp1	Core	0	0	0	0	0	0	0	0	0	0	0	0	0	0	95.26933671	0	0	0	0	0	0	0	20.59877551	0	0	0	0	0	0
F2S4_160502_013_B01	VISp	L2/3	GABAergic	Lamp5	6	Lamp5 Lsp1	Core	0	0	0	0	0	0.574245327	0	0	0	0.574245327	0	0	0	0	85.56255369	0	0	0	0	0	0	0	203.2828457	0	0	0	0	0	0
F2S4_160502_013_E01	VISp	L2/3	GABAergic	Lamp5	6	Lamp5 Lsp1	Core	0	0	0	0	0	6.962840925	54.6315211	0	0	0	0	0	0	0	19.81731648	0	0	0	0	49.27548962	0	0	83.01848795	0	0	0	0	0	0
F2S4_160502_013_F01	VISp	L2/3	GABAergic	Lamp5	6	Lamp5 Lsp1	Core	0	0	107.1834603	0	0	8.673806035	84.25983006	0	0	0	0	0	0	0	110.9008057	0	0	0	0	0	0	0	22.30407266	0	0	0	0	0	0
F2S4_160502_014_D01	VISp	L2/3	GABAergic	Lamp5	6	Lamp5 Lsp1	Core	0	0	0	0	0	11.60602686	0	0	36.83652003	0	0	0	0	0	45.91949757	0	0	0	23.71666358	0	0	0	24.72588331	0	0	0	0.504609863	0	0
F2S4_160502_015_E01	VISp	L6	GABAergic	Lamp5	6	Lamp5 Lsp1	Core	0	0	0	0	0	0.484465845	0	0	0	8.235919364	0	0	0	0	34.88154083	0	0	0	29.55241654	0	63.94949153	0	100.7688957	0	0	4.360192604	0	0	0
F2S4_160502_018_H01	VISp	L1	GABAergic	Lamp5	6	Lamp5 Lsp1	Intermediate	0	0	0	0	0	23.4092849	0	0	59.39022281	0	0	0	0	0	66.32630722	0	0	19.07423214	10.40412662	0	0	0	15.17268466	0	5.202063312	13.00515828	0	0	0
F2S4_160502_019_B01	VISp	L1	GABAergic	Lamp5	6	Lamp5 Lsp1	Core	0	0	0	0	0	0	0	0	0	0	0	0	0	0	118.8643145	0	0	0	6.025379996	0	0	0	38.34332725	0	0	0	0.547761818	0	0
F2S4_160502_020_A01	VISp	L1	GABAergic	Lamp5	6	Lamp5 Lsp1	Core	0	0	0	0	0	53.06569259	56.34810657	0	0	0	0	0	0	0	175.6091477	0	0	0	27.90051879	0	0	0	94.09586728	0	0	0	0	0	0
F2S4_160502_020_B01	VISp	L1	GABAergic	Lamp5	6	Lamp5 Lsp1	Intermediate	0	0	0	0	0	55.37602297	55.37602297	0	0	0	0	0	0	0	60.4615761	0	0	0	0	0	0	0	23.73258127	0	0	0	0	0	0
F2S4_160504_003_B01	VISp	L1	GABAergic	Lamp5	6	Lamp5 Lsp1	Core	0	0	0	0	0	0	10.59132369	0	0	0	0	0	0	0	0	0	0	0	0	0	0	0	37.82615603	0	0	0	0	0	0
F2S4_160504_003_D01	VISp	L1	GABAergic	Lamp5	6	Lamp5 Lsp1	Core	0	0	0	0	0	0	0	0	0	0	0	0	0	0	0	0	0	0	0	0	0	0	57.05316108	0	0	0	0	0	0
F2S4_160504_005_G01	VISp	L1	GABAergic	Lamp5	6	Lamp5 Lsp1	Core	0	0	0	0	0	0	0	0	5.361539319	0	0	0	0	0	105.0861707	0	0	0	1.072307864	0	0	0	30.02462019	0	0	0	0	0	0
F2S4_160504_007_F01	VISp	L6	GABAergic	Lamp5	6	Lamp5 Lsp1	Core	0	0	0	0	0	0	0	0	0	0	0	0	0	0	160.6021482	0	0	0	96.77979615	0	0	0	94.68726001	0	0	0	0	0	0
F2S4_160504_008_F01	VISp	L1	GABAergic	Lamp5	6	Lamp5 Lsp1	Core	0	0	0	0	0	45.89779794	105.120763	0	0	0	0	0	0	0	92.7826453	0	0	0	0	0	0	0	285.2572818	0	0	0	0	0	0
F2S4_160504_009_A01	VISp	L1	GABAergic	Lamp5	6	Lamp5 Lsp1	Core	0	0	0	0	0	37.53894666	0	0	0	28.04633946	0	0	0	0	0	0	0	0	0	0	0	0	1.294446436	0	0	0	0	0	0
F2S4_160504_009_G01	VISp	L1	GABAergic	Lamp5	6	Lamp5 Lsp1	Core	0	0	0	0	0	17.95329292	0	0	10.56076054	0	0	0	0	0	19.00936898	0	0	0	0	0	0	0	91.3505787	0	0	0	0	0	0
F2S4_160504_010_C01	VISp	L1	GABAergic	Lamp5	6	Lamp5 Lsp1	Core	0	0	0	0	0	52.74669803	0	0	0	0	0	0	0	0	124.7188281	0	0	0	0	0	0	0	132.113225	0	0	0	0	0	0
F2S4_160516_008_D01	VISp	L2/3	GABAergic	Lamp5	6	Lamp5 Lsp1	Core	0	0	0	0	0	0	0	0	37.27357758	0	0	0	0	0	92.01914464	0	0	18.05438914	0	0	0	0	20.96638739	0	0	0	0	0	0
F2S4_160516_010_D01	VISp	L2/3	GABAergic	Lamp5	6	Lamp5 Lsp1	Core	0	0	0	0	0	20.45182572	0	0	0	41.40247647	0	0	0	0	24.44242587	0	0	0	0	0	0	0	84.800253	0	0	0	0	0	0
F2S4_160516_011_F01	VISp	L2/3	GABAergic	Lamp5	6	Lamp5 Lsp1	Core	0	0	0	0	0	0	39.31009771	0	11.08746346	0	0	0	0	0	0.503975612	0	0	23.68685375	0	0	0	0	0	0	0	0	0	0	0
F2S4_160516_014_E01	VISp	L2/3	GABAergic	Lamp5	6	Lamp5 Lsp1	Core	0	0	0	0	0	0	180.3927408	0	0	0	0	0	0	0	5.726753675	0	0	0	46.29125887	0	0	0	4.295065256	0	0	0	0	0	0
F2S4_160516_014_G01	VISp	L2/3	GABAergic	Lamp5	6	Lamp5 Lsp1	Core	0	0	13.32602111	0	0	39.46552405	0	0	0	0	0	0	0	0	260.3699508	0	0	25.62696367	0	0	0	0	110.708483	0	0	0	0	0	0
F2S4_160516_015_C01	VISp	L2/3	GABAergic	Lamp5	6	Lamp5 Lsp1	Core	0	0	0	0	0	0	47.08050641	0	0	0	0	0	0	0	34.5257047	0	0	34.5257047	75.32881026	0	0	0	44.56954607	0	0	0	0	0	0
F2S4_160516_019_H01	VISp	L2/3	GABAergic	Lamp5	6	Lamp5 Lsp1	Core	0	0	0	0	0	26.41185167	0	0	0	0	0	0	0	0	162.7707138	0	0	0	0	0	0	0	143.7296114	0	0	0	0	0	0
F2S4_160516_021_G01	VISp	L2/3	GABAergic	Lamp5	6	Lamp5 Lsp1	Core	0	0	0	0	0	65.73088607	0	0	0	0	0	0	0	0	232.2491308	0	0	0	82.28533145	0	0	0	36.03026347	0	0.486895452	0	0	0	0
F2S4_160616_011_G01	VISp	L1	GABAergic	Lamp5	6	Lamp5 Lsp1	Core	0	0	0	0	0	71.44759319	0	0	0	64.95235745	0	0	0	0	47.82855412	0	0	0	0	0	0	0	70.85711721	0	0	0	0	0	0
F2S4_160616_012_F01	VISp	L1	GABAergic	Lamp5	6	Lamp5 Lsp1	Core	0	0	5.263616537	0	0	0	0	0	31.58169922	0	0	0	0	0	248.5596698	0	0	0	59.06947447	0.584846282	0	0	0	0	0	0	0	0	0
F2S4_160802_001_A01	VISp	L1-L4	GABAergic	Lamp5	6	Lamp5 Lsp1	Core	0	0	0	0	0	7.873735126	0	0	0	0	0	0	0	0	18.64832004	0	0	0	0	0	0	0	74.17887303	0	0	0	0	0	0
F2S4_160802_001_B01	VISp	L1-L4	GABAergic	Lamp5	6	Lamp5 Lsp1	Core	0	0	0	0	0	0	7.031880672	0	0	0	1.406376134	0	0	0	136.8872771	0	0	0.93758409	0	0	0	0	145.3255339	0	0	43.12886812	0	0	0
F2S4_160802_001_F01	VISp	L1-L4	GABAergic	Lamp5	6	Lamp5 Lsp1	Core	0	0	0	0	0	0	0	0	20.97930503	0	0	0	0	0	10.71283661	0	0	0	0	0	0	0	28.5675643	0	0	0.446368192	0	0	0
F2S4_160802_001_H01	VISp	L1-L4	GABAergic	Lamp5	6	Lamp5 Lsp1	Core	0	0	0	0	155.9487354	1.466602527	0	0	0	0	0	0	0	0	94.84029676	0.488867509	0	0	0	112.9283946	0	0	189.6805935	0	0	0	0	0	0
F2S4_160802_002_B01	VISp	L1-L4	GABAergic	Lamp5	6	Lamp5 Lsp1	Core	0	0	0	0	0	0	0	0	0	0	0	0	0	0	1.913766632	0	0	0	0	71.76624872	0	0	2.870649949	0	0	0	0	0	0
F2S4_160802_002_C01	VISp	L1-L4	GABAergic	Lamp5	6	Lamp5 Lsp1	Core	0	0	0	0	0	0	56.49329761	0	6.536414599	0	0	0	0	0	92.91046466	0	0	6.536414599	40.61914787	0	0	0	19.14235704	0	0	0	0	0	0
F2S4_160802_002_E01	VISp	L1-L4	GABAergic	Lamp5	6	Lamp5 Lsp1	Core	0	0	0	0	0	3.070390231	89.04131671	0	0	0	0	0	1.535195116	0	95.18209717	0	0	0	0	30.70390231	0	0	1.535195116	0	0	0	0	0	0
F2S4_160802_002_F01	VISp	L1-L4	GABAergic	Lamp5	6	Lamp5 Lsp1	Core	0	0	0	0	0	12.15582647	12.15582647	0	0	169.7140389	0	0	0	0	74.805086	0	0	0	136.9868137	0	0	0	158.9608077	0	0	0	0	0	0
F2S4_160802_002_G01	VISp	L1-L4	GABAergic	Lamp5	6	Lamp5 Lsp1	Core	0	0	22.91642336	0	0	5.288405392	117.66702	0	4.847704942	0	0	0	0	0	26.88272741	0	0	20.71292112	0	0	0	0	54.20615526	0	0	0	84.17378582	0	0
F2S4_160802_005_B01	VISp	L1-L4	GABAergic	Lamp5	6	Lamp5 Lsp1	Core	0	0	0	0	0	0	0	0	0	0	0	0	0	0	58.59033418	0	0	0	88.10576569	0	0	0	32.5991333	0	0	0	0	0	0
F2S4_160802_006_D01	VISp	L1-L4	GABAergic	Lamp5	6	Lamp5 Lsp1	Core	0	0	0	0	0	26.76906654	0	0	0	0	0	0	0	0	116.3634933	0	0	0	0	0	0	0	0	0	0	0	0	0	0
F2S4_160802_006_E01	VISp	L1-L4	GABAergic	Lamp5	6	Lamp5 Lsp1	Core	0	0	63.87883926	0	0	0	31.10982432	0	0	0	0	0	0	0	12.85872738	0	0	0	0	0	0	0	27.3766454	0	0	0	87.52230574	0	0
F2S4_160802_006_F01	VISp	L1-L4	GABAergic	Lamp5	6	Lamp5 Lsp1	Core	0	0	0	0	0	22.33160851	0	0	0	0	0	0	0	0.496257967	127.5382975	0	0	0	60.04721398	45.15947498	0	0	156.8175175	0	0	0	0	0	0
F2S4_160802_007_A01	VISp	L1-L4	GABAergic	Lamp5	6	Lamp5 Lsp1	Core	0	0	0	0	0	60.39530615	2.359191647	0	0.471838329	0	0	0	0	0	48.59934792	0	0	0	0.471838329	0	0	0	46.7119946	0	0	0	0	0	0
F2S4_160802_007_C01	VISp	L1-L4	GABAergic	Lamp5	6	Lamp5 Lsp1	Core	0	0	0	0	0	0	43.04209209	0	0	0	0	0	0	0	43.42639649	0	0	0	0.384304394	0	0	0	97.99762039	0	7.686087874	0	0	0	0
F2S4_160802_007_E01	VISp	L1-L4	GABAergic	Lamp5	6	Lamp5 Lsp1	Core	0	0	0	0	0	0	0.390843017	0	0	0	0	0	0	0	123.8972364	0	0	0	152.0379337	0	0	0	53.15465033	0	0	0	0	0	0
F2S4_160802_007_G01	VISp	L1-L4	GABAergic	Lamp5	6	Lamp5 Lsp1	Core	0	0	4.77668405	0	0	25.07759126	0	0	0	1.194171012	0	0	0	0	65.67940568	0	0	0	21.09702122	0	0	0	0.796114008	0	0	0	0	0	0
F2S4_160901_007_F01	VISp	L1-L6	GABAergic	Lamp5	6	Lamp5 Lsp1	Core	0	0	0	0	0	32.43005873	28.70857658	0	0	0	0	0	0	0	132.9100768	0	0	0	51.56910978	0	0	1.594920921	7.974604606	0	0	0	0	0	0
F2S4_160901_013_A01	VISp	L1-L6	GABAergic	Lamp5	6	Lamp5 Lsp1	Core	0	0	0	0	0	23.27007411	0	0	7.756691371	21.22883954	0	0	0	0	143.7029138	0	0	0	30.61851857	0	0	0	17.55461731	0	0	0	0	0	0
F2S4_161004_016_G01	VISp	L1-L2/3	GABAergic	Lamp5	6	Lamp5 Lsp1	Core	0	0	0	0	0	1.33275403	45.75788835	0	0	0	0	0	0	0	42.64812895	0	0	0	0	0	0	0	75.078477	0	0	0	41.31537492	0	0
F2S4_161103_008_B01	VISp	L5-L6	GABAergic	Lamp5	6	Lamp5 Lsp1	Core	0	0	0	0	0	32.64141533	0	0	0.960041627	0	0	0	0	0	171.3674305	0	0	0	34.56149859	0	0	0	17.76077011	0	0	0	0	0	0
F2S4_170320_003_H01	VISp	L1-L6	GABAergic	Lamp5	6	Lamp5 Lsp1	Core	0	0	0	0	0	0	93.38902325	0	0	0	0	0	0	0	90.70543063	0	0	0	0	0	0	0	11.80780754	0	0	0	0	0	0
F2S4_170406_007_D01	VISp	L5-L6	GABAergic	Lamp5	6	Lamp5 Lsp1	Core	0	0	48.54463193	0	15.84087989	16.35187602	0	0	2.043984503	0	0	0	0	0	53.65459319	0	0	0	0	10.21992251	0	0	14.30789152	0	0	0	0	0	0
F2S4_170406_008_D01	VISp	L5-L6	GABAergic	Lamp5	6	Lamp5 Lsp1	Core	0	0	0	0	0	1.488200062	33.73253473	0	32.74040136	47.62240197	0	0	0	0	66.96900278	0	0	0	0	0	0	0	112.607138	0	21.33086755	0	0	0	0
F2S4_170406_009_A01	VISp	L5-L6	GABAergic	Lamp5	6	Lamp5 Lsp1	Core	0	0	0	0	0	14.36487276	0	0	8.743835596	0	0	0	0	0	0	0	0	0	0	0	24.35782773	0	0	0	0	0	0	0	0
F2S4_170406_014_A01	VISp	L2/3-L4	GABAergic	Lamp5	6	Lamp5 Lsp1	Core	0	0	38.2944411	0	0	17.79882474	33.44021617	0	11.86588316	0	0	0	0	0	13.48395814	0	0	0	0	0	0	0	0.539358325	0	0	15.10203311	60.94749077	0	0
F2S4_170406_014_C01	VISp	L2/3-L4	GABAergic	Lamp5	6	Lamp5 Lsp1	Core	0	0	0	0	0	0	43.00284992	0	0	0	0	0	0	0	41.69973325	0	0	0	0	18.2436333	0	0	36.4872666	0	0	0	0	0	0
F2S4_170406_018_G01	VISp	L2/3-L4	GABAergic	Lamp5	6	Lamp5 Lsp1	Core	0	0	0	0	0	7.259159244	0	0	0	0	0	0	0	0	40.96239859	0	0	0	0	0	0	0	93.8505588	0	13.48129574	0	0	0	0
F2S4_170412_001_D01	VISp	L1-L4	GABAergic	Lamp5	6	Lamp5 Lsp1	Core	0	0	44.03365394	0	25.68629813	15.9010417	0	0	0	0	0.611578527	0	0	0	180.4156655	0	0	0	0	0	0	0	6.727363797	0	0	0	0	0	0
F2S4_170707_004_H01	VISp	L1	GABAergic	Lamp5	6	Lamp5 Lsp1	Core	0	0	0	0	0	0	4.923646551	0	0	0	0	0	0	0	0	0	0	0	19.20222155	0	0	0	63.51504051	0	0	0	0	0	0
F2S4_170707_006_A01	VISp	L2/3	GABAergic	Lamp5	6	Lamp5 Lsp1	Core	0	0	0	0	0	0	92.94915588	0	11.61864449	0	0	0	0	0	0	0	0	0	0	0	0	0	10.68915293	0	0	24.16678053	0	0	0
F2S4_170707_006_D01	VISp	L2/3	GABAergic	Lamp5	6	Lamp5 Lsp1	Core	0	0	0	0	0	0	0	0	0	0	0	0	0	0	115.2368682	0	0	0	0	0	0	0	0	0	0	0	0	0	0
F2S4_170707_021_D01	VISp	L1	GABAergic	Lamp5	6	Lamp5 Lsp1	Core	0	0	0	0	0	0	0	0	0	0	0	0	0	0	43.52833007	0	0	0	0	0	0	0	18.32771792	0	0	0	0	0	0
F2S4_170707_022_C01	VISp	L1	GABAergic	Lamp5	6	Lamp5 Lsp1	Core	0	0	0	0	0	0	0	0	0	0	0	0	0	0	20.33739742	0	0	0	0	0	0	0	53.38566824	0	0	0	0	0	0
F2S4_170707_028_E01	VISp	L5	GABAergic	Lamp5	6	Lamp5 Lsp1	Core	0	0	0	0	0	0	0	0	0	0	0	0	0	0	25.53332738	0	0	33.51249218	8.511109125	0	0	0	0	0	0	0	0	0	0
F2S4_170707_030_C01	VISp	L6	GABAergic	Lamp5	6	Lamp5 Lsp1	Core	0	0	0	0.565462458	0	0	0	0	0	0	0	0	0	0	0	0	0	0	0	5.08916212	81.42659393	0	22.05303585	0	0	0	0	0	0
F2S4_170707_035_G01	VISp	L2/3	GABAergic	Lamp5	6	Lamp5 Lsp1	Core	0	0	0	0	0	2.077875663	0	0	0	0	0	0	0	0	48.83007808	0	0	0	0	0	0	0	72.72564821	0	0	0	0	0	0
F2S4_170707_036_G01	VISp	L2/3	GABAergic	Lamp5	6	Lamp5 Lsp1	Core	0	0	0	0	18.31441861	0	0	0	0	0	0	0	0	0	44.95357295	0	0	0	0	0	0	0	97.67689925	0	0	0	0	0	0
F2S4_170707_037_B01	VISp	L4	GABAergic	Lamp5	6	Lamp5 Lsp1	Core	0.56285041	0	0	0	0	0	48.96798563	0	0	85.55326225	0	0	0	0	37.71097744	0	0	0	0	0	0	0	22.51401638	0	0	0	0	0	0
F2S4_170807_005_A01	VISp	L1-L4	GABAergic	Lamp5	6	Lamp5 Lsp1	Core	0	0	33.02577273	0	101.991357	0	68.96558423	0	0	0	0	0	0	0	1.942692514	0	0	0	0	0	0	0	44.68192781	0	0	0	68.96558423	0	0
F2S4_170807_007_F01	VISp	L1-L4	GABAergic	Lamp5	6	Lamp5 Lsp1	Core	0	0	0	0	0	12.97726599	35.68748148	0	0	0	0	0	0	0	57.31625814	0	0	0	0	0	0	0	34.60604265	0	0	0	0	0	0
F2S4_170807_009_C01	VISp	L1-L4	GABAergic	Lamp5	6	Lamp5 Lsp1	Core	0	0	0	0	0	0	100.6799456	0	0	0	0	0	0	0	77.28965519	0	0	0	0	41.69573503	0	0	3.050907442	0	0	0	0	0	0
F2S4_170807_010_H01	VISp	L1-L4	GABAergic	Lamp5	6	Lamp5 Lsp1	Core	0	0	0	0	0	0	15.89769831	0	62.5971871	0	0	0	0	0	174.8746814	0	0	0	0	0	0	0	38.75063963	0	0	0	0	0	0
F2S4_170807_011_D01	VISp	L1-L4	GABAergic	Lamp5	6	Lamp5 Lsp1	Core	0	0	1.326574877	0	0	0	0	0	0	0	0	0	0	0	118.065164	0	0	0	0	87.55394185	0	0	126.0246133	0	0	0	0	0	0
F2S4_170807_012_F01	VISp	L1-L4	GABAergic	Lamp5	6	Lamp5 Lsp1	Core	0	0	0	0	0	0	122.3229673	0	0	0	0	0	0	0	95.26036389	0	0	0	0	119.0754549	0	0	0	0	0	1.082504135	0	0	0
F2S4_170807_020_C01	VISp	L5-L6	GABAergic	Lamp5	6	Lamp5 Lsp1	Core	0	0	0	0	0	77.40270909	180.6063212	0	0	0	0	0	0	0	0	0	0	0	0	0	0	0	0	0	0	0	0	0	0
F2S4_170807_021_A01	VISp	L5-L6	GABAergic	Lamp5	6	Lamp5 Lsp1	Intermediate	0	0	0	0	0	12.39502368	0	0	12.39502368	0	0	0	0	0	74.3701421	0	0	0	0	348.0141265	0	0	115.3690666	0	0	0	25.74351073	0	0
F2S4_170828_003_B01	VISp	L5	GABAergic	Lamp5	6	Lamp5 Lsp1	Core	0	0	0	0	0	0	0	0	41.03558905	0	0	0	0	0	26.11355667	0	0	0	0	8.704518889	0	0	1.243502698	0	0	0	0	0	0
F2S4_170828_006_B01	VISp	L5	GABAergic	Lamp5	6	Lamp5 Lsp1	Core	0	0	1.049675913	0	0	0	0	0	0	54.58314745	0	0	0	0	108.116619	0	0	0	0	0	0	0	0	0	0	0	0	0	0
F2S4_170828_006_G01	VISp	L5	GABAergic	Lamp5	6	Lamp5 Lsp1	Core	0	0	0	0	47.07644797	0	0	0	0	0	0	0	0	0	72.18388688	0	0	0	0	66.95317044	0	0	86.82989292	0	15.69214932	0	0	0	0
F2S4_170828_007_D01	VISp	L5	GABAergic	Lamp5	6	Lamp5 Lsp1	Core	0	0	26.62312307	0	65.44851088	3.327890384	0	0	0	0	0	0	0	0	185.2525647	0	0	0	0	0	0	0	24.40452948	0	0	0	0	0	0
F2S4_171003_016_B01	VISp	L5-L6	GABAergic	Lamp5	6	Lamp5 Lsp1	Core	0	0	0	0	0	13.186966	0	0	0	0	0	0	0	0	79.12179602	0	0	0	0	56.34430928	0	0	81.5194262	0	0	0	0	0	0
F2S4_171114_001_B01	VISp	L1-L6	GABAergic	Lamp5	6	Lamp5 Lsp1	Intermediate	0	0	0	0	0	2.240775846	49.29706862	0	0	0	0	0	0	0	53.77862031	0	0	0	0	77.30676669	0	0	99.71452516	0	0	0	0	0	0
F2S4_171120_026_A01	VISp	L6	GABAergic	Lamp5	6	Lamp5 Lsp1	Core	0	0	0	0	0	0	0	0	0	0	0	0	0	0	20.97415146	0	0	0	0	0	0	0	102.0742038	0	0	37.75347262	0	0	0
F2S4_171122_010_C01	VISp	L5-L6	GABAergic	Lamp5	6	Lamp5 Lsp1	Core	0	0	0	0	0	3.933647238	4.917059048	4.917059048	0	0	0	0	0	0	88.50706286	0	0	0	0	0	0	0	29.50235429	0	0	0	0	0	0
F2S4_171122_011_A01	VISp	L5-L6	GABAergic	Lamp5	6	Lamp5 Lsp1	Core	0	0	0	0	0	0	35.07714127	0	0	0	0	3.792123381	0	0	96.6991462	0	0	0	62.57003578	144.1006885	0	0	116.607794	0	0	31.28501789	0	0	0
F2S4_171122_011_E01	VISp	L1-L4	GABAergic	Lamp5	6	Lamp5 Lsp1	Core	0	0	5.946434518	0	50.96943872	0	0	0	0	0	0	0	0	0	29.73217259	0	0	17.83930355	0	0	0	0	43.32402292	0	0	0.849490645	26.33421001	0	0
F2S4_171122_012_E01	VISp	L1-L4	GABAergic	Lamp5	6	Lamp5 Lsp1	Intermediate	0	0	0	0	0	0	126.5699542	0	0	0	0	0	0	0	0	0	0	0	46.73352157	0	0	0	18.49868562	0	0	0	49.65436666	0	0
F2S4_171122_013_E01	VISp	L1-L4	GABAergic	Lamp5	6	Lamp5 Lsp1	Core	0	0	0	0	0	0	116.3796615	0	18.75005657	0	0	0	0	0	83.40542407	0	0	0	0	0	0	0	9.051751449	0	0	0	0	0	0
F2S4_171129_007_D01	VISp	L5-L6	GABAergic	Lamp5	6	Lamp5 Lsp1	Core	0	0	0	0	0	6.353098883	0	0	0	0	0	0	0	0	0	0	0	0	0	0	0	0	6.353098883	0	0	1.588274721	0	0	0
FYS4_171004_103_A01	VISp	L5	GABAergic	Lamp5	6	Lamp5 Lsp1	Core	0	0	0	0	0	13.06371282	0	0	34.83656751	0	0	0	0	0	0	0	0	0	0	0	0	0	48.98892306	0	0	0	0	0	0
F2S4_160420_015_H01	ALM	L6	GABAergic	Lamp5	7	Lamp5 Lhx6	Core	0	0	0	0	0	0	0	0	0	0	0	0	0	0	34.05489507	45.40652676	0	0	95.06991541	557.6489068	0	0	19.86535546	0	0	0	0	0	0
F2S4_160517_016_H01	ALM	L6	GABAergic	Lamp5	7	Lamp5 Lhx6	Core	0	0	0	0	0	0	0	0	0	0	0	0	0	0	3.235095798	0	0	0	0	323.5095798	0	0	87.80974309	0	0	24.03214021	0	0	0
F2S4_160524_005_C01	ALM	L2/3	GABAergic	Lamp5	7	Lamp5 Lhx6	Core	0	0	0	0	0	2.761471671	0	0	0	0	0	0	0	0	77.32120679	0	0	0	0	190.5415453	0	0	20.02066962	0	0	0	0	0	0
F2S4_160525_002_E01	ALM	L1	GABAergic	Lamp5	7	Lamp5 Lhx6	Core	0	0	0	0	0	0	0	0	0	0	0	0	0	0	0	0	0	0	0	812.8280639	0	0	0	0	0	0	0	0	1.750841279
F2S4_160531_001_D01	ALM	L2/3	GABAergic	Lamp5	7	Lamp5 Lhx6	Core	0	0	0	0	0	39.65514261	144.385391	0	0	0	0	0	0	0	66.09190435	37.62154555	0	0	0	37.62154555	0	0	34.0627507	0	0	0	0	0	0
F2S4_160531_014_F01	ALM	L6	GABAergic	Lamp5	7	Lamp5 Lhx6	Core	0	0	0	0	0	0	0	0	0	0	0	0	0	0	172.8732983	36.01527047	0	0	24.61043482	112.8478475	0	0	119.4506471	0	0	0	0	0	0
F2S4_160601_015_D01	ALM	L1	GABAergic	Lamp5	7	Lamp5 Lhx6	Core	0	0	0	0	0	0	0	0	0	0	0	0	0	0	90.44256206	0	0	0	0	0	0	0	0	0	0	0	0	0	0
F2S4_160602_012_B01	ALM	L6	GABAergic	Lamp5	7	Lamp5 Lhx6	Core	0	0	0	0	0	0	0	0	0	0	0	0	0	0	96.33329993	63.6685603	0	0	0	362.6339739	0	0	100.2087775	0	0	0	0	0	0
F2S4_160613_020_C01	ALM	L6	GABAergic	Lamp5	7	Lamp5 Lhx6	Core	0	0	0	0	0	0	0	0	0	0	0	0	0	0	51.40082362	289.0540434	0	0	0	0	0	0	137.2704349	0	0	0	0	0	0
F2S4_160623_028_D01	ALM	L2/3	GABAergic	Lamp5	7	Lamp5 Lhx6	Core	0	0	0	0	0	0	0	0	0	0	0	0	0	0	2.444155627	0	0	0	125.8740148	430.1713903	0	0	3.66623344	0	0	0	0	0	0
F2S4_160629_012_A01	ALM	L1	GABAergic	Lamp5	7	Lamp5 Lhx6	Core	0	0	0	0	0	0	0	0	0	0	0	0	0	0	42.09022261	9.414918215	0	0	0	317.3381257	0	0	14.39928668	0	0	0	0	0	0
F2S4_160630_003_A01	ALM	L1	GABAergic	Lamp5	7	Lamp5 Lhx6	Core	0	0	0	0	0	0	0	0	0	0	0	0	0	0	42.36975104	59.20901107	0	0	24.98728907	248.7864869	0	0	23.35768327	0	0	0	0	0	0
F2S4_160708_003_G01	ALM	L6	GABAergic	Lamp5	7	Lamp5 Lhx6	Core	0	0	0	0	0	0	0	0	2.762670574	0	0	0	0	0	70.7243667	150.8418134	0	0	0	0	0	0	1.10506823	0	0	37.01978569	0	0	0
F2S4_161011_001_E01	ALM	L5-L6	GABAergic	Lamp5	7	Lamp5 Lhx6	Core	0	0	102.7451036	0	50.40325838	0	0	0	0	0	0	0	0	0	36.83315035	0.64619562	0	0	0.64619562	0	0	0	34.24836787	0	0	0	0	0	0
F2S4_161011_002_D01	ALM	L5-L6	GABAergic	Lamp5	7	Lamp5 Lhx6	Core	0	0	0	0	37.31072726	0	11.96759176	0	0	0	0	0	0	0	53.50217493	0	0	0	0	0	0	0	7.743735846	0	0	0	0	0	0
F2S4_161011_004_F01	ALM	L5-L6	GABAergic	Lamp5	7	Lamp5 Lhx6	Intermediate	0	0	0	0	0	9.942410052	6.433324151	0	0	0	0	0	0	0	76.03019451	0	0	0	0	82.46351867	0	0	37.43024961	0	0	0	0	0	0
F2S4_161011_005_F01	ALM	L5-L6	GABAergic	Lamp5	7	Lamp5 Lhx6	Intermediate	0	0	0	0	0	0	0	0	0	0	0	0	0	0	29.88242711	71.33224536	0	0	0	226.5280765	0	0	0	0	0	0	0	0	0
F2S4_161011_007_F01	ALM	L1-L2/3	GABAergic	Lamp5	7	Lamp5 Lhx6	Core	0	0	0	0	0	0	0	0	0	0	0	0	0	0	28.11120794	0	0	0	0	0	0	0	54.9446337	0	0	1.916673269	0	0	0
F2S4_161104_001_G01	ALM	L5-L6	GABAergic	Lamp5	7	Lamp5 Lhx6	Core	0	0	0	0	0	0	0	0	0	0	0	0	0	0	0	0	0	0	0	318.1872064	0	0	0	0	0	0	0	0	0
F2S4_161104_001_H01	ALM	L5-L6	GABAergic	Lamp5	7	Lamp5 Lhx6	Core	0	0	0	0	0	0	0	0	0	0	0	0	0	0	74.13745083	76.14116572	0	0	47.08729985	472.8767134	0	0	87.66252632	0	0	0	0	0	0
F2S4_161104_002_D01	ALM	L5-L6	GABAergic	Lamp5	7	Lamp5 Lhx6	Core	0	0	0	0	0	62.02621463	0	0	0	0	0	0	0	0	46.51966097	0	0	0	1.069417494	502.626222	0	0	98.92111816	0	0	0	0	0	0
F2S4_161104_002_F01	ALM	L5-L6	GABAergic	Lamp5	7	Lamp5 Lhx6	Core	0	0	0	0	0	0	0	0	0	0	0	0	0	0	54.86826628	26.75394802	0	0	32.19542897	0	0	0	77.54110359	0	0	0	0	0	0
F2S4_161104_002_G01	ALM	L5-L6	GABAergic	Lamp5	7	Lamp5 Lhx6	Core	0	0	0	0	0	0	25.41892341	0	0	0	0	0	0	0	7.332381753	97.27626459	0	0	0	0	0	0	94.83213734	0	0	0	0	0	0
F2S4_161104_002_H01	ALM	L5-L6	GABAergic	Lamp5	7	Lamp5 Lhx6	Core	0	0	0	0	0	0.937778843	0	0	0	0	0	0	0	0	23.44447107	75.49119684	0	0	0	0	0	0	66.11340841	0	0	0	0	0	0
F2S4_161104_003_A01	ALM	L5-L6	GABAergic	Lamp5	7	Lamp5 Lhx6	Core	0	0	0	65.62695499	0	0	0	0	0	0	0	0	0	0	92.02040428	153.3673405	0	0	0	0	0	0	192.6008462	0	0	0	0	0	0
F2S4_161104_003_B01	ALM	L5-L6	GABAergic	Lamp5	7	Lamp5 Lhx6	Core	0	0	0	0	0	0	0	0	0	0	0	0	0	0	0	3.885471832	0	19.98242657	0	94.91652619	0	0	89.92091955	0	0	0	0	0	0
F2S4_161104_003_C01	ALM	L5-L6	GABAergic	Lamp5	7	Lamp5 Lhx6	Core	0	0	0	0	0	0	0	0	0	0.657073827	0	0	0	0	115.6449935	0	0	0	0	79.50593305	0	0	74.90641626	0	0	0	0	0	0
F2S4_161104_003_G01	ALM	L1-L2/3	GABAergic	Lamp5	7	Lamp5 Lhx6	Core	0	0	0	0	0	0	0	1.217039527	0	0	0	0	0	0	87.01832618	0	0	0	17.64707314	0	0	0	34.68562652	0	0	0	0	0	0
F2S4_170421_008_B01	ALM	L5-L6	GABAergic	Lamp5	7	Lamp5 Lhx6	Core	0	0	151.8415108	0	0	0	44.84770361	0	0	0	0	0	0	0	82.00722945	0	0	0	0	0	0	0	0	0	0	0	0	0	0
F2S4_170421_008_C01	ALM	L5-L6	GABAergic	Lamp5	7	Lamp5 Lhx6	Core	0	0	10.94929767	0	0	0	0	0	0	0	0	0	0	0	83.085847	68.91616767	0	0	45.72941967	0	0	0	59.899099	0	0	0	0	0	0
F1S4_180108_301_B01	VISp	L1-L4	GABAergic	Lamp5	7	Lamp5 Lhx6	Core	0	0	0	0	0	0	0	0	0	0	0	0	0	0	1.304104015	0	0	0	0	0	0	0	65.20520077	0	0	0	0	0	0
F1S4_180108_301_C01	VISp	L1-L4	GABAergic	Lamp5	7	Lamp5 Lhx6	Core	0	0	0	0	0	0	44.83725396	0	0	0	0	0	0	0	15.82491316	32.96856908	0	0	0	0	0	0	25.0561125	0	0	0	0	0	0
F1S4_180108_301_H01	VISp	L1-L4	GABAergic	Lamp5	7	Lamp5 Lhx6	Core	0	0	0	0	0	0	66.52622242	0	0	0	0	0	0	0	2.334253418	0	0	0	0	0	0	0	0	0	0	0	0	0	0
F1S4_180108_303_D01	VISp	L1-L4	GABAergic	Lamp5	7	Lamp5 Lhx6	Core	0	0	0	0	58.29057587	0	51.66664679	0	0	0	0	0	0	0	79.48714892	0	0	0	0	0	0	0	30.47007375	0	0	0	49.01707516	0	0
F1S4_180108_304_H01	VISp	L1-L4	GABAergic	Lamp5	7	Lamp5 Lhx6	Core	0	0	0	0	0	0	0	0	0	0	0	0	0	0	7.677147435	30.70858974	0	0	0	0	0	0	40.57920787	0	0	0	0	0	0
F1S4_180124_309_G01	VISp	L5-L6	GABAergic	Lamp5	7	Lamp5 Lhx6	Core	0	0	6.263920445	0	30.42475645	0	0	0	0	0	0	0	0	0	119.9093342	0	0	0	0	8.948457778	0	0	0.894845778	0	0	0	0	0	0
F1S4_180130_335_D01	VISp	L5-L6	GABAergic	Lamp5	7	Lamp5 Lhx6	Core	0	0	0	0	0	0	0	0	0	0	0	0	0	9.512412747	64.68440668	30.43972079	0	0	0	0	0	0	60.87944158	0	0	0	0	0	0
F2S4_151223_013_B01	VISp	L6	GABAergic	Lamp5	7	Lamp5 Lhx6	Core	0	0	0	0	0	0	128.4599918	0	0	0	0	0	0	0	123.4919258	77.35988457	0	0	0	0	0	0	2.129171135	0	0	0	0	0	0
F2S4_151223_014_B01	VISp	L6	GABAergic	Lamp5	7	Lamp5 Lhx6	Core	0	0	0	0	0	0	88.63737609	0	0	0	0	0	0	0	332.3901603	0	0	0	0	0	0	0	146.7101397	0	0	0	0	0	0
F2S4_160114_003_G01	VISp	L5	GABAergic	Lamp5	7	Lamp5 Lhx6	Core	0	0	0	0	0	0	50.27076392	0	0	0	0	0	0	0	26.53179207	0	0	0	0	0	0	0	90.76665708	0	0	0	0	0	0
[truncated: 21,823 more rows]
