# Supplementary material for: Single-cell transcriptomic evidence for dense intracortical neuropeptide networks
Source: eLife. 2019 Nov 11;8:e47889. doi: 10.7554/eLife.47889 (PMC6881117; doi:10.7554/eLife.47889)
Supplement: Supplementary file 1. [file elife-47889-supp1.csv]

Category	ID	Name	Source	p-value	q-value Bonferroni	q-value FDR B&H	q-value FDR B&Y	Hit Count in Query List	Hit Count in Genome	Hit in Query List
GO: Molecular Function	GO:0005179	hormone activity		7.06E-31	6.99E-29	6.99E-29	3.62E-28	15	127	TRH,VIP,GRP,CORT,CRH,PTHLH,NPY,ADCYAP1,CCK,PDYN,PNOC,NTS,PENK,NMB,RLN1
GO: Molecular Function	GO:0005184	neuropeptide hormone activity		8.31E-28	8.22E-26	4.11E-26	2.13E-25	11	31	VIP,GRP,CORT,CRH,NPY,ADCYAP1,CCK,PDYN,PNOC,NTS,PENK
GO: Molecular Function	GO:0048018	receptor ligand activity		1.15E-21	1.14E-19	3.30E-20	1.71E-19	15	502	TRH,VIP,GRP,CORT,CRH,PTHLH,NPY,ADCYAP1,CCK,PDYN,PNOC,NTS,PENK,NMB,RLN1
GO: Molecular Function	GO:0030546	signaling receptor activator activity		1.33E-21	1.32E-19	3.30E-20	1.71E-19	15	507	TRH,VIP,GRP,CORT,CRH,PTHLH,NPY,ADCYAP1,CCK,PDYN,PNOC,NTS,PENK,NMB,RLN1
GO: Molecular Function	GO:0030545	receptor regulator activity		4.82E-21	4.78E-19	9.55E-20	4.95E-19	15	552	TRH,VIP,GRP,CORT,CRH,PTHLH,NPY,ADCYAP1,CCK,PDYN,PNOC,NTS,PENK,NMB,RLN1
GO: Molecular Function	GO:0005102	signaling receptor binding		6.42E-17	6.35E-15	1.06E-15	5.48E-15	17	1822	TRH,VIP,GRP,CORT,TAC1,CRH,PTHLH,TAC3,NPY,ADCYAP1,CCK,PDYN,PNOC,NTS,PENK,NMB,RLN1
GO: Molecular Function	GO:0098772	molecular function regulator		1.18E-14	1.17E-12	1.67E-13	8.65E-13	16	1917	TRH,VIP,GRP,CORT,CRH,PTHLH,SET,NPY,ADCYAP1,CCK,PDYN,PNOC,NTS,PENK,NMB,RLN1
GO: Molecular Function	GO:0001664	G protein-coupled receptor binding		2.48E-12	2.46E-10	3.07E-11	1.59E-10	9	305	CORT,TAC1,CRH,NPY,ADCYAP1,PDYN,PNOC,PENK,NMB
GO: Molecular Function	GO:0051428	peptide hormone receptor binding		8.00E-12	7.92E-10	8.80E-11	4.56E-10	5	21	VIP,CRH,PTHLH,ADCYAP1,CCK
GO: Molecular Function	GO:0071855	neuropeptide receptor binding		7.87E-11	7.79E-09	7.79E-10	4.03E-09	5	32	TAC1,CRH,NPY,ADCYAP1,NMB
GO: Molecular Function	GO:0001515	opioid peptide activity		6.94E-09	6.87E-07	6.24E-08	3.23E-07	3	5	PDYN,PNOC,PENK
GO: Molecular Function	GO:0031628	opioid receptor binding		8.30E-08	8.22E-06	6.85E-07	3.54E-06	3	10	PDYN,PNOC,PENK
GO: Molecular Function	GO:0051427	hormone receptor binding		1.07E-06	1.06E-04	8.13E-06	4.21E-05	5	207	VIP,CRH,PTHLH,ADCYAP1,CCK
GO: Molecular Function	GO:0004016	adenylate cyclase activity		2.92E-06	2.89E-04	2.06E-05	1.07E-04	5	254	VIP,CORT,PTHLH,ADCYAP1,RLN1
GO: Molecular Function	GO:0016849	phosphorus-oxygen lyase activity		4.86E-06	4.81E-04	3.01E-05	1.56E-04	5	282	VIP,CORT,PTHLH,ADCYAP1,RLN1
GO: Molecular Function	GO:0009975	cyclase activity		4.86E-06	4.81E-04	3.01E-05	1.56E-04	5	282	VIP,CORT,PTHLH,ADCYAP1,RLN1
GO: Molecular Function	GO:0016829	lyase activity		1.55E-04	1.53E-02	9.02E-04	4.67E-03	5	581	VIP,CORT,PTHLH,ADCYAP1,RLN1
GO: Molecular Function	GO:0031841	neuropeptide Y receptor binding		9.40E-04	9.30E-02	4.23E-03	2.19E-02	1	1	NPY
GO: Molecular Function	GO:0031858	pituitary adenylate cyclase-activating polypeptide receptor binding		9.40E-04	9.30E-02	4.23E-03	2.19E-02	1	1	ADCYAP1
GO: Molecular Function	GO:0008437	thyrotropin-releasing hormone activity		9.40E-04	9.30E-02	4.23E-03	2.19E-02	1	1	TRH
GO: Molecular Function	GO:0031710	neuromedin B receptor binding		9.40E-04	9.30E-02	4.23E-03	2.19E-02	1	1	NMB
GO: Molecular Function	GO:0016521	pituitary adenylate cyclase activating polypeptide activity		9.40E-04	9.30E-02	4.23E-03	2.19E-02	1	1	ADCYAP1
GO: Molecular Function	GO:0031835	substance P receptor binding		1.88E-03	1.86E-01	7.43E-03	3.85E-02	1	2	TAC1
GO: Molecular Function	GO:0031834	neurokinin receptor binding		1.88E-03	1.86E-01	7.43E-03	3.85E-02	1	2	TAC1
GO: Molecular Function	GO:0017045	corticotropin-releasing hormone activity		1.88E-03	1.86E-01	7.43E-03	3.85E-02	1	2	CRH
GO: Molecular Function	GO:0051430	corticotropin-releasing hormone receptor 1 binding		3.75E-03	3.71E-01	1.33E-02	6.86E-02	1	4	CRH
GO: Molecular Function	GO:0051431	corticotropin-releasing hormone receptor 2 binding		3.75E-03	3.71E-01	1.33E-02	6.86E-02	1	4	CRH
GO: Molecular Function	GO:0031705	bombesin receptor binding		3.75E-03	3.71E-01	1.33E-02	6.86E-02	1	4	NMB
GO: Molecular Function	GO:0051429	corticotropin-releasing hormone receptor binding		5.62E-03	5.56E-01	1.92E-02	9.93E-02	1	6	CRH
GO: Molecular Function	GO:0004629	phospholipase C activity		9.81E-03	9.71E-01	3.24E-02	1.68E-01	2	161	VIP,GRP
GO: Biological Process	GO:0007186	G protein-coupled receptor signaling pathway		3.16E-19	3.27E-16	3.27E-16	2.46E-15	17	1395	TRH,VIP,GRP,CORT,TAC1,CRH,PTHLH,TAC3,NPY,ADCYAP1,CCK,PDYN,PNOC,NTS,PENK,NMB,RLN1
GO: Biological Process	GO:0007218	neuropeptide signaling pathway		1.08E-18	1.11E-15	5.57E-16	4.19E-15	10	115	GRP,CORT,TAC1,TAC3,NPY,ADCYAP1,PDYN,PNOC,PENK,NMB
GO: Biological Process	GO:0007610	behavior		4.29E-12	4.45E-09	1.48E-09	1.12E-08	11	745	TRH,VIP,GRP,CORT,TAC1,CRH,NPY,ADCYAP1,CCK,NTS,PENK
GO: Biological Process	GO:0007267	cell-cell signaling		2.59E-10	2.69E-07	6.72E-08	5.05E-07	13	1902	TRH,VIP,GRP,CORT,TAC1,CRH,PTHLH,NPY,ADCYAP1,PDYN,PNOC,PENK,NMB
GO: Biological Process	GO:0044706	multi-multicellular organism process		2.12E-09	2.20E-06	4.39E-07	3.30E-06	7	271	TAC1,CRH,PTHLH,TAC3,ADCYAP1,PNOC,RLN1
GO: Biological Process	GO:0046887	positive regulation of hormone secretion		4.82E-09	4.99E-06	7.40E-07	5.57E-06	6	165	TRH,GRP,TAC1,CRH,ADCYAP1,NMB
GO: Biological Process	GO:1903532	positive regulation of secretion by cell		5.00E-09	5.18E-06	7.40E-07	5.57E-06	8	501	TRH,VIP,GRP,TAC1,CRH,ADCYAP1,CCK,NMB
GO: Biological Process	GO:0051047	positive regulation of secretion		8.48E-09	8.79E-06	1.10E-06	8.26E-06	8	536	TRH,VIP,GRP,TAC1,CRH,ADCYAP1,CCK,NMB
GO: Biological Process	GO:0019935	cyclic-nucleotide-mediated signaling		1.04E-08	1.08E-05	1.20E-06	9.01E-06	7	341	VIP,CORT,CRH,PTHLH,NPY,ADCYAP1,RLN1
GO: Biological Process	GO:0050795	regulation of behavior		1.94E-08	2.01E-05	1.95E-06	1.47E-05	5	97	TRH,CORT,CRH,CCK,PENK
GO: Biological Process	GO:0046879	hormone secretion		2.15E-08	2.23E-05	1.95E-06	1.47E-05	7	379	TRH,VIP,GRP,TAC1,CRH,ADCYAP1,NMB
GO: Biological Process	GO:0033555	multicellular organismal response to stress		2.26E-08	2.34E-05	1.95E-06	1.47E-05	5	100	TAC1,CRH,ADCYAP1,CCK,PENK
GO: Biological Process	GO:0009914	hormone transport		2.53E-08	2.62E-05	2.02E-06	1.52E-05	7	388	TRH,VIP,GRP,TAC1,CRH,ADCYAP1,NMB
GO: Biological Process	GO:0007565	female pregnancy		3.08E-08	3.19E-05	2.06E-06	1.55E-05	6	225	CRH,PTHLH,TAC3,ADCYAP1,PNOC,RLN1
GO: Biological Process	GO:0019932	second-messenger-mediated signaling		3.29E-08	3.41E-05	2.06E-06	1.55E-05	8	638	VIP,GRP,CORT,CRH,PTHLH,NPY,ADCYAP1,RLN1
GO: Biological Process	GO:2000987	positive regulation of behavioral fear response		3.38E-08	3.50E-05	2.06E-06	1.55E-05	3	8	CRH,CCK,PENK
GO: Biological Process	GO:1903367	positive regulation of fear response		3.38E-08	3.50E-05	2.06E-06	1.55E-05	3	8	CRH,CCK,PENK
GO: Biological Process	GO:0043949	regulation of cAMP-mediated signaling		7.77E-08	8.05E-05	4.47E-06	3.36E-05	6	263	VIP,CORT,CRH,PTHLH,ADCYAP1,RLN1
GO: Biological Process	GO:0007187	G protein-coupled receptor signaling pathway, coupled to cyclic nucleotide second messenger		8.50E-08	8.80E-05	4.63E-06	3.49E-05	6	267	VIP,CORT,PTHLH,NPY,ADCYAP1,RLN1
GO: Biological Process	GO:1903365	regulation of fear response		9.94E-08	1.03E-04	4.91E-06	3.69E-05	3	11	CRH,CCK,PENK
GO: Biological Process	GO:2000822	regulation of behavioral fear response		9.94E-08	1.03E-04	4.91E-06	3.69E-05	3	11	CRH,CCK,PENK
GO: Biological Process	GO:0001662	behavioral fear response		1.10E-07	1.14E-04	4.97E-06	3.73E-05	4	51	CRH,ADCYAP1,CCK,PENK
GO: Biological Process	GO:0019933	cAMP-mediated signaling		1.10E-07	1.14E-04	4.97E-06	3.73E-05	6	279	VIP,CORT,CRH,PTHLH,ADCYAP1,RLN1
GO: Biological Process	GO:0002209	behavioral defense response		1.19E-07	1.24E-04	5.15E-06	3.87E-05	4	52	CRH,ADCYAP1,CCK,PENK
GO: Biological Process	GO:0042596	fear response		1.50E-07	1.55E-04	6.21E-06	4.67E-05	4	55	CRH,ADCYAP1,CCK,PENK
GO: Biological Process	GO:0019233	sensory perception of pain		1.73E-07	1.79E-04	6.88E-06	5.17E-05	5	150	VIP,TAC1,ADCYAP1,CCK,PENK
GO: Biological Process	GO:0046883	regulation of hormone secretion		2.57E-07	2.66E-04	9.85E-06	7.41E-05	6	322	TRH,GRP,TAC1,CRH,ADCYAP1,NMB
GO: Biological Process	GO:0023061	signal release		3.16E-07	3.28E-04	1.17E-05	8.80E-05	7	562	TRH,VIP,GRP,TAC1,CRH,ADCYAP1,NMB
GO: Biological Process	GO:0007268	chemical synaptic transmission		4.22E-07	4.38E-04	1.46E-05	1.10E-04	8	889	CORT,TAC1,CRH,NPY,ADCYAP1,PDYN,PNOC,PENK
GO: Biological Process	GO:0098916	anterograde trans-synaptic signaling		4.22E-07	4.38E-04	1.46E-05	1.10E-04	8	889	CORT,TAC1,CRH,NPY,ADCYAP1,PDYN,PNOC,PENK
GO: Biological Process	GO:0099537	trans-synaptic signaling		4.60E-07	4.76E-04	1.53E-05	1.15E-04	8	899	CORT,TAC1,CRH,NPY,ADCYAP1,PDYN,PNOC,PENK
GO: Biological Process	GO:1903530	regulation of secretion by cell		4.72E-07	4.89E-04	1.53E-05	1.15E-04	8	902	TRH,VIP,GRP,TAC1,CRH,ADCYAP1,CCK,NMB
GO: Biological Process	GO:0099536	synaptic signaling		5.13E-07	5.31E-04	1.61E-05	1.21E-04	8	912	CORT,TAC1,CRH,NPY,ADCYAP1,PDYN,PNOC,PENK
GO: Biological Process	GO:0010817	regulation of hormone levels		5.74E-07	5.95E-04	1.74E-05	1.31E-04	7	614	TRH,VIP,GRP,TAC1,CRH,ADCYAP1,NMB
GO: Biological Process	GO:0008015	blood circulation		5.87E-07	6.08E-04	1.74E-05	1.31E-04	7	616	VIP,TAC1,CRH,TAC3,NPY,ADCYAP1,NTS
GO: Biological Process	GO:0003013	circulatory system process		6.47E-07	6.71E-04	1.86E-05	1.40E-04	7	625	VIP,TAC1,CRH,TAC3,NPY,ADCYAP1,NTS
GO: Biological Process	GO:2000854	positive regulation of corticosterone secretion		7.60E-07	7.87E-04	2.13E-05	1.60E-04	2	2	TAC1,CRH
GO: Biological Process	GO:0051046	regulation of secretion		8.00E-07	8.29E-04	2.18E-05	1.64E-04	8	967	TRH,VIP,GRP,TAC1,CRH,ADCYAP1,CCK,NMB
GO: Biological Process	GO:0007188	adenylate cyclase-modulating G protein-coupled receptor signaling pathway		1.53E-06	1.58E-03	4.06E-05	3.05E-04	5	233	VIP,CORT,PTHLH,ADCYAP1,RLN1
GO: Biological Process	GO:0048521	negative regulation of behavior		1.75E-06	1.81E-03	4.53E-05	3.40E-04	3	27	TRH,CRH,CCK
GO: Biological Process	GO:0008306	associative learning		2.04E-06	2.12E-03	5.17E-05	3.88E-04	4	105	TAC1,CRH,CCK,NTS
GO: Biological Process	GO:0045761	regulation of adenylate cyclase activity		2.20E-06	2.28E-03	5.43E-05	4.09E-04	5	251	VIP,CORT,PTHLH,ADCYAP1,RLN1
GO: Biological Process	GO:0060618	nipple development		2.28E-06	2.36E-03	5.49E-05	4.13E-04	2	3	PTHLH,RLN1
GO: Biological Process	GO:0031279	regulation of cyclase activity		2.98E-06	3.09E-03	7.02E-05	5.28E-04	5	267	VIP,CORT,PTHLH,ADCYAP1,RLN1
GO: Biological Process	GO:0044703	multi-organism reproductive process		3.18E-06	3.29E-03	7.22E-05	5.43E-04	8	1161	VIP,TAC1,CRH,PTHLH,TAC3,ADCYAP1,PNOC,RLN1
GO: Biological Process	GO:0051339	regulation of lyase activity		3.21E-06	3.32E-03	7.22E-05	5.43E-04	5	271	VIP,CORT,PTHLH,ADCYAP1,RLN1
GO: Biological Process	GO:0051050	positive regulation of transport		3.39E-06	3.51E-03	7.46E-05	5.61E-04	8	1171	TRH,VIP,GRP,TAC1,CRH,ADCYAP1,CCK,NMB
GO: Biological Process	GO:0090277	positive regulation of peptide hormone secretion		3.84E-06	3.98E-03	8.29E-05	6.24E-04	4	123	TRH,GRP,CRH,ADCYAP1
GO: Biological Process	GO:0051952	regulation of amine transport		3.97E-06	4.11E-03	8.39E-05	6.31E-04	4	124	TRH,VIP,CRH,CCK
GO: Biological Process	GO:2000852	regulation of corticosterone secretion		4.55E-06	4.72E-03	9.43E-05	7.09E-04	2	4	TAC1,CRH
GO: Biological Process	GO:0015837	amine transport		5.09E-06	5.27E-03	1.03E-04	7.78E-04	4	132	TRH,VIP,CRH,CCK
GO: Biological Process	GO:0030072	peptide hormone secretion		5.44E-06	5.64E-03	1.08E-04	8.15E-04	5	302	TRH,VIP,GRP,CRH,ADCYAP1
GO: Biological Process	GO:0048520	positive regulation of behavior		5.86E-06	6.07E-03	1.15E-04	8.61E-04	3	40	CRH,CCK,PENK
GO: Biological Process	GO:0045471	response to ethanol		6.80E-06	7.04E-03	1.30E-04	9.81E-04	4	142	TRH,CRH,ADCYAP1,PENK
GO: Biological Process	GO:0007611	learning or memory		6.99E-06	7.24E-03	1.32E-04	9.91E-04	5	318	VIP,TAC1,CRH,CCK,NTS
GO: Biological Process	GO:0035934	corticosterone secretion		7.58E-06	7.86E-03	1.40E-04	1.06E-03	2	5	TAC1,CRH
GO: Biological Process	GO:2000851	positive regulation of glucocorticoid secretion		1.14E-05	1.18E-02	2.07E-04	1.55E-03	2	6	TAC1,CRH
GO: Biological Process	GO:0050890	cognition		1.24E-05	1.29E-02	2.22E-04	1.67E-03	5	358	VIP,TAC1,CRH,CCK,NTS
GO: Biological Process	GO:0051954	positive regulation of amine transport		1.38E-05	1.43E-02	2.42E-04	1.82E-03	3	53	TRH,VIP,CCK
GO: Biological Process	GO:0007612	learning		1.77E-05	1.84E-02	3.06E-04	2.30E-03	4	181	TAC1,CRH,CCK,NTS
GO: Biological Process	GO:0007217	tachykinin receptor signaling pathway		2.12E-05	2.20E-02	3.60E-04	2.71E-03	2	8	TAC1,TAC3
GO: Biological Process	GO:0008284	positive regulation of cell population proliferation		2.68E-05	2.78E-02	4.48E-04	3.37E-03	7	1098	VIP,TAC1,CRH,PTHLH,ADCYAP1,CCK,NMB
GO: Biological Process	GO:2000848	positive regulation of corticosteroid hormone secretion		2.72E-05	2.82E-02	4.48E-04	3.37E-03	2	9	TAC1,CRH
GO: Biological Process	GO:0008217	regulation of blood pressure		3.23E-05	3.35E-02	5.24E-04	3.94E-03	4	211	TAC1,CRH,TAC3,NPY
GO: Biological Process	GO:0050877	nervous system process		3.71E-05	3.84E-02	5.91E-04	4.44E-03	8	1620	VIP,TAC1,CRH,ADCYAP1,CCK,PNOC,NTS,PENK
GO: Biological Process	GO:2000849	regulation of glucocorticoid secretion		4.16E-05	4.31E-02	6.53E-04	4.91E-03	2	11	TAC1,CRH
GO: Biological Process	GO:0022414	reproductive process		4.46E-05	4.62E-02	6.88E-04	5.18E-03	8	1662	VIP,TAC1,CRH,PTHLH,TAC3,ADCYAP1,PNOC,RLN1
GO: Biological Process	GO:0000003	reproduction		4.52E-05	4.68E-02	6.88E-04	5.18E-03	8	1665	VIP,TAC1,CRH,PTHLH,TAC3,ADCYAP1,PNOC,RLN1
GO: Biological Process	GO:0032940	secretion by cell		4.97E-05	5.15E-02	7.17E-04	5.40E-03	8	1687	TRH,VIP,GRP,TAC1,CRH,ADCYAP1,CCK,NMB
GO: Biological Process	GO:0014060	regulation of epinephrine secretion		4.99E-05	5.17E-02	7.17E-04	5.40E-03	2	12	VIP,CRH
GO: Biological Process	GO:2000833	positive regulation of steroid hormone secretion		4.99E-05	5.17E-02	7.17E-04	5.40E-03	2	12	TAC1,CRH
GO: Biological Process	GO:0035933	glucocorticoid secretion		4.99E-05	5.17E-02	7.17E-04	5.40E-03	2	12	TAC1,CRH
GO: Biological Process	GO:0048242	epinephrine secretion		5.89E-05	6.10E-02	8.36E-04	6.29E-03	2	13	VIP,CRH
GO: Biological Process	GO:0140352	export from cell		6.11E-05	6.33E-02	8.55E-04	6.43E-03	8	1736	TRH,VIP,GRP,TAC1,CRH,ADCYAP1,CCK,NMB
GO: Biological Process	GO:0090276	regulation of peptide hormone secretion		6.46E-05	6.69E-02	8.92E-04	6.71E-03	4	252	TRH,GRP,CRH,ADCYAP1
GO: Biological Process	GO:0048241	epinephrine transport		6.87E-05	7.11E-02	9.36E-04	7.04E-03	2	14	VIP,CRH
GO: Biological Process	GO:0072347	response to anesthetic		7.23E-05	7.49E-02	9.69E-04	7.29E-03	3	92	TAC1,CRH,PENK
GO: Biological Process	GO:0097305	response to alcohol		7.29E-05	7.56E-02	9.69E-04	7.29E-03	4	260	TRH,CRH,ADCYAP1,PENK
GO: Biological Process	GO:0035641	locomotory exploration behavior		7.92E-05	8.20E-02	1.03E-03	7.71E-03	2	15	CRH,PENK
GO: Biological Process	GO:2000252	negative regulation of feeding behavior		7.92E-05	8.20E-02	1.03E-03	7.71E-03	2	15	TRH,CCK
GO: Biological Process	GO:0046903	secretion		9.23E-05	9.56E-02	1.18E-03	8.88E-03	8	1839	TRH,VIP,GRP,TAC1,CRH,ADCYAP1,CCK,NMB
GO: Biological Process	GO:0050801	ion homeostasis		1.04E-04	1.08E-01	1.31E-03	9.88E-03	6	918	TAC1,CRH,PTHLH,ADCYAP1,CCK,NMB
GO: Biological Process	GO:0060456	positive regulation of digestive system process		1.15E-04	1.19E-01	1.42E-03	1.07E-02	2	18	TAC1,CRH
GO: Biological Process	GO:2000846	regulation of corticosteroid hormone secretion		1.15E-04	1.19E-01	1.42E-03	1.07E-02	2	18	TAC1,CRH
GO: Biological Process	GO:0035930	corticosteroid hormone secretion		1.29E-04	1.33E-01	1.56E-03	1.18E-02	2	19	TAC1,CRH
GO: Biological Process	GO:0042127	regulation of cell population proliferation		1.30E-04	1.34E-01	1.56E-03	1.18E-02	8	1929	VIP,TAC1,CRH,PTHLH,ADCYAP1,CCK,NMB,RLN1
GO: Biological Process	GO:0032095	regulation of response to food		1.43E-04	1.48E-01	1.70E-03	1.28E-02	2	20	NPY,CCK
GO: Biological Process	GO:2000831	regulation of steroid hormone secretion		1.74E-04	1.80E-01	2.02E-03	1.52E-02	2	22	TAC1,CRH
GO: Biological Process	GO:0051412	response to corticosterone		1.74E-04	1.80E-01	2.02E-03	1.52E-02	2	22	TRH,CRH
GO: Biological Process	GO:0051051	negative regulation of transport		1.87E-04	1.94E-01	2.15E-03	1.62E-02	5	633	TRH,VIP,CRH,ADCYAP1,NMB
GO: Biological Process	GO:0032098	regulation of appetite		1.90E-04	1.97E-01	2.16E-03	1.63E-02	2	23	NPY,CCK
GO: Biological Process	GO:0043279	response to alkaloid		2.06E-04	2.14E-01	2.32E-03	1.75E-02	3	131	TAC1,CRH,PENK
GO: Biological Process	GO:0007631	feeding behavior		2.11E-04	2.19E-01	2.35E-03	1.77E-02	3	132	TRH,NPY,CCK
GO: Biological Process	GO:0014048	regulation of glutamate secretion		2.25E-04	2.33E-01	2.45E-03	1.85E-02	2	25	TRH,CCK
GO: Biological Process	GO:0035929	steroid hormone secretion		2.25E-04	2.33E-01	2.45E-03	1.85E-02	2	25	TAC1,CRH
GO: Biological Process	GO:0007600	sensory perception		2.32E-04	2.40E-01	2.50E-03	1.88E-02	6	1062	VIP,TAC1,ADCYAP1,CCK,PNOC,PENK
GO: Biological Process	GO:0002793	positive regulation of peptide secretion		2.34E-04	2.43E-01	2.50E-03	1.88E-02	4	352	TRH,GRP,CRH,ADCYAP1
GO: Biological Process	GO:0032107	regulation of response to nutrient levels		2.44E-04	2.53E-01	2.55E-03	1.92E-02	2	26	NPY,CCK
GO: Biological Process	GO:0032104	regulation of response to extracellular stimulus		2.44E-04	2.53E-01	2.55E-03	1.92E-02	2	26	NPY,CCK
GO: Biological Process	GO:0051957	positive regulation of amino acid transport		2.83E-04	2.93E-01	2.93E-03	2.21E-02	2	28	TRH,CCK
GO: Biological Process	GO:0007189	adenylate cyclase-activating G protein-coupled receptor signaling pathway		2.95E-04	3.06E-01	3.03E-03	2.28E-02	3	148	VIP,PTHLH,ADCYAP1
GO: Biological Process	GO:0007620	copulation		3.04E-04	3.15E-01	3.03E-03	2.28E-02	2	29	VIP,TAC1
GO: Biological Process	GO:0045187	regulation of circadian sleep/wake cycle, sleep		3.04E-04	3.15E-01	3.03E-03	2.28E-02	2	29	CORT,CRH
GO: Biological Process	GO:0046677	response to antibiotic		3.07E-04	3.18E-01	3.03E-03	2.28E-02	4	378	TRH,CRH,ADCYAP1,PENK
GO: Biological Process	GO:0046717	acid secretion		3.07E-04	3.18E-01	3.03E-03	2.28E-02	3	150	TRH,CCK,NMB
GO: Biological Process	GO:0007586	digestion		3.65E-04	3.78E-01	3.50E-03	2.63E-02	3	159	TAC1,CRH,CCK
GO: Biological Process	GO:0140353	lipid export from cell		3.71E-04	3.84E-01	3.50E-03	2.63E-02	2	32	TAC1,CRH
GO: Biological Process	GO:0050802	circadian sleep/wake cycle, sleep		3.71E-04	3.84E-01	3.50E-03	2.63E-02	2	32	CORT,CRH
GO: Biological Process	GO:0035640	exploration behavior		3.71E-04	3.84E-01	3.50E-03	2.63E-02	2	32	CRH,PENK
GO: Biological Process	GO:0007190	activation of adenylate cyclase activity		3.71E-04	3.85E-01	3.50E-03	2.63E-02	3	160	VIP,PTHLH,ADCYAP1
GO: Biological Process	GO:0002790	peptide secretion		3.76E-04	3.90E-01	3.50E-03	2.63E-02	5	736	TRH,VIP,GRP,CRH,ADCYAP1
GO: Biological Process	GO:0051384	response to glucocorticoid		3.78E-04	3.92E-01	3.50E-03	2.63E-02	3	161	TRH,CRH,ADCYAP1
GO: Biological Process	GO:0042749	regulation of circadian sleep/wake cycle		3.94E-04	4.09E-01	3.58E-03	2.70E-02	2	33	CORT,CRH
GO: Biological Process	GO:0051385	response to mineralocorticoid		3.94E-04	4.09E-01	3.58E-03	2.70E-02	2	33	TRH,CRH
GO: Biological Process	GO:0022410	circadian sleep/wake cycle process		4.44E-04	4.60E-01	4.00E-03	3.01E-02	2	35	CORT,CRH
GO: Biological Process	GO:0043278	response to morphine		4.70E-04	4.87E-01	4.20E-03	3.16E-02	2	36	TAC1,PENK
GO: Biological Process	GO:0014072	response to isoquinoline alkaloid		4.96E-04	5.14E-01	4.32E-03	3.25E-02	2	37	TAC1,PENK
GO: Biological Process	GO:0051953	negative regulation of amine transport		4.96E-04	5.14E-01	4.32E-03	3.25E-02	2	37	TRH,CRH
GO: Biological Process	GO:0043950	positive regulation of cAMP-mediated signaling		4.96E-04	5.14E-01	4.32E-03	3.25E-02	2	37	CRH,ADCYAP1
GO: Biological Process	GO:0031960	response to corticosteroid		5.07E-04	5.25E-01	4.38E-03	3.29E-02	3	178	TRH,CRH,ADCYAP1
GO: Biological Process	GO:0060259	regulation of feeding behavior		5.52E-04	5.72E-01	4.69E-03	3.52E-02	2	39	TRH,CCK
GO: Biological Process	GO:0042745	circadian sleep/wake cycle		5.52E-04	5.72E-01	4.69E-03	3.52E-02	2	39	CORT,CRH
GO: Biological Process	GO:0097746	regulation of blood vessel diameter		5.68E-04	5.88E-01	4.74E-03	3.57E-02	3	185	VIP,ADCYAP1,NTS
GO: Biological Process	GO:0035296	regulation of tube diameter		5.68E-04	5.88E-01	4.74E-03	3.57E-02	3	185	VIP,ADCYAP1,NTS
GO: Biological Process	GO:0035150	regulation of tube size		5.77E-04	5.97E-01	4.78E-03	3.59E-02	3	186	VIP,ADCYAP1,NTS
GO: Biological Process	GO:0043269	regulation of ion transport		6.00E-04	6.22E-01	4.94E-03	3.71E-02	5	815	TRH,VIP,CRH,ADCYAP1,CCK
GO: Biological Process	GO:0048265	response to pain		6.10E-04	6.32E-01	4.98E-03	3.74E-02	2	41	TAC1,CRH
GO: Biological Process	GO:0043271	negative regulation of ion transport		6.52E-04	6.75E-01	5.27E-03	3.97E-02	3	194	TRH,VIP,ADCYAP1
GO: Biological Process	GO:0032094	response to food		6.71E-04	6.95E-01	5.39E-03	4.05E-02	2	43	NPY,CCK
GO: Biological Process	GO:0030431	sleep		7.35E-04	7.61E-01	5.86E-03	4.40E-02	2	45	CORT,CRH
GO: Biological Process	GO:0060359	response to ammonium ion		7.87E-04	8.15E-01	6.22E-03	4.68E-02	3	207	TAC1,CRH,PENK
GO: Biological Process	GO:0048878	chemical homeostasis		8.24E-04	8.54E-01	6.42E-03	4.83E-02	6	1345	TAC1,CRH,PTHLH,ADCYAP1,CCK,NMB
GO: Biological Process	GO:0031347	regulation of defense response		8.25E-04	8.55E-01	6.42E-03	4.83E-02	5	874	TAC1,CRH,ADCYAP1,CCK,PENK
GO: Biological Process	GO:0042755	eating behavior		8.36E-04	8.66E-01	6.42E-03	4.83E-02	2	48	TRH,CCK
GO: Biological Process	GO:0051955	regulation of amino acid transport		8.36E-04	8.66E-01	6.42E-03	4.83E-02	2	48	TRH,CCK
GO: Biological Process	GO:0043267	negative regulation of potassium ion transport		8.71E-04	9.02E-01	6.59E-03	4.96E-02	2	49	VIP,ADCYAP1
GO: Biological Process	GO:0002878	negative regulation of acute inflammatory response to non-antigenic stimulus		8.97E-04	9.30E-01	6.59E-03	4.96E-02	1	1	ADCYAP1
GO: Biological Process	GO:1903366	negative regulation of fear response		8.97E-04	9.30E-01	6.59E-03	4.96E-02	1	1	CCK
GO: Biological Process	GO:0060649	mammary gland bud elongation		8.97E-04	9.30E-01	6.59E-03	4.96E-02	1	1	PTHLH
GO: Biological Process	GO:0060659	nipple sheath formation		8.97E-04	9.30E-01	6.59E-03	4.96E-02	1	1	PTHLH
GO: Biological Process	GO:2000986	negative regulation of behavioral fear response		8.97E-04	9.30E-01	6.59E-03	4.96E-02	1	1	CCK
GO: Biological Process	GO:0032892	positive regulation of organic acid transport		9.07E-04	9.40E-01	6.62E-03	4.98E-02	2	50	TRH,CCK
GO: Biological Process	GO:0003018	vascular process in circulatory system		9.38E-04	9.72E-01	6.75E-03	5.08E-02	3	220	VIP,ADCYAP1,NTS
GO: Biological Process	GO:0050806	positive regulation of synaptic transmission		9.38E-04	9.72E-01	6.75E-03	5.08E-02	3	220	TAC1,CRH,ADCYAP1
GO: Biological Process	GO:0044058	regulation of digestive system process		1.02E-03	1.00E+00	7.28E-03	5.47E-02	2	53	TAC1,CRH
GO: Biological Process	GO:0048732	gland development		1.04E-03	1.00E+00	7.34E-03	5.52E-02	4	522	CRH,PTHLH,ADCYAP1,RLN1
GO: Biological Process	GO:0044060	regulation of endocrine process		1.06E-03	1.00E+00	7.45E-03	5.60E-02	2	54	TAC1,CRH
GO: Biological Process	GO:0002673	regulation of acute inflammatory response		1.14E-03	1.00E+00	7.80E-03	5.86E-02	2	56	TAC1,ADCYAP1
GO: Biological Process	GO:0007618	mating		1.14E-03	1.00E+00	7.80E-03	5.86E-02	2	56	VIP,TAC1
GO: Biological Process	GO:0051930	regulation of sensory perception of pain		1.14E-03	1.00E+00	7.80E-03	5.86E-02	2	56	VIP,CCK
GO: Biological Process	GO:0014047	glutamate secretion		1.14E-03	1.00E+00	7.80E-03	5.86E-02	2	56	TRH,CCK
GO: Biological Process	GO:0051931	regulation of sensory perception		1.18E-03	1.00E+00	8.02E-03	6.03E-02	2	57	VIP,CCK
GO: Biological Process	GO:0031667	response to nutrient levels		1.20E-03	1.00E+00	8.11E-03	6.10E-02	4	543	NPY,ADCYAP1,CCK,PENK
GO: Biological Process	GO:0055074	calcium ion homeostasis		1.22E-03	1.00E+00	8.23E-03	6.19E-02	4	546	TAC1,PTHLH,ADCYAP1,NMB
GO: Biological Process	GO:0060986	endocrine hormone secretion		1.26E-03	1.00E+00	8.40E-03	6.32E-02	2	59	TAC1,CRH
GO: Biological Process	GO:0030073	insulin secretion		1.27E-03	1.00E+00	8.40E-03	6.32E-02	3	244	TRH,CRH,ADCYAP1
GO: Biological Process	GO:0031349	positive regulation of defense response		1.33E-03	1.00E+00	8.80E-03	6.62E-02	4	559	TAC1,CRH,CCK,PENK
GO: Biological Process	GO:0060443	mammary gland morphogenesis		1.35E-03	1.00E+00	8.83E-03	6.64E-02	2	61	PTHLH,RLN1
GO: Biological Process	GO:0007626	locomotory behavior		1.40E-03	1.00E+00	9.14E-03	6.88E-02	3	253	TRH,CRH,PENK
GO: Biological Process	GO:0014009	glial cell proliferation		1.48E-03	1.00E+00	9.53E-03	7.17E-02	2	64	ADCYAP1,PENK
GO: Biological Process	GO:0048512	circadian behavior		1.48E-03	1.00E+00	9.53E-03	7.17E-02	2	64	CORT,CRH
GO: Biological Process	GO:0009991	response to extracellular stimulus		1.51E-03	1.00E+00	9.65E-03	7.26E-02	4	578	NPY,ADCYAP1,CCK,PENK
GO: Biological Process	GO:1903531	negative regulation of secretion by cell		1.55E-03	1.00E+00	9.86E-03	7.42E-02	3	262	TRH,CRH,NMB
GO: Biological Process	GO:0033993	response to lipid		1.57E-03	1.00E+00	9.89E-03	7.44E-02	5	1009	TRH,TAC1,CRH,ADCYAP1,PENK
GO: Biological Process	GO:0007622	rhythmic behavior		1.57E-03	1.00E+00	9.89E-03	7.44E-02	2	66	CORT,CRH
GO: Biological Process	GO:0071385	cellular response to glucocorticoid stimulus		1.62E-03	1.00E+00	1.00E-02	7.55E-02	2	67	CRH,ADCYAP1
GO: Biological Process	GO:1903793	positive regulation of anion transport		1.62E-03	1.00E+00	1.00E-02	7.55E-02	2	67	TRH,CCK
GO: Biological Process	GO:0072507	divalent inorganic cation homeostasis		1.63E-03	1.00E+00	1.00E-02	7.55E-02	4	590	TAC1,PTHLH,ADCYAP1,NMB
GO: Biological Process	GO:0002791	regulation of peptide secretion		1.64E-03	1.00E+00	1.00E-02	7.55E-02	4	591	TRH,GRP,CRH,ADCYAP1
GO: Biological Process	GO:0009636	response to toxic substance		1.67E-03	1.00E+00	1.01E-02	7.61E-02	4	594	TRH,CRH,ADCYAP1,PENK
GO: Biological Process	GO:0008542	visual learning		1.67E-03	1.00E+00	1.01E-02	7.61E-02	2	68	CCK,NTS
GO: Biological Process	GO:0071384	cellular response to corticosteroid stimulus		1.77E-03	1.00E+00	1.06E-02	7.98E-02	2	70	CRH,ADCYAP1
GO: Biological Process	GO:0051867	general adaptation syndrome, behavioral process		1.79E-03	1.00E+00	1.06E-02	7.98E-02	1	2	PENK
GO: Biological Process	GO:0032812	positive regulation of epinephrine secretion		1.79E-03	1.00E+00	1.06E-02	7.98E-02	1	2	VIP
GO: Biological Process	GO:0060658	nipple morphogenesis		1.79E-03	1.00E+00	1.06E-02	7.98E-02	1	2	PTHLH
GO: Biological Process	GO:0032370	positive regulation of lipid transport		1.87E-03	1.00E+00	1.10E-02	8.28E-02	2	72	TAC1,CRH
GO: Biological Process	GO:0007632	visual behavior		1.92E-03	1.00E+00	1.13E-02	8.46E-02	2	73	CCK,NTS
GO: Biological Process	GO:0009725	response to hormone		1.98E-03	1.00E+00	1.15E-02	8.67E-02	5	1063	TRH,TAC1,CRH,ADCYAP1,PENK
GO: Biological Process	GO:0014070	response to organic cyclic compound		2.12E-03	1.00E+00	1.23E-02	9.21E-02	5	1079	TRH,TAC1,CRH,ADCYAP1,PENK
GO: Biological Process	GO:0050433	regulation of catecholamine secretion		2.14E-03	1.00E+00	1.23E-02	9.24E-02	2	77	VIP,CRH
GO: Biological Process	GO:0097755	positive regulation of blood vessel diameter		2.19E-03	1.00E+00	1.25E-02	9.41E-02	2	78	VIP,ADCYAP1
GO: Biological Process	GO:0051048	negative regulation of secretion		2.20E-03	1.00E+00	1.25E-02	9.41E-02	3	296	TRH,CRH,NMB
GO: Biological Process	GO:0051705	multi-organism behavior		2.25E-03	1.00E+00	1.27E-02	9.56E-02	2	79	GRP,PENK
GO: Biological Process	GO:0015850	organic hydroxy compound transport		2.28E-03	1.00E+00	1.29E-02	9.67E-02	3	300	VIP,TAC1,CRH
GO: Biological Process	GO:0050432	catecholamine secretion		2.36E-03	1.00E+00	1.32E-02	9.94E-02	2	81	VIP,CRH
GO: Biological Process	GO:0015800	acidic amino acid transport		2.42E-03	1.00E+00	1.35E-02	1.01E-01	2	82	TRH,CCK
GO: Biological Process	GO:0021536	diencephalon development		2.48E-03	1.00E+00	1.37E-02	1.03E-01	2	83	CRH,ADCYAP1
GO: Biological Process	GO:0032890	regulation of organic acid transport		2.54E-03	1.00E+00	1.40E-02	1.05E-01	2	84	TRH,CCK
GO: Biological Process	GO:0002877	regulation of acute inflammatory response to non-antigenic stimulus		2.69E-03	1.00E+00	1.47E-02	1.10E-01	1	3	ADCYAP1
GO: Biological Process	GO:0051866	general adaptation syndrome		2.69E-03	1.00E+00	1.47E-02	1.10E-01	1	3	PENK
GO: Biological Process	GO:0009410	response to xenobiotic stimulus		2.79E-03	1.00E+00	1.51E-02	1.14E-01	3	322	TAC1,CRH,PENK
GO: Biological Process	GO:0032024	positive regulation of insulin secretion		2.84E-03	1.00E+00	1.52E-02	1.15E-01	2	89	TRH,CRH
GO: Biological Process	GO:0046888	negative regulation of hormone secretion		2.84E-03	1.00E+00	1.52E-02	1.15E-01	2	89	CRH,NMB
GO: Biological Process	GO:0009306	protein secretion		2.85E-03	1.00E+00	1.52E-02	1.15E-01	4	688	TRH,VIP,CRH,ADCYAP1
GO: Biological Process	GO:0035592	establishment of protein localization to extracellular region		2.87E-03	1.00E+00	1.52E-02	1.15E-01	4	689	TRH,VIP,CRH,ADCYAP1
GO: Biological Process	GO:0071692	protein localization to extracellular region		2.99E-03	1.00E+00	1.58E-02	1.19E-01	4	697	TRH,VIP,CRH,ADCYAP1
GO: Biological Process	GO:0006836	neurotransmitter transport		3.09E-03	1.00E+00	1.63E-02	1.22E-01	3	334	TRH,CRH,ADCYAP1
GO: Biological Process	GO:1905954	positive regulation of lipid localization		3.16E-03	1.00E+00	1.65E-02	1.24E-01	2	94	TAC1,CRH
GO: Biological Process	GO:0060548	negative regulation of cell death		3.27E-03	1.00E+00	1.70E-02	1.28E-01	5	1192	VIP,CRH,SET,ADCYAP1,RLN1
GO: Biological Process	GO:0051937	catecholamine transport		3.29E-03	1.00E+00	1.71E-02	1.28E-01	2	96	VIP,CRH
GO: Biological Process	GO:0042493	response to drug		3.41E-03	1.00E+00	1.72E-02	1.29E-01	5	1203	TRH,TAC1,CRH,ADCYAP1,PENK
GO: Biological Process	GO:0044057	regulation of system process		3.45E-03	1.00E+00	1.72E-02	1.29E-01	4	725	VIP,TAC1,CRH,CCK
GO: Biological Process	GO:0043270	positive regulation of ion transport		3.53E-03	1.00E+00	1.72E-02	1.29E-01	3	350	TRH,CRH,CCK
GO: Biological Process	GO:0099538	synaptic signaling via neuropeptide		3.58E-03	1.00E+00	1.72E-02	1.29E-01	1	4	PENK
GO: Biological Process	GO:0090274	positive regulation of somatostatin secretion		3.58E-03	1.00E+00	1.72E-02	1.29E-01	1	4	ADCYAP1
GO: Biological Process	GO:0001692	histamine metabolic process		3.58E-03	1.00E+00	1.72E-02	1.29E-01	1	4	TRH
GO: Biological Process	GO:0042322	negative regulation of circadian sleep/wake cycle, REM sleep		3.58E-03	1.00E+00	1.72E-02	1.29E-01	1	4	CRH
GO: Biological Process	GO:0061182	negative regulation of chondrocyte development		3.58E-03	1.00E+00	1.72E-02	1.29E-01	1	4	PTHLH
GO: Biological Process	GO:1900738	positive regulation of phospholipase C-activating G protein-coupled receptor signaling pathway		3.58E-03	1.00E+00	1.72E-02	1.29E-01	1	4	GRP
GO: Biological Process	GO:0032097	positive regulation of response to food		3.58E-03	1.00E+00	1.72E-02	1.29E-01	1	4	NPY
GO: Biological Process	GO:0032100	positive regulation of appetite		3.58E-03	1.00E+00	1.72E-02	1.29E-01	1	4	NPY
GO: Biological Process	GO:0071314	cellular response to cocaine		3.58E-03	1.00E+00	1.72E-02	1.29E-01	1	4	CRH
GO: Biological Process	GO:0046878	positive regulation of saliva secretion		3.58E-03	1.00E+00	1.72E-02	1.29E-01	1	4	TAC1
GO: Biological Process	GO:0036343	psychomotor behavior		3.58E-03	1.00E+00	1.72E-02	1.29E-01	1	4	GRP
GO: Biological Process	GO:0002525	acute inflammatory response to non-antigenic stimulus		3.58E-03	1.00E+00	1.72E-02	1.29E-01	1	4	ADCYAP1
GO: Biological Process	GO:0060648	mammary gland bud morphogenesis		3.58E-03	1.00E+00	1.72E-02	1.29E-01	1	4	PTHLH
GO: Biological Process	GO:0055065	metal ion homeostasis		3.85E-03	1.00E+00	1.84E-02	1.38E-01	4	748	TAC1,PTHLH,ADCYAP1,NMB
GO: Biological Process	GO:0050886	endocrine process		3.93E-03	1.00E+00	1.87E-02	1.40E-01	2	105	TAC1,CRH
GO: Biological Process	GO:0007204	positive regulation of cytosolic calcium ion concentration		4.06E-03	1.00E+00	1.92E-02	1.44E-01	3	368	TAC1,ADCYAP1,NMB
GO: Biological Process	GO:0007200	phospholipase C-activating G protein-coupled receptor signaling pathway		4.07E-03	1.00E+00	1.92E-02	1.44E-01	2	107	VIP,GRP
GO: Biological Process	GO:0046942	carboxylic acid transport		4.22E-03	1.00E+00	1.98E-02	1.49E-01	3	373	TRH,CCK,NMB
GO: Biological Process	GO:0015849	organic acid transport		4.25E-03	1.00E+00	1.98E-02	1.49E-01	3	374	TRH,CCK,NMB
GO: Biological Process	GO:0033685	negative regulation of luteinizing hormone secretion		4.48E-03	1.00E+00	2.03E-02	1.53E-01	1	5	CRH
GO: Biological Process	GO:1900736	regulation of phospholipase C-activating G protein-coupled receptor signaling pathway		4.48E-03	1.00E+00	2.03E-02	1.53E-01	1	5	GRP
GO: Biological Process	GO:0051464	positive regulation of cortisol secretion		4.48E-03	1.00E+00	2.03E-02	1.53E-01	1	5	CRH
GO: Biological Process	GO:0061181	regulation of chondrocyte development		4.48E-03	1.00E+00	2.03E-02	1.53E-01	1	5	PTHLH
GO: Biological Process	GO:1903999	negative regulation of eating behavior		4.48E-03	1.00E+00	2.03E-02	1.53E-01	1	5	CCK
GO: Biological Process	GO:0010841	positive regulation of circadian sleep/wake cycle, wakefulness		4.48E-03	1.00E+00	2.03E-02	1.53E-01	1	5	CRH
GO: Biological Process	GO:0007589	body fluid secretion		4.61E-03	1.00E+00	2.08E-02	1.56E-01	2	114	VIP,TAC1
GO: Biological Process	GO:0006835	dicarboxylic acid transport		4.61E-03	1.00E+00	2.08E-02	1.56E-01	2	114	TRH,CCK
GO: Biological Process	GO:0015844	monoamine transport		4.77E-03	1.00E+00	2.14E-02	1.61E-01	2	116	VIP,CRH
GO: Biological Process	GO:0022600	digestive system process		5.01E-03	1.00E+00	2.24E-02	1.68E-01	2	119	TAC1,CRH
GO: Biological Process	GO:0048545	response to steroid hormone		5.31E-03	1.00E+00	2.29E-02	1.72E-01	3	405	TRH,CRH,ADCYAP1
GO: Biological Process	GO:0043266	regulation of potassium ion transport		5.34E-03	1.00E+00	2.29E-02	1.72E-01	2	123	VIP,ADCYAP1
GO: Biological Process	GO:0090273	regulation of somatostatin secretion		5.37E-03	1.00E+00	2.29E-02	1.72E-01	1	6	ADCYAP1
GO: Biological Process	GO:0032109	positive regulation of response to nutrient levels		5.37E-03	1.00E+00	2.29E-02	1.72E-01	1	6	NPY
GO: Biological Process	GO:0032106	positive regulation of response to extracellular stimulus		5.37E-03	1.00E+00	2.29E-02	1.72E-01	1	6	NPY
GO: Biological Process	GO:0070093	negative regulation of glucagon secretion		5.37E-03	1.00E+00	2.29E-02	1.72E-01	1	6	CRH
GO: Biological Process	GO:0043400	cortisol secretion		5.37E-03	1.00E+00	2.29E-02	1.72E-01	1	6	CRH
GO: Biological Process	GO:0002865	negative regulation of acute inflammatory response to antigenic stimulus		5.37E-03	1.00E+00	2.29E-02	1.72E-01	1	6	ADCYAP1
GO: Biological Process	GO:0071651	positive regulation of chemokine (C-C motif) ligand 5 production		5.37E-03	1.00E+00	2.29E-02	1.72E-01	1	6	ADCYAP1
GO: Biological Process	GO:0051462	regulation of cortisol secretion		5.37E-03	1.00E+00	2.29E-02	1.72E-01	1	6	CRH
GO: Biological Process	GO:0008628	hormone-mediated apoptotic signaling pathway		5.37E-03	1.00E+00	2.29E-02	1.72E-01	1	6	CRH
GO: Biological Process	GO:0006869	lipid transport		5.46E-03	1.00E+00	2.32E-02	1.74E-01	3	409	TAC1,CRH,NMB
GO: Biological Process	GO:0044070	regulation of anion transport		5.60E-03	1.00E+00	2.36E-02	1.77E-01	2	126	TRH,CCK
GO: Biological Process	GO:0007202	activation of phospholipase C activity		5.60E-03	1.00E+00	2.36E-02	1.77E-01	2	126	VIP,GRP
GO: Biological Process	GO:0055080	cation homeostasis		5.63E-03	1.00E+00	2.36E-02	1.78E-01	4	832	TAC1,PTHLH,ADCYAP1,NMB
GO: Biological Process	GO:0006811	ion transport		5.74E-03	1.00E+00	2.40E-02	1.80E-01	6	1964	TRH,VIP,CRH,ADCYAP1,CCK,NMB
GO: Biological Process	GO:0051480	regulation of cytosolic calcium ion concentration		5.80E-03	1.00E+00	2.41E-02	1.81E-01	3	418	TAC1,ADCYAP1,NMB
GO: Biological Process	GO:0010941	regulation of cell death		5.81E-03	1.00E+00	2.41E-02	1.81E-01	6	1969	VIP,CRH,SET,ADCYAP1,CCK,RLN1
GO: Biological Process	GO:0042752	regulation of circadian rhythm		5.95E-03	1.00E+00	2.46E-02	1.85E-01	2	130	CORT,CRH
GO: Biological Process	GO:0098771	inorganic ion homeostasis		5.97E-03	1.00E+00	2.46E-02	1.85E-01	4	846	TAC1,PTHLH,ADCYAP1,NMB
GO: Biological Process	GO:0002526	acute inflammatory response		6.04E-03	1.00E+00	2.46E-02	1.85E-01	2	131	TAC1,ADCYAP1
GO: Biological Process	GO:0009628	response to abiotic stimulus		6.04E-03	1.00E+00	2.46E-02	1.85E-01	5	1375	TRH,TAC1,CCK,NTS,PENK
GO: Biological Process	GO:0014054	positive regulation of gamma-aminobutyric acid secretion		6.26E-03	1.00E+00	2.53E-02	1.91E-01	1	7	TRH
GO: Biological Process	GO:0051461	positive regulation of corticotropin secretion		6.26E-03	1.00E+00	2.53E-02	1.91E-01	1	7	CRH
GO: Biological Process	GO:0010863	positive regulation of phospholipase C activity		6.59E-03	1.00E+00	2.66E-02	2.00E-01	2	137	VIP,GRP
GO: Biological Process	GO:0090087	regulation of peptide transport		6.70E-03	1.00E+00	2.69E-02	2.02E-01	4	874	TRH,GRP,CRH,ADCYAP1
GO: Biological Process	GO:0030900	forebrain development		6.81E-03	1.00E+00	2.72E-02	2.05E-01	3	443	CRH,NPY,ADCYAP1
GO: Biological Process	GO:0015696	ammonium transport		6.87E-03	1.00E+00	2.73E-02	2.06E-01	2	140	CRH,ADCYAP1
GO: Biological Process	GO:0001503	ossification		6.89E-03	1.00E+00	2.73E-02	2.06E-01	3	445	TAC1,PTHLH,PENK
GO: Biological Process	GO:1900274	regulation of phospholipase C activity		6.96E-03	1.00E+00	2.73E-02	2.06E-01	2	141	VIP,GRP
GO: Biological Process	GO:0010876	lipid localization		7.02E-03	1.00E+00	2.73E-02	2.06E-01	3	448	TAC1,CRH,NMB
GO: Biological Process	GO:0051345	positive regulation of hydrolase activity		7.08E-03	1.00E+00	2.73E-02	2.06E-01	4	888	VIP,GRP,ADCYAP1,CCK
GO: Biological Process	GO:0061744	motor behavior		7.15E-03	1.00E+00	2.73E-02	2.06E-01	1	8	GRP
GO: Biological Process	GO:0042746	circadian sleep/wake cycle, wakefulness		7.15E-03	1.00E+00	2.73E-02	2.06E-01	1	8	CRH
GO: Biological Process	GO:0070459	prolactin secretion		7.15E-03	1.00E+00	2.73E-02	2.06E-01	1	8	VIP
GO: Biological Process	GO:0010840	regulation of circadian sleep/wake cycle, wakefulness		7.15E-03	1.00E+00	2.73E-02	2.06E-01	1	8	CRH
GO: Biological Process	GO:0051459	regulation of corticotropin secretion		7.15E-03	1.00E+00	2.73E-02	2.06E-01	1	8	CRH
GO: Biological Process	GO:0070253	somatostatin secretion		7.15E-03	1.00E+00	2.73E-02	2.06E-01	1	8	ADCYAP1
GO: Biological Process	GO:0042321	negative regulation of circadian sleep/wake cycle, sleep		7.15E-03	1.00E+00	2.73E-02	2.06E-01	1	8	CRH
GO: Biological Process	GO:0051336	regulation of hydrolase activity		7.32E-03	1.00E+00	2.79E-02	2.10E-01	5	1439	VIP,GRP,SET,ADCYAP1,CCK
GO: Biological Process	GO:0032368	regulation of lipid transport		7.45E-03	1.00E+00	2.83E-02	2.13E-01	2	146	TAC1,CRH
GO: Biological Process	GO:0035270	endocrine system development		7.55E-03	1.00E+00	2.85E-02	2.15E-01	2	147	CRH,ADCYAP1
GO: Biological Process	GO:0010959	regulation of metal ion transport		7.87E-03	1.00E+00	2.95E-02	2.22E-01	3	467	VIP,CRH,ADCYAP1
GO: Biological Process	GO:0060406	positive regulation of penile erection		8.04E-03	1.00E+00	2.95E-02	2.22E-01	1	9	VIP
GO: Biological Process	GO:0014050	negative regulation of glutamate secretion		8.04E-03	1.00E+00	2.95E-02	2.22E-01	1	9	TRH
GO: Biological Process	GO:0032277	negative regulation of gonadotropin secretion		8.04E-03	1.00E+00	2.95E-02	2.22E-01	1	9	CRH
GO: Biological Process	GO:1904058	positive regulation of sensory perception of pain		8.04E-03	1.00E+00	2.95E-02	2.22E-01	1	9	CCK
GO: Biological Process	GO:0033684	regulation of luteinizing hormone secretion		8.04E-03	1.00E+00	2.95E-02	2.22E-01	1	9	CRH
GO: Biological Process	GO:0046877	regulation of saliva secretion		8.04E-03	1.00E+00	2.95E-02	2.22E-01	1	9	TAC1
GO: Biological Process	GO:0042320	regulation of circadian sleep/wake cycle, REM sleep		8.04E-03	1.00E+00	2.95E-02	2.22E-01	1	9	CRH
GO: Biological Process	GO:0010518	positive regulation of phospholipase activity		8.05E-03	1.00E+00	2.95E-02	2.22E-01	2	152	VIP,GRP
GO: Biological Process	GO:0055082	cellular chemical homeostasis		8.32E-03	1.00E+00	3.04E-02	2.28E-01	4	930	TAC1,CRH,ADCYAP1,NMB
GO: Biological Process	GO:0007613	memory		8.36E-03	1.00E+00	3.04E-02	2.29E-01	2	155	TAC1,CCK
GO: Biological Process	GO:0022612	gland morphogenesis		8.67E-03	1.00E+00	3.14E-02	2.36E-01	2	158	PTHLH,RLN1
GO: Biological Process	GO:0051241	negative regulation of multicellular organismal process		8.76E-03	1.00E+00	3.16E-02	2.38E-01	5	1502	TAC1,CRH,PTHLH,ADCYAP1,CCK
GO: Biological Process	GO:0008277	regulation of G protein-coupled receptor signaling pathway		8.88E-03	1.00E+00	3.16E-02	2.38E-01	2	160	GRP,ADCYAP1
GO: Biological Process	GO:0051458	corticotropin secretion		8.93E-03	1.00E+00	3.16E-02	2.38E-01	1	10	CRH
GO: Biological Process	GO:0071649	regulation of chemokine (C-C motif) ligand 5 production		8.93E-03	1.00E+00	3.16E-02	2.38E-01	1	10	ADCYAP1
GO: Biological Process	GO:0002118	aggressive behavior		8.93E-03	1.00E+00	3.16E-02	2.38E-01	1	10	PENK
GO: Biological Process	GO:0032811	negative regulation of epinephrine secretion		8.93E-03	1.00E+00	3.16E-02	2.38E-01	1	10	CRH
GO: Biological Process	GO:0032224	positive regulation of synaptic transmission, cholinergic		8.93E-03	1.00E+00	3.16E-02	2.38E-01	1	10	TAC1
GO: Biological Process	GO:0060193	positive regulation of lipase activity		9.42E-03	1.00E+00	3.30E-02	2.49E-01	2	165	VIP,GRP
GO: Biological Process	GO:0010517	regulation of phospholipase activity		9.42E-03	1.00E+00	3.30E-02	2.49E-01	2	165	VIP,GRP
GO: Biological Process	GO:0030879	mammary gland development		9.53E-03	1.00E+00	3.30E-02	2.49E-01	2	166	PTHLH,RLN1
GO: Biological Process	GO:0009314	response to radiation		9.70E-03	1.00E+00	3.30E-02	2.49E-01	3	504	CCK,NTS,PENK
GO: Biological Process	GO:0006865	amino acid transport		9.76E-03	1.00E+00	3.30E-02	2.49E-01	2	168	TRH,CCK
GO: Biological Process	GO:0048016	inositol phosphate-mediated signaling		9.76E-03	1.00E+00	3.30E-02	2.49E-01	2	168	VIP,GRP
GO: Biological Process	GO:0051901	positive regulation of mitochondrial depolarization		9.82E-03	1.00E+00	3.30E-02	2.49E-01	1	11	CCK
GO: Biological Process	GO:0008343	adult feeding behavior		9.82E-03	1.00E+00	3.30E-02	2.49E-01	1	11	NPY
GO: Biological Process	GO:1903998	regulation of eating behavior		9.82E-03	1.00E+00	3.30E-02	2.49E-01	1	11	CCK
GO: Biological Process	GO:0014062	regulation of serotonin secretion		9.82E-03	1.00E+00	3.30E-02	2.49E-01	1	11	CRH
GO: Biological Process	GO:0042747	circadian sleep/wake cycle, REM sleep		9.82E-03	1.00E+00	3.30E-02	2.49E-01	1	11	CRH
GO: Biological Process	GO:0060405	regulation of penile erection		9.82E-03	1.00E+00	3.30E-02	2.49E-01	1	11	VIP
GO: Biological Process	GO:0010700	negative regulation of norepinephrine secretion		9.82E-03	1.00E+00	3.30E-02	2.49E-01	1	11	CRH
GO: Biological Process	GO:0014052	regulation of gamma-aminobutyric acid secretion		9.82E-03	1.00E+00	3.30E-02	2.49E-01	1	11	TRH
GO: Biological Process	GO:0071609	chemokine (C-C motif) ligand 5 production		9.82E-03	1.00E+00	3.30E-02	2.49E-01	1	11	ADCYAP1
GO: Biological Process	GO:0071495	cellular response to endogenous stimulus		9.90E-03	1.00E+00	3.32E-02	2.50E-01	5	1547	TRH,TAC1,CRH,ADCYAP1,PENK
GO: Biological Process	GO:0042391	regulation of membrane potential		1.05E-02	1.00E+00	3.51E-02	2.64E-01	3	519	TAC1,ADCYAP1,CCK
GO: Biological Process	GO:0052803	imidazole-containing compound metabolic process		1.07E-02	1.00E+00	3.52E-02	2.65E-01	1	12	TRH
GO: Biological Process	GO:0070092	regulation of glucagon secretion		1.07E-02	1.00E+00	3.52E-02	2.65E-01	1	12	CRH
GO: Biological Process	GO:0070444	oligodendrocyte progenitor proliferation		1.07E-02	1.00E+00	3.52E-02	2.65E-01	1	12	ADCYAP1
GO: Biological Process	GO:0070445	regulation of oligodendrocyte progenitor proliferation		1.07E-02	1.00E+00	3.52E-02	2.65E-01	1	12	ADCYAP1
GO: Biological Process	GO:0060124	positive regulation of growth hormone secretion		1.07E-02	1.00E+00	3.52E-02	2.65E-01	1	12	ADCYAP1
GO: Biological Process	GO:1905952	regulation of lipid localization		1.08E-02	1.00E+00	3.53E-02	2.66E-01	2	177	TAC1,CRH
GO: Biological Process	GO:0031644	regulation of nervous system process		1.09E-02	1.00E+00	3.56E-02	2.68E-01	2	178	VIP,CCK
GO: Biological Process	GO:0006874	cellular calcium ion homeostasis		1.11E-02	1.00E+00	3.60E-02	2.71E-01	3	529	TAC1,ADCYAP1,NMB
GO: Biological Process	GO:0050804	modulation of chemical synaptic transmission		1.15E-02	1.00E+00	3.71E-02	2.79E-01	3	536	TAC1,CRH,ADCYAP1
GO: Biological Process	GO:0099177	regulation of trans-synaptic signaling		1.15E-02	1.00E+00	3.71E-02	2.79E-01	3	537	TAC1,CRH,ADCYAP1
GO: Biological Process	GO:0032099	negative regulation of appetite		1.16E-02	1.00E+00	3.71E-02	2.79E-01	1	13	CCK
GO: Biological Process	GO:0070091	glucagon secretion		1.16E-02	1.00E+00	3.71E-02	2.79E-01	1	13	CRH
GO: Biological Process	GO:1904181	positive regulation of membrane depolarization		1.16E-02	1.00E+00	3.71E-02	2.79E-01	1	13	CCK
GO: Biological Process	GO:0032275	luteinizing hormone secretion		1.16E-02	1.00E+00	3.71E-02	2.79E-01	1	13	CRH
GO: Biological Process	GO:0043488	regulation of mRNA stability		1.17E-02	1.00E+00	3.74E-02	2.81E-01	2	185	VIP,SET
GO: Biological Process	GO:0030534	adult behavior		1.20E-02	1.00E+00	3.81E-02	2.86E-01	2	187	TRH,NPY
GO: Biological Process	GO:0015711	organic anion transport		1.22E-02	1.00E+00	3.84E-02	2.89E-01	3	548	TRH,CCK,NMB
GO: Biological Process	GO:0015718	monocarboxylic acid transport		1.22E-02	1.00E+00	3.84E-02	2.89E-01	2	189	TRH,NMB
GO: Biological Process	GO:0072506	trivalent inorganic anion homeostasis		1.25E-02	1.00E+00	3.84E-02	2.89E-01	1	14	PTHLH
GO: Biological Process	GO:0010749	regulation of nitric oxide mediated signal transduction		1.25E-02	1.00E+00	3.84E-02	2.89E-01	1	14	RLN1
GO: Biological Process	GO:0060736	prostate gland growth		1.25E-02	1.00E+00	3.84E-02	2.89E-01	1	14	RLN1
GO: Biological Process	GO:0032096	negative regulation of response to food		1.25E-02	1.00E+00	3.84E-02	2.89E-01	1	14	CCK
GO: Biological Process	GO:0072505	divalent inorganic anion homeostasis		1.25E-02	1.00E+00	3.84E-02	2.89E-01	1	14	PTHLH
GO: Biological Process	GO:0045472	response to ether		1.25E-02	1.00E+00	3.84E-02	2.89E-01	1	14	CRH
GO: Biological Process	GO:0032276	regulation of gonadotropin secretion		1.25E-02	1.00E+00	3.84E-02	2.89E-01	1	14	CRH
GO: Biological Process	GO:0055062	phosphate ion homeostasis		1.25E-02	1.00E+00	3.84E-02	2.89E-01	1	14	PTHLH
GO: Biological Process	GO:0002674	negative regulation of acute inflammatory response		1.25E-02	1.00E+00	3.84E-02	2.89E-01	1	14	ADCYAP1
GO: Biological Process	GO:0043066	negative regulation of apoptotic process		1.25E-02	1.00E+00	3.84E-02	2.89E-01	4	1047	VIP,SET,ADCYAP1,RLN1
GO: Biological Process	GO:0043487	regulation of RNA stability		1.26E-02	1.00E+00	3.85E-02	2.89E-01	2	192	VIP,SET
GO: Biological Process	GO:0060191	regulation of lipase activity		1.27E-02	1.00E+00	3.88E-02	2.91E-01	2	193	VIP,GRP
GO: Biological Process	GO:0051588	regulation of neurotransmitter transport		1.28E-02	1.00E+00	3.90E-02	2.93E-01	2	194	TRH,CRH
GO: Biological Process	GO:0072503	cellular divalent inorganic cation homeostasis		1.31E-02	1.00E+00	3.98E-02	3.00E-01	3	564	TAC1,ADCYAP1,NMB
GO: Biological Process	GO:0010960	magnesium ion homeostasis		1.34E-02	1.00E+00	3.99E-02	3.00E-01	1	15	PTHLH
GO: Biological Process	GO:0002862	negative regulation of inflammatory response to antigenic stimulus		1.34E-02	1.00E+00	3.99E-02	3.00E-01	1	15	ADCYAP1
GO: Biological Process	GO:0010459	negative regulation of heart rate		1.34E-02	1.00E+00	3.99E-02	3.00E-01	1	15	TAC1
GO: Biological Process	GO:0007320	insemination		1.34E-02	1.00E+00	3.99E-02	3.00E-01	1	15	TAC1
GO: Biological Process	GO:0014049	positive regulation of glutamate secretion		1.34E-02	1.00E+00	3.99E-02	3.00E-01	1	15	CCK
GO: Biological Process	GO:0043069	negative regulation of programmed cell death		1.35E-02	1.00E+00	4.01E-02	3.02E-01	4	1070	VIP,SET,ADCYAP1,RLN1
GO: Biological Process	GO:0080134	regulation of response to stress		1.40E-02	1.00E+00	4.14E-02	3.11E-01	5	1683	TAC1,CRH,ADCYAP1,CCK,PENK
GO: Biological Process	GO:0043084	penile erection		1.43E-02	1.00E+00	4.14E-02	3.11E-01	1	16	VIP
GO: Biological Process	GO:0032105	negative regulation of response to extracellular stimulus		1.43E-02	1.00E+00	4.14E-02	3.11E-01	1	16	CCK
GO: Biological Process	GO:0032108	negative regulation of response to nutrient levels		1.43E-02	1.00E+00	4.14E-02	3.11E-01	1	16	CCK
GO: Biological Process	GO:0032230	positive regulation of synaptic transmission, GABAergic		1.43E-02	1.00E+00	4.14E-02	3.11E-01	1	16	TAC1
GO: Biological Process	GO:0043129	surfactant homeostasis		1.43E-02	1.00E+00	4.14E-02	3.11E-01	1	16	PTHLH
GO: Biological Process	GO:0046541	saliva secretion		1.43E-02	1.00E+00	4.14E-02	3.11E-01	1	16	TAC1
GO: Biological Process	GO:0035815	positive regulation of renal sodium excretion		1.43E-02	1.00E+00	4.14E-02	3.11E-01	1	16	TAC1
GO: Biological Process	GO:0032222	regulation of synaptic transmission, cholinergic		1.43E-02	1.00E+00	4.14E-02	3.11E-01	1	16	TAC1
GO: Biological Process	GO:0019725	cellular homeostasis		1.45E-02	1.00E+00	4.19E-02	3.15E-01	4	1093	TAC1,CRH,ADCYAP1,NMB
GO: Biological Process	GO:0061013	regulation of mRNA catabolic process		1.45E-02	1.00E+00	4.19E-02	3.15E-01	2	207	VIP,SET
GO: Biological Process	GO:0050796	regulation of insulin secretion		1.47E-02	1.00E+00	4.22E-02	3.17E-01	2	208	TRH,CRH
GO: Biological Process	GO:0090066	regulation of anatomical structure size		1.51E-02	1.00E+00	4.29E-02	3.22E-01	3	594	VIP,ADCYAP1,NTS
GO: Biological Process	GO:0002864	regulation of acute inflammatory response to antigenic stimulus		1.51E-02	1.00E+00	4.29E-02	3.22E-01	1	17	ADCYAP1
GO: Biological Process	GO:0051956	negative regulation of amino acid transport		1.51E-02	1.00E+00	4.29E-02	3.22E-01	1	17	TRH
GO: Biological Process	GO:0014051	gamma-aminobutyric acid secretion		1.51E-02	1.00E+00	4.29E-02	3.22E-01	1	17	TRH
GO: Biological Process	GO:0001820	serotonin secretion		1.51E-02	1.00E+00	4.29E-02	3.22E-01	1	17	CRH
GO: Biological Process	GO:0035067	negative regulation of histone acetylation		1.51E-02	1.00E+00	4.29E-02	3.22E-01	1	17	SET
GO: Biological Process	GO:1901654	response to ketone		1.55E-02	1.00E+00	4.37E-02	3.28E-01	2	214	TRH,CRH
GO: Biological Process	GO:0001821	histamine secretion		1.60E-02	1.00E+00	4.43E-02	3.33E-01	1	18	ADCYAP1
GO: Biological Process	GO:0045760	positive regulation of action potential		1.60E-02	1.00E+00	4.43E-02	3.33E-01	1	18	TAC1
GO: Biological Process	GO:0060572	morphogenesis of an epithelial bud		1.60E-02	1.00E+00	4.43E-02	3.33E-01	1	18	PTHLH
GO: Biological Process	GO:0048875	chemical homeostasis within a tissue		1.60E-02	1.00E+00	4.43E-02	3.33E-01	1	18	PTHLH
GO: Biological Process	GO:0060253	negative regulation of glial cell proliferation		1.60E-02	1.00E+00	4.43E-02	3.33E-01	1	18	ADCYAP1
GO: Biological Process	GO:0007567	parturition		1.60E-02	1.00E+00	4.43E-02	3.33E-01	1	18	CRH
GO: Biological Process	GO:0060123	regulation of growth hormone secretion		1.60E-02	1.00E+00	4.43E-02	3.33E-01	1	18	ADCYAP1
GO: Biological Process	GO:0071871	response to epinephrine		1.60E-02	1.00E+00	4.43E-02	3.33E-01	1	18	PENK
GO: Biological Process	GO:0030324	lung development		1.64E-02	1.00E+00	4.53E-02	3.41E-01	2	221	CRH,PTHLH
GO: Biological Process	GO:0006704	glucocorticoid biosynthetic process		1.69E-02	1.00E+00	4.63E-02	3.49E-01	1	19	CRH
GO: Biological Process	GO:0032274	gonadotropin secretion		1.69E-02	1.00E+00	4.63E-02	3.49E-01	1	19	CRH
GO: Biological Process	GO:0030323	respiratory tube development		1.70E-02	1.00E+00	4.65E-02	3.50E-01	2	225	CRH,PTHLH
GO: Biological Process	GO:0042981	regulation of apoptotic process		1.75E-02	1.00E+00	4.77E-02	3.59E-01	5	1779	VIP,SET,ADCYAP1,CCK,RLN1
GO: Biological Process	GO:0042754	negative regulation of circadian rhythm		1.78E-02	1.00E+00	4.81E-02	3.62E-01	1	20	CRH
GO: Biological Process	GO:0006337	nucleosome disassembly		1.78E-02	1.00E+00	4.81E-02	3.62E-01	1	20	SET
GO: Biological Process	GO:0051608	histamine transport		1.78E-02	1.00E+00	4.81E-02	3.62E-01	1	20	ADCYAP1
GO: Biological Process	GO:0009749	response to glucose		1.83E-02	1.00E+00	4.94E-02	3.72E-01	2	234	TRH,CRH
GO: Biological Process	GO:0007623	circadian rhythm		1.86E-02	1.00E+00	4.97E-02	3.74E-01	2	236	CORT,CRH
GO: Biological Process	GO:0033604	negative regulation of catecholamine secretion		1.87E-02	1.00E+00	4.97E-02	3.74E-01	1	21	CRH
GO: Biological Process	GO:0015812	gamma-aminobutyric acid transport		1.87E-02	1.00E+00	4.97E-02	3.74E-01	1	21	TRH
GO: Biological Process	GO:0002076	osteoblast development		1.87E-02	1.00E+00	4.97E-02	3.74E-01	1	21	PTHLH
GO: Biological Process	GO:0033605	positive regulation of catecholamine secretion		1.87E-02	1.00E+00	4.97E-02	3.74E-01	1	21	VIP
GO: Biological Process	GO:0043067	regulation of programmed cell death		1.88E-02	1.00E+00	4.99E-02	3.75E-01	5	1811	VIP,SET,ADCYAP1,CCK,RLN1
GO: Cellular Component	GO:0043025	neuronal cell body		1.08E-10	5.07E-09	5.07E-09	2.25E-08	10	734	VIP,TAC1,CRH,NPY,ADCYAP1,CCK,PDYN,PNOC,NTS,PENK
GO: Cellular Component	GO:0044297	cell body		3.23E-10	1.52E-08	7.58E-09	3.36E-08	10	821	VIP,TAC1,CRH,NPY,ADCYAP1,CCK,PDYN,PNOC,NTS,PENK
GO: Cellular Component	GO:0043679	axon terminus		4.95E-10	2.33E-08	7.76E-09	3.44E-08	7	225	NPY,ADCYAP1,CCK,PDYN,PNOC,NTS,PENK
GO: Cellular Component	GO:0044306	neuron projection terminus		9.23E-10	4.34E-08	1.09E-08	4.81E-08	7	246	NPY,ADCYAP1,CCK,PDYN,PNOC,NTS,PENK
GO: Cellular Component	GO:0036477	somatodendritic compartment		5.41E-09	2.54E-07	4.83E-08	2.14E-07	10	1098	VIP,TAC1,CRH,NPY,ADCYAP1,CCK,PDYN,PNOC,NTS,PENK
GO: Cellular Component	GO:0043204	perikaryon		7.57E-09	3.56E-07	4.83E-08	2.14E-07	6	182	VIP,CRH,NPY,ADCYAP1,CCK,PENK
GO: Cellular Component	GO:0033267	axon part		7.85E-09	3.69E-07	4.83E-08	2.14E-07	8	543	CRH,NPY,ADCYAP1,CCK,PDYN,PNOC,NTS,PENK
GO: Cellular Component	GO:0030424	axon		8.22E-09	3.86E-07	4.83E-08	2.14E-07	9	815	TAC1,CRH,NPY,ADCYAP1,CCK,PDYN,PNOC,NTS,PENK
GO: Cellular Component	GO:0043005	neuron projection		1.35E-08	6.37E-07	7.07E-08	3.14E-07	11	1621	VIP,TAC1,CRH,NPY,ADCYAP1,CCK,PDYN,PNOC,NTS,PENK,NMB
GO: Cellular Component	GO:0150034	distal axon		4.38E-08	2.06E-06	2.06E-07	9.13E-07	7	430	NPY,ADCYAP1,CCK,PDYN,PNOC,NTS,PENK
GO: Cellular Component	GO:0098898	dense core granule lumen		7.26E-07	3.41E-05	2.84E-06	1.26E-05	2	2	PDYN,PENK
GO: Cellular Component	GO:0099013	neuronal dense core vesicle lumen		7.26E-07	3.41E-05	2.84E-06	1.26E-05	2	2	PDYN,PENK
GO: Cellular Component	GO:0098793	presynapse		1.12E-06	5.27E-05	4.05E-06	1.80E-05	7	694	NPY,ADCYAP1,CCK,PDYN,PNOC,NTS,PENK
GO: Cellular Component	GO:0044456	synapse part		4.52E-05	2.12E-03	1.49E-04	6.62E-04	7	1218	NPY,ADCYAP1,CCK,PDYN,PNOC,NTS,PENK
GO: Cellular Component	GO:0098992	neuronal dense core vesicle		4.76E-05	2.24E-03	1.49E-04	6.62E-04	2	12	PDYN,PENK
GO: Cellular Component	GO:0120038	plasma membrane bounded cell projection part		6.30E-05	2.96E-03	1.74E-04	7.73E-04	8	1784	CRH,NPY,ADCYAP1,CCK,PDYN,PNOC,NTS,PENK
GO: Cellular Component	GO:0044463	cell projection part		6.30E-05	2.96E-03	1.74E-04	7.73E-04	8	1784	CRH,NPY,ADCYAP1,CCK,PDYN,PNOC,NTS,PENK
GO: Cellular Component	GO:0045202	synapse		1.50E-04	7.05E-03	3.92E-04	1.74E-03	7	1471	NPY,ADCYAP1,CCK,PDYN,PNOC,NTS,PENK
GO: Cellular Component	GO:0043195	terminal bouton		1.93E-04	9.07E-03	4.77E-04	2.12E-03	3	131	NPY,ADCYAP1,CCK
GO: Cellular Component	GO:0031045	dense core granule		3.11E-04	1.46E-02	7.31E-04	3.24E-03	2	30	PDYN,PENK
GO: Cellular Component	GO:0034592	synaptic vesicle lumen		8.77E-04	4.12E-02	1.96E-03	8.71E-03	1	1	PENK
GO: Cellular Component	GO:0044304	main axon		2.54E-03	1.19E-01	5.18E-03	2.30E-02	2	86	CRH,CCK
GO: Cellular Component	GO:0034774	secretory granule lumen		2.62E-03	1.23E-01	5.18E-03	2.30E-02	3	322	GRP,PDYN,PENK
GO: Cellular Component	GO:0060205	cytoplasmic vesicle lumen		2.71E-03	1.27E-01	5.18E-03	2.30E-02	3	326	GRP,PDYN,PENK
GO: Cellular Component	GO:0031983	vesicle lumen		2.76E-03	1.30E-01	5.18E-03	2.30E-02	3	328	GRP,PDYN,PENK
GO: Cellular Component	GO:0097447	dendritic tree		4.11E-03	1.93E-01	7.15E-03	3.17E-02	4	779	CCK,PDYN,PNOC,PENK
GO: Cellular Component	GO:0030425	dendrite		4.11E-03	1.93E-01	7.15E-03	3.17E-02	4	779	CCK,PDYN,PNOC,PENK
GO: Cellular Component	GO:0030133	transport vesicle		6.47E-03	3.04E-01	1.08E-02	4.78E-02	3	445	PDYN,NTS,PENK
GO: Cellular Component	GO:0030141	secretory granule		6.64E-03	3.12E-01	1.08E-02	4.78E-02	4	892	TRH,GRP,PDYN,PENK
GO: Cellular Component	GO:0043203	axon hillock		7.86E-03	3.70E-01	1.23E-02	5.47E-02	1	9	CCK
GO: Cellular Component	GO:0032280	symmetric synapse		9.60E-03	4.51E-01	1.46E-02	6.46E-02	1	11	PENK
GO: Cellular Component	GO:0070852	cell body fiber		1.05E-02	4.92E-01	1.54E-02	6.82E-02	1	12	PENK
GO: Cellular Component	GO:0099503	secretory vesicle		1.29E-02	6.05E-01	1.83E-02	8.14E-02	4	1080	TRH,GRP,PDYN,PENK
GO: Cellular Component	GO:0043240	Fanconi anaemia nuclear complex		1.39E-02	6.55E-01	1.87E-02	8.30E-02	1	16	CORT
GO: Cellular Component	GO:0043196	varicosity		1.39E-02	6.55E-01	1.87E-02	8.30E-02	1	16	CRH
GO: Cellular Component	GO:0008021	synaptic vesicle		1.85E-02	8.71E-01	2.42E-02	1.07E-01	2	241	PDYN,PENK
GO: Cellular Component	GO:0043194	axon initial segment		2.00E-02	9.39E-01	2.54E-02	1.13E-01	1	23	CCK
GO: Cellular Component	GO:0070382	exocytic vesicle		2.12E-02	9.97E-01	2.62E-02	1.17E-01	2	259	PDYN,PENK
Mouse Phenotype	MP:0005118	decreased circulating pituitary hormone level		8.42E-09	7.37E-06	7.37E-06	5.42E-05	6	103	TRH,VIP,CORT,CRH,TAC3,ADCYAP1
Mouse Phenotype	MP:0003972	decreased pituitary hormone level		2.58E-08	2.26E-05	1.13E-05	8.31E-05	6	124	TRH,VIP,CORT,CRH,TAC3,ADCYAP1
Mouse Phenotype	MP:0005116	abnormal circulating pituitary hormone level		3.18E-07	2.79E-04	9.29E-05	6.83E-04	6	189	TRH,VIP,CORT,CRH,TAC3,ADCYAP1
Mouse Phenotype	MP:0003965	abnormal pituitary hormone level		8.43E-07	7.38E-04	1.85E-04	1.36E-03	6	223	TRH,VIP,CORT,CRH,TAC3,ADCYAP1
Mouse Phenotype	MP:0003363	decreased circulating gonadotropin level		2.42E-06	2.12E-03	4.24E-04	3.12E-03	4	62	VIP,CORT,TAC3,ADCYAP1
Mouse Phenotype	MP:0005418	abnormal circulating hormone level		5.33E-06	4.67E-03	7.78E-04	5.72E-03	9	966	TRH,VIP,CORT,CRH,PTHLH,TAC3,ADCYAP1,PDYN,NTS
Mouse Phenotype	MP:0003953	abnormal hormone level		1.32E-05	1.16E-02	1.65E-03	1.22E-02	9	1078	TRH,VIP,CORT,CRH,PTHLH,TAC3,ADCYAP1,PDYN,NTS
Mouse Phenotype	MP:0001362	abnormal anxiety-related response		1.58E-05	1.39E-02	1.73E-03	1.27E-02	6	370	TAC1,CRH,NPY,ADCYAP1,PDYN,PENK
Mouse Phenotype	MP:0003361	abnormal circulating gonadotropin level		2.65E-05	2.32E-02	2.58E-03	1.90E-02	4	113	VIP,CORT,TAC3,ADCYAP1
Mouse Phenotype	MP:0002065	abnormal fear/anxiety-related behavior		3.03E-05	2.66E-02	2.66E-03	1.95E-02	6	415	TAC1,CRH,NPY,ADCYAP1,PDYN,PENK
Mouse Phenotype	MP:0003367	increased circulating glucocorticoid level		9.10E-05	7.97E-02	6.65E-03	4.89E-02	3	56	CRH,ADCYAP1,PDYN
Mouse Phenotype	MP:0001745	increased circulating corticosterone level		9.10E-05	7.97E-02	6.65E-03	4.89E-02	3	56	CRH,ADCYAP1,PDYN
Mouse Phenotype	MP:0001364	decreased anxiety-related response		1.31E-04	1.15E-01	8.32E-03	6.12E-02	4	170	TAC1,CRH,ADCYAP1,PDYN
Mouse Phenotype	MP:0005661	decreased circulating adrenaline level		1.33E-04	1.16E-01	8.32E-03	6.12E-02	2	11	CRH,ADCYAP1
Mouse Phenotype	MP:0003867	increased defecation amount		2.19E-04	1.92E-01	1.28E-02	9.42E-02	2	14	NPY,PDYN
Mouse Phenotype	MP:0020147	abnormal defecation amount		2.53E-04	2.22E-01	1.38E-02	1.02E-01	2	15	NPY,PDYN
Mouse Phenotype	MP:0005345	abnormal circulating corticosterone level		3.61E-04	3.16E-01	1.74E-02	1.28E-01	3	89	CRH,ADCYAP1,PDYN
Mouse Phenotype	MP:0005121	decreased circulating prolactin level		3.67E-04	3.22E-01	1.74E-02	1.28E-01	2	18	CORT,ADCYAP1
Mouse Phenotype	MP:0002572	abnormal emotion/affect behavior		3.90E-04	3.42E-01	1.74E-02	1.28E-01	6	658	TAC1,CRH,NPY,ADCYAP1,PDYN,PENK
Mouse Phenotype	MP:0003366	abnormal circulating glucocorticoid level		3.98E-04	3.49E-01	1.74E-02	1.28E-01	3	92	CRH,ADCYAP1,PDYN
Mouse Phenotype	MP:0003963	abnormal corticosterone level		4.65E-04	4.07E-01	1.94E-02	1.43E-01	3	97	CRH,ADCYAP1,PDYN
Mouse Phenotype	MP:0005660	abnormal circulating adrenaline level		5.53E-04	4.84E-01	2.20E-02	1.62E-01	2	22	CRH,ADCYAP1
Mouse Phenotype	MP:0001938	delayed sexual maturation		7.16E-04	6.27E-01	2.61E-02	1.92E-01	2	25	TAC3,RLN1
Mouse Phenotype	MP:0005138	decreased prolactin level		7.16E-04	6.27E-01	2.61E-02	1.92E-01	2	25	CORT,ADCYAP1
Mouse Phenotype	MP:0020473	abnormal circadian behavior phase		8.36E-04	7.32E-01	2.93E-02	2.15E-01	2	27	VIP,ADCYAP1
Mouse Phenotype	MP:0020470	shortened circadian behavior period		8.99E-04	7.88E-01	3.03E-02	2.23E-01	2	28	VIP,ADCYAP1
Mouse Phenotype	MP:0001980	abnormal chemically-elicited antinociception		1.10E-03	9.66E-01	3.53E-02	2.60E-01	2	31	PDYN,PENK
Mouse Phenotype	MP:0001440	abnormal grooming behavior		1.19E-03	1.00E+00	3.53E-02	2.60E-01	3	134	GRP,ADCYAP1,NMB
Mouse Phenotype	MP:0001968	abnormal touch/ nociception		1.22E-03	1.00E+00	3.53E-02	2.60E-01	4	306	TAC1,PDYN,PNOC,PENK
Mouse Phenotype	MP:0009745	abnormal behavioral response to xenobiotic		1.22E-03	1.00E+00	3.53E-02	2.60E-01	4	306	NPY,PDYN,PNOC,PENK
Mouse Phenotype	MP:0003962	abnormal adrenaline level		1.25E-03	1.00E+00	3.53E-02	2.60E-01	2	33	CRH,ADCYAP1
Mouse Phenotype	MP:0003970	abnormal prolactin level		1.33E-03	1.00E+00	3.63E-02	2.67E-01	2	34	CORT,ADCYAP1
Mouse Phenotype	MP:0020468	abnormal circadian behavior period		1.57E-03	1.00E+00	3.92E-02	2.88E-01	2	37	VIP,ADCYAP1
Mouse Phenotype	MP:0030449	tooth ankylosis		1.61E-03	1.00E+00	3.92E-02	2.88E-01	1	1	PTHLH
Mouse Phenotype	MP:0011067	abnormal somatostatin level		1.61E-03	1.00E+00	3.92E-02	2.88E-01	1	1	CORT
Mouse Phenotype	MP:0013366	adrenal gland atrophy		1.61E-03	1.00E+00	3.92E-02	2.88E-01	1	1	CRH
Mouse Phenotype	MP:0000188	abnormal circulating glucose level		1.79E-03	1.00E+00	4.23E-02	3.11E-01	6	877	TRH,CORT,CRH,PTHLH,ADCYAP1,PDYN
Mouse Phenotype	MP:0002790	decreased circulating follicle stimulating hormone level		1.83E-03	1.00E+00	4.23E-02	3.11E-01	2	40	VIP,TAC3
Mouse Phenotype	MP:0003966	abnormal adrenocorticotropin level		1.93E-03	1.00E+00	4.33E-02	3.18E-01	2	41	CORT,CRH
Mouse Phenotype	MP:0012323	increased total tissue mass		2.13E-03	1.00E+00	4.55E-02	3.35E-01	4	356	CRH,TAC3,PDYN,NTS
Mouse Phenotype	MP:0001260	increased body weight		2.13E-03	1.00E+00	4.55E-02	3.35E-01	4	356	CRH,TAC3,PDYN,NTS
Mouse Phenotype	MP:0005478	decreased circulating thyroxine level		2.32E-03	1.00E+00	4.72E-02	3.47E-01	2	45	TRH,PDYN
Mouse Phenotype	MP:0002695	abnormal circulating glucagon level		2.32E-03	1.00E+00	4.72E-02	3.47E-01	2	45	CRH,PDYN
Domain	PS01252	OPIOIDS_PRECURSOR	PROSITE	7.45E-10	4.77E-08	1.59E-08	7.54E-08	3	3	PDYN,PNOC,PENK
Domain	PF01160	Opiods_neuropep	Pfam	7.45E-10	4.77E-08	1.59E-08	7.54E-08	3	3	PDYN,PNOC,PENK
Domain	IPR006024	Opioid_neupept	InterPro	7.45E-10	4.77E-08	1.59E-08	7.54E-08	3	3	PDYN,PNOC,PENK
Domain	IPR015674	Gastrin-RP	InterPro	8.73E-07	5.59E-05	7.98E-06	3.79E-05	2	2	GRP,NMB
Domain	PS00257	BOMBESIN	PROSITE	8.73E-07	5.59E-05	7.98E-06	3.79E-05	2	2	GRP,NMB
Domain	PF02044	Bombesin	Pfam	8.73E-07	5.59E-05	7.98E-06	3.79E-05	2	2	GRP,NMB
Domain	IPR000874	Bombesin	InterPro	8.73E-07	5.59E-05	7.98E-06	3.79E-05	2	2	GRP,NMB
Domain	PS00267	TACHYKININ	PROSITE	2.61E-06	1.67E-04	1.86E-05	8.82E-05	2	3	TAC1,TAC3
Domain	IPR013055	Tachy_Neuro_lke_CS	InterPro	2.61E-06	1.67E-04	1.86E-05	8.82E-05	2	3	TAC1,TAC3
Domain	SM00070	GLUCA	SMART	1.31E-05	8.35E-04	6.42E-05	3.05E-04	2	6	VIP,ADCYAP1
Domain	PS00260	GLUCAGON	PROSITE	1.31E-05	8.35E-04	6.42E-05	3.05E-04	2	6	VIP,ADCYAP1
Domain	IPR000532	Glucagon_GIP_secretin_VIP	InterPro	1.31E-05	8.35E-04	6.42E-05	3.05E-04	2	6	VIP,ADCYAP1
Domain	PF00123	Hormone_2	Pfam	1.31E-05	8.35E-04	6.42E-05	3.05E-04	2	6	VIP,ADCYAP1
Domain	PF03823	Neurokinin_B	Pfam	9.62E-04	6.16E-02	2.28E-03	1.08E-02	1	1	TAC3
Domain	IPR008215	Tachykinin_dom	InterPro	9.62E-04	6.16E-02	2.28E-03	1.08E-02	1	1	TAC1
Domain	IPR003635	Neurokinin-B/TAC3	InterPro	9.62E-04	6.16E-02	2.28E-03	1.08E-02	1	1	TAC3
Domain	SM00203	TK	SMART	9.62E-04	6.16E-02	2.28E-03	1.08E-02	1	1	TAC1
Domain	IPR008857	TRH	InterPro	9.62E-04	6.16E-02	2.28E-03	1.08E-02	1	1	TRH
Domain	PF05438	TRH	Pfam	9.62E-04	6.16E-02	2.28E-03	1.08E-02	1	1	TRH
Domain	IPR008055	NeurotensiN	InterPro	9.62E-04	6.16E-02	2.28E-03	1.08E-02	1	1	NTS
Domain	IPR000703	Proenkphlin_A	InterPro	9.62E-04	6.16E-02	2.28E-03	1.08E-02	1	1	PENK
Domain	IPR000750	Proenkphlin_B	InterPro	9.62E-04	6.16E-02	2.28E-03	1.08E-02	1	1	PDYN
Domain	IPR015499	CCK-like	InterPro	9.62E-04	6.16E-02	2.28E-03	1.08E-02	1	1	CCK
Domain	IPR002367	Nociceptin	InterPro	9.62E-04	6.16E-02	2.28E-03	1.08E-02	1	1	PNOC
Domain	IPR015523	VIP	InterPro	9.62E-04	6.16E-02	2.28E-03	1.08E-02	1	1	VIP
Domain	PD016590	NeurotensiN	ProDom	9.62E-04	6.16E-02	2.28E-03	1.08E-02	1	1	NTS
Domain	PF07421	Pro-NT_NN	Pfam	9.62E-04	6.16E-02	2.28E-03	1.08E-02	1	1	NTS
Domain	IPR004250	Somatostatin	InterPro	1.92E-03	1.23E-01	2.86E-03	1.36E-02	1	2	CORT
Domain	IPR001651	Gastrin	InterPro	1.92E-03	1.23E-01	2.86E-03	1.36E-02	1	2	CCK
Domain	PF03002	Somatostatin	Pfam	1.92E-03	1.23E-01	2.86E-03	1.36E-02	1	2	CORT
Domain	PS00259	GASTRIN	PROSITE	1.92E-03	1.23E-01	2.86E-03	1.36E-02	1	2	CCK
Domain	IPR001415	PTH/PTH-rel	InterPro	1.92E-03	1.23E-01	2.86E-03	1.36E-02	1	2	PTHLH
Domain	IPR018142	Somatostatin/Cortistatin_C	InterPro	1.92E-03	1.23E-01	2.86E-03	1.36E-02	1	2	CORT
Domain	IPR013152	Gastrin/cholecystokinin_CS	InterPro	1.92E-03	1.23E-01	2.86E-03	1.36E-02	1	2	CCK
Domain	PF00918	Gastrin	Pfam	1.92E-03	1.23E-01	2.86E-03	1.36E-02	1	2	CCK
Domain	IPR008216	Tachykinin_fam	InterPro	1.92E-03	1.23E-01	2.86E-03	1.36E-02	1	2	TAC1
Domain	SM00087	PTH	SMART	1.92E-03	1.23E-01	2.86E-03	1.36E-02	1	2	PTHLH
Domain	IPR003626	PTH-rel	InterPro	1.92E-03	1.23E-01	2.86E-03	1.36E-02	1	2	PTHLH
Domain	PF01279	Parathyroid	Pfam	1.92E-03	1.23E-01	2.86E-03	1.36E-02	1	2	PTHLH
Domain	IPR003620	Urocortin_CRF	InterPro	1.92E-03	1.23E-01	2.86E-03	1.36E-02	1	2	CRH
Domain	PS00511	CRF	PROSITE	1.92E-03	1.23E-01	2.86E-03	1.36E-02	1	2	CRH
Domain	IPR018446	Corticotropin-releasing_fac_CS	InterPro	1.92E-03	1.23E-01	2.86E-03	1.36E-02	1	2	CRH
Domain	PS00335	PARATHYROID	PROSITE	1.92E-03	1.23E-01	2.86E-03	1.36E-02	1	2	PTHLH
Domain	SM00039	CRF	SMART	2.88E-03	1.84E-01	3.54E-03	1.68E-02	1	3	CRH
Domain	SM00309	PAH	SMART	2.88E-03	1.84E-01	3.54E-03	1.68E-02	1	3	NPY
Domain	PD001267	Pancreatic_hormone-like	ProDom	2.88E-03	1.84E-01	3.54E-03	1.68E-02	1	3	NPY
Domain	PF00159	Hormone_3	Pfam	2.88E-03	1.84E-01	3.54E-03	1.68E-02	1	3	NPY
Domain	IPR022421	Relaxin	InterPro	2.88E-03	1.84E-01	3.54E-03	1.68E-02	1	3	RLN1
Domain	IPR001955	Pancreatic_hormone-like	InterPro	2.88E-03	1.84E-01	3.54E-03	1.68E-02	1	3	NPY
Domain	IPR020392	Pancreatic_hormone-like_CS	InterPro	2.88E-03	1.84E-01	3.54E-03	1.68E-02	1	3	NPY
Domain	PS50276	PANCREATIC_HORMONE_2	PROSITE	2.88E-03	1.84E-01	3.54E-03	1.68E-02	1	3	NPY
Domain	PS00265	PANCREATIC_HORMONE_1	PROSITE	2.88E-03	1.84E-01	3.54E-03	1.68E-02	1	3	NPY
Domain	PF00473	CRF	Pfam	3.84E-03	2.46E-01	4.55E-03	2.16E-02	1	4	CRH
Domain	IPR000187	CRF	InterPro	3.84E-03	2.46E-01	4.55E-03	2.16E-02	1	4	CRH
Domain	IPR022352	Insulin_family	InterPro	5.75E-03	3.68E-01	6.69E-03	3.18E-02	1	6	RLN1
Domain	1.10.100.10	-	Gene3D	8.62E-03	5.51E-01	9.67E-03	4.59E-02	1	9	RLN1
Domain	IPR022353	Insulin_CS	InterPro	8.62E-03	5.51E-01	9.67E-03	4.59E-02	1	9	RLN1
Domain	PS00262	INSULIN	PROSITE	9.57E-03	6.12E-01	1.04E-02	4.92E-02	1	10	RLN1
Domain	PF00049	Insulin	Pfam	9.57E-03	6.12E-01	1.04E-02	4.92E-02	1	10	RLN1
Domain	IPR016179	Insulin-like	InterPro	1.05E-02	6.73E-01	1.09E-02	5.15E-02	1	11	RLN1
Domain	SM00078	IlGF	SMART	1.05E-02	6.73E-01	1.09E-02	5.15E-02	1	11	RLN1
Domain	IPR004825	Insulin	InterPro	1.05E-02	6.73E-01	1.09E-02	5.15E-02	1	11	RLN1
Domain	IPR002164	NAP_family	InterPro	1.62E-02	1.00E+00	1.62E-02	7.69E-02	1	17	SET
Domain	PF00956	NAP	Pfam	1.62E-02	1.00E+00	1.62E-02	7.69E-02	1	17	SET
Pathway	1269544	GPCR ligand binding	BioSystems: REACTOME	2.81E-20	1.44E-18	1.44E-18	6.48E-18	15	455	TRH,GRP,CORT,TAC1,CRH,PTHLH,TAC3,NPY,ADCYAP1,CCK,PDYN,PNOC,NTS,PENK,NMB
Pathway	1269546	Peptide ligand-binding receptors	BioSystems: REACTOME	5.72E-19	2.92E-17	1.46E-17	6.59E-17	12	188	TRH,GRP,CORT,TAC1,TAC3,NPY,CCK,PDYN,PNOC,NTS,PENK,NMB
Pathway	1269574	GPCR downstream signaling	BioSystems: REACTOME	5.90E-17	3.01E-15	1.00E-15	4.53E-15	16	1021	TRH,VIP,GRP,CORT,TAC1,CRH,PTHLH,TAC3,NPY,ADCYAP1,CCK,PDYN,PNOC,NTS,PENK,NMB
Pathway	1269545	Class A/1 (Rhodopsin-like receptors)	BioSystems: REACTOME	4.03E-16	2.06E-14	5.14E-15	2.32E-14	12	322	TRH,GRP,CORT,TAC1,TAC3,NPY,CCK,PDYN,PNOC,NTS,PENK,NMB
Pathway	1269543	Signaling by GPCR	BioSystems: REACTOME	5.16E-15	2.63E-13	5.26E-14	2.38E-13	16	1350	TRH,VIP,GRP,CORT,TAC1,CRH,PTHLH,TAC3,NPY,ADCYAP1,CCK,PDYN,PNOC,NTS,PENK,NMB
Pathway	1269578	G alpha (q) signalling events	BioSystems: REACTOME	3.17E-09	1.62E-07	2.70E-08	1.22E-07	7	192	TRH,GRP,TAC1,TAC3,CCK,NTS,NMB
Pathway	1269592	Gastrin-CREB signalling pathway via PKC and MAPK	BioSystems: REACTOME	1.03E-06	5.25E-05	7.50E-06	3.39E-05	7	446	TRH,GRP,TAC1,TAC3,CCK,NTS,NMB
Pathway	1269576	G alpha (i) signalling events	BioSystems: REACTOME	1.39E-05	7.08E-04	8.85E-05	4.00E-04	5	243	CORT,NPY,PDYN,PNOC,PENK
Pathway	1269548	Tachykinin receptors bind tachykinins	BioSystems: REACTOME	1.75E-05	8.93E-04	9.92E-05	4.48E-04	2	5	TAC1,TAC3
Pathway	1269575	G alpha (s) signalling events	BioSystems: REACTOME	3.84E-05	1.96E-03	1.96E-04	8.84E-04	4	146	VIP,CRH,PTHLH,ADCYAP1
Pathway	1269570	Class B/2 (Secretin family receptors)	BioSystems: REACTOME	2.54E-04	1.30E-02	1.18E-03	5.33E-03	3	93	CRH,PTHLH,ADCYAP1
Pathway	P05915	Opioid proenkephalin pathway	PantherDB	8.50E-04	4.33E-02	3.55E-03	1.60E-02	2	32	PDYN,PENK
Pathway	P05913	Enkephalin release	PantherDB	9.04E-04	4.61E-02	3.55E-03	1.60E-02	2	33	PDYN,PENK
Pathway	PW:0000448	neuropeptide Y metabolic	Pathway Ontology	1.37E-03	6.97E-02	4.98E-03	2.25E-02	1	1	NPY
Pathway	585563	Alcoholism	BioSystems: KEGG	1.74E-03	8.88E-02	5.92E-03	2.67E-02	3	180	CRH,NPY,PDYN
Pathway	PW:0000493	corticotropin-releasing hormone signaling	Pathway Ontology	4.09E-03	2.09E-01	1.30E-02	5.89E-02	1	3	CRH
Pathway	1269463	NGF-independant TRKA activation	BioSystems: REACTOME	6.81E-03	3.47E-01	2.04E-02	9.23E-02	1	5	ADCYAP1
Pathway	1269461	Activation of TRKA receptors	BioSystems: REACTOME	8.17E-03	4.17E-01	2.31E-02	1.05E-01	1	6	ADCYAP1
Pathway	137923	Rapid glucocorticoid signaling	BioSystems: Pathway Interaction Database	9.52E-03	4.86E-01	2.56E-02	1.16E-01	1	7	CRH
Pathway	1269730	HuR (ELAVL1) binds and stabilizes mRNA	BioSystems: REACTOME	1.09E-02	5.55E-01	2.77E-02	1.25E-01	1	8	SET
Pathway	M3075	Granzyme A mediated Apoptosis Pathway	MSigDB C2 BIOCARTA (v6.0)	1.49E-02	7.61E-01	3.62E-02	1.64E-01	1	11	SET
Pathway	PW:0000363	leptin system	Pathway Ontology	1.63E-02	8.30E-01	3.77E-02	1.70E-01	1	12	NPY
Pubmed	19086053	Identification of new putative susceptibility genes for several psychiatric disorders by association analysis of regulatory and non-synonymous SNPs of 306 genes involved in neurotransmission and neurodevelopment.	Pubmed	3.08E-24	1.28E-20	1.28E-20	1.14E-19	13	301	TRH,VIP,GRP,CORT,TAC1,CRH,TAC3,NPY,ADCYAP1,CCK,PDYN,NTS,PENK
Pubmed	18721803	A transcriptional network coordinately determines transmitter and peptidergic fate in the dorsal spinal cord.	Pubmed	8.24E-23	3.41E-19	1.71E-19	1.52E-18	8	21	GRP,TAC1,NPY,ADCYAP1,CCK,PDYN,PNOC,PENK
Pubmed	25071457	Anatomical characterization of Cre driver mice for neural circuit mapping and manipulation.	Pubmed	1.05E-19	4.35E-16	1.20E-16	1.07E-15	8	46	VIP,CORT,TAC1,CRH,TAC3,ADCYAP1,CCK,PENK
Pubmed	24952961	A high-resolution spatiotemporal atlas of gene expression of the developing mouse brain.	Pubmed	1.16E-19	4.79E-16	1.20E-16	1.07E-15	16	1836	TRH,VIP,GRP,CORT,TAC1,CRH,PTHLH,TAC3,NPY,ADCYAP1,CCK,PDYN,PNOC,NTS,PENK,NMB
Pubmed	11278902	Marked differences between metalloproteases meprin A and B in substrate and peptide bond specificity.	Pubmed	8.22E-17	3.40E-13	6.80E-14	6.06E-13	6	18	VIP,GRP,TAC1,NPY,CCK,NTS
Pubmed	28228269	Diverse Central Projection Patterns of Retinal Ganglion Cells.	Pubmed	4.88E-15	2.02E-11	3.37E-12	3.00E-11	6	33	VIP,CORT,CRH,TAC3,ADCYAP1,CCK
Pubmed	20468064	Association study of 182 candidate genes in anorexia nervosa.	Pubmed	9.96E-15	4.12E-11	5.89E-12	5.25E-11	8	182	TRH,GRP,TAC1,CRH,NPY,ADCYAP1,CCK,NTS
Pubmed	18400903	Tlx1 and Tlx3 coordinate specification of dorsal horn pain-modulatory peptidergic neurons.	Pubmed	2.59E-14	1.07E-10	1.23E-11	1.10E-10	5	14	TAC1,TAC3,CCK,PDYN,PENK
Pubmed	23597562	Inhibition of tumor angiogenesis and growth by a small-molecule multi-FGF receptor blocker with allosteric properties.	Pubmed	2.68E-14	1.11E-10	1.23E-11	1.10E-10	6	43	VIP,TAC1,TAC3,CCK,NTS,PENK
Pubmed	19874574	Genetical genomic determinants of alcohol consumption in rats and humans.	Pubmed	1.44E-13	5.95E-10	5.95E-11	5.29E-10	7	130	TAC1,CRH,NPY,CCK,PDYN,PNOC,PENK
Pubmed	17175032	The neuropeptide genes TAC1, TAC3, TAC4, VIP and PACAP(ADCYAP1), and susceptibility to multiple sclerosis.	Pubmed	1.76E-13	7.29E-10	6.63E-11	5.90E-10	4	5	VIP,TAC1,TAC3,ADCYAP1
Pubmed	16987237	Reduced expression of neuropeptide genes in a genome-wide screen of a secretion-deficient mouse.	Pubmed	3.97E-13	1.64E-09	1.37E-10	1.22E-09	6	66	TAC1,NPY,CCK,PDYN,NTS,PENK
Pubmed	27452460	The Zinc Finger Transcription Factor Sp9 Is Required for the Development of Striatopallidal Projection Neurons.	Pubmed	4.35E-13	1.80E-09	1.38E-10	1.23E-09	5	23	VIP,TAC1,NPY,PDYN,PENK
Pubmed	20080794	Excitatory neurons of the proprioceptive, interoceptive, and arousal hindbrain networks share a developmental requirement for Math1.	Pubmed	8.49E-13	3.51E-09	2.51E-10	2.23E-09	5	26	TRH,TAC1,CRH,NPY,PENK
Pubmed	28514446	Identification of preoptic sleep neurons using retrograde labelling and gene profiling.	Pubmed	1.23E-12	5.10E-09	3.40E-10	3.03E-09	4	7	TAC1,CRH,CCK,PDYN
Pubmed	18577758	Dissociation of heterotrimeric g proteins in cells.	Pubmed	1.39E-12	5.77E-09	3.60E-10	3.21E-09	7	179	TRH,TAC1,TAC3,NPY,CCK,NTS,PENK
Pubmed	21491433	Cell-type-specific consequences of Reelin deficiency in the mouse neocortex, hippocampus, and amygdala.	Pubmed	1.64E-12	6.80E-09	4.00E-10	3.56E-09	6	83	VIP,GRP,TAC3,ADCYAP1,PDYN,NTS
Pubmed	30038273	Parallel circuits from the bed nuclei of stria terminalis to the lateral hypothalamus drive opposing emotional states.	Pubmed	2.46E-12	1.02E-08	5.37E-10	4.78E-09	4	8	TAC1,CRH,CCK,PDYN
Pubmed	24487620	An excitatory paraventricular nucleus to AgRP neuron circuit that drives hunger.	Pubmed	2.46E-12	1.02E-08	5.37E-10	4.78E-09	4	8	TRH,CRH,ADCYAP1,PDYN
Pubmed	16754659	Stable association between G alpha(q) and phospholipase C beta 1 in living cells.	Pubmed	3.77E-12	1.56E-08	7.80E-10	6.94E-09	6	95	TRH,GRP,TAC1,TAC3,CCK,NTS
Pubmed	21943598	A resource of Cre driver lines for genetic targeting of GABAergic neurons in cerebral cortex.	Pubmed	3.52E-11	1.46E-07	6.93E-09	6.17E-08	4	14	VIP,CORT,CRH,CCK
Pubmed	18634777	Ptf1a, Lbx1 and Pax2 coordinate glycinergic and peptidergic transmitter phenotypes in dorsal spinal inhibitory neurons.	Pubmed	4.79E-11	1.98E-07	9.02E-09	8.03E-08	4	15	NPY,PDYN,PNOC,PENK
Pubmed	20675276	Changes in vasoactive intestinal peptide, pituitary adenylate cyclase-activating polypeptide and neuropeptide Y-ergic structures of the enteric nervous system in the carcinoma of the human large intestine.	Pubmed	8.93E-11	3.69E-07	1.61E-08	1.43E-07	3	3	VIP,NPY,ADCYAP1
Pubmed	24154525	Conserved molecular signatures of neurogenesis in the hippocampal subgranular zone of rodents and primates.	Pubmed	1.49E-10	6.15E-07	2.56E-08	2.28E-07	7	348	VIP,CORT,TAC1,PTHLH,TAC3,NPY,PNOC
Pubmed	18240029	Reviews in molecular biology and biotechnology: transmembrane signaling by G protein-coupled receptors.	Pubmed	3.47E-10	1.44E-06	5.27E-08	4.70E-07	6	200	VIP,GRP,CRH,PTHLH,PDYN,PENK
Pubmed	12746872	Patterns of expression of neuropeptides in GABAergic nonprincipal neurons in the mouse hippocampus: Quantitative analysis with optical disector.	Pubmed	3.57E-10	1.48E-06	5.27E-08	4.70E-07	3	4	VIP,NPY,CCK
Pubmed	28334609	Basolateral to Central Amygdala Neural Circuits for Appetitive Behaviors.	Pubmed	3.57E-10	1.48E-06	5.27E-08	4.70E-07	3	4	CRH,TAC3,NTS
Pubmed	18603306	Antimicrobial activity of neuropeptides against a range of micro-organisms from skin, oral, respiratory and gastrointestinal tract sites.	Pubmed	3.57E-10	1.48E-06	5.27E-08	4.70E-07	3	4	VIP,TAC1,NPY
Pubmed	26743624	Pulmonary neuroendocrine cells function as airway sensors to control lung immune response.	Pubmed	2.30E-09	9.54E-06	3.29E-07	2.93E-06	4	37	GRP,TAC1,CCK,PENK
Pubmed	17448763	Application of HapMap data to the evaluation of 8 candidate genes for pediatric slow transit constipation.	Pubmed	4.99E-09	2.07E-05	6.26E-07	5.57E-06	3	8	VIP,TAC1,TAC3
Pubmed	30449655	A Brainstem-Spinal Circuit Controlling Nocifensive Behavior.	Pubmed	4.99E-09	2.07E-05	6.26E-07	5.57E-06	3	8	TAC1,PDYN,NTS
Pubmed	10998124	Dopamine control of striatal gene expression during development: relevance to knockout mice for the dopamine transporter.	Pubmed	4.99E-09	2.07E-05	6.26E-07	5.57E-06	3	8	TAC1,PDYN,PENK
Pubmed	10920050	Developmental history of the subplate and developing white matter in the murine neocortex. Neuronal organization and relationship with the main afferent systems at embryonic and perinatal stages.	Pubmed	4.99E-09	2.07E-05	6.26E-07	5.57E-06	3	8	VIP,NPY,CCK
Pubmed	24899708	Genetically targeted binary labeling of retinal neurons.	Pubmed	7.48E-09	3.10E-05	8.85E-07	7.88E-06	3	9	VIP,CRH,CCK
Pubmed	14598259	Genetic background modifies intestinal pseudo-obstruction and the expression of a reporter gene in Hox11L1-/- mice.	Pubmed	7.48E-09	3.10E-05	8.85E-07	7.88E-06	3	9	VIP,TAC1,NPY
Pubmed	9742148	Regional and cellular patterns of reelin mRNA expression in the forebrain of the developing and adult mouse.	Pubmed	1.47E-08	6.08E-05	1.64E-06	1.46E-05	3	11	VIP,NPY,CCK
Pubmed	21205893	TrkB receptor controls striatal formation by regulating the number of newborn striatal neurons.	Pubmed	1.47E-08	6.08E-05	1.64E-06	1.46E-05	3	11	TAC1,NPY,PENK
Pubmed	23142661	Maturation-promoting activity of SATB1 in MGE-derived cortical interneurons.	Pubmed	2.55E-08	1.05E-04	2.77E-06	2.47E-05	3	13	VIP,CRH,NPY
Pubmed	21989918	Targeted deletion of Hand2 in enteric neural precursor cells affects its functions in neurogenesis, neurotransmitter specification and gangliogenesis, causing functional aganglionosis.	Pubmed	4.05E-08	1.67E-04	4.29E-06	3.82E-05	3	15	VIP,TAC1,NPY
Pubmed	15217369	The LIM homeobox gene, L3/Lhx8, is necessary for proper development of basal forebrain cholinergic neurons.	Pubmed	7.25E-08	3.00E-04	6.98E-06	6.21E-05	3	18	TAC1,NPY,PENK
Pubmed	20180986	CLOCK is suggested to associate with comorbid alcohol use and depressive disorders.	Pubmed	7.25E-08	3.00E-04	6.98E-06	6.21E-05	3	18	VIP,NPY,ADCYAP1
Pubmed	26511239	Retinoic Acid Receptor ? Controls Development of Striatonigral Projection Neurons through FGF-Dependent and Meis1-Dependent Mechanisms.	Pubmed	7.25E-08	3.00E-04	6.98E-06	6.21E-05	3	18	TAC1,PDYN,PENK
Pubmed	24082127	The LIM homeobox gene Isl1 is required for the correct development of the striatonigral pathway in the mouse.	Pubmed	7.25E-08	3.00E-04	6.98E-06	6.21E-05	3	18	TAC1,NPY,PENK
Pubmed	20554694	Circadian clock gene polymorphisms in alcohol use disorders and alcohol consumption.	Pubmed	8.61E-08	3.56E-04	8.10E-06	7.21E-05	3	19	VIP,NPY,ADCYAP1
Pubmed	24351932	Dual role for Islet-1 in promoting striatonigral and repressing striatopallidal genetic programs to specify striatonigral cell identity.	Pubmed	1.57E-07	6.50E-04	1.02E-05	9.09E-05	3	23	TAC1,PDYN,PENK
Pubmed	27578785	The LIM-homeobox transcription factor Isl1 plays crucial roles in the development of multiple arcuate nucleus neurons.	Pubmed	1.80E-07	7.43E-04	1.02E-05	9.09E-05	3	24	TRH,CRH,NPY
Pubmed	28706241	Abnormal Paraventricular Nucleus of Hypothalamus and Growth Retardation Associated with Loss of Nuclear Receptor Gene COUP-TFII.	Pubmed	2.04E-07	8.44E-04	1.02E-05	9.09E-05	3	25	TRH,CRH,NPY
Pubmed	15899028	Levels of gastrin-releasing peptide and substance P in synovial fluid and serum correlate with levels of cytokines in rheumatoid arthritis.	Pubmed	2.12E-07	8.77E-04	1.02E-05	9.09E-05	2	2	GRP,TAC1
Pubmed	21157320	VIP and PACAP: recent insights into their functions/roles in physiology and disease from molecular and genetic studies.	Pubmed	2.12E-07	8.77E-04	1.02E-05	9.09E-05	2	2	VIP,ADCYAP1
Pubmed	25589759	Primary afferent and spinal cord expression of gastrin-releasing peptide: message, protein, and antibody concerns.	Pubmed	2.12E-07	8.77E-04	1.02E-05	9.09E-05	2	2	GRP,TAC1
Pubmed	23220033	Ameliorative effect of PACAP and VIP against increased permeability in a model of outer blood retinal barrier dysfunction.	Pubmed	2.12E-07	8.77E-04	1.02E-05	9.09E-05	2	2	VIP,ADCYAP1
Pubmed	22531916	Pituitary adenylate cyclase-activating peptide and vasoactive intestinal polypeptide bias Langerhans cell Ag presentation toward Th17 cells.	Pubmed	2.12E-07	8.77E-04	1.02E-05	9.09E-05	2	2	VIP,ADCYAP1
Pubmed	29775595	The Neuropeptide Tac2 Controls a Distributed Brain State Induced by Chronic Social Isolation Stress.	Pubmed	2.12E-07	8.77E-04	1.02E-05	9.09E-05	2	2	TAC1,TAC3
Pubmed	11713978	Gut/brain peptides in the genital tract: VIP and PACAP.	Pubmed	2.12E-07	8.77E-04	1.02E-05	9.09E-05	2	2	VIP,ADCYAP1
Pubmed	15009127	VIP and PACAP induce selective neuronal differentiation of mouse embryonic stem cells.	Pubmed	2.12E-07	8.77E-04	1.02E-05	9.09E-05	2	2	VIP,ADCYAP1
Pubmed	15567470	Neuropeptide Y immunoreactivity and corticotropin-releasing hormone mRNA level are increased in the hypothalamus of mouse bearing a human oral squamous cell carcinoma.	Pubmed	2.12E-07	8.77E-04	1.02E-05	9.09E-05	2	2	CRH,NPY
Pubmed	18491042	Mice deficient in both pituitary adenylyl cyclase-activating polypeptide and vasoactive intestinal peptide survive, but display growth retardation and sex-dependent early death.	Pubmed	2.12E-07	8.77E-04	1.02E-05	9.09E-05	2	2	VIP,ADCYAP1
Pubmed	20692311	Substance P (SP) and vasoactive intestinal polypeptide (VIP) in the lower uterine segment in first and repeated cesarean sections.	Pubmed	2.12E-07	8.77E-04	1.02E-05	9.09E-05	2	2	VIP,TAC1
Pubmed	28490016	Backup Mechanisms Maintain PACAP/VIP-Induced Arterial Relaxations in Pituitary Adenylate Cyclase-Activating Polypeptide-Deficient Mice.	Pubmed	2.12E-07	8.77E-04	1.02E-05	9.09E-05	2	2	VIP,ADCYAP1
Pubmed	12090758	Vasoactive intestinal peptide and pituitary adenylate cyclase-activating polypeptide inhibit LPS-stimulated MIP-1alpha production and mRNA expression.	Pubmed	2.12E-07	8.77E-04	1.02E-05	9.09E-05	2	2	VIP,ADCYAP1
Pubmed	6281660	Isolation and structural organization of the human preproenkephalin gene.	Pubmed	2.12E-07	8.77E-04	1.02E-05	9.09E-05	2	2	PDYN,PENK
Pubmed	11932939	Corticotropin-releasing hormone-synthesizing neurons of the human hypothalamus receive neuropeptide Y-immunoreactive innervation from neurons residing primarily outside the infundibular nucleus.	Pubmed	2.12E-07	8.77E-04	1.02E-05	9.09E-05	2	2	CRH,NPY
Pubmed	12525573	Vasoactive intestinal peptide and pituitary adenylate cyclase-activating polypeptide inhibit the production of inflammatory mediators by activated microglia.	Pubmed	2.12E-07	8.77E-04	1.02E-05	9.09E-05	2	2	VIP,ADCYAP1
Pubmed	20180841	The role of the neuropeptides PACAP and VIP in the photic regulation of gene expression in the suprachiasmatic nucleus.	Pubmed	2.12E-07	8.77E-04	1.02E-05	9.09E-05	2	2	VIP,ADCYAP1
Pubmed	16439015	Distribution of prodynorphin mRNA and its interaction with the NPY system in the mouse brain.	Pubmed	2.12E-07	8.77E-04	1.02E-05	9.09E-05	2	2	NPY,PDYN
Pubmed	23517078	VIP and PACAP: neuropeptide modulators of CNS inflammation, injury, and repair.	Pubmed	2.12E-07	8.77E-04	1.02E-05	9.09E-05	2	2	VIP,ADCYAP1
Pubmed	26818776	VIP and CRF reduce ADAMTS expression and function in osteoarthritis synovial fibroblasts.	Pubmed	2.12E-07	8.77E-04	1.02E-05	9.09E-05	2	2	VIP,CRH
Pubmed	19712974	Signaling pathways in PACAP regulation of VIP gene expression in human neuroblastoma cells.	Pubmed	2.12E-07	8.77E-04	1.02E-05	9.09E-05	2	2	VIP,ADCYAP1
Pubmed	22108610	Distribution of vasoactive intestinal peptide, pituitary adenylate cyclase-activating peptide, nitric oxide synthase, and their receptors in human and rat sphenopalatine ganglion.	Pubmed	2.12E-07	8.77E-04	1.02E-05	9.09E-05	2	2	VIP,ADCYAP1
Pubmed	20207019	Midregional Proenkephalin A and N-terminal Protachykinin A are decreased in the cerebrospinal fluid of patients with dementia disorders and acute neuroinflammation.	Pubmed	2.12E-07	8.77E-04	1.02E-05	9.09E-05	2	2	TAC1,PENK
Pubmed	7759618	Opioid precursor gene expression in the human hypothalamus.	Pubmed	2.12E-07	8.77E-04	1.02E-05	9.09E-05	2	2	PDYN,PENK
Pubmed	9603988	VIP induces the translocation and degradation of the alpha subunit of Gs protein in rat pituitary GH4C1 cells.	Pubmed	2.12E-07	8.77E-04	1.02E-05	9.09E-05	2	2	VIP,ADCYAP1
Pubmed	23864142	Levels of dipeptidyl peptidase IV/CD26 substrates neuropeptide Y and vasoactive intestinal peptide in rheumatoid arthritis patients.	Pubmed	2.12E-07	8.77E-04	1.02E-05	9.09E-05	2	2	VIP,NPY
Pubmed	21167238	Distribution of substance P (SP) and vasoactive intestinal peptide (VIP) in pseudocapsules of uterine fibroids.	Pubmed	2.12E-07	8.77E-04	1.02E-05	9.09E-05	2	2	VIP,TAC1
Pubmed	2893547	Chromosomal localization of the human proenkephalin and prodynorphin genes.	Pubmed	2.12E-07	8.77E-04	1.02E-05	9.09E-05	2	2	PDYN,PENK
Pubmed	16697281	Endogenous ligands of PACAP/VIP receptors in the autocrine-paracrine regulation of the adrenal gland.	Pubmed	2.12E-07	8.77E-04	1.02E-05	9.09E-05	2	2	VIP,ADCYAP1
Pubmed	24680736	Double deletion of orexigenic neuropeptide Y and dynorphin results in paradoxical obesity in mice.	Pubmed	2.12E-07	8.77E-04	1.02E-05	9.09E-05	2	2	NPY,PDYN
Pubmed	29699729	PACAP and VIP regulate hypoxia-inducible factors in neuroblastoma cells exposed to hypoxia.	Pubmed	2.12E-07	8.77E-04	1.02E-05	9.09E-05	2	2	VIP,ADCYAP1
Pubmed	17029602	Noncompensation in peptide/receptor gene expression and distinct behavioral phenotypes in VIP- and PACAP-deficient mice.	Pubmed	2.12E-07	8.77E-04	1.02E-05	9.09E-05	2	2	VIP,ADCYAP1
Pubmed	15655834	Effects of psychological stress on small intestinal motility and expression of cholecystokinin and vasoactive intestinal polypeptide in plasma and small intestine in mice.	Pubmed	2.12E-07	8.77E-04	1.02E-05	9.09E-05	2	2	VIP,CCK
Pubmed	20529207	Substance P and vasoactive intestinal peptide are reduced in right transverse colon in pediatric slow-transit constipation.	Pubmed	2.12E-07	8.77E-04	1.02E-05	9.09E-05	2	2	VIP,TAC1
Pubmed	22776446	The majority of dorsal spinal cord gastrin releasing peptide is synthesized locally whereas neuromedin B is highly expressed in pain- and itch-sensing somatosensory neurons.	Pubmed	2.12E-07	8.77E-04	1.02E-05	9.09E-05	2	2	GRP,NMB
Pubmed	16292577	Roles of PACAP and PHI as inhibitory neurotransmitters in the circular muscle of mouse antrum.	Pubmed	2.12E-07	8.77E-04	1.02E-05	9.09E-05	2	2	VIP,ADCYAP1
Pubmed	24041830	Vasoactive intestinal peptide (VIP) and pituitary adenylate cyclase activating polypeptide (PACAP) in humans with multiple sclerosis.	Pubmed	2.12E-07	8.77E-04	1.02E-05	9.09E-05	2	2	VIP,ADCYAP1
Pubmed	30248304	Neurotensin and dynorphin Bi-Directionally modulate CeA inhibition of oval BNST neurons in male mice.	Pubmed	2.12E-07	8.77E-04	1.02E-05	9.09E-05	2	2	PDYN,NTS
Pubmed	19997907	Forebrain PENK and PDYN gene expression levels in three inbred strains of mice and their relationship to genotype-dependent morphine reward sensitivity.	Pubmed	2.12E-07	8.77E-04	1.02E-05	9.09E-05	2	2	PDYN,PENK
Pubmed	16951258	The zinc-finger factor Insm1 (IA-1) is essential for the development of pancreatic beta cells and intestinal endocrine cells.	Pubmed	2.90E-07	1.20E-03	1.38E-05	1.23E-04	3	28	TAC1,CCK,NTS
Pubmed	11884208	Circulating levels of neuropeptides (CGRP, VIP, NPY) in patients with fulminant hepatic failure.	Pubmed	6.36E-07	2.63E-03	2.23E-05	1.99E-04	2	3	VIP,NPY
Pubmed	18280051	Control of hormonal stress reactivity by the endogenous opioid system.	Pubmed	6.36E-07	2.63E-03	2.23E-05	1.99E-04	2	3	PDYN,PENK
Pubmed	23977290	Substance P immunoreactivity exhibits frequent colocalization with kisspeptin and neurokinin B in the human infundibular region.	Pubmed	6.36E-07	2.63E-03	2.23E-05	1.99E-04	2	3	TAC1,TAC3
Pubmed	8861630	Increased preproenkephalin mRNA and preprotachykinin mRNA in the striatum of Rolling mouse Nagoya.	Pubmed	6.36E-07	2.63E-03	2.23E-05	1.99E-04	2	3	TAC1,PENK
Pubmed	24289328	Aberrant methylation of NPY, PENK, and WIF1 as a promising marker for blood-based diagnosis of colorectal cancer.	Pubmed	6.36E-07	2.63E-03	2.23E-05	1.99E-04	2	3	NPY,PENK
Pubmed	17087112	[The roles of three peptides in the pathogenesis of vasomotor rhinitis].	Pubmed	6.36E-07	2.63E-03	2.23E-05	1.99E-04	2	3	VIP,TAC1
Pubmed	18211417	The role of selected neuropeptides in pathogenesis of atopic dermatitis.	Pubmed	6.36E-07	2.63E-03	2.23E-05	1.99E-04	2	3	TAC1,NPY
Pubmed	9313778	Vasoactive intestinal peptide (VIP) and pituitary adenylate cyclase-activating peptide (PACAP-27, but not PACAP-38) degradation by the neutral endopeptidase EC 3.4.24.11.	Pubmed	6.36E-07	2.63E-03	2.23E-05	1.99E-04	2	3	VIP,ADCYAP1
Pubmed	22849656	NT, NPY and PGP 9.5 presence in myomeytrium and in fibroid pseudocapsule and their possible impact on muscular physiology.	Pubmed	6.36E-07	2.63E-03	2.23E-05	1.99E-04	2	3	NPY,NTS
Pubmed	8146174	Cloning and functional characterization of a third pituitary adenylate cyclase-activating polypeptide receptor subtype expressed in insulin-secreting cells.	Pubmed	6.36E-07	2.63E-03	2.23E-05	1.99E-04	2	3	VIP,ADCYAP1
Pubmed	2011497	Molecular cloning of the mouse CCK gene: expression in different brain regions and during cortical development.	Pubmed	6.36E-07	2.63E-03	2.23E-05	1.99E-04	2	3	CCK,PENK
Pubmed	12754213	Inhibition of interferon (IFN) gamma-induced Jak-STAT1 activation in microglia by vasoactive intestinal peptide: inhibitory effect on CD40, IFN-induced protein-10, and inducible nitric-oxide synthase expression.	Pubmed	6.36E-07	2.63E-03	2.23E-05	1.99E-04	2	3	VIP,ADCYAP1
Pubmed	17038558	Severity of the catabolic condition differentially modulates hypothalamic expression of growth hormone-releasing hormone in the fasted mouse: potential role of neuropeptide Y and corticotropin-releasing hormone.	Pubmed	6.36E-07	2.63E-03	2.23E-05	1.99E-04	2	3	CRH,NPY
Pubmed	9868202	Neuropeptide Y and corticotropin-releasing hormone concentrations within specific hypothalamic regions of lean but not ob/ob mice respond to food-deprivation and refeeding.	Pubmed	6.36E-07	2.63E-03	2.23E-05	1.99E-04	2	3	CRH,NPY
Pubmed	19685709	[The investigation for the neuropeptides of nasal septum in perennial allergic rhinitis patient].	Pubmed	6.36E-07	2.63E-03	2.23E-05	1.99E-04	2	3	VIP,TAC1
Pubmed	18289674	Observations favouring the occurrence of local production and marked effects of bombesin/gastrin-releasing peptide in the synovial tissue of the human knee joint--comparisons with substance P and the NK-1 receptor.	Pubmed	6.36E-07	2.63E-03	2.23E-05	1.99E-04	2	3	GRP,TAC1
Pubmed	17911468	Are neuropeptides important in arthritis? Studies on the importance of bombesin/GRP and substance P in a murine arthritis model.	Pubmed	6.36E-07	2.63E-03	2.23E-05	1.99E-04	2	3	GRP,TAC1
Pubmed	18650785	Vasoactive Intestinal Peptide and pituary adenylate cyclase-activating polypeptide inhibit tissue factor expression in monocyte in vitro and in vivo.	Pubmed	6.36E-07	2.63E-03	2.23E-05	1.99E-04	2	3	VIP,ADCYAP1
Pubmed	15159534	Corticotropin-releasing hormone (CRH) requirement in Clostridium difficile toxin A-mediated intestinal inflammation.	Pubmed	6.36E-07	2.63E-03	2.23E-05	1.99E-04	2	3	TAC1,CRH
Pubmed	22393040	Human cathepsin V protease participates in production of enkephalin and NPY neuropeptide neurotransmitters.	Pubmed	6.36E-07	2.63E-03	2.23E-05	1.99E-04	2	3	NPY,PENK
Pubmed	29681453	Dissociable Structural and Functional Hippocampal Outputs via Distinct Subiculum Cell Classes.	Pubmed	6.36E-07	2.63E-03	2.23E-05	1.99E-04	2	3	NPY,NTS
Pubmed	23499760	Role of Pituitary Adenylate-Cyclase Activating Polypeptide and Tac1 gene derived tachykinins in sensory, motor and vascular functions under normal and neuropathic conditions.	Pubmed	6.36E-07	2.63E-03	2.23E-05	1.99E-04	2	3	TAC1,ADCYAP1
Pubmed	27507595	The interaction of fasting, caloric restriction, and diet-induced obesity with 17?-estradiol on the expression of KNDy neuropeptides and their receptors in the female mouse.	Pubmed	6.36E-07	2.63E-03	2.23E-05	1.99E-04	2	3	TAC3,PDYN
Pubmed	10644901	Dopaminergic agonists normalize elevated hypothalamic neuropeptide Y and corticotropin-releasing hormone, body weight gain, and hyperglycemia in ob/ob mice.	Pubmed	6.36E-07	2.63E-03	2.23E-05	1.99E-04	2	3	CRH,NPY
Pubmed	24010162	Thyrotropin-releasing hormone, luteinizing hormone-releasing hormone and substance P immuno-reactivity in post-mortem brain from cases of Alzheimer-type dementia and Down's syndrome.	Pubmed	6.36E-07	2.63E-03	2.23E-05	1.99E-04	2	3	TRH,TAC1
Pubmed	16226889	Characterization of novel splice variants of the PAC1 receptor in human neuroblastoma cells: consequences for signaling by VIP and PACAP.	Pubmed	6.36E-07	2.63E-03	2.23E-05	1.99E-04	2	3	VIP,ADCYAP1
Pubmed	20580442	Common variants of the neuropeptide expressing tachykinin genes and susceptibility to asthma: a case-control study.	Pubmed	6.36E-07	2.63E-03	2.23E-05	1.99E-04	2	3	TAC1,TAC3
Pubmed	18184800	Opioid neuropeptide genotypes in relation to heroin abuse: dopamine tone contributes to reversed mesolimbic proenkephalin expression.	Pubmed	6.36E-07	2.63E-03	2.23E-05	1.99E-04	2	3	PDYN,PENK
Pubmed	21426768	[Expression of protein gene product 9.5, vasoactive intestinal peptide and neuropeptide Y in the mucosa of the neovagina after sigmoid colon vaginoplasty].	Pubmed	6.36E-07	2.63E-03	2.23E-05	1.99E-04	2	3	VIP,NPY
Pubmed	28394324	Abnormal wiring of CCK(+) basket cells disrupts spatial information coding.	Pubmed	6.36E-07	2.63E-03	2.23E-05	1.99E-04	2	3	VIP,CCK
Pubmed	12074933	Direct antimicrobial properties of substance P.	Pubmed	6.36E-07	2.63E-03	2.23E-05	1.99E-04	2	3	TAC1,NTS
Pubmed	17495962	CGRP, PACAP, and VIP modulate Langerhans cell function by inhibiting NF-kappaB activation.	Pubmed	1.27E-06	5.26E-03	3.95E-05	3.52E-04	2	4	VIP,ADCYAP1
Pubmed	12372411	Vasoactive intestinal peptide and pituitary adenylate cyclase-activating polypeptide inhibit CBP-NF-kappaB interaction in activated microglia.	Pubmed	1.27E-06	5.26E-03	3.95E-05	3.52E-04	2	4	VIP,ADCYAP1
Pubmed	8702757	The unpredicted high affinities of a large number of naturally occurring tachykinins for chimeric NK1/NK3 receptors suggest a role for an inhibitory domain in determining receptor specificity.	Pubmed	1.27E-06	5.26E-03	3.95E-05	3.52E-04	2	4	TAC1,TAC3
Pubmed	17632507	A tarantula peptide against pain via ASIC1a channels and opioid mechanisms.	Pubmed	1.27E-06	5.26E-03	3.95E-05	3.52E-04	2	4	TAC1,PDYN
Pubmed	19131325	Striatal alterations of secretogranin-1, somatostatin, prodynorphin, and cholecystokinin peptides in an experimental mouse model of Parkinson disease.	Pubmed	1.27E-06	5.26E-03	3.95E-05	3.52E-04	2	4	CCK,PDYN
Pubmed	17467916	The absence of endogenous beta-endorphin selectively blocks phosphorylation and desensitization of mu opioid receptors following partial sciatic nerve ligation.	Pubmed	1.27E-06	5.26E-03	3.95E-05	3.52E-04	2	4	PDYN,PENK
Pubmed	28166221	A molecular census of arcuate hypothalamus and median eminence cell types.	Pubmed	1.27E-06	5.26E-03	3.95E-05	3.52E-04	2	4	TRH,CCK
Pubmed	16673392	Development and topography of the lateral olfactory tract in the mouse: imaging by genetically encoded and injected fluorescent markers.	Pubmed	1.27E-06	5.26E-03	3.95E-05	3.52E-04	2	4	CCK,NTS
Pubmed	29381655	Integrated analysis of the genetic basis of suicidal behavior: what has been shown by structural genetic studies so far.	Pubmed	1.27E-06	5.26E-03	3.95E-05	3.52E-04	2	4	NPY,CCK
Pubmed	30122374	Inhibitory Control of Prefrontal Cortex by the Claustrum.	Pubmed	1.27E-06	5.26E-03	3.95E-05	3.52E-04	2	4	VIP,NPY
Pubmed	29133874	Distinct roles of NMB and GRP in itch transmission.	Pubmed	1.27E-06	5.26E-03	3.95E-05	3.52E-04	2	4	GRP,NMB
Pubmed	29632359	A hypothalamic circuit for the circadian control of aggression.	Pubmed	1.27E-06	5.26E-03	3.95E-05	3.52E-04	2	4	VIP,ADCYAP1
Pubmed	29155851	PAC1- and VPAC2 receptors in light regulated behavior and physiology: Studies in single and double mutant mice.	Pubmed	1.27E-06	5.26E-03	3.95E-05	3.52E-04	2	4	VIP,ADCYAP1
Pubmed	7631421	PKR: a new name and new roles.	Pubmed	1.27E-06	5.26E-03	3.95E-05	3.52E-04	2	4	PDYN,PENK
Pubmed	7961636	The ligand binding site of the neurokinin 2 receptor. Site-directed mutagenesis and identification of neurokinin A binding residues in the human neurokinin 2 receptor.	Pubmed	1.27E-06	5.26E-03	3.95E-05	3.52E-04	2	4	TAC1,TAC3
Pubmed	23744642	Regulation of arcuate neurons coexpressing kisspeptin, neurokinin B, and dynorphin by modulators of neurokinin 3 and ?-opioid receptors in adult male mice.	Pubmed	2.12E-06	8.76E-03	6.26E-05	5.57E-04	2	5	TAC3,PDYN
Pubmed	12773411	A role for tachykinins in female mouse and rat reproductive function.	Pubmed	2.12E-06	8.76E-03	6.26E-05	5.57E-04	2	5	TAC1,TAC3
Pubmed	17115416	PACAP/PAC1 autocrine system promotes proliferation and astrogenesis in neural progenitor cells.	Pubmed	2.12E-06	8.76E-03	6.26E-05	5.57E-04	2	5	VIP,ADCYAP1
Pubmed	10189055	Tachykinin receptors on human monocytes: their involvement in rheumatoid arthritis.	Pubmed	2.12E-06	8.76E-03	6.26E-05	5.57E-04	2	5	TAC1,TAC3
Pubmed	16865686	Characterization of a mouse strain expressing Cre recombinase from the 3' untranslated region of the dopamine transporter locus.	Pubmed	2.12E-06	8.76E-03	6.26E-05	5.57E-04	2	5	PDYN,PENK
Pubmed	15158076	Transgenic mice ectopically expressing HOXA5 in the dorsal spinal cord show structural defects of the cervical spinal cord along with sensory and motor defects of the forelimb.	Pubmed	2.12E-06	8.76E-03	6.26E-05	5.57E-04	2	5	TAC1,TAC3
Pubmed	27068287	Critical evaluation of the expression of gastrin-releasing peptide in dorsal root ganglia and spinal cord.	Pubmed	2.12E-06	8.76E-03	6.26E-05	5.57E-04	2	5	GRP,TAC1
Pubmed	11140838	A multivariate analysis of 59 candidate genes in personality traits: the temperament and character inventory.	Pubmed	2.71E-06	1.12E-02	7.95E-05	7.08E-04	3	58	CRH,CCK,PENK
Pubmed	9746745	Expression of opioid receptors and ligands in pregnant mouse uterus and placenta.	Pubmed	3.18E-06	1.31E-02	8.94E-05	7.96E-04	2	6	PDYN,PENK
Pubmed	11748295	Immunocytochemical detection of orexin A in endocrine cells of the developing mouse gut.	Pubmed	3.18E-06	1.31E-02	8.94E-05	7.96E-04	2	6	TAC1,NPY
Pubmed	25157144	MC4R-expressing glutamatergic neurons in the paraventricular hypothalamus regulate feeding and are synaptically connected to the parabrachial nucleus.	Pubmed	3.18E-06	1.31E-02	8.94E-05	7.96E-04	2	6	CRH,PDYN
Pubmed	23064014	A major lineage of enteroendocrine cells coexpress CCK, secretin, GIP, GLP-1, PYY, and neurotensin but not somatostatin.	Pubmed	3.18E-06	1.31E-02	8.94E-05	7.96E-04	2	6	CCK,NTS
Pubmed	28985566	Brain-wide Maps Reveal Stereotyped Cell-Type-Based Cortical Architecture and Subcortical Sexual Dimorphism.	Pubmed	3.18E-06	1.31E-02	8.94E-05	7.96E-04	2	6	VIP,CCK
Pubmed	22700375	Effects of CYP-induced cystitis on PACAP/VIP and receptor expression in micturition pathways and bladder function in mice with overexpression of NGF in urothelium.	Pubmed	3.18E-06	1.31E-02	8.94E-05	7.96E-04	2	6	VIP,ADCYAP1
Pubmed	20398908	Comprehensive copy number variant (CNV) analysis of neuronal pathways genes in psychiatric disorders identifies rare variants within patients.	Pubmed	4.20E-06	1.74E-02	1.17E-04	1.05E-03	3	67	TRH,VIP,CORT
Pubmed	7913715	Organization of the embryonic and early postnatal murine hippocampus. I. Immunocytochemical characterization of neuronal populations in the subplate and marginal zone.	Pubmed	4.44E-06	1.84E-02	1.20E-04	1.07E-03	2	7	NPY,CCK
Pubmed	22710612	The LIM homeodomain protein Lhx6 regulates maturation of interneurons and network excitability in the mammalian cortex.	Pubmed	4.44E-06	1.84E-02	1.20E-04	1.07E-03	2	7	VIP,NPY
Pubmed	10640708	ARNT2 acts as the dimerization partner of SIM1 for the development of the hypothalamus.	Pubmed	4.44E-06	1.84E-02	1.20E-04	1.07E-03	2	7	TRH,CRH
Pubmed	12270041	Neuronal nitric oxide synthase expression in the mouse vomeronasal organ during prenatal development.	Pubmed	4.44E-06	1.84E-02	1.20E-04	1.07E-03	2	7	VIP,TAC1
Pubmed	14975719	PITX2 is required for normal development of neurons in the mouse subthalamic nucleus and midbrain.	Pubmed	4.44E-06	1.84E-02	1.20E-04	1.07E-03	2	7	TAC1,PENK
Pubmed	12036966	Selective inhibition of heterotrimeric Gs signaling. Targeting the receptor-G protein interface using a peptide minigene encoding the Galpha(s) carboxyl terminus.	Pubmed	4.79E-06	1.98E-02	1.29E-04	1.15E-03	3	70	VIP,CRH,PTHLH
Pubmed	20921407	Loss of Goosecoid-like and DiGeorge syndrome critical region 14 in interpeduncular nucleus results in altered regulation of rapid eye movement sleep.	Pubmed	5.92E-06	2.45E-02	1.52E-04	1.36E-03	2	8	TAC1,PENK
Pubmed	12473660	The stability of the G protein-coupled receptor-beta-arrestin interaction determines the mechanism and functional consequence of ERK activation.	Pubmed	5.92E-06	2.45E-02	1.52E-04	1.36E-03	2	8	TRH,NTS
Pubmed	14988428	Sim2 contributes to neuroendocrine hormone gene expression in the anterior hypothalamus.	Pubmed	5.92E-06	2.45E-02	1.52E-04	1.36E-03	2	8	TRH,CRH
Pubmed	23649822	Conditional deletion of neurogenin-3 using Nkx2.1iCre results in a mouse model for the central control of feeding, activity and obesity.	Pubmed	5.92E-06	2.45E-02	1.52E-04	1.36E-03	2	8	NPY,PDYN
Pubmed	24855103	Preimplantation mouse embryo is a target for opioid ligand-receptor signaling.	Pubmed	5.92E-06	2.45E-02	1.52E-04	1.36E-03	2	8	PDYN,PENK
Pubmed	10069332	Gene targeting reveals a critical role for neurturin in the development and maintenance of enteric, sensory, and parasympathetic neurons.	Pubmed	5.92E-06	2.45E-02	1.52E-04	1.36E-03	2	8	VIP,TAC1
Pubmed	18313668	Mice lacking the transcription factor Ikaros display behavioral alterations of an anti-depressive phenotype.	Pubmed	5.92E-06	2.45E-02	1.52E-04	1.36E-03	2	8	TAC1,PENK
Pubmed	20734064	A large-scale candidate gene association study of age at menarche and age at natural menopause.	Pubmed	7.58E-06	3.14E-02	1.90E-04	1.69E-03	4	275	NPY,CCK,PDYN,PENK
Pubmed	8876243	Targeted deletion of the mouse POU domain gene Brn-3a causes selective loss of neurons in the brainstem and trigeminal ganglion, uncoordinated limb movement, and impaired suckling.	Pubmed	7.62E-06	3.15E-02	1.90E-04	1.69E-03	2	9	TAC1,NPY
Pubmed	12012374	Developmental timing of hair follicle and dorsal skin innervation in mice.	Pubmed	7.62E-06	3.15E-02	1.90E-04	1.69E-03	2	9	VIP,TAC1
Pubmed	10321434	Rodent mutant models of obesity and their correlations to human obesity.	Pubmed	7.62E-06	3.15E-02	1.90E-04	1.69E-03	2	9	CRH,NPY
Pubmed	9834195	Multipotential progenitors of the mammalian enteric nervous system capable of colonising aganglionic bowel in organ culture.	Pubmed	7.62E-06	3.15E-02	1.90E-04	1.69E-03	2	9	VIP,NPY
Pubmed	8697804	Seven genes from human chromosome 18 map to chromosome 24 in the bovine.	Pubmed	9.52E-06	3.94E-02	2.30E-04	2.05E-03	2	10	GRP,ADCYAP1
Pubmed	9784500	Development of neuroendocrine lineages requires the bHLH-PAS transcription factor SIM1.	Pubmed	9.52E-06	3.94E-02	2.30E-04	2.05E-03	2	10	TRH,CRH
Pubmed	18987169	Homeodomain transcription factor NKX2.2 functions in immature cells to control enteroendocrine differentiation and is expressed in gastrointestinal neuroendocrine tumors.	Pubmed	9.52E-06	3.94E-02	2.30E-04	2.05E-03	2	10	TAC1,CCK
Pubmed	27618674	Strategies and Tools for Combinatorial Targeting of GABAergic Neurons in Mouse Cerebral Cortex.	Pubmed	9.52E-06	3.94E-02	2.30E-04	2.05E-03	2	10	VIP,CCK
Pubmed	30318414	Rbfox1 Mediates Cell-type-Specific Splicing in Cortical Interneurons.	Pubmed	9.52E-06	3.94E-02	2.30E-04	2.05E-03	2	10	TAC1,NPY
Pubmed	20173430	Frequencies of polymorphisms in cytokines, neurotransmitters and adrenergic receptors in patients with complex regional pain syndrome type I after distal radial fracture.	Pubmed	1.16E-05	4.81E-02	2.77E-04	2.46E-03	2	11	TAC1,NPY
Pubmed	8543156	Development and survival of the endocrine hypothalamus and posterior pituitary gland requires the neuronal POU domain factor Brn-2.	Pubmed	1.16E-05	4.81E-02	2.77E-04	2.46E-03	2	11	TRH,CRH
Pubmed	26232227	The Regulatory Factor ZFHX3 Modifies Circadian Function in SCN via an AT Motif-Driven Axis.	Pubmed	1.16E-05	4.81E-02	2.77E-04	2.46E-03	2	11	VIP,GRP
Pubmed	7752808	Chromosomal localization of opioid peptide and receptor genes in the mouse.	Pubmed	1.40E-05	5.77E-02	3.28E-04	2.92E-03	2	12	PDYN,PENK
Pubmed	21430164	Loss of COUP-TFI alters the balance between caudal ganglionic eminence- and medial ganglionic eminence-derived cortical interneurons and results in resistance to epilepsy.	Pubmed	1.40E-05	5.77E-02	3.28E-04	2.92E-03	2	12	VIP,NPY
Pubmed	10557207	Progressive impairment of developing neuroendocrine cell lineages in the hypothalamus of mice lacking the Orthopedia gene.	Pubmed	1.65E-05	6.82E-02	3.81E-04	3.39E-03	2	13	TRH,CRH
Pubmed	19114063	Impaired neurogenesis in embryonic spinal cord of Phgdh knockout mice, a serine deficiency disorder model.	Pubmed	1.65E-05	6.82E-02	3.81E-04	3.39E-03	2	13	TAC1,NPY
Pubmed	11071765	The murine Otp homeobox gene plays an essential role in the specification of neuronal cell lineages in the developing hypothalamus.	Pubmed	1.65E-05	6.82E-02	3.81E-04	3.39E-03	2	13	TRH,CRH
Pubmed	18443282	Modular patterning of structure and function of the striatum by retinoid receptor signaling.	Pubmed	1.92E-05	7.95E-02	4.42E-04	3.94E-03	2	14	PDYN,PENK
Pubmed	20507551	Sonic hedgehog expressing and responding cells generate neuronal diversity in the medial amygdala.	Pubmed	2.22E-05	9.18E-02	4.96E-04	4.42E-03	2	15	NPY,CCK
Pubmed	17965053	Selective cortical interneuron and GABA deficits in cyclin D2-null mice.	Pubmed	2.22E-05	9.18E-02	4.96E-04	4.42E-03	2	15	VIP,NPY
Pubmed	30146317	The Evf2 Ultraconserved Enhancer lncRNA Functionally and Spatially Organizes Megabase Distant Genes in the Developing Forebrain.	Pubmed	2.22E-05	9.18E-02	4.96E-04	4.42E-03	2	15	VIP,NPY
Pubmed	10934256	Origin and molecular specification of striatal interneurons.	Pubmed	2.22E-05	9.18E-02	4.96E-04	4.42E-03	2	15	NPY,PENK
Pubmed	23064108	Epileptiform activity and cognitive deficits in SNAP-25(+/-) mice are normalized by antiepileptic drugs.	Pubmed	2.22E-05	9.18E-02	4.96E-04	4.42E-03	2	15	NPY,CCK
Pubmed	18996102	Physiogenomic comparison of edema and BMI in patients receiving rosiglitazone or pioglitazone.	Pubmed	2.25E-05	9.29E-02	4.99E-04	4.45E-03	3	117	CRH,NPY,CCK
Pubmed	22090484	A wide diversity of cortical GABAergic interneurons derives from the embryonic preoptic area.	Pubmed	2.53E-05	1.05E-01	5.49E-04	4.89E-03	2	16	VIP,NPY
Pubmed	22021915	A subpopulation of dorsal lateral/caudal ganglionic eminence-derived neocortical interneurons expresses the transcription factor Sp8.	Pubmed	2.53E-05	1.05E-01	5.49E-04	4.89E-03	2	16	VIP,NPY
Pubmed	26389685	Cell adhesion molecule contactin-associated protein 3 is expressed in the mouse basal ganglia during early postnatal stages.	Pubmed	2.53E-05	1.05E-01	5.49E-04	4.89E-03	2	16	TAC1,PENK
Pubmed	28685891	Specification of neurotransmitter identity by Tal1 in thalamic nuclei.	Pubmed	2.53E-05	1.05E-01	5.49E-04	4.89E-03	2	16	NPY,PENK
Pubmed	17717072	Pubertal impairment in Nhlh2 null mice is associated with hypothalamic and pituitary deficiencies.	Pubmed	2.53E-05	1.05E-01	5.49E-04	4.89E-03	2	16	VIP,NPY
Pubmed	10357937	Analysis of mice carrying targeted mutations of the glucocorticoid receptor gene argues against an essential role of glucocorticoid signalling for generating adrenal chromaffin cells.	Pubmed	2.87E-05	1.19E-01	6.09E-04	5.42E-03	2	17	NPY,PENK
Pubmed	17400205	Role of the Onecut transcription factors in pancreas morphogenesis and in pancreatic and enteric endocrine differentiation.	Pubmed	2.87E-05	1.19E-01	6.09E-04	5.42E-03	2	17	CCK,NTS
Pubmed	26727548	Adult mouse cortical cell taxonomy revealed by single cell transcriptomics.	Pubmed	2.87E-05	1.19E-01	6.09E-04	5.42E-03	2	17	VIP,TAC1
Pubmed	19709629	The cell-intrinsic requirement of Sox6 for cortical interneuron development.	Pubmed	2.87E-05	1.19E-01	6.09E-04	5.42E-03	2	17	VIP,NPY
Pubmed	19058789	A common variant in DRD3 receptor is associated with autism spectrum disorder.	Pubmed	3.01E-05	1.24E-01	6.34E-04	5.65E-03	3	129	NPY,CCK,PNOC
Pubmed	20495559	A neuronal migratory pathway crossing from diencephalon to telencephalon populates amygdala nuclei.	Pubmed	3.23E-05	1.34E-01	6.58E-04	5.86E-03	2	18	TRH,CRH
Pubmed	30472119	Dual embryonic origin of the mammalian enteric nervous system.	Pubmed	3.23E-05	1.34E-01	6.58E-04	5.86E-03	2	18	VIP,NPY
Pubmed	18430798	Loss of Hoxb8 alters spinal dorsal laminae and sensory responses in mice.	Pubmed	3.23E-05	1.34E-01	6.58E-04	5.86E-03	2	18	TAC1,PENK
Pubmed	20346763	Loss of inhibitory interneurons in the dorsal spinal cord and elevated itch in Bhlhb5 mutant mice.	Pubmed	3.23E-05	1.34E-01	6.58E-04	5.86E-03	2	18	GRP,TAC1
Pubmed	23616538	Genome-wide expression analysis of Ptf1a- and Ascl1-deficient mice reveals new markers for distinct dorsal horn interneuron populations contributing to nociceptive reflex plasticity.	Pubmed	3.23E-05	1.34E-01	6.58E-04	5.86E-03	2	18	NPY,PDYN
Pubmed	18250082	Gene expression in cortical interneuron precursors is prescient of their mature function.	Pubmed	3.23E-05	1.34E-01	6.58E-04	5.86E-03	2	18	TAC1,NPY
Pubmed	19470168	NPAS2 and PER2 are linked to risk factors of the metabolic syndrome.	Pubmed	3.23E-05	1.34E-01	6.58E-04	5.86E-03	2	18	VIP,ADCYAP1
Pubmed	28433741	Loss of the neurodevelopmental gene Zswim6 alters striatal morphology and motor regulation.	Pubmed	3.61E-05	1.49E-01	7.25E-04	6.45E-03	2	19	TAC1,PENK
Pubmed	24027274	Ontogeny of excitatory spinal neurons processing distinct somatic sensory modalities.	Pubmed	3.61E-05	1.49E-01	7.25E-04	6.45E-03	2	19	GRP,TAC1
Pubmed	20072116	Differential association of circadian genes with mood disorders: CRY1 and NPAS2 are associated with unipolar major depression and CLOCK and VIP with bipolar disorder.	Pubmed	3.61E-05	1.49E-01	7.25E-04	6.45E-03	2	19	VIP,ADCYAP1
Pubmed	23591430	The transcription factor Hmx1 and growth factor receptor activities control sympathetic neurons diversification.	Pubmed	4.01E-05	1.66E-01	7.97E-04	7.10E-03	2	20	VIP,NPY
Pubmed	17460091	Inactivation of Arx, the murine ortholog of the X-linked lissencephaly with ambiguous genitalia gene, leads to severe disorganization of the ventral telencephalon with impaired neuronal migration and differentiation.	Pubmed	4.01E-05	1.66E-01	7.97E-04	7.10E-03	2	20	NPY,PENK
Pubmed	27076429	Ascl1 Is Required for the Development of Specific Neuronal Subtypes in the Enteric Nervous System.	Pubmed	4.43E-05	1.83E-01	8.64E-04	7.70E-03	2	21	VIP,NPY
Pubmed	8641130	Report of the sixth international workshop on human chromosome 3 mapping 1995.	Pubmed	4.43E-05	1.83E-01	8.64E-04	7.70E-03	2	21	TRH,CCK
Pubmed	19657336	SOX6 controls dorsal progenitor identity and interneuron diversity during neocortical development.	Pubmed	4.43E-05	1.83E-01	8.64E-04	7.70E-03	2	21	VIP,NPY
Pubmed	28289129	Helios expression coordinates the development of a subset of striatopallidal medium spiny neurons.	Pubmed	4.43E-05	1.83E-01	8.64E-04	7.70E-03	2	21	TAC1,PENK
Pubmed	19020049	Neuronal death resulting from targeted disruption of the Snf2 protein ATRX is mediated by p53.	Pubmed	4.87E-05	2.02E-01	9.41E-04	8.38E-03	2	22	NPY,CCK
Pubmed	1684952	Molecular genetic linkage maps of mouse chromosomes 4 and 6.	Pubmed	4.87E-05	2.02E-01	9.41E-04	8.38E-03	2	22	TAC1,NPY
Pubmed	28288114	Disruption of the ATXN1-CIC complex causes a spectrum of neurobehavioral phenotypes in mice and humans.	Pubmed	5.33E-05	2.21E-01	9.99E-04	8.90E-03	2	23	NPY,PDYN
Pubmed	12724834	Patterning of the lateral ganglionic eminence by the Gsh1 and Gsh2 homeobox genes regulates striatal and olfactory bulb histogenesis and the growth of axons through the basal ganglia.	Pubmed	6.32E-05	2.61E-01	9.99E-04	8.90E-03	2	25	NPY,PENK
Pubmed	25467980	NPAS1 represses the generation of specific subtypes of cortical interneurons.	Pubmed	6.32E-05	2.61E-01	9.99E-04	8.90E-03	2	25	VIP,NPY
Pubmed	20392955	Dlx5 and Dlx6 regulate the development of parvalbumin-expressing cortical interneurons.	Pubmed	7.39E-05	3.06E-01	9.99E-04	8.90E-03	2	27	TAC1,NPY
Pubmed	16230531	Gfi1 functions downstream of Math1 to control intestinal secretory cell subtype allocation and differentiation.	Pubmed	7.39E-05	3.06E-01	9.99E-04	8.90E-03	2	27	CCK,NTS
Pubmed	29967281	SP8 and SP9 coordinately promote D2-type medium spiny neuron production by activating	Pubmed	7.39E-05	3.06E-01	9.99E-04	8.90E-03	2	27	TAC1,PENK
Pubmed	22991444	Transcriptional regulatory mechanisms underlying the GABAergic neuron fate in different diencephalic prosomeres.	Pubmed	7.95E-05	3.29E-01	9.99E-04	8.90E-03	2	28	NPY,PENK
Pubmed	28942923	Transcriptional Architecture of Synaptic Communication Delineates GABAergic Neuron Identity.	Pubmed	8.54E-05	3.53E-01	9.99E-04	8.90E-03	2	29	VIP,CCK
Pubmed	18077674	The neonatal ventromedial hypothalamus transcriptome reveals novel markers with spatially distinct patterning.	Pubmed	8.54E-05	3.53E-01	9.99E-04	8.90E-03	2	29	NPY,ADCYAP1
Pubmed	27571008	Visceral motor neuron diversity delineates a cellular basis for nipple- and pilo-erection muscle control.	Pubmed	9.78E-05	4.05E-01	9.99E-04	8.90E-03	2	31	VIP,NPY
Pubmed	23863478	Specification of dopaminergic subsets involves interplay of En1 and Pitx3.	Pubmed	9.78E-05	4.05E-01	9.99E-04	8.90E-03	2	31	CCK,NTS
Pubmed	20602615	Physiogenomic analysis of statin-treated patients: domain-specific counter effects within the ACACB gene on low-density lipoprotein cholesterol?	Pubmed	9.80E-05	4.06E-01	9.99E-04	8.90E-03	3	192	CRH,NPY,CCK
Pubmed	1628813	Rat gene mapping using PCR-analyzed microsatellites.	Pubmed	1.64E-04	6.77E-01	9.99E-04	8.90E-03	2	40	PTHLH,NPY
Pubmed	19000842	Atlas of gene expression in the developing kidney at microanatomic resolution.	Pubmed	2.56E-04	1.00E+00	9.99E-04	8.90E-03	2	50	NPY,NTS
Pubmed	11180952	A large-scale in situ screen provides molecular evidence for the induction of eye anterior segment structures by the developing lens.	Pubmed	3.10E-04	1.00E+00	9.99E-04	8.90E-03	2	55	TAC1,PENK
Pubmed	21491542	Expression of metanephric nephron-patterning genes in differentiating mesonephric tubules.	Pubmed	4.07E-04	1.00E+00	9.99E-04	8.90E-03	2	63	VIP,NPY
Pubmed	15142957	Gene expression analysis of the late embryonic mouse cerebral cortex using DNA microarray: identification of several region- and layer-specific genes.	Pubmed	4.33E-04	1.00E+00	9.99E-04	8.90E-03	2	65	NPY,PENK
Pubmed	2928340	Isolation and characterization of the human parathyroid hormone-like peptide gene.	Pubmed	4.74E-04	1.00E+00	9.99E-04	8.90E-03	1	1	PTHLH
Pubmed	10952910	Collagen studies in late pregnant relaxin null mice.	Pubmed	4.74E-04	1.00E+00	9.99E-04	8.90E-03	1	1	RLN1
Pubmed	3899557	Structure of the human vasoactive intestinal polypeptide gene.	Pubmed	4.74E-04	1.00E+00	9.99E-04	8.90E-03	1	1	VIP
Pubmed	21717232	Mice deficient in pituitary adenylate cyclase activating polypeptide (PACAP) are more susceptible to retinal ischemic injury in vivo.	Pubmed	4.74E-04	1.00E+00	9.99E-04	8.90E-03	1	1	ADCYAP1
Pubmed	17588657	In vitro substance P-dependent induction of bone marrow cells in common (CD10) acute lymphoblastic leukaemia.	Pubmed	4.74E-04	1.00E+00	9.99E-04	8.90E-03	1	1	TAC1
Pubmed	18166594	Enhancement of pulmonary vascular remodelling and inflammatory genes with VIP gene deletion.	Pubmed	4.74E-04	1.00E+00	9.99E-04	8.90E-03	1	1	VIP
Pubmed	11814620	Neuropeptide Y-induced angiogenesis in aging.	Pubmed	4.74E-04	1.00E+00	9.99E-04	8.90E-03	1	1	NPY
Pubmed	20417061	Low density of sympathetic nerve fibers relative to substance P-positive nerve fibers in lesional skin of chronic pruritus and prurigo nodularis.	Pubmed	4.74E-04	1.00E+00	9.99E-04	8.90E-03	1	1	TAC1
Pubmed	2829195	Identification of a cDNA encoding a parathyroid hormone-like peptide from a human tumor associated with humoral hypercalcemia of malignancy.	Pubmed	4.74E-04	1.00E+00	9.99E-04	8.90E-03	1	1	PTHLH
Pubmed	15469890	Gene expression profiles highlight adaptive brain mechanisms in corticotropin releasing factor overexpressing mice.	Pubmed	4.74E-04	1.00E+00	9.99E-04	8.90E-03	1	1	CRH
Pubmed	19404163	Lack of association between polymorphisms of neuropeptide Y and schizophrenia in Korean population.	Pubmed	4.74E-04	1.00E+00	9.99E-04	8.90E-03	1	1	NPY
Pubmed	20531438	Neuropeptide Y gene polymorphisms are not associated with obesity in a South Indian population.	Pubmed	4.74E-04	1.00E+00	9.99E-04	8.90E-03	1	1	NPY
Pubmed	9886867	Abundance of cyclo (His-Pro)-like immunoreactivity in the brain of TRH-deficient mice.	Pubmed	4.74E-04	1.00E+00	9.99E-04	8.90E-03	1	1	TRH
Pubmed	15561942	Characterization of mice doubly transgenic for parathyroid hormone-related protein and murine placental lactogen: a novel role for placental lactogen in pancreatic beta-cell survival.	Pubmed	4.74E-04	1.00E+00	9.99E-04	8.90E-03	1	1	PTHLH
Pubmed	17717054	Insulin secretion is increased in pancreatic islets of neuropeptide Y-deficient mice.	Pubmed	4.74E-04	1.00E+00	9.99E-04	8.90E-03	1	1	NPY
Pubmed	21719534	Leucine deprivation stimulates fat loss via increasing CRH expression in the hypothalamus and activating the sympathetic nervous system.	Pubmed	4.74E-04	1.00E+00	9.99E-04	8.90E-03	1	1	CRH
Pubmed	30905392	Distinct Cortical-Thalamic-Striatal Circuits through the Parafascicular Nucleus.	Pubmed	4.74E-04	1.00E+00	9.99E-04	8.90E-03	1	1	PDYN
Pubmed	23325838	Pharmacological inhibition of VIP signaling enhances antiviral immunity and improves survival in murine cytomegalovirus-infected allogeneic bone marrow transplant recipients.	Pubmed	4.74E-04	1.00E+00	9.99E-04	8.90E-03	1	1	VIP
Pubmed	28968722	Subcellular Targeting of VIP Boutons in Mouse Barrel Cortex is Layer-Dependent and not Restricted to Interneurons.	Pubmed	4.74E-04	1.00E+00	9.99E-04	8.90E-03	1	1	VIP
Pubmed	22584873	Genetic variation in the neuropeptide Y gene promoter is associated with increased risk of tobacco smoking.	Pubmed	4.74E-04	1.00E+00	9.99E-04	8.90E-03	1	1	NPY
Pubmed	27639644	Overexpression of pro-gastrin releasing peptide promotes the cell proliferation and progression in small cell lung cancer.	Pubmed	4.74E-04	1.00E+00	9.99E-04	8.90E-03	1	1	GRP
Pubmed	19127063	Low levels of corticotropin-releasing hormone during early pregnancy are associated with precocious maturation of the human fetus.	Pubmed	4.74E-04	1.00E+00	9.99E-04	8.90E-03	1	1	CRH
Pubmed	10854780	Genomic structure and expression of parathyroid hormone-related protein gene (PTHrP) in a teleost, Fugu rubripes.	Pubmed	4.74E-04	1.00E+00	9.99E-04	8.90E-03	1	1	PTHLH
Pubmed	18441300	VIP and VIP gene silencing modulation of differentiation marker N-cadherin and cell shape of corneal endothelium in human corneas ex vivo.	Pubmed	4.74E-04	1.00E+00	9.99E-04	8.90E-03	1	1	VIP
Pubmed	22966009	Neuropeptide Y promoter polymorphism modifies effects of a weight-loss diet on 2-year changes of blood pressure: the preventing overweight using novel dietary strategies trial.	Pubmed	4.74E-04	1.00E+00	9.99E-04	8.90E-03	1	1	NPY
Pubmed	11443535	Identification of a compound short tandem repeat stretch in the 5'-upstream region of the cholecystokinin gene, and its association with panic disorder but not with schizophrenia.	Pubmed	4.74E-04	1.00E+00	9.99E-04	8.90E-03	1	1	CCK
Pubmed	22644900	Effects of PACAP on intracellular signaling pathways in human retinal pigment epithelial cells exposed to oxidative stress.	Pubmed	4.74E-04	1.00E+00	9.99E-04	8.90E-03	1	1	ADCYAP1
Pubmed	20943787	Elevated corticotropin releasing hormone (CRH) during pregnancy and risk of postpartum depression (PPD).	Pubmed	4.74E-04	1.00E+00	9.99E-04	8.90E-03	1	1	CRH
Pubmed	22681041	Investigation of serum substance P status in patients with chronic pruritic skin lesions due to sulfur mustard: a cross-sectional study.	Pubmed	4.74E-04	1.00E+00	9.99E-04	8.90E-03	1	1	TAC1
Pubmed	20731814	Neurotensin is increased in serum of young children with autistic disorder.	Pubmed	4.74E-04	1.00E+00	9.99E-04	8.90E-03	1	1	NTS
Pubmed	24586556	Increased behavioral and neuronal responses to a hallucinogenic drug in PACAP heterozygous mutant mice.	Pubmed	4.74E-04	1.00E+00	9.99E-04	8.90E-03	1	1	ADCYAP1
Pubmed	21259400	Investigation of pituitary adenylate cyclase activating polypeptide in human gynecological and other biological fluids by using MALDI TOF mass spectrometry.	Pubmed	4.74E-04	1.00E+00	9.99E-04	8.90E-03	1	1	ADCYAP1
Pubmed	12864972	Absence of preproenkephalin increases the threshold for T cell activation.	Pubmed	4.74E-04	1.00E+00	9.99E-04	8.90E-03	1	1	PENK
Pubmed	15956704	Relaxin regulates collagen overproduction associated with experimental progressive renal fibrosis.	Pubmed	4.74E-04	1.00E+00	9.99E-04	8.90E-03	1	1	RLN1
Pubmed	9530155	DNA methylation contributes to expression of the human neurotensin/neuromedin N gene.	Pubmed	4.74E-04	1.00E+00	9.99E-04	8.90E-03	1	1	NTS
Pubmed	11968092	Genetic variation screening and association studies of the adenylate cyclase activating polypeptide 1 (ADCYAP1) gene in patients with type 2 diabetes.	Pubmed	4.74E-04	1.00E+00	9.99E-04	8.90E-03	1	1	ADCYAP1
Pubmed	23074208	The role of VIP in cornea.	Pubmed	4.74E-04	1.00E+00	9.99E-04	8.90E-03	1	1	VIP
Pubmed	26683132	Expression of Neuropeptide Y and Its Relationship with Molecular and Morphological Changes in Human Pituitary Adenomas.	Pubmed	4.74E-04	1.00E+00	9.99E-04	8.90E-03	1	1	NPY
Pubmed	25951888	Lulling immunity, pain, and stress to sleep with cortistatin.	Pubmed	4.74E-04	1.00E+00	9.99E-04	8.90E-03	1	1	CORT
Pubmed	22449753	Cerebrospinal fluid substance P-like immunoreactivity correlates with aggression in personality disordered subjects.	Pubmed	4.74E-04	1.00E+00	9.99E-04	8.90E-03	1	1	TAC1
Pubmed	19332041	Involvement of NMDA receptor in nociceptive effects elicited by intrathecal [Tyr6] gamma2-MSH(6-12), and the interaction with nociceptin/orphanin FQ in pain modulation in mice.	Pubmed	4.74E-04	1.00E+00	9.99E-04	8.90E-03	1	1	PNOC
Pubmed	18096456	Extracellular calcium regulates parathyroid hormone-related peptide expression in osteoblasts and osteoblast progenitor cells.	Pubmed	4.74E-04	1.00E+00	9.99E-04	8.90E-03	1	1	PTHLH
Pubmed	17868381	Interactions between the West Nile virus capsid protein and the host cell-encoded phosphatase inhibitor, I2PP2A.	Pubmed	4.74E-04	1.00E+00	9.99E-04	8.90E-03	1	1	SET
Pubmed	24039785	Pituitary adenylate cyclase activating peptide (PACAP) participates in adipogenesis by activating ERK signaling pathway.	Pubmed	4.74E-04	1.00E+00	9.99E-04	8.90E-03	1	1	ADCYAP1
Pubmed	15759545	Plasma neuropeptide Y concentration in kidney transplant patients during the early posttransplant period.	Pubmed	4.74E-04	1.00E+00	9.99E-04	8.90E-03	1	1	NPY
Pubmed	16639867	Modified dexamethasone suppression-corticotropin-releasing hormone stimulation test: A pilot study of young healthy volunteers and implications for alcoholism research in adolescents and young adults.	Pubmed	4.74E-04	1.00E+00	9.99E-04	8.90E-03	1	1	CRH
Pubmed	10359844	Corticotropin-releasing hormone deficiency unmasks the proinflammatory effect of epinephrine.	Pubmed	4.74E-04	1.00E+00	9.99E-04	8.90E-03	1	1	CRH
Pubmed	22959974	Expression of synovial fluid and articular cartilage VIP in human osteoarthritic knee: a new indicator of disease severity?	Pubmed	4.74E-04	1.00E+00	9.99E-04	8.90E-03	1	1	VIP
Pubmed	10468628	Targeted disruption of the orphanin FQ/nociceptin gene increases stress susceptibility and impairs stress adaptation in mice.	Pubmed	4.74E-04	1.00E+00	9.99E-04	8.90E-03	1	1	PNOC
Pubmed	14695766	Increased nociceptin/orphanin FQ plasma levels in hepatocellular carcinoma.	Pubmed	4.74E-04	1.00E+00	9.99E-04	8.90E-03	1	1	PNOC
Pubmed	22003086	Early postnatal exposure of mice to side-steam tobacco smoke increases neuropeptide Y in lung.	Pubmed	4.74E-04	1.00E+00	9.99E-04	8.90E-03	1	1	NPY
Pubmed	25574088	Altered vasoactive intestinal peptides expression in irritable bowel syndrome patients and rats with trinitrobenzene sulfonic acid-induced colitis.	Pubmed	4.74E-04	1.00E+00	9.99E-04	8.90E-03	1	1	VIP
Pubmed	19329780	Toward a stem cell gene therapy for breast cancer.	Pubmed	4.74E-04	1.00E+00	9.99E-04	8.90E-03	1	1	RLN1
Pubmed	15518898	Reduced hypothermic and hypnotic responses to ethanol in PACAP-deficient mice.	Pubmed	4.74E-04	1.00E+00	9.99E-04	8.90E-03	1	1	ADCYAP1
Pubmed	28336495	Genetic variation and epigenetic modification of the prodynorphin gene in peripheral blood cells in alcoholism.	Pubmed	4.74E-04	1.00E+00	9.99E-04	8.90E-03	1	1	PDYN
Pubmed	22155653	Increased cholecystokinin labeling in the hippocampus of a mouse model of epilepsy maps to spines and glutamatergic terminals.	Pubmed	4.74E-04	1.00E+00	9.99E-04	8.90E-03	1	1	CCK
Pubmed	21375557	Regulation of NK92-MI cell cytotoxicity by substance P.	Pubmed	4.74E-04	1.00E+00	9.99E-04	8.90E-03	1	1	TAC1
Pubmed	24937655	Prognostic value of neuropeptide proenkephalin A in patients with severe traumatic brain injury.	Pubmed	4.74E-04	1.00E+00	9.99E-04	8.90E-03	1	1	PENK
Pubmed	1425680	Solution conformation of human neuropeptide Y by 1H nuclear magnetic resonance and restrained molecular dynamics.	Pubmed	4.74E-04	1.00E+00	9.99E-04	8.90E-03	1	1	NPY
Pubmed	19468819	Gene polymorphisms in prodynorphin (PDYN) are associated with episodic memory in the elderly.	Pubmed	4.74E-04	1.00E+00	9.99E-04	8.90E-03	1	1	PDYN
Pubmed	3963064	Partial purification of relaxin from human seminal plasma.	Pubmed	4.74E-04	1.00E+00	9.99E-04	8.90E-03	1	1	RLN1
Pubmed	18805917	Hypothyroidism in patients with pseudohypoparathyroidism type Ia: clinical evidence of resistance to TSH and TRH.	Pubmed	4.74E-04	1.00E+00	9.99E-04	8.90E-03	1	1	TRH
Pubmed	29311741	Social transmission and buffering of synaptic changes after stress.	Pubmed	4.74E-04	1.00E+00	9.99E-04	8.90E-03	1	1	CRH
Pubmed	26454231	Exploring the association between a cholecystokinin promoter polymorphism (rs1799923) and posttraumatic stress disorder in combat veterans.	Pubmed	4.74E-04	1.00E+00	9.99E-04	8.90E-03	1	1	CCK
Pubmed	17181633	Enhancement of cell migration by corticotropin-releasing hormone through ERK1/2 pathway in murine melanoma cell line, B16F10.	Pubmed	4.74E-04	1.00E+00	9.99E-04	8.90E-03	1	1	CRH
Pubmed	23975326	The effect of submicron fat droplets in a drink on satiety, food intake, and cholecystokinin in healthy volunteers.	Pubmed	4.74E-04	1.00E+00	9.99E-04	8.90E-03	1	1	CCK
Pubmed	18359536	VIP balances innate and adaptive immune responses induced by specific stimulation of TLR2 and TLR4.	Pubmed	4.74E-04	1.00E+00	9.99E-04	8.90E-03	1	1	VIP
Pubmed	8816252	Antinociceptive effects of neuropeptide Y and related peptides in mice.	Pubmed	4.74E-04	1.00E+00	9.99E-04	8.90E-03	1	1	NPY
Pubmed	29466891	Proenkephalin and risk of developing chronic kidney disease: the Prevention of Renal and Vascular End-stage Disease study.	Pubmed	4.74E-04	1.00E+00	9.99E-04	8.90E-03	1	1	PENK
Pubmed	20836873	Facilitation of the inhibitory transmission by gastrin-releasing peptide in the anterior cingulate cortex.	Pubmed	4.74E-04	1.00E+00	9.99E-04	8.90E-03	1	1	GRP
Pubmed	19448152	Nociceptin modulates bronchoconstriction induced by sensory nerve activation in mouse lung.	Pubmed	4.74E-04	1.00E+00	9.99E-04	8.90E-03	1	1	PNOC
Pubmed	2249778	Structure of the mouse gene encoding parathyroid hormone-related peptide.	Pubmed	4.74E-04	1.00E+00	9.99E-04	8.90E-03	1	1	PTHLH
Pubmed	19379831	The corticotropin-releasing factor system in inflammatory bowel disease: prospects for new therapeutic approaches.	Pubmed	4.74E-04	1.00E+00	9.99E-04	8.90E-03	1	1	CRH
Pubmed	22728770	Vasoactive intestinal peptide (VIP) inhibits human renal cell carcinoma proliferation.	Pubmed	4.74E-04	1.00E+00	9.99E-04	8.90E-03	1	1	VIP
Pubmed	17431645	Cellular localization of pituitary adenylate cyclase-activating peptide (PACAP) following traumatic brain injury in humans.	Pubmed	4.74E-04	1.00E+00	9.99E-04	8.90E-03	1	1	ADCYAP1
Pubmed	24066107	Inflammatory mediators influence the expression of nociceptin and its receptor in human whole blood cultures.	Pubmed	4.74E-04	1.00E+00	9.99E-04	8.90E-03	1	1	PNOC
Pubmed	26038607	Raised circulating Neurokinin A predicts prognosis in metastatic small bowel neuroendocrine tumours. Lowering Neurokinin A indicates improved prognosis.	Pubmed	4.74E-04	1.00E+00	9.99E-04	8.90E-03	1	1	TAC1
Pubmed	21712056	Bombesin receptor subtype-3 agonists stimulate the growth of lung cancer cells and increase EGF receptor tyrosine phosphorylation.	Pubmed	4.74E-04	1.00E+00	9.99E-04	8.90E-03	1	1	NMB
Pubmed	23087672	Taltirelin is a superagonist at the human thyrotropin-releasing hormone receptor.	Pubmed	4.74E-04	1.00E+00	9.99E-04	8.90E-03	1	1	TRH
Pubmed	26169942	Elevated mutant dynorphin A causes Purkinje cell loss and motor dysfunction in spinocerebellar ataxia type 23.	Pubmed	4.74E-04	1.00E+00	9.99E-04	8.90E-03	1	1	PDYN
Pubmed	8216305	Mouse relaxin: synthesis and biological activity of the first relaxin with an unusual crosslinking pattern.	Pubmed	4.74E-04	1.00E+00	9.99E-04	8.90E-03	1	1	RLN1
Pubmed	19932736	Mice deficient in pituitary adenylate cyclase activating polypeptide display increased sensitivity to renal oxidative stress in vitro.	Pubmed	4.74E-04	1.00E+00	9.99E-04	8.90E-03	1	1	ADCYAP1
Pubmed	9391077	Opposing mitogenic and anti-mitogenic actions of parathyroid hormone-related protein in vascular smooth muscle cells: a critical role for nuclear targeting.	Pubmed	4.74E-04	1.00E+00	9.99E-04	8.90E-03	1	1	PTHLH
Pubmed	30462698	Antibacterial properties of the pituitary adenylate cyclase-activating polypeptide: A new human antimicrobial peptide.	Pubmed	4.74E-04	1.00E+00	9.99E-04	8.90E-03	1	1	ADCYAP1
Pubmed	22045495	Corticotrophin releasing factor accelerates neuropathology and cognitive decline in a mouse model of Alzheimer's disease.	Pubmed	4.74E-04	1.00E+00	9.99E-04	8.90E-03	1	1	CRH
Pubmed	17099915	Exacerbated loss of cell survival, neuropeptide Y-immunoreactive (IR) cells, and serotonin-IR fiber lengths in the dorsal hippocampus of the aged flinders sensitive line "depressed" rat: Implications for the pathophysiology of depression?	Pubmed	4.74E-04	1.00E+00	9.99E-04	8.90E-03	1	1	NPY
Pubmed	28560510	The role of neurotensin as a novel biomarker in the endoscopic screening of high-risk population for developing colorectal neoplasia.	Pubmed	4.74E-04	1.00E+00	9.99E-04	8.90E-03	1	1	NTS
Pubmed	28786031	Lack of CRH Affects the Behavior but Does Not Affect the Formation of Short-Term Memory.	Pubmed	4.74E-04	1.00E+00	9.99E-04	8.90E-03	1	1	CRH
Pubmed	2938259	Activation of mouse T-helper cells induces abundant preproenkephalin mRNA synthesis.	Pubmed	4.74E-04	1.00E+00	9.99E-04	8.90E-03	1	1	PENK
Pubmed	21628547	Effects of vasoactive intestinal peptide genotype on circadian gene expression in the suprachiasmatic nucleus and peripheral organs.	Pubmed	4.74E-04	1.00E+00	9.99E-04	8.90E-03	1	1	VIP
Pubmed	19486061	Analysis of the prodynorphin promoter polymorphism in atopic dermatitis and disease-related pruritus.	Pubmed	4.74E-04	1.00E+00	9.99E-04	8.90E-03	1	1	PDYN
Pubmed	23380766	Corticotropin-releasing hormone exerts direct effects on neuronal progenitor cells: implications for neuroprotection.	Pubmed	4.74E-04	1.00E+00	9.99E-04	8.90E-03	1	1	CRH
Pubmed	19196798	Chronic intracerebroventricular infusion of nociceptin/orphanin FQ produces body weight gain by affecting both feeding and energy metabolism in mice.	Pubmed	4.74E-04	1.00E+00	9.99E-04	8.90E-03	1	1	PNOC
Pubmed	1283163	Calcitonin gene-related peptide, substance P and GAP-43/B-50 immunoreactivity in the normal and arthrotic knee joint of the mouse.	Pubmed	4.74E-04	1.00E+00	9.99E-04	8.90E-03	1	1	TAC1
Pubmed	12566112	Increased myocardial collagen and ventricular diastolic dysfunction in relaxin deficient mice: a gender-specific phenotype.	Pubmed	4.74E-04	1.00E+00	9.99E-04	8.90E-03	1	1	RLN1
Pubmed	11210195	Multiple obesity QTLs identified in an intercross between the NZO (New Zealand obese) and the SM (small) mouse strains.	Pubmed	4.74E-04	1.00E+00	9.99E-04	8.90E-03	1	1	NPY
Pubmed	11103933	A cancer modifier role for parathyroid hormone-related protein.	Pubmed	4.74E-04	1.00E+00	9.99E-04	8.90E-03	1	1	PTHLH
Pubmed	18276767	Transgenic mice overexpressing neuropeptide Y in noradrenergic neurons: a novel model of increased adiposity and impaired glucose tolerance.	Pubmed	4.74E-04	1.00E+00	9.99E-04	8.90E-03	1	1	NPY
Pubmed	28636114	SET/I2PP2A overexpression induces phenotypic, molecular, and metabolic alterations in an oral keratinocyte cell line.	Pubmed	4.74E-04	1.00E+00	9.99E-04	8.90E-03	1	1	SET
Pubmed	11912133	Neurotensin induces protein kinase C-dependent protein kinase D activation and DNA synthesis in human pancreatic carcinoma cell line PANC-1.	Pubmed	4.74E-04	1.00E+00	9.99E-04	8.90E-03	1	1	NTS
Pubmed	28472856	Multiple cell types form the VIP amacrine cell population.	Pubmed	4.74E-04	1.00E+00	9.99E-04	8.90E-03	1	1	VIP
Pubmed	18396340	Effects of mid-jejunal compared to duodenal glucose infusion on peptide hormone release and appetite in healthy men.	Pubmed	4.74E-04	1.00E+00	9.99E-04	8.90E-03	1	1	CCK
Pubmed	12670727	Serum levels of vasoactive intestinal peptide are elevated in patients with atopic dermatitis.	Pubmed	4.74E-04	1.00E+00	9.99E-04	8.90E-03	1	1	VIP
Pubmed	20176081	Neurokinin B signaling in puberty: human and animal studies.	Pubmed	4.74E-04	1.00E+00	9.99E-04	8.90E-03	1	1	TAC3
Pubmed	22613736	Cholecystokinin knock-down in the basolateral amygdala has anxiolytic and antidepressant-like effects in mice.	Pubmed	4.74E-04	1.00E+00	9.99E-04	8.90E-03	1	1	CCK
Pubmed	19046386	Paucity of enkephalin production in neostriatal striosomal neurons: analysis with preproenkephalin-green fluorescent protein transgenic mice.	Pubmed	4.74E-04	1.00E+00	9.99E-04	8.90E-03	1	1	PENK
Pubmed	16687279	PACAP--a multifacetted neuropeptide.	Pubmed	4.74E-04	1.00E+00	9.99E-04	8.90E-03	1	1	ADCYAP1
Pubmed	25402857	VTA CRF neurons mediate the aversive effects of nicotine withdrawal and promote intake escalation.	Pubmed	4.74E-04	1.00E+00	9.99E-04	8.90E-03	1	1	CRH
Pubmed	11914577	Effects of prolactin-releasing peptide on tuberoinfundibular dopaminergic neuronal activity and prolactin secretion in estrogen-treated female rats.	Pubmed	4.74E-04	1.00E+00	9.99E-04	8.90E-03	1	1	TRH
Pubmed	20036221	Cholecystokinin: role in thermoregulation and other aspects of energetics.	Pubmed	4.74E-04	1.00E+00	9.99E-04	8.90E-03	1	1	CCK
Pubmed	8858927	Initial processing of human proenkephalin in bovine chromaffin cells.	Pubmed	4.74E-04	1.00E+00	9.99E-04	8.90E-03	1	1	PENK
Pubmed	19135490	Sympathetic nervous system-targeted neuropeptide Y overexpression in mice enhances neointimal formation in response to vascular injury.	Pubmed	4.74E-04	1.00E+00	9.99E-04	8.90E-03	1	1	NPY
Pubmed	8161822	Structural organization of the 5' flanking region of the human corticotropin releasing hormone gene.	Pubmed	4.74E-04	1.00E+00	9.99E-04	8.90E-03	1	1	CRH
Pubmed	19403857	Diet-derived nutrients mediate the inhibition of hypothalamic NPY neurons in the arcuate nucleus of mice during refeeding.	Pubmed	4.74E-04	1.00E+00	9.99E-04	8.90E-03	1	1	NPY
Pubmed	23122776	Neuropeptide Y polymorphism increases the risk for asthma in overweight subjects; protection from atherosclerosis in asthmatic subjects--the cardiovascular risk in young Finns study.	Pubmed	4.74E-04	1.00E+00	9.99E-04	8.90E-03	1	1	NPY
Pubmed	8710928	Structure, tissue distribution, and chromosomal localization of the prepronociceptin gene.	Pubmed	4.74E-04	1.00E+00	9.99E-04	8.90E-03	1	1	PNOC
Pubmed	12933656	Monosodium glutamate-sensitive hypothalamic neurons contribute to the control of bone mass.	Pubmed	4.74E-04	1.00E+00	9.99E-04	8.90E-03	1	1	NPY
Pubmed	2302217	A novel peptide which stimulates adenylate cyclase: molecular cloning and characterization of the ovine and human cDNAs.	Pubmed	4.74E-04	1.00E+00	9.99E-04	8.90E-03	1	1	ADCYAP1
Pubmed	28912247	miR-212 mediates counter-regulation on CRH expression and HPA axis activity in male mice.	Pubmed	4.74E-04	1.00E+00	9.99E-04	8.90E-03	1	1	CRH
Pubmed	27260403	Altered secondary structure of Dynorphin A associates with loss of opioid signalling and NMDA-mediated excitotoxicity in SCA23.	Pubmed	4.74E-04	1.00E+00	9.99E-04	8.90E-03	1	1	PDYN
Pubmed	21732369	Parathyroid hormone-related protein is a hypertrophy factor for human mesangial cells: Implications for diabetic nephropathy.	Pubmed	4.74E-04	1.00E+00	9.99E-04	8.90E-03	1	1	PTHLH
Pubmed	18423945	Regardless of genotype, offspring of VIP-deficient female mice exhibit developmental delays and deficits in social behavior.	Pubmed	4.74E-04	1.00E+00	9.99E-04	8.90E-03	1	1	VIP
Pubmed	11290742	Sturgeon orphanin, a molecular "fossil" that bridges the gap between the opioids and orphanin FQ/nociceptin.	Pubmed	4.74E-04	1.00E+00	9.99E-04	8.90E-03	1	1	PNOC
Pubmed	29391448	Vasoactive intestinal peptide gene polymorphisms, associated with its serum levels, predict treatment requirements in early rheumatoid arthritis.	Pubmed	4.74E-04	1.00E+00	9.99E-04	8.90E-03	1	1	VIP
Pubmed	16952405	Bone marrow derived mast cell acquire responsiveness to substance P with Ca(2+) signals and release of leukotriene B(4) via mitogen-activated protein kinase.	Pubmed	4.74E-04	1.00E+00	9.99E-04	8.90E-03	1	1	TAC1
Pubmed	28523979	PACAP Promotes Matrix-Driven Adhesion of Cultured Adult Murine Neural Progenitors.	Pubmed	4.74E-04	1.00E+00	9.99E-04	8.90E-03	1	1	ADCYAP1
Pubmed	8641188	Effect of endogenously produced parathyroid hormone-related peptide on growth of a human hepatoma cell line (Hep G2).	Pubmed	4.74E-04	1.00E+00	9.99E-04	8.90E-03	1	1	PTHLH
Pubmed	9346823	Synthesis and characterization of human gene 1 relaxin peptides.	Pubmed	4.74E-04	1.00E+00	9.99E-04	8.90E-03	1	1	RLN1
Pubmed	16182561	Cortistatin overexpression in transgenic mice produces deficits in synaptic plasticity and learning.	Pubmed	4.74E-04	1.00E+00	9.99E-04	8.90E-03	1	1	CORT
Pubmed	19150389	No association between a functional polymorphism in the promoter region of the neuropeptide Y gene (-485C>T) and schizophrenia.	Pubmed	4.74E-04	1.00E+00	9.99E-04	8.90E-03	1	1	NPY
Pubmed	21542221	[Relationship between cholecystokinin gene -45C/T polymorphism and schizophrenia and its application in forensic medicine].	Pubmed	4.74E-04	1.00E+00	9.99E-04	8.90E-03	1	1	CCK
Pubmed	14675801	Association of a genetic marker at the corticotropin-releasing hormone locus with behavioral inhibition.	Pubmed	4.74E-04	1.00E+00	9.99E-04	8.90E-03	1	1	CRH
Pubmed	24302625	An N-ethyl-N-nitrosourea induced corticotropin-releasing hormone promoter mutation provides a mouse model for endogenous glucocorticoid excess.	Pubmed	4.74E-04	1.00E+00	9.99E-04	8.90E-03	1	1	CRH
Pubmed	21926539	Validation of neurokinin a assays in the United States and Europe.	Pubmed	4.74E-04	1.00E+00	9.99E-04	8.90E-03	1	1	TAC1
Pubmed	22508574	Transcriptomic and proteomic analyses in bone tumor cells: Deciphering parathyroid hormone-related protein regulation of the cell cycle and apoptosis.	Pubmed	4.74E-04	1.00E+00	9.99E-04	8.90E-03	1	1	PTHLH
Pubmed	12225892	Novel orphanin FQ/nociceptin transcripts are expressed in human immune cells.	Pubmed	4.74E-04	1.00E+00	9.99E-04	8.90E-03	1	1	PNOC
Pubmed	25716007	Structure activity studies of nociceptin/orphanin FQ(1-13)-NH2 derivatives modified in position 5.	Pubmed	4.74E-04	1.00E+00	9.99E-04	8.90E-03	1	1	PNOC
Pubmed	27750083	Substance-P alleviates dextran sulfate sodium-induced intestinal damage by suppressing inflammation through enrichment of M2 macrophages and regulatory T cells.	Pubmed	4.74E-04	1.00E+00	9.99E-04	8.90E-03	1	1	TAC1
Pubmed	27559040	Association study of two functional single nucleotide polymorphisms of neuropeptide y gene with multiple sclerosis.	Pubmed	4.74E-04	1.00E+00	9.99E-04	8.90E-03	1	1	NPY
Pubmed	27957625	A genome-wide analysis in cluster headache points to neprilysin and PACAP receptor gene variants.	Pubmed	4.74E-04	1.00E+00	9.99E-04	8.90E-03	1	1	ADCYAP1
Pubmed	21383633	Renoprotection with pituitary adenylate cyclase-activating polypeptide in cyclosporine A-induced nephrotoxicity.	Pubmed	4.74E-04	1.00E+00	9.99E-04	8.90E-03	1	1	ADCYAP1
Pubmed	2885845	Parathyroid hormone-related protein purified from a human lung cancer cell line.	Pubmed	4.74E-04	1.00E+00	9.99E-04	8.90E-03	1	1	PTHLH
Pubmed	16184603	Confirmation of the association between a polymorphism in the promoter region of the prodynorphin gene and cocaine dependence.	Pubmed	4.74E-04	1.00E+00	9.99E-04	8.90E-03	1	1	PDYN
Pubmed	12409213	Defects in reproductive functions in PACAP-deficient female mice.	Pubmed	4.74E-04	1.00E+00	9.99E-04	8.90E-03	1	1	ADCYAP1
Pubmed	25056115	PACAP is essential for the adaptive thermogenic response of brown adipose tissue to cold exposure.	Pubmed	4.74E-04	1.00E+00	9.99E-04	8.90E-03	1	1	ADCYAP1
Pubmed	9409745	Comparison of the structure-activity relationships of nociceptin and dynorphin A using chimeric peptides.	Pubmed	4.74E-04	1.00E+00	9.99E-04	8.90E-03	1	1	PNOC
Pubmed	22925217	Promotional effects of vasoactive intestinal peptide on the development of rodent Hertwig's epithelial root sheath.	Pubmed	4.74E-04	1.00E+00	9.99E-04	8.90E-03	1	1	VIP
Pubmed	9846828	Identification of a delta isoform of preprotachykinin mRNA in human mononuclear phagocytes and lymphocytes.	Pubmed	4.74E-04	1.00E+00	9.99E-04	8.90E-03	1	1	TAC1
Pubmed	18523300	The neuropeptide substance P is a critical mediator of burn-induced acute lung injury.	Pubmed	4.74E-04	1.00E+00	9.99E-04	8.90E-03	1	1	TAC1
Pubmed	17516289	Impact of the Leu7Pro polymorphism of preproNPY on diurnal NPY and hormone secretion in type 2 diabetes.	Pubmed	4.74E-04	1.00E+00	9.99E-04	8.90E-03	1	1	NPY
Pubmed	25889720	Human mesenchymal stem/stromal cells suppress spinal inflammation in mice with contribution of pituitary adenylate cyclase-activating polypeptide (PACAP).	Pubmed	4.74E-04	1.00E+00	9.99E-04	8.90E-03	1	1	ADCYAP1
Pubmed	15153465	Cutting edge: hemokinin has substance P-like function and expression in inflammation.	Pubmed	4.74E-04	1.00E+00	9.99E-04	8.90E-03	1	1	TAC1
Pubmed	18082911	Proenkephalin expression and enkephalin release are widely observed in non-neuronal tissues.	Pubmed	4.74E-04	1.00E+00	9.99E-04	8.90E-03	1	1	PENK
Pubmed	17804556	Decrease in binding for the neuropeptide VIP in response to marked inflammation of the mucosa in ulcerative colitis.	Pubmed	4.74E-04	1.00E+00	9.99E-04	8.90E-03	1	1	VIP
Pubmed	19889985	Deciphering the interaction of the corticotropin-releasing factor and serotonin brain systems in anxiety-related disorders.	Pubmed	4.74E-04	1.00E+00	9.99E-04	8.90E-03	1	1	CRH
Pubmed	7816190	Identification of thyrotropin-releasing hormone receptor in the rat testis.	Pubmed	4.74E-04	1.00E+00	9.99E-04	8.90E-03	1	1	TRH
Pubmed	16519961	Proneurotensin 1-117, a stable neurotensin precursor fragment identified in human circulation.	Pubmed	4.74E-04	1.00E+00	9.99E-04	8.90E-03	1	1	NTS
Pubmed	10490631	Sperm chromatin decondensation by template activating factor I through direct interaction with basic proteins.	Pubmed	4.74E-04	1.00E+00	9.99E-04	8.90E-03	1	1	SET
Pubmed	7057924	Primary structure of the human Met- and Leu-enkephalin precursor and its mRNA.	Pubmed	4.74E-04	1.00E+00	9.99E-04	8.90E-03	1	1	PENK
Pubmed	22308535	Neuropeptide Y Leu7Pro polymorphism associated with the metabolic syndrome and its features in patients with coronary artery disease.	Pubmed	4.74E-04	1.00E+00	9.99E-04	8.90E-03	1	1	NPY
Pubmed	18446003	Markedly reduced white adipose tissue and increased insulin sensitivity in adcyap1-deficient mice.	Pubmed	4.74E-04	1.00E+00	9.99E-04	8.90E-03	1	1	ADCYAP1
Pubmed	17376622	Tachykinin 1 (TAC1) gene SNPs and haplotypes with autism: a case-control study.	Pubmed	4.74E-04	1.00E+00	9.99E-04	8.90E-03	1	1	TAC1
Pubmed	14628185	Distribution of the NPY 1128C allele frequency in different populations.	Pubmed	4.74E-04	1.00E+00	9.99E-04	8.90E-03	1	1	NPY
Pubmed	22790219	Structure-function relationship of the nuclear localization signal sequence of parathyroid hormone-related protein.	Pubmed	4.74E-04	1.00E+00	9.99E-04	8.90E-03	1	1	PTHLH
Pubmed	12065614	Cocaine treatment increases extracellular cholecystokinin (CCK) in the nucleus accumbens shell of awake, freely moving rats, an effect that is enhanced in rats that are behaviorally sensitized to cocaine.	Pubmed	4.74E-04	1.00E+00	9.99E-04	8.90E-03	1	1	CCK
Pubmed	15956691	Mechanisms of relaxin action in the reproductive tract: studies in the relaxin-deficient (Rlx-/-) mouse.	Pubmed	4.74E-04	1.00E+00	9.99E-04	8.90E-03	1	1	RLN1
Pubmed	20083850	Modulation of corticotropin releasing factor (CRF) signaling through receptor splicing in mouse pituitary cell line AtT-20--emerging role of soluble isoforms.	Pubmed	4.74E-04	1.00E+00	9.99E-04	8.90E-03	1	1	CRH
Pubmed	18291538	Calorie restriction alters physical performance but not cognition in two models of altered neuroendocrine signaling.	Pubmed	4.74E-04	1.00E+00	9.99E-04	8.90E-03	1	1	NPY
Pubmed	27238620	Amygdala-Dependent Molecular Mechanisms of the Tac2 Pathway in Fear Learning.	Pubmed	4.74E-04	1.00E+00	9.99E-04	8.90E-03	1	1	TAC3
Pubmed	22056386	PTHrP drives breast tumor initiation, progression, and metastasis in mice and is a potential therapy target.	Pubmed	4.74E-04	1.00E+00	9.99E-04	8.90E-03	1	1	PTHLH
Pubmed	24587148	A genetic polymorphism of the endogenous opioid dynorphin modulates monetary reward anticipation in the corticostriatal loop.	Pubmed	4.74E-04	1.00E+00	9.99E-04	8.90E-03	1	1	PDYN
Pubmed	6139527	Diarrhoea in vipoma patients associated with cosecretion of a second active peptide (peptide histidine isoleucine) explained by single coding gene.	Pubmed	4.74E-04	1.00E+00	9.99E-04	8.90E-03	1	1	VIP
Pubmed	26420784	Characterizing VIP Neurons in the Barrel Cortex of VIPcre/tdTomato Mice Reveals Layer-Specific Differences.	Pubmed	4.74E-04	1.00E+00	9.99E-04	8.90E-03	1	1	VIP
Pubmed	22448974	Involvement of parathyroid hormone-related protein in vascular calcification of chronic haemodialysis patients.	Pubmed	4.74E-04	1.00E+00	9.99E-04	8.90E-03	1	1	PTHLH
Pubmed	14960619	Selective ablation of a class of amacrine cells alters spatial processing in the retina.	Pubmed	4.74E-04	1.00E+00	9.99E-04	8.90E-03	1	1	NPY
Pubmed	21922516	Epigenetic control of somatostatin and cortistatin expression by ? amyloid peptide.	Pubmed	4.74E-04	1.00E+00	9.99E-04	8.90E-03	1	1	CORT
Pubmed	12644935	Examination of sequence homology between human chromosome 20 and the mouse genome: intense conservation of many genomic elements.	Pubmed	4.74E-04	1.00E+00	9.99E-04	8.90E-03	1	1	PDYN
Pubmed	30121362	Cardiac procholecystokinin expression during haemodynamic changes in the mammalian heart.	Pubmed	4.74E-04	1.00E+00	9.99E-04	8.90E-03	1	1	CCK
Pubmed	18329096	Monoaminergic compensation in the neuropeptide Y deficient mouse brain.	Pubmed	4.74E-04	1.00E+00	9.99E-04	8.90E-03	1	1	NPY
Pubmed	10657515	Role of bombesin-related peptides in the control of food intake.	Pubmed	4.74E-04	1.00E+00	9.99E-04	8.90E-03	1	1	GRP
Pubmed	16420432	Paradoxical effects of prodynorphin gene deletion on basal and cocaine-evoked dopaminergic neurotransmission in the nucleus accumbens.	Pubmed	4.74E-04	1.00E+00	9.99E-04	8.90E-03	1	1	PDYN
Pubmed	23101464	Association of the PDYN gene with alcohol dependence and the propensity to drink in negative emotional states.	Pubmed	4.74E-04	1.00E+00	9.99E-04	8.90E-03	1	1	PDYN
Pubmed	14597768	Mammary-specific deletion of parathyroid hormone-related protein preserves bone mass during lactation.	Pubmed	4.74E-04	1.00E+00	9.99E-04	8.90E-03	1	1	PTHLH
Pubmed	10380976	Identification of human, rat and mouse nocistatin in brain and human nocistatin in brain and human cerebrospinal fluid.	Pubmed	4.74E-04	1.00E+00	9.99E-04	8.90E-03	1	1	PNOC
Pubmed	16314761	A functional prodynorphin promoter polymorphism and opioid dependence.	Pubmed	4.74E-04	1.00E+00	9.99E-04	8.90E-03	1	1	PDYN
Pubmed	10096039	Molecular mapping of epitopes involved in ligand activation of the human receptor for the neuropeptide, VIP, based on hybrids with the human secretin receptor.	Pubmed	4.74E-04	1.00E+00	9.99E-04	8.90E-03	1	1	VIP
Pubmed	28230031	Serum pro-gastrin-releasing peptide in diagnosis of small cell lung cancer: A meta-analysis.	Pubmed	4.74E-04	1.00E+00	9.99E-04	8.90E-03	1	1	GRP
Pubmed	17430174	PACAP in the glucose and energy homeostasis: physiological role and therapeutic potential.	Pubmed	4.74E-04	1.00E+00	9.99E-04	8.90E-03	1	1	ADCYAP1
Pubmed	23962427	Effects of differentiation on purinergic and neurotensin-mediated calcium signaling in human HT-29 colon cancer cells.	Pubmed	4.74E-04	1.00E+00	9.99E-04	8.90E-03	1	1	NTS
Pubmed	24563019	Increased substance P expression in the trochanteric bursa of patients with greater trochanteric pain syndrome.	Pubmed	4.74E-04	1.00E+00	9.99E-04	8.90E-03	1	1	TAC1
Pubmed	21956127	Thyrotropin-releasing hormone selectively stimulates human hair follicle pigmentation.	Pubmed	4.74E-04	1.00E+00	9.99E-04	8.90E-03	1	1	TRH
Pubmed	22533365	Aging-related changes in cutaneous corticotropin-releasing hormone system reflect a defective neuroendocrine-stress response in aging.	Pubmed	4.74E-04	1.00E+00	9.99E-04	8.90E-03	1	1	CRH
Pubmed	7704423	Expression of corticotropin-releasing hormone transgenes in neurons of adult and developing mice.	Pubmed	4.74E-04	1.00E+00	9.99E-04	8.90E-03	1	1	CRH
Pubmed	23500093	PACAP deficiency sensitizes nigrostriatal dopaminergic neurons to paraquat-induced damage and modulates central and peripheral inflammatory activation in mice.	Pubmed	4.74E-04	1.00E+00	9.99E-04	8.90E-03	1	1	ADCYAP1
Pubmed	23466453	Parathyroid hormone-related protein (PTHrP) modulates adhesion, migration and invasion in bone tumor cells.	Pubmed	4.74E-04	1.00E+00	9.99E-04	8.90E-03	1	1	PTHLH
Pubmed	15155712	Mechanisms of vasoactive intestinal peptide-mediated vasodilation in human skin.	Pubmed	4.74E-04	1.00E+00	9.99E-04	8.90E-03	1	1	VIP
Pubmed	17208296	Diurnal and seasonal variation of cholecystokinin peptides in humans.	Pubmed	4.74E-04	1.00E+00	9.99E-04	8.90E-03	1	1	CCK
Pubmed	20170896	Deletion and point mutations of PTHLH cause brachydactyly type E.	Pubmed	4.74E-04	1.00E+00	9.99E-04	8.90E-03	1	1	PTHLH
Pubmed	17608644	The nuclear localization of SET mediated by impalpha3/impbeta attenuates its cytosolic toxicity in neurons.	Pubmed	4.74E-04	1.00E+00	9.99E-04	8.90E-03	1	1	SET
Pubmed	2747658	Rat parathyroid hormone-like peptide: comparison with the human homologue and expression in malignant and normal tissue.	Pubmed	4.74E-04	1.00E+00	9.99E-04	8.90E-03	1	1	PTHLH
Pubmed	17554476	Allelic variation in the NPY gene in 14 Indian populations.	Pubmed	4.74E-04	1.00E+00	9.99E-04	8.90E-03	1	1	NPY
Pubmed	15956701	Recombinant human relaxin (rhRLX) modifies systemic arterial properties in conscious rats irrespective of gender, but in a biphasic fashion.	Pubmed	4.74E-04	1.00E+00	9.99E-04	8.90E-03	1	1	RLN1
Pubmed	12409225	PACAP-27 tyrosine phosphorylates mitogen activated protein kinase and increases VEGF mRNAs in human lung cancer cells.	Pubmed	4.74E-04	1.00E+00	9.99E-04	8.90E-03	1	1	ADCYAP1
Pubmed	8663129	Molecular cloning and characterization of a novel form of neuropeptide gene as a developmentally regulated molecule.	Pubmed	4.74E-04	1.00E+00	9.99E-04	8.90E-03	1	1	PNOC
Pubmed	10328987	Animal models of CRH deficiency.	Pubmed	4.74E-04	1.00E+00	9.99E-04	8.90E-03	1	1	CRH
Pubmed	10998544	Nocistatin: a novel neuropeptide encoded by the gene for the nociceptin/orphanin FQ precursor.	Pubmed	4.74E-04	1.00E+00	9.99E-04	8.90E-03	1	1	PNOC
Pubmed	20010906	Influence of maternal educational level on the association between the rs3809508 neuromedin B gene polymorphism and the risk of obesity in the HELENA study.	Pubmed	4.74E-04	1.00E+00	9.99E-04	8.90E-03	1	1	NMB
Pubmed	27836688	Pathologic significance of SET/I2PP2A-mediated PP2A and non-PP2A pathways in polycystic ovary syndrome (PCOS).	Pubmed	4.74E-04	1.00E+00	9.99E-04	8.90E-03	1	1	SET
Pubmed	17494790	Relationship between serum substance P levels and daytime sleepiness in obstructive sleep apnea syndrome.	Pubmed	4.74E-04	1.00E+00	9.99E-04	8.90E-03	1	1	TAC1
Pubmed	27312221	Circulating Proneurotensin Concentrations and Cardiovascular Disease Events in the Community: The Framingham Heart Study.	Pubmed	4.74E-04	1.00E+00	9.99E-04	8.90E-03	1	1	NTS
Pubmed	19120039	Sudden infant death syndrome (SIDS) in African Americans: polymorphisms in the gene encoding the stress peptide pituitary adenylate cyclase-activating polypeptide (PACAP).	Pubmed	4.74E-04	1.00E+00	9.99E-04	8.90E-03	1	1	ADCYAP1
Pubmed	22326386	Corticotropin releasing factor (CRF) in the hippocampus of the mouse pilocarpine model of status epilepticus.	Pubmed	4.74E-04	1.00E+00	9.99E-04	8.90E-03	1	1	CRH
Pubmed	19616583	Nuclear PTHrP targeting regulates PTHrP secretion and enhances LoVo cell growth and survival.	Pubmed	4.74E-04	1.00E+00	9.99E-04	8.90E-03	1	1	PTHLH
Pubmed	11891769	Fibroblast growth factor-2 converts PACAP growth action on embryonic hindbrain precursors from stimulation to inhibition.	Pubmed	4.74E-04	1.00E+00	9.99E-04	8.90E-03	1	1	ADCYAP1
Pubmed	27475101	Release of PACAP-38 in episodic cluster headache patients - an exploratory study.	Pubmed	4.74E-04	1.00E+00	9.99E-04	8.90E-03	1	1	ADCYAP1
Pubmed	25821833	Pituitary adenylate cyclase-activating polypeptide protects glomerular podocytes from inflammatory injuries.	Pubmed	4.74E-04	1.00E+00	9.99E-04	8.90E-03	1	1	ADCYAP1
Pubmed	3582983	Structure of human cholecystokinin gene and its chromosomal location.	Pubmed	4.74E-04	1.00E+00	9.99E-04	8.90E-03	1	1	CCK
Pubmed	18720023	Altered renal morphology in transgenic mice with cholecystokinin overexpression.	Pubmed	4.74E-04	1.00E+00	9.99E-04	8.90E-03	1	1	CCK
Pubmed	21415235	An elevated progastrin-releasing peptide level in patients with well-differentiated neuroendocrine tumours indicates a primary tumour in the lung and predicts a shorter survival.	Pubmed	4.74E-04	1.00E+00	9.99E-04	8.90E-03	1	1	GRP
Pubmed	12705477	Detection of substance P and its mRNA in human blast cells in childhood lymphoblastic leukaemia using immunocytochemistry and in situ hybridisation.	Pubmed	4.74E-04	1.00E+00	9.99E-04	8.90E-03	1	1	TAC1
Pubmed	3202886	Chromosomal assignment of human VIP/PHM-27 gene to 6q26----q27 region by spot blot hybridization and in situ hybridization.	Pubmed	4.74E-04	1.00E+00	9.99E-04	8.90E-03	1	1	VIP
Pubmed	15225659	Thyroid status co-regulates thyroid hormone receptor and co-modulator genes specifically in the hypothalamus.	Pubmed	4.74E-04	1.00E+00	9.99E-04	8.90E-03	1	1	TRH
Pubmed	10098521	Reduced blood pressure and increased sensitivity of the vasculature to parathyroid hormone-related protein (PTHrP) in transgenic mice overexpressing the PTH/PTHrP receptor in vascular smooth muscle.	Pubmed	4.74E-04	1.00E+00	9.99E-04	8.90E-03	1	1	PTHLH
Pubmed	22750277	Neuropeptide Y potentiates beta-adrenergic stimulation of lipolysis in 3T3-L1 adipocytes.	Pubmed	4.74E-04	1.00E+00	9.99E-04	8.90E-03	1	1	NPY
Pubmed	19245788	The role of non-synonymous NPY gene polymorphism in the nitric oxide production in HUVECs.	Pubmed	4.74E-04	1.00E+00	9.99E-04	8.90E-03	1	1	NPY
Pubmed	18695921	Oral squamous cell carcinomas stimulate osteoclast differentiation.	Pubmed	4.74E-04	1.00E+00	9.99E-04	8.90E-03	1	1	PTHLH
Pubmed	20047160	Neurobiological mechanisms of addiction: focus on corticotropin-releasing factor.	Pubmed	4.74E-04	1.00E+00	9.99E-04	8.90E-03	1	1	CRH
Pubmed	24901518	Progastrin represses the alternative activation of human macrophages and modulates their influence on colon cancer epithelial cells.	Pubmed	4.74E-04	1.00E+00	9.99E-04	8.90E-03	1	1	GRP
Pubmed	11796511	GH-releasing peptide-2 increases fat mass in mice lacking NPY: indication for a crucial mediating role of hypothalamic agouti-related protein.	Pubmed	4.74E-04	1.00E+00	9.99E-04	8.90E-03	1	1	NPY
Pubmed	21664243	1,25-Dihydroxyvitamin D(3) regulates PTHrP expression via transcriptional, post-transcriptional and post-translational pathways.	Pubmed	4.74E-04	1.00E+00	9.99E-04	8.90E-03	1	1	PTHLH
Pubmed	15301734	Polymorphism of Prodynorphin promoter is associated with schizophrenia in Chinese population.	Pubmed	4.74E-04	1.00E+00	9.99E-04	8.90E-03	1	1	PDYN
Pubmed	6547364	Ontogeny of a novel peptide, neuropeptide Y (NPY) in rat brain.	Pubmed	4.74E-04	1.00E+00	9.99E-04	8.90E-03	1	1	NPY
Pubmed	14764456	Over-expression of gastrin-releasing peptide in human esophageal squamous cell carcinomas.	Pubmed	4.74E-04	1.00E+00	9.99E-04	8.90E-03	1	1	GRP
Pubmed	20174586	PACAP-deficient mice exhibit light parameter-dependent abnormalities on nonvisual photoreception and early activity onset.	Pubmed	4.74E-04	1.00E+00	9.99E-04	8.90E-03	1	1	ADCYAP1
Pubmed	22103391	Vasoactive Intestinal Peptide Knockout (VIP KO) mouse model of sulfite-sensitive asthma: up-regulation of novel lung carbonyl reductase.	Pubmed	4.74E-04	1.00E+00	9.99E-04	8.90E-03	1	1	VIP
Pubmed	12128158	Elevated plasma nociceptin level in patients with Wilson disease.	Pubmed	4.74E-04	1.00E+00	9.99E-04	8.90E-03	1	1	PNOC
Pubmed	26220979	Neuropeptide Y mitigates neuropathology and motor deficits in mouse models of Machado-Joseph disease.	Pubmed	4.74E-04	1.00E+00	9.99E-04	8.90E-03	1	1	NPY
Pubmed	12761277	PACAP is present in the olfactory system and evokes calcium transients in olfactory receptor neurons.	Pubmed	4.74E-04	1.00E+00	9.99E-04	8.90E-03	1	1	ADCYAP1
Pubmed	7791794	Characterization of promoter elements required for cell-specific expression of the neurotensin/neuromedin N gene in a human endocrine cell line.	Pubmed	4.74E-04	1.00E+00	9.99E-04	8.90E-03	1	1	NTS
Pubmed	18420205	Neuropeptide Y expression in vaginal epithelium of women with pelvic organ prolapse and stress urinary incontinence.	Pubmed	4.74E-04	1.00E+00	9.99E-04	8.90E-03	1	1	NPY
Pubmed	23994577	Therapeutic concentrations of valproate but not amitriptyline increase neuropeptide Y (NPY) expression in the human SH-SY5Y neuroblastoma cell line.	Pubmed	4.74E-04	1.00E+00	9.99E-04	8.90E-03	1	1	NPY
Pubmed	12114295	Corticotropin-releasing factor modulates cardiovascular and pupillary autonomic reflexes in man: is there a link to inflammation-induced autonomic nervous hyperreflexia?	Pubmed	4.74E-04	1.00E+00	9.99E-04	8.90E-03	1	1	CRH
Pubmed	16816831	Substance P plasma concentration during the LH preovulatory surge of the menstrual cycle in the human.	Pubmed	4.74E-04	1.00E+00	9.99E-04	8.90E-03	1	1	TAC1
Pubmed	10025089	Plasma levels on nociceptin in female fibromyalgia syndrome patients.	Pubmed	4.74E-04	1.00E+00	9.99E-04	8.90E-03	1	1	PNOC
Pubmed	18641693	Interactions of multiple signaling pathways in neuropeptide Y-mediated bimodal vascular smooth muscle cell growth.	Pubmed	4.74E-04	1.00E+00	9.99E-04	8.90E-03	1	1	NPY
Pubmed	16500360	Different plasma neuropeptide Y concentrations in women athletes with and without menstrual cyclicity.	Pubmed	4.74E-04	1.00E+00	9.99E-04	8.90E-03	1	1	NPY
Pubmed	15843539	Corticotropin-releasing hormone contributes to the peripheral inflammatory response in experimental autoimmune encephalomyelitis.	Pubmed	4.74E-04	1.00E+00	9.99E-04	8.90E-03	1	1	CRH
Pubmed	25098665	Neurotensin, a novel target of Wnt/?-catenin pathway, promotes growth of neuroendocrine tumor cells.	Pubmed	4.74E-04	1.00E+00	9.99E-04	8.90E-03	1	1	NTS
Pubmed	20890111	Combinatorial library discovery of small molecule inhibitors of lung cancer proliferation and parathyroid hormone-related protein expression.	Pubmed	4.74E-04	1.00E+00	9.99E-04	8.90E-03	1	1	PTHLH
Pubmed	25427865	Lack of an association between a functional polymorphism in the neuropeptide Y gene promoter and the presence of coronary artery disease in an Iranian population.	Pubmed	4.74E-04	1.00E+00	9.99E-04	8.90E-03	1	1	NPY
Pubmed	17332474	Enhancement of intragastric acid stability of a fat emulsion meal delays gastric emptying and increases cholecystokinin release and gallbladder contraction.	Pubmed	4.74E-04	1.00E+00	9.99E-04	8.90E-03	1	1	CCK
Pubmed	23374587	Ser9 phosphorylation causes cytoplasmic detention of I2PP2A/SET in Alzheimer disease.	Pubmed	4.74E-04	1.00E+00	9.99E-04	8.90E-03	1	1	SET
Pubmed	27084212	Genetic substrates of psychosis in patients with Parkinson's disease: A critical review.	Pubmed	4.74E-04	1.00E+00	9.99E-04	8.90E-03	1	1	CCK
Pubmed	21605612	Pituitary adenylate cyclase-activating polypeptide plays an anti-inflammatory role in endotoxin-induced airway inflammation: in vivo study with gene-deleted mice.	Pubmed	4.74E-04	1.00E+00	9.99E-04	8.90E-03	1	1	ADCYAP1
Pubmed	25451330	The effect of neuropeptide Y on brown-like adipocyte's differentiation and activation.	Pubmed	4.74E-04	1.00E+00	9.99E-04	8.90E-03	1	1	NPY
Pubmed	22399443	Characteristics and clinical validity of two immunoassays for ProGRP.	Pubmed	4.74E-04	1.00E+00	9.99E-04	8.90E-03	1	1	GRP
Pubmed	18729185	Tumor expressed PTHrP facilitates prostate cancer-induced osteoblastic lesions.	Pubmed	4.74E-04	1.00E+00	9.99E-04	8.90E-03	1	1	PTHLH
Pubmed	20211688	Differential regulation of hypothalamic neuropeptide Y hnRNA and mRNA during psychological stress and insulin-induced hypoglycemia.	Pubmed	4.74E-04	1.00E+00	9.99E-04	8.90E-03	1	1	NPY
Pubmed	15922052	Prodynorphin knockout mice demonstrate diminished age-associated impairment in spatial water maze performance.	Pubmed	4.74E-04	1.00E+00	9.99E-04	8.90E-03	1	1	PDYN
Pubmed	15797951	The Leu7Pro polymorphism of preproNPY is associated with decreased insulin secretion, delayed ghrelin suppression, and increased cardiovascular responsiveness to norepinephrine during oral glucose tolerance test.	Pubmed	4.74E-04	1.00E+00	9.99E-04	8.90E-03	1	1	NPY
Pubmed	25048760	Association between VNTR polymorphism in promoter region of prodynorphin (PDYN) gene and heroin dependence.	Pubmed	4.74E-04	1.00E+00	9.99E-04	8.90E-03	1	1	PDYN
Pubmed	19825978	Thyrotropin releasing hormone (TRH): a new player in human hair-growth control.	Pubmed	4.74E-04	1.00E+00	9.99E-04	8.90E-03	1	1	TRH
Pubmed	12145407	Multiple actions of pituitary adenylyl cyclase activating peptide in nervous system development and regeneration.	Pubmed	4.74E-04	1.00E+00	9.99E-04	8.90E-03	1	1	ADCYAP1
Pubmed	9460531	Immunohistochemical localization of parathyroid hormone-related protein in developing mouse Meckel's cartilage and mandible.	Pubmed	4.74E-04	1.00E+00	9.99E-04	8.90E-03	1	1	PTHLH
Pubmed	25051885	Involvement of ERK1/2, p38 MAPK, and PI3K/Akt signaling pathways in the regulation of cell cycle progression by PTHrP in colon adenocarcinoma cells.	Pubmed	4.74E-04	1.00E+00	9.99E-04	8.90E-03	1	1	PTHLH
Pubmed	20376782	Dynorphin expression, processing and receptors in the alveolar macrophages, cancer cells and bronchial epithelium of lung cancer patients.	Pubmed	4.74E-04	1.00E+00	9.99E-04	8.90E-03	1	1	PDYN
Pubmed	12700714	Corticotropin-releasing factor testing reveals a dose-dependent difference in methadone maintained vs control subjects.	Pubmed	4.74E-04	1.00E+00	9.99E-04	8.90E-03	1	1	CRH
Pubmed	15664666	Expression of substance P and nitric oxide synthase in vagal sensory neurons innervating the mouse airways.	Pubmed	4.74E-04	1.00E+00	9.99E-04	8.90E-03	1	1	TAC1
Pubmed	1900134	Assignment of human preprothyrotropin-releasing hormone (TRH) gene to chromosome 3.	Pubmed	4.74E-04	1.00E+00	9.99E-04	8.90E-03	1	1	TRH
Pubmed	17559549	Prodynorphin gene promoter repeat associated with cocaine/alcohol codependence.	Pubmed	4.74E-04	1.00E+00	9.99E-04	8.90E-03	1	1	PDYN
Pubmed	23457218	Platelet neuropeptide Y is critical for ischemic revascularization in mice.	Pubmed	4.74E-04	1.00E+00	9.99E-04	8.90E-03	1	1	NPY
Pubmed	19727413	Positive correlation of PTH-related peptide with glucose in type 2 diabetes.	Pubmed	4.74E-04	1.00E+00	9.99E-04	8.90E-03	1	1	PTHLH
Pubmed	11222667	Pronociceptive actions of dynorphin maintain chronic neuropathic pain.	Pubmed	4.74E-04	1.00E+00	9.99E-04	8.90E-03	1	1	PDYN
Pubmed	21396710	A putative morphological substrate of the catecholamine-influenced neuropeptide Y (NPY) release in the human hypothalamus.	Pubmed	4.74E-04	1.00E+00	9.99E-04	8.90E-03	1	1	NPY
Pubmed	16339312	Modulation of neuropeptide Y expression in adult mice does not affect feeding.	Pubmed	4.74E-04	1.00E+00	9.99E-04	8.90E-03	1	1	NPY
Pubmed	29688601	De novo mutations in the SET nuclear proto-oncogene, encoding a component of the inhibitor of histone acetyltransferases (INHAT) complex in patients with nonsyndromic intellectual disability.	Pubmed	4.74E-04	1.00E+00	9.99E-04	8.90E-03	1	1	SET
Pubmed	12463966	Comparative study of catecholamine synthesizing enzymes in adrenal medulla of CRH knock-out mice, their CRH (+/+) mates and Sprague-Dawley rats.	Pubmed	4.74E-04	1.00E+00	9.99E-04	8.90E-03	1	1	CRH
Pubmed	21109983	The role of ADCYAP1, adenylate cyclase activating polypeptide 1, as a methylation biomarker for the early detection of cervical cancer.	Pubmed	4.74E-04	1.00E+00	9.99E-04	8.90E-03	1	1	ADCYAP1
Pubmed	12091546	Long-term deprivation of substance P in PPT-A mutant mice alters the anoxic response of the isolated respiratory network.	Pubmed	4.74E-04	1.00E+00	9.99E-04	8.90E-03	1	1	TAC1
Pubmed	9141651	Distribution of cholecystokinin immunoreactivity in the BALB/c mouse forebrain: an immunocytochemical study.	Pubmed	4.74E-04	1.00E+00	9.99E-04	8.90E-03	1	1	CCK
Pubmed	10698191	Impaired basal and restraint-induced epinephrine secretion in corticotropin-releasing hormone-deficient mice.	Pubmed	4.74E-04	1.00E+00	9.99E-04	8.90E-03	1	1	CRH
Pubmed	8557651	Overexpression of parathyroid hormone-related protein in the pancreatic islets of transgenic mice causes islet hyperplasia, hyperinsulinemia, and hypoglycemia.	Pubmed	4.74E-04	1.00E+00	9.99E-04	8.90E-03	1	1	PTHLH
Pubmed	15364032	Overexpression of the human beta-amyloid precursor protein downregulates cortistatin mRNA in PDAPP mice.	Pubmed	4.74E-04	1.00E+00	9.99E-04	8.90E-03	1	1	CORT
Pubmed	30682157	VPAC1 receptors play a dominant role in PACAP-induced vasorelaxation in female mice.	Pubmed	4.74E-04	1.00E+00	9.99E-04	8.90E-03	1	1	ADCYAP1
Pubmed	16095981	Absence of an hypoxic depression of metabolism in preproenkephalin knockout mice.	Pubmed	4.74E-04	1.00E+00	9.99E-04	8.90E-03	1	1	PENK
Pubmed	23845990	Role of PTHrP in human intestinal Caco-2 cell response to oxidative stress.	Pubmed	4.74E-04	1.00E+00	9.99E-04	8.90E-03	1	1	PTHLH
Pubmed	11855841	Regulation of cyclic AMP-dependent response element-binding protein (CREB) by the nociceptin/orphanin FQ in human dopaminergic SH-SY5Y cells.	Pubmed	4.74E-04	1.00E+00	9.99E-04	8.90E-03	1	1	PNOC
Pubmed	27725087	Sexually dimorphic neuronal responses to social isolation.	Pubmed	4.74E-04	1.00E+00	9.99E-04	8.90E-03	1	1	CRH
Pubmed	16406203	Proenkephalin peptide F immunoreactivity in different circulatory biocompartments after exercise.	Pubmed	4.74E-04	1.00E+00	9.99E-04	8.90E-03	1	1	PENK
Pubmed	8756537	Proglucagon gene expression is induced by gastrin-releasing peptide in a mouse enteroendocrine cell line.	Pubmed	4.74E-04	1.00E+00	9.99E-04	8.90E-03	1	1	GRP
Pubmed	16229904	PACAP- and PHI-mediated sustained relaxation in circular muscle of gastric fundus: findings obtained in PACAP knockout mice.	Pubmed	4.74E-04	1.00E+00	9.99E-04	8.90E-03	1	1	ADCYAP1
Pubmed	17375141	Preproenkephalin knockout mice show no depression-related phenotype.	Pubmed	4.74E-04	1.00E+00	9.99E-04	8.90E-03	1	1	PENK
Pubmed	23737731	Changes of substance P in the crevicular fluid in relation to orthodontic movement preliminary investigation.	Pubmed	4.74E-04	1.00E+00	9.99E-04	8.90E-03	1	1	TAC1
Pubmed	25035110	Acinar cell-specific knockout of the PTHrP gene decreases the proinflammatory and profibrotic responses in pancreatitis.	Pubmed	4.74E-04	1.00E+00	9.99E-04	8.90E-03	1	1	PTHLH
Pubmed	11696742	Urodynamic and clinical evidence of acute inhibitory effects of intravesical nociceptin/orphanin FQ on detrusor overactivity in humans: a pilot study.	Pubmed	4.74E-04	1.00E+00	9.99E-04	8.90E-03	1	1	PNOC
Pubmed	19805477	Pituitary adenylate cyclase-activating polypeptide and its receptors: 20 years after the discovery.	Pubmed	4.74E-04	1.00E+00	9.99E-04	8.90E-03	1	1	ADCYAP1
Pubmed	25932952	Vasoactive intestinal polypeptide promotes intestinal barrier homeostasis and protection against colitis in mice.	Pubmed	4.74E-04	1.00E+00	9.99E-04	8.90E-03	1	1	VIP
Pubmed	6267699	Characterization of a 41-residue ovine hypothalamic peptide that stimulates secretion of corticotropin and beta-endorphin.	Pubmed	4.74E-04	1.00E+00	9.99E-04	8.90E-03	1	1	CRH
Pubmed	11172058	Female preproenkephalin-knockout mice display altered emotional responses.	Pubmed	4.74E-04	1.00E+00	9.99E-04	8.90E-03	1	1	PENK
Pubmed	1617429	Learning impairment following intracerebral administration of the HIV envelope protein gp120 or a VIP antagonist.	Pubmed	4.74E-04	1.00E+00	9.99E-04	8.90E-03	1	1	VIP
Pubmed	21402056	Negative regulation of parathyroid hormone-related protein expression by steroid hormones.	Pubmed	4.74E-04	1.00E+00	9.99E-04	8.90E-03	1	1	PTHLH
Pubmed	6298628	Structure of a genomic clone encoding biologically active human relaxin.	Pubmed	4.74E-04	1.00E+00	9.99E-04	8.90E-03	1	1	RLN1
Pubmed	30618637	Contribution of Thyrotropin-Releasing Hormone to Cerebellar Long-Term Depression and Motor Learning.	Pubmed	4.74E-04	1.00E+00	9.99E-04	8.90E-03	1	1	TRH
Pubmed	23771668	Effect of baicalein on the expression of VIP in extravillous cytotrophoblasts infected with human cytomegalovirus in vitro.	Pubmed	4.74E-04	1.00E+00	9.99E-04	8.90E-03	1	1	VIP
Pubmed	25898242	Increased CRF signalling in a ventral tegmental area-interpeduncular nucleus-medial habenula circuit induces anxiety during nicotine withdrawal.	Pubmed	4.74E-04	1.00E+00	9.99E-04	8.90E-03	1	1	CRH
Pubmed	9008359	Solution structure of human neuropeptide Y.	Pubmed	4.74E-04	1.00E+00	9.99E-04	8.90E-03	1	1	NPY
Pubmed	17082354	Behavioral and neurochemical sources of variability of circadian period and phase: studies of circadian rhythms of npy-/- mice.	Pubmed	4.74E-04	1.00E+00	9.99E-04	8.90E-03	1	1	NPY
Pubmed	17430175	Therapeutical approaches of vasoactive intestinal peptide as a pleiotropic immunomodulator.	Pubmed	4.74E-04	1.00E+00	9.99E-04	8.90E-03	1	1	VIP
Pubmed	12920059	Cholecystokinin and stomach distension combine to reduce food intake in humans.	Pubmed	4.74E-04	1.00E+00	9.99E-04	8.90E-03	1	1	CCK
Pubmed	23444375	Overexpression of SET?, a protein localizing to centromeres, causes precocious separation of chromatids during the first meiosis of mouse oocytes.	Pubmed	4.74E-04	1.00E+00	9.99E-04	8.90E-03	1	1	SET
Pubmed	28919867	Sulfated Cholecystokinin-8 Promotes CD36-Mediated Fatty Acid Uptake into Primary Mouse Duodenal Enterocytes.	Pubmed	4.74E-04	1.00E+00	9.99E-04	8.90E-03	1	1	CCK
Pubmed	27527739	Association of neuropeptide Y promoter polymorphism (rs16147) with perceived stress and cardiac vagal outflow in humans.	Pubmed	4.74E-04	1.00E+00	9.99E-04	8.90E-03	1	1	NPY
Pubmed	11165373	Generation of dynorphin knockout mice.	Pubmed	4.74E-04	1.00E+00	9.99E-04	8.90E-03	1	1	PDYN
Pubmed	2995945	Vasoactive intestinal peptide: expression of the prohormone in bacterial cells.	Pubmed	4.74E-04	1.00E+00	9.99E-04	8.90E-03	1	1	VIP
Pubmed	1488105	The presence, characterisation and synthesis of neuromedin B in the human pituitary gland.	Pubmed	4.74E-04	1.00E+00	9.99E-04	8.90E-03	1	1	NMB
Pubmed	25573209	Corticotropin releasing hormone and imaging, rethinking the stress axis.	Pubmed	4.74E-04	1.00E+00	9.99E-04	8.90E-03	1	1	CRH
Pubmed	11756684	Pituitary adenylate cyclase-activating polypeptide is a sympathoadrenal neurotransmitter involved in catecholamine regulation and glucohomeostasis.	Pubmed	4.74E-04	1.00E+00	9.99E-04	8.90E-03	1	1	ADCYAP1
Pubmed	15291755	Alternative splicing of parathyroid hormone-related protein mRNA: expression and stability.	Pubmed	4.74E-04	1.00E+00	9.99E-04	8.90E-03	1	1	PTHLH
Pubmed	23744729	Vasoactive intestinal peptide attenuates liver ischemia/reperfusion injury in mice via the cyclic adenosine monophosphate-protein kinase a pathway.	Pubmed	4.74E-04	1.00E+00	9.99E-04	8.90E-03	1	1	VIP
Pubmed	16377004	Adrenergic modulation of the type 1 IP3 receptors in the rat heart.	Pubmed	4.74E-04	1.00E+00	9.99E-04	8.90E-03	1	1	CRH
Pubmed	2708388	Characterization of the human parathyroid hormone-like peptide gene. Functional and evolutionary aspects.	Pubmed	4.74E-04	1.00E+00	9.99E-04	8.90E-03	1	1	PTHLH
Pubmed	3290897	Human renal carcinoma expresses two messages encoding a parathyroid hormone-like peptide: evidence for the alternative splicing of a single-copy gene.	Pubmed	4.74E-04	1.00E+00	9.99E-04	8.90E-03	1	1	PTHLH
Pubmed	20691708	The Leu7Pro polymorphism of the signal peptide of neuropeptide Y (NPY) gene is associated with increased levels of inflammatory markers preceding vascular complications in patients with type 2 diabetes.	Pubmed	4.74E-04	1.00E+00	9.99E-04	8.90E-03	1	1	NPY
Pubmed	7782078	Assignment of the human neuropeptide Y gene to chromosome 7p15.1 by nonisotopic in situ hybridization.	Pubmed	4.74E-04	1.00E+00	9.99E-04	8.90E-03	1	1	NPY
Pubmed	19584267	Parathyroid hormone-related protein regulates cell survival pathways via integrin alpha6beta4-mediated activation of phosphatidylinositol 3-kinase/Akt signaling.	Pubmed	4.74E-04	1.00E+00	9.99E-04	8.90E-03	1	1	PTHLH
Pubmed	12605064	Neuropeptide y and alcoholism: genetic, molecular, and pharmacological evidence.	Pubmed	4.74E-04	1.00E+00	9.99E-04	8.90E-03	1	1	NPY
Pubmed	27826748	PACAP Protects the Adolescent and Adult Mice Brain from Ethanol Toxicity and Modulates Distinct Sets of Genes Regulating Similar Networks.	Pubmed	4.74E-04	1.00E+00	9.99E-04	8.90E-03	1	1	ADCYAP1
Pubmed	18555802	Direct activation of cytosolic Ca2+ signaling and enzyme secretion by cholecystokinin in human pancreatic acinar cells.	Pubmed	4.74E-04	1.00E+00	9.99E-04	8.90E-03	1	1	CCK
Pubmed	6571696	Human preprovasoactive intestinal polypeptide contains a novel PHI-27-like peptide, PHM-27.	Pubmed	4.74E-04	1.00E+00	9.99E-04	8.90E-03	1	1	VIP
Pubmed	22638857	Effects of pituitary adenylate cyclase activating polypeptide on human sperm motility.	Pubmed	4.74E-04	1.00E+00	9.99E-04	8.90E-03	1	1	ADCYAP1
Pubmed	22532103	Neuropeptide PACAP in mouse liver ischemia and reperfusion injury: immunomodulation by the cAMP-PKA pathway.	Pubmed	4.74E-04	1.00E+00	9.99E-04	8.90E-03	1	1	ADCYAP1
Pubmed	19836465	Effect of gallbladder hypomotility on cholesterol crystallization and growth in CCK-deficient mice.	Pubmed	4.74E-04	1.00E+00	9.99E-04	8.90E-03	1	1	CCK
Pubmed	22528455	PACAP is an endogenous protective factor-insights from PACAP-deficient mice.	Pubmed	4.74E-04	1.00E+00	9.99E-04	8.90E-03	1	1	ADCYAP1
Pubmed	11406119	The effect of feeding on cerebrospinal fluid corticotropin-releasing hormone levels in humans.	Pubmed	4.74E-04	1.00E+00	9.99E-04	8.90E-03	1	1	CRH
Pubmed	11165763	Orphanin FQ/nociceptin and naloxone benzoylhydrazone activate distinct receptors in BE(2)-C human neuroblastoma cells.	Pubmed	4.74E-04	1.00E+00	9.99E-04	8.90E-03	1	1	PNOC
Pubmed	17525292	Altered respiratory pattern and hypoxic response in transgenic newborn mice lacking the tachykinin-1 gene.	Pubmed	4.74E-04	1.00E+00	9.99E-04	8.90E-03	1	1	TAC1
Pubmed	16382999	Neuropeptide Y and sympathetic control of vascular tone in hypertension.	Pubmed	4.74E-04	1.00E+00	9.99E-04	8.90E-03	1	1	NPY
Pubmed	19279355	Substance P potentiates TGFbeta-1 production in lung epithelial cell lines.	Pubmed	4.74E-04	1.00E+00	9.99E-04	8.90E-03	1	1	TAC1
Pubmed	15894804	Translocation of dynorphin neuropeptides across the plasma membrane. A putative mechanism of signal transmission.	Pubmed	4.74E-04	1.00E+00	9.99E-04	8.90E-03	1	1	PDYN
Pubmed	15356166	Regulation of human polymorphonuclear leukocytes functions by the neuropeptide pituitary adenylate cyclase-activating polypeptide after activation of MAPKs.	Pubmed	4.74E-04	1.00E+00	9.99E-04	8.90E-03	1	1	ADCYAP1
Pubmed	16935438	Regulation of the prepronociceptin gene and its effect on neuronal differentiation.	Pubmed	4.74E-04	1.00E+00	9.99E-04	8.90E-03	1	1	PNOC
Pubmed	15528344	Vasoactive intestinal peptide modulates Langerhans cell immune function.	Pubmed	4.74E-04	1.00E+00	9.99E-04	8.90E-03	1	1	VIP
Pubmed	20539012	Selective nasal allergen provocation induces substance P-mediated bronchial hyperresponsiveness.	Pubmed	4.74E-04	1.00E+00	9.99E-04	8.90E-03	1	1	TAC1
Pubmed	9756788	Enhancement of antimicrobial activity of neuropeptide Y by N-terminal truncation.	Pubmed	4.74E-04	1.00E+00	9.99E-04	8.90E-03	1	1	NPY
Pubmed	17998302	Role of preprotachykinin-A gene products on multiple organ injury in LPS-induced endotoxemia.	Pubmed	4.74E-04	1.00E+00	9.99E-04	8.90E-03	1	1	TAC1
Pubmed	12225893	Nitric oxide synthase I and VIP-activated signaling are affected in salivary glands of NOD mice.	Pubmed	4.74E-04	1.00E+00	9.99E-04	8.90E-03	1	1	VIP
Pubmed	8206338	Expression of PC2 and PC1/PC3 in human pheochromocytomas.	Pubmed	4.74E-04	1.00E+00	9.99E-04	8.90E-03	1	1	PENK
Pubmed	30231016	Anthropoid primate-specific retroviral element THE1B controls expression of CRH in placenta and alters gestation length.	Pubmed	4.74E-04	1.00E+00	9.99E-04	8.90E-03	1	1	CRH
Pubmed	28460463	SET oncoprotein accumulation regulates transcription through DNA demethylation and histone hypoacetylation.	Pubmed	4.74E-04	1.00E+00	9.99E-04	8.90E-03	1	1	SET
Pubmed	23024265	Role of substance P in renal injury during DOCA-salt hypertension.	Pubmed	4.74E-04	1.00E+00	9.99E-04	8.90E-03	1	1	TAC1
Pubmed	12185361	Parathyroid hormone-related peptide is a naturally occurring, protein kinase A-dependent angiogenesis inhibitor.	Pubmed	4.74E-04	1.00E+00	9.99E-04	8.90E-03	1	1	PTHLH
Pubmed	24039782	Targeting gastrin-releasing peptide suppresses neuroblastoma progression via upregulation of PTEN signaling.	Pubmed	4.74E-04	1.00E+00	9.99E-04	8.90E-03	1	1	GRP
Pubmed	29546332	Proneurotensin Predicts Cardiovascular Disease in an Elderly Population.	Pubmed	4.74E-04	1.00E+00	9.99E-04	8.90E-03	1	1	NTS
Pubmed	1483839	Pituitary adenylate cyclase activating polypeptide (PACAP) with 27 residues. Conformation determined by 1H NMR and CD spectroscopies and distance geometry in 25% methanol solution.	Pubmed	4.74E-04	1.00E+00	9.99E-04	8.90E-03	1	1	ADCYAP1
Pubmed	29590379	Increased Plasma Proneurotensin Levels Identify NAFLD in Adults With and Without Type 2 Diabetes.	Pubmed	4.74E-04	1.00E+00	9.99E-04	8.90E-03	1	1	NTS
Pubmed	12732342	Passage of vasoactive intestinal peptide across the blood-brain barrier.	Pubmed	4.74E-04	1.00E+00	9.99E-04	8.90E-03	1	1	VIP
Pubmed	28103784	The Multi-faceted Profile of Corticotropin-releasing Factor (CRF) Family of Neuropeptides and of their Receptors on the Paracrine/Local Regulation of the Inflammatory Response.	Pubmed	4.74E-04	1.00E+00	9.99E-04	8.90E-03	1	1	CRH
Pubmed	15878959	Heat shock protein-70 expressed on the surface of cancer cells binds parathyroid hormone-related protein in vitro.	Pubmed	4.74E-04	1.00E+00	9.99E-04	8.90E-03	1	1	PTHLH
Pubmed	19179434	Minireview: Thyrotropin-releasing hormone and the thyroid hormone feedback mechanism.	Pubmed	4.74E-04	1.00E+00	9.99E-04	8.90E-03	1	1	TRH
Pubmed	17975140	Hypermethylation of tachykinin-1 is a potential biomarker in human esophageal cancer.	Pubmed	4.74E-04	1.00E+00	9.99E-04	8.90E-03	1	1	TAC1
Pubmed	15834139	Accelerated evolution of the pituitary adenylate cyclase-activating polypeptide precursor gene during human origin.	Pubmed	4.74E-04	1.00E+00	9.99E-04	8.90E-03	1	1	ADCYAP1
Pubmed	12810618	10 years of mouse cancer modifier loci: human relevance.	Pubmed	4.74E-04	1.00E+00	9.99E-04	8.90E-03	1	1	PTHLH
Pubmed	6605851	Isolation and sequence analysis of the human corticotropin-releasing factor precursor gene.	Pubmed	4.74E-04	1.00E+00	9.99E-04	8.90E-03	1	1	CRH
Pubmed	12220738	Vasoactive intestinal peptide mRNA and immunoreactivity are decreased in fetal alcohol syndrome model.	Pubmed	4.74E-04	1.00E+00	9.99E-04	8.90E-03	1	1	VIP
Pubmed	25252304	[Role of parathyroid hormone-like hormone during embryonic development].	Pubmed	4.74E-04	1.00E+00	9.99E-04	8.90E-03	1	1	PTHLH
Pubmed	8645247	Structure and regional distribution of nociceptin/orphanin FQ precursor.	Pubmed	4.74E-04	1.00E+00	9.99E-04	8.90E-03	1	1	PNOC
Pubmed	15064281	Neuropeptide Y is required for hyperphagic feeding in response to neuroglucopenia.	Pubmed	4.74E-04	1.00E+00	9.99E-04	8.90E-03	1	1	NPY
Pubmed	15832292	Substance P regulates natural killer cell interferon-gamma production and resistance to Pseudomonas aeruginosa infection.	Pubmed	4.74E-04	1.00E+00	9.99E-04	8.90E-03	1	1	TAC1
Pubmed	23172177	Efferent projections of neuropeptide Y-expressing neurons of the dorsomedial hypothalamus in chronic hyperphagic models.	Pubmed	4.74E-04	1.00E+00	9.99E-04	8.90E-03	1	1	NPY
Pubmed	27385383	Parvalbumin Interneurons of Central Amygdala Regulate the Negative Affective States and the Expression of Corticotrophin-Releasing Hormone During Morphine Withdrawal.	Pubmed	4.74E-04	1.00E+00	9.99E-04	8.90E-03	1	1	CRH
Pubmed	17509748	Relaxin signalling in THP-1 cells uses a novel phosphotyrosine-dependent pathway.	Pubmed	4.74E-04	1.00E+00	9.99E-04	8.90E-03	1	1	RLN1
Pubmed	21261589	The role of corticotropin-releasing hormone in the pathophysiology of depression: therapeutic implications.	Pubmed	4.74E-04	1.00E+00	9.99E-04	8.90E-03	1	1	CRH
Pubmed	11194934	Significant association between a silent polymorphism in the neuromedin B gene and body weight in German children and adolescents.	Pubmed	4.74E-04	1.00E+00	9.99E-04	8.90E-03	1	1	NMB
Pubmed	21211837	Mice deficient in pituitary adenylate cyclase activating polypeptide (PACAP) show increased susceptibility to in vivo renal ischemia/reperfusion injury.	Pubmed	4.74E-04	1.00E+00	9.99E-04	8.90E-03	1	1	ADCYAP1
Pubmed	18161477	The evolution of the relaxin peptide family and their receptors.	Pubmed	4.74E-04	1.00E+00	9.99E-04	8.90E-03	1	1	RLN1
Pubmed	18212352	Phorbol ester stimulates corticotropin-releasing hormone gene promoter activity through a cAMP regulatory element in primary placental cells.	Pubmed	4.74E-04	1.00E+00	9.99E-04	8.90E-03	1	1	CRH
Pubmed	10409817	Differential responses to parathyroid hormone-related protein (PTHrP) deficiency in the various craniofacial cartilages.	Pubmed	4.74E-04	1.00E+00	9.99E-04	8.90E-03	1	1	PTHLH
Pubmed	8735615	The effect of nociceptin on Ca2+ channel current and intracellular Ca2+ in the SH-SY5Y human neuroblastoma cell line.	Pubmed	4.74E-04	1.00E+00	9.99E-04	8.90E-03	1	1	PNOC
Pubmed	12826326	Relaxin: new peptides, receptors and novel actions.	Pubmed	4.74E-04	1.00E+00	9.99E-04	8.90E-03	1	1	RLN1
Pubmed	19115410	Purinergic receptor activation evokes neurotrophic factor neuropeptide Y release from neonatal mouse olfactory epithelial slices.	Pubmed	4.74E-04	1.00E+00	9.99E-04	8.90E-03	1	1	NPY
Pubmed	10828849	Parathyroid hormone-related protein(1-34) in gestational fluids and release from human gestational tissues.	Pubmed	4.74E-04	1.00E+00	9.99E-04	8.90E-03	1	1	PTHLH
Pubmed	12582011	NPY ablation in C57BL/6 mice leads to mild obesity and to an impaired refeeding response to fasting.	Pubmed	4.74E-04	1.00E+00	9.99E-04	8.90E-03	1	1	NPY
Pubmed	24326400	Forebrain-specific CRF overproduction during development is sufficient to induce enduring anxiety and startle abnormalities in adult mice.	Pubmed	4.74E-04	1.00E+00	9.99E-04	8.90E-03	1	1	CRH
Pubmed	30082421	SCN VIP Neurons Are Essential for Normal Light-Mediated Resetting of the Circadian System.	Pubmed	4.74E-04	1.00E+00	9.99E-04	8.90E-03	1	1	VIP
Pubmed	12215082	A functional neuropeptide Y Leu7Pro polymorphism associated with alcohol dependence in a large population sample from the United States.	Pubmed	4.74E-04	1.00E+00	9.99E-04	8.90E-03	1	1	NPY
Pubmed	9802405	Effect of peripheral axotomy on dorsal root ganglion neuron phenotype and autonomy behaviour in neuropeptide Y-deficient mice.	Pubmed	4.74E-04	1.00E+00	9.99E-04	8.90E-03	1	1	NPY
Pubmed	10540203	Preproenkephalin is a Th2 cytokine but is not required for Th2 differentiation in vitro.	Pubmed	4.74E-04	1.00E+00	9.99E-04	8.90E-03	1	1	PENK
Pubmed	19695764	Serum relaxin levels are reduced in pregnant women with a history of recurrent miscarriage, and correlate with maternal uterine artery Doppler indices in first trimester.	Pubmed	4.74E-04	1.00E+00	9.99E-04	8.90E-03	1	1	RLN1
Pubmed	28370412	PTHrP(12-48) Modulates the Bone Marrow Microenvironment and Suppresses Human Osteoclast Differentiation and Lifespan.	Pubmed	4.74E-04	1.00E+00	9.99E-04	8.90E-03	1	1	PTHLH
Pubmed	16125539	Combined corticotropin-releasing hormone and glucocorticoid deficiency does not enhance counterregulatory responses after recurrent hypoglycemia in mice.	Pubmed	4.74E-04	1.00E+00	9.99E-04	8.90E-03	1	1	CRH
Pubmed	21844565	SET oncoprotein overexpression in B-cell chronic lymphocytic leukemia and non-Hodgkin lymphoma: a predictor of aggressive disease and a new treatment target.	Pubmed	4.74E-04	1.00E+00	9.99E-04	8.90E-03	1	1	SET
Pubmed	9346858	Synthesis, solution structure and biological action of PACAP-related peptide.	Pubmed	4.74E-04	1.00E+00	9.99E-04	8.90E-03	1	1	ADCYAP1
Pubmed	22695044	Endogenous dynorphin protects against neurotoxin-elicited nigrostriatal dopaminergic neuron damage and motor deficits in mice.	Pubmed	4.74E-04	1.00E+00	9.99E-04	8.90E-03	1	1	PDYN
Pubmed	18423848	Cholecystokinin (CCK) and CCK receptor expression by human gliomas: Evidence for an autocrine/paracrine stimulatory loop.	Pubmed	4.74E-04	1.00E+00	9.99E-04	8.90E-03	1	1	CCK
Pubmed	15629138	Direct evidence that PTHrP expression promotes prostate cancer progression in bone.	Pubmed	4.74E-04	1.00E+00	9.99E-04	8.90E-03	1	1	PTHLH
Pubmed	11684339	Impaired response to chemical irritation of the urinary tract in mice with disruption of the preprotachykinin gene.	Pubmed	4.74E-04	1.00E+00	9.99E-04	8.90E-03	1	1	TAC1
Pubmed	23065762	Hypoxic ventilatory response in Tac1-/- neonatal mice following exposure to opioids.	Pubmed	4.74E-04	1.00E+00	9.99E-04	8.90E-03	1	1	TAC1
Pubmed	9257731	Nociceptin/orphanin FQ stimulates extracellular acidification and desensitization of the response involves protein kinase C.	Pubmed	4.74E-04	1.00E+00	9.99E-04	8.90E-03	1	1	PNOC
Pubmed	1588046	Vasoactive intestinal peptide stimulates T lymphocytes to release IL-5 in murine schistosomiasis mansoni infection.	Pubmed	4.74E-04	1.00E+00	9.99E-04	8.90E-03	1	1	VIP
Pubmed	29544087	Vasoactive intestinal peptide overexpression mediated by lentivirus attenuates lipopolysaccharide-induced acute lung injury in mice by inhibiting inflammation.	Pubmed	4.74E-04	1.00E+00	9.99E-04	8.90E-03	1	1	VIP
Pubmed	1686839	DNA variants with telomere probe enable genetic mapping of ends of mouse chromosomes.	Pubmed	4.74E-04	1.00E+00	9.99E-04	8.90E-03	1	1	CCK
Pubmed	14586397	Allele-specific patterns of the mouse parathyroid hormone-related protein: influences on cell adhesion and migration.	Pubmed	4.74E-04	1.00E+00	9.99E-04	8.90E-03	1	1	PTHLH
Pubmed	21983071	Relaxin regulates myofibroblast contractility and protects against lung fibrosis.	Pubmed	4.74E-04	1.00E+00	9.99E-04	8.90E-03	1	1	RLN1
Pubmed	21192987	Influence of transgenic corticotropin-releasing factor (CRF) over-expression on social recognition memory in mice.	Pubmed	4.74E-04	1.00E+00	9.99E-04	8.90E-03	1	1	CRH
Pubmed	26402844	Diversity of Reporter Expression Patterns in Transgenic Mouse Lines Targeting Corticotropin-Releasing Hormone-Expressing Neurons.	Pubmed	4.74E-04	1.00E+00	9.99E-04	8.90E-03	1	1	CRH
Pubmed	24725082	Functional roles of the nuclear localization signal of parathyroid hormone-related protein (PTHrP) in osteoblastic cells.	Pubmed	4.74E-04	1.00E+00	9.99E-04	8.90E-03	1	1	PTHLH
Pubmed	24640561	Relaxin and the control of primate parturition.	Pubmed	4.74E-04	1.00E+00	9.99E-04	8.90E-03	1	1	RLN1
Pubmed	17065821	Novel late response genes of PTHrP in chondrocytes.	Pubmed	4.74E-04	1.00E+00	9.99E-04	8.90E-03	1	1	PTHLH
Pubmed	17606312	Gastrointestinal dysfunction in mice with a targeted mutation in the gene encoding vasoactive intestinal polypeptide: a model for the study of intestinal ileus and Hirschsprung's disease.	Pubmed	4.74E-04	1.00E+00	9.99E-04	8.90E-03	1	1	VIP
Pubmed	25847417	High plasma neurotensin levels in children with Prader-Willi syndrome.	Pubmed	4.74E-04	1.00E+00	9.99E-04	8.90E-03	1	1	NTS
Pubmed	27902570	Preprotachykinin A is expressed by a distinct population of excitatory neurons in the mouse superficial spinal dorsal horn including cells that respond to noxious and pruritic stimuli.	Pubmed	4.74E-04	1.00E+00	9.99E-04	8.90E-03	1	1	TAC1
Pubmed	27345595	PACAP suppresses dry eye signs by stimulating tear secretion.	Pubmed	4.74E-04	1.00E+00	9.99E-04	8.90E-03	1	1	ADCYAP1
Pubmed	25677772	Nociceptin and meiosis during spermatogenesis in postnatal testes.	Pubmed	4.74E-04	1.00E+00	9.99E-04	8.90E-03	1	1	PNOC
Pubmed	27306314	Hypothalamic CRH neurons orchestrate complex behaviours after stress.	Pubmed	4.74E-04	1.00E+00	9.99E-04	8.90E-03	1	1	CRH
Pubmed	15128746	Impact of the mitogen-activated protein kinase pathway on parathyroid hormone-related protein actions in osteoblasts.	Pubmed	4.74E-04	1.00E+00	9.99E-04	8.90E-03	1	1	PTHLH
Pubmed	17568667	Corticotropin releasing hormone modulates endotoxin-induced inflammatory cytokine expression in human trophoblast cells.	Pubmed	4.74E-04	1.00E+00	9.99E-04	8.90E-03	1	1	CRH
Pubmed	23742173	Relaxin improves multiple markers of wound healing and ameliorates the disturbed healing pattern of genetically diabetic mice.	Pubmed	4.74E-04	1.00E+00	9.99E-04	8.90E-03	1	1	RLN1
Pubmed	12504599	Pituitary adenylate cyclase-activating polypeptide induces astrocyte differentiation of precursor cells from developing cerebral cortex.	Pubmed	4.74E-04	1.00E+00	9.99E-04	8.90E-03	1	1	ADCYAP1
Pubmed	28053027	Endogenously Released Neuropeptide Y Suppresses Hippocampal Short-Term Facilitation and Is Impaired by Stress-Induced Anxiety.	Pubmed	4.74E-04	1.00E+00	9.99E-04	8.90E-03	1	1	NPY
Pubmed	12549623	Constitutive production of parathyroid hormone-related protein (PTHrP) by fibroblasts derived from normal and pathological human breast tissue.	Pubmed	4.74E-04	1.00E+00	9.99E-04	8.90E-03	1	1	PTHLH
Pubmed	1954916	A potent inhibitor of osteoclastic bone resorption within a highly conserved pentapeptide region of parathyroid hormone-related protein; PTHrP[107-111].	Pubmed	4.74E-04	1.00E+00	9.99E-04	8.90E-03	1	1	PTHLH
Pubmed	7804850	Concentrations and distribution of vasoactive intestinal peptide (VIP), peptide histidine isoleucine (PHI) and peptide histidine valine (PHV) in the cerebral cortex and the suprachiasmatic nucleus of the mouse.	Pubmed	4.74E-04	1.00E+00	9.99E-04	8.90E-03	1	1	VIP
Pubmed	11011067	Cortistatin: a member of the somatostatin neuropeptide family with distinct physiological functions.	Pubmed	4.74E-04	1.00E+00	9.99E-04	8.90E-03	1	1	CORT
Pubmed	6529856	Measurement and characterisation of human cholecystokinin-like immunoreactivity (CCK-LI) in tissues by radioimmunoassay.	Pubmed	4.74E-04	1.00E+00	9.99E-04	8.90E-03	1	1	CCK
Pubmed	22825476	Investigation of proNT/NMN secretion from small cell lung carcinoma cells using a mouse xenograft model.	Pubmed	4.74E-04	1.00E+00	9.99E-04	8.90E-03	1	1	NTS
Pubmed	1630450	Can, a putative oncogene associated with myeloid leukemogenesis, may be activated by fusion of its 3' half to different genes: characterization of the set gene.	Pubmed	4.74E-04	1.00E+00	9.99E-04	8.90E-03	1	1	SET
Pubmed	20340024	The vasoactive intestinal polypeptide (VIP) levels at the patients with ankylosing spondylitis and its association with inflammation markers.	Pubmed	4.74E-04	1.00E+00	9.99E-04	8.90E-03	1	1	VIP
Pubmed	2055117	Assignment of the rat parathyroid hormone-like peptide gene (PTHLH) to chromosome 4: evidence for conserved synteny between human chromosome 12, mouse chromosome 6, and rat chromosome 4.	Pubmed	4.74E-04	1.00E+00	9.99E-04	8.90E-03	1	1	PTHLH
Pubmed	22705097	NPY and NPY receptors in airway structural and inflammatory cells in allergic asthma.	Pubmed	4.74E-04	1.00E+00	9.99E-04	8.90E-03	1	1	NPY
Pubmed	3871412	Corticotropin-releasing factor and behavior.	Pubmed	4.74E-04	1.00E+00	9.99E-04	8.90E-03	1	1	CRH
Pubmed	25205743	NPY antagonism reduces adiposity and attenuates age-related imbalance of adipose tissue metabolism.	Pubmed	4.74E-04	1.00E+00	9.99E-04	8.90E-03	1	1	NPY
Pubmed	22133779	Overexpression of SET is a recurrent event associated with poor outcome and contributes to protein phosphatase 2A inhibition in acute myeloid leukemia.	Pubmed	4.74E-04	1.00E+00	9.99E-04	8.90E-03	1	1	SET
Pubmed	27788523	Association of Neuropeptide Y Gene rs16147 Polymorphism with Cardiovascular Risk Factors, Adipokines, and Metabolic Syndrome in Patients with Obesity.	Pubmed	4.74E-04	1.00E+00	9.99E-04	8.90E-03	1	1	NPY
Pubmed	15306549	Mapping of the SCA23 locus involved in autosomal dominant cerebellar ataxia to chromosome region 20p13-12.3.	Pubmed	4.74E-04	1.00E+00	9.99E-04	8.90E-03	1	1	PDYN
Pubmed	2444979	Localization of neuropeptide Y mRNA in neurons of human cerebral cortex by means of in situ hybridization with a complementary RNA probe.	Pubmed	4.74E-04	1.00E+00	9.99E-04	8.90E-03	1	1	NPY
Pubmed	9482938	Hypoalgesia in mice with a targeted deletion of the tachykinin 1 gene.	Pubmed	4.74E-04	1.00E+00	9.99E-04	8.90E-03	1	1	TAC1
Pubmed	16309788	Elevated maternal cortisol early in pregnancy predicts third trimester levels of placental corticotropin releasing hormone (CRH): priming the placental clock.	Pubmed	4.74E-04	1.00E+00	9.99E-04	8.90E-03	1	1	CRH
Pubmed	16551631	Parathyroid hormone-related protein regulates tumor-relevant genes in breast cancer cells.	Pubmed	4.74E-04	1.00E+00	9.99E-04	8.90E-03	1	1	PTHLH
Pubmed	14711972	Characterization of wide dynamic range neurons in the deep dorsal horn of the spinal cord in preprotachykinin-a null mice in vivo.	Pubmed	4.74E-04	1.00E+00	9.99E-04	8.90E-03	1	1	TAC1
Pubmed	21746772	Inflammatory effects of blood leukocytes: association with vascular function in neuropeptide Y proline 7-genotyped type 2 diabetes patients.	Pubmed	4.74E-04	1.00E+00	9.99E-04	8.90E-03	1	1	NPY
Pubmed	12099906	Effects of transgenic overproduction of CRH on anxiety-like behaviour.	Pubmed	4.74E-04	1.00E+00	9.99E-04	8.90E-03	1	1	CRH
Pubmed	15328192	Procholecystokinin as marker of human Ewing sarcomas.	Pubmed	4.74E-04	1.00E+00	9.99E-04	8.90E-03	1	1	CCK
Pubmed	27460148	Increases of SET level and translocation are correlated with tau hyperphosphorylation at ser202/thr205 in CA1 of Ts65Dn mice.	Pubmed	4.74E-04	1.00E+00	9.99E-04	8.90E-03	1	1	SET
Pubmed	15956731	Human decidual relaxin and preterm birth.	Pubmed	4.74E-04	1.00E+00	9.99E-04	8.90E-03	1	1	RLN1
Pubmed	22830401	The multifaceted actions of PTHrP in skeletal metastasis.	Pubmed	4.74E-04	1.00E+00	9.99E-04	8.90E-03	1	1	PTHLH
Pubmed	20808262	Tissue-specific DNA methylation of the human prodynorphin gene in post-mortem brain tissues and PBMCs.	Pubmed	4.74E-04	1.00E+00	9.99E-04	8.90E-03	1	1	PDYN
Pubmed	7503733	N23K, a gene transiently up-regulated during neural differentiation, encodes a precursor protein for a newly identified neuropeptide nociceptin.	Pubmed	4.74E-04	1.00E+00	9.99E-04	8.90E-03	1	1	PNOC
Pubmed	23466699	PACAP signaling exerts opposing effects on neuroprotection and neuroinflammation during disease progression in the SOD1(G93A) mouse model of amyotrophic lateral sclerosis.	Pubmed	4.74E-04	1.00E+00	9.99E-04	8.90E-03	1	1	ADCYAP1
Pubmed	21068146	Parathyroid hormone-like hormone (PTHLH) represses decidualization of human uterine fibroblast cells by an autocrine/paracrine mechanism.	Pubmed	4.74E-04	1.00E+00	9.99E-04	8.90E-03	1	1	PTHLH
Pubmed	19289742	Neuropeptide Y: its multiple effects in the CNS and potential clinical significance.	Pubmed	4.74E-04	1.00E+00	9.99E-04	8.90E-03	1	1	NPY
Pubmed	27324639	Pleiotropic and retinoprotective functions of PACAP.	Pubmed	4.74E-04	1.00E+00	9.99E-04	8.90E-03	1	1	ADCYAP1
Pubmed	17305733	Leucine 7-proline 7 polymorphism in the signal peptide of neuropeptide Y is not a risk factor for exudative age-related macular degeneration.	Pubmed	4.74E-04	1.00E+00	9.99E-04	8.90E-03	1	1	NPY
Pubmed	19199096	The role of endogenous PACAP in motor stimulation and conditioned place preference induced by morphine in mice.	Pubmed	4.74E-04	1.00E+00	9.99E-04	8.90E-03	1	1	ADCYAP1
Pubmed	15351928	Nociceptin inhibits vanilloid TRPV-1-mediated neurosensitization induced by fenoterol in human isolated bronchi.	Pubmed	4.74E-04	1.00E+00	9.99E-04	8.90E-03	1	1	PNOC
Pubmed	12843176	Changes in diurnal sympathoadrenal balance and pituitary hormone secretion in subjects with Leu7Pro polymorphism in the prepro-neuropeptide Y.	Pubmed	4.74E-04	1.00E+00	9.99E-04	8.90E-03	1	1	NPY
Pubmed	16823850	SET complex in serous epithelial ovarian cancer.	Pubmed	4.74E-04	1.00E+00	9.99E-04	8.90E-03	1	1	SET
Pubmed	24231353	Impaired periamygdaloid-cortex prodynorphin is characteristic of opiate addiction and depression.	Pubmed	4.74E-04	1.00E+00	9.99E-04	8.90E-03	1	1	PDYN
Pubmed	15468147	Corticotropin-releasing hormone induces keratinocyte differentiation in the adult human epidermis.	Pubmed	4.74E-04	1.00E+00	9.99E-04	8.90E-03	1	1	CRH
Pubmed	3031687	Molecular structure of mammalian neuropeptide Y: analysis by molecular cloning and computer-aided comparison with crystal structure of avian homologue.	Pubmed	4.74E-04	1.00E+00	9.99E-04	8.90E-03	1	1	NPY
Pubmed	21783178	Site-specific genetic manipulation of amygdala corticotropin-releasing factor reveals its imperative role in mediating behavioral response to challenge.	Pubmed	4.74E-04	1.00E+00	9.99E-04	8.90E-03	1	1	CRH
Pubmed	17855557	MicroRNAs regulate synthesis of the neurotransmitter substance P in human mesenchymal stem cell-derived neuronal cells.	Pubmed	4.74E-04	1.00E+00	9.99E-04	8.90E-03	1	1	TAC1
Pubmed	8056147	The parathyroid hormone-related protein gene and its expression.	Pubmed	4.74E-04	1.00E+00	9.99E-04	8.90E-03	1	1	PTHLH
Pubmed	10330406	Parathyroid hormone-related peptide (PTHrP)-dependent and -independent effects of transforming growth factor beta (TGF-beta) on endochondral bone formation.	Pubmed	4.74E-04	1.00E+00	9.99E-04	8.90E-03	1	1	PTHLH
Pubmed	15956703	The relaxin gene-knockout mouse: a model of progressive fibrosis.	Pubmed	4.74E-04	1.00E+00	9.99E-04	8.90E-03	1	1	RLN1
Pubmed	20832114	Plasma neuropeptide Y levels differ in distinct diabetic conditions.	Pubmed	4.74E-04	1.00E+00	9.99E-04	8.90E-03	1	1	NPY
Pubmed	25627687	Cardiomyocyte expression and cell-specific processing of procholecystokinin.	Pubmed	4.74E-04	1.00E+00	9.99E-04	8.90E-03	1	1	CCK
Pubmed	10947864	Nuclear and nucleolar localization of parathyroid hormone-related protein.	Pubmed	4.74E-04	1.00E+00	9.99E-04	8.90E-03	1	1	PTHLH
Pubmed	1730060	Structure of the human pituitary adenylate cyclase activating polypeptide (PACAP) gene.	Pubmed	4.74E-04	1.00E+00	9.99E-04	8.90E-03	1	1	ADCYAP1
Pubmed	21190576	Plasma neuropeptide Y: a biomarker for symptom severity in chronic fatigue syndrome.	Pubmed	4.74E-04	1.00E+00	9.99E-04	8.90E-03	1	1	NPY
Pubmed	18160529	Characterization of mice lacking the gene for cholecystokinin.	Pubmed	4.74E-04	1.00E+00	9.99E-04	8.90E-03	1	1	CCK
Pubmed	18931446	Effect of leucine-to-methionine substitutions on the diffraction quality of histone chaperone SET/TAF-Ibeta/INHAT crystals.	Pubmed	4.74E-04	1.00E+00	9.99E-04	8.90E-03	1	1	SET
Pubmed	28460009	The Endogenous Stress Hormone CRH Modulates Excitatory Transmission and Network Physiology in Hippocampus.	Pubmed	4.74E-04	1.00E+00	9.99E-04	8.90E-03	1	1	CRH
Pubmed	14622435	Enhanced up-regulation of corticotropin-releasing hormone gene expression in response to restraint stress in the hypothalamic paraventricular nucleus of oxytocin gene-deficient male mice.	Pubmed	4.74E-04	1.00E+00	9.99E-04	8.90E-03	1	1	CRH
Pubmed	17383102	Cerebellar cortical-layer-specific control of neuronal migration by pituitary adenylate cyclase-activating polypeptide.	Pubmed	4.74E-04	1.00E+00	9.99E-04	8.90E-03	1	1	ADCYAP1
Pubmed	22759379	Minireview: The neural regulation of the hypothalamic-pituitary-thyroid axis.	Pubmed	4.74E-04	1.00E+00	9.99E-04	8.90E-03	1	1	TRH
Pubmed	20950413	Further evidence for an involvement of nociceptin/orphanin FQ in the pathophysiology of Parkinson's disease: a behavioral and neurochemical study in reserpinized mice.	Pubmed	4.74E-04	1.00E+00	9.99E-04	8.90E-03	1	1	PNOC
Pubmed	24252886	Functional dyspepsia patients have lower mucosal cholecystokinin concentrations in response to duodenal lipid.	Pubmed	4.74E-04	1.00E+00	9.99E-04	8.90E-03	1	1	CCK
Pubmed	14634580	Neurokinin B peptide serum levels are higher in normotensive pregnant women than in preeclamptic pregnant women.	Pubmed	4.74E-04	1.00E+00	9.99E-04	8.90E-03	1	1	TAC3
Pubmed	22677993	SET oncogene is upregulated in pediatric acute lymphoblastic leukemia.	Pubmed	4.74E-04	1.00E+00	9.99E-04	8.90E-03	1	1	SET
Pubmed	25388166	Deregulation of the PP2A inhibitor SET shows promising therapeutic implications and determines poor clinical outcome in patients with metastatic colorectal cancer.	Pubmed	4.74E-04	1.00E+00	9.99E-04	8.90E-03	1	1	SET
Pubmed	23062312	The endogenous opioid dynorphin is required for normal bone homeostasis in mice.	Pubmed	4.74E-04	1.00E+00	9.99E-04	8.90E-03	1	1	PDYN
Pubmed	9573339	Cloning and characterization of the mouse pituitary adenylate cyclase-activating polypeptide (PACAP) gene.	Pubmed	4.74E-04	1.00E+00	9.99E-04	8.90E-03	1	1	ADCYAP1
Pubmed	11713985	Post-translational modifications of heterologously expressed cholecystokinin in Saccharomyces cerevisiae.	Pubmed	4.74E-04	1.00E+00	9.99E-04	8.90E-03	1	1	CCK
Pubmed	23970097	Possible role of dynorphins in Alzheimer's disease and age-related cognitive deficits.	Pubmed	4.74E-04	1.00E+00	9.99E-04	8.90E-03	1	1	PDYN
Pubmed	22648511	PACAP immunoreactivity in human malignant tumor samples and cardiac diseases.	Pubmed	4.74E-04	1.00E+00	9.99E-04	8.90E-03	1	1	ADCYAP1
Pubmed	28964791	Gut satiety hormones cholecystokinin and glucagon-like Peptide-17-36 amide mediate anorexia induction by trichothecenes T-2 toxin, HT-2 toxin, diacetoxyscirpenol and neosolaniol.	Pubmed	4.74E-04	1.00E+00	9.99E-04	8.90E-03	1	1	CCK
Pubmed	10873655	Inefficient function of the signal sequence of PTHrP for targeting into the secretory pathway.	Pubmed	4.74E-04	1.00E+00	9.99E-04	8.90E-03	1	1	PTHLH
Pubmed	23662774	Parathyroid hormone-related protein is induced by hypoxia and promotes expression of the differentiated phenotype of human articular chondrocytes.	Pubmed	4.74E-04	1.00E+00	9.99E-04	8.90E-03	1	1	PTHLH
Pubmed	23471613	Identification and characterization of novel PDYN mutations in dominant cerebellar ataxia cases.	Pubmed	4.74E-04	1.00E+00	9.99E-04	8.90E-03	1	1	PDYN
Pubmed	14715146	Distribution of nociceptin/orphanin FQ in adult human brain.	Pubmed	4.74E-04	1.00E+00	9.99E-04	8.90E-03	1	1	PNOC
Pubmed	12576923	Parathyroid hormone-related protein and hypercalcemia in patients with metastatic melanoma: case report and review.	Pubmed	4.74E-04	1.00E+00	9.99E-04	8.90E-03	1	1	PTHLH
Pubmed	12855416	Disrupted circadian rhythms in VIP- and PHI-deficient mice.	Pubmed	4.74E-04	1.00E+00	9.99E-04	8.90E-03	1	1	VIP
Pubmed	28240194	Brain and Gut CRF Signaling: Biological Actions and Role in the Gastrointestinal Tract.	Pubmed	4.74E-04	1.00E+00	9.99E-04	8.90E-03	1	1	CRH
Pubmed	28457596	Homeostatic Plasticity Shapes Cell-Type-Specific Wiring in the Retina.	Pubmed	4.74E-04	1.00E+00	9.99E-04	8.90E-03	1	1	CCK
Pubmed	27035430	Construction of SET overexpression vector and its effects on the proliferation and apoptosis of 293T cells.	Pubmed	4.74E-04	1.00E+00	9.99E-04	8.90E-03	1	1	SET
Pubmed	25058882	Cholecystokinin receptor antagonist halts progression of pancreatic cancer precursor lesions and fibrosis in mice.	Pubmed	4.74E-04	1.00E+00	9.99E-04	8.90E-03	1	1	CCK
Pubmed	12820319	Pro-gastrin-releasing peptide (Pro-GRP), a tumor marker for small cell lung cancer.	Pubmed	4.74E-04	1.00E+00	9.99E-04	8.90E-03	1	1	GRP
Pubmed	27837667	Association study of arcuate nucleus neuropeptide Y neuron receptor gene variation and serum NPY levels in clozapine treated patients with schizophrenia.	Pubmed	4.74E-04	1.00E+00	9.99E-04	8.90E-03	1	1	NPY
Pubmed	17964713	PTHrP increases xenograft growth and promotes integrin alpha6beta4 expression and Akt activation in colon cancer.	Pubmed	4.74E-04	1.00E+00	9.99E-04	8.90E-03	1	1	PTHLH
Pubmed	28380486	Neurokinin 3 Receptor Antagonism Reveals Roles for Neurokinin B in the Regulation of Gonadotropin Secretion and Hot Flashes in Postmenopausal Women.	Pubmed	4.74E-04	1.00E+00	9.99E-04	8.90E-03	1	1	TAC3
Pubmed	27077948	Neural clocks and Neuropeptide F/Y regulate circadian gene expression in a peripheral metabolic tissue.	Pubmed	4.74E-04	1.00E+00	9.99E-04	8.90E-03	1	1	NPY
Pubmed	9822213	Identification of nociceptin in human cerebrospinal fluid: comparison of levels in pain and non-pain states.	Pubmed	4.74E-04	1.00E+00	9.99E-04	8.90E-03	1	1	PNOC
Pubmed	24077326	The relationship of plasma neuropeptide Y levels with coronary collateral development.	Pubmed	4.74E-04	1.00E+00	9.99E-04	8.90E-03	1	1	NPY
Pubmed	24735328	Electrophysiology of arcuate neurokinin B neurons in female Tac2-EGFP transgenic mice.	Pubmed	4.74E-04	1.00E+00	9.99E-04	8.90E-03	1	1	TAC3
Pubmed	18926801	Neuropeptide Y-deficient mice show altered circadian response to simulated natural photoperiod.	Pubmed	4.74E-04	1.00E+00	9.99E-04	8.90E-03	1	1	NPY
Pubmed	25256105	Genome-wide exploration identifies sex-specific genetic effects of alleles upstream NPY to increase the risk of severe periodontitis in men.	Pubmed	4.74E-04	1.00E+00	9.99E-04	8.90E-03	1	1	NPY
Pubmed	12062800	Regulation of transcription of the human prepronociceptin gene by Sp1.	Pubmed	4.74E-04	1.00E+00	9.99E-04	8.90E-03	1	1	PNOC
Pubmed	10491292	Autocrine induction of substance P mRNA and peptide in cultured normal human keratinocytes.	Pubmed	4.74E-04	1.00E+00	9.99E-04	8.90E-03	1	1	TAC1
Pubmed	7894056	High conservation of upstream regulatory sequences on the human and mouse vasoactive intestinal peptide (VIP) genes.	Pubmed	4.74E-04	1.00E+00	9.99E-04	8.90E-03	1	1	VIP
Pubmed	20526012	Serum concentrations of substance P in cholestasis.	Pubmed	4.74E-04	1.00E+00	9.99E-04	8.90E-03	1	1	TAC1
Pubmed	19190179	Pituitary adenylyl cyclase-activating polypeptide is an intrinsic regulator of Treg abundance and protects against experimental autoimmune encephalomyelitis.	Pubmed	4.74E-04	1.00E+00	9.99E-04	8.90E-03	1	1	ADCYAP1
Pubmed	9380725	Tertiary hypothyroidism and hyperglycemia in mice with targeted disruption of the thyrotropin-releasing hormone gene.	Pubmed	4.74E-04	1.00E+00	9.99E-04	8.90E-03	1	1	TRH
Pubmed	18055304	Neuropeptide Y gene polymorphism and plasma neuropeptide Y level in febrile seizure patients in Taiwan.	Pubmed	4.74E-04	1.00E+00	9.99E-04	8.90E-03	1	1	NPY
Pubmed	15833812	Corticotropin-releasing hormone activates ERK1/2 MAPK in specific brain areas.	Pubmed	4.74E-04	1.00E+00	9.99E-04	8.90E-03	1	1	CRH
Pubmed	19246974	Involvement of regulatory elements on corticotropin-releasing factor gene promoter in hypothalamic 4B cells.	Pubmed	4.74E-04	1.00E+00	9.99E-04	8.90E-03	1	1	CRH
Pubmed	15680469	Human neuropeptide Y signal peptide gain-of-function polymorphism is associated with increased body mass index: possible mode of function.	Pubmed	4.74E-04	1.00E+00	9.99E-04	8.90E-03	1	1	NPY
Pubmed	10773581	Endogenous parathyroid hormone-related peptide enhances proliferation and inhibits differentiation in the osteoblast-like cell line ROS 17/2.8.	Pubmed	4.74E-04	1.00E+00	9.99E-04	8.90E-03	1	1	PTHLH
Pubmed	6754769	Neurotensin: topographical distribution in rat brain by immunohistochemistry.	Pubmed	4.74E-04	1.00E+00	9.99E-04	8.90E-03	1	1	NTS
Pubmed	22201770	Tissue specific epigenetic differences in CRH gene expression.	Pubmed	4.74E-04	1.00E+00	9.99E-04	8.90E-03	1	1	CRH
Pubmed	26673939	An association between neuropeptide Y levels and leukocyte subsets in stress-exacerbated asthmatic mice.	Pubmed	4.74E-04	1.00E+00	9.99E-04	8.90E-03	1	1	NPY
Pubmed	19383261	Normal mammary gland growth and lactation capacity in pregnant relaxin-deficient mice.	Pubmed	4.74E-04	1.00E+00	9.99E-04	8.90E-03	1	1	RLN1
Pubmed	20685868	Kisspeptin directly regulates neuropeptide Y synthesis and secretion via the ERK1/2 and p38 mitogen-activated protein kinase signaling pathways in NPY-secreting hypothalamic neurons.	Pubmed	4.74E-04	1.00E+00	9.99E-04	8.90E-03	1	1	NPY
Pubmed	7486007	Development of substance P immunoreactivity in the mouse vomeronasal organ.	Pubmed	4.74E-04	1.00E+00	9.99E-04	8.90E-03	1	1	TAC1
Pubmed	11803449	Subjects with major depression or bipolar disorder show reduction of prodynorphin mRNA expression in discrete nuclei of the amygdaloid complex.	Pubmed	4.74E-04	1.00E+00	9.99E-04	8.90E-03	1	1	PDYN
Pubmed	12716746	Overexpression of PACAP in transgenic mouse pancreatic beta-cells enhances insulin secretion and ameliorates streptozotocin-induced diabetes.	Pubmed	4.74E-04	1.00E+00	9.99E-04	8.90E-03	1	1	ADCYAP1
Pubmed	27341752	Anti-atherosclerotic effects of serelaxin in apolipoprotein E-deficient mice.	Pubmed	4.74E-04	1.00E+00	9.99E-04	8.90E-03	1	1	RLN1
Pubmed	6316163	Isolation and structural organization of the human preproenkephalin B gene.	Pubmed	4.74E-04	1.00E+00	9.99E-04	8.90E-03	1	1	PDYN
Pubmed	22608025	Lack of association between two polymorphisms in the corticotropin-releasing hormone gene promoter and preterm birth in a Hispanic population.	Pubmed	4.74E-04	1.00E+00	9.99E-04	8.90E-03	1	1	CRH
Pubmed	17320051	Chronic intracerebroventricular administration of anti-neuropeptide Y antibody stimulates starvation-induced feeding via compensatory responses in the hypothalamus.	Pubmed	4.74E-04	1.00E+00	9.99E-04	8.90E-03	1	1	NPY
Pubmed	21529988	Clinicopathological findings of non-small-cell lung cancer with high serum progastrin-releasing peptide concentrations.	Pubmed	4.74E-04	1.00E+00	9.99E-04	8.90E-03	1	1	GRP
Pubmed	29328505	Substance P as a putative efferent transmitter mediates GABAergic inhibition in mouse taste buds.	Pubmed	4.74E-04	1.00E+00	9.99E-04	8.90E-03	1	1	TAC1
Pubmed	9521621	Distribution of nociceptin/orphanin FQ receptor transcript in human central nervous system and immune cells.	Pubmed	4.74E-04	1.00E+00	9.99E-04	8.90E-03	1	1	PNOC
Pubmed	15729363	Haplotype analysis of the preprotachykinin-1 (TAC1) gene in multiple sclerosis.	Pubmed	4.74E-04	1.00E+00	9.99E-04	8.90E-03	1	1	TAC1
Pubmed	19382381	Temporally restricted role of retinal PACAP: integration of the phase-advancing light signal to the SCN.	Pubmed	4.74E-04	1.00E+00	9.99E-04	8.90E-03	1	1	ADCYAP1
Pubmed	30769143	Exploring the involvement of Tac2 in the mouse hippocampal stress response through gene networking.	Pubmed	4.74E-04	1.00E+00	9.99E-04	8.90E-03	1	1	TAC3
Pubmed	20428761	Parathyroid-related protein plays a critical role in bone invasion by oral squamous cell carcinoma.	Pubmed	4.74E-04	1.00E+00	9.99E-04	8.90E-03	1	1	PTHLH
Pubmed	25856429	Substance p regulates puberty onset and fertility in the female mouse.	Pubmed	4.74E-04	1.00E+00	9.99E-04	8.90E-03	1	1	TAC1
Pubmed	23800435	Low levels of vasoactive intestinal peptide are associated with Chagas disease cardiomyopathy.	Pubmed	4.74E-04	1.00E+00	9.99E-04	8.90E-03	1	1	VIP
Pubmed	24374326	Evaluating the role of substance P in the growth of brain tumors.	Pubmed	4.74E-04	1.00E+00	9.99E-04	8.90E-03	1	1	TAC1
Pubmed	15956707	Investigating the role of relaxin in the regulation of airway fibrosis in animal models of acute and chronic allergic airway disease.	Pubmed	4.74E-04	1.00E+00	9.99E-04	8.90E-03	1	1	RLN1
Pubmed	23624317	Influence of variants in the NPY gene on obesity and metabolic syndrome features in Spanish children.	Pubmed	4.74E-04	1.00E+00	9.99E-04	8.90E-03	1	1	NPY
Pubmed	18844820	Compound heterozygosity with dominance in the Corticotropin Releasing Hormone (CRH) promoter in a case of nocturnal frontal lobe epilepsy.	Pubmed	4.74E-04	1.00E+00	9.99E-04	8.90E-03	1	1	CRH
Pubmed	19465027	Skeletal myoblasts overexpressing relaxin improve differentiation and communication of primary murine cardiomyocyte cell cultures.	Pubmed	4.74E-04	1.00E+00	9.99E-04	8.90E-03	1	1	RLN1
Pubmed	20027231	Neuropeptide Y knockout mice reveal a central role of NPY in the coordination of bone mass to body weight.	Pubmed	4.74E-04	1.00E+00	9.99E-04	8.90E-03	1	1	NPY
Pubmed	19272598	Vasoactive intestinal peptide in vaginal epithelium of patients with pelvic organ prolapse and stress urinary incontinence.	Pubmed	4.74E-04	1.00E+00	9.99E-04	8.90E-03	1	1	VIP
Pubmed	11436130	Genetic association studies of schizophrenia using the 8p21-22 genes: prepronociceptin (PNOC), neuronal nicotinic cholinergic receptor alpha polypeptide 2 (CHRNA2) and arylamine N-acetyltransferase 1 (NAT1).	Pubmed	4.74E-04	1.00E+00	9.99E-04	8.90E-03	1	1	PNOC
Pubmed	23421880	SET protein up-regulated testosterone production in the cultured preantral follicles.	Pubmed	4.74E-04	1.00E+00	9.99E-04	8.90E-03	1	1	SET
Pubmed	28168413	Early Neurobehavioral Development of Mice Lacking Endogenous PACAP.	Pubmed	4.74E-04	1.00E+00	9.99E-04	8.90E-03	1	1	ADCYAP1
Pubmed	15847953	The T1128C polymorphism of neuropeptide Y gene in a chinese population.	Pubmed	4.74E-04	1.00E+00	9.99E-04	8.90E-03	1	1	NPY
Pubmed	23724107	Characterization of corticotropin-releasing hormone neurons in the paraventricular nucleus of the hypothalamus of Crh-IRES-Cre mutant mice.	Pubmed	4.74E-04	1.00E+00	9.99E-04	8.90E-03	1	1	CRH
Pubmed	22203609	Comparative examination of inner ear in wild type and pituitary adenylate cyclase activating polypeptide (PACAP)-deficient mice.	Pubmed	4.74E-04	1.00E+00	9.99E-04	8.90E-03	1	1	ADCYAP1
Pubmed	21702022	Genetic evidence of the regulatory role of parathyroid hormone-related protein in articular chondrocyte maintenance in an experimental mouse model.	Pubmed	4.74E-04	1.00E+00	9.99E-04	8.90E-03	1	1	PTHLH
Pubmed	25331205	Disturbed release of cholecystokinin in pregnant women with hyperemesis gravidarum.	Pubmed	4.74E-04	1.00E+00	9.99E-04	8.90E-03	1	1	CCK
Pubmed	18271693	Neuromedin beta: P73T polymorphism in overweight and obese subjects.	Pubmed	4.74E-04	1.00E+00	9.99E-04	8.90E-03	1	1	NMB
Pubmed	18247361	BMP-2 regulation of PTHrP and osteoclastogenic factors during osteoblast differentiation of C2C12 cells.	Pubmed	4.74E-04	1.00E+00	9.99E-04	8.90E-03	1	1	PTHLH
Pubmed	23284101	Parathyroid hormone-related protein is a mitogenic and a survival factor of mesangial cells from male mice: role of intracrine and paracrine pathways.	Pubmed	4.74E-04	1.00E+00	9.99E-04	8.90E-03	1	1	PTHLH
Pubmed	28423013	Mapping the co-localization of the circadian proteins PER2 and BMAL1 with enkephalin and substance P throughout the rodent forebrain.	Pubmed	4.74E-04	1.00E+00	9.99E-04	8.90E-03	1	1	TAC1
Pubmed	12472887	Increased synthesis but decreased processing of neuronal proCCK in prohormone convertase 2 and 7B2 knockout animals.	Pubmed	4.74E-04	1.00E+00	9.99E-04	8.90E-03	1	1	CCK
Pubmed	23623189	Neuropeptide Y induces secretion of high-mobility group box 1 protein in mouse macrophage via PKC/ERK dependent pathway.	Pubmed	4.74E-04	1.00E+00	9.99E-04	8.90E-03	1	1	NPY
Pubmed	26164475	Periosteal PTHrP Regulates Cortical Bone Remodeling During Fracture Healing.	Pubmed	4.74E-04	1.00E+00	9.99E-04	8.90E-03	1	1	PTHLH
Pubmed	15286039	Parathyroid hormone-related protein in preeclampsia: a linkage between maternal and fetal failures.	Pubmed	4.74E-04	1.00E+00	9.99E-04	8.90E-03	1	1	PTHLH
Pubmed	11696660	Association of neuropeptide y polymorphism with the occurrence of type 1 and type 2 alcoholism.	Pubmed	4.74E-04	1.00E+00	9.99E-04	8.90E-03	1	1	NPY
Pubmed	22997493	Activated PTHLH coupling feedback phosphoinositide to G-protein receptor signal-induced cell adhesion network in human hepatocellular carcinoma by systems-theoretic analysis.	Pubmed	4.74E-04	1.00E+00	9.99E-04	8.90E-03	1	1	PTHLH
Pubmed	10770181	Leucine 7 to proline 7 polymorphism in the preproneuropeptide Y is associated with birth weight and serum triglyceride concentration in preschool aged children.	Pubmed	4.74E-04	1.00E+00	9.99E-04	8.90E-03	1	1	NPY
Pubmed	10494998	CRF-deficient mice respond like wild-type mice to hypophagic stimuli.	Pubmed	4.74E-04	1.00E+00	9.99E-04	8.90E-03	1	1	CRH
Pubmed	11511529	In situ expression of corticotropin-releasing hormone (CRH) and proopiomelanocortin (POMC) genes in human skin.	Pubmed	4.74E-04	1.00E+00	9.99E-04	8.90E-03	1	1	CRH
Pubmed	22941950	Increasing association between a neuropeptide Y promoter polymorphism and body mass index during the course of development.	Pubmed	4.74E-04	1.00E+00	9.99E-04	8.90E-03	1	1	NPY
Pubmed	21957159	Stimulation of the hypothalamic ventromedial nuclei by pituitary adenylate cyclase-activating polypeptide induces hypophagia and thermogenesis.	Pubmed	4.74E-04	1.00E+00	9.99E-04	8.90E-03	1	1	ADCYAP1
Pubmed	21508335	mTORC1 inhibition increases neurotensin secretion and gene expression through activation of the MEK/ERK/c-Jun pathway in the human endocrine cell line BON.	Pubmed	4.74E-04	1.00E+00	9.99E-04	8.90E-03	1	1	NTS
Pubmed	30150589	Signalling Alterations in Bones of Pituitary Adenylate Cyclase Activating Polypeptide (PACAP) Gene Deficient Mice.	Pubmed	4.74E-04	1.00E+00	9.99E-04	8.90E-03	1	1	ADCYAP1
Pubmed	27489037	Evidence of proteinuria, but no other characteristics of pre-eclampsia, in relaxin-deficient mice.	Pubmed	4.74E-04	1.00E+00	9.99E-04	8.90E-03	1	1	RLN1
Pubmed	11422604	A leucine(7)-to-proline(7) polymorphism in the signal peptide of neuropeptide Y was not identified in the Japanese population.	Pubmed	4.74E-04	1.00E+00	9.99E-04	8.90E-03	1	1	NPY
Pubmed	23494914	Inhibition of the canonical Wnt pathway by high glucose can be reversed by parathyroid hormone-related protein in osteoblastic cells.	Pubmed	4.74E-04	1.00E+00	9.99E-04	8.90E-03	1	1	PTHLH
Pubmed	23403409	Relationship of plasma neuropeptide Y with angiographic, electrocardiographic and coronary physiology indices of reperfusion during ST elevation myocardial infarction.	Pubmed	4.74E-04	1.00E+00	9.99E-04	8.90E-03	1	1	NPY
Pubmed	29126993	Trophic effect of PACAP on human corneal endothelium.	Pubmed	4.74E-04	1.00E+00	9.99E-04	8.90E-03	1	1	ADCYAP1
Pubmed	12239080	Impaired adaptive thermogenesis in pituitary adenylate cyclase-activating polypeptide-deficient mice.	Pubmed	4.74E-04	1.00E+00	9.99E-04	8.90E-03	1	1	ADCYAP1
Pubmed	15485137	Distribution of neuropeptide Y-immunoreactive neurons in the human brainstem, cerebellum, and cortex during development.	Pubmed	4.74E-04	1.00E+00	9.99E-04	8.90E-03	1	1	NPY
Pubmed	9877252	Hypothalamic expression of neuropeptide-Y in the New Zealand obese mouse.	Pubmed	4.74E-04	1.00E+00	9.99E-04	8.90E-03	1	1	NPY
Pubmed	14552886	Increased striatal pre-proenkephalin B expression is associated with dyskinesia in Parkinson's disease.	Pubmed	4.74E-04	1.00E+00	9.99E-04	8.90E-03	1	1	PDYN
Pubmed	24184719	Emerging novel roles of neuropeptide Y in the retina: from neuromodulation to neuroprotection.	Pubmed	4.74E-04	1.00E+00	9.99E-04	8.90E-03	1	1	NPY
Pubmed	9047294	NMR and structural model of dynorphin A (1-17) bound to dodecylphosphocholine micelles.	Pubmed	4.74E-04	1.00E+00	9.99E-04	8.90E-03	1	1	PDYN
Pubmed	22903610	Low degree of overlap between kisspeptin, neurokinin B, and dynorphin immunoreactivities in the infundibular nucleus of young male human subjects challenges the KNDy neuron concept.	Pubmed	4.74E-04	1.00E+00	9.99E-04	8.90E-03	1	1	TAC3
Pubmed	16500729	Parathyroid hormone-related protein is reduced in severe chronic heart failure.	Pubmed	4.74E-04	1.00E+00	9.99E-04	8.90E-03	1	1	PTHLH
Pubmed	15542035	Accelerated bone formation and increased osteoblast number contribute to the abnormal tooth germ development in parathyroid hormone-related protein knockout mice.	Pubmed	4.74E-04	1.00E+00	9.99E-04	8.90E-03	1	1	PTHLH
Pubmed	28060929	A Single Vector Platform for High-Level Gene Transduction of Central Neurons: Adeno-Associated Virus Vector Equipped with the Tet-Off System.	Pubmed	4.74E-04	1.00E+00	9.99E-04	8.90E-03	1	1	VIP
Pubmed	19617649	Response of hypothalamic oxytocinergic neurons to immobilization stress is not dependent on the presence of corticotrophin releasing hormone (CRH): a CRH knock-out mouse study.	Pubmed	4.74E-04	1.00E+00	9.99E-04	8.90E-03	1	1	CRH
Pubmed	17095590	Endogenous relaxin is a naturally occurring modulator of experimental renal tubulointerstitial fibrosis.	Pubmed	4.74E-04	1.00E+00	9.99E-04	8.90E-03	1	1	RLN1
Pubmed	9548509	Human monocytes and macrophages express substance P and neurokinin-1 receptor.	Pubmed	4.74E-04	1.00E+00	9.99E-04	8.90E-03	1	1	TAC1
Pubmed	20389091	Neurokinin B and its receptor in hypogonadotropic hypogonadism.	Pubmed	4.74E-04	1.00E+00	9.99E-04	8.90E-03	1	1	TAC3
Pubmed	25026432	The effect of neuropeptide Y on cell survival and neurotrophin expression in in-vitro models of Alzheimer's disease.	Pubmed	4.74E-04	1.00E+00	9.99E-04	8.90E-03	1	1	NPY
Pubmed	25591114	Fetal programming of children's obesity risk.	Pubmed	4.74E-04	1.00E+00	9.99E-04	8.90E-03	1	1	CRH
Pubmed	11792564	Disturbed tooth development in parathyroid hormone-related protein (PTHrP)-gene knockout mice.	Pubmed	4.74E-04	1.00E+00	9.99E-04	8.90E-03	1	1	PTHLH
Pubmed	15304209	Expression of neuropeptide Y is increased in murine endometrial epithelium during the peri-implantation period under regulation by sex steroids.	Pubmed	4.74E-04	1.00E+00	9.99E-04	8.90E-03	1	1	NPY
Pubmed	9364040	Knock-out mice reveal a critical antiepileptic role for neuropeptide Y.	Pubmed	4.74E-04	1.00E+00	9.99E-04	8.90E-03	1	1	NPY
Pubmed	21720755	Effects of neurotensin gene knockout in mice on the behavioral effects of cocaine.	Pubmed	4.74E-04	1.00E+00	9.99E-04	8.90E-03	1	1	NTS
Pubmed	27040796	Blood-brain barrier transport kinetics of the neuromedin peptides NMU, NMN, NMB and NT.	Pubmed	4.74E-04	1.00E+00	9.99E-04	8.90E-03	1	1	NMB
Pubmed	27911754	Cortical Control of Spatial Resolution by VIP+ Interneurons.	Pubmed	4.74E-04	1.00E+00	9.99E-04	8.90E-03	1	1	VIP
Pubmed	16909108	Bombesin induces cyclooxygenase-2 expression through the activation of the nuclear factor of activated T cells and enhances cell migration in Caco-2 colon carcinoma cells.	Pubmed	4.74E-04	1.00E+00	9.99E-04	8.90E-03	1	1	GRP
Pubmed	18561033	Urinary bladder function and somatic sensitivity in vasoactive intestinal polypeptide (VIP)-/- mice.	Pubmed	4.74E-04	1.00E+00	9.99E-04	8.90E-03	1	1	VIP
Pubmed	12359508	Diverse functions of neuropeptide Y revealed using genetically modified animals.	Pubmed	4.74E-04	1.00E+00	9.99E-04	8.90E-03	1	1	NPY
Pubmed	28402964	SET mediates TCE-induced liver cell apoptosis through dephosphorylation and upregulation of nucleolin.	Pubmed	4.74E-04	1.00E+00	9.99E-04	8.90E-03	1	1	SET
Pubmed	19854625	Neuropeptide Y (NPY) gene: Impact on emotional processing and treatment response in anxious depression.	Pubmed	4.74E-04	1.00E+00	9.99E-04	8.90E-03	1	1	NPY
Pubmed	12812047	[Peripheral nociceptin levels in Wilson disease].	Pubmed	4.74E-04	1.00E+00	9.99E-04	8.90E-03	1	1	PNOC
Pubmed	12116188	Association study of the short tandem repeat in the 5' upstream region of the cholecystokinin gene with mood disorders in the Japanese population.	Pubmed	4.74E-04	1.00E+00	9.99E-04	8.90E-03	1	1	CCK
Pubmed	22938446	Set, a putative oncogene, as a biomarker for prenatal exposure to bisphenol A.	Pubmed	4.74E-04	1.00E+00	9.99E-04	8.90E-03	1	1	SET
Pubmed	30398624	The Effect of Aging on Nerve Morphology and Substance P Expression in Mouse and Human Corneas.	Pubmed	4.74E-04	1.00E+00	9.99E-04	8.90E-03	1	1	TAC1
Pubmed	26719257	Neuropeptide Y Negatively Influences Monocyte Recruitment to the Central Nervous System during Retrovirus Infection.	Pubmed	4.74E-04	1.00E+00	9.99E-04	8.90E-03	1	1	NPY
Pubmed	19508420	VIP gene variants related to idiopathic pulmonary arterial hypertension in Chinese population.	Pubmed	4.74E-04	1.00E+00	9.99E-04	8.90E-03	1	1	VIP
Pubmed	10433210	Lower weight loss and food intake in protein-deprived, corticotropin releasing hormone-deficient mice correlate with glucocorticoid insufficiency.	Pubmed	4.74E-04	1.00E+00	9.99E-04	8.90E-03	1	1	CRH
Pubmed	1851524	Characterization of the gene and messages for vasoactive intestinal polypeptide (VIP) in rat and mouse.	Pubmed	4.74E-04	1.00E+00	9.99E-04	8.90E-03	1	1	VIP
Pubmed	23482625	Interaction of neuropeptide Y genotype and childhood emotional maltreatment on brain activity during emotional processing.	Pubmed	4.74E-04	1.00E+00	9.99E-04	8.90E-03	1	1	NPY
Pubmed	24849368	Regulating Set-?'s Subcellular Localization Toggles Its Function between Inhibiting and Promoting Axon Growth and Regeneration.	Pubmed	4.74E-04	1.00E+00	9.99E-04	8.90E-03	1	1	SET
Pubmed	21542591	Structure of monolayers formed from neurotensin and its single-site mutants: vibrational spectroscopic studies.	Pubmed	4.74E-04	1.00E+00	9.99E-04	8.90E-03	1	1	NTS
Pubmed	18629655	Pituitary adenylate cyclase-activating polypeptide (PACAP) and vasoactive intestinal peptide (VIP) regulate murine neural progenitor cell survival, proliferation, and differentiation.	Pubmed	4.74E-04	1.00E+00	9.99E-04	8.90E-03	1	1	VIP
Pubmed	9067840	Laminar distribution of neuropeptide Y-immunoreactive neurons in human prefrontal cortex during development.	Pubmed	4.74E-04	1.00E+00	9.99E-04	8.90E-03	1	1	NPY
Pubmed	29749931	High-quality ultrastructural preservation using cryofixation for 3D electron microscopy of genetically labeled tissues.	Pubmed	4.74E-04	1.00E+00	9.99E-04	8.90E-03	1	1	CRH
Pubmed	21695504	Comparison of the anti-inflammatory and anti-nociceptive effects of cortistatin-14 and somatostatin-14 in distinct in vitro and in vivo model systems.	Pubmed	4.74E-04	1.00E+00	9.99E-04	8.90E-03	1	1	CORT
Pubmed	18066654	Preparation and properties of recombinant rat and human procholecystokinin(57-95).	Pubmed	4.74E-04	1.00E+00	9.99E-04	8.90E-03	1	1	CCK
Pubmed	20876711	Parathyroid hormone-related protein enhances human ﬂ-cell proliferation and function with associated induction of cyclin-dependent kinase 2 and cyclin E expression.	Pubmed	4.74E-04	1.00E+00	9.99E-04	8.90E-03	1	1	PTHLH
Pubmed	12519865	Cortistatin rather than somatostatin as a potential endogenous ligand for somatostatin receptors in the human immune system.	Pubmed	4.74E-04	1.00E+00	9.99E-04	8.90E-03	1	1	CORT
Pubmed	27271317	Vasoactive intestinal peptide dampens formyl-peptide-induced ROS production and inflammation by targeting a MAPK-p47(phox) phosphorylation pathway in monocytes.	Pubmed	4.74E-04	1.00E+00	9.99E-04	8.90E-03	1	1	VIP
Pubmed	21601581	Inhibition of ERK phosphorylation by substance P N-terminal fragment decreases capsaicin-induced nociceptive response.	Pubmed	4.74E-04	1.00E+00	9.99E-04	8.90E-03	1	1	TAC1
Pubmed	14749007	[Change of neurokinin A plasma level in asthmatic children].	Pubmed	4.74E-04	1.00E+00	9.99E-04	8.90E-03	1	1	TAC1
Pubmed	22067363	Spatial and temporal distribution patterns of enkephalinergic neurons in adult and developing retinas of the preproenkephalin-green fluorescent protein transgenic mouse.	Pubmed	4.74E-04	1.00E+00	9.99E-04	8.90E-03	1	1	PENK
Pubmed	20530587	Prodynorphin gene deletion increased anxiety-like behaviours, impaired the anxiolytic effect of bromazepam and altered GABAA receptor subunits gene expression in the amygdala.	Pubmed	4.74E-04	1.00E+00	9.99E-04	8.90E-03	1	1	PDYN
Pubmed	8137920	Expression and characterization of VIP and two VIP mutants in NIH 3T3 cells.	Pubmed	4.74E-04	1.00E+00	9.99E-04	8.90E-03	1	1	VIP
Pubmed	17068474	CRH mediates inflammation induced by lipopolysaccharide in human adult epidermal keratinocytes.	Pubmed	4.74E-04	1.00E+00	9.99E-04	8.90E-03	1	1	CRH
Pubmed	28073937	Activity of Tachykinin1-Expressing Pet1 Raphe Neurons Modulates the Respiratory Chemoreflex.	Pubmed	4.74E-04	1.00E+00	9.99E-04	8.90E-03	1	1	TAC1
Pubmed	9477327	Rescue of the parathyroid hormone-related protein knockout mouse demonstrates that parathyroid hormone-related protein is essential for mammary gland development.	Pubmed	4.74E-04	1.00E+00	9.99E-04	8.90E-03	1	1	PTHLH
Pubmed	11501941	Association analysis of polymorphisms in the prepronociceptin gene and schizophrenia.	Pubmed	4.74E-04	1.00E+00	9.99E-04	8.90E-03	1	1	PNOC
Pubmed	15773823	Plasma nociceptin levels are reduced in migraine without aura.	Pubmed	4.74E-04	1.00E+00	9.99E-04	8.90E-03	1	1	PNOC
Pubmed	10803599	Enhanced growth of MCF-7 breast cancer cells overexpressing parathyroid hormone-related peptide.	Pubmed	4.74E-04	1.00E+00	9.99E-04	8.90E-03	1	1	PTHLH
Pubmed	28260504	The CRF Family of Neuropeptides and their Receptors - Mediators of the Central Stress Response.	Pubmed	4.74E-04	1.00E+00	9.99E-04	8.90E-03	1	1	CRH
Pubmed	20702619	Neuropeptide Y has a protective role during murine retrovirus-induced neurological disease.	Pubmed	4.74E-04	1.00E+00	9.99E-04	8.90E-03	1	1	NPY
Pubmed	15149318	Relaxin-1-deficient mice develop an age-related progression of renal fibrosis.	Pubmed	4.74E-04	1.00E+00	9.99E-04	8.90E-03	1	1	RLN1
Pubmed	26936785	Relaxin deficiency attenuates pregnancy-induced adaptation of the mesenteric artery to angiotensin II in mice.	Pubmed	4.74E-04	1.00E+00	9.99E-04	8.90E-03	1	1	RLN1
Pubmed	29907830	Substance P modulates bone remodeling properties of murine osteoblasts and osteoclasts.	Pubmed	4.74E-04	1.00E+00	9.99E-04	8.90E-03	1	1	TAC1
Pubmed	12864977	Modulation of type I IL-1 receptor and IL-1 beta mRNA expression followed by endotoxin treatment in the corticotropin-releasing hormone-deficient mouse.	Pubmed	4.74E-04	1.00E+00	9.99E-04	8.90E-03	1	1	CRH
Pubmed	18162530	Feeding and metabolism in mice lacking pituitary adenylate cyclase-activating polypeptide.	Pubmed	4.74E-04	1.00E+00	9.99E-04	8.90E-03	1	1	ADCYAP1
Pubmed	15518906	Overexpression of PACAP in the pancreas failed to rescue early postnatal mortality in PACAP-null mice.	Pubmed	4.74E-04	1.00E+00	9.99E-04	8.90E-03	1	1	ADCYAP1
Pubmed	15317855	Pituitary adenylate cyclase-activating polypeptide is required for the development of spinal sensitization and induction of neuropathic pain.	Pubmed	4.74E-04	1.00E+00	9.99E-04	8.90E-03	1	1	ADCYAP1
Pubmed	9845072	Ethanol consumption and resistance are inversely related to neuropeptide Y levels.	Pubmed	4.74E-04	1.00E+00	9.99E-04	8.90E-03	1	1	NPY
Pubmed	25921596	Suprachiasmatic neuron numbers and rest-activity circadian rhythms in older humans.	Pubmed	4.74E-04	1.00E+00	9.99E-04	8.90E-03	1	1	VIP
Pubmed	19619519	Association of the C-399T promoter polymorphism of neuropeptide Y with susceptibility to ischemic stroke.	Pubmed	4.74E-04	1.00E+00	9.99E-04	8.90E-03	1	1	NPY
Pubmed	20693670	Cloning, purification, crystallization and preliminary X-ray crystallographic analysis of SET/TAF-Iﬂ ?N from Homo sapiens.	Pubmed	4.74E-04	1.00E+00	9.99E-04	8.90E-03	1	1	SET
Pubmed	3027901	Human gastrin-releasing peptide gene maps to chromosome band 18q21.	Pubmed	4.74E-04	1.00E+00	9.99E-04	8.90E-03	1	1	GRP
Pubmed	29577471	Focal, but not global, cerebral ischaemia causes loss of myenteric neurons and upregulation of vasoactive intestinal peptide in mouse ileum.	Pubmed	4.74E-04	1.00E+00	9.99E-04	8.90E-03	1	1	VIP
Pubmed	19670271	Neuropeptide Y is expressed by osteocytes and can inhibit osteoblastic activity.	Pubmed	4.74E-04	1.00E+00	9.99E-04	8.90E-03	1	1	NPY
Pubmed	10521599	Cortistatin and somatostatin mRNAs are differentially regulated in response to kainate.	Pubmed	4.74E-04	1.00E+00	9.99E-04	8.90E-03	1	1	CORT
Pubmed	3211139	Posttranslational processing of endogenous and of baculovirus-expressed human gastrin-releasing peptide precursor.	Pubmed	4.74E-04	1.00E+00	9.99E-04	8.90E-03	1	1	GRP
Pubmed	2355920	Transcription of the rat and mouse proenkephalin genes is initiated at distinct sites in spermatogenic and somatic cells.	Pubmed	4.74E-04	1.00E+00	9.99E-04	8.90E-03	1	1	PENK
Pubmed	12424226	Relaxin deficiency in mice is associated with an age-related progression of pulmonary fibrosis.	Pubmed	4.74E-04	1.00E+00	9.99E-04	8.90E-03	1	1	RLN1
Pubmed	28263851	The effects of different exercise training modalities on plasma proenkephalin Peptide F in women.	Pubmed	4.74E-04	1.00E+00	9.99E-04	8.90E-03	1	1	PENK
Pubmed	14703707	Substance P in human tears.	Pubmed	4.74E-04	1.00E+00	9.99E-04	8.90E-03	1	1	TAC1
Pubmed	25754760	Involvement of Endogenous Enkephalins and ?-Endorphin in Feeding and Diet-Induced Obesity.	Pubmed	4.74E-04	1.00E+00	9.99E-04	8.90E-03	1	1	PENK
Pubmed	29346425	Hippocampal corticotropin-releasing hormone neurons support recognition memory and modulate hippocampal excitability.	Pubmed	4.74E-04	1.00E+00	9.99E-04	8.90E-03	1	1	CRH
Pubmed	10535410	CRH-deficient mice have a normal anorectic response to chronic stress.	Pubmed	4.74E-04	1.00E+00	9.99E-04	8.90E-03	1	1	CRH
Pubmed	23718984	Enhanced uterine artery stiffness in aged pregnant relaxin mutant mice is reversed with exogenous relaxin treatment.	Pubmed	4.74E-04	1.00E+00	9.99E-04	8.90E-03	1	1	RLN1
Pubmed	21726625	Role of endogenous pituitary adenylate cyclase activating polypeptide (PACAP) in myelination of the rodent brain: lessons from PACAP-deficient mice.	Pubmed	4.74E-04	1.00E+00	9.99E-04	8.90E-03	1	1	ADCYAP1
Pubmed	11311544	Morphine tolerance and dependence in nociceptin/orphanin FQ transgenic knock-out mice.	Pubmed	4.74E-04	1.00E+00	9.99E-04	8.90E-03	1	1	PNOC
Pubmed	21140465	Biochemical specificity of von Economo neurons in hominoids.	Pubmed	4.74E-04	1.00E+00	9.99E-04	8.90E-03	1	1	NMB
Pubmed	3025882	Structure and expression of the gene encoding the vasoactive intestinal peptide precursor.	Pubmed	4.74E-04	1.00E+00	9.99E-04	8.90E-03	1	1	VIP
Pubmed	9537322	Primary afferent tachykinins are required to experience moderate to intense pain.	Pubmed	4.74E-04	1.00E+00	9.99E-04	8.90E-03	1	1	TAC1
Pubmed	1973379	Gene for parathyroid hormone-like peptide is on mouse chromosome 6.	Pubmed	4.74E-04	1.00E+00	9.99E-04	8.90E-03	1	1	PTHLH
Pubmed	19458315	Pulse frequency-dependent gonadotropin gene expression by adenylate cyclase-activating polypeptide 1 in perifused mouse pituitary gonadotroph LbetaT2 cells.	Pubmed	4.74E-04	1.00E+00	9.99E-04	8.90E-03	1	1	ADCYAP1
Pubmed	19907206	Studies on multiple forms of proGRP in serum from small cell lung cancer patients.	Pubmed	4.74E-04	1.00E+00	9.99E-04	8.90E-03	1	1	GRP
Pubmed	1915066	A carboxyl-terminal peptide from the parathyroid hormone-related protein inhibits bone resorption by osteoclasts.	Pubmed	4.74E-04	1.00E+00	9.99E-04	8.90E-03	1	1	PTHLH
Pubmed	20352619	Acute and chronic effects of dietary fatty acids on cholecystokinin expression, storage and secretion in enteroendocrine STC-1 cells.	Pubmed	4.74E-04	1.00E+00	9.99E-04	8.90E-03	1	1	CCK
Pubmed	11906707	Identification and characterisation of functional bombesin receptors in human astrocytes.	Pubmed	4.74E-04	1.00E+00	9.99E-04	8.90E-03	1	1	GRP
Pubmed	12932169	Leucine 7 to proline 7 polymorphism of the preproneuropeptide Y gene is not associated with restenosis after coronary stenting.	Pubmed	4.74E-04	1.00E+00	9.99E-04	8.90E-03	1	1	NPY
Pubmed	21651856	[Neuropeptide Y promotes the proliferation and differentiation of 3T3-L1 preadipocytes].	Pubmed	4.74E-04	1.00E+00	9.99E-04	8.90E-03	1	1	NPY
Pubmed	19213838	Relaxin reverses airway remodeling and airway dysfunction in allergic airways disease.	Pubmed	4.74E-04	1.00E+00	9.99E-04	8.90E-03	1	1	RLN1
Pubmed	24741039	Leptin modulates the intrinsic excitability of AgRP/NPY neurons in the arcuate nucleus of the hypothalamus.	Pubmed	4.74E-04	1.00E+00	9.99E-04	8.90E-03	1	1	NPY
Pubmed	26171590	Lipid transport in cholecystokinin knockout mice.	Pubmed	4.74E-04	1.00E+00	9.99E-04	8.90E-03	1	1	CCK
Pubmed	15165988	Neuropeptide Y antagonism reduces reflex cutaneous vasoconstriction in humans.	Pubmed	4.74E-04	1.00E+00	9.99E-04	8.90E-03	1	1	NPY
Pubmed	26206287	Vasoactive intestinal peptide (VIP) differentially affects inflammatory immune responses in human monocytes infected with viable Salmonella or stimulated with LPS.	Pubmed	4.74E-04	1.00E+00	9.99E-04	8.90E-03	1	1	VIP
Pubmed	21107196	Changes in tissue substance P levels in patients with carpal tunnel syndrome.	Pubmed	4.74E-04	1.00E+00	9.99E-04	8.90E-03	1	1	TAC1
Pubmed	12383346	Regulation of peptidergic vesicle mobility by secretagogues.	Pubmed	4.74E-04	1.00E+00	9.99E-04	8.90E-03	1	1	PNOC
Pubmed	8131851	Identification of in vivo phosphorylation sites of SET, a nuclear phosphoprotein encoded by the translocation breakpoint in acute undifferentiated leukemia.	Pubmed	4.74E-04	1.00E+00	9.99E-04	8.90E-03	1	1	SET
Pubmed	23215350	siRNA screen identifies the phosphatase acting on the G protein-coupled thyrotropin-releasing hormone receptor.	Pubmed	4.74E-04	1.00E+00	9.99E-04	8.90E-03	1	1	TRH
Pubmed	12201218	Autocrine/paracrine involvement of parathyroid hormone-related peptide in vascular leiomyoma.	Pubmed	4.74E-04	1.00E+00	9.99E-04	8.90E-03	1	1	PTHLH
Pubmed	11921119	Selective loss of striatal preprotachykinin neurons in a phenocopy of Huntington's disease.	Pubmed	4.74E-04	1.00E+00	9.99E-04	8.90E-03	1	1	TAC1
Pubmed	12875921	Association between a novel polymorphism in the promoter region of the neuropeptide Y gene and schizophrenia in humans.	Pubmed	4.74E-04	1.00E+00	9.99E-04	8.90E-03	1	1	NPY
Pubmed	25677774	Effects of nociceptin and nocistatin on uterine contraction.	Pubmed	4.74E-04	1.00E+00	9.99E-04	8.90E-03	1	1	PNOC
Pubmed	9391087	Targeted expression of constitutively active receptors for parathyroid hormone and parathyroid hormone-related peptide delays endochondral bone formation and rescues mice that lack parathyroid hormone-related peptide.	Pubmed	4.74E-04	1.00E+00	9.99E-04	8.90E-03	1	1	PTHLH
Pubmed	21765902	A novel role of peripheral corticotropin-releasing hormone (CRH) on dermal fibroblasts.	Pubmed	4.74E-04	1.00E+00	9.99E-04	8.90E-03	1	1	CRH
Pubmed	12409215	The effects of pituitary adenylate cyclase-activating polypeptide on acute and chronic morphine actions in mice.	Pubmed	4.74E-04	1.00E+00	9.99E-04	8.90E-03	1	1	ADCYAP1
Pubmed	26429068	Postprandial profiles of CCK after high fat and high carbohydrate meals and the relationship to satiety in humans.	Pubmed	4.74E-04	1.00E+00	9.99E-04	8.90E-03	1	1	CCK
Pubmed	19298317	An association of prodynorphin polymorphisms and opioid dependence in females in a Chinese population.	Pubmed	4.74E-04	1.00E+00	9.99E-04	8.90E-03	1	1	PDYN
Pubmed	12853091	Impaired uterine artery blood flow at mid gestation and low levels of maternal plasma corticotropin-releasing factor.	Pubmed	4.74E-04	1.00E+00	9.99E-04	8.90E-03	1	1	CRH
Pubmed	19781916	Adult-onset hippocampal-specific neuropeptide Y overexpression confers mild anxiolytic effect in mice.	Pubmed	4.74E-04	1.00E+00	9.99E-04	8.90E-03	1	1	NPY
Pubmed	25007883	A new acro-osteolysis syndrome caused by duplications including PTHLH.	Pubmed	4.74E-04	1.00E+00	9.99E-04	8.90E-03	1	1	PTHLH
Pubmed	21324928	Expression of the nociceptin precursor and nociceptin receptor is modulated in cancer and septic patients.	Pubmed	4.74E-04	1.00E+00	9.99E-04	8.90E-03	1	1	PNOC
Pubmed	23849813	Sex-specific cell signaling: the corticotropin-releasing factor receptor model.	Pubmed	4.74E-04	1.00E+00	9.99E-04	8.90E-03	1	1	CRH
Pubmed	10812065	Pain peptides. Solution structure of orphanin FQ2.	Pubmed	4.74E-04	1.00E+00	9.99E-04	8.90E-03	1	1	PNOC
Pubmed	26657825	Multiscale alterations in bone matrix quality increased fragility in steroid induced osteoporosis.	Pubmed	4.74E-04	1.00E+00	9.99E-04	8.90E-03	1	1	CRH
Pubmed	11919172	HIV enhances substance P expression in human immune cells.	Pubmed	4.74E-04	1.00E+00	9.99E-04	8.90E-03	1	1	TAC1
Pubmed	17561835	Altered cerebellar development in mice lacking pituitary adenylate cyclase-activating polypeptide.	Pubmed	4.74E-04	1.00E+00	9.99E-04	8.90E-03	1	1	ADCYAP1
Pubmed	19931358	Stress hormone synthesis in mouse hypothalamus and adrenal gland triggered by restraint is dependent on pituitary adenylate cyclase-activating polypeptide signaling.	Pubmed	4.74E-04	1.00E+00	9.99E-04	8.90E-03	1	1	ADCYAP1
Pubmed	22243190	Mutations in the PDYN gene (SCA23) are not a frequent cause of dominant ataxia in Central Europe.	Pubmed	4.74E-04	1.00E+00	9.99E-04	8.90E-03	1	1	PDYN
Pubmed	19865784	Molecular variation in neuropeptide Y and bone mineral density among men of African ancestry.	Pubmed	4.74E-04	1.00E+00	9.99E-04	8.90E-03	1	1	NPY
Pubmed	19508428	PACAP regulates immediate catecholamine release from adrenal chromaffin cells in an activity-dependent manner through a protein kinase C-dependent pathway.	Pubmed	4.74E-04	1.00E+00	9.99E-04	8.90E-03	1	1	ADCYAP1
Pubmed	12646110	[Low prevalence of the Leu7/Pro polymorphism in the signal peptide of preproneuropeptide Y in the Spanish Mediterranean population].	Pubmed	4.74E-04	1.00E+00	9.99E-04	8.90E-03	1	1	NPY
Pubmed	10098506	Normal suppression of the reproductive axis following stress in corticotropin-releasing hormone-deficient mice.	Pubmed	4.74E-04	1.00E+00	9.99E-04	8.90E-03	1	1	CRH
Pubmed	23615431	Gastrin-releasing peptide-expressing nerves comprise subsets of human cutaneous A? and C fibers that may sense pruritus.	Pubmed	4.74E-04	1.00E+00	9.99E-04	8.90E-03	1	1	GRP
Pubmed	20615973	Correlated memory defects and hippocampal dendritic spine loss after acute stress involve corticotropin-releasing hormone signaling.	Pubmed	4.74E-04	1.00E+00	9.99E-04	8.90E-03	1	1	CRH
Pubmed	11159841	Nuclear forms of parathyroid hormone-related peptide are translated from non-AUG start sites downstream from the initiator methionine.	Pubmed	4.74E-04	1.00E+00	9.99E-04	8.90E-03	1	1	PTHLH
Pubmed	22202166	Pro-GRP-derived peptides are expressed in colorectal cancer cells and tumors and are biologically active in vivo.	Pubmed	4.74E-04	1.00E+00	9.99E-04	8.90E-03	1	1	GRP
Pubmed	24072746	Parathyroid hormone-related protein drives a CD11b+Gr1+ cell-mediated positive feedback loop to support prostate cancer growth.	Pubmed	4.74E-04	1.00E+00	9.99E-04	8.90E-03	1	1	PTHLH
Pubmed	8938591	The role of fetal parathyroid hormone-related protein in transplacental calcium transport.	Pubmed	4.74E-04	1.00E+00	9.99E-04	8.90E-03	1	1	PTHLH
Pubmed	27595593	Loss of hypothalamic corticotropin-releasing hormone markedly reduces anxiety behaviors in mice.	Pubmed	4.74E-04	1.00E+00	9.99E-04	8.90E-03	1	1	CRH
Pubmed	21917383	Genetic modulation of plasma NPY stress response is suppressed in substance abuse: association with clinical outcomes.	Pubmed	4.74E-04	1.00E+00	9.99E-04	8.90E-03	1	1	NPY
Pubmed	20428965	VIP and PACAP effects on mouse major pelvic ganglia neurons.	Pubmed	4.74E-04	1.00E+00	9.99E-04	8.90E-03	1	1	VIP
Pubmed	18241322	Analysis of single nucleotide polymorphisms and haplotypes in the neuropeptide Y gene: no evidence for association with alcoholism in a German population sample.	Pubmed	4.74E-04	1.00E+00	9.99E-04	8.90E-03	1	1	NPY
Pubmed	24555657	Stable SET knockdown in head and neck squamous cell carcinoma promotes cell invasion and the mesenchymal-like phenotype in vitro, as well as necrosis, cisplatin sensitivity and lymph node metastasis in xenograft tumor models.	Pubmed	4.74E-04	1.00E+00	9.99E-04	8.90E-03	1	1	SET
Pubmed	15923061	Attenuated feeding responses to circadian and palatability cues in mice lacking neuropeptide Y.	Pubmed	4.74E-04	1.00E+00	9.99E-04	8.90E-03	1	1	NPY
Pubmed	30104181	Neurotensin contributes to pediatric intestinal failure-associated liver disease via regulating intestinal bile acids uptake.	Pubmed	4.74E-04	1.00E+00	9.99E-04	8.90E-03	1	1	NTS
Pubmed	27469060	Neuropeptide Y associated with asthma in young adults.	Pubmed	4.74E-04	1.00E+00	9.99E-04	8.90E-03	1	1	NPY
Pubmed	1904138	High levels of thyrotropin-releasing hormone precursor peptide immunoreactivity and binding substance occur in human cerebrospinal fluid.	Pubmed	4.74E-04	1.00E+00	9.99E-04	8.90E-03	1	1	TRH
Pubmed	19342773	Crystallization of the receptor-binding domain of parathyroid hormone-related protein in complex with a neutralizing monoclonal antibody Fab fragment.	Pubmed	4.74E-04	1.00E+00	9.99E-04	8.90E-03	1	1	PTHLH
Pubmed	24660773	Substance P at the neuro-immune crosstalk in the modulation of inflammation, asthma and antimicrobial host defense.	Pubmed	4.74E-04	1.00E+00	9.99E-04	8.90E-03	1	1	TAC1
Pubmed	18346455	PACAP decides neuronal laminar fate via PKA signaling in the developing cerebral cortex.	Pubmed	4.74E-04	1.00E+00	9.99E-04	8.90E-03	1	1	ADCYAP1
Pubmed	29130940	Neuropeptide Y regulates a vascular gateway for hematopoietic stem and progenitor cells.	Pubmed	4.74E-04	1.00E+00	9.99E-04	8.90E-03	1	1	NPY
Pubmed	24025258	Targeting inhibitor 2 of protein phosphatase 2A as a therapeutic strategy for prostate cancer treatment.	Pubmed	4.74E-04	1.00E+00	9.99E-04	8.90E-03	1	1	SET
Pubmed	23937065	Haploinsufficiency of endogenous parathyroid hormone-related peptide impairs bone fracture healing.	Pubmed	4.74E-04	1.00E+00	9.99E-04	8.90E-03	1	1	PTHLH
Pubmed	23608754	Autophagy mediates paracrine regulation of vascular endothelial cells.	Pubmed	4.74E-04	1.00E+00	9.99E-04	8.90E-03	1	1	GRP
Pubmed	3770210	cDNA sequence of human beta-preprotachykinin, the common precursor to substance P and neurokinin A.	Pubmed	4.74E-04	1.00E+00	9.99E-04	8.90E-03	1	1	TAC1
Pubmed	21310194	Plasma nociceptin/orphanin FQ levels are lower in patients with chronic ischemic cardiovascular diseases--A pilot study.	Pubmed	4.74E-04	1.00E+00	9.99E-04	8.90E-03	1	1	PNOC
Pubmed	12531470	A subset of nociceptin/orphanin FQ receptor-expressing neurons in the anterior hypothalamic area, as revealed in mice with lacZ reporter gene.	Pubmed	4.74E-04	1.00E+00	9.99E-04	8.90E-03	1	1	PNOC
Pubmed	26987580	Identification of a novel interaction between corticotropin releasing hormone (Crh) and macroautophagy.	Pubmed	4.74E-04	1.00E+00	9.99E-04	8.90E-03	1	1	CRH
Pubmed	19046942	Aberrant silencing of the endocrine peptide gene tachykinin-1 in gastric cancer.	Pubmed	4.74E-04	1.00E+00	9.99E-04	8.90E-03	1	1	TAC1
Pubmed	20454520	Substance P in polymicrobial sepsis: molecular fingerprint of lung injury in preprotachykinin-A-/- mice.	Pubmed	4.74E-04	1.00E+00	9.99E-04	8.90E-03	1	1	TAC1
Pubmed	25470549	A parabrachial-hypothalamic cholecystokinin neurocircuit controls counterregulatory responses to hypoglycemia.	Pubmed	4.74E-04	1.00E+00	9.99E-04	8.90E-03	1	1	CCK
Pubmed	21382455	Association between heroin dependence and prodynorphin gene polymorphisms.	Pubmed	4.74E-04	1.00E+00	9.99E-04	8.90E-03	1	1	PDYN
Pubmed	25061562	Stress- and diet-induced fat gain is controlled by NPY in catecholaminergic neurons.	Pubmed	4.74E-04	1.00E+00	9.99E-04	8.90E-03	1	1	NPY
Pubmed	12618303	Deletion of the preprotachykinin A gene in mice does not reduce scratching behavior elicited by intradermal serotonin.	Pubmed	4.74E-04	1.00E+00	9.99E-04	8.90E-03	1	1	TAC1
Pubmed	24000330	Neurotensin modulates the migratory and inflammatory response of macrophages under hyperglycemic conditions.	Pubmed	4.74E-04	1.00E+00	9.99E-04	8.90E-03	1	1	NTS
Pubmed	18098289	Induction of colitis and rapid development of colorectal tumors in mice deficient in the neuropeptide PACAP.	Pubmed	4.74E-04	1.00E+00	9.99E-04	8.90E-03	1	1	ADCYAP1
Pubmed	12716420	Alternative splicing in single cells dissected from complex tissues: separate expression of prepro-tachykinin A mRNA splice variants in sensory neurones.	Pubmed	4.74E-04	1.00E+00	9.99E-04	8.90E-03	1	1	TAC1
Pubmed	25714031	High neuropeptide Y release associates with Ewing sarcoma bone dissemination - in vivo model of site-specific metastases.	Pubmed	4.74E-04	1.00E+00	9.99E-04	8.90E-03	1	1	NPY
Pubmed	2549037	Purification and characterization of recombinant human parathyroid hormone-related protein.	Pubmed	4.74E-04	1.00E+00	9.99E-04	8.90E-03	1	1	PTHLH
Pubmed	22745236	Parathyroid hormone-related protein: an update.	Pubmed	4.74E-04	1.00E+00	9.99E-04	8.90E-03	1	1	PTHLH
Pubmed	3862083	Differential expression of the mouse cholecystokinin gene during brain and gut development.	Pubmed	4.74E-04	1.00E+00	9.99E-04	8.90E-03	1	1	CCK
Pubmed	17558285	NPY mediates basal and seizure-induced proliferation in the subcallosal zone.	Pubmed	4.74E-04	1.00E+00	9.99E-04	8.90E-03	1	1	NPY
Pubmed	27720230	Neuropeptide Y accelerates post-fracture bone healing by promoting osteogenesis of mesenchymal stem cells.	Pubmed	4.74E-04	1.00E+00	9.99E-04	8.90E-03	1	1	NPY
Pubmed	1557184	Gastrin releasing peptide (GRP) binding sites in human bronchi.	Pubmed	4.74E-04	1.00E+00	9.99E-04	8.90E-03	1	1	GRP
Pubmed	23873242	Substance P stimulates production of inflammatory cytokines in human disc cells.	Pubmed	4.74E-04	1.00E+00	9.99E-04	8.90E-03	1	1	TAC1
Pubmed	1720612	Bombesin, neuromedin B and neuromedin C interact with a common rat pancreatic phosphoinositide-coupled receptor, but are differentially regulated by guanine nucleotides.	Pubmed	4.74E-04	1.00E+00	9.99E-04	8.90E-03	1	1	NMB
Pubmed	20648632	Human NPY promoter variation rs16147:T>C as a moderator of prefrontal NPY gene expression and negative affect.	Pubmed	4.74E-04	1.00E+00	9.99E-04	8.90E-03	1	1	NPY
Pubmed	24189487	The biology of Nociceptin/Orphanin FQ (N/OFQ) related to obesity, stress, anxiety, mood, and drug dependence.	Pubmed	4.74E-04	1.00E+00	9.99E-04	8.90E-03	1	1	PNOC
Pubmed	23915857	Vasoactive intestinal peptide expression in the vaginal anterior wall of patients with pelvic organ prolapse.	Pubmed	4.74E-04	1.00E+00	9.99E-04	8.90E-03	1	1	VIP
Pubmed	12371703	Solution structure of nociceptin peptides.	Pubmed	4.74E-04	1.00E+00	9.99E-04	8.90E-03	1	1	PNOC
Pubmed	20844958	The expression of PTHLH in human gastric mucosa enterochromaffin-like cells.	Pubmed	4.74E-04	1.00E+00	9.99E-04	8.90E-03	1	1	PTHLH
Pubmed	27599771	Polymorphism of neuropeptide Y gene rs16147 modifies the response to a hypocaloric diet on cardiovascular risk biomarkers and adipokines.	Pubmed	4.74E-04	1.00E+00	9.99E-04	8.90E-03	1	1	NPY
Pubmed	23428580	Autocrine effects of neuromedin B stimulate the proliferation of rat primary osteoblasts.	Pubmed	4.74E-04	1.00E+00	9.99E-04	8.90E-03	1	1	NMB
Pubmed	12578734	The role of substance P in cerebral ischemia.	Pubmed	4.74E-04	1.00E+00	9.99E-04	8.90E-03	1	1	TAC1
Pubmed	20626567	Corticotrophin-releasing factor gene transcription is directly activated after deprivation of glucocorticoids in hypothalamic cells.	Pubmed	4.74E-04	1.00E+00	9.99E-04	8.90E-03	1	1	CRH
Pubmed	7704301	Evidence for two neurochemical divisions in the human nucleus accumbens.	Pubmed	4.74E-04	1.00E+00	9.99E-04	8.90E-03	1	1	PENK
Pubmed	8608863	Haploinsufficiency of parathyroid hormone-related peptide (PTHrP) results in abnormal postnatal bone development.	Pubmed	4.74E-04	1.00E+00	9.99E-04	8.90E-03	1	1	PTHLH
Pubmed	27212399	Vasoactive Intestinal Peptide modulates trophoblast-derived cell line function and interaction with phagocytic cells through autocrine pathways.	Pubmed	4.74E-04	1.00E+00	9.99E-04	8.90E-03	1	1	VIP
Pubmed	23436714	Nanoparticles exposing neurotensin tumor-specific drivers.	Pubmed	4.74E-04	1.00E+00	9.99E-04	8.90E-03	1	1	NTS
Pubmed	17726225	Blockage of VIP during mouse embryogenesis modifies adult behavior and results in permanent changes in brain chemistry.	Pubmed	4.74E-04	1.00E+00	9.99E-04	8.90E-03	1	1	VIP
Pubmed	28088445	Synthesis and exploration of novel radiolabeled bombesin peptides for targeting receptor positive tumor.	Pubmed	4.74E-04	1.00E+00	9.99E-04	8.90E-03	1	1	GRP
Pubmed	21172866	Substance P is a key mediator of stress-induced protection from allergic sensitization via modified antigen presentation.	Pubmed	4.74E-04	1.00E+00	9.99E-04	8.90E-03	1	1	TAC1
Pubmed	3038549	Isolation and characterization of neurokinin A, neurokinin A(3-10) and neurokinin A(4-10) from a neutral water extract of a metastatic ileal carcinoid tumour.	Pubmed	4.74E-04	1.00E+00	9.99E-04	8.90E-03	1	1	TAC1
Pubmed	18385673	Genetic variation in human NPY expression affects stress response and emotion.	Pubmed	4.74E-04	1.00E+00	9.99E-04	8.90E-03	1	1	NPY
Pubmed	17360516	Relationship between the structure of SET/TAF-Ibeta/INHAT and its histone chaperone activity.	Pubmed	4.74E-04	1.00E+00	9.99E-04	8.90E-03	1	1	SET
Pubmed	11906533	A combined pharmacological and genetic approach to investigate the role of orphanin FQ in learning and memory.	Pubmed	4.74E-04	1.00E+00	9.99E-04	8.90E-03	1	1	PNOC
Pubmed	21815197	The neuropeptide VIP regulates the expression of osteoclastogenic factors in osteoblasts.	Pubmed	4.74E-04	1.00E+00	9.99E-04	8.90E-03	1	1	VIP
Pubmed	14747236	Leucine 7 to proline 7 polymorphism in the preproneuropeptide Y is associated with proteinuria, coronary heart disease, and glycemic control in type 1 diabetic patients.	Pubmed	4.74E-04	1.00E+00	9.99E-04	8.90E-03	1	1	NPY
Pubmed	6589611	Cloning, characterization, and DNA sequence of a human cDNA encoding neuropeptide tyrosine.	Pubmed	4.74E-04	1.00E+00	9.99E-04	8.90E-03	1	1	NPY
Pubmed	12865351	Adenovirus-mediated expression of human prorelaxin promotes the invasive potential of canine mammary cancer cells.	Pubmed	4.74E-04	1.00E+00	9.99E-04	8.90E-03	1	1	RLN1
Pubmed	2783917	Preprocorticotropin releasing hormone: cDNA sequence and in vitro processing.	Pubmed	4.74E-04	1.00E+00	9.99E-04	8.90E-03	1	1	CRH
Pubmed	18007586	Potentiation of ATP- and bradykinin-induced [Ca2+]c responses by PTHrP peptides in the HaCaT cell line.	Pubmed	4.74E-04	1.00E+00	9.99E-04	8.90E-03	1	1	PTHLH
Pubmed	21385308	The arcuate nucleus and neuropeptide Y contribute to the antitumorigenic effect of calorie restriction.	Pubmed	4.74E-04	1.00E+00	9.99E-04	8.90E-03	1	1	NPY
Pubmed	19437412	Dynamic up-regulation of prodynorphin transcription in temporal lobe epilepsy.	Pubmed	4.74E-04	1.00E+00	9.99E-04	8.90E-03	1	1	PDYN
Pubmed	23339175	Functional role of vasoactive intestinal polypeptide in inhibitory motor innervation in the mouse internal anal sphincter.	Pubmed	4.74E-04	1.00E+00	9.99E-04	8.90E-03	1	1	VIP
Pubmed	14503917	Elevation of circulating plasma cytokines in cancer patients with high plasma parathyroid hormone-related protein levels.	Pubmed	4.74E-04	1.00E+00	9.99E-04	8.90E-03	1	1	PTHLH
Pubmed	23598374	Alterations in PACAP-38-like immunoreactivity in the plasma during ictal and interictal periods of migraine patients.	Pubmed	4.74E-04	1.00E+00	9.99E-04	8.90E-03	1	1	ADCYAP1
Pubmed	15020071	Nociceptin/orphanin FQ modulates human T cell function in vitro.	Pubmed	4.74E-04	1.00E+00	9.99E-04	8.90E-03	1	1	PNOC
Pubmed	15030536	Circulating nociceptin levels during the cluster headache period.	Pubmed	4.74E-04	1.00E+00	9.99E-04	8.90E-03	1	1	PNOC
Pubmed	27269961	Distinct Functional Groups Emerge from the Intrinsic Properties of Molecularly Identified Entorhinal Interneurons and Principal Cells.	Pubmed	4.74E-04	1.00E+00	9.99E-04	8.90E-03	1	1	VIP
Pubmed	28714876	Sustained Low Serum Substance P Levels in Non-Surviving Septic Patients.	Pubmed	4.74E-04	1.00E+00	9.99E-04	8.90E-03	1	1	TAC1
Pubmed	9525987	Excess corticotropin releasing hormone-binding protein in the hypothalamic-pituitary-adrenal axis in transgenic mice.	Pubmed	4.74E-04	1.00E+00	9.99E-04	8.90E-03	1	1	CRH
Pubmed	17307643	Reduced alcohol consumption in mice lacking preprodynorphin.	Pubmed	4.74E-04	1.00E+00	9.99E-04	8.90E-03	1	1	PDYN
Pubmed	20687402	Isolated idiopathic central hypothyroidism in an adult, possibly caused by thyrotropin releasing hormone (TRH) deficiency.	Pubmed	4.74E-04	1.00E+00	9.99E-04	8.90E-03	1	1	TRH
Pubmed	23074243	Central nervous system neuropeptide Y signaling via the Y1 receptor partially dissociates feeding behavior from lipoprotein metabolism in lean rats.	Pubmed	4.74E-04	1.00E+00	9.99E-04	8.90E-03	1	1	NPY
Pubmed	29353060	Parathyroid Hormone-Related Protein Contributes to Early Healing of Habu Snake Venom-Induced Glomerulonephritis in Mice.	Pubmed	4.74E-04	1.00E+00	9.99E-04	8.90E-03	1	1	PTHLH
Pubmed	20034524	Pituitary adenylate cyclase-activating polypeptide ameliorates cisplatin-induced acute kidney injury.	Pubmed	4.74E-04	1.00E+00	9.99E-04	8.90E-03	1	1	ADCYAP1
Pubmed	23248581	Desensitization, trafficking, and resensitization of the pituitary thyrotropin-releasing hormone receptor.	Pubmed	4.74E-04	1.00E+00	9.99E-04	8.90E-03	1	1	TRH
Pubmed	15664786	The role of central corticotropin-releasing hormone in the anorexic and endocrine effects of the bacterial T cell superantigen, Staphylococcal enterotoxin A.	Pubmed	4.74E-04	1.00E+00	9.99E-04	8.90E-03	1	1	CRH
Pubmed	30302539	Gene expression and neurochemical characterization of the rostromedial tegmental nucleus (RMTg) in rats and mice.	Pubmed	4.74E-04	1.00E+00	9.99E-04	8.90E-03	1	1	PNOC
Pubmed	16505386	Delayed testicular aging in pituitary adenylate cyclase-activating peptide (PACAP) null mice.	Pubmed	4.74E-04	1.00E+00	9.99E-04	8.90E-03	1	1	ADCYAP1
Pubmed	26218633	Serum Proenkephalin A Levels and Mortality After Long-Term Follow-Up in Patients with Type 2 Diabetes Mellitus (ZODIAC-32).	Pubmed	4.74E-04	1.00E+00	9.99E-04	8.90E-03	1	1	PENK
Pubmed	23148993	Ingested (oral) thyrotropin releasing factor (TRH) inhibits EAE.	Pubmed	4.74E-04	1.00E+00	9.99E-04	8.90E-03	1	1	TRH
Pubmed	28215987	Accelerated retinal aging in PACAP knock-out mice.	Pubmed	4.74E-04	1.00E+00	9.99E-04	8.90E-03	1	1	ADCYAP1
Pubmed	19898633	Plasma cytokine profiles in preprotachykinin-A knockout mice subjected to polymicrobial sepsis.	Pubmed	4.74E-04	1.00E+00	9.99E-04	8.90E-03	1	1	TAC1
Pubmed	12972328	Modulation of corticotropin-releasing hormone receptor type 2 mRNA expression by CRH deficiency or stress in the mouse heart.	Pubmed	4.74E-04	1.00E+00	9.99E-04	8.90E-03	1	1	CRH
Pubmed	18434372	Neuropeptide Y mediates the initial hypothalamic-pituitary-adrenal response to maternal separation in the neonatal mouse.	Pubmed	4.74E-04	1.00E+00	9.99E-04	8.90E-03	1	1	NPY
Pubmed	30080182	Recurrent hypoglycemia inhibits the counterregulatory response by suppressing adrenal activity.	Pubmed	4.74E-04	1.00E+00	9.99E-04	8.90E-03	1	1	NPY
Pubmed	11922768	Characterization of an antibody Fv fragment that binds to the human, but not to the rat neurotensin receptor NTS-1.	Pubmed	4.74E-04	1.00E+00	9.99E-04	8.90E-03	1	1	NTS
Pubmed	8800640	Characterization of human relaxin gene regulation in the relaxin-expressing human prostate adenocarcinoma cell line LNCaP.FGC.	Pubmed	4.74E-04	1.00E+00	9.99E-04	8.90E-03	1	1	RLN1
Pubmed	17997355	Parathyroid hormone-related protein (PTHrP) signal cascade modulates myocardial dysfunction in the pressure overloaded heart.	Pubmed	4.74E-04	1.00E+00	9.99E-04	8.90E-03	1	1	PTHLH
Pubmed	11879796	Endogenous parathyroid hormone-related protein functions as a neuroprotective agent.	Pubmed	4.74E-04	1.00E+00	9.99E-04	8.90E-03	1	1	PTHLH
Pubmed	18163347	Substance P is associated with heart enlargement and apoptosis in murine dilated cardiomyopathy induced by Taenia crassiceps infection.	Pubmed	4.74E-04	1.00E+00	9.99E-04	8.90E-03	1	1	TAC1
Pubmed	29779950	The Striatum Organizes 3D Behavior via Moment-to-Moment Action Selection.	Pubmed	4.74E-04	1.00E+00	9.99E-04	8.90E-03	1	1	PDYN
Pubmed	16782213	Effect of cholecystokinin on feeding is attenuated in monosodium glutamate obese mice.	Pubmed	4.74E-04	1.00E+00	9.99E-04	8.90E-03	1	1	CCK
Pubmed	2881252	A frequent Pvu II RFLP of the human gastrin releasing peptide gene.	Pubmed	4.74E-04	1.00E+00	9.99E-04	8.90E-03	1	1	GRP
Pubmed	17151217	Disrupted neuronal activity rhythms in the suprachiasmatic nuclei of vasoactive intestinal polypeptide-deficient mice.	Pubmed	4.74E-04	1.00E+00	9.99E-04	8.90E-03	1	1	VIP
Pubmed	30155495	The Anti-Inflammatory Mediator, Vasoactive Intestinal Peptide, Modulates the Differentiation and Function of Th Subsets in Rheumatoid Arthritis.	Pubmed	4.74E-04	1.00E+00	9.99E-04	8.90E-03	1	1	VIP
Pubmed	21521424	Prodynorphin CpG-SNPs associated with alcohol dependence: elevated methylation in the brain of human alcoholics.	Pubmed	4.74E-04	1.00E+00	9.99E-04	8.90E-03	1	1	PDYN
Pubmed	22634872	Regulation of peripheral clock to oscillation of substance P contributes to circadian inflammatory pain.	Pubmed	4.74E-04	1.00E+00	9.99E-04	8.90E-03	1	1	TAC1
Pubmed	25053227	Molecular mechanisms associated with PTHrP-induced proliferation of colon cancer cells.	Pubmed	4.74E-04	1.00E+00	9.99E-04	8.90E-03	1	1	PTHLH
Pubmed	15217792	Selective deficits in the circadian light response in mice lacking PACAP.	Pubmed	4.74E-04	1.00E+00	9.99E-04	8.90E-03	1	1	ADCYAP1
Pubmed	17425335	Improved chemical synthesis and demonstration of the relaxin receptor binding affinity and biological activity of mouse relaxin.	Pubmed	4.74E-04	1.00E+00	9.99E-04	8.90E-03	1	1	RLN1
Pubmed	25883113	A Novel CCK-8/GLP-1 Hybrid Peptide Exhibiting Prominent Insulinotropic, Glucose-Lowering, and Satiety Actions With Significant Therapeutic Potential in High-Fat-Fed Mice.	Pubmed	4.74E-04	1.00E+00	9.99E-04	8.90E-03	1	1	CCK
Pubmed	27175972	Cortistatin Is a Key Factor Regulating the Sex-Dependent Response of the GH and Stress Axes to Fasting in Mice.	Pubmed	4.74E-04	1.00E+00	9.99E-04	8.90E-03	1	1	CORT
Pubmed	20049852	Impact of growth factors and PTHrP on early and late chondrogenic differentiation of human mesenchymal stem cells.	Pubmed	4.74E-04	1.00E+00	9.99E-04	8.90E-03	1	1	PTHLH
Pubmed	21321264	In vitro and in vivo evaluation of 64Cu-labeled SarAr-bombesin analogs in gastrin-releasing peptide receptor-expressing prostate cancer.	Pubmed	4.74E-04	1.00E+00	9.99E-04	8.90E-03	1	1	GRP
Pubmed	16254028	Endogenous relaxin regulates collagen deposition in an animal model of allergic airway disease.	Pubmed	4.74E-04	1.00E+00	9.99E-04	8.90E-03	1	1	RLN1
Pubmed	26341936	Event-related potentials in performance monitoring are influenced by the endogenous opioid system.	Pubmed	4.74E-04	1.00E+00	9.99E-04	8.90E-03	1	1	PDYN
Pubmed	1312203	Preprotachykinin gene expression in the human basal ganglia: characterization of mRNAs and pre-mRNAs produced by alternate RNA splicing.	Pubmed	4.74E-04	1.00E+00	9.99E-04	8.90E-03	1	1	TAC1
Pubmed	11914038	Association of leucine 7 to proline 7 polymorphism in the preproneuropeptide Y with serum lipids in patients with coronary heart disease.	Pubmed	4.74E-04	1.00E+00	9.99E-04	8.90E-03	1	1	NPY
Pubmed	17317195	Neuropeptide Y is important for basal and seizure-induced precursor cell proliferation in the hippocampus.	Pubmed	4.74E-04	1.00E+00	9.99E-04	8.90E-03	1	1	NPY
Pubmed	28101970	Neuropeptide Y resists excess loss of fat by lipolysis in calorie-restricted mice: a trait potential for the life-extending effect of calorie restriction.	Pubmed	4.74E-04	1.00E+00	9.99E-04	8.90E-03	1	1	NPY
Pubmed	19031275	Exploring the relationship of second-trimester corticotropin releasing hormone, chronic stress and preterm delivery.	Pubmed	4.74E-04	1.00E+00	9.99E-04	8.90E-03	1	1	CRH
Pubmed	18426836	Variable number of tandem repeats polymorphism in parathyroid hormone-related protein as predictor of peak bone mass in young healthy Finnish males.	Pubmed	4.74E-04	1.00E+00	9.99E-04	8.90E-03	1	1	PTHLH
Pubmed	23613811	Pituitary adenylate cyclase activating peptide deficient mice exhibit impaired thymic and extrathymic regulatory T cell proliferation during EAE.	Pubmed	4.74E-04	1.00E+00	9.99E-04	8.90E-03	1	1	ADCYAP1
Pubmed	19861584	Interactions between neurotensin and GnRH neurons in the positive feedback control of GnRH/LH secretion in the mouse.	Pubmed	4.74E-04	1.00E+00	9.99E-04	8.90E-03	1	1	NTS
Pubmed	25841321	Atomoxetine reverses locomotor hyperactivity, impaired novel object recognition, and prepulse inhibition impairment in mice lacking pituitary adenylate cyclase-activating polypeptide.	Pubmed	4.74E-04	1.00E+00	9.99E-04	8.90E-03	1	1	ADCYAP1
Pubmed	25496164	Expression of gastrin-releasing peptide by excitatory interneurons in the mouse superficial dorsal horn.	Pubmed	4.74E-04	1.00E+00	9.99E-04	8.90E-03	1	1	GRP
Pubmed	16148159	Differential calcium regulation of proinflammatory activities in human neutrophils exposed to the neuropeptide pituitary adenylate cyclase-activating protein.	Pubmed	4.74E-04	1.00E+00	9.99E-04	8.90E-03	1	1	ADCYAP1
Pubmed	18403481	Corticotropin-releasing hormone deficiency is associated with reduced local inflammation in a mouse model of experimental colitis.	Pubmed	4.74E-04	1.00E+00	9.99E-04	8.90E-03	1	1	CRH
Pubmed	15207335	Endogenous neurotensin facilitates visceral nociception and is required for stress-induced antinociception in mice and rats.	Pubmed	4.74E-04	1.00E+00	9.99E-04	8.90E-03	1	1	NTS
Pubmed	21725597	The set gene is a potential oncogene in human colorectal adenocarcinoma and oral squamous cell carcinoma.	Pubmed	4.74E-04	1.00E+00	9.99E-04	8.90E-03	1	1	SET
Pubmed	11835385	A functional polymorphism in the prodynorphin gene promotor is associated with temporal lobe epilepsy.	Pubmed	4.74E-04	1.00E+00	9.99E-04	8.90E-03	1	1	PDYN
Pubmed	24409325	Serum levels of vasoactive intestinal peptide as a prognostic marker in early arthritis.	Pubmed	4.74E-04	1.00E+00	9.99E-04	8.90E-03	1	1	VIP
Pubmed	11193856	Organization of the rat PACAP gene.	Pubmed	4.74E-04	1.00E+00	9.99E-04	8.90E-03	1	1	ADCYAP1
Pubmed	19376095	Corticotropin releasing factor (CRF) modulates fear-induced alterations in sleep in mice.	Pubmed	4.74E-04	1.00E+00	9.99E-04	8.90E-03	1	1	CRH
Pubmed	24054546	Functional bombesin receptors in urinary tract of rats and human but not of pigs and mice, an in vitro study.	Pubmed	4.74E-04	1.00E+00	9.99E-04	8.90E-03	1	1	NMB
Pubmed	26055202	Association analysis for corticotropin releasing hormone polymorphisms with the risk of major depressive disorder and the response to antidepressants.	Pubmed	4.74E-04	1.00E+00	9.99E-04	8.90E-03	1	1	CRH
Pubmed	19932148	Neurotensin expression and outcome of malignant pleural mesothelioma.	Pubmed	4.74E-04	1.00E+00	9.99E-04	8.90E-03	1	1	NTS
Pubmed	9048639	Parathyroid hormone-related protein-(107-139) inhibits bone resorption in vivo.	Pubmed	4.74E-04	1.00E+00	9.99E-04	8.90E-03	1	1	PTHLH
Pubmed	18379031	[PTHrP and cancer cachexia].	Pubmed	4.74E-04	1.00E+00	9.99E-04	8.90E-03	1	1	PTHLH
Pubmed	24836507	Intermittent PTHrP(1-34) exposure augments chondrogenesis and reduces hypertrophy of mesenchymal stromal cells.	Pubmed	4.74E-04	1.00E+00	9.99E-04	8.90E-03	1	1	PTHLH
Pubmed	20145205	The midregion, nuclear localization sequence, and C terminus of PTHrP regulate skeletal development, hematopoiesis, and survival in mice.	Pubmed	4.74E-04	1.00E+00	9.99E-04	8.90E-03	1	1	PTHLH
Pubmed	28071586	Milestones in CRH Research.	Pubmed	4.74E-04	1.00E+00	9.99E-04	8.90E-03	1	1	CRH
Pubmed	12450317	Role of corticotropin-releasing hormone in ovarian steroidogenesis.	Pubmed	4.74E-04	1.00E+00	9.99E-04	8.90E-03	1	1	CRH
Pubmed	22143534	Accumulation of the SET protein in HEK293T cells and mild oxidative stress: cell survival or death signaling.	Pubmed	4.74E-04	1.00E+00	9.99E-04	8.90E-03	1	1	SET
Pubmed	20435026	Age and sex dependent genetic effects of neuropeptide Y promoter polymorphism on susceptibility to ischemic stroke in Koreans.	Pubmed	4.74E-04	1.00E+00	9.99E-04	8.90E-03	1	1	NPY
Pubmed	25453484	Low neuropeptide Y in cerebrospinal fluid in bipolar patients is associated with previous and prospective suicide attempts.	Pubmed	4.74E-04	1.00E+00	9.99E-04	8.90E-03	1	1	NPY
Pubmed	25775546	Neuropeptide Y stimulates autophagy in hypothalamic neurons.	Pubmed	4.74E-04	1.00E+00	9.99E-04	8.90E-03	1	1	NPY
Pubmed	22318412	Mapping of alpha-neo-endorphin- and neurokinin B-immunoreactivity in the human brainstem.	Pubmed	4.74E-04	1.00E+00	9.99E-04	8.90E-03	1	1	TAC3
Pubmed	16390370	No association between the -399 C > T polymorphism of the neuropeptide Y gene and schizophrenia, unipolar depression or panic disorder in a Danish population.	Pubmed	4.74E-04	1.00E+00	9.99E-04	8.90E-03	1	1	NPY
Pubmed	21445087	Effect of VIP on the balance between cytokines and master regulators of activated helper T cells.	Pubmed	4.74E-04	1.00E+00	9.99E-04	8.90E-03	1	1	VIP
Pubmed	22882375	Overexpression of corticotropin-releasing factor in Barrington's nucleus neurons by adeno-associated viral transduction: effects on bladder function and behavior.	Pubmed	4.74E-04	1.00E+00	9.99E-04	8.90E-03	1	1	CRH
Pubmed	12689610	NPY attenuates positive cortical DC-potential shift upon food intake in man.	Pubmed	4.74E-04	1.00E+00	9.99E-04	8.90E-03	1	1	NPY
Pubmed	25094033	Lifelong, central corticotropin-releasing factor (CRF) overexpression is associated with individual differences in cocaine-induced conditioned place preference.	Pubmed	4.74E-04	1.00E+00	9.99E-04	8.90E-03	1	1	CRH
Pubmed	12034130	The neurocircuitry and receptor subtypes mediating anxiolytic-like effects of neuropeptide Y.	Pubmed	4.74E-04	1.00E+00	9.99E-04	8.90E-03	1	1	NPY
Pubmed	24777663	The paracrine feedback loop between vitamin D? (1,25(OH)?D?) and PTHrP in prehypertrophic chondrocytes.	Pubmed	4.74E-04	1.00E+00	9.99E-04	8.90E-03	1	1	PTHLH
Pubmed	18035445	Plasma relaxin concentration is related to beta-cell function and insulin sensitivity in women with type 2 diabetes mellitus.	Pubmed	4.74E-04	1.00E+00	9.99E-04	8.90E-03	1	1	RLN1
Pubmed	10461921	Processing of rat preprocortistatin in mouse AtT-20 cells.	Pubmed	4.74E-04	1.00E+00	9.99E-04	8.90E-03	1	1	CORT
Pubmed	19211874	Population encoding by circadian clock neurons organizes circadian behavior.	Pubmed	4.74E-04	1.00E+00	9.99E-04	8.90E-03	1	1	VIP
Pubmed	11579206	Targeted disruption of the pituitary adenylate cyclase-activating polypeptide gene results in early postnatal death associated with dysfunction of lipid and carbohydrate metabolism.	Pubmed	4.74E-04	1.00E+00	9.99E-04	8.90E-03	1	1	ADCYAP1
Pubmed	22291434	Nuclear localization of parathyroid hormone-related peptide confers resistance to anoikis in prostate cancer cells.	Pubmed	4.74E-04	1.00E+00	9.99E-04	8.90E-03	1	1	PTHLH
Pubmed	16359808	Effects of environmental and pharmacological stressors on c-fos and corticotropin-releasing factor mRNA in rat brain: Relationship to the reinstatement of alcohol seeking.	Pubmed	4.74E-04	1.00E+00	9.99E-04	8.90E-03	1	1	CRH
Pubmed	12858040	Delayed epileptogenesis in nociceptin/orphanin FQ-deficient mice.	Pubmed	4.74E-04	1.00E+00	9.99E-04	8.90E-03	1	1	PNOC
Pubmed	22378876	Thyrotropin-releasing hormone (TRH) inhibits melanin-concentrating hormone neurons: implications for TRH-mediated anorexic and arousal actions.	Pubmed	4.74E-04	1.00E+00	9.99E-04	8.90E-03	1	1	TRH
Pubmed	12210735	Role of c-fos in the regulation of type X collagen gene expression by PTH and PTHrP: localization of a PTH/PTHrP-responsive region in the human COL10A1 enhancer.	Pubmed	4.74E-04	1.00E+00	9.99E-04	8.90E-03	1	1	PTHLH
Pubmed	26640227	Report of two novel mutations in PTHLH associated with brachydactyly type E and literature review.	Pubmed	4.74E-04	1.00E+00	9.99E-04	8.90E-03	1	1	PTHLH
Pubmed	23277265	Association of a functional polymorphism in neuropeptide Y with antipsychotic-induced weight gain in schizophrenia patients.	Pubmed	4.74E-04	1.00E+00	9.99E-04	8.90E-03	1	1	NPY
Pubmed	16621157	Proenkephalin A 119-159, a stable proenkephalin A precursor fragment identified in human circulation.	Pubmed	4.74E-04	1.00E+00	9.99E-04	8.90E-03	1	1	PENK
Pubmed	17264209	Substance P mediates antiapoptotic responses in human colonocytes by Akt activation.	Pubmed	4.74E-04	1.00E+00	9.99E-04	8.90E-03	1	1	TAC1
Pubmed	8396010	Parathyroid hormone-related peptide production and action in a myoepithelial cell line derived from normal human breast.	Pubmed	4.74E-04	1.00E+00	9.99E-04	8.90E-03	1	1	PTHLH
Pubmed	19028839	Direct interaction between the inhibitor 2 and ceramide via sphingolipid-protein binding is involved in the regulation of protein phosphatase 2A activity and signaling.	Pubmed	4.74E-04	1.00E+00	9.99E-04	8.90E-03	1	1	SET
Pubmed	1729392	Posttranslational processing of proenkephalin in SK-N-MC cells: evidence for phosphorylation.	Pubmed	4.74E-04	1.00E+00	9.99E-04	8.90E-03	1	1	PENK
Pubmed	7647472	Localization of the thyrotropin-releasing hormone gene, Trh, on mouse chromosome 6.	Pubmed	4.74E-04	1.00E+00	9.99E-04	8.90E-03	1	1	TRH
Pubmed	27305846	Environmental enrichment induces behavioural disturbances in neuropeptide Y knockout mice.	Pubmed	4.74E-04	1.00E+00	9.99E-04	8.90E-03	1	1	NPY
Pubmed	28677734	Overexpression of SET oncoprotein is associated with tumor progression and poor prognosis in human gastric cancer.	Pubmed	4.74E-04	1.00E+00	9.99E-04	8.90E-03	1	1	SET
Pubmed	21468772	Of mice and men: neuropeptide Y and its receptors are associated with atherosclerotic lesion burden and vulnerability.	Pubmed	4.74E-04	1.00E+00	9.99E-04	8.90E-03	1	1	NPY
Pubmed	22210745	c-myc and skp2 coordinate p27 degradation, vascular smooth muscle proliferation, and neointima formation induced by the parathyroid hormone-related protein.	Pubmed	4.74E-04	1.00E+00	9.99E-04	8.90E-03	1	1	PTHLH
Pubmed	24976214	A role for Tac2, NkB, and Nk3 receptor in normal and dysregulated fear memory consolidation.	Pubmed	4.74E-04	1.00E+00	9.99E-04	8.90E-03	1	1	TAC3
Pubmed	28379296	Relaxin treatment reduces angiotensin II-induced vasoconstriction in pregnancy and protects against endothelial dysfunction?.	Pubmed	4.74E-04	1.00E+00	9.99E-04	8.90E-03	1	1	RLN1
Pubmed	16221860	Anorexigenic hormones leptin, insulin, and alpha-melanocyte-stimulating hormone directly induce neurotensin (NT) gene expression in novel NT-expressing cell models.	Pubmed	4.74E-04	1.00E+00	9.99E-04	8.90E-03	1	1	NTS
Pubmed	11807842	Polygenic expression of somatostatin in the sturgeon Acipenser transmontanus: molecular cloning and distribution of the mRNAs encoding two somatostatin precursors.	Pubmed	4.74E-04	1.00E+00	9.99E-04	8.90E-03	1	1	CORT
Pubmed	17347252	Endogenous dynorphin in epileptogenesis and epilepsy: anticonvulsant net effect via kappa opioid receptors.	Pubmed	4.74E-04	1.00E+00	9.99E-04	8.90E-03	1	1	PDYN
Pubmed	12239106	Temperature-sensitive phenotype in mice lacking pituitary adenylate cyclase-activating polypeptide.	Pubmed	4.74E-04	1.00E+00	9.99E-04	8.90E-03	1	1	ADCYAP1
Pubmed	22768175	CRF induces intestinal epithelial barrier injury via the release of mast cell proteases and TNF-?.	Pubmed	4.74E-04	1.00E+00	9.99E-04	8.90E-03	1	1	CRH
Pubmed	16888146	Clues to VIP function from knockout mice.	Pubmed	4.74E-04	1.00E+00	9.99E-04	8.90E-03	1	1	VIP
Pubmed	11104584	Morphine Up-regulates expression of substance P and its receptor in human blood mononuclear phagocytes and lymphocytes.	Pubmed	4.74E-04	1.00E+00	9.99E-04	8.90E-03	1	1	TAC1
Pubmed	7508121	Overexpression of parathyroid hormone-related protein in the skin of transgenic mice interferes with hair follicle development.	Pubmed	4.74E-04	1.00E+00	9.99E-04	8.90E-03	1	1	PTHLH
Pubmed	21945803	Substance P induces CCN1 expression via histone deacetylase activity in human colonic epithelial cells.	Pubmed	4.74E-04	1.00E+00	9.99E-04	8.90E-03	1	1	TAC1
Pubmed	26296898	Interictal plasma pituitary adenylate cyclase-activating polypeptide levels are decreased in migraineurs but remain unchanged in patients with tension-type headache.	Pubmed	4.74E-04	1.00E+00	9.99E-04	8.90E-03	1	1	ADCYAP1
Pubmed	23478074	Expression of corticotrophin-releasing hormone and its receptor in patients with intrahepatic cholestasis of pregnancy.	Pubmed	4.74E-04	1.00E+00	9.99E-04	8.90E-03	1	1	CRH
Pubmed	12850281	Prostate cancer cell type-specific regulation of the human PTHrP gene via a negative VDRE.	Pubmed	4.74E-04	1.00E+00	9.99E-04	8.90E-03	1	1	PTHLH
Pubmed	28298361	Intrarenal signaling mediated by CCK plays a role in salt intake-induced natriuresis.	Pubmed	4.74E-04	1.00E+00	9.99E-04	8.90E-03	1	1	CCK
Pubmed	12427862	Diminished anxiety- and depression-related behaviors in mice with selective deletion of the Tac1 gene.	Pubmed	4.74E-04	1.00E+00	9.99E-04	8.90E-03	1	1	TAC1
Pubmed	21939768	Dysfunction of neurogenic VIP-mediated relaxation in mouse distal colon with dextran sulfate sodium-induced colitis.	Pubmed	4.74E-04	1.00E+00	9.99E-04	8.90E-03	1	1	VIP
Pubmed	25920420	Neuropeptide Y levels are associated with nutritional status and cardiovascular events in adults with chronic kidney disease.	Pubmed	4.74E-04	1.00E+00	9.99E-04	8.90E-03	1	1	NPY
Pubmed	28151936	Promoter Methylation Pattern Controls Corticotropin Releasing Hormone Gene Activity in Human Trophoblasts.	Pubmed	4.74E-04	1.00E+00	9.99E-04	8.90E-03	1	1	CRH
Pubmed	9604864	Hypothalamic corticotropin-releasing hormone is a mediator of the anorexigenic effect of leptin.	Pubmed	4.74E-04	1.00E+00	9.99E-04	8.90E-03	1	1	CRH
Pubmed	20438764	Modulation of the CRH system by substance P/NKA in an animal model of depression.	Pubmed	4.74E-04	1.00E+00	9.99E-04	8.90E-03	1	1	TAC1
Pubmed	27634731	No Change in Interictal PACAP Levels in Peripheral Blood in Women With Chronic Migraine.	Pubmed	4.74E-04	1.00E+00	9.99E-04	8.90E-03	1	1	ADCYAP1
Pubmed	19660865	Role of substance P signaling in enhanced nociceptive sensitization and local cytokine production after incision.	Pubmed	4.74E-04	1.00E+00	9.99E-04	8.90E-03	1	1	TAC1
Pubmed	28342003	Lung carcinoma progression and survival versus amino- and carboxyl-parathyroid hormone-related protein expression.	Pubmed	4.74E-04	1.00E+00	9.99E-04	8.90E-03	1	1	PTHLH
Pubmed	10921074	[The discovery of pituitary adenylate cyclase activating polypeptide (PACAP) and its research progress].	Pubmed	4.74E-04	1.00E+00	9.99E-04	8.90E-03	1	1	ADCYAP1
Pubmed	23379566	Human gastrin-releasing peptide triggers growth of HepG2 cells through blocking endoplasmic reticulum stress-mediated apoptosis.	Pubmed	4.74E-04	1.00E+00	9.99E-04	8.90E-03	1	1	GRP
Pubmed	28606038	Site-related Effects of Relaxin in the Gastrointestinal Tract Through Nitric Oxide Signalling: An Updated Report.	Pubmed	4.74E-04	1.00E+00	9.99E-04	8.90E-03	1	1	RLN1
Pubmed	15837012	Polymorphisms of the cholecystokinin gene promoter region in suicide victims in Japan.	Pubmed	4.74E-04	1.00E+00	9.99E-04	8.90E-03	1	1	CCK
Pubmed	16888188	Protective role for plasmid DNA-mediated VIP gene transfer in non-obese diabetic mice.	Pubmed	4.74E-04	1.00E+00	9.99E-04	8.90E-03	1	1	VIP
Pubmed	18507649	Sputum neurokinin A in Egyptian asthmatic children and adolescents: relation to exacerbation severity.	Pubmed	4.74E-04	1.00E+00	9.99E-04	8.90E-03	1	1	TAC1
Pubmed	16503654	Three-dimensional structure of neuropeptide k bound to dodecylphosphocholine micelles.	Pubmed	4.74E-04	1.00E+00	9.99E-04	8.90E-03	1	1	TAC1
Pubmed	18184762	Pituitary adenylate cyclase-activating polypeptide maintains neonatal breathing but not metabolism during mild reductions in ambient temperature.	Pubmed	4.74E-04	1.00E+00	9.99E-04	8.90E-03	1	1	ADCYAP1
Pubmed	11931383	Expression of Set-alpha during morphogenesis of mouse lower first molar.	Pubmed	4.74E-04	1.00E+00	9.99E-04	8.90E-03	1	1	SET
Pubmed	17365745	Cholecystokinin C-45T polymorphism and smoking cessation in women.	Pubmed	4.74E-04	1.00E+00	9.99E-04	8.90E-03	1	1	CCK
Pubmed	23110814	Neuronal circuits involving neuropeptide Y in hypothalamic arcuate nucleus-mediated feeding regulation.	Pubmed	4.74E-04	1.00E+00	9.99E-04	8.90E-03	1	1	NPY
Pubmed	15048918	PACAP promotes neural stem cell proliferation in adult mouse brain.	Pubmed	4.74E-04	1.00E+00	9.99E-04	8.90E-03	1	1	ADCYAP1
Pubmed	29494882	Neuropeptide Y, stressful life events and personality trait conscientiousness: Preliminary associations from a Swedish longitudinal study.	Pubmed	4.74E-04	1.00E+00	9.99E-04	8.90E-03	1	1	NPY
Pubmed	19950799	Regulation of vasoactive intestinal peptide and substance P in the human pyloric sphincter.	Pubmed	4.74E-04	1.00E+00	9.99E-04	8.90E-03	1	1	VIP
Pubmed	20413378	Assessment of nociceptin/orphanin FQ and micro-opioid receptor mRNA in the human right atrium.	Pubmed	4.74E-04	1.00E+00	9.99E-04	8.90E-03	1	1	PNOC
Pubmed	26250996	Reduction in NPY-positive neurons and dysregulation of excitability in young senescence-accelerated mouse prone 8 (SAMP8) hippocampus precede the onset of cognitive impairment.	Pubmed	4.74E-04	1.00E+00	9.99E-04	8.90E-03	1	1	NPY
Pubmed	8816783	Targeted overexpression of parathyroid hormone-related peptide in chondrocytes causes chondrodysplasia and delayed endochondral bone formation.	Pubmed	4.74E-04	1.00E+00	9.99E-04	8.90E-03	1	1	PTHLH
Pubmed	12782203	Decreased hypothalamic concentration of neuropeptide Y correlates with onset of hyperphagia in fa/fa rats on postnatal day 12.	Pubmed	4.74E-04	1.00E+00	9.99E-04	8.90E-03	1	1	NPY
Pubmed	25285650	Pancreatic islet neuropeptide Y overexpression has minimal effect on islet morphology and ?-cell adaptation to high-fat diet.	Pubmed	4.74E-04	1.00E+00	9.99E-04	8.90E-03	1	1	NPY
Pubmed	21775817	Methylation of specific CpG sites in the P2 promoter of parathyroid hormone-related protein determines the invasive potential of breast cancer cell lines.	Pubmed	4.74E-04	1.00E+00	9.99E-04	8.90E-03	1	1	PTHLH
Pubmed	12427860	Involvement of the neuropeptide nociceptin/orphanin FQ in kainate seizures.	Pubmed	4.74E-04	1.00E+00	9.99E-04	8.90E-03	1	1	PNOC
Pubmed	11168450	Corticotropin-releasing hormone binding to the syncytiotrophoblast membranes.	Pubmed	4.74E-04	1.00E+00	9.99E-04	8.90E-03	1	1	CRH
Pubmed	12352616	Quantitative analysis of nociceptin in blood of patients with acute and chronic pain.	Pubmed	4.74E-04	1.00E+00	9.99E-04	8.90E-03	1	1	PNOC
Pubmed	28315308	Target-specific alterations in the VIP inhibitory drive to hippocampal GABAergic cells after status epilepticus.	Pubmed	4.74E-04	1.00E+00	9.99E-04	8.90E-03	1	1	VIP
Pubmed	18572150	Spatial distribution of corticotropin-releasing factor immunopositive climbing fibers in the mouse cerebellum: analysis by whole mount immunohistochemistry.	Pubmed	4.74E-04	1.00E+00	9.99E-04	8.90E-03	1	1	CRH
Pubmed	11555839	A polymorphism in the regulatory region of the corticotropin-releasing hormone gene in relation to cortisol secretion, obesity, and gene-gene interaction.	Pubmed	4.74E-04	1.00E+00	9.99E-04	8.90E-03	1	1	CRH
Pubmed	23593457	Functional characterization of a CRH missense mutation identified in an ADNFLE family.	Pubmed	4.74E-04	1.00E+00	9.99E-04	8.90E-03	1	1	CRH
Pubmed	21908647	Substance P induces adverse myocardial remodelling via a mechanism involving cardiac mast cells.	Pubmed	4.74E-04	1.00E+00	9.99E-04	8.90E-03	1	1	TAC1
Pubmed	17430171	Vasoactive intestinal peptide in neurodevelopmental disorders: therapeutic potential.	Pubmed	4.74E-04	1.00E+00	9.99E-04	8.90E-03	1	1	VIP
Pubmed	23395721	Responses of proenkephalin Peptide F to aerobic exercise stress in the plasma and white blood cell biocompartments.	Pubmed	4.74E-04	1.00E+00	9.99E-04	8.90E-03	1	1	PENK
Pubmed	29453754	PACAP38 in human models of primary headaches.	Pubmed	4.74E-04	1.00E+00	9.99E-04	8.90E-03	1	1	ADCYAP1
Pubmed	28711627	Vasoactive Intestinal Polypeptide and Mast Cells Regulate Increased Passage of Colonic Bacteria in Patients With Irritable Bowel Syndrome.	Pubmed	4.74E-04	1.00E+00	9.99E-04	8.90E-03	1	1	VIP
Pubmed	29133846	Large scale matching of function to the genetic identity of retinal ganglion cells.	Pubmed	4.74E-04	1.00E+00	9.99E-04	8.90E-03	1	1	CRH
Pubmed	15922491	Nociceptin/orphanin FQ stimulates human monocyte chemotaxis via NOP receptor activation.	Pubmed	4.74E-04	1.00E+00	9.99E-04	8.90E-03	1	1	PNOC
Pubmed	21482764	Tonic inhibition of chronic pain by neuropeptide Y.	Pubmed	4.74E-04	1.00E+00	9.99E-04	8.90E-03	1	1	NPY
Pubmed	8577931	PreproPACAP-derived peptides occur in VIP-producing tumours and co-exist with VIP.	Pubmed	4.74E-04	1.00E+00	9.99E-04	8.90E-03	1	1	ADCYAP1
Pubmed	30458061	A Heterozygous Splice-Site Mutation in PTHLH Causes Autosomal Dominant Shortening of Metacarpals and Metatarsals.	Pubmed	4.74E-04	1.00E+00	9.99E-04	8.90E-03	1	1	PTHLH
Pubmed	19723659	Parathyroid hormone-related protein protects against mammary tumor emergence and is associated with monocyte infiltration in ductal carcinoma in situ.	Pubmed	4.74E-04	1.00E+00	9.99E-04	8.90E-03	1	1	PTHLH
Pubmed	15585758	Neuromedin beta: a strong candidate gene linking eating behaviors and susceptibility to obesity.	Pubmed	4.74E-04	1.00E+00	9.99E-04	8.90E-03	1	1	NMB
Pubmed	3856870	Molecular cloning of the human cholecystokinin gene by use of a synthetic probe containing deoxyinosine.	Pubmed	4.74E-04	1.00E+00	9.99E-04	8.90E-03	1	1	CCK
Pubmed	20417255	MPTP treatment increases expression of pre-pro-nociceptin/orphanin FQ mRNA in a subset of substantia nigra reticulata neurons.	Pubmed	4.74E-04	1.00E+00	9.99E-04	8.90E-03	1	1	PNOC
Pubmed	25014004	An enriched environment ameliorates memory impairments in PACAP-deficient mice.	Pubmed	4.74E-04	1.00E+00	9.99E-04	8.90E-03	1	1	ADCYAP1
Pubmed	18316078	Deficits in social behavior and reversal learning are more prevalent in male offspring of VIP deficient female mice.	Pubmed	4.74E-04	1.00E+00	9.99E-04	8.90E-03	1	1	VIP
Pubmed	20309012	New insights into the role of VIP on the ratio of T-cell subsets during the development of autoimmune diabetes.	Pubmed	4.74E-04	1.00E+00	9.99E-04	8.90E-03	1	1	VIP
Pubmed	15317475	Three dimensional structure of mammalian tachykinin peptide neurokinin B bound to lipid micelles.	Pubmed	4.74E-04	1.00E+00	9.99E-04	8.90E-03	1	1	TAC3
Pubmed	14764629	Role of signal transducer and activator of transcription 3 in regulation of hypothalamic trh gene expression by leptin.	Pubmed	4.74E-04	1.00E+00	9.99E-04	8.90E-03	1	1	TRH
Pubmed	18923396	A functional haplotype implicated in vulnerability to develop cocaine dependence is associated with reduced PDYN expression in human brain.	Pubmed	4.74E-04	1.00E+00	9.99E-04	8.90E-03	1	1	PDYN
Pubmed	6288173	CCK-8-Immunoreactivity distribution in human brain: selective decrease in the substantia nigra from parkinsonian patients.	Pubmed	4.74E-04	1.00E+00	9.99E-04	8.90E-03	1	1	CCK
Pubmed	8603595	Expression and function of proenkephalin A messenger ribonucleic acid in murine fetal thymocytes.	Pubmed	4.74E-04	1.00E+00	9.99E-04	8.90E-03	1	1	PENK
Pubmed	16042989	Nociceptin/orphanin FQ inhibits electrically induced contractions of the human bronchus via NOP receptor activation.	Pubmed	4.74E-04	1.00E+00	9.99E-04	8.90E-03	1	1	PNOC
Pubmed	23373458	Is thyrotropin-releasing hormone a novel neuroendocrine modulator of keratin expression in human skin?	Pubmed	4.74E-04	1.00E+00	9.99E-04	8.90E-03	1	1	TRH
Pubmed	17307297	Temporal and spatial expression of preprotachykinin A mRNA in the developing filial mice brain after maternal administration of monosodium glutamate at a late stage of pregnancy.	Pubmed	4.74E-04	1.00E+00	9.99E-04	8.90E-03	1	1	TAC1
Pubmed	14743366	Mutational analysis of neurotensin in familial restless legs syndrome.	Pubmed	4.74E-04	1.00E+00	9.99E-04	8.90E-03	1	1	NTS
Pubmed	14614912	Region selective up-regulation of micro-, delta- and kappa-opioid receptors but not opioid receptor-like 1 receptors in the brains of enkephalin and dynorphin knockout mice.	Pubmed	4.74E-04	1.00E+00	9.99E-04	8.90E-03	1	1	PDYN
Pubmed	11935374	TH2 lymphocytes secrete functional VIP upon antigen stimulation.	Pubmed	4.74E-04	1.00E+00	9.99E-04	8.90E-03	1	1	VIP
Pubmed	21527296	Effects of neuromedin-? on caloric compensation, eating behaviours and habitual food intake.	Pubmed	4.74E-04	1.00E+00	9.99E-04	8.90E-03	1	1	NMB
Pubmed	24286592	Substance P in heart failure: the good and the bad.	Pubmed	4.74E-04	1.00E+00	9.99E-04	8.90E-03	1	1	TAC1
Pubmed	3670596	Neurotensin in the human brain.	Pubmed	4.74E-04	1.00E+00	9.99E-04	8.90E-03	1	1	NTS
Pubmed	18780300	Preproenkephalin mRNA is expressed in a subpopulation of GABAergic neurons in the spinal dorsal horn of the GAD67-GFP knock-in mouse.	Pubmed	4.74E-04	1.00E+00	9.99E-04	8.90E-03	1	1	PENK
Pubmed	23349895	Cholecystokinin revisited: CCK and the hunger trap in anorexia nervosa.	Pubmed	4.74E-04	1.00E+00	9.99E-04	8.90E-03	1	1	CCK
Pubmed	22955522	Inhibited PTHLH downstream leukocyte adhesion-mediated protein amino acid N-linked glycosylation coupling Notch and JAK-STAT cascade to iron-sulfur cluster assembly-induced aging network in no-tumor hepatitis/cirrhotic tissues (HBV or HCV infection) by systems-theoretical analysis.	Pubmed	4.74E-04	1.00E+00	9.99E-04	8.90E-03	1	1	PTHLH
Pubmed	19481799	Rapid change of neuropeptide Y levels and gene-expression in the brain of ovariectomized mice after administration of 17beta-estradiol.	Pubmed	4.74E-04	1.00E+00	9.99E-04	8.90E-03	1	1	NPY
Pubmed	25109664	Neuropeptide Y activity in the nucleus accumbens modulates feeding behavior and neuronal activity.	Pubmed	4.74E-04	1.00E+00	9.99E-04	8.90E-03	1	1	NPY
Pubmed	22719854	A novel pathway regulates thyroid hormone availability in rat and human hypothalamic neurosecretory neurons.	Pubmed	4.74E-04	1.00E+00	9.99E-04	8.90E-03	1	1	TRH
Pubmed	22615845	VIP deficient mice exhibit resistance to lipopolysaccharide induced endotoxemia with an intrinsic defect in proinflammatory cellular responses.	Pubmed	4.74E-04	1.00E+00	9.99E-04	8.90E-03	1	1	VIP
Pubmed	9856827	PTHrP regulates epidermal differentiation in adult mice.	Pubmed	4.74E-04	1.00E+00	9.99E-04	8.90E-03	1	1	PTHLH
Pubmed	27208493	Evidence for the involvement of neuropeptide Y in the antidepressant effect of imipramine in type 2 diabetes.	Pubmed	4.74E-04	1.00E+00	9.99E-04	8.90E-03	1	1	NPY
Pubmed	21030593	Characterization of promoter elements regulating the expression of the human neurotensin/neuromedin N gene.	Pubmed	4.74E-04	1.00E+00	9.99E-04	8.90E-03	1	1	NTS
Pubmed	20082139	E1A oncogene expression inhibits PTHrP P3 promoter activity and sensitizes human prostate cancer cells to TNF-induced apoptosis.	Pubmed	4.74E-04	1.00E+00	9.99E-04	8.90E-03	1	1	PTHLH
Pubmed	12852260	Parathyroid hormone-related protein (PTHrP): a nucleocytoplasmic shuttling protein with distinct paracrine and intracrine roles.	Pubmed	4.74E-04	1.00E+00	9.99E-04	8.90E-03	1	1	PTHLH
Pubmed	29623045	Relaxin Deficiency Leads to Uterine Artery Dysfunction During Pregnancy in Mice.	Pubmed	4.74E-04	1.00E+00	9.99E-04	8.90E-03	1	1	RLN1
Pubmed	16298826	Use of imatinib mesylate for favorable control of hypercalcemia mediated by parathyroid hormone-related protein in a patient with chronic myelogenous leukemia at blast phase.	Pubmed	4.74E-04	1.00E+00	9.99E-04	8.90E-03	1	1	PTHLH
Pubmed	19094085	Changes in prodynorphin gene expression and neuronal morphology in the hypothalamus of postmenopausal women.	Pubmed	4.74E-04	1.00E+00	9.99E-04	8.90E-03	1	1	PDYN
Pubmed	8294483	Identification and characterization of SET, a nuclear phosphoprotein encoded by the translocation break point in acute undifferentiated leukemia.	Pubmed	4.74E-04	1.00E+00	9.99E-04	8.90E-03	1	1	SET
Pubmed	21736916	Alcohol dependence, disinhibited behavior and variation in the prodynorphin gene.	Pubmed	4.74E-04	1.00E+00	9.99E-04	8.90E-03	1	1	PDYN
Pubmed	10619566	Corticotropin releasing factor in the embryonic mouse cerebellum.	Pubmed	4.74E-04	1.00E+00	9.99E-04	8.90E-03	1	1	CRH
Pubmed	21303710	The 1258 G>A polymorphism in the neuropeptide Y gene is associated with greater alcohol consumption in a Mediterranean population.	Pubmed	4.74E-04	1.00E+00	9.99E-04	8.90E-03	1	1	NPY
Pubmed	29277323	Epigenetic Changes in the CRH Gene are Related to Severity of Suicide Attempt and a General Psychiatric Risk Score in Adolescents.	Pubmed	4.74E-04	1.00E+00	9.99E-04	8.90E-03	1	1	CRH
Pubmed	22143932	Neuropeptide Y innervation in the vaginal mucosa among patients with pelvic organ prolapse.	Pubmed	4.74E-04	1.00E+00	9.99E-04	8.90E-03	1	1	NPY
Pubmed	10520752	Isolation and structural and genetic analysis of the mouse enkephalin gene and its d(AC/TG)n repeats.	Pubmed	4.74E-04	1.00E+00	9.99E-04	8.90E-03	1	1	PENK
Pubmed	16274263	Ancient and recent positive selection transformed opioid cis-regulation in humans.	Pubmed	4.74E-04	1.00E+00	9.99E-04	8.90E-03	1	1	PDYN
Pubmed	15956756	Evolution of the relaxin-like peptide family: from neuropeptide to reproduction.	Pubmed	4.74E-04	1.00E+00	9.99E-04	8.90E-03	1	1	RLN1
Pubmed	23524276	Expression of hypothalamic regulatory peptides in thyroid C cells of different mammals.	Pubmed	4.74E-04	1.00E+00	9.99E-04	8.90E-03	1	1	TRH
Pubmed	21079395	Extensive changes in the expression of the opioid genes between humans and chimpanzees.	Pubmed	4.74E-04	1.00E+00	9.99E-04	8.90E-03	1	1	PNOC
Pubmed	23353988	Serum gastrin-releasing peptide levels correlate with pruritus in patients with atopic dermatitis.	Pubmed	4.74E-04	1.00E+00	9.99E-04	8.90E-03	1	1	GRP
Pubmed	19633131	Potential immunomodulatory role of VIP in the implantation sites of prediabetic nonobese diabetic mice.	Pubmed	4.74E-04	1.00E+00	9.99E-04	8.90E-03	1	1	VIP
Pubmed	15664365	Quantification of the bombesin/gastrin releasing peptide antagonist RC-3095 by liquid chromatography-tandem mass spectrometry.	Pubmed	4.74E-04	1.00E+00	9.99E-04	8.90E-03	1	1	GRP
Pubmed	3259914	Human corticotropin releasing hormone gene is located on the long arm of chromosome 8.	Pubmed	4.74E-04	1.00E+00	9.99E-04	8.90E-03	1	1	CRH
Pubmed	28741471	Altered paracrine signaling from the injured knee joint impairs postnatal long bone growth.	Pubmed	4.74E-04	1.00E+00	9.99E-04	8.90E-03	1	1	PTHLH
Pubmed	17785854	Hydrogen sulfide up-regulates substance P in polymicrobial sepsis-associated lung injury.	Pubmed	4.74E-04	1.00E+00	9.99E-04	8.90E-03	1	1	TAC1
Pubmed	21849543	Fasting and 17?-estradiol differentially modulate the M-current in neuropeptide Y neurons.	Pubmed	4.74E-04	1.00E+00	9.99E-04	8.90E-03	1	1	NPY
Pubmed	7962548	Severe microcephaly induced by blockade of vasoactive intestinal peptide function in the primitive neuroepithelium of the mouse.	Pubmed	4.74E-04	1.00E+00	9.99E-04	8.90E-03	1	1	VIP
Pubmed	15328193	Expression of thyrotropin-releasing hormone by human melanoma and nevi.	Pubmed	4.74E-04	1.00E+00	9.99E-04	8.90E-03	1	1	TRH
Pubmed	12081635	The single nucleotide polymorphism T1128C in the signal peptide of neuropeptide Y (NPY) was not identified in a Korean population.	Pubmed	4.74E-04	1.00E+00	9.99E-04	8.90E-03	1	1	NPY
Pubmed	1436492	Cloning of human neurotensin/neuromedin N genomic sequences and expression in the ventral mesencephalon of schizophrenics and age/sex matched controls.	Pubmed	4.74E-04	1.00E+00	9.99E-04	8.90E-03	1	1	NTS
Pubmed	9357452	T helper 2 cytokines induce preproenkephalin mRNA expression and proenkephalin A in human peripheral blood mononuclear cells.	Pubmed	4.74E-04	1.00E+00	9.99E-04	8.90E-03	1	1	PENK
Pubmed	28450265	Construct and face validity of a new model for the three-hit theory of depression using PACAP mutant mice on CD1 background.	Pubmed	4.74E-04	1.00E+00	9.99E-04	8.90E-03	1	1	ADCYAP1
Pubmed	19258402	Patterns of plasma corticotropin-releasing hormone, progesterone, estradiol, and estriol change and the onset of human labor.	Pubmed	4.74E-04	1.00E+00	9.99E-04	8.90E-03	1	1	CRH
Pubmed	3262120	Isolation and characterization of a corticotropin-releasing hormone-like peptide from human placenta.	Pubmed	4.74E-04	1.00E+00	9.99E-04	8.90E-03	1	1	CRH
Pubmed	23904607	Neuropeptide y gates a stress-induced, long-lasting plasticity in the sympathetic nervous system.	Pubmed	4.74E-04	1.00E+00	9.99E-04	8.90E-03	1	1	NPY
Pubmed	15850450	Neuropeptide Y expression, localization and cellular transducing effects in HUVEC.	Pubmed	4.74E-04	1.00E+00	9.99E-04	8.90E-03	1	1	NPY
Pubmed	11872679	Attenuation of diabetic hyperphagia in neuropeptide Y--deficient mice.	Pubmed	4.74E-04	1.00E+00	9.99E-04	8.90E-03	1	1	NPY
Pubmed	6432893	Hypothalamic hypothyroidism due to isolated thyrotropin-releasing hormone (TRH) deficiency.	Pubmed	4.74E-04	1.00E+00	9.99E-04	8.90E-03	1	1	TRH
Pubmed	10781846	Footshock-induced changes in brain catecholamines and indoleamines are not mediated by CRF or ACTH.	Pubmed	4.74E-04	1.00E+00	9.99E-04	8.90E-03	1	1	CRH
Pubmed	28359740	Bilateral tactile hypersensitivity and neuroimmune responses after spared nerve injury in mice lacking vasoactive intestinal peptide.	Pubmed	4.74E-04	1.00E+00	9.99E-04	8.90E-03	1	1	VIP
Pubmed	24640563	Relaxin and preterm birth.	Pubmed	4.74E-04	1.00E+00	9.99E-04	8.90E-03	1	1	RLN1
Pubmed	16244497	Expression analysis of hypothalamic and pituitary components of the growth hormone axis in fasted and streptozotocin-treated neuropeptide Y (NPY)-intact (NPY+/+) and NPY-knockout (NPY-/-) mice.	Pubmed	4.74E-04	1.00E+00	9.99E-04	8.90E-03	1	1	NPY
Pubmed	27391423	Parathyroid Hormone-Related Peptide (1-36) Enhances Beta Cell Regeneration and Increases Beta Cell Mass in a Mouse Model of Partial Pancreatectomy.	Pubmed	4.74E-04	1.00E+00	9.99E-04	8.90E-03	1	1	PTHLH
Pubmed	20457200	Cholecystokinin in plasma and cerebrospinal fluid--a study in healthy young women.	Pubmed	4.74E-04	1.00E+00	9.99E-04	8.90E-03	1	1	CCK
Pubmed	11713976	Cholecystokinin and panic disorder: past and future clinical research strategies.	Pubmed	4.74E-04	1.00E+00	9.99E-04	8.90E-03	1	1	CCK
Pubmed	12538599	Minireview: parathyroid hormone-related protein as an intracrine factor--trafficking mechanisms and functional consequences.	Pubmed	4.74E-04	1.00E+00	9.99E-04	8.90E-03	1	1	PTHLH
Pubmed	16912140	Nutrient intake, weight, and Leu7Pro polymorphism in prepro-neuropeptide Y in children.	Pubmed	4.74E-04	1.00E+00	9.99E-04	8.90E-03	1	1	NPY
Pubmed	16687500	Psychostimulant-induced attenuation of hyperactivity and prepulse inhibition deficits in Adcyap1-deficient mice.	Pubmed	4.74E-04	1.00E+00	9.99E-04	8.90E-03	1	1	ADCYAP1
Pubmed	24333694	Cortistatin attenuates inflammatory pain via spinal and peripheral actions.	Pubmed	4.74E-04	1.00E+00	9.99E-04	8.90E-03	1	1	CORT
Pubmed	22363652	Ghrelin indirectly activates hypophysiotropic CRF neurons in rodents.	Pubmed	4.74E-04	1.00E+00	9.99E-04	8.90E-03	1	1	CRH
Pubmed	22869609	CRH activation of different signaling pathways results in differential calcium signaling in human pregnant myometrium before and during labor.	Pubmed	4.74E-04	1.00E+00	9.99E-04	8.90E-03	1	1	CRH
Pubmed	15126561	Neuropeptide Y gene expression is increased in the hypothalamus of older women.	Pubmed	4.74E-04	1.00E+00	9.99E-04	8.90E-03	1	1	NPY
Pubmed	18709137	Lowered cortistatin expression is an early event in the human diabetic retina and is associated with apoptosis and glial activation.	Pubmed	4.74E-04	1.00E+00	9.99E-04	8.90E-03	1	1	CORT
Pubmed	22073145	Changes in CRH and ACTH synthesis during experimental and human septic shock.	Pubmed	4.74E-04	1.00E+00	9.99E-04	8.90E-03	1	1	CRH
Pubmed	22706982	Pediatric brainstem gangliogliomas show overexpression of neuropeptide prepronociceptin (PNOC) by microarray and immunohistochemistry.	Pubmed	4.74E-04	1.00E+00	9.99E-04	8.90E-03	1	1	PNOC
Pubmed	9168905	Solution conformation of nociceptin.	Pubmed	4.74E-04	1.00E+00	9.99E-04	8.90E-03	1	1	PNOC
Pubmed	11568656	Nociceptin-induced internalization of the ORL1 receptor in human neuroblastoma cells.	Pubmed	4.74E-04	1.00E+00	9.99E-04	8.90E-03	1	1	PNOC
Pubmed	24817409	Cholecystokinin mediates progression and metastasis of pancreatic cancer associated with dietary fat.	Pubmed	4.74E-04	1.00E+00	9.99E-04	8.90E-03	1	1	CCK
Pubmed	28698051	Effects of pituitary adenylate cyclase activating polypeptide on small intestinal INT 407 cells.	Pubmed	4.74E-04	1.00E+00	9.99E-04	8.90E-03	1	1	ADCYAP1
Pubmed	27908224	Serum substance P concentrations to predict oocyte maturation index and clinical pregnancy.	Pubmed	4.74E-04	1.00E+00	9.99E-04	8.90E-03	1	1	TAC1
Pubmed	10518582	Resistance to excitotoxin-induced seizures and neuronal death in mice lacking the preprotachykinin A gene.	Pubmed	4.74E-04	1.00E+00	9.99E-04	8.90E-03	1	1	TAC1
Pubmed	12583606	Placental stress factors and maternal-fetal adaptive response: the corticotropin-releasing factor family.	Pubmed	4.74E-04	1.00E+00	9.99E-04	8.90E-03	1	1	CRH
Pubmed	15743365	Effect of CCK-1 antagonist, dexloxiglumide, in female patients with irritable bowel syndrome: a pharmacodynamic and pharmacogenomic study.	Pubmed	4.74E-04	1.00E+00	9.99E-04	8.90E-03	1	1	CCK
Pubmed	20117110	Cholecystokinin knockout mice are resistant to high-fat diet-induced obesity.	Pubmed	4.74E-04	1.00E+00	9.99E-04	8.90E-03	1	1	CCK
Pubmed	16914231	Dysregulation of dynorphins in Alzheimer disease.	Pubmed	4.74E-04	1.00E+00	9.99E-04	8.90E-03	1	1	PDYN
Pubmed	27346531	Control of Mitral/Tufted Cell Output by Selective Inhibition among Olfactory Bulb Glomeruli.	Pubmed	4.74E-04	1.00E+00	9.99E-04	8.90E-03	1	1	CCK
Pubmed	23995243	Substance P and intensity of pruritus in hemodialysis and peritoneal dialysis patients.	Pubmed	4.74E-04	1.00E+00	9.99E-04	8.90E-03	1	1	TAC1
Pubmed	14700748	Neurokinin B causes concentration-dependent relaxation of isolated human placental resistance vessels.	Pubmed	4.74E-04	1.00E+00	9.99E-04	8.90E-03	1	1	TAC3
Pubmed	409699	Localization of neurotensin-immunoreactive cells in the small intestine of man and various mammals.	Pubmed	4.74E-04	1.00E+00	9.99E-04	8.90E-03	1	1	NTS
Pubmed	2427515	Characterization, sequence, and expression of the cloned human neuropeptide Y gene.	Pubmed	4.74E-04	1.00E+00	9.99E-04	8.90E-03	1	1	NPY
Pubmed	16529859	Genetic variant of prodynorphin gene is risk factor for methamphetamine dependence.	Pubmed	4.74E-04	1.00E+00	9.99E-04	8.90E-03	1	1	PDYN
Pubmed	7867564	Ligand requirements of the human corticotropin-releasing factor-binding protein.	Pubmed	4.74E-04	1.00E+00	9.99E-04	8.90E-03	1	1	CRH
Pubmed	14669820	Presence of cortistatin in the human pancreas.	Pubmed	4.74E-04	1.00E+00	9.99E-04	8.90E-03	1	1	CORT
Pubmed	10082806	Biotransformation of nociceptin/orphanin FQ by enzyme activity from morphine-naive and morphine-treated cell cultures.	Pubmed	4.74E-04	1.00E+00	9.99E-04	8.90E-03	1	1	PNOC
Pubmed	17275031	Vasoactive intestinal peptide inhibits adhesion molecule expression in activated human colon serosal fibroblasts by preventing NF-kappaB activation.	Pubmed	4.74E-04	1.00E+00	9.99E-04	8.90E-03	1	1	VIP
Pubmed	22884536	Secretoneurin, substance P and neuropeptide Y in the oxygen-induced retinopathy in C57Bl/6N mice.	Pubmed	4.74E-04	1.00E+00	9.99E-04	8.90E-03	1	1	NPY
Pubmed	11156472	Biosynthesis of proteoglycan in bone and cartilage of parathyroid hormone-related protein knockout mice.	Pubmed	4.74E-04	1.00E+00	9.99E-04	8.90E-03	1	1	PTHLH
Pubmed	17066479	A resistance gene in disguise for schizophrenia?	Pubmed	4.74E-04	1.00E+00	9.99E-04	8.90E-03	1	1	NPY
Pubmed	24699455	Neuropeptide Y induces potent migration of human immature dendritic cells and promotes a Th2 polarization.	Pubmed	4.74E-04	1.00E+00	9.99E-04	8.90E-03	1	1	NPY
Pubmed	11719021	Expression of orphanin FQ and the opioid receptor-like (ORL1) receptor in the developing human and rat brain.	Pubmed	4.74E-04	1.00E+00	9.99E-04	8.90E-03	1	1	PNOC
Pubmed	11124583	Attenuation of luteinizing hormone surges in neuropeptide Y knockout mice.	Pubmed	4.74E-04	1.00E+00	9.99E-04	8.90E-03	1	1	NPY
Pubmed	28890052	Neuropeptide Y and its Involvement in Chronic Pain.	Pubmed	4.74E-04	1.00E+00	9.99E-04	8.90E-03	1	1	NPY
Pubmed	3839058	Presence of the predicted C-flanking peptide of neuropeptide Y (CPON) in tissue extracts.	Pubmed	4.74E-04	1.00E+00	9.99E-04	8.90E-03	1	1	NPY
Pubmed	7708054	Differential expression of RNA transcripts encoding unique carboxy-terminal sequences of human parathyroid hormone-related peptide.	Pubmed	4.74E-04	1.00E+00	9.99E-04	8.90E-03	1	1	PTHLH
Pubmed	8137267	Receptor subtype expression and responsiveness to bombesin in cultured human bronchial epithelial cells.	Pubmed	4.74E-04	1.00E+00	9.99E-04	8.90E-03	1	1	GRP
Pubmed	7516868	Cytokine regulation of parathyroid hormone-related protein messenger ribonucleic acid levels in mouse spleen: paradoxical effects of interferon-gamma and interleukin-4.	Pubmed	4.74E-04	1.00E+00	9.99E-04	8.90E-03	1	1	PTHLH
Pubmed	24228003	Effect of vasoactive intestinal peptide (VIP) on NKG2D signal pathway and its contribution to immune escape of MKN45 cells.	Pubmed	4.74E-04	1.00E+00	9.99E-04	8.90E-03	1	1	VIP
Pubmed	16205360	Mice deficient in corticotropin-releasing factor receptor type 2 exhibit normal ethanol-associated behaviors.	Pubmed	4.74E-04	1.00E+00	9.99E-04	8.90E-03	1	1	CRH
Pubmed	11738809	Chronic administration of neuropeptide Y into the lateral ventricle of C57BL/6J male mice produces an obesity syndrome including hyperphagia, hyperleptinemia, insulin resistance, and hypogonadism.	Pubmed	4.74E-04	1.00E+00	9.99E-04	8.90E-03	1	1	NPY
Pubmed	26769362	Effect of the pituitary adenylate cyclase-activating polypeptide on the autophagic activation observed in in vitro and in vivo models of Parkinson's disease.	Pubmed	4.74E-04	1.00E+00	9.99E-04	8.90E-03	1	1	ADCYAP1
Pubmed	24108003	Enhanced autophagy blocks angiogenesis via degradation of gastrin-releasing peptide in neuroblastoma cells.	Pubmed	4.74E-04	1.00E+00	9.99E-04	8.90E-03	1	1	GRP
Pubmed	30455472	Pulmonary phagocyte-derived NPY controls the pathology of severe influenza virus infection.	Pubmed	4.74E-04	1.00E+00	9.99E-04	8.90E-03	1	1	NPY
Pubmed	24228853	Role of vasoactive intestinal peptide in chronic obstructive pulmonary disease with pulmonary hypertension.	Pubmed	4.74E-04	1.00E+00	9.99E-04	8.90E-03	1	1	VIP
Pubmed	22967761	Role of the type 2 iodothyronine deiodinase (D2) in the control of thyroid hormone signaling.	Pubmed	4.74E-04	1.00E+00	9.99E-04	8.90E-03	1	1	TRH
Pubmed	25957307	Th17 polarization of memory Th cells in early arthritis: the vasoactive intestinal peptide effect.	Pubmed	4.74E-04	1.00E+00	9.99E-04	8.90E-03	1	1	VIP
Pubmed	23232501	Loss of substance P and inflammation precede delayed neurodegeneration in the substantia nigra after cerebral ischemia.	Pubmed	4.74E-04	1.00E+00	9.99E-04	8.90E-03	1	1	TAC1
Pubmed	7753797	Replication factor encoded by a putative oncogene, set, associated with myeloid leukemogenesis.	Pubmed	4.74E-04	1.00E+00	9.99E-04	8.90E-03	1	1	SET
Pubmed	25485475	TRH-receptor mobility and function in intact and cholesterol-depleted plasma membrane of HEK293 cells stably expressing TRH-R-eGFP.	Pubmed	4.74E-04	1.00E+00	9.99E-04	8.90E-03	1	1	TRH
Pubmed	22289186	High frequency of Neuropeptide Y Leu7Pro polymorphism in an Iranian population and its association with coronary artery disease.	Pubmed	4.74E-04	1.00E+00	9.99E-04	8.90E-03	1	1	NPY
Pubmed	8421707	Expression of the human neuropeptide tyrosine Y1 receptor.	Pubmed	4.74E-04	1.00E+00	9.99E-04	8.90E-03	1	1	NPY
Pubmed	11456271	PTHrP and PTH/PTHrP receptor expressions in human endometrium.	Pubmed	4.74E-04	1.00E+00	9.99E-04	8.90E-03	1	1	PTHLH
Pubmed	22796192	H3K27 methylation and H3S28 phosphorylation-dependent transcriptional regulation by INHAT subunit SET/TAF-I?.	Pubmed	4.74E-04	1.00E+00	9.99E-04	8.90E-03	1	1	SET
Pubmed	15358593	Inhibition of mitochondrial gene transcription suppresses neurotensin secretion in the human carcinoid cell line BON.	Pubmed	4.74E-04	1.00E+00	9.99E-04	8.90E-03	1	1	NTS
Pubmed	24597258	Corticotropin-releasing hormone and progesterone plasma levels association with the onset and progression of labor.	Pubmed	4.74E-04	1.00E+00	9.99E-04	8.90E-03	1	1	CRH
Pubmed	16930836	In vivo siRNA delivery to the mouse hypothalamus confirms distinct roles of TR beta isoforms in regulating TRH transcription.	Pubmed	4.74E-04	1.00E+00	9.99E-04	8.90E-03	1	1	TRH
Pubmed	19200949	Decreased neurokinin-1 (substance P) receptor binding in patients with panic disorder: positron emission tomographic study with [18F]SPA-RQ.	Pubmed	4.74E-04	1.00E+00	9.99E-04	8.90E-03	1	1	TAC1
Pubmed	24946072	Increased CRF mRNA expression in the sexually dimorphic BNST of male but not female GAD67 mice and TMT predator odor stress effects upon spatial memory retrieval.	Pubmed	4.74E-04	1.00E+00	9.99E-04	8.90E-03	1	1	CRH
Pubmed	12051390	Corticotropin releasing hormone promoter polymorphisms in giant cell arteritis and polymyalgia rheumatica.	Pubmed	4.74E-04	1.00E+00	9.99E-04	8.90E-03	1	1	CRH
Pubmed	18334734	Transcriptionally less active prodynorphin promoter alleles are associated with temporal lobe epilepsy: a case-control study and meta-analysis.	Pubmed	4.74E-04	1.00E+00	9.99E-04	8.90E-03	1	1	PDYN
Pubmed	25523790	PACAP38/PAC1 signaling induces bone marrow-derived cells homing to ischemic brain.	Pubmed	4.74E-04	1.00E+00	9.99E-04	8.90E-03	1	1	ADCYAP1
Pubmed	19672038	Over-expression of pancreatic pituitary adenylate cyclase-activating polypeptide (PACAP) aggravates cerulein-induced acute pancreatitis in mice.	Pubmed	4.74E-04	1.00E+00	9.99E-04	8.90E-03	1	1	ADCYAP1
Pubmed	17766644	Identification of a novel mammalian post-translational modification, phosphocholine, on placental secretory polypeptides.	Pubmed	4.74E-04	1.00E+00	9.99E-04	8.90E-03	1	1	CRH
Pubmed	14573544	Target-specific neuropeptide Y-ergic synaptic inhibition and its network consequences within the mammalian thalamus.	Pubmed	4.74E-04	1.00E+00	9.99E-04	8.90E-03	1	1	NPY
Pubmed	26394663	Cholecystokinin expression in the ?-cell leads to increased ?-cell area in aged mice and protects from streptozotocin-induced diabetes and apoptosis.	Pubmed	4.74E-04	1.00E+00	9.99E-04	8.90E-03	1	1	CCK
Pubmed	28408247	Absence of PTHrP nuclear localization and C-terminus sequences leads to abnormal development of T cells.	Pubmed	4.74E-04	1.00E+00	9.99E-04	8.90E-03	1	1	PTHLH
Pubmed	18616565	Behavioural profile of a new mouse model for NPY deficiency.	Pubmed	4.74E-04	1.00E+00	9.99E-04	8.90E-03	1	1	NPY
Pubmed	27193687	An obligatory role for neurotensin in high-fat-diet-induced obesity.	Pubmed	4.74E-04	1.00E+00	9.99E-04	8.90E-03	1	1	NTS
Pubmed	19959711	Parathyroid hormone-related protein promotes epithelial-mesenchymal transition.	Pubmed	4.74E-04	1.00E+00	9.99E-04	8.90E-03	1	1	PTHLH
Pubmed	9262184	Presence and characterization of nociceptin (orphanin FQ) receptor binding in adult rat and human fetal hypothalamus.	Pubmed	4.74E-04	1.00E+00	9.99E-04	8.90E-03	1	1	PNOC
Pubmed	21126550	Investigation of gastrin-releasing peptide as a mediator for 5'-guanidinonaltrindole-induced compulsive scratching in mice.	Pubmed	4.74E-04	1.00E+00	9.99E-04	8.90E-03	1	1	GRP
Pubmed	26876205	Upregulation of the oncoprotein SET determines poor clinical outcomes in hepatocellular carcinoma and shows therapeutic potential.	Pubmed	4.74E-04	1.00E+00	9.99E-04	8.90E-03	1	1	SET
Pubmed	26164485	Effects of an opioid (proenkephalin) polymorphism on neural response to errors in health and cocaine use disorder.	Pubmed	4.74E-04	1.00E+00	9.99E-04	8.90E-03	1	1	PENK
Pubmed	12878188	Analysis of a repressor region in the human neuropeptide Y gene that binds Oct-1 and Pbx-1 in GT1-7 neurons.	Pubmed	4.74E-04	1.00E+00	9.99E-04	8.90E-03	1	1	NPY
Pubmed	16383010	NPY and chronic neurodegenerative disease.	Pubmed	4.74E-04	1.00E+00	9.99E-04	8.90E-03	1	1	NPY
Pubmed	22189180	The possible link between the elevated serum levels of neurokinin A and anti-ribosomal P protein antibodies in children with autism.	Pubmed	4.74E-04	1.00E+00	9.99E-04	8.90E-03	1	1	TAC1
Pubmed	15956736	Does human relaxin accelerate orthodontic tooth movement in rats?	Pubmed	4.74E-04	1.00E+00	9.99E-04	8.90E-03	1	1	RLN1
Pubmed	16160861	Incongruent pattern of neurokinin B expression in rat and mouse brains.	Pubmed	4.74E-04	1.00E+00	9.99E-04	8.90E-03	1	1	TAC3
Pubmed	1708331	Hypertrophy and increased gene expression of neurons containing neurokinin-B and substance-P messenger ribonucleic acids in the hypothalami of postmenopausal women.	Pubmed	4.74E-04	1.00E+00	9.99E-04	8.90E-03	1	1	TAC3
Pubmed	11113362	Detection of substance P and its receptor in human fetal microglia.	Pubmed	4.74E-04	1.00E+00	9.99E-04	8.90E-03	1	1	TAC1
Pubmed	15926114	Leu7Pro polymorphism in the neuropeptide Y (NPY) gene is associated with impaired glucose tolerance and type 2 diabetes in Swedish men.	Pubmed	4.74E-04	1.00E+00	9.99E-04	8.90E-03	1	1	NPY
Pubmed	7589495	Proopiomelanocortin, corticotropin releasing hormone and corticotropin releasing hormone receptor genes are expressed in human skin.	Pubmed	4.74E-04	1.00E+00	9.99E-04	8.90E-03	1	1	CRH
Pubmed	10393986	Stress-induced behaviors require the corticotropin-releasing hormone (CRH) receptor, but not CRH.	Pubmed	4.74E-04	1.00E+00	9.99E-04	8.90E-03	1	1	CRH
Pubmed	3938792	Central hypothyroidism: isolated thyrotropin-releasing hormone deficiency or resistance of pituitary thyrotropes?	Pubmed	4.74E-04	1.00E+00	9.99E-04	8.90E-03	1	1	TRH
Pubmed	2433692	Three rat preprotachykinin mRNAs encode the neuropeptides substance P and neurokinin A.	Pubmed	4.74E-04	1.00E+00	9.99E-04	8.90E-03	1	1	TAC1
Pubmed	9920454	Vasoactive intestinal polypeptide induces analgesia and impairs the antinociceptive effect of morphine in mice.	Pubmed	4.74E-04	1.00E+00	9.99E-04	8.90E-03	1	1	VIP
Pubmed	23983616	PTHrP expression in human MDA-MB-231 breast cancer cells is critical for tumor growth and survival and osteoblast inhibition.	Pubmed	4.74E-04	1.00E+00	9.99E-04	8.90E-03	1	1	PTHLH
Pubmed	30893297	Lateral hypothalamic neurotensin neurons promote arousal and hyperthermia.	Pubmed	4.74E-04	1.00E+00	9.99E-04	8.90E-03	1	1	NTS
Pubmed	19339623	Endogenous kappa opioid activation mediates stress-induced deficits in learning and memory.	Pubmed	4.74E-04	1.00E+00	9.99E-04	8.90E-03	1	1	PDYN
Pubmed	24356581	The role of neurokinin B signalling in reproductive neuroendocrinology.	Pubmed	4.74E-04	1.00E+00	9.99E-04	8.90E-03	1	1	TAC3
Pubmed	9185516	Impaired diurnal adrenal rhythmicity restored by constant infusion of corticotropin-releasing hormone in corticotropin-releasing hormone-deficient mice.	Pubmed	4.74E-04	1.00E+00	9.99E-04	8.90E-03	1	1	CRH
Pubmed	16185267	The relaxin gene knockout mouse: a model of progressive scleroderma.	Pubmed	4.74E-04	1.00E+00	9.99E-04	8.90E-03	1	1	RLN1
Pubmed	23447598	Pro- and anti-mitogenic actions of pituitary adenylate cyclase-activating polypeptide in developing cerebral cortex: potential mediation by developmental switch of PAC1 receptor mRNA isoforms.	Pubmed	4.74E-04	1.00E+00	9.99E-04	8.90E-03	1	1	ADCYAP1
Pubmed	12734882	Corticotropin-releasing hormone promoter polymorphisms in patients with rheumatoid arthritis from northwest Spain.	Pubmed	4.74E-04	1.00E+00	9.99E-04	8.90E-03	1	1	CRH
Pubmed	8957234	Inhibitory effects of calcitonin gene-related peptide on substance-P-induced superoxide production in human neutrophils.	Pubmed	4.74E-04	1.00E+00	9.99E-04	8.90E-03	1	1	TAC1
Pubmed	23430272	Corticotropin-releasing hormone affects short immobilization stress-induced changes in lung cytosolic and membrane glucocorticoid binding sites.	Pubmed	4.74E-04	1.00E+00	9.99E-04	8.90E-03	1	1	CRH
Pubmed	19523041	Modulation of MDMA-induced behavioral and transcriptional effects by the delta opioid antagonist naltrindole in mice.	Pubmed	4.74E-04	1.00E+00	9.99E-04	8.90E-03	1	1	PENK
Pubmed	29729168	Changes in cholecystokinin level in patients with gastroesophageal reflux disease on the background of type II diabetes.	Pubmed	4.74E-04	1.00E+00	9.99E-04	8.90E-03	1	1	CCK
Pubmed	20100531	Plasma nociceptin/orphanin FQ levels in response to the hyperventilation test in healthy subjects.	Pubmed	4.74E-04	1.00E+00	9.99E-04	8.90E-03	1	1	PNOC
Pubmed	22542942	Nociceptin is upregulated by FSH signaling in Sertoli cells in murine testes.	Pubmed	4.74E-04	1.00E+00	9.99E-04	8.90E-03	1	1	PNOC
Pubmed	9773788	Expression of SET, an inhibitor of protein phosphatase 2A, in renal development and Wilms' tumor.	Pubmed	4.74E-04	1.00E+00	9.99E-04	8.90E-03	1	1	SET
Pubmed	9783915	Procorticotrophin-releasing hormone: endoproteolytic processing and differential release of its derived peptides within AtT20 cells.	Pubmed	4.74E-04	1.00E+00	9.99E-04	8.90E-03	1	1	CRH
Pubmed	25057791	Visualization of corticotropin-releasing factor neurons by fluorescent proteins in the mouse brain and characterization of labeled neurons in the paraventricular nucleus of the hypothalamus.	Pubmed	4.74E-04	1.00E+00	9.99E-04	8.90E-03	1	1	CRH
Pubmed	16009465	Endogenous PACAP acts as a stress response peptide to protect cerebellar neurons from ethanol or oxidative insult.	Pubmed	4.74E-04	1.00E+00	9.99E-04	8.90E-03	1	1	ADCYAP1
Pubmed	24704498	Cholecystokinin octapeptide regulates the differentiation and effector cytokine production of CD4(+) T cells in vitro.	Pubmed	4.74E-04	1.00E+00	9.99E-04	8.90E-03	1	1	CCK
Pubmed	9218516	Vasoactive intestinal peptide prevents excitotoxic cell death in the murine developing brain.	Pubmed	4.74E-04	1.00E+00	9.99E-04	8.90E-03	1	1	VIP
Pubmed	9655475	Human lymphocytes express substance P and its receptor.	Pubmed	4.74E-04	1.00E+00	9.99E-04	8.90E-03	1	1	TAC1
Pubmed	14564346	Elevated substance P levels in nasal lavage fluids from patients with chronic nonproductive cough and increased cough sensitivity to inhaled capsaicin.	Pubmed	4.74E-04	1.00E+00	9.99E-04	8.90E-03	1	1	TAC1
Pubmed	20621353	Impaired nocifensive behaviours and mechanical hyperalgesia, but enhanced thermal allodynia in pituitary adenylate cyclase-activating polypeptide deficient mice.	Pubmed	4.74E-04	1.00E+00	9.99E-04	8.90E-03	1	1	ADCYAP1
Pubmed	22468884	Lateralized response of dynorphin a peptide levels after traumatic brain injury.	Pubmed	4.74E-04	1.00E+00	9.99E-04	8.90E-03	1	1	PDYN
Pubmed	23399917	An important role for cholecystokinin, a CLOCK target gene, in the development and treatment of manic-like behaviors.	Pubmed	4.74E-04	1.00E+00	9.99E-04	8.90E-03	1	1	CCK
Pubmed	12531461	Neurotensin expressing neurons developed earlier than vasoactive intestinal polypeptide and vasopressin expressing neurons in the human suprachiasmatic nucleus.	Pubmed	4.74E-04	1.00E+00	9.99E-04	8.90E-03	1	1	NTS
Pubmed	20043013	Corticotropin-releasing hormone stimulates the in situ generation of mast cells from precursors in the human hair follicle mesenchyme.	Pubmed	4.74E-04	1.00E+00	9.99E-04	8.90E-03	1	1	CRH
Pubmed	17658665	Methamphetamine-induced hyperactivity and behavioral sensitization in PACAP deficient mice.	Pubmed	4.74E-04	1.00E+00	9.99E-04	8.90E-03	1	1	ADCYAP1
Pubmed	20945407	Gastrin-releasing peptide: predictor of castration-resistant prostate cancer?	Pubmed	4.74E-04	1.00E+00	9.99E-04	8.90E-03	1	1	GRP
Pubmed	11760831	Parathyroid hormone-related protein is required for normal intramembranous bone development.	Pubmed	4.74E-04	1.00E+00	9.99E-04	8.90E-03	1	1	PTHLH
Pubmed	15193419	Species differences in brain pre-pro-neurotensin/neuromedin N mRNA distribution: the expression pattern in mice resembles more closely that of primates than rats.	Pubmed	4.74E-04	1.00E+00	9.99E-04	8.90E-03	1	1	NTS
Pubmed	16888223	Serotonergic inhibition of intense jumping behavior in mice lacking PACAP (Adcyap1-/-).	Pubmed	4.74E-04	1.00E+00	9.99E-04	8.90E-03	1	1	ADCYAP1
Pubmed	29625453	Substance P Modulation of Human and Murine Corneal Neovascularization.	Pubmed	4.74E-04	1.00E+00	9.99E-04	8.90E-03	1	1	TAC1
Pubmed	19119412	Neuropeptide Y gene polymorphisms confer risk of early-onset atherosclerosis.	Pubmed	4.74E-04	1.00E+00	9.99E-04	8.90E-03	1	1	NPY
Pubmed	23637859	Chronic restraint stress inhibits hair growth via substance P mediated by reactive oxygen species in mice.	Pubmed	4.74E-04	1.00E+00	9.99E-04	8.90E-03	1	1	TAC1
Pubmed	30487571	Connectivity and network state-dependent recruitment of long-range VIP-GABAergic neurons in the mouse hippocampus.	Pubmed	4.74E-04	1.00E+00	9.99E-04	8.90E-03	1	1	VIP
Pubmed	28008860	Basal Serum Neurokinin B Levels in Differentiating Idiopathic Central Precocious Puberty from Premature Thelarche.	Pubmed	4.74E-04	1.00E+00	9.99E-04	8.90E-03	1	1	TAC3
Pubmed	20800572	Negative regulation of neuronal cell differentiation by INHAT subunit SET/TAF-I?.	Pubmed	4.74E-04	1.00E+00	9.99E-04	8.90E-03	1	1	SET
Pubmed	27802308	Bone Injury and Repair Trigger Central and Peripheral NPY Neuronal Pathways.	Pubmed	4.74E-04	1.00E+00	9.99E-04	8.90E-03	1	1	NPY
Pubmed	29351428	Control of appetite, blood glucose, and blood pressure during melanocortin-4 receptor activation in normoglycemic and diabetic NPY-deficient mice.	Pubmed	4.74E-04	1.00E+00	9.99E-04	8.90E-03	1	1	NPY
Pubmed	15750618	Gastrin-releasing peptide (GRP) induces angiogenesis and the specific GRP blocker 77427 inhibits tumor growth in vitro and in vivo.	Pubmed	4.74E-04	1.00E+00	9.99E-04	8.90E-03	1	1	GRP
Pubmed	10808051	Th2-dependent airway eosinophilia is regulated by preproenkephalin.	Pubmed	4.74E-04	1.00E+00	9.99E-04	8.90E-03	1	1	PENK
Pubmed	22933799	Selective functional interactions between excitatory and inhibitory cortical neurons and differential contribution to persistent activity of the slow oscillation.	Pubmed	4.74E-04	1.00E+00	9.99E-04	8.90E-03	1	1	VIP
Pubmed	21696394	Heterozygous deletion at the RLN1 locus in a family with testicular germ cell cancer identified by integrating copy number variation data with phenome and interactome information.	Pubmed	4.74E-04	1.00E+00	9.99E-04	8.90E-03	1	1	RLN1
Pubmed	23468908	A neuropeptide Y variant (rs16139) associated with major depressive disorder in replicate samples from Chinese Han population.	Pubmed	4.74E-04	1.00E+00	9.99E-04	8.90E-03	1	1	NPY
Pubmed	18205183	PACAP provides colonic protection against dextran sodium sulfate induced colitis.	Pubmed	4.74E-04	1.00E+00	9.99E-04	8.90E-03	1	1	ADCYAP1
Pubmed	30010830	Lateral Hypothalamic Area Neurotensin Neurons Are Required for Control of Orexin Neurons and Energy Balance.	Pubmed	4.74E-04	1.00E+00	9.99E-04	8.90E-03	1	1	NTS
Pubmed	8386360	Solution structure of human corticotropin releasing factor by 1H NMR and distance geometry with restrained molecular dynamics.	Pubmed	4.74E-04	1.00E+00	9.99E-04	8.90E-03	1	1	CRH
Pubmed	10655922	Neither nociceptin nor its receptor are present in human synovial fluid or tissue.	Pubmed	4.74E-04	1.00E+00	9.99E-04	8.90E-03	1	1	PNOC
Pubmed	14973316	Circadian rhythm in inhibitory synaptic transmission in the mouse suprachiasmatic nucleus.	Pubmed	4.74E-04	1.00E+00	9.99E-04	8.90E-03	1	1	VIP
Pubmed	16740657	Characterization of a ultraviolet B-induced corticotropin-releasing hormone-proopiomelanocortin system in human melanocytes.	Pubmed	4.74E-04	1.00E+00	9.99E-04	8.90E-03	1	1	CRH
Pubmed	25449842	Striatal dopamine receptor plasticity in neurotensin deficient mice.	Pubmed	4.74E-04	1.00E+00	9.99E-04	8.90E-03	1	1	NTS
Pubmed	20556927	Expression of parathyroid hormone-related protein in human inflamed dental pulp.	Pubmed	4.74E-04	1.00E+00	9.99E-04	8.90E-03	1	1	PTHLH
Pubmed	8662940	Structure-activity relationship studies on the novel neuropeptide orphanin FQ.	Pubmed	4.74E-04	1.00E+00	9.99E-04	8.90E-03	1	1	PNOC
Pubmed	19560501	Plasma nociceptin/orphanin FQ levels rise after spontaneous episodes of angina, but not during induced myocardial ischemia.	Pubmed	4.74E-04	1.00E+00	9.99E-04	8.90E-03	1	1	PNOC
Pubmed	12865891	Reversal of startle gating deficits in transgenic mice overexpressing corticotropin-releasing factor by antipsychotic drugs.	Pubmed	4.74E-04	1.00E+00	9.99E-04	8.90E-03	1	1	CRH
Pubmed	11854458	Up-regulation of nitric oxide synthase and modulation of the guanylate cyclase activity by corticotropin-releasing hormone but not urocortin II or urocortin III in cultured human pregnant myometrial cells.	Pubmed	4.74E-04	1.00E+00	9.99E-04	8.90E-03	1	1	CRH
Pubmed	17592029	Lack of vasoactive intestinal peptide reduces testosterone levels and reproductive aging in mouse testis.	Pubmed	4.74E-04	1.00E+00	9.99E-04	8.90E-03	1	1	VIP
Pubmed	10894940	Fine mapping of the human preprocortistatin gene (CORT) to neuroblastoma consensus deletion region 1p36.3-->p36.2, but absence of mutations in primary tumors.	Pubmed	4.74E-04	1.00E+00	9.99E-04	8.90E-03	1	1	CORT
Pubmed	11125007	Cannabinoid withdrawal syndrome is reduced in pre-proenkephalin knock-out mice.	Pubmed	4.74E-04	1.00E+00	9.99E-04	8.90E-03	1	1	PENK
Pubmed	3616618	A parathyroid hormone-related protein implicated in malignant hypercalcemia: cloning and expression.	Pubmed	4.74E-04	1.00E+00	9.99E-04	8.90E-03	1	1	PTHLH
Pubmed	28192115	Substance P enhances proliferation and paracrine potential of adipose-derived stem cells in†vitro.	Pubmed	4.74E-04	1.00E+00	9.99E-04	8.90E-03	1	1	TAC1
Pubmed	1717141	Production of neuromedin B and neuromedin B gene expression in human lung tumor cell lines.	Pubmed	4.74E-04	1.00E+00	9.99E-04	8.90E-03	1	1	NMB
Pubmed	23116540	Multifaces of neuropeptide Y in the brain--neuroprotection, neurogenesis and neuroinflammation.	Pubmed	4.74E-04	1.00E+00	9.99E-04	8.90E-03	1	1	NPY
Pubmed	26878472	Cholecystokinin in plasma predicts cardiovascular mortality in elderly females.	Pubmed	4.74E-04	1.00E+00	9.99E-04	8.90E-03	1	1	CCK
Pubmed	17202374	Vasoactive intestinal peptide balances pro- and anti-inflammatory cytokines in the Pseudomonas aeruginosa-infected cornea and protects against corneal perforation.	Pubmed	4.74E-04	1.00E+00	9.99E-04	8.90E-03	1	1	VIP
Pubmed	23585666	The dynamic pituitary response to escalating-dose TRH stimulation test in hypothyroid patients treated with liothyronine or levothyroxine replacement therapy.	Pubmed	4.74E-04	1.00E+00	9.99E-04	8.90E-03	1	1	TRH
Pubmed	24844859	Substance P is upregulated in the serum of patients with chronic spontaneous urticaria.	Pubmed	4.74E-04	1.00E+00	9.99E-04	8.90E-03	1	1	TAC1
Pubmed	11717384	Absence of delta -9-tetrahydrocannabinol dysphoric effects in dynorphin-deficient mice.	Pubmed	4.74E-04	1.00E+00	9.99E-04	8.90E-03	1	1	PDYN
Pubmed	21872610	Parathyroid hormone-related protein and glucocorticoid receptor beta are regulated by cortisol in the kidney of male mice.	Pubmed	4.74E-04	1.00E+00	9.99E-04	8.90E-03	1	1	PTHLH
Pubmed	8452637	The mouse relaxin gene: nucleotide sequence and expression.	Pubmed	4.74E-04	1.00E+00	9.99E-04	8.90E-03	1	1	RLN1
Pubmed	15624269	Impaired cholecystokinin secretion and disturbed appetite regulation in women with polycystic ovary syndrome.	Pubmed	4.74E-04	1.00E+00	9.99E-04	8.90E-03	1	1	CCK
Pubmed	15707699	Acute administration of alcohol modulates pyroglutamyl amino peptidase II activity and mRNA levels in rat limbic regions.	Pubmed	4.74E-04	1.00E+00	9.99E-04	8.90E-03	1	1	TRH
Pubmed	3748844	Structure and expression of the vasoactive intestinal peptide (VIP) gene in a human tumor.	Pubmed	4.74E-04	1.00E+00	9.99E-04	8.90E-03	1	1	VIP
Pubmed	15126558	Estrogen receptor-mediated down-regulation of corticotropin-releasing hormone gene expression is dependent on a cyclic adenosine 3',5'-monophosphate regulatory element in human placental syncytiotrophoblast cells.	Pubmed	4.74E-04	1.00E+00	9.99E-04	8.90E-03	1	1	CRH
Pubmed	19264362	PreproNPY Pro7 protects against depression despite exposure to environmental risk factors.	Pubmed	4.74E-04	1.00E+00	9.99E-04	8.90E-03	1	1	NPY
[truncated: 6,924 more rows]
